# Supplementary material
Source: PubMed Central journal article supplement (PMC4221874)
Supplement: ac5024217_si_001.pdf [file ac5024217_si_001.pdf]

# Metabolite content profiling of bottlenose dolphin exhaled breath.

Alexander A. Aksenov<sup>1</sup>, Laura Yeates<sup>2</sup>, Alberto Pasamontes<sup>1</sup>, Craig Siebe<sup>1</sup>, Yuriy Zrodnikov<sup>1</sup>, Jason Simmons<sup>1</sup>, Mitchell M. McCartney<sup>1</sup>, Jean-Pierre Deplanque<sup>1</sup>, Randall S. Wells<sup>3</sup>, Cristina E. Davis<sup>1\*</sup>

## AUTHOR ADDRESS

1. Mechanical and Aerospace Engineering, University of California, Davis, CA.
2. National Marine Mammal Foundation, San Diego, CA USA.
3. Chicago Zoological Society, c/o Mote Marine Laboratory, Sarasota, FL USA

\*AUTHOR EMAIL ADDRESS [cedavis@ucdavis.edu](mailto:cedavis@ucdavis.edu)

| Table of Contents                                                                  | Page(s) |
|------------------------------------------------------------------------------------|---------|
| Examples of GC data for EBC of dolphin                                             | S3-S5   |
| Examples of LC data for EBC of dolphin                                             | S6      |
| Loadings plot for the PLSDA analysis                                               | S7      |
| Compounds in dolphin breath identified with GC/MS using chemical derivatization    | S8      |
| Compounds in dolphin breath identified with GC/MS using head space SPME extraction | S8      |
| List of volatile metabolites (GC/MS) detected in sea water                         | S11     |

|                                                                                                                                                    |      |
|----------------------------------------------------------------------------------------------------------------------------------------------------|------|
| List of volatile metabolites (GC/MS) in air condensate                                                                                             | S11  |
| Lists of non-volatile metabolites (LC/MS) for managed and wild population animals using HILIC and RP columns in in positive and negative ion modes | S12  |
| Manually selected best tentative matches for non-volatile metabolites (LC/MS)                                                                      | S393 |

a)

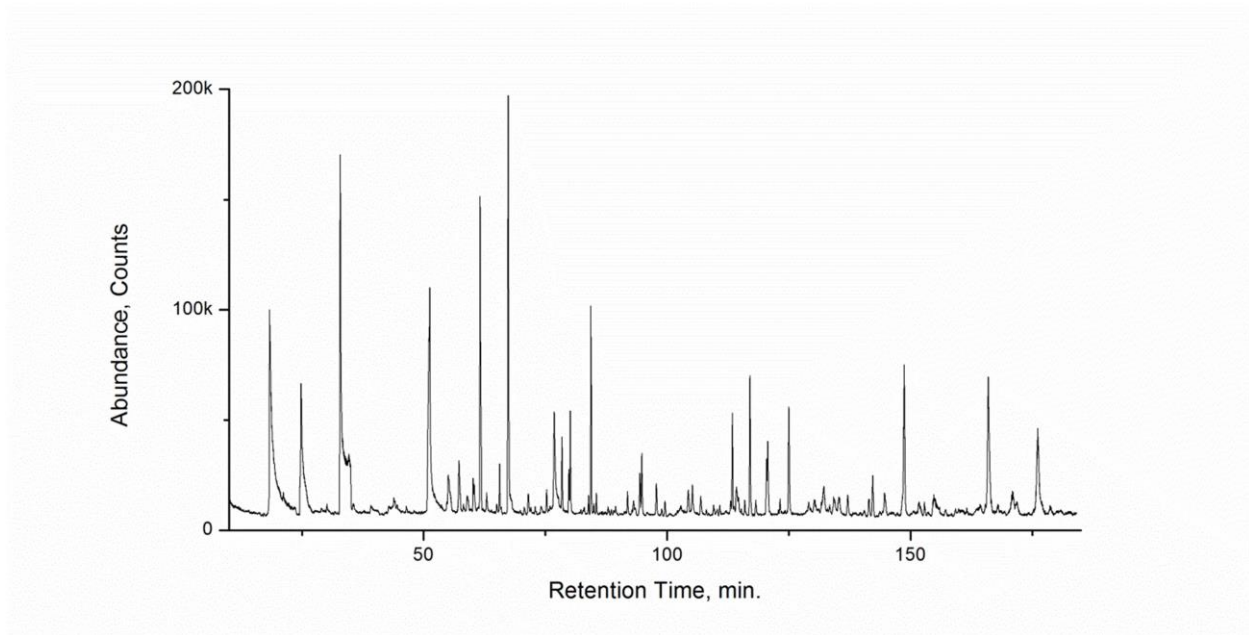

b)

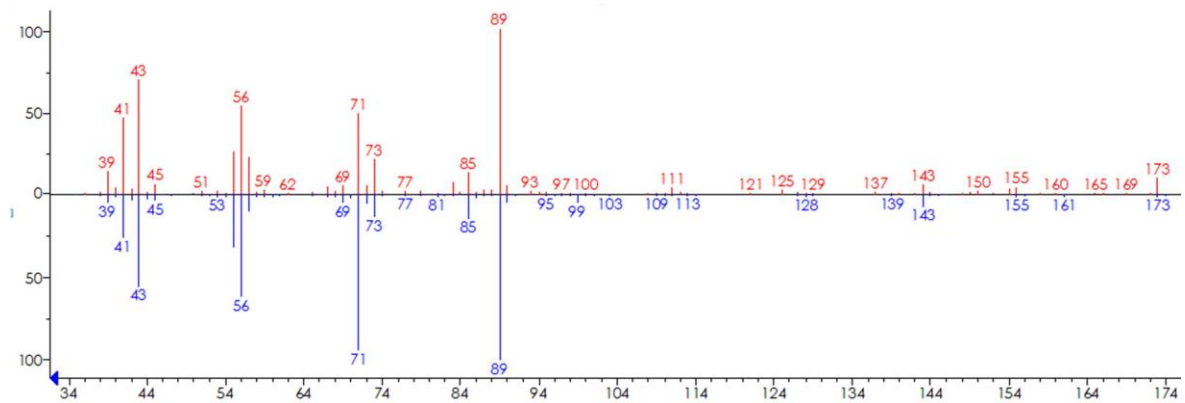

c)

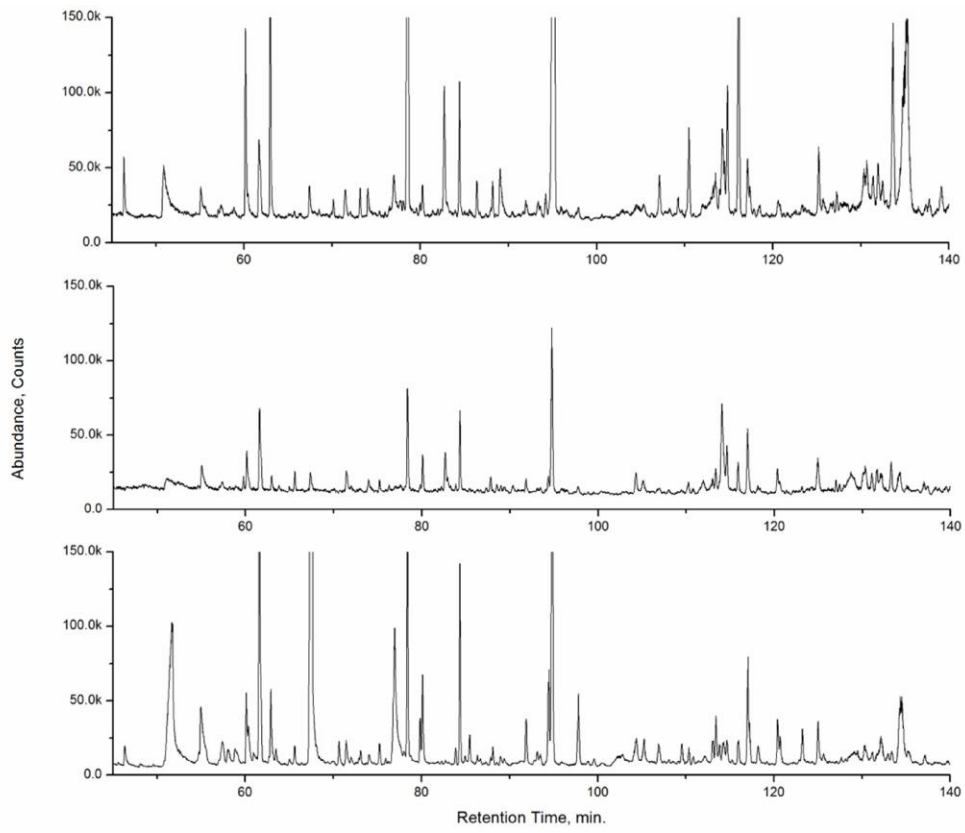



d)

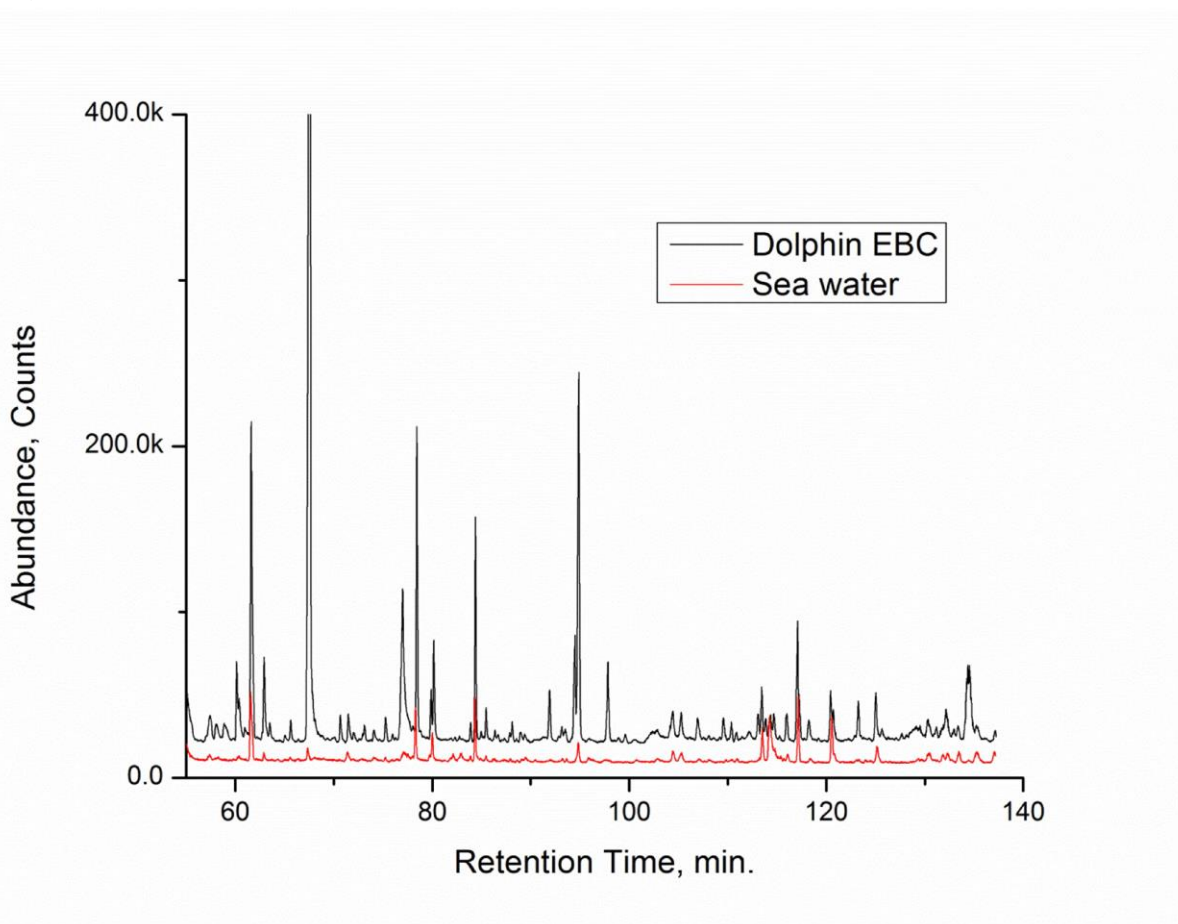

**Figure A1.** GC/MS analysis. a) Typical GC profile for EBC of dolphin. A large number of peaks indicates high chemical information content. b) Example of chemical identification for the compound tentatively identified as Propanoic acid, 2-methyl-, 2-ethyl-3-hydroxyhexyl ester. Head-to-tail comparison of an experimental mass spectrum (top) with a NIST database search hit (bottom) is shown as well as the NIST database entry. The x-axis is  $m/z$  in Th, the y-axis is relative abundance in %, with the most abundant peak at 100%. c) A fragment of chromatograms for EBC samples from three animals side-by-side. This example demonstrates that many peaks are similar between samples, while some are different in either presence or abundance. d) A fragment of chromatogram of EBC from an animal side-by-side with sea water blank; chromatograms are offset for clarity. The majority of the compounds in the breath are not present in the sea water.

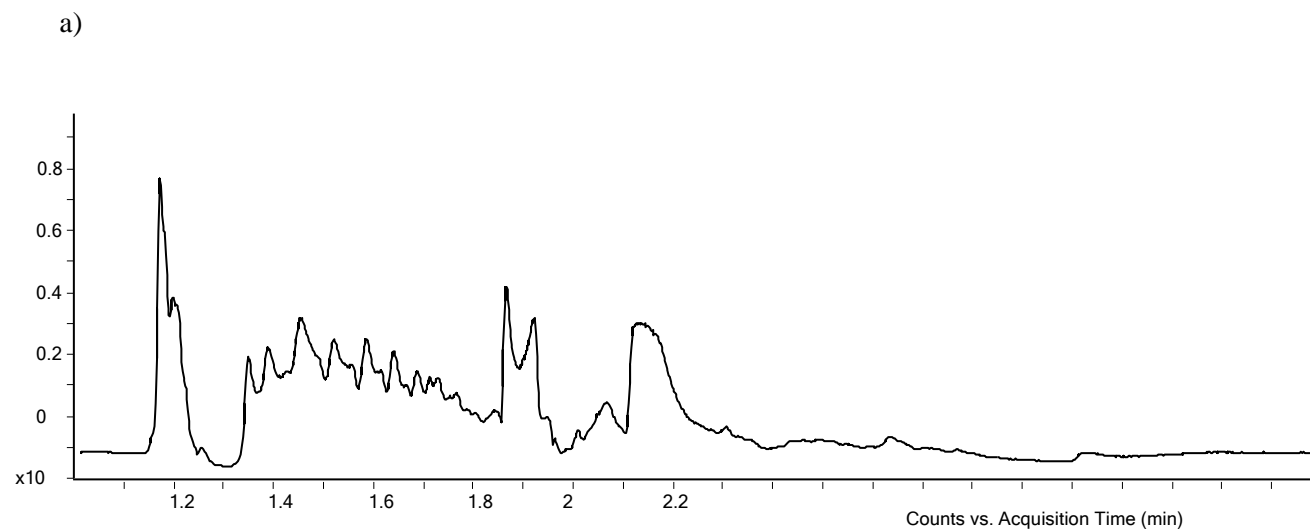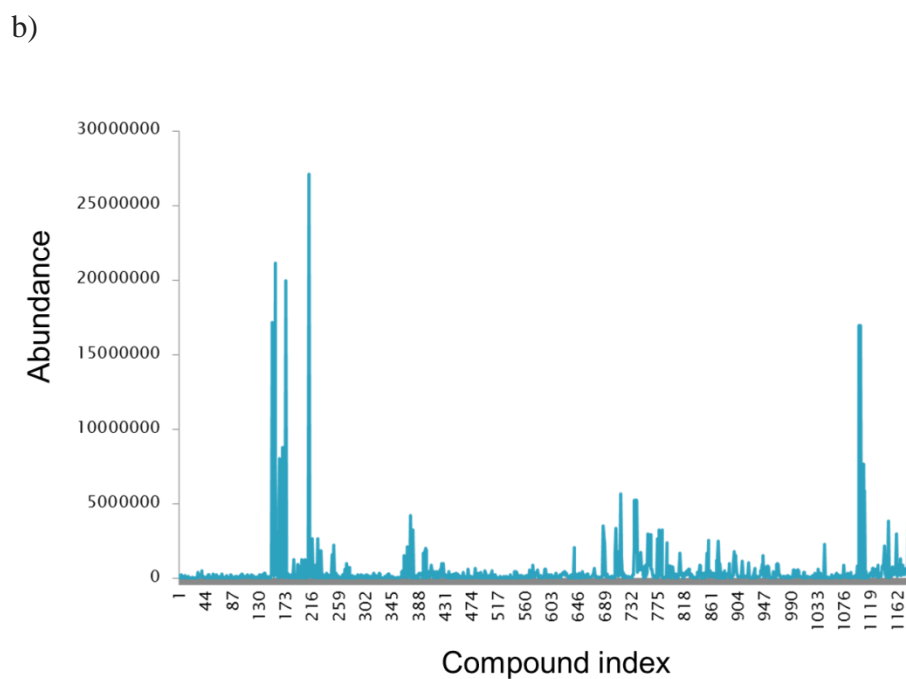

**Figure A2.** Typical results from  $\mu$ HPLC-MS. a) Total Ion Current LC profile. The x-axis is retention time in minutes, the y-axis is relative abundance in a.u. b) Abundances of indexed compounds in the LC/MS experiments. The x-axis is compound index number (a number given to a species identified as a unique compound in order of elution time), the y-axis is relative abundance in a.u.

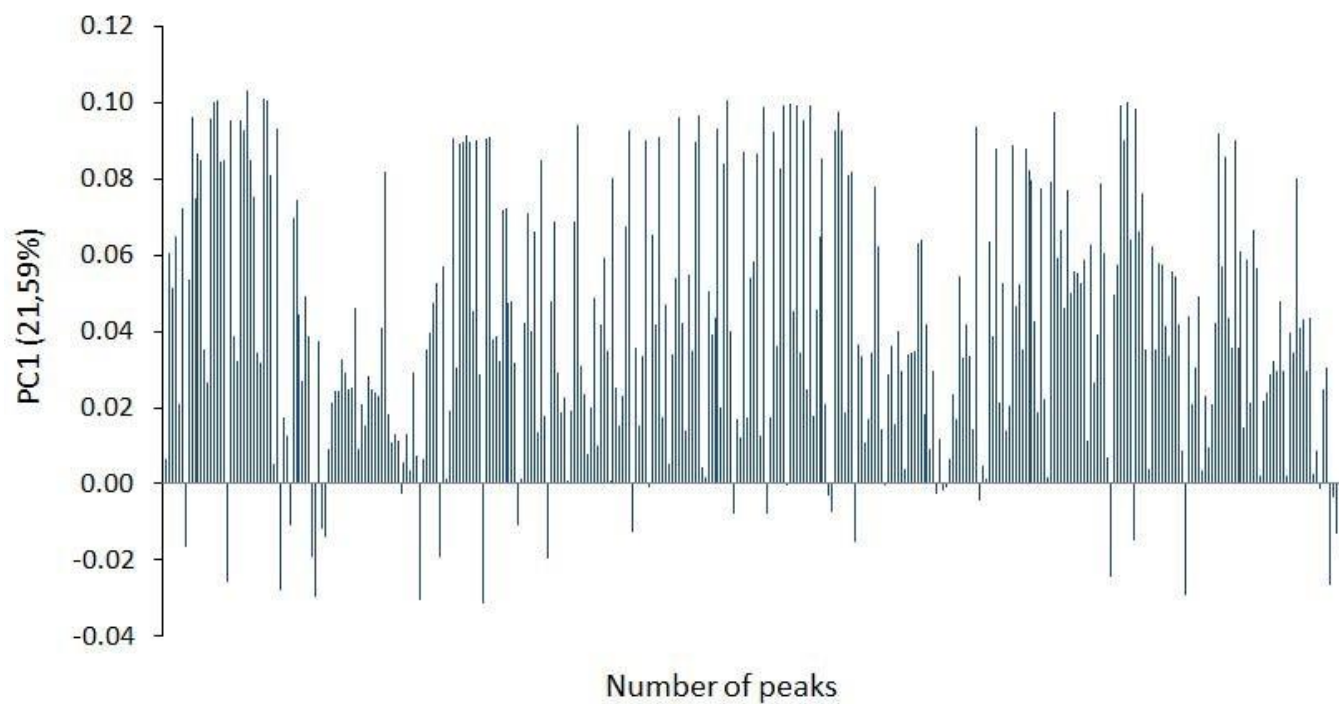

**Figure A3.** Loading plot of Figure 2 in main text. PC1 vs. number of peaks/chemicals.

**Table A1.** Compounds in dolphin breath identified with GC/MS using chemical derivatization.

|                       |                         |
|-----------------------|-------------------------|
| 1-Hexadecanol         | Valine                  |
| Alanine               | Urocanic Acid           |
| Aspartic Acid         | Tyrosine                |
| Benzoic Acid          | Tryptophan              |
| C18:0                 | Threonine               |
| C18:1 Cis6            | Succinic Acid           |
| C9:0                  | Succinate Semialdehyde  |
| Capric Acid           | Stearic Acid            |
| Conduritol B Expoxide | Serine                  |
| Glycerol              | Salicylaldehyde         |
| Glycine               | Phosphoric Acid         |
| Lactic Acid           | Phenylalanine           |
| Lauric Acid           | Pelargonic Acid         |
| Malonic Acid          | Palmitoleic Acid        |
| Methylmalonic Acid    | Oxoproline              |
| N-Methyltryptophane   | Oxalic Acid             |
| Octadecanol           | Ornithine               |
| Oxoproline            | Oleic Acid              |
| Palmitic Acid         | Octadecanol             |
| Pentadecanoic Acid    | Nonadecanoic Acid       |
| Proline               | Myristic Acid           |
| Serine                | Urea                    |
| Sorbose               | Methylhexadecanoic Acid |
| Sucrose               | Mannitol                |
| Tagatose              | Maltose                 |
| Talose                | Malic Acid              |

**Table A2.** Compounds in dolphin breath identified with GC/MS using head space SPME extraction.

Column bleed compounds are excluded. The most likely chemical match is given; alternative structures such as isomers or homologues are possible in some cases, especially for high molecular weight compounds such as those with long chain; some of the compounds that could not be identified are not listed.

\* Compound is likely of exogenous origin

|                                        |                                                                                    |
|----------------------------------------|------------------------------------------------------------------------------------|
| 1,1-Ethandiol, Diacetate               | Tetradecanal                                                                       |
| Octane, 2-Chloro-                      | Heptanoic Acid, 1-Methylethyl Ester                                                |
| 1,3-Butanediol, (R)-                   | Benzene, 1,3-Diisocyanato-2-Methyl-                                                |
| 1-Pentanamine                          | Benzene, 2,4-Diisocyanato-1-Methyl-                                                |
| Oxime-, Methoxy-Phenyl-                | Phenol, 2-(1,1-Dimethylethyl)-4-Methyl-                                            |
| Propanoic Acid, 2-Hydroxyethyl Ester   | Propanoic Acid, 2-Methyl-, 3-Hydroxy-2,4,4-Trimethylpentyl Ester                   |
| Thiazole, Tetrahydro-                  | 1,3-Dioxolane-2-Butanol, 2-Methyl-                                                 |
| 2-Butene-1,4-Diol, Diformate           | Dodecanal                                                                          |
| 1-Octene, 6-Methyl-                    | Nalidixic Acid                                                                     |
| Octanal                                | 2,5-Cyclohexadiene-1,4-Dione, 2,6-Bis(1,1-Dimethylethyl)-                          |
| Ethanol, 2-[2-(2-Ethoxyethoxy)Ethoxy]- | 5-Methoxy-2,2,6-Trimethyl-1-(3-Methyl-Buta-1,3-Dienyl)-7-Oxa-Bicyclo[4.1.0]Heptane |
| Butane, 2-Methoxy-2-Methyl-            | 1-Hepten-4-Ol                                                                      |
| 1-Hexanol, 2-Ethyl-                    | Diphenylmethane                                                                    |
| Butanoic Acid, Propyl Ester            | Butylated Hydroxytoluene                                                           |
| 1-Butanol, 4-(1-Methylethoxy)-         | Bibenzyl                                                                           |
| 2(3H)-Furanone, Dihydro-3-Methyl-      | Phenol, 3,5-Bis(1,1-Dimethylethyl)-                                                |

|                                                                                     |                                                      |
|-------------------------------------------------------------------------------------|------------------------------------------------------|
| Benzene, 1-Isocyanato-4-Methyl-                                                     | 7-Hexadecyn-1-ol                                     |
| 4-Dodecene, (E)-                                                                    | 1-Butanol, 4-(1-Methylethoxy)-                       |
| Benzoic Acid, Methyl Ester                                                          | Benzene, 1-Methyl-3-(Phenylmethyl)-                  |
| 5-Tridecene, (Z)-                                                                   | Phenol, 4,6-Di(1,1-Dimethylethyl)-2-Methyl-          |
| 2-Nonen-1-ol                                                                        | 9H-Pyrido[3,4-B]Indol-7-ol, 1-Methyl-                |
| Glutamine                                                                           | Octadecane, 6-Methyl-                                |
| 2-Pyrrolidinone, 5-(Cyclohexylmethyl)-                                              | Benzene, 1-Methyl-2-(2-Phenylethenyl)-               |
| 1-Butanol, 4-Butoxy-                                                                | Dodecane, 1-Isocyanato-                              |
| 2,2-Dimethyl-N-Ethylpyrrolidine                                                     | Diethyl Phthalate*                                   |
| 2-O-Methyl-D-Mannopyranosa                                                          | 1-Dodecanol, 3,7,11-Trimethyl-                       |
| Cyclohexaneacetic Acid                                                              | 1-(3-(Cyclohexylamino)Propyl)Guanidine               |
| Benzoic Acid                                                                        | 3-Ethyl-5-Methylindolizidine                         |
| Ethanol, 2-(2-Ethoxyethoxy)-, Acetate                                               | Benzophenone                                         |
| 1-Tridecanol                                                                        | 2,6-Bis(1,1-Dimethylethyl)-4-(1-Oxopropyl)Phenol     |
| 2h-Pyran, Tetrahydro-2-(1-Methylethoxy)-                                            | Phenol, 2,4,6-Tris(1-Methylethyl)-                   |
| 2-Hexenoic Acid, 3,4,4-Trimethyl-5-Oxo-, (Z)-                                       | 5-Methyl-4,5-Dihydro-1h-Pyrrolo[3,2-c]Quinolin-4-One |
| 1,10-Decanediol                                                                     | Undecane                                             |
| 2(3H)-Furanone, Dihydro-5-Pentyl-                                                   | 1H-Indazole, 4,5,6,7-Tetrahydro-                     |
| Mequinol                                                                            | 7-Ethoxy-8-Methoxy-2,2-Dimethyl-2H-Chromene          |
| Cyclohexanone, 2-Propyl-                                                            | Benzyl Benzoate                                      |
| Cyclohexanol, 1r-4cis-Acetamido-5,6cis-Epoxy-2trans,3cis-Dimethoxy-                 | Benzoic Acid, 2-Hydroxy-, Pentyl Ester               |
| Methyl Pyrrole-2-Carboxylate                                                        | 4-Heptenal, 6-(Acetyloxy)-4-Methyl-, (E)-            |
| Ethanol, 2-(Octadecyloxy)-                                                          | 4-(2-Propen-1-yloxy)Benzeneamine                     |
| 2-Propenoic Acid, Oxybis(2,1-Ethanedioxy-2,1-Ethanediyloxy-2,1-Ethanediyloxy) Ester | Homosalate                                           |
| 1-Penten-3-ol, 3-Methyl-                                                            | 1,1-Dimethyldihydrobenzofuran-5-ol                   |
| Acetic Acid, Ethyl Ester                                                            | 2,4-Hexadiene                                        |
| 2-Pentanone, 4-Methyl-                                                              | Hexanal                                              |
| Benzene, 1,2-Dimethyl-                                                              | Styrene*                                             |
| 1-Formylcyclopentene                                                                | 2-Hexanone, 5-Methyl-                                |
| Heptanal                                                                            | Oxime-, Methoxy-Phenyl-                              |
| Benzaldehyde                                                                        | 2-Propanol, 1,1,1-Trichloro-2-Methyl-                |
| Benzonitrile                                                                        | 6-Methyl-5-Hepten-2-One                              |
| 1,8-Cineole                                                                         | Octanal                                              |
| 3-Cyclohexene-1-Carboxaldehyde                                                      | Benzene, 1-Methyl-2-(1-Methylethyl)-                 |
| Cyclohexene, 1-Methyl-4-(1-Methylethenyl)-                                          | 1-Hexanol, 2-Ethyl-*                                 |
| Cyclohexanol, 3,3,5-Trimethyl-                                                      | 1,2-Diphenylpropanone                                |
| Benzaldehyde, 3-Methyl-                                                             | 1-Tridecyne                                          |
| 1-Octanol                                                                           | Benzene, 1-Methyl-4-(1-Methylethenyl)-               |
| 3-Cyclohexen-1-ol, 4-Methyl-1-(1-Methylethyl)-                                      | Pyridine, 4-Methoxy-                                 |
| 2-Nonen-1-ol                                                                        | 1,1-Dimethyl-3-Methylidene-2-Vinylcyclohexane        |
| Benzene, 1-Isocyano-2-Methyl-                                                       | Acetic Acid, 2-Ethylhexyl Ester                      |
| Nonenal                                                                             | Naphthalene                                          |
| 3,4-Dimethylcyclohexanol                                                            | Nonanol                                              |
| Glyoxal, 4-Methylphenyl-                                                            | Cycloocta-1,3,6-Triene, 2,3,5,5,8,8-Hexamethyl-      |
| Hydroxylamine, O-Decyl-                                                             | 7-Decen-1-Al                                         |
| 3,9-Dodecadiyne                                                                     | 1,10-Decanediol                                      |

|                                                                           |                                                                                    |
|---------------------------------------------------------------------------|------------------------------------------------------------------------------------|
| 6-Methyl-1,2,3,5,8,8a-Hexahydronaphthalene                                | Cyclohexane, 1-Bromo-3-Methyl-                                                     |
| 2-Decenal                                                                 | Nonanoic Acid                                                                      |
| 1-Heptadecyne                                                             | 1-Octadecyne                                                                       |
| Alpha-Ionol                                                               | Oxalic Acid, Isobutyl Nonyl Ester                                                  |
| 1,3-Isobenzofurandione*                                                   | Pentadecanal                                                                       |
| (1rs,2rs,7rs)-1,2,6,6-Tetramethyl-10-Oxatricyclo[5.2.1.0(2,7)]Decan-3-One | Propanoic Acid, 2-Methyl-, 3-Hydroxy-2,4,4-Trimethylpentyl Ester                   |
| 10-Undecenal                                                              | Docosane                                                                           |
| Tetradecane                                                               | Pentadecanal                                                                       |
| 2,4,7,9-Tetramethyl-5-Decyne-4,7-Diol                                     | Decanoic Acid, Ethyl Ester                                                         |
| 5,9-Undecadien-2-One, 6,10-Dimethyl-                                      | 2,5-Cyclohexadiene-1,4-Dione, 2,6-Bis(1,1-Dimethylethyl)-*                         |
| 4-Tridecen-6-Yne                                                          | Nonanoic Acid, 9-Oxo-, Methyl Ester                                                |
| Butyl Hydroxy Anisole                                                     | 1-Heptanol, 2-Propyl-*                                                             |
| 9-Octadecenal                                                             | 5-Hydroxy-8-Methyl-1,2,3,4-Tetrahydro-2-Quinolinone                                |
| Cyclotetradecane                                                          | Hydroxylamine, O-Decyl-                                                            |
| 1,15-Pentadecanediol                                                      | 1,2-Benzenedicarboxylic Acid, Diethyl Ester*                                       |
| Ethyl 1,4,5,6-Tetrahydro-5-Hydroxy-5-Methyl-6-Oxo-2-Pyridinecarboxylate   | 3-Octyn-2-One                                                                      |
| 5-Octen-2-Yn-4-Ol                                                         | Bicyclo[3.1.1]Heptan-3-Ol, 2,6,6-Trimethyl-                                        |
| 1,4,4-Trimethylcyclohexa-2-En-1-Ol                                        | 1-Decanol                                                                          |
| Benzeneacetonitrile                                                       | 1-Cyclohexanol, 1-Vinyl-                                                           |
| Decanal                                                                   | 1-Pentadecyne                                                                      |
| Trans-2-Tridecenal                                                        | Dodecen-1-Al                                                                       |
| Dodecane                                                                  | Dodecane                                                                           |
| Dipentene Oxide                                                           | Tetradecanal                                                                       |
| 8-Hexadecenal, 14-Methyl-,                                                | Heptanoic Acid, 1-Methylethyl Ester                                                |
| 2,6-Di-t-Butyl-4-Methylene-2,5-Cyclohexadiene-1-One*                      | Benzene, 1,3-Diisocyanato-2-Methyl-                                                |
| 1,1-Ethanediol, Diacetate                                                 | Benzene, 2,4-Diisocyanato-1-Methyl-                                                |
| Octane, 2-Chloro-                                                         | Phenol, 2-(1,1-Dimethylethyl)-4-Methyl-                                            |
| 1,3-Butanediol, (R)-                                                      | Propanoic Acid, 2-Methyl-, 3-Hydroxy-2,4,4-Trimethylpentyl Ester                   |
| 1-Pentanamine                                                             | 1,3-Dioxolane-2-Butanol, 2-Methyl-                                                 |
| Oxime-, Methoxy-Phenyl-                                                   | Dodecanal                                                                          |
| Propanoic Acid, 2-Hydroxyethyl Ester                                      | Nalidixic Acid                                                                     |
| Thiazole, Tetrahydro-                                                     | 2,5-Cyclohexadiene-1,4-Dione, 2,6-Bis(1,1-Dimethylethyl)-                          |
| 2-Butene-1,4-Diol, Diformate                                              | 5-Methoxy-2,2,6-Trimethyl-1-(3-Methyl-Buta-1,3-Dienyl)-7-Oxa-Bicyclo[4.1.0]Heptane |
| 1-Octene, 6-Methyl-                                                       | 1-Hepten-4-Ol                                                                      |
| Octanal                                                                   | Diphenylmethane                                                                    |
| Ethanol, 2-[2-(2-Ethoxyethoxy)Ethoxy]-                                    | Butylated Hydroxytoluene                                                           |
| Butane, 2-Methoxy-2-Methyl-                                               | Bibenzyl                                                                           |
| 1-Hexanol, 2-Ethyl-                                                       | Phenol, 3,5-Bis(1,1-Dimethylethyl)-                                                |
| Butanoic Acid, Propyl Ester                                               | 7-Hexadecyn-1-Ol                                                                   |
| 1-Butanol, 4-(1-Methylethoxy)-                                            | 1-Butanol, 4-(1-Methylethoxy)-                                                     |
| 2(3H)-Furanone, Dihydro-3-Methyl-                                         | Benzene, 1-Methyl-3-(Phenylmethyl)-                                                |
| Benzene, 1-Isocyanato-4-Methyl-                                           | Phenol, 4,6-Di(1,1-Dimethylethyl)-2-Methyl-                                        |
| 4-Dodecene, (E)-                                                          | 9H-Pyrido[3,4-B]Indol-7-Ol, 1-Methyl-                                              |

|                                        |                                        |
|----------------------------------------|----------------------------------------|
| Benzoic Acid, Methyl Ester             | Octadecane, 6-Methyl-                  |
| 5-Tridecene, (Z)-                      | Benzene, 1-Methyl-2-(2-Phenylethenyl)- |
| 2-Nonen-1-Ol                           | Dodecane, 1-Isocyanato-                |
| Glutamine                              | Diethyl Phthalate*                     |
| 2-Pyrrolidinone, 5-(Cyclohexylmethyl)- | 1-Dodecanol, 3,7,11-Trimethyl-         |
| 1-Butanol, 4-Butoxy-                   | 1-(3-(Cyclohexylamino)Propyl)Guanidine |
| 2,2-Dimethyl-N-Ethylpyrrolidine        | 3-Ethyl-5-Methylindolizidine           |
| 2-O-Methyl-D-Mannopyranosa             | Benzophenone                           |
| 1-Cyclohexaneacetic Acid               | Benzophenone                           |
| Benzoic Acid                           | Ethanol, 2-(2-Ethoxyethoxy)-, Acetate  |

**Table A3.** List of volatile metabolites (GC/MS) detected in sea water (column bleed compounds excluded). The most likely chemical match is given; alternative structures such as isomers or homologues are possible in some cases, especially for long-chain compounds.

|                                                                  |                                      |
|------------------------------------------------------------------|--------------------------------------|
| Oxime-, Methoxy-Phenyl-                                          | Benzaldehyde                         |
| 3-Nonen-1-Ol                                                     | 1-Hexanol, 2-Ethyl-                  |
| Ethanone, 2,2-Dihydroxy-1-Phenyl-                                | Benzene, (2-Methyl-1-Propenyl)-      |
| Dodecanal                                                        | Decanol                              |
| Undecanol                                                        | Octane                               |
| Tetradecanal                                                     | Benzothiazole                        |
| Isooctanol                                                       | 1-Phenoxypropan-2-Ol                 |
| Phthalic Anhydride                                               | Pentadecanal                         |
| Selinan                                                          | 2-Hexanone, 6-Hydroxy-               |
| Propanoic Acid, 2-Methyl-, 3-Hydroxy-2,4,4-Trimethylpentyl Ester | Pentadecane                          |
| Cyclodecanol                                                     | Phenol, 3,4-Dimethoxy-, Acetate      |
| 4-Ethylbenzoic Acid, Phenyl Ester                                | 5,9-Undecadien-2-One, 6,10-Dimethyl- |
| 2,5-Cyclohexadiene-1,4-Dione, 2,6-Bis(1,1-Dimethylethyl)-        | Oleic Acid                           |
| (3-Ethoxy-Hexa-1,5-Dienyl)-Benzene                               | Tridecane                            |
| 2-Allyl-5-t-Butylhydroquinone                                    | Diethyl Phthalate                    |
| Decane, 6-Ethyl-2-Methyl-                                        |                                      |

**Table A4.** List of volatile metabolites (GC/MS) in air condensate (column bleed compounds excluded and blank peaks excluded). The most likely chemical match is given; alternative structures such as isomers or homologues may be possible in some cases.

|                                   |                                      |
|-----------------------------------|--------------------------------------|
| Hexanal                           | Alpha-Methylstyrene                  |
| 5-Hepten-2-One, 6-Methyl-         | Octanal                              |
| 2,6-Dimethyl-1,3,5,7-Octatetraene | Benzene, 1-Methyl-3-(1-Methylethyl)- |
| Linalool                          | Camphene                             |
| Carvone                           | Dodecanal                            |

**Table A5.** List of non-volatile metabolites (LC/MS) for managed population animals. Sample was pooled from multiple animals (collection in May 2011). Experiment was conducted using HILIC column in positive ion mode (refer to Materials and Methods section). Only top match is given for each compound.

| Parent m/z | Mass    | Delta (m/z) | Library Precursor m/z | Match Score | Probability (%) | Chem ID                                     |
|------------|---------|-------------|-----------------------|-------------|-----------------|---------------------------------------------|
| 170.1278   | 187.121 | -0.0102     | 170.1176              | 417         | 76              | 7-Keto-8-Aminopelargonic Acid               |
| 472.2733   | 471.314 | 0.048       | 472.321               | 99          | 61.1            | Terfenadine                                 |
| 516.3059   | 515.292 | -0.007      | 516.2989              | 105         | 100             | Taurocholic Acid                            |
| 170.1278   | 187.121 | -0.0102     | 170.1176              | 451         | 72.6            | 7-Keto-8-Aminopelargonic Acid               |
| 370.2514   | 369.288 | 0.0438      | 370.2952              | 191         | 35              | N-Oleoyl-L-Serine                           |
| 170.1278   | 187.121 | -0.0102     | 170.1176              | 383         | 75.9            | 7-Keto-8-Aminopelargonic Acid               |
| 400.319    | 400.343 | 0.0231      | 400.3421              | 94          | 12.6            | Palmitoyl-L-Carnitine Cation                |
| 472.2733   | 471.314 | 0.048       | 472.321               | 134         | 80.3            | Terfenadine                                 |
| 170.1278   | 187.121 | -0.0102     | 170.1176              | 405         | 73.6            | 7-Keto-8-Aminopelargonic Acid               |
| 370.2514   | 369.288 | 0.0438      | 370.2952              | 248         | 27.8            | N-Oleoyl-L-Serine                           |
| 461.2907   | 460.28  | -0.0036     | 461.2871              | 33          | 100             | Trp-Lys-Lys                                 |
| 655.4719   | 654.492 | 0.0272      | 655.4991              | 194         | 51.2            | Deca(Propylene Glycol) Monobutyl Ether      |
| 474.2957   | 473.275 | -0.0134     | 474.2823              | 56          | 20.6            | Leu-Trp-Arg                                 |
| 458.3162   | 435.281 | -0.0463     | 458.2699              | 63          | 100             | N-Acetyl-S-Geranylgeranyl-L-Cysteine        |
| 472.2733   | 471.314 | 0.048       | 472.321               | 86          | 100             | Terfenadine                                 |
| 170.116    | 187.121 | 0.0016      | 170.1176              | 408         | 78.4            | 7-Keto-8-Aminopelargonic Acid               |
| 472.2733   | 471.223 | -0.043      | 472.2303              | 83          | 100             | Pyroglu-Trp-Arg                             |
| 414.278    | 449.314 | 0.0223      | 414.3003              | 241         | 97.3            | Glycodeoxycholic Acid                       |
| 472.2733   | 471.314 | 0.048       | 472.321               | 139         | 89.1            | Terfenadine                                 |
| 170.1278   | 187.121 | -0.0102     | 170.1176              | 439         | 77              | 7-Keto-8-Aminopelargonic Acid               |
| 400.319    | 400.343 | 0.0231      | 400.3421              | 197         | 19.9            | Palmitoyl-L-Carnitine Cation                |
| 414.278    | 449.314 | 0.0223      | 414.3003              | 306         | 99              | Glycodeoxycholic Acid                       |
| 472.3027   | 471.314 | 0.018       | 472.321               | 148         | 100             | Terfenadine                                 |
| 391.2842   | 390.277 | 0.0001      | 391.2843              | 115         | 54.1            | Bis(2-Ethylhexyl) Phthalate                 |
| 170.1278   | 169.074 | -0.0466     | 170.0812              | 244         | 39.5            | DL-Norepinephrine                           |
| 419.3154   | 418.308 | 0.0002      | 419.3156              | 205         | 100             | 1,2-Benzenedicarboxylic Acid, Dinonyl Ester |
| 149.0229   | 166.027 | 0.0004      | 149.0233              | 440         | 98.6            | 1,2-Benzenedicarboxylic Acid                |
| 343.2918   | 342.256 | -0.0286     | 343.2632              | 301         | 95.4            | Retinyl Propionate                          |
| 170.1383   | 169.085 | -0.0459     | 170.0924              | 248         | 31.8            | L-Histidine, 3-Methyl-                      |
| 391.2842   | 390.277 | 0.0001      | 391.2843              | 103         | 52.2            | Bis(2-Ethylhexyl) Phthalate                 |
| 399.251    | 398.243 | -0.0004     | 399.2506              | 174         | 100             | Tris(Butoxyethyl) Phosphate                 |
| 472.3317   | 471.314 | -0.011      | 472.321               | 164         | 100             | Terfenadine                                 |
| 516.3458   | 515.292 | -0.0469     | 516.2989              | 282         | 100             | Taurocholic Acid                            |



|          |         |         |          |     |      |                                                      |
|----------|---------|---------|----------|-----|------|------------------------------------------------------|
| 516.3458 | 515.292 | -0.0469 | 516.2989 | 212 | 100  | Taurocholic Acid                                     |
| 387.1816 | 193.074 | -0.0265 | 387.1551 | 172 | 26.2 | Hippuric Acid, Methyl Ester                          |
| 404.2057 | 403.254 | 0.0559  | 404.2616 | 6   | 26.3 | Arg-Thr-Lys                                          |
| 474.2957 | 473.275 | -0.0134 | 474.2823 | 76  | 100  | Leu-Trp-Arg                                          |
| 472.3317 | 471.314 | -0.011  | 472.321  | 164 | 100  | Terfenadine                                          |
| 170.1278 | 169.085 | -0.0354 | 170.0924 | 376 | 38.1 | L-Histidine, 3-Methyl-                               |
| 655.4719 | 654.492 | 0.0272  | 655.4991 | 252 | 19.9 | Deca(Propylene Glycol)<br>Monobutyl Ether            |
| 170.1278 | 169.085 | -0.0354 | 170.0924 | 423 | 56   | L-Histidine, 3-Methyl-                               |
| 279.0936 | 278.086 | -0.0002 | 279.0933 | 11  | 100  | Triphenylphosphine Oxide                             |
| 516.3458 | 515.292 | -0.0469 | 516.2989 | 161 | 100  | Taurocholic Acid                                     |
| 655.4533 | 654.492 | 0.0458  | 655.4991 | 304 | 22.1 | Deca(Propylene Glycol)<br>Monobutyl Ether            |
| 288.2533 | 287.196 | -0.05   | 288.203  | 105 | 26.1 | Leu-Arg                                              |
| 472.3317 | 471.314 | -0.011  | 472.321  | 118 | 100  | Terfenadine                                          |
| 170.1278 | 169.085 | -0.0354 | 170.0924 | 294 | 43   | L-Histidine, 1-Methyl-                               |
| 496.4192 | 495.369 | -0.043  | 496.3762 | 167 | 100  | 2-O-Methyl PAF C-16                                  |
| 655.5042 | 654.492 | -0.0051 | 655.4991 | 289 | 19.2 | Deca(Propylene Glycol)<br>Monobutyl Ether            |
| 695.4768 | 695     | 0.04    | 695.52   | 85  | 50   | DG 42:10; [M+Li] <sup>+</sup> ;<br>DG(20:5/22:5/0:0) |
| 516.3458 | 515.292 | -0.0469 | 516.2989 | 197 | 100  | Taurocholic Acid                                     |
| 472.3317 | 471.314 | -0.011  | 472.321  | 190 | 100  | Terfenadine                                          |
| 414.278  | 413.239 | -0.0321 | 414.2459 | 176 | 69.2 | Pyroglu-Arg-Lys                                      |
| 516.3458 | 515.292 | -0.0469 | 516.2989 | 169 | 100  | Taurocholic Acid                                     |
| 170.116  | 187.121 | 0.0016  | 170.1176 | 386 | 45.1 | 7-Keto-8-Aminopelargonic<br>Acid                     |
| 472.3317 | 471.314 | -0.011  | 472.321  | 216 | 100  | Terfenadine                                          |
| 461.2907 | 460.243 | -0.04   | 461.2507 | 87  | 80.4 | Trp-Gln-Lys                                          |
| 516.3458 | 515.292 | -0.0469 | 516.2989 | 282 | 100  | Taurocholic Acid                                     |
| 170.116  | 169.085 | -0.0236 | 170.0924 | 420 | 38.9 | L-Histidine, 1-Methyl-                               |
| 370.2514 | 369.288 | 0.0438  | 370.2952 | 302 | 26.5 | N-Oleoyl-L-Serine                                    |
| 516.3458 | 515.292 | -0.0469 | 516.2989 | 229 | 100  | Taurocholic Acid                                     |
| 170.1132 | 187.121 | 0.0044  | 170.1176 | 403 | 54.8 | 7-Keto-8-Aminopelargonic<br>Acid                     |
| 414.278  | 449.314 | 0.0223  | 414.3003 | 238 | 88.8 | Glycodeoxycholic Acid                                |
| 370.2514 | 369.288 | 0.0438  | 370.2952 | 93  | 9.3  | N-Oleoyl-L-Serine                                    |
| 461.2907 | 460.243 | -0.04   | 461.2507 | 108 | 85.2 | Trp-Gln-Lys                                          |
| 516.3458 | 515.292 | -0.0469 | 516.2989 | 240 | 100  | Taurocholic Acid                                     |
| 474.2738 | 473.275 | 0.0085  | 474.2823 | 19  | 57.9 | Leu-Trp-Arg                                          |
| 151.0962 | 150.089 | 0.0003  | 151.0965 | 238 | 100  | Triethylene Glycol                                   |
| 414.278  | 449.314 | 0.0223  | 414.3003 | 291 | 92.4 | Glycodeoxycholic Acid                                |
| 370.2514 | 369.288 | 0.0438  | 370.2952 | 204 | 18   | N-Oleoyl-L-Serine                                    |
| 516.3458 | 515.292 | -0.0469 | 516.2989 | 191 | 100  | Taurocholic Acid                                     |
| 474.2738 | 473.275 | 0.0085  | 474.2823 | 33  | 20.6 | Ile-Trp-Arg                                          |
| 461.2907 | 460.243 | -0.04   | 461.2507 | 124 | 23.9 | Trp-Gln-Lys                                          |
| 474.2957 | 473.275 | -0.0134 | 474.2823 | 70  | 33.4 | Leu-Trp-Arg                                          |
| 370.2514 | 369.288 | 0.0438  | 370.2952 | 121 | 10.1 | N-Oleoyl-L-Serine                                    |

|          |         |         |          |     |      |                                                                         |
|----------|---------|---------|----------|-----|------|-------------------------------------------------------------------------|
| 461.2907 | 460.243 | -0.04   | 461.2507 | 91  | 22.7 | Trp-Gln-Lys                                                             |
| 474.2738 | 473.275 | 0.0085  | 474.2823 | 106 | 35.6 | Leu-Trp-Arg                                                             |
| 458.2953 | 457.244 | -0.044  | 458.251  | 54  | 32.9 | Pro-Trp-Arg                                                             |
| 244.1905 | 226.193 | 0.0366  | 244.2271 | 483 | 98.5 | 2,4,7,9-Tetramethyl-5-Decyne-4,7-Diol                                   |
| 472.3027 | 471.314 | 0.018   | 472.321  | 174 | 100  | Terfenadine                                                             |
| 370.238  | 370     | -0.03   | 370.21   | 121 | 50   | MGDG 7:0; [M+NH <sub>4</sub> -CO] <sup>+</sup> ; MGDG(2:0/5:0)          |
| 422.2569 | 421.233 | -0.0171 | 422.2398 | 56  | 53.1 | Phe-Gln-Lys                                                             |
| 474.2957 | 473.275 | -0.0134 | 474.2823 | 28  | 35   | Leu-Trp-Arg                                                             |
| 370.2514 | 370     | -0.04   | 370.21   | 70  | 21.8 | MGDG 7:0; [M+NH <sub>4</sub> -CO] <sup>+</sup> ; MGDG(2:0/5:0)          |
| 414.278  | 413.239 | -0.0321 | 414.2459 | 75  | 54.2 | Pyroglu-Lys-Arg                                                         |
| 370.2514 | 369.288 | 0.0438  | 370.2952 | 115 | 13.5 | N-Oleoyl-L-Serine                                                       |
| 170.116  | 187.121 | 0.0016  | 170.1176 | 273 | 59.3 | 7-Keto-8-Aminopelargonic Acid                                           |
| 239.1485 | 238.099 | -0.042  | 239.106  | 58  | 100  | 4-(2-Hydroxyethyl)Piperazine-1-Ethanesulfonic Acid                      |
| 370.2514 | 369.288 | 0.0438  | 370.2952 | 176 | 21.2 | N-Oleoyl-L-Serine                                                       |
| 414.278  | 449.314 | 0.0223  | 414.3003 | 52  | 100  | Glycodeoxycholic Acid                                                   |
| 139.0499 | 138.043 | 0.0003  | 139.0502 | 548 | 83.8 | 4-Imidazoleacrylic Acid                                                 |
| 638.6063 | 638     | -0.04   | 638.57   | 133 | 29.3 | DG 36:2; [M+NH <sub>4</sub> ] <sup>+</sup> ; DG(14:1/22:1/0:0)          |
| 239.1485 | 238.099 | -0.042  | 239.106  | 43  | 100  | 4-(2-Hydroxyethyl)Piperazine-1-Ethanesulfonic Acid                      |
| 472.2733 | 471.314 | 0.048   | 472.321  | 160 | 93.1 | Terfenadine                                                             |
| 370.2514 | 369.288 | 0.0438  | 370.2952 | 290 | 23   | N-Oleoyl-L-Serine                                                       |
| 474.2957 | 473.275 | -0.0134 | 474.2823 | 69  | 44.6 | Ile-Trp-Arg                                                             |
| 516.3059 | 515.292 | -0.007  | 516.2989 | 87  | 100  | Taurocholic Acid                                                        |
| 458.3162 | 435.281 | -0.0463 | 458.2699 | 50  | 100  | N-Acetyl-S-Geranylgeranyl-L-Cysteine                                    |
| 474.2957 | 473.275 | -0.0134 | 474.2823 | 35  | 100  | Ile-Trp-Arg                                                             |
| 400.319  | 400.343 | 0.0231  | 400.3421 | 76  | 26.1 | Palmitoyl-L-Carnitine Cation                                            |
| 787.6526 | 786.661 | 0.0162  | 787.6688 | 102 | 100  | N-Docosanoyl-4-Sphinganyl-1-O-Phosphorylcholine                         |
| 170.1132 | 187.121 | 0.0044  | 170.1176 | 255 | 62.8 | 7-Keto-8-Aminopelargonic Acid                                           |
| 655.4719 | 654.492 | 0.0272  | 655.4991 | 281 | 27.4 | Deca(Propylene Glycol) Monobutyl Ether                                  |
| 548.3399 | 548     | 0.04    | 548.38   | 149 | 8.3  | MGDG 20:2; [M+NH <sub>4</sub> -CO] <sup>+</sup> ; MGDG(2:0/18:2(2E,4E)) |
| 170.116  | 187.121 | 0.0016  | 170.1176 | 15  | 100  | 7-Keto-8-Aminopelargonic Acid                                           |
| 170.116  | 169.085 | -0.0236 | 170.0924 | 35  | 59.3 | L-Histidine, 1-Methyl-                                                  |
| 170.116  | 169.074 | -0.0348 | 170.0812 | 147 | 49.1 | DL-Norepinephrine                                                       |
| 343.31   | 342.256 | -0.0468 | 343.2632 | 174 | 100  | Retinyl Propionate                                                      |

|          |         |         |          |     |      |                                                |
|----------|---------|---------|----------|-----|------|------------------------------------------------|
| 170.116  | 187.121 | 0.0016  | 170.1176 | 93  | 47.9 | 7-Keto-8-Aminopelargonic Acid                  |
| 655.4533 | 654.492 | 0.0458  | 655.4991 | 250 | 29.8 | Deca(Propylene Glycol) Monobutyl Ether         |
| 170.116  | 187.121 | 0.0016  | 170.1176 | 84  | 45.7 | 7-Keto-8-Aminopelargonic Acid                  |
| 400.319  | 400.343 | 0.0231  | 400.3421 | 72  | 41.1 | Palmitoyl-L-Carnitine Cation                   |
| 655.4719 | 654.492 | 0.0272  | 655.4991 | 224 | 24.9 | Deca(Propylene Glycol) Monobutyl Ether         |
| 170.116  | 187.121 | 0.0016  | 170.1176 | 148 | 52.6 | 7-Keto-8-Aminopelargonic Acid                  |
| 461.2907 | 460.243 | -0.04   | 461.2507 | 42  | 57.3 | Gln-Trp-Lys                                    |
| 400.319  | 400.343 | 0.0231  | 400.3421 | 51  | 15.8 | Palmitoyl-L-Carnitine Cation                   |
| 461.2907 | 460.28  | -0.0036 | 461.2871 | 41  | 100  | Trp-Lys-Lys                                    |
| 170.1446 | 187.121 | -0.027  | 170.1176 | 285 | 56.5 | 7-Keto-8-Aminopelargonic Acid                  |
| 461.2907 | 230.163 | 0.0427  | 461.3334 | 295 | 59.8 | Val-Leu                                        |
| 461.2907 | 230.163 | 0.0427  | 461.3334 | 269 | 59.8 | Val-Leu                                        |
| 170.1278 | 187.121 | -0.0102 | 170.1176 | 192 | 47.6 | 7-Keto-8-Aminopelargonic Acid                  |
| 655.4533 | 654.492 | 0.0458  | 655.4991 | 109 | 37   | Deca(Propylene Glycol) Monobutyl Ether         |
| 343.2918 | 342.256 | -0.0286 | 343.2632 | 110 | 100  | Retinyl Propionate                             |
| 461.2907 | 230.163 | 0.0427  | 461.3334 | 274 | 58.4 | Val-Leu                                        |
| 787.6804 | 786.661 | -0.0116 | 787.6688 | 70  | 39.7 | N-Docosanoyl-4-Sphingeny-1-O-Phosphorylcholine |
| 170.1278 | 169     | -0.04   | 170.09   | 275 | 36   | 3-Methyl-L-Histidine                           |
| 655.4719 | 654.492 | 0.0272  | 655.4991 | 105 | 38.5 | Deca(Propylene Glycol) Monobutyl Ether         |
| 343.2918 | 342.256 | -0.0286 | 343.2632 | 53  | 77.9 | Retinyl Propionate                             |
| 787.6377 | 786.661 | 0.0311  | 787.6688 | 73  | 100  | N-Docosanoyl-4-Sphingeny-1-O-Phosphorylcholine |
| 170.1278 | 187.121 | -0.0102 | 170.1176 | 163 | 54   | 7-Keto-8-Aminopelargonic Acid                  |
| 400.319  | 400.343 | 0.0231  | 400.3421 | 187 | 9.1  | Palmitoyl-L-Carnitine Cation                   |
| 787.6526 | 786.661 | 0.0162  | 787.6688 | 37  | 38.7 | N-Docosanoyl-4-Sphingeny-1-O-Phosphorylcholine |
| 170.1278 | 169.085 | -0.0354 | 170.0924 | 229 | 32.7 | L-Histidine, 1-Methyl-                         |
| 474.2957 | 473.275 | -0.0134 | 474.2823 | 31  | 100  | Ile-Trp-Arg                                    |
| 474.2957 | 473.275 | -0.0134 | 474.2823 | 64  | 54   | Ile-Trp-Arg                                    |
| 474.2957 | 473.275 | -0.0134 | 474.2823 | 47  | 53.1 | Leu-Trp-Arg                                    |
| 458.3162 | 435.281 | -0.0463 | 458.2699 | 78  | 100  | N-Acetyl-S-Geranylgeranyl-L-Cysteine           |
| 474.2957 | 473.275 | -0.0134 | 474.2823 | 66  | 45.2 | Trp-Ile-Arg                                    |
| 474.2957 | 473.275 | -0.0134 | 474.2823 | 54  | 59.7 | Leu-Trp-Arg                                    |
| 474.2957 | 473.275 | -0.0134 | 474.2823 | 74  | 30.4 | Trp-Ile-Arg                                    |

|          |         |         |          |     |      |                                            |
|----------|---------|---------|----------|-----|------|--------------------------------------------|
| 474.2957 | 473.275 | -0.0134 | 474.2823 | 52  | 20.6 | Leu-Trp-Arg                                |
| 474.2957 | 473.275 | -0.0134 | 474.2823 | 54  | 28.9 | Trp-Ile-Arg                                |
| 518.3145 | 495.332 | 0.0072  | 518.3217 | 91  | 100  | 1-Hexadecanoyl-Sn-Glycero-3-Phosphocholine |
| 474.2957 | 473.275 | -0.0134 | 474.2823 | 52  | 31.8 | Trp-Ile-Arg                                |
| 474.2957 | 473.275 | -0.0134 | 474.2823 | 81  | 27.4 | Leu-Trp-Arg                                |
| 400.319  | 400.343 | 0.0231  | 400.3421 | 65  | 47.4 | Palmitoyl-L-Carnitine Cation               |
| 170.1278 | 187.121 | -0.0102 | 170.1176 | 31  | 38.4 | 7-Keto-8-Aminopelargonic Acid              |
| 474.2957 | 473.275 | -0.0134 | 474.2823 | 45  | 21.2 | Leu-Trp-Arg                                |
| 400.319  | 400.343 | 0.0231  | 400.3421 | 58  | 47   | Palmitoyl-L-Carnitine Cation               |
| 474.2957 | 473.275 | -0.0134 | 474.2823 | 60  | 40.9 | Leu-Trp-Arg                                |
| 474.2957 | 473.275 | -0.0134 | 474.2823 | 31  | 22.9 | Trp-Ile-Arg                                |
| 170.1278 | 187.121 | -0.0102 | 170.1176 | 141 | 43.2 | 7-Keto-8-Aminopelargonic Acid              |
| 170.1278 | 187.121 | -0.0102 | 170.1176 | 128 | 45.7 | 7-Keto-8-Aminopelargonic Acid              |
| 170.1278 | 187.121 | -0.0102 | 170.1176 | 95  | 39.8 | 7-Keto-8-Aminopelargonic Acid              |
| 414.278  | 449.314 | 0.0223  | 414.3003 | 66  | 100  | Glycodeoxycholic Acid                      |
| 474.2738 | 473.275 | 0.0085  | 474.2823 | 34  | 57.3 | Trp-Ile-Arg                                |
| 474.2957 | 473.275 | -0.0134 | 474.2823 | 77  | 76.9 | Trp-Ile-Arg                                |
| 170.1278 | 187.121 | -0.0102 | 170.1176 | 151 | 72   | 7-Keto-8-Aminopelargonic Acid              |
| 170.1278 | 187.121 | -0.0102 | 170.1176 | 136 | 46.6 | 7-Keto-8-Aminopelargonic Acid              |
| 474.2738 | 473.275 | 0.0085  | 474.2823 | 110 | 71.5 | Trp-Ile-Arg                                |
| 170.1278 | 187.121 | -0.0102 | 170.1176 | 173 | 51   | 7-Keto-8-Aminopelargonic Acid              |
| 458.3162 | 435.281 | -0.0463 | 458.2699 | 102 | 100  | N-Acetyl-S-Geranylgeranyl-L-Cysteine       |
| 170.1278 | 187.121 | -0.0102 | 170.1176 | 142 | 45.7 | 7-Keto-8-Aminopelargonic Acid              |
| 474.2957 | 473.275 | -0.0134 | 474.2823 | 44  | 57.9 | Ile-Trp-Arg                                |
| 458.2757 | 435.281 | -0.0058 | 458.2699 | 101 | 100  | N-Acetyl-S-Geranylgeranyl-L-Cysteine       |
| 400.319  | 400.343 | 0.0231  | 400.3421 | 55  | 80.2 | Palmitoyl-L-Carnitine Cation               |
| 170.1278 | 169.085 | -0.0354 | 170.0924 | 130 | 31.6 | L-Histidine, 1-Methyl-                     |
| 458.3162 | 435.281 | -0.0463 | 458.2699 | 78  | 100  | N-Acetyl-S-Geranylgeranyl-L-Cysteine       |
| 343.2759 | 342.256 | -0.0127 | 343.2632 | 161 | 93.2 | Retinyl Propionate                         |
| 170.1278 | 187.121 | -0.0102 | 170.1176 | 143 | 32.3 | 7-Keto-8-Aminopelargonic Acid              |
| 458.3162 | 435.281 | -0.0463 | 458.2699 | 62  | 100  | N-Acetyl-S-Geranylgeranyl-L-Cysteine       |
| 170.1278 | 187.121 | -0.0102 | 170.1176 | 151 | 30.3 | 7-Keto-8-Aminopelargonic                   |

|          |         |         |          |     |      | Acid                                       |
|----------|---------|---------|----------|-----|------|--------------------------------------------|
| 474.2957 | 473.275 | -0.0134 | 474.2823 | 72  | 100  | Leu-Trp-Arg                                |
| 458.3162 | 435.281 | -0.0463 | 458.2699 | 32  | 100  | N-Acetyl-S-Geranylgeranyl-L-Cysteine       |
| 170.1278 | 187.121 | -0.0102 | 170.1176 | 162 | 45.6 | 7-Keto-8-Aminopelargonic Acid              |
| 400.319  | 401.278 | -0.0485 | 400.2705 | 103 | 100  | Myriocin                                   |
| 170.1278 | 187.121 | -0.0102 | 170.1176 | 148 | 44.6 | 7-Keto-8-Aminopelargonic Acid              |
| 458.2549 | 435.281 | 0.015   | 458.2699 | 69  | 100  | N-Acetyl-S-Geranylgeranyl-L-Cysteine       |
| 170.1278 | 187.121 | -0.0102 | 170.1176 | 143 | 40.2 | 7-Keto-8-Aminopelargonic Acid              |
| 518.3145 | 495.332 | 0.0072  | 518.3217 | 66  | 100  | 1-Hexadecanoyl-Sn-Glycero-3-Phosphocholine |
| 170.1278 | 187.121 | -0.0102 | 170.1176 | 161 | 37.6 | 7-Keto-8-Aminopelargonic Acid              |
| 170.1278 | 187.121 | -0.0102 | 170.1176 | 140 | 42   | 7-Keto-8-Aminopelargonic Acid              |
| 474.2957 | 473.275 | -0.0134 | 474.2823 | 52  | 63.5 | Leu-Trp-Arg                                |
| 170.1278 | 169.085 | -0.0354 | 170.0924 | 160 | 35.9 | L-Histidine, 3-Methyl-                     |
| 458.3162 | 435.281 | -0.0463 | 458.2699 | 40  | 100  | N-Acetyl-S-Geranylgeranyl-L-Cysteine       |
| 170.1278 | 187.121 | -0.0102 | 170.1176 | 156 | 45.2 | 7-Keto-8-Aminopelargonic Acid              |
| 458.3162 | 435.281 | -0.0463 | 458.2699 | 37  | 100  | N-Acetyl-S-Geranylgeranyl-L-Cysteine       |
| 400.36   | 400.343 | -0.0179 | 400.3421 | 25  | 56.6 | Palmitoyl-L-Carnitine Cation               |
| 170.1278 | 187.121 | -0.0102 | 170.1176 | 170 | 50.5 | 7-Keto-8-Aminopelargonic Acid              |
| 400.319  | 401.278 | -0.0485 | 400.2705 | 16  | 100  | Myriocin                                   |
| 343.2918 | 342.256 | -0.0286 | 343.2632 | 81  | 100  | Retinyl Propionate                         |
| 170.1278 | 187.121 | -0.0102 | 170.1176 | 190 | 66.2 | 7-Keto-8-Aminopelargonic Acid              |
| 474.2957 | 473.275 | -0.0134 | 474.2823 | 47  | 100  | Ile-Trp-Arg                                |
| 170.1278 | 187.121 | -0.0102 | 170.1176 | 165 | 48.8 | 7-Keto-8-Aminopelargonic Acid              |
| 400.319  | 400.343 | 0.0231  | 400.3421 | 72  | 26.5 | Palmitoyl-L-Carnitine Cation               |
| 474.2957 | 473.275 | -0.0134 | 474.2823 | 43  | 38.5 | Leu-Trp-Arg                                |
| 170.1278 | 187.121 | -0.0102 | 170.1176 | 235 | 73.6 | 7-Keto-8-Aminopelargonic Acid              |
| 518.3145 | 495.332 | 0.0072  | 518.3217 | 104 | 100  | 1-Hexadecanoyl-Sn-Glycero-3-Phosphocholine |
| 400.319  | 400.343 | 0.0231  | 400.3421 | 119 | 30.9 | Palmitoyl-L-Carnitine Cation               |
| 170.1278 | 187.121 | -0.0102 | 170.1176 | 185 | 52.3 | 7-Keto-8-Aminopelargonic Acid              |
| 400.319  | 400.343 | 0.0231  | 400.3421 | 96  | 36.3 | Palmitoyl-L-Carnitine Cation               |

|          |         |         |          |     |      |                                            |
|----------|---------|---------|----------|-----|------|--------------------------------------------|
| 170.1278 | 187.121 | -0.0102 | 170.1176 | 165 | 49.4 | 7-Keto-8-Aminopelargonic Acid              |
| 170.1278 | 187.121 | -0.0102 | 170.1176 | 202 | 40   | 7-Keto-8-Aminopelargonic Acid              |
| 400.319  | 400.343 | 0.0231  | 400.3421 | 159 | 84.5 | Palmitoyl-L-Carnitine Cation               |
| 655.4719 | 654.492 | 0.0272  | 655.4991 | 151 | 51.2 | Deca(Propylene Glycol) Monobutyl Ether     |
| 170.1278 | 187.121 | -0.0102 | 170.1176 | 189 | 48.1 | 7-Keto-8-Aminopelargonic Acid              |
| 414.278  | 413.239 | -0.0321 | 414.2459 | 70  | 100  | Pyroglu-Lys-Arg                            |
| 370.2514 | 370     | -0.04   | 370.21   | 88  | 39.3 | MGDG 7:0; [M+NH4-CO]++; MGDG(2:0/5:0)      |
| 400.319  | 400.343 | 0.0231  | 400.3421 | 39  | 28.8 | Palmitoyl-L-Carnitine Cation               |
| 170.1278 | 187.121 | -0.0102 | 170.1176 | 194 | 41.3 | 7-Keto-8-Aminopelargonic Acid              |
| 414.278  | 413.239 | -0.0321 | 414.2459 | 59  | 55.4 | Pyroglu-Lys-Arg                            |
| 458.2953 | 457.244 | -0.044  | 458.251  | 59  | 67.1 | Pro-Trp-Arg                                |
| 343.2918 | 342.256 | -0.0286 | 343.2632 | 156 | 93.4 | Retinyl Propionate                         |
| 458.2953 | 457.244 | -0.044  | 458.251  | 90  | 31.9 | Pro-Trp-Arg                                |
| 170.1278 | 187.121 | -0.0102 | 170.1176 | 198 | 50.9 | 7-Keto-8-Aminopelargonic Acid              |
| 370.2514 | 370     | -0.04   | 370.21   | 182 | 37   | MGDG 7:0; [M+NH4-CO]++; MGDG(2:0/5:0)      |
| 474.2957 | 473.275 | -0.0134 | 474.2823 | 47  | 35.6 | Ile-Trp-Arg                                |
| 458.2953 | 457.244 | -0.044  | 458.251  | 130 | 23   | Pro-Trp-Arg                                |
| 170.1278 | 169.085 | -0.0354 | 170.0924 | 208 | 32.3 | L-Histidine, 1-Methyl-                     |
| 170.1278 | 187.121 | -0.0102 | 170.1176 | 155 | 49.3 | 7-Keto-8-Aminopelargonic Acid              |
| 458.2953 | 435.281 | -0.0254 | 458.2699 | 80  | 81.9 | N-Acetyl-S-Geranylgeranyl-L-Cysteine       |
| 170.1278 | 187.121 | -0.0102 | 170.1176 | 174 | 51   | 7-Keto-8-Aminopelargonic Acid              |
| 458.2953 | 435.281 | -0.0254 | 458.2699 | 70  | 83.8 | N-Acetyl-S-Geranylgeranyl-L-Cysteine       |
| 474.2957 | 473.275 | -0.0134 | 474.2823 | 23  | 56.6 | Ile-Trp-Arg                                |
| 170.1278 | 169.085 | -0.0354 | 170.0924 | 218 | 47.4 | L-Histidine, 1-Methyl-                     |
| 474.2957 | 473.275 | -0.0134 | 474.2823 | 36  | 100  | Ile-Trp-Arg                                |
| 370.2244 | 370     | -0.01   | 370.21   | 200 | 50   | MGDG 7:0; [M+NH4-CO]++; MGDG(2:0/5:0)      |
| 170.1278 | 187.121 | -0.0102 | 170.1176 | 223 | 57.4 | 7-Keto-8-Aminopelargonic Acid              |
| 518.3145 | 495.332 | 0.0072  | 518.3217 | 94  | 100  | 1-Hexadecanoyl-Sn-Glycero-3-Phosphocholine |
| 170.1278 | 169.085 | -0.0354 | 170.0924 | 193 | 36   | L-Histidine, 3-Methyl-                     |
| 458.3162 | 435.281 | -0.0463 | 458.2699 | 13  | 100  | N-Acetyl-S-Geranylgeranyl-L-Cysteine       |
| 170.1278 | 187.121 | -0.0102 | 170.1176 | 192 | 36.9 | 7-Keto-8-Aminopelargonic                   |

|          |         |         |          |     |      |                                                   |
|----------|---------|---------|----------|-----|------|---------------------------------------------------|
|          |         |         |          |     |      | Acid                                              |
| 474.2957 | 473.275 | -0.0134 | 474.2823 | 33  | 100  | Leu-Trp-Arg                                       |
| 170.1278 | 187.121 | -0.0102 | 170.1176 | 189 | 45   | 7-Keto-8-Aminopelargonic Acid                     |
| 474.2957 | 473.275 | -0.0134 | 474.2823 | 37  | 25.7 | Ile-Trp-Arg                                       |
| 170.1278 | 187.121 | -0.0102 | 170.1176 | 146 | 44.1 | 7-Keto-8-Aminopelargonic Acid                     |
| 170.1278 | 187.121 | -0.0102 | 170.1176 | 181 | 38.4 | 7-Keto-8-Aminopelargonic Acid                     |
| 458.2953 | 435.281 | -0.0254 | 458.2699 | 50  | 77.3 | N-Acetyl-S-Geranylgeranyl-L-Cysteine              |
| 474.2957 | 473.275 | -0.0134 | 474.2823 | 36  | 100  | Leu-Trp-Arg                                       |
| 170.1278 | 169.085 | -0.0354 | 170.0924 | 250 | 37.9 | L-Histidine, 1-Methyl-                            |
| 170.1278 | 187.121 | -0.0102 | 170.1176 | 221 | 44.7 | 7-Keto-8-Aminopelargonic Acid                     |
| 458.3162 | 435.281 | -0.0463 | 458.2699 | 21  | 100  | N-Acetyl-S-Geranylgeranyl-L-Cysteine              |
| 170.1278 | 187.121 | -0.0102 | 170.1176 | 241 | 41.9 | 7-Keto-8-Aminopelargonic Acid                     |
| 170.1278 | 187.121 | -0.0102 | 170.1176 | 177 | 48.1 | 7-Keto-8-Aminopelargonic Acid                     |
| 370.2514 | 370     | -0.04   | 370.21   | 152 | 38.1 | MGDG 7:0; [M+NH4-CO] <sup>+</sup> ; MGDG(2:0/5:0) |
| 170.1278 | 187.121 | -0.0102 | 170.1176 | 163 | 51.9 | 7-Keto-8-Aminopelargonic Acid                     |
| 170.1278 | 187.121 | -0.0102 | 170.1176 | 288 | 67.7 | 7-Keto-8-Aminopelargonic Acid                     |
| 414.2587 | 413.239 | -0.0128 | 414.2459 | 77  | 100  | Pyroglu-Lys-Arg                                   |
| 170.1278 | 187.121 | -0.0102 | 170.1176 | 216 | 47.7 | 7-Keto-8-Aminopelargonic Acid                     |
| 170.1278 | 187.121 | -0.0102 | 170.1176 | 209 | 47.1 | 7-Keto-8-Aminopelargonic Acid                     |
| 170.1278 | 187.121 | -0.0102 | 170.1176 | 185 | 44   | 7-Keto-8-Aminopelargonic Acid                     |
| 170.1278 | 187.121 | -0.0102 | 170.1176 | 189 | 68.4 | 7-Keto-8-Aminopelargonic Acid                     |
| 170.1278 | 187.121 | -0.0102 | 170.1176 | 180 | 41.1 | 7-Keto-8-Aminopelargonic Acid                     |
| 474.2957 | 473.275 | -0.0134 | 474.2823 | 73  | 42.6 | Leu-Trp-Arg                                       |
| 370.2244 | 370     | -0.01   | 370.21   | 150 | 38.5 | MGDG 7:0; [M+NH4-CO] <sup>+</sup> ; MGDG(2:0/5:0) |
| 170.1278 | 187.121 | -0.0102 | 170.1176 | 191 | 29.9 | 7-Keto-8-Aminopelargonic Acid                     |
| 472.2733 | 471.223 | -0.043  | 472.2303 | 39  | 100  | Pyroglu-Trp-Arg                                   |
| 170.1278 | 169.085 | -0.0354 | 170.0924 | 211 | 31.1 | L-Histidine, 3-Methyl-                            |
| 655.5145 | 654.492 | -0.0154 | 655.4991 | 243 | 27.8 | Deca(Propylene Glycol) Monobutyl Ether            |
| 370.2514 | 370     | -0.04   | 370.21   | 169 | 24.2 | MGDG 7:0; [M+NH4-CO] <sup>+</sup> ;               |

|          |         |         |          |     |      |                                            |
|----------|---------|---------|----------|-----|------|--------------------------------------------|
|          |         |         |          |     |      | MGDG(2:0/5:0)                              |
| 170.1278 | 187.121 | -0.0102 | 170.1176 | 189 | 48.2 | 7-Keto-8-Aminopelargonic Acid              |
| 170.1278 | 187.121 | -0.0102 | 170.1176 | 232 | 51.4 | 7-Keto-8-Aminopelargonic Acid              |
| 370.2244 | 370     | -0.01   | 370.21   | 150 | 48.6 | MGDG 7:0; [M+NH4-CO]+; MGDG(2:0/5:0)       |
| 472.3027 | 471.314 | 0.018   | 472.321  | 106 | 100  | Terfenadine                                |
| 170.1278 | 187.121 | -0.0102 | 170.1176 | 210 | 51.6 | 7-Keto-8-Aminopelargonic Acid              |
| 474.2957 | 473.275 | -0.0134 | 474.2823 | 25  | 54.2 | Leu-Trp-Arg                                |
| 370.2514 | 370     | -0.04   | 370.21   | 135 | 36.8 | MGDG 7:0; [M+NH4-CO]+; MGDG(2:0/5:0)       |
| 170.1278 | 187.121 | -0.0102 | 170.1176 | 196 | 43.5 | 7-Keto-8-Aminopelargonic Acid              |
| 170.1278 | 187.121 | -0.0102 | 170.1176 | 238 | 48.4 | 7-Keto-8-Aminopelargonic Acid              |
| 170.1278 | 187.121 | -0.0102 | 170.1176 | 183 | 50.5 | 7-Keto-8-Aminopelargonic Acid              |
| 458.3162 | 435.281 | -0.0463 | 458.2699 | 38  | 100  | N-Acetyl-S-Geranylgeranyl-L-Cysteine       |
| 170.1278 | 187.121 | -0.0102 | 170.1176 | 181 | 60.2 | 7-Keto-8-Aminopelargonic Acid              |
| 170.1278 | 187.121 | -0.0102 | 170.1176 | 301 | 34.6 | 7-Keto-8-Aminopelargonic Acid              |
| 400.319  | 400.343 | 0.0231  | 400.3421 | 32  | 62.3 | Palmitoyl-L-Carnitine Cation               |
| 170.1278 | 187.121 | -0.0102 | 170.1176 | 198 | 38.8 | 7-Keto-8-Aminopelargonic Acid              |
| 370.2244 | 370     | -0.01   | 370.21   | 95  | 50   | MGDG 7:0; [M+NH4-CO]+; MGDG(2:0/5:0)       |
| 170.1278 | 169.085 | -0.0354 | 170.0924 | 394 | 46.7 | L-Histidine, 1-Methyl-                     |
| 170.1278 | 187.121 | -0.0102 | 170.1176 | 385 | 74.8 | 7-Keto-8-Aminopelargonic Acid              |
| 400.319  | 400.343 | 0.0231  | 400.3421 | 119 | 24   | Palmitoyl-L-Carnitine Cation               |
| 102.1273 | 102.092 | -0.036  | 102.0913 | 214 | 11.4 | Betaine Aldehyde Cation                    |
| 276.1948 | 319.133 | -0.0441 | 276.1507 | 107 | 77.8 | Norfloxacin                                |
| 170.1278 | 187.121 | -0.0102 | 170.1176 | 372 | 58.3 | 7-Keto-8-Aminopelargonic Acid              |
| 472.2733 | 471.223 | -0.043  | 472.2303 | 131 | 100  | Pyroglu-Trp-Arg                            |
| 474.2957 | 473.275 | -0.0134 | 474.2823 | 59  | 100  | Leu-Trp-Arg                                |
| 170.1278 | 187.121 | -0.0102 | 170.1176 | 358 | 55.9 | 7-Keto-8-Aminopelargonic Acid              |
| 400.319  | 400.343 | 0.0231  | 400.3421 | 83  | 40.7 | Palmitoyl-L-Carnitine Cation               |
| 170.1278 | 187.121 | -0.0102 | 170.1176 | 353 | 72.6 | 7-Keto-8-Aminopelargonic Acid              |
| 518.3145 | 495.332 | 0.0072  | 518.3217 | 62  | 100  | 1-Hexadecanoyl-Sn-Glycero-3-Phosphocholine |



|          |         |         |          |     |      |                               |
|----------|---------|---------|----------|-----|------|-------------------------------|
| 474.2957 | 473.275 | -0.0134 | 474.2823 | 99  | 68.4 | Leu-Trp-Arg                   |
| 170.1278 | 187.121 | -0.0102 | 170.1176 | 437 | 77.3 | 7-Keto-8-Aminopelargonic Acid |
| 474.2957 | 473.275 | -0.0134 | 474.2823 | 67  | 66.1 | Leu-Trp-Arg                   |
| 474.2738 | 473.275 | 0.0085  | 474.2823 | 51  | 100  | Leu-Trp-Arg                   |
| 472.2733 | 471.314 | 0.048   | 472.321  | 190 | 100  | Terfenadine                   |
| 474.2957 | 473.275 | -0.0134 | 474.2823 | 93  | 44.3 | Ile-Trp-Arg                   |
| 170.1278 | 187.121 | -0.0102 | 170.1176 | 449 | 76.2 | 7-Keto-8-Aminopelargonic Acid |

**Table A6.** List of non-volatile metabolites (LC/MS) for managed population animals. Samples collected in May 2011 from two animals were pooled. Experiment was conducted using HILIC column (refer to Materials and Methods section) in positive ion mode. Top three matches are given for each compound.

| Parent m/z | Mass    | Delta (m/z) | Library Precursor m/z | Match Score | Probability (%) | Chem ID                       |
|------------|---------|-------------|-----------------------|-------------|-----------------|-------------------------------|
| 170.1278   | 187.121 | -0.0102     | 170.1176              | 417         | 76              | 7-Keto-8-Aminopelargonic Acid |
| 170.1278   | 187.121 | -0.0102     | 170.1176              | 363         | 14.9            | 7-Keto-8-Aminopelargonic Acid |
| 170.1278   | 169.085 | -0.0354     | 170.0924              | 310         | 2.9             | L-Histidine, 3-Methyl-        |
| 472.2733   | 471.314 | 0.048       | 472.321               | 99          | 61.1            | Terfenadine                   |
| 472.2733   | 471.314 | 0.048       | 472.321               | 86          | 61.1            | Terfenadine                   |
| 472.2733   | 471.223 | -0.043      | 472.2303              | 72          | 18              | Pyroglu-Trp-Arg               |
| 516.3059   | 515.292 | -0.007      | 516.2989              | 105         | 100             | Taurocholic Acid              |
| 170.1278   | 187.121 | -0.0102     | 170.1176              | 451         | 72.6            | 7-Keto-8-Aminopelargonic Acid |
| 170.1278   | 187.121 | -0.0102     | 170.1176              | 427         | 24.3            | 7-Keto-8-Aminopelargonic Acid |
| 170.1278   | 187.121 | -0.0102     | 170.1176              | 338         | 2.1             | 7-Keto-8-Aminopelargonic Acid |
| 370.2514   | 369.288 | 0.0438      | 370.2952              | 191         | 35              | N-Oleoyl-L-Serine             |
| 370.2514   | 369.288 | 0.0438      | 370.2952              | 174         | 19.1            | N-Oleoyl-L-Serine             |
| 370.2514   | 369.288 | 0.0438      | 370.2952              | 172         | 17.6            | N-Oleoyl-L-Serine             |
| 170.1278   | 187.121 | -0.0102     | 170.1176              | 383         | 75.9            | 7-Keto-8-Aminopelargonic Acid |
| 170.1278   | 187.121 | -0.0102     | 170.1176              | 335         | 15.7            | 7-Keto-8-Aminopelargonic Acid |
| 170.1278   | 169.085 | -0.0354     | 170.0924              | 300         | 3.9             | L-Histidine, 1-Methyl-        |
| 400.319    | 400.343 | 0.0231      | 400.3421              | 94          | 12.6            | Palmitoyl-L-Carnitine Cation  |
| 400.319    | 400.343 | 0.0231      | 400.3421              | 93          | 12.1            | Palmitoyl-L-Carnitine         |

|          |         |         |          |     |      | Cation                                    |
|----------|---------|---------|----------|-----|------|-------------------------------------------|
| 400.319  | 400.343 | 0.0231  | 400.3421 | 93  | 12.1 | Palmitoyl-L-Carnitine<br>Cation           |
| 472.2733 | 471.314 | 0.048   | 472.321  | 134 | 80.3 | Terfenadine                               |
| 472.2733 | 471.314 | 0.048   | 472.321  | 115 | 80.3 | Terfenadine                               |
| 472.2733 | 471.314 | 0.048   | 472.321  | 79  | 80.3 | Terfenadine                               |
| 170.1278 | 187.121 | -0.0102 | 170.1176 | 405 | 73.6 | 7-Keto-8-Aminopelargonic<br>Acid          |
| 170.1278 | 187.121 | -0.0102 | 170.1176 | 374 | 20.1 | 7-Keto-8-Aminopelargonic<br>Acid          |
| 170.1278 | 169.085 | -0.0354 | 170.0924 | 315 | 3.6  | L-Histidine, 1-Methyl-                    |
| 370.2514 | 369.288 | 0.0438  | 370.2952 | 248 | 27.8 | N-Oleoyl-L-Serine                         |
| 370.2514 | 369.288 | 0.0438  | 370.2952 | 237 | 19.1 | N-Oleoyl-L-Serine                         |
| 370.2514 | 369.288 | 0.0438  | 370.2952 | 221 | 11   | N-Oleoyl-L-Serine                         |
| 461.2907 | 460.28  | -0.0036 | 461.2871 | 33  | 100  | Trp-Lys-Lys                               |
| 655.4719 | 654.492 | 0.0272  | 655.4991 | 194 | 51.2 | Deca(Propylene Glycol)<br>Monobutyl Ether |
| 655.4719 | 654.492 | 0.0272  | 655.4991 | 177 | 27.9 | Deca(Propylene Glycol)<br>Monobutyl Ether |
| 655.4719 | 654.492 | 0.0272  | 655.4991 | 169 | 20.8 | Deca(Propylene Glycol)<br>Monobutyl Ether |
| 474.2957 | 473.275 | -0.0134 | 474.2823 | 56  | 20.6 | Leu-Trp-Arg                               |
| 474.2957 | 473.275 | -0.0134 | 474.2823 | 53  | 18.2 | Ile-Trp-Arg                               |
| 474.2957 | 473.275 | -0.0134 | 474.2823 | 35  | 9.4  | Leu-Trp-Arg                               |
| 458.3162 | 435.281 | -0.0463 | 458.2699 | 63  | 100  | N-Acetyl-S-Geranylgeranyl-<br>L-Cysteine  |
| 472.2733 | 471.314 | 0.048   | 472.321  | 86  | 100  | Terfenadine                               |
| 472.2733 | 471.314 | 0.048   | 472.321  | 75  | 100  | Terfenadine                               |
| 170.116  | 187.121 | 0.0016  | 170.1176 | 408 | 78.4 | 7-Keto-8-Aminopelargonic<br>Acid          |
| 170.116  | 187.121 | 0.0016  | 170.1176 | 366 | 17.6 | 7-Keto-8-Aminopelargonic<br>Acid          |
| 170.116  | 169.085 | -0.0236 | 170.0924 | 302 | 2.9  | L-Histidine, 1-Methyl-                    |
| 472.2733 | 471.223 | -0.043  | 472.2303 | 83  | 100  | Pyroglu-Trp-Arg                           |
| 414.278  | 449.314 | 0.0223  | 414.3003 | 241 | 97.3 | Glycodeoxycholic Acid                     |
| 414.278  | 449.314 | 0.0223  | 414.3003 | 214 | 97.3 | Glycodeoxycholic Acid                     |
| 414.278  | 449.314 | 0.0223  | 414.3003 | 170 | 97.3 | Glycodeoxycholic Acid                     |
| 472.2733 | 471.314 | 0.048   | 472.321  | 139 | 89.1 | Terfenadine                               |
| 472.2733 | 471.314 | 0.048   | 472.321  | 125 | 89.1 | Terfenadine                               |
| 472.2733 | 471.314 | 0.048   | 472.321  | 97  | 89.1 | Terfenadine                               |
| 170.1278 | 187.121 | -0.0102 | 170.1176 | 439 | 77   | 7-Keto-8-Aminopelargonic<br>Acid          |
| 170.1278 | 187.121 | -0.0102 | 170.1176 | 400 | 18.1 | 7-Keto-8-Aminopelargonic<br>Acid          |
| 170.1278 | 187.121 | -0.0102 | 170.1176 | 335 | 2.9  | 7-Keto-8-Aminopelargonic                  |

|          |         |         |          |     |      |                                             |
|----------|---------|---------|----------|-----|------|---------------------------------------------|
|          |         |         |          |     |      | Acid                                        |
| 400.319  | 400.343 | 0.0231  | 400.3421 | 197 | 19.9 | Palmitoyl-L-Carnitine Cation                |
| 400.319  | 400.343 | 0.0231  | 400.3421 | 195 | 18.3 | Palmitoyl-L-Carnitine Cation                |
| 400.319  | 400.343 | 0.0231  | 400.3421 | 187 | 13.7 | Palmitoyl-L-Carnitine Cation                |
| 414.278  | 449.314 | 0.0223  | 414.3003 | 306 | 99   | Glycodeoxycholic Acid                       |
| 414.278  | 449.314 | 0.0223  | 414.3003 | 260 | 99   | Glycodeoxycholic Acid                       |
| 414.278  | 413.239 | -0.0321 | 414.2459 | 64  | 1    | Pyroglu-Arg-Lys                             |
| 472.3027 | 471.314 | 0.018   | 472.321  | 148 | 100  | Terfenadine                                 |
| 472.3027 | 471.314 | 0.018   | 472.321  | 135 | 100  | Terfenadine                                 |
| 391.2842 | 390.277 | 0.0001  | 391.2843 | 115 | 54.1 | Bis(2-Ethylhexyl) Phthalate                 |
| 391.2842 | 390.277 | 0.0001  | 391.2843 | 109 | 42.5 | Diethyl Phthalate                           |
| 391.2842 | 390.277 | 0.0001  | 391.2843 | 100 | 42.5 | Diethyl Phthalate                           |
| 170.1278 | 169.074 | -0.0466 | 170.0812 | 244 | 39.5 | DL-Norepinephrine                           |
| 170.1278 | 169.074 | -0.0466 | 170.0812 | 237 | 39.5 | DL-Norepinephrine                           |
| 170.1278 | 169.074 | -0.0466 | 170.0812 | 233 | 39.5 | DL-Norepinephrine                           |
| 419.3154 | 418.308 | 0.0002  | 419.3156 | 205 | 100  | 1,2-Benzenedicarboxylic Acid, Dinonyl Ester |
| 149.0229 | 166.027 | 0.0004  | 149.0233 | 440 | 98.6 | 1,2-Benzenedicarboxylic Acid                |
| 149.0229 | 166.027 | 0.0004  | 149.0233 | 429 | 98.6 | 1,2-Benzenedicarboxylic Acid                |
| 149.0229 | 166.027 | 0.0004  | 149.0233 | 425 | 98.6 | 1,2-Benzenedicarboxylic Acid                |
| 343.2918 | 342.256 | -0.0286 | 343.2632 | 301 | 95.4 | Retinyl Propionate                          |
| 343.2918 | 342.256 | -0.0286 | 343.2632 | 297 | 95.4 | Retinyl Propionate                          |
| 343.2918 | 342.256 | -0.0286 | 343.2632 | 288 | 95.4 | Retinyl Propionate                          |
| 170.1383 | 169.085 | -0.0459 | 170.0924 | 248 | 31.8 | L-Histidine, 3-Methyl-                      |
| 170.1383 | 187.121 | -0.0207 | 170.1176 | 240 | 23.7 | 7-Keto-8-Aminopelargonic Acid               |
| 170.1383 | 169.085 | -0.0459 | 170.0924 | 232 | 31.8 | L-Histidine, 3-Methyl-                      |
| 391.2842 | 390.277 | 0.0001  | 391.2843 | 103 | 52.2 | Bis(2-Ethylhexyl) Phthalate                 |
| 391.2842 | 390.277 | 0.0001  | 391.2843 | 99  | 44.1 | Diethyl Phthalate                           |
| 391.2842 | 390.277 | 0.0001  | 391.2843 | 89  | 44.1 | Diethyl Phthalate                           |
| 399.251  | 398.243 | -0.0004 | 399.2506 | 174 | 100  | Tris(Butoxyethyl) Phosphate                 |
| 399.251  | 398.243 | -0.0004 | 399.2506 | 73  | 100  | Tris(Butoxyethyl) Phosphate                 |
| 399.251  | 398.243 | -0.0004 | 399.2506 | 72  | 100  | Tris(Butoxyethyl) Phosphate                 |
| 472.3317 | 471.314 | -0.011  | 472.321  | 164 | 100  | Terfenadine                                 |
| 472.3317 | 471.314 | -0.011  | 472.321  | 132 | 100  | Terfenadine                                 |
| 516.3458 | 515.292 | -0.0469 | 516.2989 | 282 | 100  | Taurocholic Acid                            |
| 516.3458 | 515.292 | -0.0469 | 516.2989 | 280 | 100  | Taurocholic Acid                            |
| 516.3458 | 515.292 | -0.0469 | 516.2989 | 212 | 100  | Taurocholic Acid                            |

|          |         |         |          |     |      |                                           |
|----------|---------|---------|----------|-----|------|-------------------------------------------|
| 516.3458 | 515.292 | -0.0469 | 516.2989 | 203 | 100  | Taurocholic Acid                          |
| 516.3458 | 515.292 | -0.0469 | 516.2989 | 193 | 100  | Taurocholic Acid                          |
| 387.1816 | 193.074 | -0.0265 | 387.1551 | 172 | 26.2 | Hippuric Acid, Methyl Ester               |
| 387.1816 | 193.074 | -0.0265 | 387.1551 | 169 | 26.2 | Hippuric Acid, Methyl Ester               |
| 387.1816 | 193.074 | -0.0265 | 387.1551 | 166 | 26.2 | Hippuric Acid, Methyl Ester               |
| 404.2057 | 403.254 | 0.0559  | 404.2616 | 6   | 26.3 | Arg-Thr-Lys                               |
| 404.2057 | 403.254 | 0.0559  | 404.2616 | 5   | 25.2 | Arg-Thr-Lys                               |
| 404.2057 | 403.254 | 0.0559  | 404.2616 | 4   | 24.3 | Arg-Thr-Lys                               |
| 474.2957 | 473.275 | -0.0134 | 474.2823 | 76  | 100  | Leu-Trp-Arg                               |
| 472.3317 | 471.314 | -0.011  | 472.321  | 164 | 100  | Terfenadine                               |
| 472.3317 | 471.314 | -0.011  | 472.321  | 129 | 100  | Terfenadine                               |
| 170.1278 | 169.085 | -0.0354 | 170.0924 | 376 | 38.1 | L-Histidine, 3-Methyl-                    |
| 170.1278 | 169.085 | -0.0354 | 170.0924 | 372 | 32.2 | L-Histidine, 1-Methyl-                    |
| 170.1278 | 169.085 | -0.0354 | 170.0924 | 370 | 32.2 | L-Histidine, 1-Methyl-                    |
| 655.4719 | 654.492 | 0.0272  | 655.4991 | 252 | 19.9 | Deca(Propylene Glycol)<br>Monobutyl Ether |
| 655.4719 | 654.492 | 0.0272  | 655.4991 | 251 | 19.1 | Deca(Propylene Glycol)<br>Monobutyl Ether |
| 655.4719 | 654.492 | 0.0272  | 655.4991 | 239 | 12.8 | Deca(Propylene Glycol)<br>Monobutyl Ether |
| 170.1278 | 169.085 | -0.0354 | 170.0924 | 423 | 56   | L-Histidine, 3-Methyl-                    |
| 170.1278 | 169.085 | -0.0354 | 170.0924 | 405 | 28.9 | L-Histidine, 1-Methyl-                    |
| 170.1278 | 169.085 | -0.0354 | 170.0924 | 404 | 56   | L-Histidine, 3-Methyl-                    |
| 279.0936 | 278.086 | -0.0002 | 279.0933 | 11  | 100  | Triphenylphosphine Oxide                  |
| 279.0936 | 278.086 | -0.0002 | 279.0933 | 9   | 100  | Triphenylphosphine Oxide                  |
| 279.0936 | 278.086 | -0.0002 | 279.0933 | 8   | 100  | Triphenylphosphine Oxide                  |
| 516.3458 | 515.292 | -0.0469 | 516.2989 | 161 | 100  | Taurocholic Acid                          |
| 516.3458 | 515.292 | -0.0469 | 516.2989 | 156 | 100  | Taurocholic Acid                          |
| 516.3458 | 515.292 | -0.0469 | 516.2989 | 154 | 100  | Taurocholic Acid                          |
| 655.4533 | 654.492 | 0.0458  | 655.4991 | 304 | 22.1 | Deca(Propylene Glycol)<br>Monobutyl Ether |
| 655.4533 | 654.492 | 0.0458  | 655.4991 | 299 | 17.8 | Deca(Propylene Glycol)<br>Monobutyl Ether |
| 655.4533 | 654.492 | 0.0458  | 655.4991 | 293 | 14   | Deca(Propylene Glycol)<br>Monobutyl Ether |
| 288.2533 | 287.196 | -0.05   | 288.203  | 105 | 26.1 | Leu-Arg                                   |
| 288.2533 | 287.196 | -0.05   | 288.203  | 101 | 22.1 | Arg-Leu                                   |
| 288.2533 | 287.196 | -0.05   | 288.203  | 91  | 15.6 | Arg-Ile                                   |
| 472.3317 | 471.314 | -0.011  | 472.321  | 118 | 100  | Terfenadine                               |
| 472.3317 | 471.314 | -0.011  | 472.321  | 99  | 100  | Terfenadine                               |
| 170.1278 | 169.085 | -0.0354 | 170.0924 | 294 | 43   | L-Histidine, 1-Methyl-                    |
| 170.1278 | 169.085 | -0.0354 | 170.0924 | 291 | 43   | L-Histidine, 1-Methyl-                    |
| 170.1278 | 169.085 | -0.0354 | 170.0924 | 285 | 43   | L-Histidine, 1-Methyl-                    |

|          |         |         |          |     |      |                                           |
|----------|---------|---------|----------|-----|------|-------------------------------------------|
| 496.4192 | 495.369 | -0.043  | 496.3762 | 167 | 100  | 2-O-Methyl PAF C-16                       |
| 496.4192 | 495.369 | -0.043  | 496.3762 | 167 | 100  | 2-O-Methyl PAF C-16                       |
| 496.4192 | 495.369 | -0.043  | 496.3762 | 163 | 100  | 2-O-Methyl PAF C-16                       |
| 655.5042 | 654.492 | -0.0051 | 655.4991 | 289 | 19.2 | Deca(Propylene Glycol)<br>Monobutyl Ether |
| 655.5042 | 654.492 | -0.0051 | 655.4991 | 287 | 17.7 | Deca(Propylene Glycol)<br>Monobutyl Ether |
| 655.5042 | 654.492 | -0.0051 | 655.4991 | 283 | 14.9 | Deca(Propylene Glycol)<br>Monobutyl Ether |
| 695.4768 | 695     | 0.04    | 695.52   | 85  | 50   | DG 42:10; [M+Li]+;<br>DG(20:5/22:5/0:0)   |
| 695.4768 | 695     | 0.04    | 695.52   | 85  | 50   | DG 42:10; [M+Li]+;<br>DG(22:5/20:5/0:0)   |
| 516.3458 | 515.292 | -0.0469 | 516.2989 | 197 | 100  | Taurocholic Acid                          |
| 516.3458 | 515.292 | -0.0469 | 516.2989 | 196 | 100  | Taurocholic Acid                          |
| 516.3458 | 515.292 | -0.0469 | 516.2989 | 195 | 100  | Taurocholic Acid                          |
| 472.3317 | 471.314 | -0.011  | 472.321  | 190 | 100  | Terfenadine                               |
| 472.3317 | 471.314 | -0.011  | 472.321  | 167 | 100  | Terfenadine                               |
| 414.278  | 413.239 | -0.0321 | 414.2459 | 176 | 69.2 | Pyroglu-Arg-Lys                           |
| 414.278  | 413.239 | -0.0321 | 414.2459 | 132 | 15   | Pyroglu-Arg-Lys                           |
| 414.278  | 413.239 | -0.0321 | 414.2459 | 110 | 5.9  | Pyroglu-Lys-Arg                           |
| 516.3458 | 515.292 | -0.0469 | 516.2989 | 169 | 100  | Taurocholic Acid                          |
| 516.3458 | 515.292 | -0.0469 | 516.2989 | 167 | 100  | Taurocholic Acid                          |
| 516.3458 | 515.292 | -0.0469 | 516.2989 | 160 | 100  | Taurocholic Acid                          |
| 170.116  | 187.121 | 0.0016  | 170.1176 | 386 | 45.1 | 7-Keto-8-Aminopelargonic<br>Acid          |
| 170.116  | 169.085 | -0.0236 | 170.0924 | 364 | 17.9 | L-Histidine, 1-Methyl-                    |
| 170.116  | 169.085 | -0.0236 | 170.0924 | 362 | 17.9 | L-Histidine, 1-Methyl-                    |
| 472.3317 | 471.314 | -0.011  | 472.321  | 216 | 100  | Terfenadine                               |
| 472.3317 | 471.314 | -0.011  | 472.321  | 194 | 100  | Terfenadine                               |
| 472.3317 | 471.314 | -0.011  | 472.321  | 151 | 100  | Terfenadine                               |
| 461.2907 | 460.243 | -0.04   | 461.2507 | 87  | 80.4 | Trp-Gln-Lys                               |
| 461.2907 | 460.28  | -0.0036 | 461.2871 | 50  | 19.6 | Trp-Lys-Lys                               |
| 516.3458 | 515.292 | -0.0469 | 516.2989 | 282 | 100  | Taurocholic Acid                          |
| 516.3458 | 515.292 | -0.0469 | 516.2989 | 264 | 100  | Taurocholic Acid                          |
| 516.3458 | 515.292 | -0.0469 | 516.2989 | 263 | 100  | Taurocholic Acid                          |
| 170.116  | 169.085 | -0.0236 | 170.0924 | 420 | 38.9 | L-Histidine, 1-Methyl-                    |
| 170.116  | 187.121 | 0.0016  | 170.1176 | 419 | 37.4 | 7-Keto-8-Aminopelargonic<br>Acid          |
| 170.116  | 169.085 | -0.0236 | 170.0924 | 416 | 38.9 | L-Histidine, 1-Methyl-                    |
| 370.2514 | 369.288 | 0.0438  | 370.2952 | 302 | 26.5 | N-Oleoyl-L-Serine                         |
| 370.2514 | 369.288 | 0.0438  | 370.2952 | 297 | 21.3 | N-Oleoyl-L-Serine                         |
| 370.2514 | 369.288 | 0.0438  | 370.2952 | 279 | 11   | N-Oleoyl-L-Serine                         |
| 516.3458 | 515.292 | -0.0469 | 516.2989 | 229 | 100  | Taurocholic Acid                          |

|          |         |         |          |     |      |                                                      |
|----------|---------|---------|----------|-----|------|------------------------------------------------------|
| 516.3458 | 515.292 | -0.0469 | 516.2989 | 226 | 100  | Taurocholic Acid                                     |
| 516.3458 | 515.292 | -0.0469 | 516.2989 | 218 | 100  | Taurocholic Acid                                     |
| 170.1132 | 187.121 | 0.0044  | 170.1176 | 403 | 54.8 | 7-Keto-8-Aminopelargonic Acid                        |
| 170.1132 | 169.085 | -0.0208 | 170.0924 | 379 | 18.4 | L-Histidine, 1-Methyl-                               |
| 170.1132 | 169.085 | -0.0208 | 170.0924 | 376 | 18.4 | L-Histidine, 1-Methyl-                               |
| 414.278  | 449.314 | 0.0223  | 414.3003 | 238 | 88.8 | Glycodeoxycholic Acid                                |
| 414.278  | 449.314 | 0.0223  | 414.3003 | 191 | 88.8 | Glycodeoxycholic Acid                                |
| 414.278  | 413.239 | -0.0321 | 414.2459 | 151 | 7.8  | Pyroglu-Arg-Lys                                      |
| 370.2514 | 369.288 | 0.0438  | 370.2952 | 93  | 9.3  | N-Oleoyl-L-Serine                                    |
| 370.2514 | 369.288 | 0.0438  | 370.2952 | 93  | 9.3  | N-Oleoyl-L-Serine                                    |
| 370.2514 | 369.288 | 0.0438  | 370.2952 | 92  | 9    | N-Oleoyl-L-Serine                                    |
| 461.2907 | 460.243 | -0.04   | 461.2507 | 108 | 85.2 | Trp-Gln-Lys                                          |
| 461.2907 | 460.28  | -0.0036 | 461.2871 | 47  | 14.8 | Trp-Lys-Lys                                          |
| 516.3458 | 515.292 | -0.0469 | 516.2989 | 240 | 100  | Taurocholic Acid                                     |
| 516.3458 | 515.292 | -0.0469 | 516.2989 | 204 | 100  | Taurocholic Acid                                     |
| 474.2738 | 473.275 | 0.0085  | 474.2823 | 19  | 57.9 | Leu-Trp-Arg                                          |
| 474.2738 | 473.275 | 0.0085  | 474.2823 | 10  | 42.1 | Leu-Trp-Arg                                          |
| 151.0962 | 150.089 | 0.0003  | 151.0965 | 238 | 100  | Triethylene Glycol                                   |
| 151.0962 | 150.089 | 0.0003  | 151.0965 | 236 | 100  | Triethylene Glycol                                   |
| 151.0962 | 150.089 | 0.0003  | 151.0965 | 232 | 100  | Triethylene Glycol                                   |
| 414.278  | 449.314 | 0.0223  | 414.3003 | 291 | 92.4 | Glycodeoxycholic Acid                                |
| 414.278  | 413.239 | -0.0321 | 414.2459 | 145 | 2.7  | Pyroglu-Arg-Lys                                      |
| 414.278  | 413.239 | -0.0321 | 414.2459 | 134 | 1.9  | Pyroglu-Arg-Lys                                      |
| 370.2514 | 369.288 | 0.0438  | 370.2952 | 204 | 18   | N-Oleoyl-L-Serine                                    |
| 370.2514 | 369.288 | 0.0438  | 370.2952 | 200 | 15.2 | N-Oleoyl-L-Serine                                    |
| 370.2514 | 369.288 | 0.0438  | 370.2952 | 196 | 12.8 | N-Oleoyl-L-Serine                                    |
| 516.3458 | 515.292 | -0.0469 | 516.2989 | 191 | 100  | Taurocholic Acid                                     |
| 474.2738 | 473.275 | 0.0085  | 474.2823 | 33  | 20.6 | Ile-Trp-Arg                                          |
| 474.2738 | 473.275 | 0.0085  | 474.2823 | 28  | 16.6 | Leu-Trp-Arg                                          |
| 474.2738 | 473.275 | 0.0085  | 474.2823 | 26  | 15.4 | Trp-Ile-Arg                                          |
| 461.2907 | 460.243 | -0.04   | 461.2507 | 124 | 23.9 | Trp-Gln-Lys                                          |
| 461.2907 | 460.243 | -0.04   | 461.2507 | 121 | 21.1 | Trp-Gln-Lys                                          |
| 461.2907 | 460.243 | -0.04   | 461.2507 | 103 | 10.9 | Trp-Gln-Lys                                          |
| 474.2957 | 473.275 | -0.0134 | 474.2823 | 70  | 33.4 | Leu-Trp-Arg                                          |
| 474.2957 | 473.275 | -0.0134 | 474.2823 | 59  | 22.9 | Trp-Ile-Arg                                          |
| 474.2957 | 473.275 | -0.0134 | 474.2823 | 48  | 15.7 | Trp-Ile-Arg                                          |
| 370.2514 | 369.288 | 0.0438  | 370.2952 | 121 | 10.1 | N-Oleoyl-L-Serine                                    |
| 370.2514 | 370     | -0.04   | 370.21   | 121 | 10.1 | MGDG 7:0; [M+NH4-CO] <sup>+</sup> ;<br>MGDG(2:0/5:0) |
| 370.2514 | 370     | -0.04   | 370.21   | 121 | 10.1 | MGDG 7:0; [M+NH4-CO] <sup>+</sup> ;<br>MGDG(5:0/2:0) |

|          |         |         |          |     |      |                                                    |
|----------|---------|---------|----------|-----|------|----------------------------------------------------|
| 461.2907 | 460.243 | -0.04   | 461.2507 | 91  | 22.7 | Trp-Gln-Lys                                        |
| 461.2907 | 460.243 | -0.04   | 461.2507 | 85  | 17.8 | Trp-Gln-Lys                                        |
| 461.2907 | 460.28  | -0.0036 | 461.2871 | 83  | 16.4 | Lys-Trp-Lys                                        |
| 474.2738 | 473.275 | 0.0085  | 474.2823 | 106 | 35.6 | Leu-Trp-Arg                                        |
| 474.2738 | 473.275 | 0.0085  | 474.2823 | 89  | 19.4 | Ile-Trp-Arg                                        |
| 474.2738 | 473.275 | 0.0085  | 474.2823 | 84  | 15.7 | Trp-Ile-Arg                                        |
| 458.2953 | 457.244 | -0.044  | 458.251  | 54  | 32.9 | Pro-Trp-Arg                                        |
| 458.2953 | 435.281 | -0.0254 | 458.2699 | 53  | 31.6 | N-Acetyl-S-Geranylgeranyl-L-Cysteine               |
| 458.2953 | 457.244 | -0.044  | 458.251  | 36  | 17.2 | Pro-Trp-Arg                                        |
| 244.1905 | 226.193 | 0.0366  | 244.2271 | 483 | 98.5 | 2,4,7,9-Tetramethyl-5-Decyne-4,7-Diol              |
| 244.1905 | 243.158 | -0.0249 | 244.1656 | 202 | 1    | Pro-Lys                                            |
| 244.1905 | 243.158 | -0.0249 | 244.1656 | 99  | 0.1  | Lys-Pro                                            |
| 472.3027 | 471.314 | 0.018   | 472.321  | 174 | 100  | Terfenadine                                        |
| 472.3027 | 471.314 | 0.018   | 472.321  | 159 | 100  | Terfenadine                                        |
| 370.238  | 370     | -0.03   | 370.21   | 121 | 50   | MGDG 7:0; [M+NH4-CO] <sup>+</sup> ; MGDG(2:0/5:0)  |
| 370.238  | 370     | -0.03   | 370.21   | 121 | 50   | MGDG 7:0; [M+NH4-CO] <sup>+</sup> ; MGDG(5:0/2:0)  |
| 422.2569 | 421.233 | -0.0171 | 422.2398 | 56  | 53.1 | Phe-Gln-Lys                                        |
| 422.2569 | 421.233 | -0.0171 | 422.2398 | 53  | 46.9 | Phe-Gln-Lys                                        |
| 474.2957 | 473.275 | -0.0134 | 474.2823 | 28  | 35   | Leu-Trp-Arg                                        |
| 474.2957 | 473.275 | -0.0134 | 474.2823 | 26  | 32.2 | Ile-Trp-Arg                                        |
| 474.2957 | 473.275 | -0.0134 | 474.2823 | 10  | 18.6 | Trp-Ile-Arg                                        |
| 370.2514 | 370     | -0.04   | 370.21   | 70  | 21.8 | MGDG 7:0; [M+NH4-CO] <sup>+</sup> ; MGDG(2:0/5:0)  |
| 370.2514 | 370     | -0.04   | 370.21   | 70  | 21.8 | MGDG 7:0; [M+NH4-CO] <sup>+</sup> ; MGDG(5:0/2:0)  |
| 370.2514 | 369.288 | 0.0438  | 370.2952 | 69  | 20.9 | N-Oleoyl-L-Serine                                  |
| 414.278  | 413.239 | -0.0321 | 414.2459 | 75  | 54.2 | Pyroglu-Lys-Arg                                    |
| 414.278  | 413.239 | -0.0321 | 414.2459 | 71  | 45.8 | Pyroglu-Lys-Arg                                    |
| 370.2514 | 369.288 | 0.0438  | 370.2952 | 115 | 13.5 | N-Oleoyl-L-Serine                                  |
| 370.2514 | 369.288 | 0.0438  | 370.2952 | 106 | 9.8  | N-Oleoyl-L-Serine                                  |
| 370.2514 | 369.288 | 0.0438  | 370.2952 | 106 | 9.8  | N-Oleoyl-L-Serine                                  |
| 170.116  | 187.121 | 0.0016  | 170.1176 | 273 | 59.3 | 7-Keto-8-Aminopelargonic Acid                      |
| 170.116  | 187.121 | 0.0016  | 170.1176 | 255 | 30.6 | 7-Keto-8-Aminopelargonic Acid                      |
| 170.116  | 169.085 | -0.0236 | 170.0924 | 204 | 6.2  | L-Histidine, 1-Methyl-                             |
| 239.1485 | 238.099 | -0.042  | 239.106  | 58  | 100  | 4-(2-Hydroxyethyl)Piperazine-1-Ethanesulfonic Acid |
| 370.2514 | 369.288 | 0.0438  | 370.2952 | 176 | 21.2 | N-Oleoyl-L-Serine                                  |

|          |         |         |          |     |      |                                                    |
|----------|---------|---------|----------|-----|------|----------------------------------------------------|
| 370.2514 | 369.288 | 0.0438  | 370.2952 | 169 | 16.3 | N-Oleoyl-L-Serine                                  |
| 370.2514 | 369.288 | 0.0438  | 370.2952 | 167 | 15   | N-Oleoyl-L-Serine                                  |
| 414.278  | 449.314 | 0.0223  | 414.3003 | 52  | 100  | Glycodeoxycholic Acid                              |
| 414.278  | 449.314 | 0.0223  | 414.3003 | 43  | 100  | Glycodeoxycholic Acid                              |
| 414.278  | 449.314 | 0.0223  | 414.3003 | 35  | 100  | Glycodeoxycholic Acid                              |
| 139.0499 | 138.043 | 0.0003  | 139.0502 | 548 | 83.8 | 4-Imidazoleacrylic Acid                            |
| 139.0499 | 138.043 | 0.0003  | 139.0502 | 546 | 83.8 | 4-Imidazoleacrylic Acid                            |
| 139.0499 | 138.043 | 0.0003  | 139.0502 | 536 | 83.8 | 4-Imidazoleacrylic Acid                            |
| 638.6063 | 638     | -0.04   | 638.57   | 133 | 29.3 | DG 36:2; [M+NH4]+;<br>DG(14:1/22:1/0:0)            |
| 638.6063 | 638     | -0.04   | 638.57   | 133 | 29.3 | DG 36:2; [M+NH4]+;<br>DG(22:1/14:1/0:0)            |
| 638.6063 | 638     | -0.04   | 638.57   | 123 | 20.7 | DG 36:2; [M+NH4]+;<br>DG(16:1/20:1/0:0)            |
| 239.1485 | 238.099 | -0.042  | 239.106  | 43  | 100  | 4-(2-Hydroxyethyl)Piperazine-1-Ethanesulfonic Acid |
| 239.1485 | 238.099 | -0.042  | 239.106  | 37  | 100  | 4-(2-Hydroxyethyl)Piperazine-1-Ethanesulfonic Acid |
| 239.1485 | 238.099 | -0.042  | 239.106  | 28  | 100  | 4-(2-Hydroxyethyl)Piperazine-1-Ethanesulfonic Acid |
| 472.2733 | 471.314 | 0.048   | 472.321  | 160 | 93.1 | Terfenadine                                        |
| 472.2733 | 471.223 | -0.043  | 472.2303 | 60  | 6.9  | Pyroglu-Trp-Arg                                    |
| 370.2514 | 369.288 | 0.0438  | 370.2952 | 290 | 23   | N-Oleoyl-L-Serine                                  |
| 370.2514 | 369.288 | 0.0438  | 370.2952 | 283 | 17.6 | N-Oleoyl-L-Serine                                  |
| 370.2514 | 369.288 | 0.0438  | 370.2952 | 280 | 15.6 | N-Oleoyl-L-Serine                                  |
| 474.2957 | 473.275 | -0.0134 | 474.2823 | 69  | 44.6 | Ile-Trp-Arg                                        |
| 474.2957 | 473.275 | -0.0134 | 474.2823 | 61  | 33.3 | Leu-Trp-Arg                                        |
| 474.2957 | 473.275 | -0.0134 | 474.2823 | 49  | 22.1 | Trp-Ile-Arg                                        |
| 516.3059 | 515.292 | -0.007  | 516.2989 | 87  | 100  | Taurocholic Acid                                   |
| 516.3059 | 515.292 | -0.007  | 516.2989 | 85  | 100  | Taurocholic Acid                                   |
| 516.3059 | 515.292 | -0.007  | 516.2989 | 74  | 100  | Taurocholic Acid                                   |
| 458.3162 | 435.281 | -0.0463 | 458.2699 | 50  | 100  | N-Acetyl-S-Geranylgeranyl-L-Cysteine               |
| 458.3162 | 435.281 | -0.0463 | 458.2699 | 29  | 100  | N-Acetyl-S-Geranylgeranyl-L-Cysteine               |
| 474.2957 | 473.275 | -0.0134 | 474.2823 | 35  | 100  | Ile-Trp-Arg                                        |
| 400.319  | 400.343 | 0.0231  | 400.3421 | 76  | 26.1 | Palmitoyl-L-Carnitine Cation                       |
| 400.319  | 400.343 | 0.0231  | 400.3421 | 68  | 19.4 | Palmitoyl-L-Carnitine Cation                       |
| 400.319  | 400.343 | 0.0231  | 400.3421 | 56  | 12.9 | Palmitoyl-L-Carnitine Cation                       |
| 787.6526 | 786.661 | 0.0162  | 787.6688 | 102 | 100  | N-Docosanoyl-4-                                    |



|          |         |         |          |     |      |                                                             |
|----------|---------|---------|----------|-----|------|-------------------------------------------------------------|
|          |         |         |          |     |      | Sphingeny-1-O-Phosphorylcholine                             |
| 170.1132 | 187.121 | 0.0044  | 170.1176 | 255 | 62.8 | 7-Keto-8-Aminopelargonic Acid                               |
| 170.1132 | 169.085 | -0.0208 | 170.0924 | 227 | 18.1 | L-Histidine, 3-Methyl-                                      |
| 170.1132 | 187.121 | 0.0044  | 170.1176 | 224 | 16   | 7-Keto-8-Aminopelargonic Acid                               |
| 655.4719 | 654.492 | 0.0272  | 655.4991 | 281 | 27.4 | Deca(Propylene Glycol) Monobutyl Ether                      |
| 655.4719 | 654.492 | 0.0272  | 655.4991 | 271 | 19.3 | Deca(Propylene Glycol) Monobutyl Ether                      |
| 655.4719 | 654.492 | 0.0272  | 655.4991 | 271 | 19.3 | Deca(Propylene Glycol) Monobutyl Ether                      |
| 548.3399 | 548     | 0.04    | 548.38   | 149 | 8.3  | MGDG 20:2; [M+NH4-CO] <sup>+</sup> ; MGDG(2:0/18:2(2E,4E))  |
| 548.3399 | 548     | 0.04    | 548.38   | 149 | 8.3  | MGDG 20:2; [M+NH4-CO] <sup>+</sup> ; MGDG(2:0/18:2(6Z,9Z))  |
| 548.3399 | 548     | 0.04    | 548.38   | 149 | 8.3  | MGDG 20:2; [M+NH4-CO] <sup>+</sup> ; MGDG(2:0/18:2(9E,10E)) |
| 170.116  | 187.121 | 0.0016  | 170.1176 | 15  | 100  | 7-Keto-8-Aminopelargonic Acid                               |
| 170.116  | 169.085 | -0.0236 | 170.0924 | 35  | 59.3 | L-Histidine, 1-Methyl-                                      |
| 170.116  | 169.085 | -0.0236 | 170.0924 | 35  | 59.3 | L-Histidine, 1-Methyl-                                      |
| 170.116  | 169.085 | -0.0236 | 170.0924 | 34  | 59.3 | L-Histidine, 1-Methyl-                                      |
| 170.116  | 169.074 | -0.0348 | 170.0812 | 147 | 49.1 | DL-Norepinephrine                                           |
| 170.116  | 169.085 | -0.0236 | 170.0924 | 143 | 41.5 | L-Histidine, 1-Methyl-                                      |
| 170.116  | 169.085 | -0.0236 | 170.0924 | 142 | 41.5 | L-Histidine, 1-Methyl-                                      |
| 343.31   | 342.256 | -0.0468 | 343.2632 | 174 | 100  | Retinyl Propionate                                          |
| 343.31   | 342.256 | -0.0468 | 343.2632 | 170 | 100  | Retinyl Propionate                                          |
| 343.31   | 342.256 | -0.0468 | 343.2632 | 165 | 100  | Retinyl Propionate                                          |
| 170.116  | 187.121 | 0.0016  | 170.1176 | 93  | 47.9 | 7-Keto-8-Aminopelargonic Acid                               |
| 170.116  | 187.121 | 0.0016  | 170.1176 | 80  | 30.9 | 7-Keto-8-Aminopelargonic Acid                               |
| 170.116  | 169.085 | -0.0236 | 170.0924 | 69  | 21.2 | L-Histidine, 1-Methyl-                                      |
| 655.4533 | 654.492 | 0.0458  | 655.4991 | 250 | 29.8 | Deca(Propylene Glycol) Monobutyl Ether                      |
| 655.4533 | 654.492 | 0.0458  | 655.4991 | 246 | 25.1 | Deca(Propylene Glycol) Monobutyl Ether                      |
| 655.4533 | 654.492 | 0.0458  | 655.4991 | 234 | 16.7 | Deca(Propylene Glycol) Monobutyl Ether                      |
| 170.116  | 187.121 | 0.0016  | 170.1176 | 84  | 45.7 | 7-Keto-8-Aminopelargonic Acid                               |
| 170.116  | 187.121 | 0.0016  | 170.1176 | 82  | 42.1 | 7-Keto-8-Aminopelargonic Acid                               |

|          |         |         |          |     |      |                                        |
|----------|---------|---------|----------|-----|------|----------------------------------------|
| 170.116  | 187.121 | 0.0016  | 170.1176 | 54  | 12.2 | 7-Keto-8-Aminopelargonic Acid          |
| 400.319  | 400.343 | 0.0231  | 400.3421 | 72  | 41.1 | Palmitoyl-L-Carnitine Cation           |
| 400.319  | 400.343 | 0.0231  | 400.3421 | 64  | 30.6 | Palmitoyl-L-Carnitine Cation           |
| 400.319  | 400.343 | 0.0231  | 400.3421 | 62  | 28.3 | Palmitoyl-L-Carnitine Cation           |
| 655.4719 | 654.492 | 0.0272  | 655.4991 | 224 | 24.9 | Deca(Propylene Glycol) Monobutyl Ether |
| 655.4719 | 654.492 | 0.0272  | 655.4991 | 220 | 21   | Deca(Propylene Glycol) Monobutyl Ether |
| 655.4719 | 654.492 | 0.0272  | 655.4991 | 217 | 18.6 | Deca(Propylene Glycol) Monobutyl Ether |
| 170.116  | 187.121 | 0.0016  | 170.1176 | 148 | 52.6 | 7-Keto-8-Aminopelargonic Acid          |
| 170.116  | 187.121 | 0.0016  | 170.1176 | 140 | 39.2 | 7-Keto-8-Aminopelargonic Acid          |
| 170.116  | 169.085 | -0.0236 | 170.0924 | 92  | 8.1  | L-Histidine, 1-Methyl-                 |
| 461.2907 | 460.243 | -0.04   | 461.2507 | 42  | 57.3 | Gln-Trp-Lys                            |
| 461.2907 | 460.243 | -0.04   | 461.2507 | 34  | 42.7 | Gln-Trp-Lys                            |
| 400.319  | 400.343 | 0.0231  | 400.3421 | 51  | 15.8 | Palmitoyl-L-Carnitine Cation           |
| 400.319  | 400.343 | 0.0231  | 400.3421 | 48  | 14   | Palmitoyl-L-Carnitine Cation           |
| 400.319  | 400.343 | 0.0231  | 400.3421 | 46  | 12.9 | Palmitoyl-L-Carnitine Cation           |
| 461.2907 | 460.28  | -0.0036 | 461.2871 | 41  | 100  | Trp-Lys-Lys                            |
| 170.1446 | 187.121 | -0.027  | 170.1176 | 285 | 56.5 | 7-Keto-8-Aminopelargonic Acid          |
| 170.1446 | 187.121 | -0.027  | 170.1176 | 262 | 20.6 | 7-Keto-8-Aminopelargonic Acid          |
| 170.1446 | 169.085 | -0.0522 | 170.0924 | 245 | 11.3 | L-Histidine, 3-Methyl-                 |
| 461.2907 | 230.163 | 0.0427  | 461.3334 | 295 | 59.8 | Val-Leu                                |
| 461.2907 | 230.163 | 0.0427  | 461.3334 | 283 | 39.8 | Leu-Val                                |
| 461.2907 | 230.152 | 0.0202  | 461.3109 | 40  | 0.4  | Dodecanedioic Acid                     |
| 461.2907 | 230.163 | 0.0427  | 461.3334 | 269 | 59.8 | Val-Leu                                |
| 461.2907 | 230.163 | 0.0427  | 461.3334 | 257 | 39.8 | Leu-Val                                |
| 461.2907 | 230.152 | 0.0202  | 461.3109 | 33  | 0.4  | Dodecanedioic Acid                     |
| 170.1278 | 187.121 | -0.0102 | 170.1176 | 192 | 47.6 | 7-Keto-8-Aminopelargonic Acid          |
| 170.1278 | 187.121 | -0.0102 | 170.1176 | 179 | 30.7 | 7-Keto-8-Aminopelargonic Acid          |
| 170.1278 | 169.085 | -0.0354 | 170.0924 | 162 | 16.8 | L-Histidine, 1-Methyl-                 |
| 655.4533 | 654.492 | 0.0458  | 655.4991 | 109 | 37   | Deca(Propylene Glycol) Monobutyl Ether |
| 655.4533 | 654.492 | 0.0458  | 655.4991 | 106 | 32.7 | Deca(Propylene Glycol)                 |

|          |         |         |          |     |      |                                                         |
|----------|---------|---------|----------|-----|------|---------------------------------------------------------|
|          |         |         |          |     |      | Monobutyl Ether                                         |
| 655.4533 | 654.492 | 0.0458  | 655.4991 | 104 | 30.2 | Deca(Propylene Glycol)<br>Monobutyl Ether               |
| 343.2918 | 342.256 | -0.0286 | 343.2632 | 110 | 100  | Retinyl Propionate                                      |
| 461.2907 | 230.163 | 0.0427  | 461.3334 | 274 | 58.4 | Val-Leu                                                 |
| 461.2907 | 230.163 | 0.0427  | 461.3334 | 264 | 41.2 | Leu-Val                                                 |
| 461.2907 | 230.152 | 0.0202  | 461.3109 | 45  | 0.4  | Dodecanedioic Acid                                      |
| 787.6804 | 786.661 | -0.0116 | 787.6688 | 70  | 39.7 | N-Docosanoyl-4-<br>Sphingenyl-1-O-<br>Phosphorylcholine |
| 787.6804 | 786.661 | -0.0116 | 787.6688 | 68  | 36.6 | N-Docosanoyl-4-<br>Sphingenyl-1-O-<br>Phosphorylcholine |
| 787.6804 | 786.661 | -0.0116 | 787.6688 | 45  | 13.4 | N-Docosanoyl-4-<br>Sphingenyl-1-O-<br>Phosphorylcholine |
| 170.1278 | 169     | -0.04   | 170.09   | 275 | 36   | 3-Methyl-L-Histidine                                    |
| 170.1278 | 169.085 | -0.0354 | 170.0924 | 270 | 29   | L-Histidine, 1-Methyl-                                  |
| 170.1278 | 169.085 | -0.0354 | 170.0924 | 265 | 23.4 | L-Histidine, 3-Methyl-                                  |
| 655.4719 | 654.492 | 0.0272  | 655.4991 | 105 | 38.5 | Deca(Propylene Glycol)<br>Monobutyl Ether               |
| 655.4719 | 654.492 | 0.0272  | 655.4991 | 102 | 34   | Deca(Propylene Glycol)<br>Monobutyl Ether               |
| 655.4719 | 654.492 | 0.0272  | 655.4991 | 97  | 27.4 | Deca(Propylene Glycol)<br>Monobutyl Ether               |
| 343.2918 | 342.256 | -0.0286 | 343.2632 | 53  | 77.9 | Retinyl Propionate                                      |
| 343.2918 | 342.256 | -0.0286 | 343.2632 | 50  | 77.9 | Retinyl Propionate                                      |
| 343.2918 | 342.256 | -0.0286 | 343.2632 | 47  | 77.9 | Retinyl Propionate                                      |
| 787.6377 | 786.661 | 0.0311  | 787.6688 | 73  | 100  | N-Docosanoyl-4-<br>Sphingenyl-1-O-<br>Phosphorylcholine |
| 170.1278 | 187.121 | -0.0102 | 170.1176 | 163 | 54   | 7-Keto-8-Aminopelargonic<br>Acid                        |
| 170.1278 | 187.121 | -0.0102 | 170.1176 | 142 | 23   | 7-Keto-8-Aminopelargonic<br>Acid                        |
| 170.1278 | 169.085 | -0.0354 | 170.0924 | 129 | 14.8 | L-Histidine, 1-Methyl-                                  |
| 400.319  | 400.343 | 0.0231  | 400.3421 | 187 | 9.1  | Palmitoyl-L-Carnitine<br>Cation                         |
| 400.319  | 400.343 | 0.0231  | 400.3421 | 186 | 8.7  | Palmitoyl-L-Carnitine<br>Cation                         |
| 400.319  | 400.343 | 0.0231  | 400.3421 | 185 | 8.4  | Palmitoyl-L-Carnitine<br>Cation                         |
| 787.6526 | 786.661 | 0.0162  | 787.6688 | 37  | 38.7 | N-Docosanoyl-4-<br>Sphingenyl-1-O-<br>Phosphorylcholine |
| 787.6526 | 786.661 | 0.0162  | 787.6688 | 25  | 25.8 | N-Docosanoyl-4-<br>Sphingenyl-1-O-                      |

|          |         |         |          |     |      |                                                 |
|----------|---------|---------|----------|-----|------|-------------------------------------------------|
|          |         |         |          |     |      | Phosphorylcholine                               |
| 787.6526 | 786.661 | 0.0162  | 787.6688 | 20  | 20.8 | N-Docosanoyl-4-Sphinganyl-1-O-Phosphorylcholine |
| 170.1278 | 169.085 | -0.0354 | 170.0924 | 229 | 32.7 | L-Histidine, 1-Methyl-                          |
| 170.1278 | 169.085 | -0.0354 | 170.0924 | 227 | 32.7 | L-Histidine, 1-Methyl-                          |
| 170.1278 | 187.121 | -0.0102 | 170.1176 | 226 | 28.9 | 7-Keto-8-Aminopelargonic Acid                   |
| 474.2957 | 473.275 | -0.0134 | 474.2823 | 31  | 100  | Ile-Trp-Arg                                     |
| 474.2957 | 473.275 | -0.0134 | 474.2823 | 64  | 54   | Ile-Trp-Arg                                     |
| 474.2957 | 473.275 | -0.0134 | 474.2823 | 43  | 23   | Ile-Trp-Arg                                     |
| 474.2957 | 473.275 | -0.0134 | 474.2823 | 43  | 23   | Leu-Trp-Arg                                     |
| 474.2957 | 473.275 | -0.0134 | 474.2823 | 47  | 53.1 | Leu-Trp-Arg                                     |
| 474.2957 | 473.275 | -0.0134 | 474.2823 | 44  | 46.9 | Ile-Trp-Arg                                     |
| 458.3162 | 435.281 | -0.0463 | 458.2699 | 78  | 100  | N-Acetyl-S-Geranylgeranyl-L-Cysteine            |
| 474.2957 | 473.275 | -0.0134 | 474.2823 | 66  | 45.2 | Trp-Ile-Arg                                     |
| 474.2957 | 473.275 | -0.0134 | 474.2823 | 51  | 27.4 | Ile-Trp-Arg                                     |
| 474.2957 | 473.275 | -0.0134 | 474.2823 | 51  | 27.4 | Leu-Trp-Arg                                     |
| 474.2957 | 473.275 | -0.0134 | 474.2823 | 54  | 59.7 | Leu-Trp-Arg                                     |
| 474.2957 | 473.275 | -0.0134 | 474.2823 | 31  | 21.8 | Ile-Trp-Arg                                     |
| 474.2957 | 473.275 | -0.0134 | 474.2823 | 27  | 18.4 | Ile-Trp-Arg                                     |
| 474.2957 | 473.275 | -0.0134 | 474.2823 | 74  | 30.4 | Trp-Ile-Arg                                     |
| 474.2957 | 473.275 | -0.0134 | 474.2823 | 60  | 19   | Trp-Ile-Arg                                     |
| 474.2957 | 473.275 | -0.0134 | 474.2823 | 52  | 14.2 | Leu-Trp-Arg                                     |
| 474.2957 | 473.275 | -0.0134 | 474.2823 | 52  | 20.6 | Leu-Trp-Arg                                     |
| 474.2957 | 473.275 | -0.0134 | 474.2823 | 41  | 14.1 | Ile-Trp-Arg                                     |
| 474.2957 | 473.275 | -0.0134 | 474.2823 | 39  | 13   | Trp-Ile-Arg                                     |
| 474.2957 | 473.275 | -0.0134 | 474.2823 | 54  | 28.9 | Trp-Ile-Arg                                     |
| 474.2957 | 473.275 | -0.0134 | 474.2823 | 42  | 19.3 | Leu-Trp-Arg                                     |
| 474.2957 | 473.275 | -0.0134 | 474.2823 | 38  | 16.3 | Ile-Trp-Arg                                     |
| 518.3145 | 495.332 | 0.0072  | 518.3217 | 91  | 100  | 1-Hexadecanoyl-Sn-Glycero-3-Phosphocholine      |
| 474.2957 | 473.275 | -0.0134 | 474.2823 | 52  | 31.8 | Trp-Ile-Arg                                     |
| 474.2957 | 473.275 | -0.0134 | 474.2823 | 50  | 29.3 | Ile-Trp-Arg                                     |
| 474.2957 | 473.275 | -0.0134 | 474.2823 | 40  | 20.7 | Leu-Trp-Arg                                     |
| 474.2957 | 473.275 | -0.0134 | 474.2823 | 81  | 27.4 | Leu-Trp-Arg                                     |
| 474.2957 | 473.275 | -0.0134 | 474.2823 | 71  | 19.4 | Ile-Trp-Arg                                     |
| 474.2957 | 473.275 | -0.0134 | 474.2823 | 68  | 17.1 | Ile-Trp-Arg                                     |
| 400.319  | 400.343 | 0.0231  | 400.3421 | 65  | 47.4 | Palmitoyl-L-Carnitine Cation                    |
| 400.319  | 400.343 | 0.0231  | 400.3421 | 63  | 43.7 | Palmitoyl-L-Carnitine Cation                    |

|          |         |         |          |     |      |                               |
|----------|---------|---------|----------|-----|------|-------------------------------|
| 400.319  | 401.278 | -0.0485 | 400.2705 | 12  | 8.8  | Myriocin                      |
| 170.1278 | 187.121 | -0.0102 | 170.1176 | 31  | 38.4 | 7-Keto-8-Aminopelargonic Acid |
| 170.1278 | 187.121 | -0.0102 | 170.1176 | 30  | 36.9 | 7-Keto-8-Aminopelargonic Acid |
| 170.1278 | 187.121 | -0.0102 | 170.1176 | 18  | 24.6 | 7-Keto-8-Aminopelargonic Acid |
| 474.2957 | 473.275 | -0.0134 | 474.2823 | 45  | 21.2 | Leu-Trp-Arg                   |
| 474.2957 | 473.275 | -0.0134 | 474.2823 | 43  | 19.6 | Ile-Trp-Arg                   |
| 474.2957 | 473.275 | -0.0134 | 474.2823 | 38  | 15.8 | Leu-Trp-Arg                   |
| 400.319  | 400.343 | 0.0231  | 400.3421 | 58  | 47   | Palmitoyl-L-Carnitine Cation  |
| 400.319  | 400.343 | 0.0231  | 400.3421 | 56  | 43.3 | Palmitoyl-L-Carnitine Cation  |
| 400.319  | 401.278 | -0.0485 | 400.2705 | 14  | 9.7  | Myriocin                      |
| 474.2957 | 473.275 | -0.0134 | 474.2823 | 60  | 40.9 | Leu-Trp-Arg                   |
| 474.2957 | 473.275 | -0.0134 | 474.2823 | 53  | 31.4 | Ile-Trp-Arg                   |
| 474.2957 | 473.275 | -0.0134 | 474.2823 | 50  | 27.7 | Ile-Trp-Arg                   |
| 474.2957 | 473.275 | -0.0134 | 474.2823 | 31  | 22.9 | Trp-Ile-Arg                   |
| 474.2957 | 473.275 | -0.0134 | 474.2823 | 30  | 22.1 | Leu-Trp-Arg                   |
| 474.2957 | 473.275 | -0.0134 | 474.2823 | 24  | 17.3 | Ile-Trp-Arg                   |
| 170.1278 | 187.121 | -0.0102 | 170.1176 | 141 | 43.2 | 7-Keto-8-Aminopelargonic Acid |
| 170.1278 | 187.121 | -0.0102 | 170.1176 | 137 | 36.5 | 7-Keto-8-Aminopelargonic Acid |
| 170.1278 | 169.085 | -0.0354 | 170.0924 | 111 | 10.9 | L-Histidine, 1-Methyl-        |
| 170.1278 | 187.121 | -0.0102 | 170.1176 | 128 | 45.7 | 7-Keto-8-Aminopelargonic Acid |
| 170.1278 | 187.121 | -0.0102 | 170.1176 | 123 | 36.9 | 7-Keto-8-Aminopelargonic Acid |
| 170.1278 | 169.085 | -0.0354 | 170.0924 | 94  | 10.4 | L-Histidine, 1-Methyl-        |
| 170.1278 | 187.121 | -0.0102 | 170.1176 | 95  | 39.8 | 7-Keto-8-Aminopelargonic Acid |
| 170.1278 | 187.121 | -0.0102 | 170.1176 | 93  | 36.7 | 7-Keto-8-Aminopelargonic Acid |
| 170.1278 | 187.121 | -0.0102 | 170.1176 | 61  | 9.8  | 7-Keto-8-Aminopelargonic Acid |
| 414.278  | 449.314 | 0.0223  | 414.3003 | 66  | 100  | Glycodeoxycholic Acid         |
| 474.2738 | 473.275 | 0.0085  | 474.2823 | 34  | 57.3 | Trp-Ile-Arg                   |
| 474.2738 | 473.275 | 0.0085  | 474.2823 | 26  | 42.7 | Ile-Trp-Arg                   |
| 474.2957 | 473.275 | -0.0134 | 474.2823 | 77  | 76.9 | Trp-Ile-Arg                   |
| 474.2957 | 473.275 | -0.0134 | 474.2823 | 51  | 23.1 | Ile-Trp-Arg                   |
| 170.1278 | 187.121 | -0.0102 | 170.1176 | 151 | 72   | 7-Keto-8-Aminopelargonic Acid |
| 170.1278 | 187.121 | -0.0102 | 170.1176 | 126 | 22   | 7-Keto-8-Aminopelargonic Acid |

|          |         |         |          |     |      |                                      |
|----------|---------|---------|----------|-----|------|--------------------------------------|
| 170.1278 | 187.121 | -0.0102 | 170.1176 | 95  | 6    | 7-Keto-8-Aminopelargonic Acid        |
| 170.1278 | 187.121 | -0.0102 | 170.1176 | 136 | 46.6 | 7-Keto-8-Aminopelargonic Acid        |
| 170.1278 | 187.121 | -0.0102 | 170.1176 | 131 | 37.6 | 7-Keto-8-Aminopelargonic Acid        |
| 170.1278 | 187.121 | -0.0102 | 170.1176 | 99  | 10   | 7-Keto-8-Aminopelargonic Acid        |
| 474.2738 | 473.275 | 0.0085  | 474.2823 | 110 | 71.5 | Trp-Ile-Arg                          |
| 474.2738 | 473.275 | 0.0085  | 474.2823 | 67  | 15.8 | Ile-Trp-Arg                          |
| 474.2738 | 473.275 | 0.0085  | 474.2823 | 62  | 12.7 | Leu-Trp-Arg                          |
| 170.1278 | 187.121 | -0.0102 | 170.1176 | 173 | 51   | 7-Keto-8-Aminopelargonic Acid        |
| 170.1278 | 187.121 | -0.0102 | 170.1176 | 159 | 31.9 | 7-Keto-8-Aminopelargonic Acid        |
| 170.1278 | 169.085 | -0.0354 | 170.0924 | 130 | 9    | L-Histidine, 3-Methyl-               |
| 458.3162 | 435.281 | -0.0463 | 458.2699 | 102 | 100  | N-Acetyl-S-Geranylgeranyl-L-Cysteine |
| 170.1278 | 187.121 | -0.0102 | 170.1176 | 142 | 45.7 | 7-Keto-8-Aminopelargonic Acid        |
| 170.1278 | 187.121 | -0.0102 | 170.1176 | 137 | 36.9 | 7-Keto-8-Aminopelargonic Acid        |
| 170.1278 | 169.085 | -0.0354 | 170.0924 | 111 | 11   | L-Histidine, 1-Methyl-               |
| 474.2957 | 473.275 | -0.0134 | 474.2823 | 44  | 57.9 | Ile-Trp-Arg                          |
| 474.2957 | 473.275 | -0.0134 | 474.2823 | 35  | 42.1 | Trp-Ile-Arg                          |
| 458.2757 | 435.281 | -0.0058 | 458.2699 | 101 | 100  | N-Acetyl-S-Geranylgeranyl-L-Cysteine |
| 400.319  | 400.343 | 0.0231  | 400.3421 | 55  | 80.2 | Palmitoyl-L-Carnitine Cation         |
| 400.319  | 401.278 | -0.0485 | 400.2705 | 19  | 19.8 | Myriocin                             |
| 400.319  | 401.278 | -0.0485 | 400.2705 | 16  | 19.8 | Myriocin                             |
| 170.1278 | 169.085 | -0.0354 | 170.0924 | 130 | 31.6 | L-Histidine, 1-Methyl-               |
| 170.1278 | 169.085 | -0.0354 | 170.0924 | 128 | 31.6 | L-Histidine, 1-Methyl-               |
| 170.1278 | 169.085 | -0.0354 | 170.0924 | 126 | 31.6 | L-Histidine, 1-Methyl-               |
| 458.3162 | 435.281 | -0.0463 | 458.2699 | 78  | 100  | N-Acetyl-S-Geranylgeranyl-L-Cysteine |
| 458.3162 | 435.281 | -0.0463 | 458.2699 | 72  | 100  | N-Acetyl-S-Geranylgeranyl-L-Cysteine |
| 458.3162 | 435.281 | -0.0463 | 458.2699 | 39  | 100  | N-Acetyl-S-Geranylgeranyl-L-Cysteine |
| 343.2759 | 342.256 | -0.0127 | 343.2632 | 161 | 93.2 | Retinyl Propionate                   |
| 343.2759 | 342.256 | -0.0127 | 343.2632 | 155 | 93.2 | Retinyl Propionate                   |
| 343.2759 | 342.256 | -0.0127 | 343.2632 | 127 | 93.2 | Retinyl Propionate                   |
| 170.1278 | 187.121 | -0.0102 | 170.1176 | 143 | 32.3 | 7-Keto-8-Aminopelargonic Acid        |
| 170.1278 | 187.121 | -0.0102 | 170.1176 | 141 | 29.8 | 7-Keto-8-Aminopelargonic Acid        |

|          |         |         |          |     |      |                                            |
|----------|---------|---------|----------|-----|------|--------------------------------------------|
| 170.1278 | 169.085 | -0.0354 | 170.0924 | 133 | 22.2 | L-Histidine, 1-Methyl-                     |
| 458.3162 | 435.281 | -0.0463 | 458.2699 | 62  | 100  | N-Acetyl-S-Geranylgeranyl-L-Cysteine       |
| 458.3162 | 435.281 | -0.0463 | 458.2699 | 61  | 100  | N-Acetyl-S-Geranylgeranyl-L-Cysteine       |
| 458.3162 | 435.281 | -0.0463 | 458.2699 | 54  | 100  | N-Acetyl-S-Geranylgeranyl-L-Cysteine       |
| 170.1278 | 187.121 | -0.0102 | 170.1176 | 151 | 30.3 | 7-Keto-8-Aminopelargonic Acid              |
| 170.1278 | 169.085 | -0.0354 | 170.0924 | 148 | 26.8 | L-Histidine, 1-Methyl-                     |
| 170.1278 | 169.085 | -0.0354 | 170.0924 | 144 | 22.6 | L-Histidine, 3-Methyl-                     |
| 474.2957 | 473.275 | -0.0134 | 474.2823 | 72  | 100  | Leu-Trp-Arg                                |
| 458.3162 | 435.281 | -0.0463 | 458.2699 | 32  | 100  | N-Acetyl-S-Geranylgeranyl-L-Cysteine       |
| 458.3162 | 435.281 | -0.0463 | 458.2699 | 25  | 100  | N-Acetyl-S-Geranylgeranyl-L-Cysteine       |
| 458.3162 | 435.281 | -0.0463 | 458.2699 | 18  | 100  | N-Acetyl-S-Geranylgeranyl-L-Cysteine       |
| 170.1278 | 187.121 | -0.0102 | 170.1176 | 162 | 45.6 | 7-Keto-8-Aminopelargonic Acid              |
| 170.1278 | 187.121 | -0.0102 | 170.1176 | 150 | 30.4 | 7-Keto-8-Aminopelargonic Acid              |
| 170.1278 | 187.121 | -0.0102 | 170.1176 | 104 | 6.4  | 7-Keto-8-Aminopelargonic Acid              |
| 400.319  | 401.278 | -0.0485 | 400.2705 | 103 | 100  | Myriocin                                   |
| 400.319  | 401.278 | -0.0485 | 400.2705 | 102 | 100  | Myriocin                                   |
| 170.1278 | 187.121 | -0.0102 | 170.1176 | 148 | 44.6 | 7-Keto-8-Aminopelargonic Acid              |
| 170.1278 | 187.121 | -0.0102 | 170.1176 | 142 | 35.1 | 7-Keto-8-Aminopelargonic Acid              |
| 170.1278 | 187.121 | -0.0102 | 170.1176 | 87  | 6.8  | 7-Keto-8-Aminopelargonic Acid              |
| 458.2549 | 435.281 | 0.015   | 458.2699 | 69  | 100  | N-Acetyl-S-Geranylgeranyl-L-Cysteine       |
| 170.1278 | 187.121 | -0.0102 | 170.1176 | 143 | 40.2 | 7-Keto-8-Aminopelargonic Acid              |
| 170.1278 | 187.121 | -0.0102 | 170.1176 | 141 | 37   | 7-Keto-8-Aminopelargonic Acid              |
| 170.1278 | 187.121 | -0.0102 | 170.1176 | 100 | 8.4  | 7-Keto-8-Aminopelargonic Acid              |
| 518.3145 | 495.332 | 0.0072  | 518.3217 | 66  | 100  | 1-Hexadecanoyl-Sn-Glycero-3-Phosphocholine |
| 170.1278 | 187.121 | -0.0102 | 170.1176 | 161 | 37.6 | 7-Keto-8-Aminopelargonic Acid              |
| 170.1278 | 169.085 | -0.0354 | 170.0924 | 146 | 22.8 | L-Histidine, 3-Methyl-                     |
| 170.1278 | 187.121 | -0.0102 | 170.1176 | 141 | 18.4 | 7-Keto-8-Aminopelargonic Acid              |
| 170.1278 | 187.121 | -0.0102 | 170.1176 | 140 | 42   | 7-Keto-8-Aminopelargonic                   |

|          |         |         |          |     |      |                                      |
|----------|---------|---------|----------|-----|------|--------------------------------------|
|          |         |         |          |     |      | Acid                                 |
| 170.1278 | 187.121 | -0.0102 | 170.1176 | 137 | 37.1 | 7-Keto-8-Aminopelargonic Acid        |
| 170.1278 | 169.085 | -0.0354 | 170.0924 | 99  | 8.9  | L-Histidine, 1-Methyl-               |
| 474.2957 | 473.275 | -0.0134 | 474.2823 | 52  | 63.5 | Leu-Trp-Arg                          |
| 474.2957 | 473.275 | -0.0134 | 474.2823 | 36  | 36.5 | Ile-Trp-Arg                          |
| 170.1278 | 169.085 | -0.0354 | 170.0924 | 160 | 35.9 | L-Histidine, 3-Methyl-               |
| 170.1278 | 169.085 | -0.0354 | 170.0924 | 160 | 35.9 | L-Histidine, 3-Methyl-               |
| 170.1278 | 169.085 | -0.0354 | 170.0924 | 158 | 35.9 | L-Histidine, 3-Methyl-               |
| 458.3162 | 435.281 | -0.0463 | 458.2699 | 40  | 100  | N-Acetyl-S-Geranylgeranyl-L-Cysteine |
| 170.1278 | 187.121 | -0.0102 | 170.1176 | 156 | 45.2 | 7-Keto-8-Aminopelargonic Acid        |
| 170.1278 | 187.121 | -0.0102 | 170.1176 | 156 | 45.2 | 7-Keto-8-Aminopelargonic Acid        |
| 170.1278 | 187.121 | -0.0102 | 170.1176 | 111 | 9.6  | 7-Keto-8-Aminopelargonic Acid        |
| 458.3162 | 435.281 | -0.0463 | 458.2699 | 37  | 100  | N-Acetyl-S-Geranylgeranyl-L-Cysteine |
| 400.36   | 400.343 | -0.0179 | 400.3421 | 25  | 56.6 | Palmitoyl-L-Carnitine Cation         |
| 400.36   | 400.343 | -0.0179 | 400.3421 | 18  | 43.4 | Palmitoyl-L-Carnitine Cation         |
| 170.1278 | 187.121 | -0.0102 | 170.1176 | 170 | 50.5 | 7-Keto-8-Aminopelargonic Acid        |
| 170.1278 | 187.121 | -0.0102 | 170.1176 | 161 | 36.7 | 7-Keto-8-Aminopelargonic Acid        |
| 170.1278 | 187.121 | -0.0102 | 170.1176 | 113 | 7.6  | 7-Keto-8-Aminopelargonic Acid        |
| 400.319  | 401.278 | -0.0485 | 400.2705 | 16  | 100  | Myriocin                             |
| 343.2918 | 342.256 | -0.0286 | 343.2632 | 81  | 100  | Retinyl Propionate                   |
| 170.1278 | 187.121 | -0.0102 | 170.1176 | 190 | 66.2 | 7-Keto-8-Aminopelargonic Acid        |
| 170.1278 | 187.121 | -0.0102 | 170.1176 | 169 | 28.2 | 7-Keto-8-Aminopelargonic Acid        |
| 170.1278 | 187.121 | -0.0102 | 170.1176 | 117 | 5.6  | 7-Keto-8-Aminopelargonic Acid        |
| 474.2957 | 473.275 | -0.0134 | 474.2823 | 47  | 100  | Ile-Trp-Arg                          |
| 170.1278 | 187.121 | -0.0102 | 170.1176 | 165 | 48.8 | 7-Keto-8-Aminopelargonic Acid        |
| 170.1278 | 187.121 | -0.0102 | 170.1176 | 160 | 39.3 | 7-Keto-8-Aminopelargonic Acid        |
| 170.1278 | 169.085 | -0.0354 | 170.0924 | 116 | 8.5  | L-Histidine, 1-Methyl-               |
| 400.319  | 400.343 | 0.0231  | 400.3421 | 72  | 26.5 | Palmitoyl-L-Carnitine Cation         |
| 400.319  | 400.343 | 0.0231  | 400.3421 | 68  | 22.4 | Palmitoyl-L-Carnitine Cation         |



|          |         |         |          |     |      |                                            |
|----------|---------|---------|----------|-----|------|--------------------------------------------|
| 400.319  | 400.343 | 0.0231  | 400.3421 | 66  | 20.6 | Palmitoyl-L-Carnitine Cation               |
| 474.2957 | 473.275 | -0.0134 | 474.2823 | 43  | 38.5 | Leu-Trp-Arg                                |
| 474.2957 | 473.275 | -0.0134 | 474.2823 | 40  | 34   | Ile-Trp-Arg                                |
| 474.2957 | 473.275 | -0.0134 | 474.2823 | 35  | 27.4 | Ile-Trp-Arg                                |
| 170.1278 | 187.121 | -0.0102 | 170.1176 | 235 | 73.6 | 7-Keto-8-Aminopelargonic Acid              |
| 170.1278 | 187.121 | -0.0102 | 170.1176 | 200 | 18.5 | 7-Keto-8-Aminopelargonic Acid              |
| 170.1278 | 169.085 | -0.0354 | 170.0924 | 154 | 3.9  | L-Histidine, 1-Methyl-                     |
| 518.3145 | 495.332 | 0.0072  | 518.3217 | 104 | 100  | 1-Hexadecanoyl-Sn-Glycero-3-Phosphocholine |
| 400.319  | 400.343 | 0.0231  | 400.3421 | 119 | 30.9 | Palmitoyl-L-Carnitine Cation               |
| 400.319  | 400.343 | 0.0231  | 400.3421 | 117 | 28.5 | Palmitoyl-L-Carnitine Cation               |
| 400.319  | 400.343 | 0.0231  | 400.3421 | 111 | 22.4 | Palmitoyl-L-Carnitine Cation               |
| 170.1278 | 187.121 | -0.0102 | 170.1176 | 185 | 52.3 | 7-Keto-8-Aminopelargonic Acid              |
| 170.1278 | 187.121 | -0.0102 | 170.1176 | 175 | 36.9 | 7-Keto-8-Aminopelargonic Acid              |
| 170.1278 | 187.121 | -0.0102 | 170.1176 | 129 | 7.8  | 7-Keto-8-Aminopelargonic Acid              |
| 400.319  | 400.343 | 0.0231  | 400.3421 | 96  | 36.3 | Palmitoyl-L-Carnitine Cation               |
| 400.319  | 400.343 | 0.0231  | 400.3421 | 92  | 30.7 | Palmitoyl-L-Carnitine Cation               |
| 400.319  | 400.343 | 0.0231  | 400.3421 | 91  | 29.5 | Palmitoyl-L-Carnitine Cation               |
| 170.1278 | 187.121 | -0.0102 | 170.1176 | 165 | 49.4 | 7-Keto-8-Aminopelargonic Acid              |
| 170.1278 | 187.121 | -0.0102 | 170.1176 | 155 | 34.9 | 7-Keto-8-Aminopelargonic Acid              |
| 170.1278 | 169.085 | -0.0354 | 170.0924 | 106 | 7.2  | L-Histidine, 1-Methyl-                     |
| 170.1278 | 187.121 | -0.0102 | 170.1176 | 202 | 40   | 7-Keto-8-Aminopelargonic Acid              |
| 170.1278 | 187.121 | -0.0102 | 170.1176 | 201 | 38.4 | 7-Keto-8-Aminopelargonic Acid              |
| 170.1278 | 169.085 | -0.0354 | 170.0924 | 149 | 7.7  | L-Histidine, 3-Methyl-                     |
| 400.319  | 400.343 | 0.0231  | 400.3421 | 159 | 84.5 | Palmitoyl-L-Carnitine Cation               |
| 400.319  | 400.343 | 0.0231  | 400.3421 | 60  | 6.4  | Palmitoyl-L-Carnitine Cation               |
| 400.319  | 400.343 | 0.0231  | 400.3421 | 54  | 5    | Palmitoyl-L-Carnitine Cation               |
| 655.4719 | 654.492 | 0.0272  | 655.4991 | 151 | 51.2 | Deca(Propylene Glycol) Monobutyl Ether     |

|          |         |         |          |     |      |                                                   |
|----------|---------|---------|----------|-----|------|---------------------------------------------------|
| 655.4719 | 654.492 | 0.0272  | 655.4991 | 134 | 27.9 | Deca(Propylene Glycol) Monobutyl Ether            |
| 655.4719 | 654.492 | 0.0272  | 655.4991 | 126 | 20.8 | Deca(Propylene Glycol) Monobutyl Ether            |
| 170.1278 | 187.121 | -0.0102 | 170.1176 | 189 | 48.1 | 7-Keto-8-Aminopelargonic Acid                     |
| 170.1278 | 187.121 | -0.0102 | 170.1176 | 184 | 38.8 | 7-Keto-8-Aminopelargonic Acid                     |
| 170.1278 | 169.085 | -0.0354 | 170.0924 | 120 | 6.4  | L-Histidine, 1-Methyl-                            |
| 414.278  | 413.239 | -0.0321 | 414.2459 | 70  | 100  | Pyroglu-Lys-Arg                                   |
| 370.2514 | 370     | -0.04   | 370.21   | 88  | 39.3 | MGDG 7:0; [M+NH4-CO] <sup>+</sup> ; MGDG(2:0/5:0) |
| 370.2514 | 370     | -0.04   | 370.21   | 88  | 39.3 | MGDG 7:0; [M+NH4-CO] <sup>+</sup> ; MGDG(5:0/2:0) |
| 370.2514 | 370     | -0.04   | 370.21   | 57  | 10.7 | MGDG 7:0; [M+NH4-CO] <sup>+</sup> ; MGDG(3:0/4:0) |
| 400.319  | 400.343 | 0.0231  | 400.3421 | 39  | 28.8 | Palmitoyl-L-Carnitine Cation                      |
| 400.319  | 400.343 | 0.0231  | 400.3421 | 38  | 27.7 | Palmitoyl-L-Carnitine Cation                      |
| 400.319  | 400.343 | 0.0231  | 400.3421 | 32  | 21.8 | Palmitoyl-L-Carnitine Cation                      |
| 170.1278 | 187.121 | -0.0102 | 170.1176 | 194 | 41.3 | 7-Keto-8-Aminopelargonic Acid                     |
| 170.1278 | 187.121 | -0.0102 | 170.1176 | 189 | 33.3 | 7-Keto-8-Aminopelargonic Acid                     |
| 170.1278 | 187.121 | -0.0102 | 170.1176 | 137 | 6.6  | 7-Keto-8-Aminopelargonic Acid                     |
| 414.278  | 413.239 | -0.0321 | 414.2459 | 59  | 55.4 | Pyroglu-Lys-Arg                                   |
| 414.278  | 413.239 | -0.0321 | 414.2459 | 54  | 44.6 | Pyroglu-Lys-Arg                                   |
| 458.2953 | 457.244 | -0.044  | 458.251  | 59  | 67.1 | Pro-Trp-Arg                                       |
| 458.2953 | 457.244 | -0.044  | 458.251  | 34  | 20.5 | Pro-Trp-Arg                                       |
| 458.2953 | 457.244 | -0.044  | 458.251  | 19  | 12.4 | Trp-Pro-Arg                                       |
| 343.2918 | 342.256 | -0.0286 | 343.2632 | 156 | 93.4 | Retinyl Propionate                                |
| 343.2918 | 408.288 | -0.0275 | 343.2643 | 53  | 6.6  | Cholic Acid                                       |
| 343.2918 | 408.288 | -0.0275 | 343.2643 | 53  | 6.6  | Cholic Acid                                       |
| 458.2953 | 457.244 | -0.044  | 458.251  | 90  | 31.9 | Pro-Trp-Arg                                       |
| 458.2953 | 435.281 | -0.0254 | 458.2699 | 77  | 20.6 | N-Acetyl-S-Geranylgeranyl-L-Cysteine              |
| 458.2953 | 457.244 | -0.044  | 458.251  | 69  | 15.4 | Pro-Trp-Arg                                       |
| 170.1278 | 187.121 | -0.0102 | 170.1176 | 198 | 50.9 | 7-Keto-8-Aminopelargonic Acid                     |
| 170.1278 | 187.121 | -0.0102 | 170.1176 | 188 | 35.9 | 7-Keto-8-Aminopelargonic Acid                     |
| 170.1278 | 169.074 | -0.0466 | 170.0812 | 124 | 5.9  | Pyridoxine                                        |
| 370.2514 | 370     | -0.04   | 370.21   | 182 | 37   | MGDG 7:0; [M+NH4-CO] <sup>+</sup> ; MGDG(2:0/5:0) |

|          |         |         |          |     |      |                                                      |
|----------|---------|---------|----------|-----|------|------------------------------------------------------|
| 370.2514 | 370     | -0.04   | 370.21   | 182 | 37   | MGDG 7:0; [M+NH4-CO] <sup>+</sup> ;<br>MGDG(5:0/2:0) |
| 370.2514 | 369.288 | 0.0438  | 370.2952 | 124 | 6.8  | N-Oleoyl-L-Serine                                    |
| 474.2957 | 473.275 | -0.0134 | 474.2823 | 47  | 35.6 | Ile-Trp-Arg                                          |
| 474.2957 | 473.275 | -0.0134 | 474.2823 | 47  | 35.6 | Leu-Trp-Arg                                          |
| 474.2957 | 473.275 | -0.0134 | 474.2823 | 42  | 28.7 | Trp-Ile-Arg                                          |
| 458.2953 | 457.244 | -0.044  | 458.251  | 130 | 23   | Pro-Trp-Arg                                          |
| 458.2953 | 457.244 | -0.044  | 458.251  | 126 | 19.5 | Trp-Pro-Arg                                          |
| 458.2953 | 457.244 | -0.044  | 458.251  | 122 | 16.4 | Trp-Pro-Arg                                          |
| 170.1278 | 169.085 | -0.0354 | 170.0924 | 208 | 32.3 | L-Histidine, 1-Methyl-                               |
| 170.1278 | 169.085 | -0.0354 | 170.0924 | 207 | 31.1 | L-Histidine, 3-Methyl-                               |
| 170.1278 | 169.085 | -0.0354 | 170.0924 | 207 | 31.1 | L-Histidine, 3-Methyl-                               |
| 170.1278 | 187.121 | -0.0102 | 170.1176 | 155 | 49.3 | 7-Keto-8-Aminopelargonic<br>Acid                     |
| 170.1278 | 187.121 | -0.0102 | 170.1176 | 151 | 41.6 | 7-Keto-8-Aminopelargonic<br>Acid                     |
| 170.1278 | 187.121 | -0.0102 | 170.1176 | 92  | 7.5  | 7-Keto-8-Aminopelargonic<br>Acid                     |
| 458.2953 | 435.281 | -0.0254 | 458.2699 | 80  | 81.9 | N-Acetyl-S-Geranylgeranyl-<br>L-Cysteine             |
| 458.2953 | 435.281 | -0.0254 | 458.2699 | 75  | 81.9 | N-Acetyl-S-Geranylgeranyl-<br>L-Cysteine             |
| 458.2953 | 435.281 | -0.0254 | 458.2699 | 57  | 81.9 | N-Acetyl-S-Geranylgeranyl-<br>L-Cysteine             |
| 170.1278 | 187.121 | -0.0102 | 170.1176 | 174 | 51   | 7-Keto-8-Aminopelargonic<br>Acid                     |
| 170.1278 | 187.121 | -0.0102 | 170.1176 | 163 | 35   | 7-Keto-8-Aminopelargonic<br>Acid                     |
| 170.1278 | 187.121 | -0.0102 | 170.1176 | 137 | 10.5 | 7-Keto-8-Aminopelargonic<br>Acid                     |
| 458.2953 | 435.281 | -0.0254 | 458.2699 | 70  | 83.8 | N-Acetyl-S-Geranylgeranyl-<br>L-Cysteine             |
| 458.2953 | 457.244 | -0.044  | 458.251  | 15  | 16.2 | Trp-Pro-Arg                                          |
| 474.2957 | 473.275 | -0.0134 | 474.2823 | 23  | 56.6 | Ile-Trp-Arg                                          |
| 474.2957 | 473.275 | -0.0134 | 474.2823 | 16  | 43.4 | Ile-Trp-Arg                                          |
| 170.1278 | 169.085 | -0.0354 | 170.0924 | 218 | 47.4 | L-Histidine, 1-Methyl-                               |
| 170.1278 | 169.085 | -0.0354 | 170.0924 | 217 | 47.4 | L-Histidine, 1-Methyl-                               |
| 170.1278 | 169.085 | -0.0354 | 170.0924 | 208 | 33.5 | L-Histidine, 3-Methyl-                               |
| 474.2957 | 473.275 | -0.0134 | 474.2823 | 36  | 100  | Ile-Trp-Arg                                          |
| 370.2244 | 370     | -0.01   | 370.21   | 200 | 50   | MGDG 7:0; [M+NH4-CO] <sup>+</sup> ;<br>MGDG(2:0/5:0) |
| 370.2244 | 370     | -0.01   | 370.21   | 200 | 50   | MGDG 7:0; [M+NH4-CO] <sup>+</sup> ;<br>MGDG(5:0/2:0) |
| 170.1278 | 187.121 | -0.0102 | 170.1176 | 223 | 57.4 | 7-Keto-8-Aminopelargonic<br>Acid                     |
| 170.1278 | 187.121 | -0.0102 | 170.1176 | 207 | 33.1 | 7-Keto-8-Aminopelargonic                             |

|          |         |         |          |     |      |                                            |
|----------|---------|---------|----------|-----|------|--------------------------------------------|
|          |         |         |          |     |      | Acid                                       |
| 170.1278 | 187.121 | -0.0102 | 170.1176 | 160 | 6.9  | 7-Keto-8-Aminopelargonic Acid              |
| 518.3145 | 495.332 | 0.0072  | 518.3217 | 94  | 100  | 1-Hexadecanoyl-Sn-Glycero-3-Phosphocholine |
| 170.1278 | 169.085 | -0.0354 | 170.0924 | 193 | 36   | L-Histidine, 3-Methyl-                     |
| 170.1278 | 169.085 | -0.0354 | 170.0924 | 182 | 24.7 | L-Histidine, 1-Methyl-                     |
| 170.1278 | 187.121 | -0.0102 | 170.1176 | 179 | 21.8 | 7-Keto-8-Aminopelargonic Acid              |
| 458.3162 | 435.281 | -0.0463 | 458.2699 | 13  | 100  | N-Acetyl-S-Geranylgeranyl-L-Cysteine       |
| 170.1278 | 187.121 | -0.0102 | 170.1176 | 192 | 36.9 | 7-Keto-8-Aminopelargonic Acid              |
| 170.1278 | 169.085 | -0.0354 | 170.0924 | 190 | 34   | L-Histidine, 1-Methyl-                     |
| 170.1278 | 169.085 | -0.0354 | 170.0924 | 186 | 34   | L-Histidine, 1-Methyl-                     |
| 474.2957 | 473.275 | -0.0134 | 474.2823 | 33  | 100  | Leu-Trp-Arg                                |
| 170.1278 | 187.121 | -0.0102 | 170.1176 | 189 | 45   | 7-Keto-8-Aminopelargonic Acid              |
| 170.1278 | 187.121 | -0.0102 | 170.1176 | 174 | 27.3 | 7-Keto-8-Aminopelargonic Acid              |
| 170.1278 | 169.085 | -0.0354 | 170.0924 | 158 | 15.7 | L-Histidine, 1-Methyl-                     |
| 474.2957 | 473.275 | -0.0134 | 474.2823 | 37  | 25.7 | Ile-Trp-Arg                                |
| 474.2957 | 473.275 | -0.0134 | 474.2823 | 34  | 22.7 | Leu-Trp-Arg                                |
| 474.2957 | 473.275 | -0.0134 | 474.2823 | 30  | 19.2 | Ile-Trp-Arg                                |
| 170.1278 | 187.121 | -0.0102 | 170.1176 | 146 | 44.1 | 7-Keto-8-Aminopelargonic Acid              |
| 170.1278 | 187.121 | -0.0102 | 170.1176 | 141 | 35.5 | 7-Keto-8-Aminopelargonic Acid              |
| 170.1278 | 169.085 | -0.0354 | 170.0924 | 95  | 7.5  | L-Histidine, 1-Methyl-                     |
| 170.1278 | 187.121 | -0.0102 | 170.1176 | 181 | 38.4 | 7-Keto-8-Aminopelargonic Acid              |
| 170.1278 | 187.121 | -0.0102 | 170.1176 | 178 | 34   | 7-Keto-8-Aminopelargonic Acid              |
| 170.1278 | 169.085 | -0.0354 | 170.0924 | 146 | 9.1  | L-Histidine, 1-Methyl-                     |
| 458.2953 | 435.281 | -0.0254 | 458.2699 | 50  | 77.3 | N-Acetyl-S-Geranylgeranyl-L-Cysteine       |
| 458.2953 | 457.244 | -0.044  | 458.251  | 23  | 22.7 | Trp-Pro-Arg                                |
| 474.2957 | 473.275 | -0.0134 | 474.2823 | 36  | 100  | Leu-Trp-Arg                                |
| 170.1278 | 169.085 | -0.0354 | 170.0924 | 250 | 37.9 | L-Histidine, 1-Methyl-                     |
| 170.1278 | 187.121 | -0.0102 | 170.1176 | 245 | 30.5 | 7-Keto-8-Aminopelargonic Acid              |
| 170.1278 | 169.085 | -0.0354 | 170.0924 | 243 | 37.9 | L-Histidine, 1-Methyl-                     |
| 170.1278 | 187.121 | -0.0102 | 170.1176 | 221 | 44.7 | 7-Keto-8-Aminopelargonic Acid              |
| 170.1278 | 187.121 | -0.0102 | 170.1176 | 218 | 39.5 | 7-Keto-8-Aminopelargonic Acid              |

|          |         |         |          |     |      |                                                   |
|----------|---------|---------|----------|-----|------|---------------------------------------------------|
| 170.1278 | 169.085 | -0.0354 | 170.0924 | 152 | 6.2  | L-Histidine, 1-Methyl-                            |
| 458.3162 | 435.281 | -0.0463 | 458.2699 | 21  | 100  | N-Acetyl-S-Geranylgeranyl-L-Cysteine              |
| 170.1278 | 187.121 | -0.0102 | 170.1176 | 241 | 41.9 | 7-Keto-8-Aminopelargonic Acid                     |
| 170.1278 | 187.121 | -0.0102 | 170.1176 | 237 | 35.4 | 7-Keto-8-Aminopelargonic Acid                     |
| 170.1278 | 169.085 | -0.0354 | 170.0924 | 218 | 17.2 | L-Histidine, 1-Methyl-                            |
| 170.1278 | 187.121 | -0.0102 | 170.1176 | 177 | 48.1 | 7-Keto-8-Aminopelargonic Acid                     |
| 170.1278 | 187.121 | -0.0102 | 170.1176 | 172 | 38.8 | 7-Keto-8-Aminopelargonic Acid                     |
| 170.1278 | 169.085 | -0.0354 | 170.0924 | 122 | 7.9  | L-Histidine, 1-Methyl-                            |
| 370.2514 | 370     | -0.04   | 370.21   | 152 | 38.1 | MGDG 7:0; [M+NH4-CO] <sup>+</sup> ; MGDG(2:0/5:0) |
| 370.2514 | 370     | -0.04   | 370.21   | 152 | 38.1 | MGDG 7:0; [M+NH4-CO] <sup>+</sup> ; MGDG(5:0/2:0) |
| 370.2514 | 369.288 | 0.0438  | 370.2952 | 66  | 3.4  | N-Oleoyl-L-Serine                                 |
| 170.1278 | 187.121 | -0.0102 | 170.1176 | 163 | 51.9 | 7-Keto-8-Aminopelargonic Acid                     |
| 170.1278 | 187.121 | -0.0102 | 170.1176 | 138 | 15.8 | 7-Keto-8-Aminopelargonic Acid                     |
| 170.1278 | 169.085 | -0.0354 | 170.0924 | 138 | 15.8 | L-Histidine, 1-Methyl-                            |
| 170.1278 | 187.121 | -0.0102 | 170.1176 | 288 | 67.7 | 7-Keto-8-Aminopelargonic Acid                     |
| 170.1278 | 187.121 | -0.0102 | 170.1176 | 265 | 24.7 | 7-Keto-8-Aminopelargonic Acid                     |
| 170.1278 | 187.121 | -0.0102 | 170.1176 | 223 | 5.5  | 7-Keto-8-Aminopelargonic Acid                     |
| 414.2587 | 413.239 | -0.0128 | 414.2459 | 77  | 100  | Pyroglu-Lys-Arg                                   |
| 170.1278 | 187.121 | -0.0102 | 170.1176 | 216 | 47.7 | 7-Keto-8-Aminopelargonic Acid                     |
| 170.1278 | 187.121 | -0.0102 | 170.1176 | 207 | 34.6 | 7-Keto-8-Aminopelargonic Acid                     |
| 170.1278 | 169.085 | -0.0354 | 170.0924 | 184 | 12.6 | L-Histidine, 1-Methyl-                            |
| 170.1278 | 187.121 | -0.0102 | 170.1176 | 209 | 47.1 | 7-Keto-8-Aminopelargonic Acid                     |
| 170.1278 | 187.121 | -0.0102 | 170.1176 | 206 | 41.6 | 7-Keto-8-Aminopelargonic Acid                     |
| 170.1278 | 187.121 | -0.0102 | 170.1176 | 149 | 7.8  | 7-Keto-8-Aminopelargonic Acid                     |
| 170.1278 | 187.121 | -0.0102 | 170.1176 | 185 | 44   | 7-Keto-8-Aminopelargonic Acid                     |
| 170.1278 | 187.121 | -0.0102 | 170.1176 | 183 | 40.6 | 7-Keto-8-Aminopelargonic Acid                     |
| 170.1278 | 169.085 | -0.0354 | 170.0924 | 145 | 9.7  | L-Histidine, 1-Methyl-                            |
| 170.1278 | 187.121 | -0.0102 | 170.1176 | 189 | 68.4 | 7-Keto-8-Aminopelargonic Acid                     |

|          |         |         |          |     |      |                                                                |
|----------|---------|---------|----------|-----|------|----------------------------------------------------------------|
| 170.1278 | 187.121 | -0.0102 | 170.1176 | 160 | 19.4 | 7-Keto-8-Aminopelargonic Acid                                  |
| 170.1278 | 169.085 | -0.0354 | 170.0924 | 136 | 6.5  | L-Histidine, 3-Methyl-                                         |
| 170.1278 | 187.121 | -0.0102 | 170.1176 | 180 | 41.1 | 7-Keto-8-Aminopelargonic Acid                                  |
| 170.1278 | 187.121 | -0.0102 | 170.1176 | 171 | 29.8 | 7-Keto-8-Aminopelargonic Acid                                  |
| 170.1278 | 169.085 | -0.0354 | 170.0924 | 162 | 21.6 | L-Histidine, 3-Methyl-                                         |
| 474.2957 | 473.275 | -0.0134 | 474.2823 | 73  | 42.6 | Leu-Trp-Arg                                                    |
| 474.2957 | 473.275 | -0.0134 | 474.2823 | 58  | 25.8 | Ile-Trp-Arg                                                    |
| 474.2957 | 473.275 | -0.0134 | 474.2823 | 44  | 16.1 | Ile-Trp-Arg                                                    |
| 370.2244 | 370     | -0.01   | 370.21   | 150 | 38.5 | MGDG 7:0; [M+NH <sub>4</sub> -CO] <sup>+</sup> ; MGDG(2:0/5:0) |
| 370.2244 | 370     | -0.01   | 370.21   | 150 | 38.5 | MGDG 7:0; [M+NH <sub>4</sub> -CO] <sup>+</sup> ; MGDG(5:0/2:0) |
| 370.2244 | 370     | -0.05   | 370.17   | 124 | 11.5 | MGDG 5:0; [M+NH <sub>4</sub> ] <sup>+</sup> ; MGDG(2:0/3:0)    |
| 170.1278 | 187.121 | -0.0102 | 170.1176 | 191 | 29.9 | 7-Keto-8-Aminopelargonic Acid                                  |
| 170.1278 | 187.121 | -0.0102 | 170.1176 | 188 | 26.4 | 7-Keto-8-Aminopelargonic Acid                                  |
| 170.1278 | 169.085 | -0.0354 | 170.0924 | 187 | 25.4 | L-Histidine, 1-Methyl-                                         |
| 472.2733 | 471.223 | -0.043  | 472.2303 | 39  | 100  | Pyroglu-Trp-Arg                                                |
| 170.1278 | 169.085 | -0.0354 | 170.0924 | 211 | 31.1 | L-Histidine, 3-Methyl-                                         |
| 170.1278 | 187.121 | -0.0102 | 170.1176 | 204 | 23.8 | 7-Keto-8-Aminopelargonic Acid                                  |
| 170.1278 | 187.121 | -0.0102 | 170.1176 | 194 | 16.8 | 7-Keto-8-Aminopelargonic Acid                                  |
| 655.5145 | 654.492 | -0.0154 | 655.4991 | 243 | 27.8 | Deca(Propylene Glycol) Monobutyl Ether                         |
| 655.5145 | 654.492 | -0.0154 | 655.4991 | 233 | 19.6 | Deca(Propylene Glycol) Monobutyl Ether                         |
| 655.5145 | 654.492 | -0.0154 | 655.4991 | 230 | 17.3 | Deca(Propylene Glycol) Monobutyl Ether                         |
| 370.2514 | 370     | -0.04   | 370.21   | 169 | 24.2 | MGDG 7:0; [M+NH <sub>4</sub> -CO] <sup>+</sup> ; MGDG(2:0/5:0) |
| 370.2514 | 370     | -0.04   | 370.21   | 169 | 24.2 | MGDG 7:0; [M+NH <sub>4</sub> -CO] <sup>+</sup> ; MGDG(5:0/2:0) |
| 370.2514 | 369.288 | 0.0438  | 370.2952 | 141 | 7    | N-Oleoyl-L-Serine                                              |
| 170.1278 | 187.121 | -0.0102 | 170.1176 | 189 | 48.2 | 7-Keto-8-Aminopelargonic Acid                                  |
| 170.1278 | 187.121 | -0.0102 | 170.1176 | 183 | 37.9 | 7-Keto-8-Aminopelargonic Acid                                  |
| 170.1278 | 187.121 | -0.0102 | 170.1176 | 129 | 7.4  | 7-Keto-8-Aminopelargonic Acid                                  |
| 170.1278 | 187.121 | -0.0102 | 170.1176 | 232 | 51.4 | 7-Keto-8-Aminopelargonic Acid                                  |
| 170.1278 | 187.121 | -0.0102 | 170.1176 | 225 | 39.4 | 7-Keto-8-Aminopelargonic                                       |

|          |         |         |          |     |      |                                                   |
|----------|---------|---------|----------|-----|------|---------------------------------------------------|
|          |         |         |          |     |      | Acid                                              |
| 170.1278 | 187.121 | -0.0102 | 170.1176 | 162 | 6.6  | 7-Keto-8-Aminopelargonic Acid                     |
| 370.2244 | 370     | -0.01   | 370.21   | 150 | 48.6 | MGDG 7:0; [M+NH4-CO] <sup>+</sup> ; MGDG(2:0/5:0) |
| 370.2244 | 370     | -0.01   | 370.21   | 150 | 48.6 | MGDG 7:0; [M+NH4-CO] <sup>+</sup> ; MGDG(5:0/2:0) |
| 370.2244 | 369.172 | -0.0449 | 370.1795 | 32  | 2.7  | Amisulpride                                       |
| 472.3027 | 471.314 | 0.018   | 472.321  | 106 | 100  | Terfenadine                                       |
| 170.1278 | 187.121 | -0.0102 | 170.1176 | 210 | 51.6 | 7-Keto-8-Aminopelargonic Acid                     |
| 170.1278 | 187.121 | -0.0102 | 170.1176 | 200 | 36.5 | 7-Keto-8-Aminopelargonic Acid                     |
| 170.1278 | 169.085 | -0.0354 | 170.0924 | 166 | 9.3  | L-Histidine, 1-Methyl-                            |
| 474.2957 | 473.275 | -0.0134 | 474.2823 | 25  | 54.2 | Leu-Trp-Arg                                       |
| 474.2957 | 473.275 | -0.0134 | 474.2823 | 21  | 45.8 | Trp-Ile-Arg                                       |
| 370.2514 | 370     | -0.04   | 370.21   | 135 | 36.8 | MGDG 7:0; [M+NH4-CO] <sup>+</sup> ; MGDG(2:0/5:0) |
| 370.2514 | 370     | -0.04   | 370.21   | 135 | 36.8 | MGDG 7:0; [M+NH4-CO] <sup>+</sup> ; MGDG(5:0/2:0) |
| 370.2514 | 369.288 | 0.0438  | 370.2952 | 67  | 5.6  | N-Oleoyl-L-Serine                                 |
| 170.1278 | 187.121 | -0.0102 | 170.1176 | 196 | 43.5 | 7-Keto-8-Aminopelargonic Acid                     |
| 170.1278 | 187.121 | -0.0102 | 170.1176 | 195 | 41.8 | 7-Keto-8-Aminopelargonic Acid                     |
| 170.1278 | 187.121 | -0.0102 | 170.1176 | 146 | 8.6  | 7-Keto-8-Aminopelargonic Acid                     |
| 170.1278 | 187.121 | -0.0102 | 170.1176 | 238 | 48.4 | 7-Keto-8-Aminopelargonic Acid                     |
| 170.1278 | 169.085 | -0.0354 | 170.0924 | 217 | 20.6 | L-Histidine, 3-Methyl-                            |
| 170.1278 | 169.085 | -0.0354 | 170.0924 | 216 | 20.6 | L-Histidine, 3-Methyl-                            |
| 170.1278 | 187.121 | -0.0102 | 170.1176 | 183 | 50.5 | 7-Keto-8-Aminopelargonic Acid                     |
| 170.1278 | 187.121 | -0.0102 | 170.1176 | 171 | 33.7 | 7-Keto-8-Aminopelargonic Acid                     |
| 170.1278 | 169.085 | -0.0354 | 170.0924 | 120 | 6.8  | L-Histidine, 3-Methyl-                            |
| 458.3162 | 435.281 | -0.0463 | 458.2699 | 38  | 100  | N-Acetyl-S-Geranylgeranyl-L-Cysteine              |
| 170.1278 | 187.121 | -0.0102 | 170.1176 | 181 | 60.2 | 7-Keto-8-Aminopelargonic Acid                     |
| 170.1278 | 187.121 | -0.0102 | 170.1176 | 161 | 27.4 | 7-Keto-8-Aminopelargonic Acid                     |
| 170.1278 | 169.085 | -0.0354 | 170.0924 | 112 | 5.6  | L-Histidine, 3-Methyl-                            |
| 170.1278 | 187.121 | -0.0102 | 170.1176 | 301 | 34.6 | 7-Keto-8-Aminopelargonic Acid                     |
| 170.1278 | 187.121 | -0.0102 | 170.1176 | 300 | 33.3 | 7-Keto-8-Aminopelargonic Acid                     |

|          |         |         |          |     |      |                                         |
|----------|---------|---------|----------|-----|------|-----------------------------------------|
| 170.1278 | 169.085 | -0.0354 | 170.0924 | 284 | 19.2 | L-Histidine, 3-Methyl-                  |
| 400.319  | 400.343 | 0.0231  | 400.3421 | 32  | 62.3 | Palmitoyl-L-Carnitine<br>Cation         |
| 400.319  | 401.278 | -0.0485 | 400.2705 | 17  | 37.7 | Myriocin                                |
| 400.319  | 401.278 | -0.0485 | 400.2705 | 17  | 37.7 | Myriocin                                |
| 170.1278 | 187.121 | -0.0102 | 170.1176 | 198 | 38.8 | 7-Keto-8-Aminopelargonic<br>Acid        |
| 170.1278 | 169.085 | -0.0354 | 170.0924 | 191 | 29.7 | L-Histidine, 1-Methyl-                  |
| 170.1278 | 169.085 | -0.0354 | 170.0924 | 188 | 29.7 | L-Histidine, 1-Methyl-                  |
| 370.2244 | 370     | -0.01   | 370.21   | 95  | 50   | MGDG 7:0; [M+NH4-CO]+;<br>MGDG(2:0/5:0) |
| 370.2244 | 370     | -0.01   | 370.21   | 95  | 50   | MGDG 7:0; [M+NH4-CO]+;<br>MGDG(5:0/2:0) |
| 170.1278 | 169.085 | -0.0354 | 170.0924 | 394 | 46.7 | L-Histidine, 1-Methyl-                  |
| 170.1278 | 169.085 | -0.0354 | 170.0924 | 388 | 46.7 | L-Histidine, 1-Methyl-                  |
| 170.1278 | 169.085 | -0.0354 | 170.0924 | 388 | 46.7 | L-Histidine, 1-Methyl-                  |
| 170.1278 | 187.121 | -0.0102 | 170.1176 | 385 | 74.8 | 7-Keto-8-Aminopelargonic<br>Acid        |
| 170.1278 | 187.121 | -0.0102 | 170.1176 | 338 | 15.6 | 7-Keto-8-Aminopelargonic<br>Acid        |
| 170.1278 | 169.085 | -0.0354 | 170.0924 | 295 | 3.5  | L-Histidine, 1-Methyl-                  |
| 400.319  | 400.343 | 0.0231  | 400.3421 | 119 | 24   | Palmitoyl-L-Carnitine<br>Cation         |
| 400.319  | 400.343 | 0.0231  | 400.3421 | 117 | 22.1 | Palmitoyl-L-Carnitine<br>Cation         |
| 400.319  | 400.343 | 0.0231  | 400.3421 | 107 | 15.6 | Palmitoyl-L-Carnitine<br>Cation         |
| 102.1273 | 102.092 | -0.036  | 102.0913 | 214 | 11.4 | Betaine Aldehyde Cation                 |
| 102.1273 | 102.092 | -0.036  | 102.0913 | 213 | 10.9 | Betaine Aldehyde Cation                 |
| 102.1273 | 102.092 | -0.036  | 102.0913 | 213 | 10.9 | Betaine Aldehyde Cation                 |
| 276.1948 | 319.133 | -0.0441 | 276.1507 | 107 | 77.8 | Norfloxacin                             |
| 276.1948 | 319.133 | -0.0441 | 276.1507 | 98  | 77.8 | Norfloxacin                             |
| 276.1948 | 319.133 | -0.0441 | 276.1507 | 86  | 77.8 | Norfloxacin                             |
| 170.1278 | 187.121 | -0.0102 | 170.1176 | 372 | 58.3 | 7-Keto-8-Aminopelargonic<br>Acid        |
| 170.1278 | 169.085 | -0.0354 | 170.0924 | 348 | 19.5 | L-Histidine, 1-Methyl-                  |
| 170.1278 | 169.085 | -0.0354 | 170.0924 | 347 | 19.5 | L-Histidine, 1-Methyl-                  |
| 472.2733 | 471.223 | -0.043  | 472.2303 | 131 | 100  | Pyroglu-Trp-Arg                         |
| 474.2957 | 473.275 | -0.0134 | 474.2823 | 59  | 100  | Leu-Trp-Arg                             |
| 170.1278 | 187.121 | -0.0102 | 170.1176 | 358 | 55.9 | 7-Keto-8-Aminopelargonic<br>Acid        |
| 170.1278 | 187.121 | -0.0102 | 170.1176 | 341 | 30.5 | 7-Keto-8-Aminopelargonic<br>Acid        |
| 170.1278 | 169.085 | -0.0354 | 170.0924 | 314 | 9    | L-Histidine, 1-Methyl-                  |
| 400.319  | 400.343 | 0.0231  | 400.3421 | 83  | 40.7 | Palmitoyl-L-Carnitine<br>Cation         |



|          |         |         |          |     |      |                                            |
|----------|---------|---------|----------|-----|------|--------------------------------------------|
| 400.319  | 400.343 | 0.0231  | 400.3421 | 78  | 32.8 | Palmitoyl-L-Carnitine Cation               |
| 400.319  | 400.343 | 0.0231  | 400.3421 | 73  | 26.4 | Palmitoyl-L-Carnitine Cation               |
| 170.1278 | 187.121 | -0.0102 | 170.1176 | 353 | 72.6 | 7-Keto-8-Aminopelargonic Acid              |
| 170.1278 | 187.121 | -0.0102 | 170.1176 | 322 | 19.8 | 7-Keto-8-Aminopelargonic Acid              |
| 170.1278 | 187.121 | -0.0102 | 170.1176 | 256 | 3.1  | 7-Keto-8-Aminopelargonic Acid              |
| 518.3145 | 495.332 | 0.0072  | 518.3217 | 62  | 100  | 1-Hexadecanoyl-Sn-Glycero-3-Phosphocholine |
| 474.2957 | 473.275 | -0.0134 | 474.2823 | 99  | 68.4 | Leu-Trp-Arg                                |
| 474.2957 | 473.275 | -0.0134 | 474.2823 | 72  | 20.1 | Ile-Trp-Arg                                |
| 474.2957 | 473.275 | -0.0134 | 474.2823 | 48  | 6.7  | Leu-Trp-Arg                                |
| 170.1278 | 187.121 | -0.0102 | 170.1176 | 437 | 77.3 | 7-Keto-8-Aminopelargonic Acid              |
| 170.1278 | 187.121 | -0.0102 | 170.1176 | 387 | 15.7 | 7-Keto-8-Aminopelargonic Acid              |
| 170.1278 | 169.085 | -0.0354 | 170.0924 | 317 | 2.3  | L-Histidine, 1-Methyl-                     |
| 474.2957 | 473.275 | -0.0134 | 474.2823 | 67  | 66.1 | Leu-Trp-Arg                                |
| 474.2957 | 473.275 | -0.0134 | 474.2823 | 38  | 18.7 | Ile-Trp-Arg                                |
| 474.2957 | 473.275 | -0.0134 | 474.2823 | 33  | 15.1 | Ile-Trp-Arg                                |
| 474.2738 | 473.275 | 0.0085  | 474.2823 | 51  | 100  | Leu-Trp-Arg                                |
| 472.2733 | 471.314 | 0.048   | 472.321  | 190 | 100  | Terfenadine                                |
| 472.2733 | 471.314 | 0.048   | 472.321  | 162 | 100  | Terfenadine                                |
| 474.2957 | 473.275 | -0.0134 | 474.2823 | 93  | 44.3 | Ile-Trp-Arg                                |
| 474.2957 | 473.275 | -0.0134 | 474.2823 | 89  | 37.5 | Leu-Trp-Arg                                |
| 474.2957 | 473.275 | -0.0134 | 474.2823 | 70  | 18.2 | Ile-Trp-Arg                                |
| 170.1278 | 187.121 | -0.0102 | 170.1176 | 449 | 76.2 | 7-Keto-8-Aminopelargonic Acid              |
| 170.1278 | 187.121 | -0.0102 | 170.1176 | 415 | 19.5 | 7-Keto-8-Aminopelargonic Acid              |
| 170.1278 | 187.121 | -0.0102 | 170.1176 | 328 | 1.7  | 7-Keto-8-Aminopelargonic Acid              |

**Table A7.** List of non-volatile metabolites (LC/MS) for managed population animals. Sample was pooled from multiple animals (sample collected in Dec 2011). Experiment was conducted using specialized lipids fraction protocol on RP column (refer to Materials and Methods section) in positive ion mode. Top four matches are given for each compound.

| Parent m/z | Mass    | Delta (m/z) | Library Precursor m/z | Match Score | Probability (%) | Chem ID |
|------------|---------|-------------|-----------------------|-------------|-----------------|---------|
| 118.0873   | 117.079 | -0.001      | 118.0863              | 220         | 67.5            | Betaine |
| 118.0873   | 117.079 | -0.001      | 118.0863              | 452         | 58.8            | Betaine |

|          |         |         |          |     |      |                                   |
|----------|---------|---------|----------|-----|------|-----------------------------------|
| 118.0873 | 117.079 | -0.001  | 118.0863 | 340 | 82.5 | Betaine                           |
| 118.0873 | 117.079 | -0.001  | 118.0863 | 352 | 65.8 | Betaine                           |
| 224.1293 | 223.106 | -0.0164 | 224.1129 | 65  | 56.6 | N-Acetyl-D-Galactosaminitol       |
| 224.1293 | 223.084 | -0.0376 | 224.0917 | 159 | 47   | N-Acetyl-L-Tyrosine               |
| 224.1293 | 223.084 | -0.0376 | 224.0917 | 202 | 89.1 | N-Acetyl-L-Tyrosine               |
| 224.1293 | 223.084 | -0.0376 | 224.0917 | 218 | 79.4 | N-Acetyl-L-Tyrosine               |
| 118.0873 | 117.079 | -0.001  | 118.0863 | 382 | 100  | Betaine                           |
| 118.0873 | 117.079 | -0.001  | 118.0863 | 460 | 45.1 | Betaine                           |
| 118.0873 | 117.079 | -0.001  | 118.0863 | 322 | 81.8 | Betaine                           |
| 118.0873 | 117.079 | -0.001  | 118.0863 | 207 | 66.5 | Betaine                           |
| 186.0588 | 370.196 | 0.0467  | 186.1055 | 52  | 100  | Ser-His-Lys                       |
| 224.1293 | 223.084 | -0.0376 | 224.0917 | 307 | 90.4 | N-Acetyl-L-Tyrosine               |
| 224.1293 | 223.084 | -0.0376 | 224.0917 | 205 | 76.2 | N-Acetyl-L-Tyrosine               |
| 118.0873 | 117.079 | -0.001  | 118.0863 | 318 | 32.2 | Betaine                           |
| 118.0873 | 117.079 | -0.001  | 118.0863 | 472 | 64.4 | Betaine                           |
| 118.0873 | 117.079 | -0.001  | 118.0863 | 275 | 67.5 | Betaine                           |
| 118.0873 | 117.079 | -0.001  | 118.0863 | 368 | 68.7 | Betaine                           |
| 186.0588 | 163.084 | 0.0149  | 186.0737 | 117 | 80.1 | N,N-Bis(2-Hydroxyethyl)Glycine    |
| 224.1293 | 223.106 | -0.0164 | 224.1129 | 42  | 58.6 | N-Acetyl-D-Galactosaminitol       |
| 224.1293 | 446.228 | -0.0081 | 224.1212 | 120 | 49.7 | Tyr-His-Lys                       |
| 224.1293 | 223.084 | -0.0376 | 224.0917 | 249 | 55.6 | N-Acetyl-L-Tyrosine               |
| 224.1293 | 223.084 | -0.0376 | 224.0917 | 205 | 77.6 | N-Acetyl-L-Tyrosine               |
| 224.1293 | 223.106 | -0.0164 | 224.1129 | 93  | 100  | N-Acetyl-D-Galactosaminitol       |
| 224.1293 | 223.106 | -0.0164 | 224.1129 | 86  | 100  | N-Acetyl-D-Galactosaminitol       |
| 243.1858 | 220.183 | -0.0139 | 243.1719 | 64  | 100  | Butylated Hydroxytoluene          |
| 118.0959 | 117.079 | -0.0096 | 118.0863 | 295 | 100  | Betaine                           |
| 118.0959 | 117.079 | -0.0096 | 118.0863 | 268 | 96.4 | Betaine                           |
| 118.0959 | 117.079 | -0.0096 | 118.0863 | 332 | 31.6 | Betaine                           |
| 139.0603 | 138.032 | -0.021  | 139.039  | 120 | 37.2 | Salicylic Acid                    |
| 139.0603 | 138.043 | -0.0101 | 139.0502 | 163 | 28.4 | 4-Imidazoleacrylic Acid           |
| 139.0603 | 138.043 | -0.0101 | 139.0502 | 163 | 72.5 | 4-Imidazoleacrylic Acid           |
| 273.1777 | 290.225 | 0.0436  | 273.2213 | 67  | 73.2 | 5-Androsten-3.Beta.,17.Beta.-Diol |
| 273.1777 | 290.225 | 0.0436  | 273.2213 | 102 | 42   | 5-Androsten-3.Beta.,17.Beta.-Diol |
| 195.1333 | 194.115 | -0.0106 | 195.1227 | 209 | 100  | Tetraethylene Glycol              |
| 432.2891 | 449.314 | 0.0217  | 432.3108 | 66  | 100  | Glycodeoxycholic Acid             |
| 387.1819 | 386     | -0.05   | 387.13   | 258 | 28.5 | 1-O-B-D-Glucopyranosyl Sinapate   |
| 387.1819 | 193.074 | -0.0268 | 387.1551 | 252 | 31.3 | Hippuric Acid, Methyl Ester       |
| 387.1819 | 193.074 | -0.0268 | 387.1551 | 301 | 54.5 | Hippuric Acid, Methyl Ester       |

|          |         |         |          |     |      |                                        |
|----------|---------|---------|----------|-----|------|----------------------------------------|
| 387.1819 | 193.074 | -0.0268 | 387.1551 | 237 | 28.3 | Hippuric Acid, Methyl Ester            |
| 404.2081 | 403.207 | 0.006   | 404.214  | 79  | 12.7 | Gln-Glu-Lys                            |
| 404.2081 | 403.222 | 0.0211  | 404.2292 | 16  | 11.4 | Trp-Ala-Lys                            |
| 404.2081 | 403.207 | 0.006   | 404.214  | 49  | 42.5 | Gln-Glu-Lys                            |
| 404.2081 | 403.207 | 0.006   | 404.214  | 64  | 17.2 | Gln-Glu-Lys                            |
| 409.1633 | 386.17  | -0.0038 | 409.1595 | 113 | 81.2 | N6-2-(4-Aminophenyl)Ethyladenosine     |
| 343.291  | 408.288 | -0.0267 | 343.2643 | 88  | 100  | Cholic Acid                            |
| 387.176  | 193.074 | -0.0209 | 387.1551 | 237 | 100  | Hippuric Acid, Methyl Ester            |
| 387.176  | 193.074 | -0.0209 | 387.1551 | 264 | 69   | Hippuric Acid, Methyl Ester            |
| 387.176  | 193.074 | -0.0209 | 387.1551 | 266 | 100  | Hippuric Acid, Methyl Ester            |
| 387.176  | 193.074 | -0.0209 | 387.1551 | 308 | 49.2 | Hippuric Acid, Methyl Ester            |
| 118.0821 | 117.079 | 0.0042  | 118.0863 | 392 | 68.2 | Betaine                                |
| 118.0821 | 117.079 | 0.0042  | 118.0863 | 547 | 97.5 | Betaine                                |
| 118.0821 | 117.079 | 0.0042  | 118.0863 | 345 | 76.5 | Betaine                                |
| 118.0821 | 117.079 | 0.0042  | 118.0863 | 376 | 35.4 | Betaine                                |
| 118.0873 | 117.079 | -0.001  | 118.0863 | 344 | 100  | Betaine                                |
| 118.0873 | 117.079 | -0.001  | 118.0863 | 365 | 31.3 | Betaine                                |
| 118.0873 | 117.079 | -0.001  | 118.0863 | 294 | 66.7 | Betaine                                |
| 118.0873 | 117     | 0       | 118.09   | 317 | 27.8 | Betaine                                |
| 118.0873 | 117.079 | -0.001  | 118.0863 | 424 | 62.4 | Betaine                                |
| 118.0873 | 117.079 | -0.001  | 118.0863 | 295 | 68.2 | Betaine                                |
| 118.0873 | 117.079 | -0.001  | 118.0863 | 321 | 70.2 | Betaine                                |
| 288.2597 | 270.219 | -0.0064 | 288.2533 | 61  | 100  | Surfynol PSA-336                       |
| 288.2547 | 287.196 | -0.052  | 288.203  | 89  | 20.4 | Leu-Arg                                |
| 288.2547 | 287.196 | -0.052  | 288.203  | 271 | 67.2 | Leu-Arg                                |
| 288.2547 | 287.196 | -0.052  | 288.203  | 116 | 32.9 | Leu-Arg                                |
| 118.0873 | 117.079 | -0.001  | 118.0863 | 449 | 66.5 | Betaine                                |
| 118.0873 | 117.079 | -0.001  | 118.0863 | 309 | 68.9 | Betaine                                |
| 118.0873 | 117.079 | -0.001  | 118.0863 | 299 | 73.6 | Betaine                                |
| 244.2278 | 226.193 | -0.0007 | 244.2271 | 146 | 100  | 2,4,7,9-Tetramethyl-5-Decyne-4,7-Diol  |
| 244.2278 | 226.193 | -0.0007 | 244.2271 | 135 | 100  | 2,4,7,9-Tetramethyl-5-Decyne-4,7-Diol  |
| 304.3018 | 304.3   | -0.0019 | 304.2999 | 183 | 12.9 | Benzyl Dodecyl Dimethylammonium Cation |
| 304.3018 | 304.3   | -0.0019 | 304.2999 | 301 | 46   | Benzyl Dodecyl Dimethylammonium Cation |
| 304.3018 | 304.3   | -0.0019 | 304.2999 | 170 | 15.6 | Benzyl Dodecyl Dimethylammonium Cation |
| 304.3018 | 304.3   | -0.0019 | 304.2999 | 182 | 10.4 | Benzyl Dodecyl Dimethylammonium Cation |
| 118.0873 | 117.079 | -0.001  | 118.0863 | 378 | 34.6 | Betaine                                |
| 118.0873 | 117.079 | -0.001  | 118.0863 | 333 | 81.7 | Betaine                                |

|          |         |         |          |     |      |                                                    |
|----------|---------|---------|----------|-----|------|----------------------------------------------------|
| 118.0873 | 117.079 | -0.001  | 118.0863 | 376 | 62.6 | Betaine                                            |
| 186.0588 | 370.196 | 0.0467  | 186.1055 | 65  | 100  | Ser-His-Lys                                        |
| 186.0588 | 370.196 | 0.0467  | 186.1055 | 62  | 100  | Ser-His-Lys                                        |
| 118.0873 | 117.079 | -0.001  | 118.0863 | 302 | 68.4 | Betaine                                            |
| 118.0873 | 117.079 | -0.001  | 118.0863 | 391 | 39.1 | Betaine                                            |
| 118.0873 | 117.079 | -0.001  | 118.0863 | 320 | 100  | Betaine                                            |
| 118.0873 | 117.079 | -0.001  | 118.0863 | 346 | 60.5 | Betaine                                            |
| 267.1739 | 266.165 | -0.002  | 267.172  | 266 | 100  | Tributyl Phosphate                                 |
| 118.0873 | 117.079 | -0.001  | 118.0863 | 331 | 98.4 | Betaine                                            |
| 118.0873 | 117.079 | -0.001  | 118.0863 | 437 | 72   | Betaine                                            |
| 118.0873 | 117.079 | -0.001  | 118.0863 | 317 | 74.1 | Betaine                                            |
| 118.0873 | 117.079 | -0.001  | 118.0863 | 312 | 55.2 | Betaine                                            |
| 118.0873 | 117.079 | -0.001  | 118.0863 | 409 | 52.8 | Betaine                                            |
| 118.0873 | 117.079 | -0.001  | 118.0863 | 350 | 59.1 | Betaine                                            |
| 118.0873 | 117.079 | -0.001  | 118.0863 | 347 | 58.6 | Betaine                                            |
| 279.1625 | 278.152 | -0.0035 | 279.1591 | 251 | 81.2 | Dibutyl Phthalate                                  |
| 279.1625 | 278.152 | -0.0035 | 279.1591 | 250 | 96.5 | Dibutyl Phthalate                                  |
| 279.1625 | 278.152 | -0.0035 | 279.1591 | 308 | 96   | Dibutyl Phthalate                                  |
| 279.1625 | 278.152 | -0.0035 | 279.1591 | 284 | 97   | Dibutyl Phthalate                                  |
| 399.2537 | 398.243 | -0.0031 | 399.2506 | 165 | 100  | Tris(Butoxyethyl) Phosphate                        |
| 399.2537 | 398.243 | -0.0031 | 399.2506 | 113 | 100  | Tris(Butoxyethyl) Phosphate                        |
| 444.3346 | 443.297 | -0.0305 | 444.3041 | 62  | 27.4 | Arg-Ile-Arg                                        |
| 532.3865 | 514.318 | -0.0351 | 532.3514 | 207 | 100  | 3,6,9,12,15-Pentaoxonacosan-1-Ol, Hydrogen Sulfate |
| 532.3865 | 514.318 | -0.0351 | 532.3514 | 129 | 100  | 3,6,9,12,15-Pentaoxonacosan-1-Ol, Hydrogen Sulfate |
| 400.3098 | 399.259 | -0.0431 | 400.2667 | 17  | 18.5 | Arg-Pro-Lys                                        |
| 186.0588 | 163.084 | 0.0149  | 186.0737 | 128 | 100  | N,N-Bis(2-Hydroxyethyl)Glycine                     |
| 118.0873 | 117.079 | -0.001  | 118.0863 | 448 | 48.6 | Betaine                                            |
| 118.0873 | 117.079 | -0.001  | 118.0863 | 319 | 74   | Betaine                                            |
| 118.0873 | 117.079 | -0.001  | 118.0863 | 343 | 65.7 | Betaine                                            |
| 97.0774  | 114.104 | 0.0238  | 97.1012  | 23  | 62.3 | Cyclohexanemethanol                                |
| 332.332  | 332.332 | -0.0009 | 332.3312 | 225 | 11.3 | Benzyl Tetradecyl<br>Dimethylammonium Cation       |
| 332.332  | 332.332 | -0.0009 | 332.3312 | 237 | 26.7 | Benzyl Tetradecyl<br>Dimethylammonium Cation       |
| 332.332  | 332.332 | -0.0009 | 332.3312 | 170 | 12.8 | Benzyl Tetradecyl<br>Dimethylammonium Cation       |
| 332.332  | 332.332 | -0.0009 | 332.3312 | 213 | 18.3 | Benzyl Tetradecyl<br>Dimethylammonium Cation       |
| 118.0873 | 117.079 | -0.001  | 118.0863 | 385 | 71.1 | Betaine                                            |
| 118.0873 | 117.079 | -0.001  | 118.0863 | 295 | 64.3 | Betaine                                            |
| 118.0873 | 117.079 | -0.001  | 118.0863 | 324 | 30.8 | Betaine                                            |

|          |         |         |          |     |      |                                              |
|----------|---------|---------|----------|-----|------|----------------------------------------------|
| 118.0873 | 117.079 | -0.001  | 118.0863 | 383 | 52.7 | Betaine                                      |
| 118.0873 | 117.079 | -0.001  | 118.0863 | 370 | 89.7 | Betaine                                      |
| 118.0873 | 117.079 | -0.001  | 118.0863 | 316 | 76.1 | Betaine                                      |
| 332.332  | 332.332 | -0.0009 | 332.3312 | 97  | 42   | Benzyl Tetradecyl<br>Dimethylammonium Cation |
| 332.332  | 332.332 | -0.0009 | 332.3312 | 150 | 21.2 | Benzyl Tetradecyl<br>Dimethylammonium Cation |
| 186.0588 | 370.196 | 0.0467  | 186.1055 | 65  | 100  | Ser-His-Lys                                  |
| 284.3311 | 284.332 | 0       | 284.3312 | 25  | 100  | Hexadecyltrimethylammonium<br>Cation         |
| 284.3311 | 284.332 | 0       | 284.3312 | 202 | 84.5 | Hexadecyltrimethylammonium<br>Cation         |
| 284.3311 | 284.332 | 0       | 284.3312 | 160 | 73.4 | Hexadecyltrimethylammonium<br>Cation         |
| 284.3311 | 284.332 | 0       | 284.3312 | 163 | 78.8 | Hexadecyltrimethylammonium<br>Cation         |
| 118.0873 | 117.079 | -0.001  | 118.0863 | 234 | 100  | Betaine                                      |
| 118.0873 | 117.079 | -0.001  | 118.0863 | 430 | 60.3 | Betaine                                      |
| 118.0873 | 117.079 | -0.001  | 118.0863 | 337 | 80.8 | Betaine                                      |
| 118.0873 | 117.079 | -0.001  | 118.0863 | 392 | 63.6 | Betaine                                      |
| 546.3998 | 523.364 | -0.047  | 546.353  | 115 | 100  | PAF C-16                                     |
| 546.3998 | 523.364 | -0.047  | 546.353  | 95  | 100  | PAF C-16                                     |
| 118.0873 | 117.079 | -0.001  | 118.0863 | 358 | 48   | Betaine                                      |
| 118.0873 | 117.079 | -0.001  | 118.0863 | 419 | 100  | Betaine                                      |
| 118.0873 | 117.079 | -0.001  | 118.0863 | 386 | 98.4 | Betaine                                      |
| 118.0873 | 117.079 | -0.001  | 118.0863 | 310 | 66.3 | Betaine                                      |
| 284.3311 | 284.332 | 0       | 284.3312 | 160 | 77.5 | Hexadecyltrimethylammonium<br>Cation         |
| 186.0588 | 370.196 | 0.0467  | 186.1055 | 76  | 100  | Ser-His-Lys                                  |
| 118.0873 | 117.079 | -0.001  | 118.0863 | 413 | 63.5 | Betaine                                      |
| 118.0873 | 117.079 | -0.001  | 118.0863 | 360 | 91.2 | Betaine                                      |
| 118.0873 | 117.079 | -0.001  | 118.0863 | 336 | 74.1 | Betaine                                      |
| 140.0692 | 139.1   | 0.038   | 140.107  | 98  | 100  | Tropinone                                    |
| 118.0873 | 117.079 | -0.001  | 118.0863 | 421 | 62.4 | Betaine                                      |
| 118.0873 | 117.079 | -0.001  | 118.0863 | 320 | 63.9 | Betaine                                      |
| 118.0873 | 117.079 | -0.001  | 118.0863 | 282 | 64.4 | Betaine                                      |
| 118.0873 | 117.079 | -0.001  | 118.0863 | 286 | 41.8 | Betaine                                      |
| 118.0873 | 117     | 0       | 118.09   | 431 | 31.7 | Betaine                                      |
| 118.0873 | 117.079 | -0.001  | 118.0863 | 287 | 70.3 | Betaine                                      |
| 118.0873 | 117.079 | -0.001  | 118.0863 | 383 | 75.4 | Betaine                                      |
| 428.3751 | 427     | 0.03    | 428.41   | 233 | 51.5 | N-Octanoylsphinganine,D-Erythro              |
| 186.0588 | 163.084 | 0.0149  | 186.0737 | 151 | 89.1 | N,N-Bis(2-Hydroxyethyl)Glycine               |
| 118.0873 | 117.079 | -0.001  | 118.0863 | 333 | 100  | Betaine                                      |
| 118.0873 | 117.079 | -0.001  | 118.0863 | 370 | 66.4 | Betaine                                      |

|          |         |         |          |     |      |                                             |
|----------|---------|---------|----------|-----|------|---------------------------------------------|
| 118.0873 | 117.079 | -0.001  | 118.0863 | 314 | 74.1 | Betaine                                     |
| 118.0873 | 117.079 | -0.001  | 118.0863 | 256 | 65.4 | Betaine                                     |
| 186.0588 | 370.196 | 0.0467  | 186.1055 | 70  | 100  | Ser-His-Lys                                 |
| 224.1293 | 446.228 | -0.0081 | 224.1212 | 124 | 55.4 | Tyr-His-Lys                                 |
| 224.1293 | 223.084 | -0.0376 | 224.0917 | 328 | 93.2 | N-Acetyl-L-Tyrosine                         |
| 224.1293 | 223.084 | -0.0376 | 224.0917 | 303 | 92.7 | N-Acetyl-L-Tyrosine                         |
| 195.1236 | 194.115 | -0.0009 | 195.1227 | 248 | 100  | Tetraethylene Glycol                        |
| 118.0873 | 117.079 | -0.001  | 118.0863 | 325 | 100  | Betaine                                     |
| 118.0873 | 117.079 | -0.001  | 118.0863 | 488 | 66.2 | Betaine                                     |
| 118.0873 | 117.079 | -0.001  | 118.0863 | 382 | 97.3 | Betaine                                     |
| 118.0873 | 117.079 | -0.001  | 118.0863 | 389 | 62.7 | Betaine                                     |
| 360.3626 | 360.363 | -0.0002 | 360.3625 | 283 | 40.4 | Benzyl Hexadecyl<br>Dimethylammonium Cation |
| 360.3626 | 360.363 | -0.0002 | 360.3625 | 299 | 41.1 | Benzyl Hexadecyl<br>Dimethylammonium Cation |
| 360.3626 | 360.363 | -0.0002 | 360.3625 | 350 | 87.6 | Benzyl Hexadecyl<br>Dimethylammonium Cation |
| 360.3626 | 360.363 | -0.0002 | 360.3625 | 309 | 72.3 | Benzyl Hexadecyl<br>Dimethylammonium Cation |
| 97.0774  | 114.104 | 0.0238  | 97.1012  | 24  | 23.1 | Cyclohexanol, 1-Methyl-                     |
| 118.0873 | 117.079 | -0.001  | 118.0863 | 256 | 55.8 | Betaine                                     |
| 118.0873 | 117.079 | -0.001  | 118.0863 | 381 | 45   | Betaine                                     |
| 118.0873 | 117.079 | -0.001  | 118.0863 | 304 | 76.5 | Betaine                                     |
| 118.0873 | 117.079 | -0.001  | 118.0863 | 276 | 61.5 | Betaine                                     |
| 360.3626 | 360.363 | -0.0002 | 360.3625 | 285 | 56.7 | Benzyl Hexadecyl<br>Dimethylammonium Cation |
| 118.0873 | 117.079 | -0.001  | 118.0863 | 424 | 59.2 | Betaine                                     |
| 118.0873 | 117.079 | -0.001  | 118.0863 | 261 | 65.9 | Betaine                                     |
| 118.0873 | 117.079 | -0.001  | 118.0863 | 398 | 41.3 | Betaine                                     |
| 369.3861 | 386.355 | -0.0345 | 369.3516 | 260 | 55.4 | Cholesterol                                 |
| 97.0774  | 114.104 | 0.0238  | 97.1012  | 71  | 100  | Cyclopentanemethanol, .Alpha.-<br>Methyl-   |
| 186.0588 | 370.196 | 0.0467  | 186.1055 | 50  | 100  | Ser-His-Lys                                 |
| 385.3803 | 384.339 | -0.0338 | 385.3465 | 21  | 53.1 | Cholesta-5,7-Dien-3-Ol, (3.Beta.)-          |
| 385.3803 | 384.339 | -0.0338 | 385.3465 | 102 | 100  | Cholecalciferol                             |
| 385.3803 | 402.35  | -0.0338 | 385.3465 | 3   | 100  | 25-Hydroxycholesterol                       |
| 195.1236 | 194.115 | -0.0009 | 195.1227 | 272 | 100  | Tetraethylene Glycol                        |
| 118.0873 | 117.079 | -0.001  | 118.0863 | 225 | 100  | Betaine                                     |
| 118.0873 | 117.079 | -0.001  | 118.0863 | 424 | 44.4 | Betaine                                     |
| 118.0873 | 117.079 | -0.001  | 118.0863 | 299 | 68.2 | Betaine                                     |
| 118.0873 | 117.079 | -0.001  | 118.0863 | 340 | 60.9 | Betaine                                     |
| 224.1293 | 223.084 | -0.0376 | 224.0917 | 222 | 76.2 | N-Acetyl-L-Tyrosine                         |
| 224.1293 | 223.084 | -0.0376 | 224.0917 | 265 | 83.2 | N-Acetyl-L-Tyrosine                         |

|          |         |         |          |     |      |                                               |
|----------|---------|---------|----------|-----|------|-----------------------------------------------|
| 224.1293 | 223.084 | -0.0376 | 224.0917 | 251 | 89.1 | N-Acetyl-L-Tyrosine                           |
| 118.0873 | 117.079 | -0.001  | 118.0863 | 353 | 32.5 | Betaine                                       |
| 118.0873 | 117.079 | -0.001  | 118.0863 | 474 | 67.4 | Betaine                                       |
| 118.0873 | 117.079 | -0.001  | 118.0863 | 276 | 81   | Betaine                                       |
| 118.0873 | 117.079 | -0.001  | 118.0863 | 409 | 61.5 | Betaine                                       |
| 97.0774  | 114.104 | 0.0238  | 97.1012  | 34  | 22.5 | Cyclohexanol, 1-Methyl-                       |
| 186.0588 | 163.084 | 0.0149  | 186.0737 | 160 | 100  | N,N-Bis(2-Hydroxyethyl)Glycine                |
| 224.1293 | 223.076 | -0.0456 | 224.0837 | 47  | 100  | Desmethyketamine                              |
| 224.1293 | 223.084 | -0.0376 | 224.0917 | 218 | 100  | N-Acetyl-L-Tyrosine                           |
| 224.1293 | 223.084 | -0.0376 | 224.0917 | 260 | 86.1 | N-Acetyl-L-Tyrosine                           |
| 400.3796 | 400.343 | -0.0375 | 400.3421 | 191 | 27.7 | Palmitoyl-L-Carnitine Cation                  |
| 118.0873 | 117     | 0       | 118.09   | 319 | 25.8 | Betaine                                       |
| 118.0873 | 117.079 | -0.001  | 118.0863 | 417 | 43.4 | Betaine                                       |
| 118.0873 | 117.079 | -0.001  | 118.0863 | 346 | 84.3 | Betaine                                       |
| 118.0873 | 117.079 | -0.001  | 118.0863 | 269 | 72.2 | Betaine                                       |
| 282.2797 | 281.272 | -0.0006 | 282.2791 | 77  | 100  | 9-Octadecenamide, (Z)-                        |
| 282.2797 | 281.272 | -0.0006 | 282.2791 | 104 | 100  | 9-Octadecenamide, (Z)-                        |
| 282.2797 | 281.272 | -0.0006 | 282.2791 | 215 | 93.2 | 9-Octadecenamide, (Z)-                        |
| 140.0692 | 139.027 | -0.035  | 140.0342 | 100 | 100  | 3-Pyridinecarboxylic Acid, 1,6-Dihydro-6-Oxo- |
| 186.0588 | 163.084 | 0.0149  | 186.0737 | 118 | 86.6 | N,N-Bis(2-Hydroxyethyl)Glycine                |
| 186.0588 | 163.084 | 0.0149  | 186.0737 | 141 | 92   | N,N-Bis(2-Hydroxyethyl)Glycine                |
| 186.0588 | 163.084 | 0.0149  | 186.0737 | 135 | 100  | N,N-Bis(2-Hydroxyethyl)Glycine                |
| 186.0588 | 163.084 | 0.0149  | 186.0737 | 147 | 100  | N,N-Bis(2-Hydroxyethyl)Glycine                |
| 118.0873 | 117.079 | -0.001  | 118.0863 | 452 | 36.1 | Betaine                                       |
| 118.0873 | 117     | 0       | 118.09   | 331 | 27.6 | Betaine                                       |
| 118.0873 | 117.079 | -0.001  | 118.0863 | 360 | 61.5 | Betaine                                       |
| 186.0588 | 203.091 | 0.0285  | 186.0873 | 66  | 73.1 | Ala-Asn                                       |
| 186.0588 | 163.084 | 0.0149  | 186.0737 | 141 | 100  | N,N-Bis(2-Hydroxyethyl)Glycine                |
| 393.2988 | 392.293 | 0.0011  | 393.2999 | 89  | 100  | Deoxycholic Acid                              |
| 118.0873 | 117.079 | -0.001  | 118.0863 | 264 | 33.9 | Betaine                                       |
| 118.0873 | 117.079 | -0.001  | 118.0863 | 427 | 65.1 | Betaine                                       |
| 118.0873 | 117.079 | -0.001  | 118.0863 | 295 | 49.6 | Betaine                                       |
| 118.0873 | 117.079 | -0.001  | 118.0863 | 413 | 59.4 | Betaine                                       |
| 97.0774  | 114.104 | 0.0238  | 97.1012  | 26  | 45.3 | Cyclohexanol, 2-Methyl-, Trans-               |
| 186.0588 | 370.196 | 0.0467  | 186.1055 | 60  | 100  | Ser-His-Lys                                   |
| 186.0588 | 163.084 | 0.0149  | 186.0737 | 180 | 100  | N,N-Bis(2-Hydroxyethyl)Glycine                |
| 371.3164 | 370.308 | -0.0009 | 371.3156 | 177 | 100  | Hexanedioic Acid, Bis(2-Ethylhexyl) Ester     |
| 371.3164 | 370.308 | -0.0009 | 371.3156 | 131 | 100  | Hexanedioic Acid, Bis(2-Ethylhexyl) Ester     |
| 371.3164 | 370.308 | -0.0009 | 371.3156 | 49  | 100  | Hexanedioic Acid, Bis(2-Ethylhexyl) Ester     |

|          |         |         |          |     |      |                                           |
|----------|---------|---------|----------|-----|------|-------------------------------------------|
| 371.3164 | 370.308 | -0.0009 | 371.3156 | 170 | 100  | Hexanedioic Acid, Bis(2-Ethylhexyl) Ester |
| 118.0873 | 117.079 | -0.001  | 118.0863 | 329 | 60.7 | Betaine                                   |
| 118.0873 | 117.079 | -0.001  | 118.0863 | 419 | 47   | Betaine                                   |
| 118.0873 | 117.079 | -0.001  | 118.0863 | 339 | 98.2 | Betaine                                   |
| 118.0873 | 117.079 | -0.001  | 118.0863 | 341 | 59.5 | Betaine                                   |
| 186.0588 | 163.084 | 0.0149  | 186.0737 | 192 | 92.6 | N,N-Bis(2-Hydroxyethyl)Glycine            |
| 186.0588 | 163.084 | 0.0149  | 186.0737 | 146 | 93   | N,N-Bis(2-Hydroxyethyl)Glycine            |
| 371.3164 | 370.308 | -0.0009 | 371.3156 | 182 | 100  | Hexanedioic Acid, Bis(2-Ethylhexyl) Ester |
| 371.3164 | 370.308 | -0.0009 | 371.3156 | 165 | 100  | Hexanedioic Acid, Bis(2-Ethylhexyl) Ester |
| 371.3164 | 370.308 | -0.0009 | 371.3156 | 69  | 100  | Hexanedioic Acid, Bis(2-Ethylhexyl) Ester |
| 371.3164 | 370.308 | -0.0009 | 371.3156 | 116 | 100  | Hexanedioic Acid, Bis(2-Ethylhexyl) Ester |
| 118.0873 | 117.079 | -0.001  | 118.0863 | 289 | 85.4 | Betaine                                   |
| 118.0873 | 117.079 | -0.001  | 118.0863 | 365 | 31.2 | Betaine                                   |
| 118.0873 | 117.079 | -0.001  | 118.0863 | 363 | 75.6 | Betaine                                   |
| 118.0873 | 117.079 | -0.001  | 118.0863 | 330 | 83   | Betaine                                   |
| 118.0873 | 117.079 | -0.001  | 118.0863 | 333 | 69.8 | Betaine                                   |
| 118.0873 | 117.079 | -0.001  | 118.0863 | 355 | 60.2 | Betaine                                   |
| 118.0873 | 117.079 | -0.001  | 118.0863 | 307 | 76.1 | Betaine                                   |
| 118.0873 | 117.079 | -0.001  | 118.0863 | 363 | 55.9 | Betaine                                   |
| 97.0774  | 114.104 | 0.0238  | 97.1012  | 51  | 20   | Cyclohexanol, 1-Methyl-                   |
| 371.3164 | 370.308 | -0.0009 | 371.3156 | 170 | 100  | Hexanedioic Acid, Bis(2-Ethylhexyl) Ester |
| 371.3164 | 370.308 | -0.0009 | 371.3156 | 150 | 100  | Hexanedioic Acid, Bis(2-Ethylhexyl) Ester |
| 371.3164 | 370.308 | -0.0009 | 371.3156 | 44  | 100  | Hexanedioic Acid, Bis(2-Ethylhexyl) Ester |
| 371.3164 | 370.308 | -0.0009 | 371.3156 | 115 | 100  | Hexanedioic Acid, Bis(2-Ethylhexyl) Ester |
| 186.0588 | 163.084 | 0.0149  | 186.0737 | 98  | 57.3 | N,N-Bis(2-Hydroxyethyl)Glycine            |
| 186.0588 | 203.091 | 0.0285  | 186.0873 | 49  | 68.7 | Ala-Asn                                   |
| 186.0588 | 370.196 | 0.0467  | 186.1055 | 32  | 100  | Ser-His-Lys                               |
| 118.0873 | 117.079 | -0.001  | 118.0863 | 267 | 55.2 | Betaine                                   |
| 118.0873 | 117.079 | -0.001  | 118.0863 | 394 | 63.6 | Betaine                                   |
| 118.0873 | 117.079 | -0.001  | 118.0863 | 275 | 60.1 | Betaine                                   |
| 118.0873 | 117.079 | -0.001  | 118.0863 | 352 | 47   | Betaine                                   |
| 186.0588 | 163.084 | 0.0149  | 186.0737 | 118 | 69.9 | N,N-Bis(2-Hydroxyethyl)Glycine            |
| 186.0588 | 163.084 | 0.0149  | 186.0737 | 146 | 100  | N,N-Bis(2-Hydroxyethyl)Glycine            |
| 106.0872 | 105.079 | -0.0009 | 106.0863 | 121 | 100  | Diethanolamine                            |
| 224.1293 | 223.106 | -0.0164 | 224.1129 | 133 | 100  | N-Acetyl-D-Galactosaminitol               |



|          |         |         |          |     |      |                                           |
|----------|---------|---------|----------|-----|------|-------------------------------------------|
| 224.1293 | 223.084 | -0.0376 | 224.0917 | 189 | 70.6 | N-Acetyl-L-Tyrosine                       |
| 224.1293 | 223.084 | -0.0376 | 224.0917 | 284 | 89.6 | N-Acetyl-L-Tyrosine                       |
| 224.1293 | 223.084 | -0.0376 | 224.0917 | 263 | 86.8 | N-Acetyl-L-Tyrosine                       |
| 118.0873 | 117.079 | -0.001  | 118.0863 | 406 | 71.7 | Betaine                                   |
| 118.0873 | 117.079 | -0.001  | 118.0863 | 289 | 56.5 | Betaine                                   |
| 118.0873 | 117.079 | -0.001  | 118.0863 | 377 | 61.8 | Betaine                                   |
| 393.2988 | 392.293 | 0.0011  | 393.2999 | 78  | 100  | Chenodeoxycholic Acid                     |
| 371.3164 | 370.308 | -0.0009 | 371.3156 | 207 | 100  | Hexanedioic Acid, Bis(2-Ethylhexyl) Ester |
| 371.3164 | 370.308 | -0.0009 | 371.3156 | 174 | 100  | Hexanedioic Acid, Bis(2-Ethylhexyl) Ester |
| 371.3164 | 370.308 | -0.0009 | 371.3156 | 66  | 100  | Hexanedioic Acid, Bis(2-Ethylhexyl) Ester |
| 371.3164 | 370.308 | -0.0009 | 371.3156 | 117 | 100  | Hexanedioic Acid, Bis(2-Ethylhexyl) Ester |
| 118.0873 | 117.079 | -0.001  | 118.0863 | 444 | 60.1 | Betaine                                   |
| 118.0873 | 117.079 | -0.001  | 118.0863 | 308 | 69.2 | Betaine                                   |
| 118.0873 | 117.079 | -0.001  | 118.0863 | 364 | 41.6 | Betaine                                   |
| 371.3164 | 370.308 | -0.0009 | 371.3156 | 215 | 100  | Hexanedioic Acid, Bis(2-Ethylhexyl) Ester |
| 371.3164 | 370.308 | -0.0009 | 371.3156 | 183 | 100  | Hexanedioic Acid, Bis(2-Ethylhexyl) Ester |
| 371.3164 | 370.308 | -0.0009 | 371.3156 | 107 | 100  | Hexanedioic Acid, Bis(2-Ethylhexyl) Ester |
| 371.3164 | 370.308 | -0.0009 | 371.3156 | 174 | 100  | Hexanedioic Acid, Bis(2-Ethylhexyl) Ester |
| 186.0588 | 163.084 | 0.0149  | 186.0737 | 145 | 100  | N,N-Bis(2-Hydroxyethyl)Glycine            |
| 118.0873 | 117.079 | -0.001  | 118.0863 | 256 | 39   | Betaine                                   |
| 118.0873 | 117.079 | -0.001  | 118.0863 | 387 | 31.2 | Betaine                                   |
| 118.0873 | 117.079 | -0.001  | 118.0863 | 251 | 65   | Betaine                                   |
| 118.0873 | 117.079 | -0.001  | 118.0863 | 242 | 66.5 | Betaine                                   |
| 393.2988 | 392.293 | 0.0011  | 393.2999 | 45  | 100  | Chenodeoxycholic Acid                     |
| 393.2988 | 392.293 | 0.0011  | 393.2999 | 37  | 100  | Chenodeoxycholic Acid                     |
| 371.3164 | 370.308 | -0.0009 | 371.3156 | 231 | 100  | Hexanedioic Acid, Bis(2-Ethylhexyl) Ester |
| 371.3164 | 370.308 | -0.0009 | 371.3156 | 173 | 100  | Hexanedioic Acid, Bis(2-Ethylhexyl) Ester |
| 371.3164 | 370.308 | -0.0009 | 371.3156 | 104 | 100  | Hexanedioic Acid, Bis(2-Ethylhexyl) Ester |
| 371.3164 | 370.308 | -0.0009 | 371.3156 | 131 | 100  | Hexanedioic Acid, Bis(2-Ethylhexyl) Ester |
| 186.0588 | 163.084 | 0.0149  | 186.0737 | 145 | 100  | N,N-Bis(2-Hydroxyethyl)Glycine            |
| 106.0872 | 105     | 0       | 106.09   | 166 | 72.9 | Diethanolamine                            |
| 106.0872 | 105     | 0       | 106.09   | 161 | 81.4 | Diethanolamine                            |
| 118.0873 | 117.079 | -0.001  | 118.0863 | 330 | 53.7 | Betaine                                   |

|          |         |         |          |     |      |                                           |
|----------|---------|---------|----------|-----|------|-------------------------------------------|
| 118.0873 | 117.079 | -0.001  | 118.0863 | 431 | 43.4 | Betaine                                   |
| 118.0873 | 117.079 | -0.001  | 118.0863 | 266 | 64.7 | Betaine                                   |
| 118.0873 | 117.079 | -0.001  | 118.0863 | 300 | 70.3 | Betaine                                   |
| 371.3164 | 370.308 | -0.0009 | 371.3156 | 219 | 100  | Hexanedioic Acid, Bis(2-Ethylhexyl) Ester |
| 371.3164 | 370.308 | -0.0009 | 371.3156 | 136 | 100  | Hexanedioic Acid, Bis(2-Ethylhexyl) Ester |
| 371.3164 | 370.308 | -0.0009 | 371.3156 | 138 | 100  | Hexanedioic Acid, Bis(2-Ethylhexyl) Ester |
| 371.3164 | 370.308 | -0.0009 | 371.3156 | 123 | 100  | Hexanedioic Acid, Bis(2-Ethylhexyl) Ester |
| 140.0692 | 139.063 | 0.0014  | 140.0706 | 114 | 68.2 | 5-Amino-2-Methoxyphenol                   |
| 118.0873 | 117.079 | -0.001  | 118.0863 | 414 | 48.2 | Betaine                                   |
| 118.0873 | 117.079 | -0.001  | 118.0863 | 289 | 63.9 | Betaine                                   |
| 118.0873 | 117.079 | -0.001  | 118.0863 | 328 | 63   | Betaine                                   |
| 371.3164 | 370.308 | -0.0009 | 371.3156 | 243 | 100  | Hexanedioic Acid, Bis(2-Ethylhexyl) Ester |
| 371.3164 | 370.308 | -0.0009 | 371.3156 | 177 | 100  | Hexanedioic Acid, Bis(2-Ethylhexyl) Ester |
| 371.3164 | 370.308 | -0.0009 | 371.3156 | 85  | 100  | Hexanedioic Acid, Bis(2-Ethylhexyl) Ester |
| 371.3164 | 370.308 | -0.0009 | 371.3156 | 105 | 100  | Hexanedioic Acid, Bis(2-Ethylhexyl) Ester |
| 140.0692 | 139.063 | 0.0014  | 140.0706 | 129 | 100  | 5-Amino-2-Methoxyphenol                   |
| 118.0873 | 117.079 | -0.001  | 118.0863 | 202 | 100  | Betaine                                   |
| 118.0873 | 117.079 | -0.001  | 118.0863 | 397 | 32.7 | Betaine                                   |
| 118.0873 | 117.079 | -0.001  | 118.0863 | 347 | 98.4 | Betaine                                   |
| 118.0873 | 117     | 0       | 118.09   | 347 | 25.5 | Betaine                                   |
| 371.3164 | 370.308 | -0.0009 | 371.3156 | 243 | 100  | Hexanedioic Acid, Bis(2-Ethylhexyl) Ester |
| 371.3164 | 370.308 | -0.0009 | 371.3156 | 144 | 100  | Hexanedioic Acid, Bis(2-Ethylhexyl) Ester |
| 371.3164 | 370.308 | -0.0009 | 371.3156 | 109 | 100  | Hexanedioic Acid, Bis(2-Ethylhexyl) Ester |
| 371.3164 | 370.308 | -0.0009 | 371.3156 | 97  | 100  | Hexanedioic Acid, Bis(2-Ethylhexyl) Ester |
| 97.0774  | 114.104 | 0.0238  | 97.1012  | 13  | 23.7 | Cyclopentanemethanol, .Alpha.-Methyl-     |
| 118.0873 | 117.079 | -0.001  | 118.0863 | 229 | 100  | Betaine                                   |
| 118.0873 | 117.079 | -0.001  | 118.0863 | 445 | 60.5 | Betaine                                   |
| 118.0873 | 117.079 | -0.001  | 118.0863 | 327 | 53.6 | Betaine                                   |
| 118.0873 | 117.079 | -0.001  | 118.0863 | 327 | 64   | Betaine                                   |
| 186.0588 | 370.196 | 0.0467  | 186.1055 | 69  | 100  | Ser-His-Lys                               |
| 106.0872 | 105     | 0       | 106.09   | 189 | 80.2 | Diethanolamine                            |
| 118.0873 | 117.079 | -0.001  | 118.0863 | 413 | 51.3 | Betaine                                   |
| 118.0873 | 117.079 | -0.001  | 118.0863 | 298 | 95.5 | Betaine                                   |

|          |         |         |          |     |      |                                           |
|----------|---------|---------|----------|-----|------|-------------------------------------------|
| 118.0873 | 117.079 | -0.001  | 118.0863 | 379 | 98.2 | Betaine                                   |
| 371.3164 | 370.308 | -0.0009 | 371.3156 | 226 | 100  | Hexanedioic Acid, Bis(2-Ethylhexyl) Ester |
| 371.3164 | 370.308 | -0.0009 | 371.3156 | 188 | 100  | Hexanedioic Acid, Bis(2-Ethylhexyl) Ester |
| 371.3164 | 370.308 | -0.0009 | 371.3156 | 106 | 100  | Hexanedioic Acid, Bis(2-Ethylhexyl) Ester |
| 371.3164 | 370.308 | -0.0009 | 371.3156 | 152 | 100  | Hexanedioic Acid, Bis(2-Ethylhexyl) Ester |
| 106.0872 | 105     | 0       | 106.09   | 156 | 79.3 | Diethanolamine                            |
| 106.0872 | 105.079 | -0.0009 | 106.0863 | 154 | 100  | Diethanolamine                            |
| 106.0872 | 105     | 0       | 106.09   | 225 | 53.4 | Diethanolamine                            |
| 118.0873 | 117.079 | -0.001  | 118.0863 | 284 | 63.4 | Betaine                                   |
| 118.0873 | 117.079 | -0.001  | 118.0863 | 285 | 64.5 | Betaine                                   |
| 118.0873 | 117     | 0       | 118.09   | 352 | 25.9 | Betaine                                   |
| 371.3164 | 370.308 | -0.0009 | 371.3156 | 196 | 100  | Hexanedioic Acid, Bis(2-Ethylhexyl) Ester |
| 371.3164 | 370.308 | -0.0009 | 371.3156 | 155 | 100  | Hexanedioic Acid, Bis(2-Ethylhexyl) Ester |
| 371.3164 | 370.308 | -0.0009 | 371.3156 | 141 | 100  | Hexanedioic Acid, Bis(2-Ethylhexyl) Ester |
| 371.3164 | 370.308 | -0.0009 | 371.3156 | 145 | 100  | Hexanedioic Acid, Bis(2-Ethylhexyl) Ester |
| 106.0872 | 105     | 0       | 106.09   | 247 | 75.4 | Diethanolamine                            |
| 106.0872 | 105     | 0       | 106.09   | 196 | 79.6 | Diethanolamine                            |
| 393.2988 | 392.293 | 0.0011  | 393.2999 | 42  | 100  | Chenodeoxycholic Acid                     |
| 371.3164 | 370.308 | -0.0009 | 371.3156 | 239 | 100  | Hexanedioic Acid, Bis(2-Ethylhexyl) Ester |
| 371.3164 | 370.308 | -0.0009 | 371.3156 | 132 | 100  | Hexanedioic Acid, Bis(2-Ethylhexyl) Ester |
| 371.3164 | 370.308 | -0.0009 | 371.3156 | 106 | 100  | Hexanedioic Acid, Bis(2-Ethylhexyl) Ester |
| 371.3164 | 370.308 | -0.0009 | 371.3156 | 149 | 100  | Hexanedioic Acid, Bis(2-Ethylhexyl) Ester |
| 186.0588 | 370.196 | 0.0467  | 186.1055 | 58  | 100  | Ser-His-Lys                               |
| 186.0588 | 163.084 | 0.0149  | 186.0737 | 154 | 100  | N,N-Bis(2-Hydroxyethyl)Glycine            |
| 391.2862 | 390.277 | -0.0019 | 391.2843 | 322 | 96.9 | Diethyl Phthalate                         |
| 391.2862 | 390.277 | -0.0019 | 391.2843 | 230 | 55.9 | Diethyl Phthalate                         |
| 391.2862 | 390.277 | -0.0019 | 391.2843 | 251 | 65.5 | Diethyl Phthalate                         |
| 391.2862 | 390.277 | -0.0019 | 391.2843 | 229 | 53.6 | Diethyl Phthalate                         |
| 118.0873 | 117.079 | -0.001  | 118.0863 | 398 | 56.6 | Betaine                                   |
| 118.0873 | 117.079 | -0.001  | 118.0863 | 340 | 83.5 | Betaine                                   |
| 118.0873 | 117.079 | -0.001  | 118.0863 | 339 | 42.9 | Betaine                                   |
| 371.3164 | 370.308 | -0.0009 | 371.3156 | 203 | 100  | Hexanedioic Acid, Bis(2-Ethylhexyl) Ester |
| 371.3164 | 370.308 | -0.0009 | 371.3156 | 141 | 100  | Hexanedioic Acid, Bis(2-                  |

|          |         |         |          |     |      |                                           |
|----------|---------|---------|----------|-----|------|-------------------------------------------|
|          |         |         |          |     |      | Ethylhexyl) Ester                         |
| 371.3164 | 370.308 | -0.0009 | 371.3156 | 98  | 100  | Hexanedioic Acid, Bis(2-Ethylhexyl) Ester |
| 371.3164 | 370.308 | -0.0009 | 371.3156 | 194 | 100  | Hexanedioic Acid, Bis(2-Ethylhexyl) Ester |
| 97.0774  | 114.104 | 0.0238  | 97.1012  | 44  | 23.5 | Cyclohexanemethanol                       |
| 106.0872 | 105     | 0       | 106.09   | 159 | 74.6 | Diethanolamine                            |
| 118.0873 | 117.079 | -0.001  | 118.0863 | 374 | 47.5 | Betaine                                   |
| 118.0873 | 117.079 | -0.001  | 118.0863 | 241 | 86.4 | Betaine                                   |
| 118.0873 | 117     | 0       | 118.09   | 347 | 22.7 | Betaine                                   |
| 371.3164 | 370.308 | -0.0009 | 371.3156 | 236 | 100  | Hexanedioic Acid, Bis(2-Ethylhexyl) Ester |
| 371.3164 | 370.308 | -0.0009 | 371.3156 | 194 | 100  | Hexanedioic Acid, Bis(2-Ethylhexyl) Ester |
| 371.3164 | 370.308 | -0.0009 | 371.3156 | 60  | 100  | Hexanedioic Acid, Bis(2-Ethylhexyl) Ester |
| 371.3164 | 370.308 | -0.0009 | 371.3156 | 162 | 100  | Hexanedioic Acid, Bis(2-Ethylhexyl) Ester |
| 97.0774  | 114.104 | 0.0238  | 97.1012  | 12  | 53.1 | Cyclohexanol, 2-Methyl-, Trans-           |
| 106.0872 | 105     | 0       | 106.09   | 159 | 75.6 | Diethanolamine                            |
| 106.0872 | 105     | 0       | 106.09   | 173 | 81.7 | Diethanolamine                            |
| 391.2862 | 390.277 | -0.0019 | 391.2843 | 325 | 97.9 | Diethyl Phthalate                         |
| 391.2862 | 390.277 | -0.0019 | 391.2843 | 245 | 95.4 | Diethyl Phthalate                         |
| 391.2862 | 390.277 | -0.0019 | 391.2843 | 236 | 52.6 | Diethyl Phthalate                         |
| 391.2862 | 390.277 | -0.0019 | 391.2843 | 190 | 55.2 | Diethyl Phthalate                         |
| 371.3164 | 370.308 | -0.0009 | 371.3156 | 220 | 100  | Hexanedioic Acid, Bis(2-Ethylhexyl) Ester |
| 371.3164 | 370.308 | -0.0009 | 371.3156 | 163 | 100  | Hexanedioic Acid, Bis(2-Ethylhexyl) Ester |
| 371.3164 | 370.308 | -0.0009 | 371.3156 | 82  | 100  | Hexanedioic Acid, Bis(2-Ethylhexyl) Ester |
| 371.3164 | 370.308 | -0.0009 | 371.3156 | 108 | 100  | Hexanedioic Acid, Bis(2-Ethylhexyl) Ester |
| 118.0873 | 117.079 | -0.001  | 118.0863 | 294 | 38.1 | Betaine                                   |
| 118.0873 | 117     | 0       | 118.09   | 402 | 30.4 | Betaine                                   |
| 118.0873 | 117.079 | -0.001  | 118.0863 | 299 | 67.2 | Betaine                                   |
| 118.0873 | 117.079 | -0.001  | 118.0863 | 306 | 65.5 | Betaine                                   |
| 106.0872 | 105     | 0       | 106.09   | 157 | 74.4 | Diethanolamine                            |
| 391.2862 | 390.277 | -0.0019 | 391.2843 | 371 | 98.8 | Diethyl Phthalate                         |
| 391.2862 | 390.277 | -0.0019 | 391.2843 | 244 | 52.5 | Diethyl Phthalate                         |
| 391.2862 | 390.277 | -0.0019 | 391.2843 | 234 | 52   | Diethyl Phthalate                         |
| 391.2862 | 390.277 | -0.0019 | 391.2843 | 202 | 54.8 | Diethyl Phthalate                         |
| 371.3164 | 370.308 | -0.0009 | 371.3156 | 203 | 100  | Hexanedioic Acid, Bis(2-Ethylhexyl) Ester |
| 371.3164 | 370.308 | -0.0009 | 371.3156 | 151 | 100  | Hexanedioic Acid, Bis(2-                  |

|          |         |         |          |     |      |                                           |
|----------|---------|---------|----------|-----|------|-------------------------------------------|
|          |         |         |          |     |      | Ethylhexyl) Ester                         |
| 371.3164 | 370.308 | -0.0009 | 371.3156 | 102 | 100  | Hexanedioic Acid, Bis(2-Ethylhexyl) Ester |
| 371.3164 | 370.308 | -0.0009 | 371.3156 | 140 | 100  | Hexanedioic Acid, Bis(2-Ethylhexyl) Ester |
| 118.0873 | 117.079 | -0.001  | 118.0863 | 358 | 62.7 | Betaine                                   |
| 118.0873 | 117.079 | -0.001  | 118.0863 | 326 | 59.7 | Betaine                                   |
| 118.0873 | 117.079 | -0.001  | 118.0863 | 312 | 64.4 | Betaine                                   |
| 391.2862 | 390.277 | -0.0019 | 391.2843 | 347 | 98.5 | Diocetyl Phthalate                        |
| 391.2862 | 390.277 | -0.0019 | 391.2843 | 221 | 95   | Diocetyl Phthalate                        |
| 391.2862 | 390.277 | -0.0019 | 391.2843 | 196 | 55.1 | Diocetyl Phthalate                        |
| 391.2862 | 390.277 | -0.0019 | 391.2843 | 238 | 53.9 | Diocetyl Phthalate                        |
| 371.3164 | 370.308 | -0.0009 | 371.3156 | 213 | 100  | Hexanedioic Acid, Bis(2-Ethylhexyl) Ester |
| 371.3164 | 370.308 | -0.0009 | 371.3156 | 163 | 100  | Hexanedioic Acid, Bis(2-Ethylhexyl) Ester |
| 371.3164 | 370.308 | -0.0009 | 371.3156 | 152 | 100  | Hexanedioic Acid, Bis(2-Ethylhexyl) Ester |
| 371.3164 | 370.308 | -0.0009 | 371.3156 | 151 | 100  | Hexanedioic Acid, Bis(2-Ethylhexyl) Ester |
| 118.0873 | 117.079 | -0.001  | 118.0863 | 358 | 61   | Betaine                                   |
| 118.0873 | 117.079 | -0.001  | 118.0863 | 304 | 67.6 | Betaine                                   |
| 118.0873 | 117.079 | -0.001  | 118.0863 | 287 | 63.7 | Betaine                                   |
| 371.3164 | 370.308 | -0.0009 | 371.3156 | 175 | 100  | Hexanedioic Acid, Bis(2-Ethylhexyl) Ester |
| 371.3164 | 370.308 | -0.0009 | 371.3156 | 154 | 100  | Hexanedioic Acid, Bis(2-Ethylhexyl) Ester |
| 371.3164 | 370.308 | -0.0009 | 371.3156 | 87  | 100  | Hexanedioic Acid, Bis(2-Ethylhexyl) Ester |
| 371.3164 | 370.308 | -0.0009 | 371.3156 | 157 | 100  | Hexanedioic Acid, Bis(2-Ethylhexyl) Ester |
| 118.0873 | 117.079 | -0.001  | 118.0863 | 315 | 30.2 | Betaine                                   |
| 118.0873 | 117.079 | -0.001  | 118.0863 | 333 | 81.9 | Betaine                                   |
| 118.0873 | 117.079 | -0.001  | 118.0863 | 297 | 66.5 | Betaine                                   |
| 97.0774  | 114.104 | 0.0238  | 97.1012  | 44  | 24   | Cyclohexanol, 1-Methyl-                   |
| 338.3423 | 337.334 | -0.0005 | 338.3417 | 165 | 100  | 13-Docosenamide, (Z)-                     |
| 338.3423 | 337.334 | -0.0005 | 338.3417 | 291 | 100  | 13-Docosenamide, (Z)-                     |
| 338.3423 | 337.334 | -0.0005 | 338.3417 | 83  | 100  | 13-Docosenamide, (Z)-                     |
| 338.3423 | 337.334 | -0.0005 | 338.3417 | 194 | 100  | 13-Docosenamide, (Z)-                     |
| 371.3164 | 370.308 | -0.0009 | 371.3156 | 195 | 100  | Hexanedioic Acid, Bis(2-Ethylhexyl) Ester |
| 371.3164 | 370.308 | -0.0009 | 371.3156 | 161 | 100  | Hexanedioic Acid, Bis(2-Ethylhexyl) Ester |
| 371.3164 | 370.308 | -0.0009 | 371.3156 | 105 | 100  | Hexanedioic Acid, Bis(2-Ethylhexyl) Ester |
| 371.3164 | 370.308 | -0.0009 | 371.3156 | 183 | 100  | Hexanedioic Acid, Bis(2-                  |

|          |         |         |          |     |      |                                             |
|----------|---------|---------|----------|-----|------|---------------------------------------------|
|          |         |         |          |     |      | Ethylhexyl) Ester                           |
| 419.3188 | 418.308 | -0.0032 | 419.3156 | 158 | 100  | 1,2-Benzenedicarboxylic Acid, Dinonyl Ester |
| 419.3188 | 418.308 | -0.0032 | 419.3156 | 202 | 100  | 1,2-Benzenedicarboxylic Acid, Dinonyl Ester |
| 419.3188 | 418.308 | -0.0032 | 419.3156 | 208 | 100  | 1,2-Benzenedicarboxylic Acid, Dinonyl Ester |
| 419.3188 | 418.308 | -0.0032 | 419.3156 | 209 | 100  | 1,2-Benzenedicarboxylic Acid, Dinonyl Ester |
| 419.3188 | 418.308 | -0.0032 | 419.3156 | 160 | 100  | 1,2-Benzenedicarboxylic Acid, Dinonyl Ester |
| 419.3188 | 418.308 | -0.0032 | 419.3156 | 204 | 100  | 1,2-Benzenedicarboxylic Acid, Dinonyl Ester |
| 419.3188 | 418.308 | -0.0032 | 419.3156 | 209 | 100  | 1,2-Benzenedicarboxylic Acid, Dinonyl Ester |
| 371.3164 | 370.308 | -0.0009 | 371.3156 | 218 | 100  | Hexanedioic Acid, Bis(2-Ethylhexyl) Ester   |
| 371.3164 | 370.308 | -0.0009 | 371.3156 | 153 | 100  | Hexanedioic Acid, Bis(2-Ethylhexyl) Ester   |
| 371.3164 | 370.308 | -0.0009 | 371.3156 | 93  | 100  | Hexanedioic Acid, Bis(2-Ethylhexyl) Ester   |
| 371.3164 | 370.308 | -0.0009 | 371.3156 | 84  | 100  | Hexanedioic Acid, Bis(2-Ethylhexyl) Ester   |
| 118.0873 | 117.079 | -0.001  | 118.0863 | 286 | 42   | Betaine                                     |
| 118.0873 | 117.079 | -0.001  | 118.0863 | 319 | 63.4 | Betaine                                     |
| 371.3164 | 370.308 | -0.0009 | 371.3156 | 201 | 100  | Hexanedioic Acid, Bis(2-Ethylhexyl) Ester   |
| 371.3164 | 370.308 | -0.0009 | 371.3156 | 173 | 100  | Hexanedioic Acid, Bis(2-Ethylhexyl) Ester   |
| 371.3164 | 370.308 | -0.0009 | 371.3156 | 86  | 100  | Hexanedioic Acid, Bis(2-Ethylhexyl) Ester   |
| 371.3164 | 370.308 | -0.0009 | 371.3156 | 123 | 100  | Hexanedioic Acid, Bis(2-Ethylhexyl) Ester   |
| 118.0873 | 117.079 | -0.001  | 118.0863 | 267 | 83.5 | Betaine                                     |
| 118.0873 | 117.079 | -0.001  | 118.0863 | 271 | 63.1 | Betaine                                     |
| 118.0873 | 117.079 | -0.001  | 118.0863 | 309 | 53.2 | Betaine                                     |
| 97.0774  | 114.104 | 0.0238  | 97.1012  | 41  | 26.9 | Cyclohexanol, 4-Methyl-, Trans-             |
| 419.3188 | 418.308 | -0.0032 | 419.3156 | 181 | 100  | 1,2-Benzenedicarboxylic Acid, Dinonyl Ester |
| 419.3188 | 418.308 | -0.0032 | 419.3156 | 204 | 100  | 1,2-Benzenedicarboxylic Acid, Dinonyl Ester |
| 419.3188 | 418.308 | -0.0032 | 419.3156 | 206 | 100  | 1,2-Benzenedicarboxylic Acid, Dinonyl Ester |
| 419.3188 | 418.308 | -0.0032 | 419.3156 | 206 | 100  | 1,2-Benzenedicarboxylic Acid, Dinonyl Ester |
| 118.0873 | 117.079 | -0.001  | 118.0863 | 263 | 100  | Betaine                                     |
| 118.0873 | 117.079 | -0.001  | 118.0863 | 284 | 61.9 | Betaine                                     |
| 97.0774  | 114.104 | 0.0238  | 97.1012  | 34  | 22.3 | Cyclohexanol, 1-Methyl-                     |

|          |         |         |          |     |      |                                             |
|----------|---------|---------|----------|-----|------|---------------------------------------------|
| 419.3188 | 418.308 | -0.0032 | 419.3156 | 204 | 100  | 1,2-Benzenedicarboxylic Acid, Dinonyl Ester |
| 419.3188 | 418.308 | -0.0032 | 419.3156 | 207 | 100  | 1,2-Benzenedicarboxylic Acid, Dinonyl Ester |
| 419.3188 | 418.308 | -0.0032 | 419.3156 | 210 | 100  | 1,2-Benzenedicarboxylic Acid, Dinonyl Ester |
| 419.3188 | 418.308 | -0.0032 | 419.3156 | 204 | 100  | 1,2-Benzenedicarboxylic Acid, Dinonyl Ester |
| 371.3239 | 370.308 | -0.0083 | 371.3156 | 242 | 100  | Hexanedioic Acid, Bis(2-Ethylhexyl) Ester   |
| 371.3239 | 370.308 | -0.0083 | 371.3156 | 148 | 100  | Hexanedioic Acid, Bis(2-Ethylhexyl) Ester   |
| 371.3239 | 370.308 | -0.0083 | 371.3156 | 49  | 100  | Hexanedioic Acid, Bis(2-Ethylhexyl) Ester   |
| 371.3239 | 370.308 | -0.0083 | 371.3156 | 169 | 100  | Hexanedioic Acid, Bis(2-Ethylhexyl) Ester   |
| 118.0941 | 117.079 | -0.0078 | 118.0863 | 284 | 75.8 | Betaine                                     |
| 118.0941 | 117.079 | -0.0078 | 118.0863 | 383 | 53.6 | Betaine                                     |
| 118.0941 | 117.079 | -0.0078 | 118.0863 | 276 | 32.7 | Betaine                                     |
| 118.0941 | 117.079 | -0.0078 | 118.0863 | 309 | 44.9 | Betaine                                     |
| 419.3188 | 418.308 | -0.0032 | 419.3156 | 212 | 100  | 1,2-Benzenedicarboxylic Acid, Dinonyl Ester |
| 419.3188 | 418.308 | -0.0032 | 419.3156 | 203 | 100  | 1,2-Benzenedicarboxylic Acid, Dinonyl Ester |
| 419.3188 | 418.308 | -0.0032 | 419.3156 | 207 | 100  | 1,2-Benzenedicarboxylic Acid, Dinonyl Ester |
| 419.3188 | 418.308 | -0.0032 | 419.3156 | 198 | 100  | 1,2-Benzenedicarboxylic Acid, Dinonyl Ester |
| 371.3164 | 370.308 | -0.0009 | 371.3156 | 175 | 100  | Hexanedioic Acid, Bis(2-Ethylhexyl) Ester   |
| 371.3164 | 370.308 | -0.0009 | 371.3156 | 143 | 100  | Hexanedioic Acid, Bis(2-Ethylhexyl) Ester   |
| 371.3164 | 370.308 | -0.0009 | 371.3156 | 71  | 100  | Hexanedioic Acid, Bis(2-Ethylhexyl) Ester   |
| 371.3164 | 370.308 | -0.0009 | 371.3156 | 180 | 100  | Hexanedioic Acid, Bis(2-Ethylhexyl) Ester   |
| 118.0873 | 117.079 | -0.001  | 118.0863 | 313 | 56.3 | Betaine                                     |
| 118.0873 | 117.079 | -0.001  | 118.0863 | 256 | 100  | Betaine                                     |
| 118.0873 | 117.079 | -0.001  | 118.0863 | 329 | 40.6 | Betaine                                     |
| 118.0873 | 117.079 | -0.001  | 118.0863 | 308 | 58.8 | Betaine                                     |
| 118.0873 | 117.079 | -0.001  | 118.0863 | 282 | 64.4 | Betaine                                     |
| 118.0873 | 117.079 | -0.001  | 118.0863 | 291 | 28.2 | Betaine                                     |
| 371.3164 | 370.308 | -0.0009 | 371.3156 | 174 | 100  | Hexanedioic Acid, Bis(2-Ethylhexyl) Ester   |
| 371.3164 | 370.308 | -0.0009 | 371.3156 | 128 | 100  | Hexanedioic Acid, Bis(2-Ethylhexyl) Ester   |
| 371.3164 | 370.308 | -0.0009 | 371.3156 | 103 | 100  | Hexanedioic Acid, Bis(2-Ethylhexyl) Ester   |

|          |         |         |          |     |      |                                             |
|----------|---------|---------|----------|-----|------|---------------------------------------------|
| 371.3164 | 370.308 | -0.0009 | 371.3156 | 177 | 100  | Hexanedioic Acid, Bis(2-Ethylhexyl) Ester   |
| 393.2988 | 392.293 | 0.0011  | 393.2999 | 45  | 100  | Chenodeoxycholic Acid                       |
| 419.3188 | 418.308 | -0.0032 | 419.3156 | 210 | 100  | 1,2-Benzenedicarboxylic Acid, Dinonyl Ester |
| 419.3188 | 418.308 | -0.0032 | 419.3156 | 203 | 100  | 1,2-Benzenedicarboxylic Acid, Dinonyl Ester |
| 419.3188 | 418.308 | -0.0032 | 419.3156 | 211 | 100  | 1,2-Benzenedicarboxylic Acid, Dinonyl Ester |
| 419.3188 | 418.308 | -0.0032 | 419.3156 | 196 | 100  | 1,2-Benzenedicarboxylic Acid, Dinonyl Ester |
| 118.0873 | 117.079 | -0.001  | 118.0863 | 146 | 100  | N-Methyl-.Alpha.-Aminoisobutyric Acid       |
| 118.0873 | 117.079 | -0.001  | 118.0863 | 369 | 66.2 | Betaine                                     |
| 118.0873 | 117.079 | -0.001  | 118.0863 | 277 | 60.2 | Betaine                                     |
| 118.0873 | 117.079 | -0.001  | 118.0863 | 339 | 36.6 | Betaine                                     |
| 106.0872 | 105     | 0       | 106.09   | 152 | 77.2 | Diethanolamine                              |
| 106.0872 | 105.079 | -0.0009 | 106.0863 | 115 | 100  | Diethanolamine                              |
| 393.2988 | 392.293 | 0.0011  | 393.2999 | 36  | 100  | Chenodeoxycholic Acid                       |
| 419.3188 | 418.308 | -0.0032 | 419.3156 | 204 | 100  | 1,2-Benzenedicarboxylic Acid, Dinonyl Ester |
| 419.3188 | 418.308 | -0.0032 | 419.3156 | 208 | 100  | 1,2-Benzenedicarboxylic Acid, Dinonyl Ester |
| 419.3188 | 418.308 | -0.0032 | 419.3156 | 202 | 100  | 1,2-Benzenedicarboxylic Acid, Dinonyl Ester |
| 419.3188 | 418.308 | -0.0032 | 419.3156 | 206 | 100  | 1,2-Benzenedicarboxylic Acid, Dinonyl Ester |
| 371.3164 | 370.308 | -0.0009 | 371.3156 | 195 | 100  | Hexanedioic Acid, Bis(2-Ethylhexyl) Ester   |
| 371.3164 | 370.308 | -0.0009 | 371.3156 | 138 | 100  | Hexanedioic Acid, Bis(2-Ethylhexyl) Ester   |
| 371.3164 | 370.308 | -0.0009 | 371.3156 | 115 | 100  | Hexanedioic Acid, Bis(2-Ethylhexyl) Ester   |
| 393.2988 | 392.293 | 0.0011  | 393.2999 | 33  | 100  | Chenodeoxycholic Acid                       |
| 84.0822  | 102.092 | -0.0014 | 84.0808  | 226 | 51   | Betaine Aldehyde Cation                     |
| 84.0822  | 102.092 | -0.0014 | 84.0808  | 177 | 51   | Betaine Aldehyde Cation                     |
| 84.0822  | 102.092 | -0.0014 | 84.0808  | 138 | 51   | Betaine Aldehyde Cation                     |
| 118.0873 | 117.079 | -0.001  | 118.0863 | 311 | 49.1 | Betaine                                     |
| 118.0873 | 117.079 | -0.001  | 118.0863 | 331 | 70.8 | Betaine                                     |
| 118.0873 | 117.079 | -0.001  | 118.0863 | 310 | 40.7 | Betaine                                     |
| 106.0872 | 105     | 0       | 106.09   | 168 | 73.3 | Diethanolamine                              |
| 106.0872 | 105     | 0       | 106.09   | 150 | 78.2 | Diethanolamine                              |
| 106.0872 | 105     | 0       | 106.09   | 227 | 66   | Diethanolamine                              |
| 419.3188 | 418.308 | -0.0032 | 419.3156 | 205 | 100  | 1,2-Benzenedicarboxylic Acid, Dinonyl Ester |
| 118.0873 | 117.079 | -0.001  | 118.0863 | 347 | 39.5 | Betaine                                     |



|          |         |         |          |     |      |                                       |
|----------|---------|---------|----------|-----|------|---------------------------------------|
| 118.0873 | 117.079 | -0.001  | 118.0863 | 299 | 72.7 | Betaine                               |
| 118.0873 | 117.079 | -0.001  | 118.0863 | 344 | 53.2 | Betaine                               |
| 106.0872 | 105     | 0       | 106.09   | 114 | 53.1 | Diethanolamine                        |
| 106.0872 | 105     | 0       | 106.09   | 210 | 68.7 | Diethanolamine                        |
| 84.0822  | 102.092 | -0.0014 | 84.0808  | 253 | 53.1 | Betaine Aldehyde Cation               |
| 84.0822  | 102.092 | -0.0014 | 84.0808  | 211 | 50   | Betaine Aldehyde Cation               |
| 186.0588 | 203.091 | 0.0285  | 186.0873 | 71  | 75.3 | Ala-Asn                               |
| 186.0588 | 163.084 | 0.0149  | 186.0737 | 146 | 100  | N,N-Bis(2-Hydroxyethyl)Glycine        |
| 118.0873 | 117.079 | -0.001  | 118.0863 | 395 | 37.1 | Betaine                               |
| 118.0873 | 117.079 | -0.001  | 118.0863 | 301 | 67.1 | Betaine                               |
| 118.0873 | 117.079 | -0.001  | 118.0863 | 354 | 48.8 | Betaine                               |
| 106.0872 | 105     | 0       | 106.09   | 159 | 78.9 | Diethanolamine                        |
| 106.0872 | 105     | 0       | 106.09   | 231 | 79.3 | Diethanolamine                        |
| 106.0872 | 105.079 | -0.0009 | 106.0863 | 152 | 100  | Diethanolamine                        |
| 84.0822  | 102.092 | -0.0014 | 84.0808  | 261 | 51   | Betaine Aldehyde Cation               |
| 84.0822  | 102.092 | -0.0014 | 84.0808  | 206 | 51   | Betaine Aldehyde Cation               |
| 84.0822  | 102.092 | -0.0014 | 84.0808  | 181 | 52   | Betaine Aldehyde Cation               |
| 106.0872 | 105.079 | -0.0009 | 106.0863 | 126 | 100  | Diethanolamine                        |
| 84.0822  | 102.092 | -0.0014 | 84.0808  | 178 | 50   | Betaine Aldehyde Cation               |
| 84.0822  | 102.092 | -0.0014 | 84.0808  | 202 | 51   | Betaine Aldehyde Cation               |
| 84.0822  | 102.092 | -0.0014 | 84.0808  | 138 | 51   | Betaine Aldehyde Cation               |
| 553.3927 | 530.4   | -0.003  | 553.3897 | 1   | 17.2 | Didodecyl 3,3'-Thiodipropionate Oxide |
| 553.3927 | 530.4   | -0.003  | 553.3897 | 4   | 7.7  | Didodecyl 3,3'-Thiodipropionate Oxide |
| 553.3927 | 530.4   | -0.003  | 553.3897 | 10  | 8.5  | Didodecyl 3,3'-Thiodipropionate Oxide |
| 118.0873 | 117.079 | -0.001  | 118.0863 | 336 | 55.2 | Betaine                               |
| 118.0873 | 117.079 | -0.001  | 118.0863 | 269 | 62.3 | Betaine                               |
| 118.0873 | 117     | 0       | 118.09   | 343 | 24.5 | Betaine                               |
| 553.3927 | 530.4   | -0.003  | 553.3897 | 88  | 14.4 | Didodecyl 3,3'-Thiodipropionate Oxide |
| 531.4089 | 530.4   | -0.0011 | 531.4078 | 242 | 19.9 | Didodecyl 3,3'-Thiodipropionate Oxide |
| 531.4089 | 530.4   | -0.0011 | 531.4078 | 318 | 17.5 | Didodecyl 3,3'-Thiodipropionate Oxide |
| 531.4089 | 530.4   | -0.0011 | 531.4078 | 197 | 14   | Didodecyl 3,3'-Thiodipropionate Oxide |
| 531.4089 | 530.4   | -0.0011 | 531.4078 | 297 | 35.6 | Didodecyl 3,3'-Thiodipropionate Oxide |
| 118.0873 | 117.079 | -0.001  | 118.0863 | 366 | 24   | Betaine                               |
| 118.0873 | 117.079 | -0.001  | 118.0863 | 278 | 62.9 | Betaine                               |
| 118.0873 | 117.079 | -0.001  | 118.0863 | 337 | 42.2 | Betaine                               |
| 553.3927 | 530.4   | -0.003  | 553.3897 | 3   | 21.3 | Didodecyl 3,3'-Thiodipropionate       |

|          |         |         |          |     |      |                                       |
|----------|---------|---------|----------|-----|------|---------------------------------------|
|          |         |         |          |     |      | Oxide                                 |
| 553.3927 | 530.4   | -0.003  | 553.3897 | 38  | 10.8 | Didodecyl 3,3'-Thiodipropionate Oxide |
| 553.3927 | 530.4   | -0.003  | 553.3897 | 78  | 14.4 | Didodecyl 3,3'-Thiodipropionate Oxide |
| 97.0774  | 114.104 | 0.0238  | 97.1012  | 28  | 35.8 | Cyclohexanemethanol                   |
| 97.0774  | 114.104 | 0.0238  | 97.1012  | 29  | 21.7 | Cyclohexanemethanol                   |
| 531.4089 | 530.4   | -0.0011 | 531.4078 | 358 | 19.2 | Didodecyl 3,3'-Thiodipropionate Oxide |
| 531.4089 | 530.4   | -0.0011 | 531.4078 | 367 | 23.2 | Didodecyl 3,3'-Thiodipropionate Oxide |
| 531.4089 | 530.4   | -0.0011 | 531.4078 | 241 | 28.3 | Didodecyl 3,3'-Thiodipropionate Oxide |
| 531.4089 | 530.4   | -0.0011 | 531.4078 | 259 | 28.1 | Didodecyl 3,3'-Thiodipropionate Oxide |
| 106.0872 | 105     | 0       | 106.09   | 149 | 77.9 | Diethanolamine                        |
| 553.3927 | 530.4   | -0.003  | 553.3897 | 14  | 15.3 | Didodecyl 3,3'-Thiodipropionate Oxide |
| 553.3927 | 530.4   | -0.003  | 553.3897 | 6   | 8.3  | Didodecyl 3,3'-Thiodipropionate Oxide |
| 553.3927 | 530.4   | -0.003  | 553.3897 | 1   | 20.6 | Didodecyl 3,3'-Thiodipropionate Oxide |
| 118.0873 | 117.079 | -0.001  | 118.0863 | 177 | 100  | Betaine                               |
| 118.0873 | 117.079 | -0.001  | 118.0863 | 381 | 62.8 | Betaine                               |
| 118.0873 | 117.079 | -0.001  | 118.0863 | 321 | 98.8 | Betaine                               |
| 118.0873 | 117.079 | -0.001  | 118.0863 | 343 | 37.3 | Betaine                               |
| 531.4089 | 530.4   | -0.0011 | 531.4078 | 317 | 30.4 | Didodecyl 3,3'-Thiodipropionate Oxide |
| 531.4089 | 530.4   | -0.0011 | 531.4078 | 269 | 13.2 | Didodecyl 3,3'-Thiodipropionate Oxide |
| 531.4089 | 530.4   | -0.0011 | 531.4078 | 227 | 23.9 | Didodecyl 3,3'-Thiodipropionate Oxide |
| 531.4089 | 530.4   | -0.0011 | 531.4078 | 218 | 15.9 | Didodecyl 3,3'-Thiodipropionate Oxide |
| 97.0774  | 114.104 | 0.0238  | 97.1012  | 71  | 25.7 | Cyclohexanol, 1-Methyl-               |
| 84.0822  | 102.092 | -0.0014 | 84.0808  | 244 | 50   | Betaine Aldehyde Cation               |
| 84.0822  | 102.092 | -0.0014 | 84.0808  | 210 | 51   | Betaine Aldehyde Cation               |
| 186.0588 | 163.084 | 0.0149  | 186.0737 | 137 | 100  | N,N-Bis(2-Hydroxyethyl)Glycine        |
| 186.0588 | 163.084 | 0.0149  | 186.0737 | 154 | 100  | N,N-Bis(2-Hydroxyethyl)Glycine        |
| 118.0873 | 117.079 | -0.001  | 118.0863 | 340 | 32.5 | Betaine                               |
| 118.0873 | 117.079 | -0.001  | 118.0863 | 330 | 39.3 | Betaine                               |
| 118.0873 | 117.079 | -0.001  | 118.0863 | 323 | 56.6 | Betaine                               |
| 97.0774  | 114.104 | 0.0238  | 97.1012  | 43  | 26.6 | Cyclohexanol, 1-Methyl-               |
| 106.0872 | 105     | 0       | 106.09   | 152 | 74.8 | Diethanolamine                        |
| 553.3927 | 530.4   | -0.003  | 553.3897 | 12  | 9    | Didodecyl 3,3'-Thiodipropionate Oxide |

|          |         |         |          |     |      |                                       |
|----------|---------|---------|----------|-----|------|---------------------------------------|
| 118.0873 | 117.079 | -0.001  | 118.0863 | 378 | 49.4 | Betaine                               |
| 118.0873 | 117.079 | -0.001  | 118.0863 | 321 | 61.3 | Betaine                               |
| 118.0873 | 117.079 | -0.001  | 118.0863 | 304 | 70.8 | Betaine                               |
| 97.0774  | 114.104 | 0.0238  | 97.1012  | 51  | 23.9 | Cyclohexanemethanol                   |
| 106.0872 | 105     | 0       | 106.09   | 144 | 74.9 | Diethanolamine                        |
| 106.0872 | 105     | 0       | 106.09   | 197 | 74.9 | Diethanolamine                        |
| 553.3927 | 530.4   | -0.003  | 553.3897 | 70  | 13.7 | Didodecyl 3,3'-Thiodipropionate Oxide |
| 553.3927 | 530.4   | -0.003  | 553.3897 | 57  | 15.6 | Didodecyl 3,3'-Thiodipropionate Oxide |
| 118.0873 | 117.079 | -0.001  | 118.0863 | 365 | 35.7 | Betaine                               |
| 118.0873 | 117.079 | -0.001  | 118.0863 | 374 | 49.7 | Betaine                               |
| 118.0873 | 117.079 | -0.001  | 118.0863 | 351 | 55.1 | Betaine                               |
| 106.0872 | 105     | 0       | 106.09   | 157 | 77.6 | Diethanolamine                        |
| 118.0873 | 117.079 | -0.001  | 118.0863 | 263 | 79.3 | Betaine                               |
| 118.0873 | 117.079 | -0.001  | 118.0863 | 357 | 92.1 | Betaine                               |
| 118.0873 | 117.079 | -0.001  | 118.0863 | 285 | 63   | Betaine                               |
| 118.0873 | 117.079 | -0.001  | 118.0863 | 342 | 35.6 | Betaine                               |
| 97.0774  | 114.104 | 0.0238  | 97.1012  | 87  | 21.1 | Cyclohexanol, 1-Methyl-               |
| 106.0872 | 105     | 0       | 106.09   | 165 | 74.5 | Diethanolamine                        |
| 106.0872 | 105     | 0       | 106.09   | 151 | 78.9 | Diethanolamine                        |
| 84.0822  | 102.092 | -0.0014 | 84.0808  | 207 | 53.1 | Betaine Aldehyde Cation               |
| 84.0822  | 102.092 | -0.0014 | 84.0808  | 183 | 52   | Betaine Aldehyde Cation               |
| 84.0822  | 102.092 | -0.0014 | 84.0808  | 147 | 52   | Betaine Aldehyde Cation               |
| 186.0588 | 163.084 | 0.0149  | 186.0737 | 186 | 95.3 | N,N-Bis(2-Hydroxyethyl)Glycine        |
| 118.0873 | 117.079 | -0.001  | 118.0863 | 341 | 34.4 | Betaine                               |
| 118.0873 | 117.079 | -0.001  | 118.0863 | 282 | 61.1 | Betaine                               |
| 118.0873 | 117.079 | -0.001  | 118.0863 | 281 | 66   | Betaine                               |
| 106.0872 | 105     | 0       | 106.09   | 155 | 75.8 | Diethanolamine                        |
| 106.0872 | 105     | 0       | 106.09   | 153 | 80.4 | Diethanolamine                        |
| 84.0822  | 102.092 | -0.0014 | 84.0808  | 294 | 53.1 | Betaine Aldehyde Cation               |
| 84.0822  | 102.092 | -0.0014 | 84.0808  | 218 | 55.4 | Betaine Aldehyde Cation               |
| 84.0822  | 102.092 | -0.0014 | 84.0808  | 129 | 52   | Betaine Aldehyde Cation               |
| 186.0588 | 163.084 | 0.0149  | 186.0737 | 149 | 100  | N,N-Bis(2-Hydroxyethyl)Glycine        |
| 186.0588 | 370.196 | 0.0467  | 186.1055 | 70  | 100  | Ser-His-Lys                           |
| 186.0588 | 163.084 | 0.0149  | 186.0737 | 166 | 100  | N,N-Bis(2-Hydroxyethyl)Glycine        |
| 118.0873 | 117.079 | -0.001  | 118.0863 | 389 | 37.7 | Betaine                               |
| 118.0873 | 117.079 | -0.001  | 118.0863 | 248 | 49.5 | Betaine                               |
| 118.0873 | 117.079 | -0.001  | 118.0863 | 312 | 40.1 | Betaine                               |
| 97.0774  | 114.104 | 0.0238  | 97.1012  | 6   | 100  | Cyclopentanemethanol, .Alpha.-Methyl- |
| 106.0872 | 105     | 0       | 106.09   | 154 | 74.9 | Diethanolamine                        |

|          |         |         |          |     |      |                                         |
|----------|---------|---------|----------|-----|------|-----------------------------------------|
| 106.0872 | 105     | 0       | 106.09   | 155 | 78.6 | Diethanolamine                          |
| 610.5771 | 610     | -0.04   | 610.54   | 125 | 50   | DG 34:2; [M+NH4]+;<br>DG(14:1/20:1/0:0) |
| 610.5771 | 610     | -0.04   | 610.54   | 120 | 50   | DG 34:2; [M+NH4]+;<br>DG(14:1/20:1/0:0) |
| 610.5771 | 610     | -0.04   | 610.54   | 81  | 50   | DG 34:2; [M+NH4]+;<br>DG(14:1/20:1/0:0) |
| 640.5867 | 640     | 0       | 640.59   | 139 | 50   | DG 36:1; [M+NH4]+;<br>DG(14:1/22:0/0:0) |
| 640.5867 | 640     | 0       | 640.59   | 128 | 50   | DG 36:1; [M+NH4]+;<br>DG(14:1/22:0/0:0) |
| 640.5867 | 640     | 0       | 640.59   | 126 | 50   | DG 36:1; [M+NH4]+;<br>DG(14:1/22:0/0:0) |
| 84.0822  | 102.092 | -0.0014 | 84.0808  | 233 | 54.2 | Betaine Aldehyde Cation                 |
| 84.0822  | 102.092 | -0.0014 | 84.0808  | 193 | 50   | Betaine Aldehyde Cation                 |
| 186.0588 | 203.091 | 0.0285  | 186.0873 | 82  | 82.7 | Ala-Asn                                 |
| 186.0588 | 163.084 | 0.0149  | 186.0737 | 158 | 92.5 | N,N-Bis(2-Hydroxyethyl)Glycine          |
| 640.5867 | 640     | 0       | 640.59   | 153 | 50   | DG 36:1; [M+NH4]+;<br>DG(14:1/22:0/0:0) |
| 640.5867 | 640     | 0       | 640.59   | 154 | 50   | DG 36:1; [M+NH4]+;<br>DG(14:1/22:0/0:0) |
| 118.0873 | 117.079 | -0.001  | 118.0863 | 380 | 65.3 | Betaine                                 |
| 118.0873 | 117.079 | -0.001  | 118.0863 | 308 | 76.2 | Betaine                                 |
| 118.0873 | 117.079 | -0.001  | 118.0863 | 311 | 63.4 | Betaine                                 |
| 610.5771 | 610     | -0.04   | 610.54   | 156 | 50   | DG 34:2; [M+NH4]+;<br>DG(14:1/20:1/0:0) |
| 636.5935 | 636     | -0.03   | 636.56   | 155 | 50   | DG 36:3; [M+NH4]+;<br>DG(14:1/22:2/0:0) |
| 636.5935 | 636     | -0.03   | 636.56   | 155 | 50   | DG 36:3; [M+NH4]+;<br>DG(14:1/22:2/0:0) |
| 636.5935 | 636     | -0.03   | 636.56   | 153 | 50   | DG 36:3; [M+NH4]+;<br>DG(14:1/22:2/0:0) |
| 97.0774  | 114.104 | 0.0238  | 97.1012  | 45  | 25.8 | Cyclohexanol, 1-Methyl-                 |
| 118.0873 | 117.079 | -0.001  | 118.0863 | 330 | 89.7 | Betaine                                 |
| 118.0873 | 117.079 | -0.001  | 118.0863 | 415 | 47   | Betaine                                 |
| 118.0873 | 117.079 | -0.001  | 118.0863 | 325 | 78.9 | Betaine                                 |
| 118.0873 | 117.079 | -0.001  | 118.0863 | 449 | 57.4 | Betaine                                 |
| 97.0774  | 114.104 | 0.0238  | 97.1012  | 33  | 26.6 | Cyclohexanemethanol                     |
| 106.0872 | 105     | 0       | 106.09   | 158 | 75.3 | Diethanolamine                          |
| 84.0822  | 102.092 | -0.0014 | 84.0808  | 258 | 51   | Betaine Aldehyde Cation                 |
| 84.0822  | 102.092 | -0.0014 | 84.0808  | 206 | 53.1 | Betaine Aldehyde Cation                 |
| 84.0822  | 102.092 | -0.0014 | 84.0808  | 182 | 56   | Betaine Aldehyde Cation                 |
| 118.0873 | 117.079 | -0.001  | 118.0863 | 298 | 40.2 | Betaine                                 |
| 118.0873 | 117.079 | -0.001  | 118.0863 | 281 | 58   | Betaine                                 |
| 118.0873 | 117.079 | -0.001  | 118.0863 | 355 | 40.5 | Betaine                                 |

|          |         |         |          |     |      |                                                      |
|----------|---------|---------|----------|-----|------|------------------------------------------------------|
| 106.0872 | 105     | 0       | 106.09   | 157 | 74.9 | Diethanolamine                                       |
| 106.0872 | 105     | 0       | 106.09   | 159 | 80.2 | Diethanolamine                                       |
| 106.0872 | 105.079 | -0.0009 | 106.0863 | 150 | 100  | Diethanolamine                                       |
| 666.6035 | 666     | 0       | 666.6    | 158 | 50   | DG 38:2; [M+NH4] <sup>+</sup> ;<br>DG(14:1/24:1/0:0) |
| 666.6035 | 666     | 0       | 666.6    | 151 | 50   | DG 38:2; [M+NH4] <sup>+</sup> ;<br>DG(14:1/24:1/0:0) |
| 186.0588 | 163.084 | 0.0149  | 186.0737 | 132 | 87.8 | N,N-Bis(2-Hydroxyethyl)Glycine                       |
| 186.0588 | 163.084 | 0.0149  | 186.0737 | 167 | 100  | N,N-Bis(2-Hydroxyethyl)Glycine                       |
| 106.0872 | 105     | 0       | 106.09   | 156 | 79.6 | Diethanolamine                                       |
| 106.0872 | 105     | 0       | 106.09   | 183 | 73.2 | Diethanolamine                                       |
| 84.0822  | 102.092 | -0.0014 | 84.0808  | 258 | 51   | Betaine Aldehyde Cation                              |
| 84.0822  | 102.092 | -0.0014 | 84.0808  | 256 | 52   | Betaine Aldehyde Cation                              |
| 84.0822  | 102.092 | -0.0014 | 84.0808  | 141 | 53.1 | Betaine Aldehyde Cation                              |
| 118.0873 | 117.079 | -0.001  | 118.0863 | 234 | 100  | Betaine                                              |
| 118.0873 | 117.079 | -0.001  | 118.0863 | 381 | 47.3 | Betaine                                              |
| 118.0873 | 117.079 | -0.001  | 118.0863 | 321 | 98.8 | Betaine                                              |
| 118.0873 | 117.079 | -0.001  | 118.0863 | 339 | 58.7 | Betaine                                              |
| 97.0774  | 114.104 | 0.0238  | 97.1012  | 39  | 24.1 | Cyclohexanol, 4-Methyl-, Trans-                      |
| 186.0588 | 370.196 | 0.0467  | 186.1055 | 62  | 100  | Ser-His-Lys                                          |
| 186.0588 | 370.196 | 0.0467  | 186.1055 | 44  | 100  | Ser-His-Lys                                          |
| 624.5931 | 624     | -0.03   | 624.56   | 160 | 50   | DG 35:2; [M+NH4] <sup>+</sup> ;<br>DG(15:1/20:1/0:0) |
| 118.0873 | 117.079 | -0.001  | 118.0863 | 378 | 45.4 | Betaine                                              |
| 118.0873 | 117.079 | -0.001  | 118.0863 | 296 | 65.5 | Betaine                                              |
| 118.0873 | 117.079 | -0.001  | 118.0863 | 332 | 41.1 | Betaine                                              |
| 106.0872 | 105     | 0       | 106.09   | 174 | 75   | Diethanolamine                                       |
| 106.0872 | 105     | 0       | 106.09   | 159 | 75.2 | Diethanolamine                                       |
| 118.0873 | 117.079 | -0.001  | 118.0863 | 333 | 64.5 | Betaine                                              |
| 118.0873 | 117.079 | -0.001  | 118.0863 | 381 | 26.9 | Betaine                                              |
| 118.0873 | 117.079 | -0.001  | 118.0863 | 283 | 62.8 | Betaine                                              |
| 118.0873 | 117.079 | -0.001  | 118.0863 | 330 | 45.2 | Betaine                                              |
| 106.0872 | 105     | 0       | 106.09   | 167 | 77.3 | Diethanolamine                                       |
| 106.0872 | 105     | 0       | 106.09   | 158 | 80.2 | Diethanolamine                                       |
| 84.0822  | 102.092 | -0.0014 | 84.0808  | 274 | 50   | Betaine Aldehyde Cation                              |
| 84.0822  | 102.092 | -0.0014 | 84.0808  | 216 | 52   | Betaine Aldehyde Cation                              |
| 84.0822  | 102.092 | -0.0014 | 84.0808  | 162 | 52   | Betaine Aldehyde Cation                              |
| 106.0872 | 105.079 | -0.0009 | 106.0863 | 113 | 100  | Diethanolamine                                       |
| 186.0588 | 370.196 | 0.0467  | 186.1055 | 46  | 100  | Ser-His-Lys                                          |
| 186.0588 | 370.196 | 0.0467  | 186.1055 | 60  | 61.5 | Ser-His-Lys                                          |
| 84.0822  | 102.092 | -0.0014 | 84.0808  | 257 | 52   | Betaine Aldehyde Cation                              |
| 84.0822  | 102.092 | -0.0014 | 84.0808  | 204 | 52   | Betaine Aldehyde Cation                              |

|          |         |         |          |     |      |                                         |
|----------|---------|---------|----------|-----|------|-----------------------------------------|
| 118.0873 | 117.079 | -0.001  | 118.0863 | 295 | 48.9 | Betaine                                 |
| 118.0873 | 117.079 | -0.001  | 118.0863 | 417 | 63.4 | Betaine                                 |
| 118.0873 | 117.079 | -0.001  | 118.0863 | 254 | 100  | Betaine                                 |
| 118.0873 | 117.079 | -0.001  | 118.0863 | 325 | 37.9 | Betaine                                 |
| 84.0822  | 102.092 | -0.0014 | 84.0808  | 223 | 50   | Betaine Aldehyde Cation                 |
| 84.0822  | 102.092 | -0.0014 | 84.0808  | 201 | 51   | Betaine Aldehyde Cation                 |
| 186.0588 | 203.091 | 0.0285  | 186.0873 | 62  | 100  | Ala-Asn                                 |
| 186.0588 | 163.084 | 0.0149  | 186.0737 | 139 | 100  | N,N-Bis(2-Hydroxyethyl)Glycine          |
| 186.0588 | 163.084 | 0.0149  | 186.0737 | 137 | 88.8 | N,N-Bis(2-Hydroxyethyl)Glycine          |
| 118.0873 | 117.079 | -0.001  | 118.0863 | 383 | 35.5 | Betaine                                 |
| 118.0873 | 117.079 | -0.001  | 118.0863 | 251 | 56.8 | Betaine                                 |
| 118.0873 | 117.079 | -0.001  | 118.0863 | 279 | 61.9 | Betaine                                 |
| 97.0774  | 114.104 | 0.0238  | 97.1012  | 36  | 24.5 | Cyclohexanol, 1-Methyl-                 |
| 638.6087 | 638     | -0.04   | 638.57   | 141 | 29.6 | DG 36:2; [M+NH4]+;<br>DG(14:1/22:1/0:0) |
| 638.6087 | 638     | -0.04   | 638.57   | 129 | 31.7 | DG 36:2; [M+NH4]+;<br>DG(16:1/20:1/0:0) |
| 638.6087 | 638     | -0.04   | 638.57   | 140 | 28   | DG 36:2; [M+NH4]+;<br>DG(16:1/20:1/0:0) |
| 638.6087 | 638     | -0.04   | 638.57   | 128 | 28   | DG 36:2; [M+NH4]+;<br>DG(14:1/22:1/0:0) |
| 638.6087 | 638     | -0.04   | 638.57   | 160 | 50   | DG 36:2; [M+NH4]+;<br>DG(14:1/22:1/0:0) |
| 638.6087 | 638     | -0.04   | 638.57   | 151 | 25.5 | DG 36:2; [M+NH4]+;<br>DG(16:1/20:1/0:0) |
| 638.6087 | 638     | -0.04   | 638.57   | 147 | 29.3 | DG 36:2; [M+NH4]+;<br>DG(16:1/20:1/0:0) |
| 638.6087 | 638     | -0.04   | 638.57   | 139 | 26   | DG 36:2; [M+NH4]+;<br>DG(16:1/20:1/0:0) |
| 668.6187 | 668     | 0       | 668.62   | 152 | 31.7 | DG 38:1; [M+NH4]+;<br>DG(14:1/24:0/0:0) |
| 668.6187 | 668     | 0       | 668.62   | 141 | 32.3 | DG 38:1; [M+NH4]+;<br>DG(16:1/22:0/0:0) |
| 118.0873 | 117.079 | -0.001  | 118.0863 | 308 | 70.7 | Betaine                                 |
| 118.0873 | 117.079 | -0.001  | 118.0863 | 316 | 61.7 | Betaine                                 |
| 118.0873 | 117.079 | -0.001  | 118.0863 | 329 | 78   | Betaine                                 |
| 118.0873 | 117.079 | -0.001  | 118.0863 | 327 | 63.5 | Betaine                                 |
| 97.0774  | 114.104 | 0.0238  | 97.1012  | 27  | 23.1 | Cyclohexanol, 1-Methyl-                 |
| 106.0872 | 105     | 0       | 106.09   | 156 | 80.7 | Diethanolamine                          |
| 106.0872 | 105     | 0       | 106.09   | 168 | 75.8 | Diethanolamine                          |
| 106.0872 | 105.079 | -0.0009 | 106.0863 | 117 | 100  | Diethanolamine                          |
| 638.6087 | 638     | -0.04   | 638.57   | 157 | 38.5 | DG 36:2; [M+NH4]+;<br>DG(14:1/22:1/0:0) |
| 638.6087 | 638     | -0.04   | 638.57   | 157 | 26   | DG 36:2; [M+NH4]+;<br>DG(16:1/20:1/0:0) |

|          |         |         |          |     |      |                                                      |
|----------|---------|---------|----------|-----|------|------------------------------------------------------|
| 668.6187 | 668     | 0       | 668.62   | 151 | 31.7 | DG 38:1; [M+NH4] <sup>+</sup> ;<br>DG(14:1/24:0/0:0) |
| 668.6187 | 668     | 0       | 668.62   | 149 | 35.1 | DG 38:1; [M+NH4] <sup>+</sup> ;<br>DG(16:1/22:0/0:0) |
| 668.6187 | 668     | 0       | 668.62   | 137 | 39   | DG 38:1; [M+NH4] <sup>+</sup> ;<br>DG(14:1/24:0/0:0) |
| 664.6234 | 664     | -0.03   | 664.59   | 142 | 50   | DG 38:3; [M+NH4] <sup>+</sup> ;<br>DG(16:1/22:2/0:0) |
| 664.6234 | 664     | -0.03   | 664.59   | 157 | 50   | DG 38:3; [M+NH4] <sup>+</sup> ;<br>DG(16:1/22:2/0:0) |
| 664.6234 | 664     | -0.03   | 664.59   | 150 | 50   | DG 38:3; [M+NH4] <sup>+</sup> ;<br>DG(16:1/22:2/0:0) |
| 106.0872 | 105     | 0       | 106.09   | 169 | 80.9 | Diethanolamine                                       |
| 106.0872 | 105.079 | -0.0009 | 106.0863 | 125 | 100  | Diethanolamine                                       |
| 84.0822  | 102.092 | -0.0014 | 84.0808  | 236 | 53.1 | Betaine Aldehyde Cation                              |
| 84.0822  | 102.092 | -0.0014 | 84.0808  | 223 | 51   | Betaine Aldehyde Cation                              |
| 84.0822  | 102.092 | -0.0014 | 84.0808  | 117 | 54.2 | Betaine Aldehyde Cation                              |
| 186.0588 | 163.084 | 0.0149  | 186.0737 | 181 | 88.4 | N,N-Bis(2-Hydroxyethyl)Glycine                       |
| 664.6234 | 664     | -0.03   | 664.59   | 157 | 50   | DG 38:3; [M+NH4] <sup>+</sup> ;<br>DG(16:1/22:2/0:0) |
| 664.6234 | 664     | -0.03   | 664.59   | 158 | 50   | DG 38:3; [M+NH4] <sup>+</sup> ;<br>DG(16:1/22:2/0:0) |
| 118.0873 | 117.079 | -0.001  | 118.0863 | 298 | 82.7 | Betaine                                              |
| 118.0873 | 117.079 | -0.001  | 118.0863 | 449 | 99   | Betaine                                              |
| 118.0873 | 117.079 | -0.001  | 118.0863 | 313 | 71.5 | Betaine                                              |
| 118.0873 | 117.079 | -0.001  | 118.0863 | 378 | 47.3 | Betaine                                              |
| 668.6187 | 668     | 0       | 668.62   | 215 | 50   | DG 38:1; [M+NH4] <sup>+</sup> ;<br>DG(16:1/22:0/0:0) |
| 106.0872 | 105     | 0       | 106.09   | 190 | 77.1 | Diethanolamine                                       |
| 106.0872 | 105.079 | -0.0009 | 106.0863 | 118 | 100  | Diethanolamine                                       |
| 106.0872 | 105.079 | -0.0009 | 106.0863 | 175 | 100  | Diethanolamine                                       |
| 118.0873 | 117.079 | -0.001  | 118.0863 | 384 | 47.4 | Betaine                                              |
| 118.0873 | 117.079 | -0.001  | 118.0863 | 293 | 70.9 | Betaine                                              |
| 118.0873 | 117.079 | -0.001  | 118.0863 | 346 | 60.1 | Betaine                                              |
| 97.0774  | 114.104 | 0.0238  | 97.1012  | 26  | 25.6 | Cyclohexanemethanol                                  |
| 664.6234 | 664     | -0.03   | 664.59   | 151 | 50   | DG 38:3; [M+NH4] <sup>+</sup> ;<br>DG(16:1/22:2/0:0) |
| 664.6234 | 664     | -0.03   | 664.59   | 160 | 50   | DG 38:3; [M+NH4] <sup>+</sup> ;<br>DG(16:1/22:2/0:0) |
| 664.6234 | 664     | -0.03   | 664.59   | 153 | 50   | DG 38:3; [M+NH4] <sup>+</sup> ;<br>DG(16:1/22:2/0:0) |
| 84.0822  | 102.092 | -0.0014 | 84.0808  | 242 | 51   | Betaine Aldehyde Cation                              |
| 84.0822  | 102.092 | -0.0014 | 84.0808  | 163 | 50   | Betaine Aldehyde Cation                              |
| 186.0588 | 370.196 | 0.0467  | 186.1055 | 53  | 100  | Ser-His-Lys                                          |
| 186.0588 | 163.084 | 0.0149  | 186.0737 | 140 | 100  | N,N-Bis(2-Hydroxyethyl)Glycine                       |

|          |         |         |          |     |      |                                                      |
|----------|---------|---------|----------|-----|------|------------------------------------------------------|
| 118.0873 | 117.079 | -0.001  | 118.0863 | 287 | 42.6 | Betaine                                              |
| 118.0873 | 117.079 | -0.001  | 118.0863 | 318 | 96.9 | Betaine                                              |
| 118.0873 | 117.079 | -0.001  | 118.0863 | 323 | 75.6 | Betaine                                              |
| 97.0774  | 114.104 | 0.0238  | 97.1012  | 37  | 22.4 | Cyclohexanemethanol                                  |
| 694.6329 | 694     | 0       | 694.63   | 160 | 50   | DG 40:2; [M+NH4] <sup>+</sup> ;<br>DG(16:1/24:1/0:0) |
| 694.6329 | 694     | 0       | 694.63   | 160 | 50   | DG 40:2; [M+NH4] <sup>+</sup> ;<br>DG(16:1/24:1/0:0) |
| 694.6329 | 694     | 0       | 694.63   | 159 | 50   | DG 40:2; [M+NH4] <sup>+</sup> ;<br>DG(16:1/24:1/0:0) |
| 118.0873 | 117.079 | -0.001  | 118.0863 | 319 | 42.8 | Betaine                                              |
| 118.0873 | 117.079 | -0.001  | 118.0863 | 331 | 93.5 | Betaine                                              |
| 118.0873 | 117.079 | -0.001  | 118.0863 | 300 | 68   | Betaine                                              |
| 84.0822  | 102.092 | -0.0014 | 84.0808  | 259 | 51   | Betaine Aldehyde Cation                              |
| 84.0822  | 102.092 | -0.0014 | 84.0808  | 185 | 51   | Betaine Aldehyde Cation                              |
| 84.0822  | 102.092 | -0.0014 | 84.0808  | 146 | 51   | Betaine Aldehyde Cation                              |
| 118.0873 | 117.079 | -0.001  | 118.0863 | 330 | 40.2 | Betaine                                              |
| 118.0873 | 117.079 | -0.001  | 118.0863 | 291 | 64.3 | Betaine                                              |
| 118.0873 | 117.079 | -0.001  | 118.0863 | 342 | 33.8 | Betaine                                              |
| 186.0588 | 163.084 | 0.0149  | 186.0737 | 154 | 100  | N,N-Bis(2-Hydroxyethyl)Glycine                       |
| 118.0873 | 117.079 | -0.001  | 118.0863 | 287 | 100  | Betaine                                              |
| 118.0873 | 117.079 | -0.001  | 118.0863 | 349 | 56.4 | Betaine                                              |
| 118.0873 | 117.079 | -0.001  | 118.0863 | 295 | 32.7 | Betaine                                              |
| 118.0873 | 117.079 | -0.001  | 118.0863 | 347 | 55   | Betaine                                              |
| 106.0872 | 105     | 0       | 106.09   | 175 | 70.4 | Diethanolamine                                       |
| 106.0872 | 105     | 0       | 106.09   | 154 | 73.7 | Diethanolamine                                       |
| 84.0822  | 102.092 | -0.0014 | 84.0808  | 239 | 53.1 | Betaine Aldehyde Cation                              |
| 84.0822  | 102.092 | -0.0014 | 84.0808  | 178 | 50   | Betaine Aldehyde Cation                              |
| 84.0822  | 102.092 | -0.0014 | 84.0808  | 171 | 51   | Betaine Aldehyde Cation                              |
| 84.0822  | 102.092 | -0.0014 | 84.0808  | 144 | 51   | Betaine Aldehyde Cation                              |
| 84.0822  | 102.092 | -0.0014 | 84.0808  | 116 | 50   | Betaine Aldehyde Cation                              |
| 148.0974 | 147     | -0.04   | 148.06   | 57  | 52   | O-Acetyl-L-Serine Hydrochloride                      |
| 118.0873 | 117.079 | -0.001  | 118.0863 | 318 | 30.8 | Betaine                                              |
| 118.0873 | 117.079 | -0.001  | 118.0863 | 321 | 32.8 | Betaine                                              |
| 118.0873 | 117.079 | -0.001  | 118.0863 | 308 | 60.2 | Betaine                                              |
| 106.0872 | 105     | 0       | 106.09   | 172 | 69.5 | Diethanolamine                                       |
| 106.0872 | 105.079 | -0.0009 | 106.0863 | 138 | 100  | Diethanolamine                                       |
| 84.0822  | 102.092 | -0.0014 | 84.0808  | 279 | 51   | Betaine Aldehyde Cation                              |
| 84.0822  | 102.092 | -0.0014 | 84.0808  | 210 | 53.1 | Betaine Aldehyde Cation                              |
| 84.0822  | 102.092 | -0.0014 | 84.0808  | 127 | 53.1 | Betaine Aldehyde Cation                              |
| 186.0588 | 163.084 | 0.0149  | 186.0737 | 79  | 73.2 | N,N-Bis(2-Hydroxyethyl)Glycine                       |
| 186.0588 | 163.084 | 0.0149  | 186.0737 | 129 | 92.4 | N,N-Bis(2-Hydroxyethyl)Glycine                       |



|          |         |         |          |     |      |                                                      |
|----------|---------|---------|----------|-----|------|------------------------------------------------------|
| 666.6406 | 666     | -0.04   | 666.6    | 160 | 50   | DG 38:2; [M+NH4] <sup>+</sup> ;<br>DG(16:1/22:1/0:0) |
| 666.6406 | 666     | -0.04   | 666.6    | 108 | 50   | DG 38:2; [M+NH4] <sup>+</sup> ;<br>DG(16:1/22:1/0:0) |
| 666.6406 | 666     | -0.04   | 666.6    | 60  | 50   | DG 38:2; [M+NH4] <sup>+</sup> ;<br>DG(16:1/22:1/0:0) |
| 666.6406 | 666     | -0.04   | 666.6    | 54  | 50   | DG 38:2; [M+NH4] <sup>+</sup> ;<br>DG(16:1/22:1/0:0) |
| 118.0873 | 117.079 | -0.001  | 118.0863 | 256 | 75.4 | Betaine                                              |
| 118.0873 | 117.079 | -0.001  | 118.0863 | 433 | 43   | Betaine                                              |
| 118.0873 | 117.079 | -0.001  | 118.0863 | 290 | 63.6 | Betaine                                              |
| 118.0873 | 117.079 | -0.001  | 118.0863 | 399 | 54.5 | Betaine                                              |
| 97.0774  | 114.104 | 0.0238  | 97.1012  | 34  | 27.9 | Cyclohexanol, 4-Methyl-, Trans-                      |
| 696.651  | 696     | 0       | 696.65   | 197 | 50   | DG 40:1; [M+NH4] <sup>+</sup> ;<br>DG(16:1/24:0/0:0) |
| 696.651  | 696     | 0       | 696.65   | 122 | 50   | DG 40:1; [M+NH4] <sup>+</sup> ;<br>DG(16:1/24:0/0:0) |
| 696.651  | 696     | 0       | 696.65   | 56  | 50   | DG 40:1; [M+NH4] <sup>+</sup> ;<br>DG(16:1/24:0/0:0) |
| 696.651  | 696     | 0       | 696.65   | 68  | 50   | DG 40:1; [M+NH4] <sup>+</sup> ;<br>DG(16:1/24:0/0:0) |
| 106.0872 | 105     | 0       | 106.09   | 154 | 83.5 | Diethanolamine                                       |
| 666.6406 | 666     | -0.04   | 666.6    | 156 | 50   | DG 38:2; [M+NH4] <sup>+</sup> ;<br>DG(16:1/22:1/0:0) |
| 666.6406 | 666     | -0.04   | 666.6    | 112 | 50   | DG 38:2; [M+NH4] <sup>+</sup> ;<br>DG(16:1/22:1/0:0) |
| 666.6406 | 666     | -0.04   | 666.6    | 111 | 50   | DG 38:2; [M+NH4] <sup>+</sup> ;<br>DG(16:1/22:1/0:0) |
| 696.651  | 696     | 0       | 696.65   | 159 | 50   | DG 40:1; [M+NH4] <sup>+</sup> ;<br>DG(16:1/24:0/0:0) |
| 696.651  | 696     | 0       | 696.65   | 127 | 50   | DG 40:1; [M+NH4] <sup>+</sup> ;<br>DG(16:1/24:0/0:0) |
| 696.651  | 696     | 0       | 696.65   | 89  | 50   | DG 40:1; [M+NH4] <sup>+</sup> ;<br>DG(16:1/24:0/0:0) |
| 696.651  | 696     | 0       | 696.65   | 71  | 50   | DG 40:1; [M+NH4] <sup>+</sup> ;<br>DG(16:1/24:0/0:0) |
| 118.0873 | 117.079 | -0.001  | 118.0863 | 286 | 69.9 | Betaine                                              |
| 118.0873 | 117.079 | -0.001  | 118.0863 | 389 | 35.9 | Betaine                                              |
| 118.0873 | 117.079 | -0.001  | 118.0863 | 307 | 71.1 | Betaine                                              |
| 118.0873 | 117     | 0       | 118.09   | 358 | 26.9 | Betaine                                              |
| 97.0774  | 114.104 | 0.0238  | 97.1012  | 48  | 25.2 | Cyclohexanemethanol                                  |
| 106.0872 | 105     | 0       | 106.09   | 228 | 77.9 | Diethanolamine                                       |
| 106.0872 | 105.079 | -0.0009 | 106.0863 | 114 | 100  | Diethanolamine                                       |
| 696.651  | 696     | 0       | 696.65   | 159 | 50   | DG 40:1; [M+NH4] <sup>+</sup> ;<br>DG(16:1/24:0/0:0) |
| 696.651  | 696     | 0       | 696.65   | 159 | 50   | DG 40:1; [M+NH4] <sup>+</sup> ;<br>DG(16:1/24:0/0:0) |

|          |         |         |          |     |      |                                                      |
|----------|---------|---------|----------|-----|------|------------------------------------------------------|
| 666.6406 | 666     | -0.04   | 666.6    | 160 | 50   | DG 38:2; [M+NH4] <sup>+</sup> ;<br>DG(16:1/22:1/0:0) |
| 84.0822  | 102.092 | -0.0014 | 84.0808  | 263 | 50   | Betaine Aldehyde Cation                              |
| 84.0822  | 102.092 | -0.0014 | 84.0808  | 228 | 51   | Betaine Aldehyde Cation                              |
| 84.0822  | 102.092 | -0.0014 | 84.0808  | 138 | 53.1 | Betaine Aldehyde Cation                              |
| 186.0588 | 163.084 | 0.0149  | 186.0737 | 157 | 93.2 | N,N-Bis(2-Hydroxyethyl)Glycine                       |
| 186.0588 | 163.084 | 0.0149  | 186.0737 | 135 | 83.6 | N,N-Bis(2-Hydroxyethyl)Glycine                       |
| 118.0873 | 117.079 | -0.001  | 118.0863 | 324 | 100  | Betaine                                              |
| 118.0873 | 117     | 0       | 118.09   | 367 | 25.1 | Betaine                                              |
| 118.0873 | 117.079 | -0.001  | 118.0863 | 268 | 95.4 | Betaine                                              |
| 118.0873 | 117.079 | -0.001  | 118.0863 | 326 | 42.2 | Betaine                                              |
| 97.0774  | 114.104 | 0.0238  | 97.1012  | 51  | 24.3 | Cyclohexanol, 1-Methyl-                              |
| 97.0774  | 114.104 | 0.0238  | 97.1012  | 37  | 24   | Cyclohexanemethanol                                  |
| 106.0872 | 105     | 0       | 106.09   | 216 | 78.2 | Diethanolamine                                       |
| 106.0872 | 105     | 0       | 106.09   | 159 | 79.3 | Diethanolamine                                       |
| 118.0873 | 117.079 | -0.001  | 118.0863 | 313 | 100  | Betaine                                              |
| 118.0873 | 117.079 | -0.001  | 118.0863 | 309 | 68.5 | Betaine                                              |
| 118.0873 | 117.079 | -0.001  | 118.0863 | 319 | 27.9 | Betaine                                              |
| 97.0774  | 114.104 | 0.0238  | 97.1012  | 16  | 100  | Cyclopentanemethanol, .Alpha.-<br>Methyl-            |
| 97.0774  | 114.104 | 0.0238  | 97.1012  | 26  | 32.8 | Cyclohexanemethanol                                  |
| 106.0872 | 105     | 0       | 106.09   | 152 | 80.4 | Diethanolamine                                       |
| 106.0872 | 105.079 | -0.0009 | 106.0863 | 118 | 100  | Diethanolamine                                       |
| 84.0822  | 102.092 | -0.0014 | 84.0808  | 303 | 52   | Betaine Aldehyde Cation                              |
| 84.0822  | 102.092 | -0.0014 | 84.0808  | 241 | 50   | Betaine Aldehyde Cation                              |
| 118.0873 | 117.079 | -0.001  | 118.0863 | 307 | 59.5 | Betaine                                              |
| 118.0873 | 117.079 | -0.001  | 118.0863 | 306 | 68.6 | Betaine                                              |
| 118.0873 | 117.079 | -0.001  | 118.0863 | 353 | 43.5 | Betaine                                              |
| 97.0774  | 114.104 | 0.0238  | 97.1012  | 44  | 23.5 | Cyclohexanemethanol                                  |
| 106.0872 | 105     | 0       | 106.09   | 147 | 77.9 | Diethanolamine                                       |
| 84.0822  | 102.092 | -0.0014 | 84.0808  | 251 | 52   | Betaine Aldehyde Cation                              |
| 84.0822  | 102.092 | -0.0014 | 84.0808  | 231 | 50   | Betaine Aldehyde Cation                              |
| 84.0822  | 102.092 | -0.0014 | 84.0808  | 137 | 53.1 | Betaine Aldehyde Cation                              |
| 186.0588 | 370.196 | 0.0467  | 186.1055 | 47  | 100  | Ser-His-Lys                                          |
| 186.0588 | 163.084 | 0.0149  | 186.0737 | 162 | 100  | N,N-Bis(2-Hydroxyethyl)Glycine                       |
| 118.0873 | 117.079 | -0.001  | 118.0863 | 410 | 36.6 | Betaine                                              |
| 118.0873 | 117.079 | -0.001  | 118.0863 | 297 | 67   | Betaine                                              |
| 118.0873 | 117.079 | -0.001  | 118.0863 | 322 | 53.6 | Betaine                                              |
| 97.0774  | 114.104 | 0.0238  | 97.1012  | 24  | 24.4 | Cyclohexanemethanol                                  |
| 106.0872 | 105     | 0       | 106.09   | 159 | 75.9 | Diethanolamine                                       |
| 106.0872 | 105.079 | -0.0009 | 106.0863 | 191 | 100  | Diethanolamine                                       |
| 84.0822  | 102.092 | -0.0014 | 84.0808  | 260 | 51   | Betaine Aldehyde Cation                              |

|          |         |         |          |     |      |                                 |
|----------|---------|---------|----------|-----|------|---------------------------------|
| 84.0822  | 102.092 | -0.0014 | 84.0808  | 198 | 50   | Betaine Aldehyde Cation         |
| 84.0822  | 102.092 | -0.0014 | 84.0808  | 151 | 53.1 | Betaine Aldehyde Cation         |
| 186.0588 | 163.084 | 0.0149  | 186.0737 | 157 | 100  | N,N-Bis(2-Hydroxyethyl)Glycine  |
| 186.0588 | 163.084 | 0.0149  | 186.0737 | 141 | 100  | N,N-Bis(2-Hydroxyethyl)Glycine  |
| 186.0588 | 163.084 | 0.0149  | 186.0737 | 151 | 100  | N,N-Bis(2-Hydroxyethyl)Glycine  |
| 118.0873 | 117.079 | -0.001  | 118.0863 | 360 | 25   | Betaine                         |
| 118.0873 | 117.079 | -0.001  | 118.0863 | 302 | 67.7 | Betaine                         |
| 118.0873 | 117.079 | -0.001  | 118.0863 | 289 | 64.6 | Betaine                         |
| 97.0774  | 114.104 | 0.0238  | 97.1012  | 29  | 20.9 | Cyclohexanol, 1-Methyl-         |
| 106.0872 | 105     | 0       | 106.09   | 148 | 80.2 | Diethanolamine                  |
| 186.0588 | 163.084 | 0.0149  | 186.0737 | 135 | 100  | N,N-Bis(2-Hydroxyethyl)Glycine  |
| 118.0873 | 117.079 | -0.001  | 118.0863 | 333 | 55   | Betaine                         |
| 118.0873 | 117.079 | -0.001  | 118.0863 | 278 | 63   | Betaine                         |
| 118.0873 | 117.079 | -0.001  | 118.0863 | 334 | 48.2 | Betaine                         |
| 97.0774  | 114.104 | 0.0238  | 97.1012  | 37  | 23.9 | Cyclohexanemethanol             |
| 106.0872 | 105     | 0       | 106.09   | 196 | 69.9 | Diethanolamine                  |
| 106.0872 | 105     | 0       | 106.09   | 159 | 75.9 | Diethanolamine                  |
| 84.0822  | 102.092 | -0.0014 | 84.0808  | 271 | 50   | Betaine Aldehyde Cation         |
| 84.0822  | 102.092 | -0.0014 | 84.0808  | 233 | 51   | Betaine Aldehyde Cation         |
| 84.0822  | 102.092 | -0.0014 | 84.0808  | 117 | 54.2 | Betaine Aldehyde Cation         |
| 84.0822  | 102.092 | -0.0014 | 84.0808  | 220 | 52   | Betaine Aldehyde Cation         |
| 84.0822  | 102.092 | -0.0014 | 84.0808  | 180 | 51   | Betaine Aldehyde Cation         |
| 84.0822  | 102.092 | -0.0014 | 84.0808  | 140 | 54.2 | Betaine Aldehyde Cation         |
| 148.0974 | 147     | -0.04   | 148.06   | 57  | 62.3 | O-Acetyl-L-Serine Hydrochloride |
| 148.0974 | 147.053 | -0.037  | 148.0604 | 115 | 100  | O-Acetyl-L-Serine               |
| 148.0974 | 147.053 | -0.037  | 148.0604 | 162 | 71.2 | O-Acetyl-L-Serine               |
| 118.0873 | 117.079 | -0.001  | 118.0863 | 344 | 49.3 | Betaine                         |
| 118.0873 | 117.079 | -0.001  | 118.0863 | 338 | 96.4 | Betaine                         |
| 118.0873 | 117.079 | -0.001  | 118.0863 | 349 | 35.7 | Betaine                         |
| 97.0774  | 114.104 | 0.0238  | 97.1012  | 25  | 33.9 | Cyclohexanol, 1-Methyl-         |
| 106.0872 | 105     | 0       | 106.09   | 154 | 80.7 | Diethanolamine                  |
| 106.0872 | 105     | 0       | 106.09   | 155 | 78   | Diethanolamine                  |
| 186.0588 | 163.084 | 0.0149  | 186.0737 | 143 | 100  | N,N-Bis(2-Hydroxyethyl)Glycine  |
| 186.0588 | 370.196 | 0.0467  | 186.1055 | 58  | 100  | Ser-His-Lys                     |
| 84.0822  | 102.092 | -0.0014 | 84.0808  | 291 | 53.1 | Betaine Aldehyde Cation         |
| 84.0822  | 102.092 | -0.0014 | 84.0808  | 260 | 53.1 | Betaine Aldehyde Cation         |
| 84.0822  | 102.092 | -0.0014 | 84.0808  | 185 | 53.1 | Betaine Aldehyde Cation         |
| 118.0873 | 117.079 | -0.001  | 118.0863 | 344 | 48.3 | Betaine                         |
| 118.0873 | 117.079 | -0.001  | 118.0863 | 307 | 72   | Betaine                         |
| 118.0873 | 117.079 | -0.001  | 118.0863 | 338 | 69.2 | Betaine                         |
| 106.0872 | 105     | 0       | 106.09   | 151 | 75.5 | Diethanolamine                  |

|          |         |         |          |     |      |                                 |
|----------|---------|---------|----------|-----|------|---------------------------------|
| 106.0872 | 105     | 0       | 106.09   | 145 | 70.2 | Diethanolamine                  |
| 84.0822  | 102.092 | -0.0014 | 84.0808  | 275 | 50   | Betaine Aldehyde Cation         |
| 84.0822  | 102.092 | -0.0014 | 84.0808  | 212 | 51   | Betaine Aldehyde Cation         |
| 84.0822  | 102.092 | -0.0014 | 84.0808  | 156 | 54.2 | Betaine Aldehyde Cation         |
| 84.0822  | 102.092 | -0.0014 | 84.0808  | 139 | 51   | Betaine Aldehyde Cation         |
| 186.0588 | 163.084 | 0.0149  | 186.0737 | 196 | 94.9 | N,N-Bis(2-Hydroxyethyl)Glycine  |
| 186.0588 | 163.084 | 0.0149  | 186.0737 | 116 | 100  | N,N-Bis(2-Hydroxyethyl)Glycine  |
| 118.0873 | 117.079 | -0.001  | 118.0863 | 323 | 34   | Betaine                         |
| 118.0873 | 117.079 | -0.001  | 118.0863 | 280 | 62.3 | Betaine                         |
| 118.0873 | 117.079 | -0.001  | 118.0863 | 367 | 35.9 | Betaine                         |
| 97.0774  | 114.104 | 0.0238  | 97.1012  | 30  | 24.4 | Cyclohexanol, 1-Methyl-         |
| 106.0872 | 105     | 0       | 106.09   | 153 | 75.2 | Diethanolamine                  |
| 84.0822  | 102.092 | -0.0014 | 84.0808  | 286 | 50   | Betaine Aldehyde Cation         |
| 84.0822  | 102.092 | -0.0014 | 84.0808  | 238 | 50   | Betaine Aldehyde Cation         |
| 84.0822  | 102.092 | -0.0014 | 84.0808  | 164 | 54.2 | Betaine Aldehyde Cation         |
| 118.0873 | 117.079 | -0.001  | 118.0863 | 293 | 32.4 | Betaine                         |
| 118.0873 | 117.079 | -0.001  | 118.0863 | 327 | 39.4 | Betaine                         |
| 118.0873 | 117.079 | -0.001  | 118.0863 | 362 | 44.4 | Betaine                         |
| 186.0588 | 203.091 | 0.0285  | 186.0873 | 65  | 71.9 | Ala-Asn                         |
| 186.0588 | 163.084 | 0.0149  | 186.0737 | 144 | 100  | N,N-Bis(2-Hydroxyethyl)Glycine  |
| 186.0588 | 370.196 | 0.0467  | 186.1055 | 65  | 100  | Ser-His-Lys                     |
| 118.0873 | 117.079 | -0.001  | 118.0863 | 343 | 53.4 | Betaine                         |
| 118.0873 | 117.079 | -0.001  | 118.0863 | 309 | 70.6 | Betaine                         |
| 118.0873 | 117.079 | -0.001  | 118.0863 | 299 | 66.6 | Betaine                         |
| 97.0774  | 114.104 | 0.0238  | 97.1012  | 30  | 24.2 | Cyclohexanol, 1-Methyl-         |
| 97.0774  | 114.104 | 0.0238  | 97.1012  | 46  | 23.4 | Cyclohexanol, 4-Methyl-, Trans- |
| 106.0872 | 105     | 0       | 106.09   | 165 | 71.4 | Diethanolamine                  |
| 106.0872 | 105     | 0       | 106.09   | 190 | 57.5 | Diethanolamine                  |
| 84.0822  | 102.092 | -0.0014 | 84.0808  | 250 | 54.2 | Betaine Aldehyde Cation         |
| 84.0822  | 102.092 | -0.0014 | 84.0808  | 231 | 53.1 | Betaine Aldehyde Cation         |
| 84.0822  | 102.092 | -0.0014 | 84.0808  | 104 | 51   | Betaine Aldehyde Cation         |
| 186.0588 | 203.091 | 0.0285  | 186.0873 | 36  | 100  | Ala-Asn                         |
| 118.0873 | 117.079 | -0.001  | 118.0863 | 372 | 44.3 | Betaine                         |
| 118.0873 | 117.079 | -0.001  | 118.0863 | 267 | 58.4 | Betaine                         |
| 118.0873 | 117.079 | -0.001  | 118.0863 | 260 | 92.5 | Betaine                         |
| 106.0872 | 105     | 0       | 106.09   | 157 | 73.2 | Diethanolamine                  |
| 106.0872 | 105     | 0       | 106.09   | 155 | 79.3 | Diethanolamine                  |
| 84.0822  | 102.092 | -0.0014 | 84.0808  | 262 | 52   | Betaine Aldehyde Cation         |
| 84.0822  | 102.092 | -0.0014 | 84.0808  | 233 | 52   | Betaine Aldehyde Cation         |
| 84.0822  | 102.092 | -0.0014 | 84.0808  | 188 | 52   | Betaine Aldehyde Cation         |
| 186.0588 | 163.084 | 0.0149  | 186.0737 | 139 | 77.2 | N,N-Bis(2-Hydroxyethyl)Glycine  |

|          |         |         |          |     |      |                                 |
|----------|---------|---------|----------|-----|------|---------------------------------|
| 186.0588 | 163.084 | 0.0149  | 186.0737 | 137 | 86.6 | N,N-Bis(2-Hydroxyethyl)Glycine  |
| 186.0588 | 163.084 | 0.0149  | 186.0737 | 151 | 92.7 | N,N-Bis(2-Hydroxyethyl)Glycine  |
| 118.0873 | 117.079 | -0.001  | 118.0863 | 345 | 31.4 | Betaine                         |
| 118.0873 | 117.079 | -0.001  | 118.0863 | 309 | 98.8 | Betaine                         |
| 118.0873 | 117.079 | -0.001  | 118.0863 | 351 | 98.7 | Betaine                         |
| 97.0774  | 114.104 | 0.0238  | 97.1012  | 16  | 39.8 | Cyclohexanol, 4-Methyl-, Trans- |
| 106.0872 | 105     | 0       | 106.09   | 154 | 77.7 | Diethanolamine                  |
| 106.0872 | 105     | 0       | 106.09   | 220 | 72.3 | Diethanolamine                  |
| 84.0822  | 102.092 | -0.0014 | 84.0808  | 249 | 50   | Betaine Aldehyde Cation         |
| 84.0822  | 102.092 | -0.0014 | 84.0808  | 262 | 50   | Betaine Aldehyde Cation         |
| 84.0822  | 102.092 | -0.0014 | 84.0808  | 174 | 51   | Betaine Aldehyde Cation         |
| 97.0774  | 114.104 | 0.0238  | 97.1012  | 29  | 22.4 | Cyclohexanol, 1-Methyl-         |
| 106.0872 | 105     | 0       | 106.09   | 157 | 75   | Diethanolamine                  |
| 84.0822  | 102.092 | -0.0014 | 84.0808  | 267 | 51   | Betaine Aldehyde Cation         |
| 84.0822  | 102.092 | -0.0014 | 84.0808  | 233 | 53.1 | Betaine Aldehyde Cation         |
| 84.0822  | 102.092 | -0.0014 | 84.0808  | 137 | 50   | Betaine Aldehyde Cation         |
| 84.0822  | 102.092 | -0.0014 | 84.0808  | 155 | 54.2 | Betaine Aldehyde Cation         |
| 186.0588 | 163.084 | 0.0149  | 186.0737 | 170 | 100  | N,N-Bis(2-Hydroxyethyl)Glycine  |
| 186.0588 | 163.084 | 0.0149  | 186.0737 | 155 | 100  | N,N-Bis(2-Hydroxyethyl)Glycine  |
| 186.0588 | 370.196 | 0.0467  | 186.1055 | 59  | 100  | Ser-His-Lys                     |
| 118.0873 | 117.079 | -0.001  | 118.0863 | 331 | 96.2 | Betaine                         |
| 118.0873 | 117.079 | -0.001  | 118.0863 | 290 | 65.8 | Betaine                         |
| 118.0873 | 117.079 | -0.001  | 118.0863 | 352 | 54   | Betaine                         |
| 97.0774  | 114.104 | 0.0238  | 97.1012  | 82  | 19.4 | Cyclohexanol, 2-Methyl-, Trans- |
| 106.0872 | 105     | 0       | 106.09   | 159 | 77.1 | Diethanolamine                  |
| 106.0872 | 105     | 0       | 106.09   | 154 | 80.2 | Diethanolamine                  |
| 106.0872 | 105     | 0       | 106.09   | 159 | 76.1 | Diethanolamine                  |
| 84.0822  | 102.092 | -0.0014 | 84.0808  | 298 | 56.6 | Betaine Aldehyde Cation         |
| 84.0822  | 102.092 | -0.0014 | 84.0808  | 245 | 52   | Betaine Aldehyde Cation         |
| 84.0822  | 102.092 | -0.0014 | 84.0808  | 236 | 52   | Betaine Aldehyde Cation         |
| 118.0873 | 117.079 | -0.001  | 118.0863 | 383 | 45.4 | Betaine                         |
| 118.0873 | 117.079 | -0.001  | 118.0863 | 335 | 58.5 | Betaine                         |
| 118.0873 | 117.079 | -0.001  | 118.0863 | 354 | 35.4 | Betaine                         |
| 97.0774  | 114.104 | 0.0238  | 97.1012  | 30  | 23.8 | Cyclohexanol, 1-Methyl-         |
| 106.0872 | 105     | 0       | 106.09   | 156 | 79.6 | Diethanolamine                  |
| 106.0872 | 105     | 0       | 106.09   | 159 | 75   | Diethanolamine                  |
| 106.0872 | 105     | 0       | 106.09   | 155 | 79.6 | Diethanolamine                  |
| 84.0822  | 102.092 | -0.0014 | 84.0808  | 275 | 53.1 | Betaine Aldehyde Cation         |
| 84.0822  | 102.092 | -0.0014 | 84.0808  | 253 | 50   | Betaine Aldehyde Cation         |
| 84.0822  | 102.092 | -0.0014 | 84.0808  | 143 | 51   | Betaine Aldehyde Cation         |
| 186.0588 | 163.084 | 0.0149  | 186.0737 | 117 | 100  | N,N-Bis(2-Hydroxyethyl)Glycine  |

|          |         |         |          |     |      |                                |
|----------|---------|---------|----------|-----|------|--------------------------------|
| 186.0588 | 163.084 | 0.0149  | 186.0737 | 148 | 100  | N,N-Bis(2-Hydroxyethyl)Glycine |
| 186.0588 | 163.084 | 0.0149  | 186.0737 | 151 | 100  | N,N-Bis(2-Hydroxyethyl)Glycine |
| 118.0873 | 117.079 | -0.001  | 118.0863 | 317 | 32.4 | Betaine                        |
| 118.0873 | 117.079 | -0.001  | 118.0863 | 282 | 61.1 | Betaine                        |
| 118.0873 | 117.079 | -0.001  | 118.0863 | 344 | 59.6 | Betaine                        |
| 106.0872 | 105     | 0       | 106.09   | 158 | 78.6 | Diethanolamine                 |
| 106.0872 | 105     | 0       | 106.09   | 157 | 75.2 | Diethanolamine                 |
| 106.0872 | 105.079 | -0.0009 | 106.0863 | 115 | 100  | Diethanolamine                 |
| 84.0822  | 102.092 | -0.0014 | 84.0808  | 281 | 54.2 | Betaine Aldehyde Cation        |
| 84.0822  | 102.092 | -0.0014 | 84.0808  | 211 | 50   | Betaine Aldehyde Cation        |
| 84.0822  | 102.092 | -0.0014 | 84.0808  | 145 | 51   | Betaine Aldehyde Cation        |
| 186.0588 | 370.196 | 0.0467  | 186.1055 | 43  | 100  | Ser-His-Lys                    |
| 186.0588 | 370.196 | 0.0467  | 186.1055 | 68  | 100  | Ser-His-Lys                    |
| 106.0872 | 105     | 0       | 106.09   | 159 | 79.6 | Diethanolamine                 |
| 106.0872 | 105     | 0       | 106.09   | 135 | 76.6 | Diethanolamine                 |
| 148.0974 | 147.053 | -0.037  | 148.0604 | 93  | 56.5 | O-Acetyl-L-Serine              |
| 148.0974 | 147.053 | -0.037  | 148.0604 | 141 | 100  | O-Acetyl-L-Serine              |
| 118.0873 | 117.079 | -0.001  | 118.0863 | 384 | 97.4 | Betaine                        |
| 118.0873 | 117.079 | -0.001  | 118.0863 | 281 | 61.2 | Betaine                        |
| 118.0873 | 117.079 | -0.001  | 118.0863 | 294 | 41   | Betaine                        |
| 97.0774  | 114.104 | 0.0238  | 97.1012  | 36  | 20.9 | Cyclohexanol, 1-Methyl-        |
| 106.0872 | 105     | 0       | 106.09   | 159 | 75.5 | Diethanolamine                 |
| 106.0872 | 105     | 0       | 106.09   | 149 | 77.3 | Diethanolamine                 |
| 84.0822  | 102.092 | -0.0014 | 84.0808  | 281 | 51   | Betaine Aldehyde Cation        |
| 84.0822  | 102.092 | -0.0014 | 84.0808  | 247 | 51   | Betaine Aldehyde Cation        |
| 84.0822  | 102.092 | -0.0014 | 84.0808  | 182 | 55.4 | Betaine Aldehyde Cation        |
| 186.0588 | 203.091 | 0.0285  | 186.0873 | 99  | 74   | Ala-Asn                        |
| 186.0588 | 163.084 | 0.0149  | 186.0737 | 114 | 100  | N,N-Bis(2-Hydroxyethyl)Glycine |
| 118.0873 | 117.079 | -0.001  | 118.0863 | 272 | 84   | Betaine                        |
| 118.0873 | 117.079 | -0.001  | 118.0863 | 379 | 47.2 | Betaine                        |
| 118.0873 | 117.079 | -0.001  | 118.0863 | 343 | 96   | Betaine                        |
| 118.0873 | 117.079 | -0.001  | 118.0863 | 363 | 53.1 | Betaine                        |
| 97.0774  | 114.104 | 0.0238  | 97.1012  | 43  | 25.5 | Cyclohexanemethanol            |
| 106.0872 | 105     | 0       | 106.09   | 152 | 77.2 | Diethanolamine                 |
| 84.0822  | 102.092 | -0.0014 | 84.0808  | 288 | 51   | Betaine Aldehyde Cation        |
| 84.0822  | 102.092 | -0.0014 | 84.0808  | 232 | 50   | Betaine Aldehyde Cation        |
| 84.0822  | 102.092 | -0.0014 | 84.0808  | 125 | 54.2 | Betaine Aldehyde Cation        |
| 106.0872 | 105     | 0       | 106.09   | 145 | 78.6 | Diethanolamine                 |
| 106.0872 | 105     | 0       | 106.09   | 161 | 79.9 | Diethanolamine                 |
| 84.0822  | 102.092 | -0.0014 | 84.0808  | 259 | 50   | Betaine Aldehyde Cation        |
| 84.0822  | 102.092 | -0.0014 | 84.0808  | 207 | 53.1 | Betaine Aldehyde Cation        |

|          |         |         |          |     |      |                                           |
|----------|---------|---------|----------|-----|------|-------------------------------------------|
| 84.0822  | 102.092 | -0.0014 | 84.0808  | 161 | 54.2 | Betaine Aldehyde Cation                   |
| 186.0588 | 203.091 | 0.0285  | 186.0873 | 50  | 68.7 | Ala-Asn                                   |
| 186.0588 | 163.084 | 0.0149  | 186.0737 | 123 | 100  | N,N-Bis(2-Hydroxyethyl)Glycine            |
| 118.0873 | 117.079 | -0.001  | 118.0863 | 360 | 59.5 | Betaine                                   |
| 118.0873 | 117.079 | -0.001  | 118.0863 | 297 | 64.4 | Betaine                                   |
| 118.0873 | 117.079 | -0.001  | 118.0863 | 380 | 48.9 | Betaine                                   |
| 148.0974 | 147     | -0.04   | 148.06   | 35  | 35.1 | N-Acetyl-DL-Serine                        |
| 148.0974 | 147     | -0.04   | 148.06   | 36  | 100  | O-Acetyl-L-Serine Hydrochloride           |
| 148.0974 | 147.053 | -0.037  | 148.0604 | 171 | 100  | O-Acetyl-L-Serine                         |
| 393.2988 | 392.293 | 0.0011  | 393.2999 | 41  | 100  | Chenodeoxycholic Acid                     |
| 371.2972 | 370.308 | 0.0184  | 371.3156 | 227 | 100  | Hexanedioic Acid, Bis(2-Ethylhexyl) Ester |
| 371.2972 | 370.308 | 0.0184  | 371.3156 | 123 | 100  | Hexanedioic Acid, Bis(2-Ethylhexyl) Ester |
| 371.2972 | 370.308 | 0.0184  | 371.3156 | 67  | 100  | Hexanedioic Acid, Bis(2-Ethylhexyl) Ester |
| 371.2972 | 370.308 | 0.0184  | 371.3156 | 104 | 100  | Hexanedioic Acid, Bis(2-Ethylhexyl) Ester |
| 118.0873 | 117.079 | -0.001  | 118.0863 | 372 | 54.7 | Betaine                                   |
| 118.0873 | 117.079 | -0.001  | 118.0863 | 339 | 39.5 | Betaine                                   |
| 118.0873 | 117.079 | -0.001  | 118.0863 | 354 | 57   | Betaine                                   |
| 97.0774  | 114.104 | 0.0238  | 97.1012  | 37  | 24.1 | Cyclohexanol, 1-Methyl-                   |
| 106.0872 | 105.079 | -0.0009 | 106.0863 | 120 | 100  | Diethanolamine                            |
| 106.0872 | 105     | 0       | 106.09   | 159 | 78.9 | Diethanolamine                            |
| 84.0822  | 102.092 | -0.0014 | 84.0808  | 275 | 51   | Betaine Aldehyde Cation                   |
| 84.0822  | 102.092 | -0.0014 | 84.0808  | 218 | 50   | Betaine Aldehyde Cation                   |
| 186.0588 | 163.084 | 0.0149  | 186.0737 | 138 | 100  | N,N-Bis(2-Hydroxyethyl)Glycine            |
| 118.0873 | 117.079 | -0.001  | 118.0863 | 369 | 33.3 | Betaine                                   |
| 118.0873 | 117.079 | -0.001  | 118.0863 | 278 | 59.7 | Betaine                                   |
| 118.0873 | 117.079 | -0.001  | 118.0863 | 280 | 60.4 | Betaine                                   |
| 97.0774  | 114.104 | 0.0238  | 97.1012  | 39  | 24.7 | Cyclohexanol, 4-Methyl-, Trans-           |
| 106.0872 | 105.079 | -0.0009 | 106.0863 | 124 | 100  | Diethanolamine                            |
| 106.0872 | 105     | 0       | 106.09   | 159 | 75.5 | Diethanolamine                            |
| 106.0872 | 105     | 0       | 106.09   | 153 | 80.7 | Diethanolamine                            |
| 84.0822  | 102.092 | -0.0014 | 84.0808  | 257 | 51   | Betaine Aldehyde Cation                   |
| 84.0822  | 102.092 | -0.0014 | 84.0808  | 228 | 52   | Betaine Aldehyde Cation                   |
| 84.0822  | 102.092 | -0.0014 | 84.0808  | 145 | 54.2 | Betaine Aldehyde Cation                   |
| 84.0822  | 102.092 | -0.0014 | 84.0808  | 156 | 53.1 | Betaine Aldehyde Cation                   |
| 186.0588 | 370.196 | 0.0467  | 186.1055 | 61  | 100  | Ser-His-Lys                               |
| 186.0588 | 163.084 | 0.0149  | 186.0737 | 164 | 92.8 | N,N-Bis(2-Hydroxyethyl)Glycine            |
| 106.0872 | 105     | 0       | 106.09   | 155 | 78.9 | Diethanolamine                            |
| 106.0872 | 105     | 0       | 106.09   | 157 | 67.3 | Diethanolamine                            |
| 84.0822  | 102.092 | -0.0014 | 84.0808  | 267 | 53.1 | Betaine Aldehyde Cation                   |

|          |         |         |          |     |      |                                           |
|----------|---------|---------|----------|-----|------|-------------------------------------------|
| 84.0822  | 102.092 | -0.0014 | 84.0808  | 186 | 50   | Betaine Aldehyde Cation                   |
| 84.0822  | 102.092 | -0.0014 | 84.0808  | 172 | 51   | Betaine Aldehyde Cation                   |
| 148.0974 | 147.053 | -0.037  | 148.0604 | 22  | 31.5 | O-Acetyl-L-Serine                         |
| 118.0873 | 117.079 | -0.001  | 118.0863 | 412 | 36.3 | Betaine                                   |
| 118.0873 | 117.079 | -0.001  | 118.0863 | 295 | 22.8 | Betaine                                   |
| 118.0873 | 117.079 | -0.001  | 118.0863 | 334 | 64.1 | Betaine                                   |
| 148.0974 | 147.053 | -0.037  | 148.0604 | 172 | 47   | O-Acetyl-L-Serine                         |
| 393.2988 | 392.293 | 0.0011  | 393.2999 | 16  | 100  | Chenodeoxycholic Acid                     |
| 371.2972 | 370.308 | 0.0184  | 371.3156 | 205 | 100  | Hexanedioic Acid, Bis(2-Ethylhexyl) Ester |
| 371.2972 | 370.308 | 0.0184  | 371.3156 | 103 | 100  | Hexanedioic Acid, Bis(2-Ethylhexyl) Ester |
| 371.2972 | 370.308 | 0.0184  | 371.3156 | 81  | 100  | Hexanedioic Acid, Bis(2-Ethylhexyl) Ester |
| 371.2972 | 370.308 | 0.0184  | 371.3156 | 114 | 100  | Hexanedioic Acid, Bis(2-Ethylhexyl) Ester |
| 118.0873 | 117.079 | -0.001  | 118.0863 | 369 | 67.7 | Betaine                                   |
| 118.0873 | 117.079 | -0.001  | 118.0863 | 283 | 62.4 | Betaine                                   |
| 118.0873 | 117.079 | -0.001  | 118.0863 | 347 | 61.1 | Betaine                                   |
| 106.0872 | 105     | 0       | 106.09   | 158 | 75.7 | Diethanolamine                            |
| 106.0872 | 105     | 0       | 106.09   | 152 | 74.2 | Diethanolamine                            |
| 106.0872 | 105     | 0       | 106.09   | 268 | 77.1 | Diethanolamine                            |
| 84.0822  | 102.092 | -0.0014 | 84.0808  | 292 | 54.2 | Betaine Aldehyde Cation                   |
| 84.0822  | 102.092 | -0.0014 | 84.0808  | 260 | 53.1 | Betaine Aldehyde Cation                   |
| 84.0822  | 102.092 | -0.0014 | 84.0808  | 203 | 56   | Betaine Aldehyde Cation                   |
| 186.0588 | 163.084 | 0.0149  | 186.0737 | 158 | 93.4 | N,N-Bis(2-Hydroxyethyl)Glycine            |
| 186.0588 | 163.084 | 0.0149  | 186.0737 | 145 | 100  | N,N-Bis(2-Hydroxyethyl)Glycine            |
| 118.0873 | 117.079 | -0.001  | 118.0863 | 333 | 36.4 | Betaine                                   |
| 118.0873 | 117.079 | -0.001  | 118.0863 | 333 | 37.8 | Betaine                                   |
| 118.0873 | 117.079 | -0.001  | 118.0863 | 380 | 52.3 | Betaine                                   |
| 97.0774  | 114.104 | 0.0238  | 97.1012  | 27  | 23.1 | Cyclohexanol, 1-Methyl-                   |
| 106.0872 | 105     | 0       | 106.09   | 219 | 78.6 | Diethanolamine                            |
| 106.0872 | 105     | 0       | 106.09   | 181 | 64.4 | Diethanolamine                            |
| 84.0822  | 102.092 | -0.0014 | 84.0808  | 255 | 51   | Betaine Aldehyde Cation                   |
| 84.0822  | 102.092 | -0.0014 | 84.0808  | 228 | 56   | Betaine Aldehyde Cation                   |
| 84.0822  | 102.092 | -0.0014 | 84.0808  | 160 | 53.1 | Betaine Aldehyde Cation                   |
| 186.0588 | 163.084 | 0.0149  | 186.0737 | 113 | 100  | N,N-Bis(2-Hydroxyethyl)Glycine            |
| 186.0588 | 163.084 | 0.0149  | 186.0737 | 153 | 100  | N,N-Bis(2-Hydroxyethyl)Glycine            |
| 106.0872 | 105     | 0       | 106.09   | 158 | 77.9 | Diethanolamine                            |
| 106.0872 | 105     | 0       | 106.09   | 159 | 72.3 | Diethanolamine                            |
| 106.0872 | 105     | 0       | 106.09   | 144 | 78.2 | Diethanolamine                            |
| 84.0822  | 102.092 | -0.0014 | 84.0808  | 262 | 53.1 | Betaine Aldehyde Cation                   |
| 84.0822  | 102.092 | -0.0014 | 84.0808  | 198 | 53.1 | Betaine Aldehyde Cation                   |



|          |         |         |          |     |      |                                 |
|----------|---------|---------|----------|-----|------|---------------------------------|
| 84.0822  | 102.092 | -0.0014 | 84.0808  | 161 | 51   | Betaine Aldehyde Cation         |
| 84.0822  | 102.092 | -0.0014 | 84.0808  | 180 | 52   | Betaine Aldehyde Cation         |
| 186.0588 | 203.091 | 0.0285  | 186.0873 | 83  | 100  | Ala-Asn                         |
| 186.0588 | 370.196 | 0.0467  | 186.1055 | 97  | 100  | Ser-His-Lys                     |
| 186.0588 | 370.196 | 0.0467  | 186.1055 | 81  | 100  | Ser-His-Lys                     |
| 148.0974 | 147     | -0.04   | 148.06   | 13  | 100  | O-Acetyl-L-Serine Hydrochloride |
| 148.0974 | 147.053 | -0.037  | 148.0604 | 56  | 55.5 | O-Acetyl-L-Serine               |
| 148.0974 | 147.053 | -0.037  | 148.0604 | 173 | 76.6 | O-Acetyl-L-Serine               |
| 148.0974 | 147.053 | -0.037  | 148.0604 | 129 | 58   | O-Acetyl-L-Serine               |
| 118.0873 | 117.079 | -0.001  | 118.0863 | 356 | 62.8 | Betaine                         |
| 118.0873 | 117.079 | -0.001  | 118.0863 | 334 | 56.8 | Betaine                         |
| 118.0873 | 117.079 | -0.001  | 118.0863 | 341 | 56   | Betaine                         |
| 106.0872 | 105     | 0       | 106.09   | 159 | 71.7 | Diethanolamine                  |
| 106.0872 | 105.079 | -0.0009 | 106.0863 | 109 | 100  | Diethanolamine                  |
| 84.0822  | 102.092 | -0.0014 | 84.0808  | 284 | 51   | Betaine Aldehyde Cation         |
| 84.0822  | 102.092 | -0.0014 | 84.0808  | 221 | 51   | Betaine Aldehyde Cation         |
| 84.0822  | 102.092 | -0.0014 | 84.0808  | 203 | 52   | Betaine Aldehyde Cation         |
| 118.0873 | 117.079 | -0.001  | 118.0863 | 376 | 50.4 | Betaine                         |
| 118.0873 | 117.079 | -0.001  | 118.0863 | 348 | 97.6 | Betaine                         |
| 118.0873 | 117     | 0       | 118.09   | 348 | 26.1 | Betaine                         |
| 84.0822  | 102.092 | -0.0014 | 84.0808  | 231 | 51   | Betaine Aldehyde Cation         |
| 84.0822  | 102.092 | -0.0014 | 84.0808  | 212 | 50   | Betaine Aldehyde Cation         |
| 84.0822  | 102.092 | -0.0014 | 84.0808  | 142 | 54.2 | Betaine Aldehyde Cation         |
| 186.0588 | 163.084 | 0.0149  | 186.0737 | 153 | 100  | N,N-Bis(2-Hydroxyethyl)Glycine  |
| 148.0974 | 147     | -0.04   | 148.06   | 41  | 100  | O-Acetyl-L-Serine Hydrochloride |
| 118.0873 | 117.079 | -0.001  | 118.0863 | 367 | 36.4 | Betaine                         |
| 118.0873 | 117.079 | -0.001  | 118.0863 | 316 | 75   | Betaine                         |
| 118.0873 | 117.079 | -0.001  | 118.0863 | 355 | 51.9 | Betaine                         |
| 97.0774  | 114.104 | 0.0238  | 97.1012  | 41  | 100  | Cyclohexanol, 4-Methyl-, Trans- |
| 97.0774  | 114.104 | 0.0238  | 97.1012  | 48  | 25   | Cyclohexanol, 4-Methyl-, Trans- |
| 106.0872 | 105     | 0       | 106.09   | 158 | 76.9 | Diethanolamine                  |
| 106.0872 | 105     | 0       | 106.09   | 159 | 74.9 | Diethanolamine                  |
| 106.0872 | 105     | 0       | 106.09   | 158 | 79.9 | Diethanolamine                  |
| 84.0822  | 102.092 | -0.0014 | 84.0808  | 280 | 50   | Betaine Aldehyde Cation         |
| 84.0822  | 102.092 | -0.0014 | 84.0808  | 259 | 52   | Betaine Aldehyde Cation         |
| 84.0822  | 102.092 | -0.0014 | 84.0808  | 160 | 51   | Betaine Aldehyde Cation         |
| 84.0822  | 102.092 | -0.0014 | 84.0808  | 205 | 51   | Betaine Aldehyde Cation         |
| 106.0872 | 105     | 0       | 106.09   | 171 | 75.3 | Diethanolamine                  |
| 106.0872 | 105     | 0       | 106.09   | 159 | 78.9 | Diethanolamine                  |
| 106.0872 | 105     | 0       | 106.09   | 159 | 74.3 | Diethanolamine                  |
| 84.0822  | 102.092 | -0.0014 | 84.0808  | 241 | 52   | Betaine Aldehyde Cation         |

|          |         |         |          |     |      |                                           |
|----------|---------|---------|----------|-----|------|-------------------------------------------|
| 84.0822  | 102.092 | -0.0014 | 84.0808  | 236 | 53.1 | Betaine Aldehyde Cation                   |
| 84.0822  | 102.092 | -0.0014 | 84.0808  | 189 | 56   | Betaine Aldehyde Cation                   |
| 186.0588 | 163.084 | 0.0149  | 186.0737 | 112 | 83.6 | N,N-Bis(2-Hydroxyethyl)Glycine            |
| 186.0588 | 370.196 | 0.0467  | 186.1055 | 94  | 100  | Ser-His-Lys                               |
| 148.0974 | 147.053 | -0.037  | 148.0604 | 147 | 100  | O-Acetyl-L-Serine                         |
| 148.0974 | 147.053 | -0.037  | 148.0604 | 163 | 100  | O-Acetyl-L-Serine                         |
| 118.0873 | 117.079 | -0.001  | 118.0863 | 340 | 36   | Betaine                                   |
| 118.0873 | 117.079 | -0.001  | 118.0863 | 287 | 67.5 | Betaine                                   |
| 118.0873 | 117.079 | -0.001  | 118.0863 | 359 | 52.1 | Betaine                                   |
| 148.0974 | 147     | -0.04   | 148.06   | 31  | 67.3 | O-Acetyl-L-Serine Hydrochloride           |
| 371.2927 | 370.308 | 0.0229  | 371.3156 | 184 | 100  | Hexanedioic Acid, Bis(2-Ethylhexyl) Ester |
| 371.2927 | 370.308 | 0.0229  | 371.3156 | 178 | 76.9 | Hexanedioic Acid, Bis(2-Ethylhexyl) Ester |
| 371.2927 | 370.308 | 0.0229  | 371.3156 | 81  | 100  | Hexanedioic Acid, Bis(2-Ethylhexyl) Ester |
| 118.0873 | 117.079 | -0.001  | 118.0863 | 322 | 29.1 | Betaine                                   |
| 118.0873 | 117.079 | -0.001  | 118.0863 | 323 | 99   | Betaine                                   |
| 118.0873 | 117.079 | -0.001  | 118.0863 | 343 | 31.4 | Betaine                                   |
| 106.0872 | 105     | 0       | 106.09   | 166 | 71.6 | Diethanolamine                            |
| 84.0822  | 102.092 | -0.0014 | 84.0808  | 266 | 56   | Betaine Aldehyde Cation                   |
| 84.0822  | 102.092 | -0.0014 | 84.0808  | 279 | 51   | Betaine Aldehyde Cation                   |
| 84.0822  | 102.092 | -0.0014 | 84.0808  | 167 | 51   | Betaine Aldehyde Cation                   |
| 84.0822  | 102.092 | -0.0014 | 84.0808  | 163 | 51   | Betaine Aldehyde Cation                   |
| 118.0873 | 117.079 | -0.001  | 118.0863 | 356 | 53.9 | Betaine                                   |
| 118.0873 | 117.079 | -0.001  | 118.0863 | 329 | 82.7 | Betaine                                   |
| 118.0873 | 117.079 | -0.001  | 118.0863 | 323 | 29.3 | Betaine                                   |
| 97.0774  | 114.104 | 0.0238  | 97.1012  | 49  | 32.3 | Cyclohexanol, 1-Methyl-                   |
| 106.0872 | 105     | 0       | 106.09   | 208 | 76.5 | Diethanolamine                            |
| 106.0872 | 105     | 0       | 106.09   | 211 | 77   | Diethanolamine                            |
| 84.0822  | 102.092 | -0.0014 | 84.0808  | 319 | 53.1 | Betaine Aldehyde Cation                   |
| 84.0822  | 102.092 | -0.0014 | 84.0808  | 248 | 53.1 | Betaine Aldehyde Cation                   |
| 84.0822  | 102.092 | -0.0014 | 84.0808  | 120 | 54.2 | Betaine Aldehyde Cation                   |
| 186.0588 | 163.084 | 0.0149  | 186.0737 | 205 | 100  | N,N-Bis(2-Hydroxyethyl)Glycine            |
| 186.0588 | 163.084 | 0.0149  | 186.0737 | 152 | 100  | N,N-Bis(2-Hydroxyethyl)Glycine            |
| 97.0774  | 114.104 | 0.0238  | 97.1012  | 33  | 23.1 | Cyclohexanol, 1-Methyl-                   |
| 106.0872 | 105     | 0       | 106.09   | 196 | 78.9 | Diethanolamine                            |
| 106.0872 | 105.079 | -0.0009 | 106.0863 | 108 | 100  | Diethanolamine                            |
| 84.0822  | 102.092 | -0.0014 | 84.0808  | 251 | 54.2 | Betaine Aldehyde Cation                   |
| 84.0822  | 102.092 | -0.0014 | 84.0808  | 279 | 52   | Betaine Aldehyde Cation                   |
| 84.0822  | 102.092 | -0.0014 | 84.0808  | 138 | 51   | Betaine Aldehyde Cation                   |
| 186.0588 | 163.084 | 0.0149  | 186.0737 | 116 | 79.3 | N,N-Bis(2-Hydroxyethyl)Glycine            |

|          |         |         |          |     |      |                                 |
|----------|---------|---------|----------|-----|------|---------------------------------|
| 186.0588 | 163.084 | 0.0149  | 186.0737 | 104 | 100  | N,N-Bis(2-Hydroxyethyl)Glycine  |
| 148.0974 | 147     | -0.04   | 148.06   | 44  | 26.5 | N-Acetyl-DL-Serine              |
| 148.0974 | 147     | -0.04   | 148.06   | 36  | 28.1 | O-Acetyl-L-Serine Hydrochloride |
| 148.0974 | 147.053 | -0.037  | 148.0604 | 103 | 52.8 | O-Acetyl-L-Serine               |
| 118.0873 | 117.079 | -0.001  | 118.0863 | 362 | 33.5 | Betaine                         |
| 118.0873 | 117.079 | -0.001  | 118.0863 | 321 | 49.9 | Betaine                         |
| 118.0873 | 117.079 | -0.001  | 118.0863 | 337 | 62   | Betaine                         |
| 148.0974 | 147     | -0.04   | 148.06   | 88  | 36.4 | O-Acetyl-L-Serine Hydrochloride |
| 148.0974 | 147.053 | -0.037  | 148.0604 | 114 | 100  | O-Acetyl-L-Serine               |
| 148.0974 | 147.053 | -0.037  | 148.0604 | 151 | 52.1 | O-Acetyl-L-Serine               |
| 118.0873 | 117.079 | -0.001  | 118.0863 | 384 | 47.1 | Betaine                         |
| 118.0873 | 117.079 | -0.001  | 118.0863 | 253 | 76.1 | Betaine                         |
| 118.0873 | 117.079 | -0.001  | 118.0863 | 306 | 34.8 | Betaine                         |
| 106.0872 | 105     | 0       | 106.09   | 180 | 73.5 | Diethanolamine                  |
| 106.0872 | 105     | 0       | 106.09   | 159 | 74.3 | Diethanolamine                  |
| 106.0872 | 105     | 0       | 106.09   | 196 | 80.2 | Diethanolamine                  |
| 84.0822  | 102.092 | -0.0014 | 84.0808  | 282 | 50   | Betaine Aldehyde Cation         |
| 84.0822  | 102.092 | -0.0014 | 84.0808  | 241 | 55.4 | Betaine Aldehyde Cation         |
| 84.0822  | 102.092 | -0.0014 | 84.0808  | 209 | 54.2 | Betaine Aldehyde Cation         |
| 84.0822  | 102.092 | -0.0014 | 84.0808  | 168 | 53.1 | Betaine Aldehyde Cation         |
| 186.0588 | 163.084 | 0.0149  | 186.0737 | 163 | 100  | N,N-Bis(2-Hydroxyethyl)Glycine  |
| 186.0588 | 163.084 | 0.0149  | 186.0737 | 153 | 100  | N,N-Bis(2-Hydroxyethyl)Glycine  |
| 186.0588 | 163.084 | 0.0149  | 186.0737 | 153 | 100  | N,N-Bis(2-Hydroxyethyl)Glycine  |
| 118.0873 | 117.079 | -0.001  | 118.0863 | 361 | 37.1 | Betaine                         |
| 118.0873 | 117.079 | -0.001  | 118.0863 | 314 | 80.4 | Betaine                         |
| 118.0873 | 117.079 | -0.001  | 118.0863 | 314 | 56.2 | Betaine                         |
| 97.0774  | 114.104 | 0.0238  | 97.1012  | 36  | 26.5 | Cyclohexanemethanol             |
| 106.0872 | 105     | 0       | 106.09   | 228 | 76.3 | Diethanolamine                  |
| 106.0872 | 105     | 0       | 106.09   | 158 | 76.1 | Diethanolamine                  |
| 106.0872 | 105.079 | -0.0009 | 106.0863 | 141 | 100  | Diethanolamine                  |
| 84.0822  | 102.092 | -0.0014 | 84.0808  | 281 | 54.2 | Betaine Aldehyde Cation         |
| 84.0822  | 102.092 | -0.0014 | 84.0808  | 270 | 53.1 | Betaine Aldehyde Cation         |
| 84.0822  | 102.092 | -0.0014 | 84.0808  | 171 | 52   | Betaine Aldehyde Cation         |
| 186.0588 | 163.084 | 0.0149  | 186.0737 | 154 | 84   | N,N-Bis(2-Hydroxyethyl)Glycine  |
| 186.0588 | 163.084 | 0.0149  | 186.0737 | 153 | 100  | N,N-Bis(2-Hydroxyethyl)Glycine  |
| 106.0872 | 105.079 | -0.0009 | 106.0863 | 134 | 100  | Diethanolamine                  |
| 106.0872 | 105     | 0       | 106.09   | 170 | 79.9 | Diethanolamine                  |
| 106.0872 | 105.079 | -0.0009 | 106.0863 | 204 | 100  | Diethanolamine                  |
| 84.0822  | 102.092 | -0.0014 | 84.0808  | 267 | 51   | Betaine Aldehyde Cation         |
| 84.0822  | 102.092 | -0.0014 | 84.0808  | 230 | 50   | Betaine Aldehyde Cation         |
| 84.0822  | 102.092 | -0.0014 | 84.0808  | 200 | 53.1 | Betaine Aldehyde Cation         |

|          |         |         |          |     |      |                                 |
|----------|---------|---------|----------|-----|------|---------------------------------|
| 186.0588 | 370.196 | 0.0467  | 186.1055 | 50  | 100  | Ser-His-Lys                     |
| 118.0873 | 117.079 | -0.001  | 118.0863 | 318 | 43.4 | Betaine                         |
| 118.0873 | 117.079 | -0.001  | 118.0863 | 281 | 60.6 | Betaine                         |
| 118.0873 | 117.079 | -0.001  | 118.0863 | 322 | 57   | Betaine                         |
| 148.0974 | 147.053 | -0.037  | 148.0604 | 136 | 100  | O-Acetyl-L-Serine               |
| 118.0873 | 117.079 | -0.001  | 118.0863 | 337 | 31.3 | Betaine                         |
| 118.0873 | 117.079 | -0.001  | 118.0863 | 235 | 67.6 | Betaine                         |
| 118.0873 | 117.079 | -0.001  | 118.0863 | 331 | 39   | Betaine                         |
| 106.0872 | 105     | 0       | 106.09   | 159 | 75.8 | Diethanolamine                  |
| 106.0872 | 105.079 | -0.0009 | 106.0863 | 107 | 100  | Diethanolamine                  |
| 84.0822  | 102.092 | -0.0014 | 84.0808  | 298 | 50   | Betaine Aldehyde Cation         |
| 84.0822  | 102.092 | -0.0014 | 84.0808  | 240 | 50   | Betaine Aldehyde Cation         |
| 84.0822  | 102.092 | -0.0014 | 84.0808  | 155 | 56   | Betaine Aldehyde Cation         |
| 186.0588 | 168.042 | 0.0173  | 186.0761 | 26  | 100  | 3-Hydroxy-4-Methoxybenzoic Acid |
| 186.0588 | 370.196 | 0.0467  | 186.1055 | 55  | 100  | Ser-His-Lys                     |
| 186.0588 | 163.084 | 0.0149  | 186.0737 | 157 | 100  | N,N-Bis(2-Hydroxyethyl)Glycine  |
| 118.0873 | 117.079 | -0.001  | 118.0863 | 415 | 58.5 | Betaine                         |
| 118.0873 | 117.079 | -0.001  | 118.0863 | 319 | 33.5 | Betaine                         |
| 118.0873 | 117.079 | -0.001  | 118.0863 | 380 | 34.7 | Betaine                         |
| 97.0774  | 114.104 | 0.0238  | 97.1012  | 40  | 20.8 | Cyclohexanemethanol             |
| 106.0872 | 105     | 0       | 106.09   | 171 | 77.9 | Diethanolamine                  |
| 106.0872 | 105     | 0       | 106.09   | 212 | 63.5 | Diethanolamine                  |
| 84.0822  | 102.092 | -0.0014 | 84.0808  | 292 | 55.4 | Betaine Aldehyde Cation         |
| 84.0822  | 102.092 | -0.0014 | 84.0808  | 225 | 52   | Betaine Aldehyde Cation         |
| 84.0822  | 102.092 | -0.0014 | 84.0808  | 149 | 53.1 | Betaine Aldehyde Cation         |
| 186.0588 | 370.196 | 0.0467  | 186.1055 | 37  | 64.7 | Ser-His-Lys                     |
| 186.0588 | 163.084 | 0.0149  | 186.0737 | 120 | 100  | N,N-Bis(2-Hydroxyethyl)Glycine  |
| 186.0588 | 370.196 | 0.0467  | 186.1055 | 70  | 60   | Ser-His-Lys                     |
| 186.0588 | 370.196 | 0.0467  | 186.1055 | 72  | 100  | Ser-His-Lys                     |
| 106.0872 | 105     | 0       | 106.09   | 153 | 78.9 | Diethanolamine                  |
| 106.0872 | 105.079 | -0.0009 | 106.0863 | 131 | 100  | Diethanolamine                  |
| 84.0822  | 102.092 | -0.0014 | 84.0808  | 279 | 52   | Betaine Aldehyde Cation         |
| 84.0822  | 102.092 | -0.0014 | 84.0808  | 233 | 54.2 | Betaine Aldehyde Cation         |
| 84.0822  | 102.092 | -0.0014 | 84.0808  | 173 | 52   | Betaine Aldehyde Cation         |
| 186.0588 | 163.084 | 0.0149  | 186.0737 | 126 | 100  | N,N-Bis(2-Hydroxyethyl)Glycine  |
| 148.0974 | 147.053 | -0.037  | 148.0604 | 123 | 100  | O-Acetyl-L-Serine               |
| 118.0873 | 117.079 | -0.001  | 118.0863 | 340 | 53.1 | Betaine                         |
| 118.0873 | 117.079 | -0.001  | 118.0863 | 291 | 97.1 | Betaine                         |
| 118.0873 | 117.079 | -0.001  | 118.0863 | 377 | 51.1 | Betaine                         |
| 393.2988 | 392.293 | 0.0011  | 393.2999 | 37  | 100  | Chenodeoxycholic Acid           |
| 371.2927 | 370.308 | 0.0229  | 371.3156 | 186 | 100  | Hexanedioic Acid, Bis(2-        |

|          |         |         |          |     |      |                                           |
|----------|---------|---------|----------|-----|------|-------------------------------------------|
|          |         |         |          |     |      | Ethylhexyl) Ester                         |
| 371.2927 | 370.308 | 0.0229  | 371.3156 | 153 | 100  | Hexanedioic Acid, Bis(2-Ethylhexyl) Ester |
| 371.2927 | 370.308 | 0.0229  | 371.3156 | 21  | 100  | Hexanedioic Acid, Bis(2-Ethylhexyl) Ester |
| 371.2927 | 370.308 | 0.0229  | 371.3156 | 125 | 74.8 | Hexanedioic Acid, Bis(2-Ethylhexyl) Ester |
| 118.0873 | 117.079 | -0.001  | 118.0863 | 391 | 34.4 | Betaine                                   |
| 118.0873 | 117.079 | -0.001  | 118.0863 | 291 | 66.1 | Betaine                                   |
| 118.0873 | 117.079 | -0.001  | 118.0863 | 290 | 64.3 | Betaine                                   |
| 97.0774  | 114.104 | 0.0238  | 97.1012  | 35  | 23   | Cyclohexanemethanol                       |
| 106.0872 | 105     | 0       | 106.09   | 159 | 79.3 | Diethanolamine                            |
| 106.0872 | 105     | 0       | 106.09   | 218 | 77.9 | Diethanolamine                            |
| 84.0822  | 102.092 | -0.0014 | 84.0808  | 290 | 51   | Betaine Aldehyde Cation                   |
| 84.0822  | 102.092 | -0.0014 | 84.0808  | 233 | 51   | Betaine Aldehyde Cation                   |
| 84.0822  | 102.092 | -0.0014 | 84.0808  | 150 | 55.4 | Betaine Aldehyde Cation                   |
| 84.0822  | 102.092 | -0.0014 | 84.0808  | 182 | 54.2 | Betaine Aldehyde Cation                   |
| 186.0588 | 163.084 | 0.0149  | 186.0737 | 121 | 83.5 | N,N-Bis(2-Hydroxyethyl)Glycine            |
| 186.0588 | 163.084 | 0.0149  | 186.0737 | 145 | 88.3 | N,N-Bis(2-Hydroxyethyl)Glycine            |
| 186.0588 | 163.084 | 0.0149  | 186.0737 | 152 | 100  | N,N-Bis(2-Hydroxyethyl)Glycine            |
| 148.0974 | 147.053 | -0.037  | 148.0604 | 98  | 45.8 | O-Acetyl-L-Serine                         |
| 148.0974 | 147.053 | -0.037  | 148.0604 | 272 | 75.6 | O-Acetyl-L-Serine                         |
| 148.0974 | 147.053 | -0.037  | 148.0604 | 212 | 79.6 | O-Acetyl-L-Serine                         |
| 97.0774  | 114.104 | 0.0238  | 97.1012  | 35  | 19.5 | Cyclohexanol, 1-Methyl-                   |
| 97.0774  | 114.104 | 0.0238  | 97.1012  | 22  | 100  | Cyclohexanol, 4-Methyl-, Trans-           |
| 118.0873 | 117.079 | -0.001  | 118.0863 | 310 | 49.9 | Betaine                                   |
| 118.0873 | 117.079 | -0.001  | 118.0863 | 395 | 38   | Betaine                                   |
| 118.0873 | 117.079 | -0.001  | 118.0863 | 305 | 68.3 | Betaine                                   |
| 118.0873 | 117.079 | -0.001  | 118.0863 | 286 | 66   | Betaine                                   |
| 106.0872 | 105     | 0       | 106.09   | 159 | 74.1 | Diethanolamine                            |
| 106.0872 | 105     | 0       | 106.09   | 152 | 74.8 | Diethanolamine                            |
| 106.0872 | 105     | 0       | 106.09   | 176 | 77.5 | Diethanolamine                            |
| 84.0822  | 102.092 | -0.0014 | 84.0808  | 292 | 54.2 | Betaine Aldehyde Cation                   |
| 84.0822  | 102.092 | -0.0014 | 84.0808  | 259 | 50   | Betaine Aldehyde Cation                   |
| 84.0822  | 102.092 | -0.0014 | 84.0808  | 197 | 54.2 | Betaine Aldehyde Cation                   |
| 84.0822  | 102.092 | -0.0014 | 84.0808  | 200 | 55.4 | Betaine Aldehyde Cation                   |
| 186.0588 | 370.196 | 0.0467  | 186.1055 | 60  | 100  | Ser-His-Lys                               |
| 186.0588 | 163.084 | 0.0149  | 186.0737 | 141 | 100  | N,N-Bis(2-Hydroxyethyl)Glycine            |
| 118.0873 | 117.079 | -0.001  | 118.0863 | 307 | 61.8 | Betaine                                   |
| 118.0873 | 117.079 | -0.001  | 118.0863 | 378 | 39.3 | Betaine                                   |
| 118.0873 | 117.079 | -0.001  | 118.0863 | 299 | 66.7 | Betaine                                   |
| 118.0873 | 117.079 | -0.001  | 118.0863 | 323 | 61.8 | Betaine                                   |

|          |         |         |          |     |      |                                 |
|----------|---------|---------|----------|-----|------|---------------------------------|
| 106.0872 | 105     | 0       | 106.09   | 156 | 80.7 | Diethanolamine                  |
| 84.0822  | 102.092 | -0.0014 | 84.0808  | 304 | 54.2 | Betaine Aldehyde Cation         |
| 84.0822  | 102.092 | -0.0014 | 84.0808  | 287 | 55.4 | Betaine Aldehyde Cation         |
| 84.0822  | 102.092 | -0.0014 | 84.0808  | 208 | 53.1 | Betaine Aldehyde Cation         |
| 186.0588 | 163.084 | 0.0149  | 186.0737 | 183 | 94   | N,N-Bis(2-Hydroxyethyl)Glycine  |
| 186.0588 | 370.196 | 0.0467  | 186.1055 | 104 | 100  | Ser-His-Lys                     |
| 118.0873 | 117.079 | -0.001  | 118.0863 | 339 | 62.8 | Betaine                         |
| 118.0873 | 117.079 | -0.001  | 118.0863 | 283 | 35.8 | Betaine                         |
| 118.0873 | 117.079 | -0.001  | 118.0863 | 310 | 33.9 | Betaine                         |
| 97.0774  | 114.104 | 0.0238  | 97.1012  | 48  | 25   | Cyclohexanemethanol             |
| 106.0872 | 105     | 0       | 106.09   | 160 | 73.8 | Diethanolamine                  |
| 106.0872 | 105     | 0       | 106.09   | 157 | 74.7 | Diethanolamine                  |
| 84.0822  | 102.092 | -0.0014 | 84.0808  | 304 | 52   | Betaine Aldehyde Cation         |
| 84.0822  | 102.092 | -0.0014 | 84.0808  | 237 | 50   | Betaine Aldehyde Cation         |
| 84.0822  | 102.092 | -0.0014 | 84.0808  | 196 | 54.2 | Betaine Aldehyde Cation         |
| 148.0974 | 147.053 | -0.037  | 148.0604 | 134 | 100  | O-Acetyl-L-Serine               |
| 118.0873 | 117.079 | -0.001  | 118.0863 | 320 | 60.8 | Betaine                         |
| 118.0873 | 117.079 | -0.001  | 118.0863 | 267 | 60   | Betaine                         |
| 118.0873 | 117.079 | -0.001  | 118.0863 | 313 | 35   | Betaine                         |
| 186.0588 | 370.196 | 0.0467  | 186.1055 | 48  | 100  | Ser-His-Lys                     |
| 186.0588 | 370.196 | 0.0467  | 186.1055 | 46  | 100  | Ser-His-Lys                     |
| 186.0588 | 163.084 | 0.0149  | 186.0737 | 166 | 94   | N,N-Bis(2-Hydroxyethyl)Glycine  |
| 148.0974 | 147     | -0.04   | 148.06   | 63  | 60   | O-Acetyl-L-Serine Hydrochloride |
| 148.0974 | 147.053 | -0.037  | 148.0604 | 168 | 74.9 | O-Acetyl-L-Serine               |
| 97.0774  | 114.104 | 0.0238  | 97.1012  | 37  | 26.2 | Cyclohexanol, 1-Methyl-         |
| 97.0774  | 114.104 | 0.0238  | 97.1012  | 24  | 22.9 | Cyclohexanol, 1-Methyl-         |
| 118.0873 | 117.079 | -0.001  | 118.0863 | 278 | 83   | Betaine                         |
| 118.0873 | 117.079 | -0.001  | 118.0863 | 433 | 34.6 | Betaine                         |
| 118.0873 | 117.079 | -0.001  | 118.0863 | 294 | 75.4 | Betaine                         |
| 118.0873 | 117.079 | -0.001  | 118.0863 | 273 | 56.9 | Betaine                         |
| 106.0872 | 105     | 0       | 106.09   | 170 | 79.9 | Diethanolamine                  |
| 106.0872 | 105     | 0       | 106.09   | 158 | 73.9 | Diethanolamine                  |
| 106.0872 | 105     | 0       | 106.09   | 136 | 78.9 | Diethanolamine                  |
| 84.0822  | 102.092 | -0.0014 | 84.0808  | 315 | 52   | Betaine Aldehyde Cation         |
| 84.0822  | 102.092 | -0.0014 | 84.0808  | 195 | 51   | Betaine Aldehyde Cation         |
| 84.0822  | 102.092 | -0.0014 | 84.0808  | 119 | 54.2 | Betaine Aldehyde Cation         |
| 84.0822  | 102.092 | -0.0014 | 84.0808  | 213 | 54.2 | Betaine Aldehyde Cation         |
| 186.0588 | 370.196 | 0.0467  | 186.1055 | 58  | 32.2 | Ser-His-Lys                     |
| 186.0588 | 163.084 | 0.0149  | 186.0737 | 140 | 85.2 | N,N-Bis(2-Hydroxyethyl)Glycine  |
| 118.0873 | 117.079 | -0.001  | 118.0863 | 344 | 100  | Betaine                         |
| 118.0873 | 117.079 | -0.001  | 118.0863 | 437 | 56   | Betaine                         |

|          |         |         |          |     |      |                                 |
|----------|---------|---------|----------|-----|------|---------------------------------|
| 118.0873 | 117.079 | -0.001  | 118.0863 | 287 | 62.8 | Betaine                         |
| 118.0873 | 117.079 | -0.001  | 118.0863 | 327 | 46.7 | Betaine                         |
| 106.0872 | 105     | 0       | 106.09   | 210 | 74.1 | Diethanolamine                  |
| 106.0872 | 105     | 0       | 106.09   | 226 | 76.6 | Diethanolamine                  |
| 84.0822  | 102.092 | -0.0014 | 84.0808  | 295 | 50   | Betaine Aldehyde Cation         |
| 84.0822  | 102.092 | -0.0014 | 84.0808  | 242 | 50   | Betaine Aldehyde Cation         |
| 84.0822  | 102.092 | -0.0014 | 84.0808  | 182 | 50   | Betaine Aldehyde Cation         |
| 84.0822  | 102.092 | -0.0014 | 84.0808  | 153 | 53.1 | Betaine Aldehyde Cation         |
| 186.0588 | 163.084 | 0.0149  | 186.0737 | 177 | 100  | N,N-Bis(2-Hydroxyethyl)Glycine  |
| 186.0588 | 163.084 | 0.0149  | 186.0737 | 141 | 88.3 | N,N-Bis(2-Hydroxyethyl)Glycine  |
| 186.0588 | 163.084 | 0.0149  | 186.0737 | 138 | 100  | N,N-Bis(2-Hydroxyethyl)Glycine  |
| 118.0873 | 117.079 | -0.001  | 118.0863 | 367 | 46   | Betaine                         |
| 118.0873 | 117.079 | -0.001  | 118.0863 | 388 | 35.6 | Betaine                         |
| 118.0873 | 117.079 | -0.001  | 118.0863 | 290 | 64.8 | Betaine                         |
| 118.0873 | 117.079 | -0.001  | 118.0863 | 364 | 42.1 | Betaine                         |
| 106.0872 | 105     | 0       | 106.09   | 159 | 76.8 | Diethanolamine                  |
| 106.0872 | 105     | 0       | 106.09   | 225 | 80.4 | Diethanolamine                  |
| 106.0872 | 105     | 0       | 106.09   | 159 | 78.3 | Diethanolamine                  |
| 84.0822  | 102.092 | -0.0014 | 84.0808  | 303 | 54.2 | Betaine Aldehyde Cation         |
| 84.0822  | 102.092 | -0.0014 | 84.0808  | 235 | 52   | Betaine Aldehyde Cation         |
| 84.0822  | 102.092 | -0.0014 | 84.0808  | 142 | 55.4 | Betaine Aldehyde Cation         |
| 148.0974 | 147     | -0.04   | 148.06   | 3   | 100  | O-Acetyl-L-Serine Hydrochloride |
| 148.0974 | 147.053 | -0.037  | 148.0604 | 89  | 83.2 | O-Acetyl-L-Serine               |
| 148.0974 | 147.053 | -0.037  | 148.0604 | 130 | 69.7 | O-Acetyl-L-Serine               |
| 118.0873 | 117.079 | -0.001  | 118.0863 | 349 | 98.5 | Betaine                         |
| 118.0873 | 117.079 | -0.001  | 118.0863 | 320 | 32.2 | Betaine                         |
| 118.0873 | 117.079 | -0.001  | 118.0863 | 389 | 51.3 | Betaine                         |
| 106.0872 | 105     | 0       | 106.09   | 189 | 72.4 | Diethanolamine                  |
| 106.0872 | 105     | 0       | 106.09   | 148 | 78.6 | Diethanolamine                  |
| 106.0872 | 105     | 0       | 106.09   | 155 | 71.7 | Diethanolamine                  |
| 186.0588 | 370.196 | 0.0467  | 186.1055 | 88  | 100  | Ser-His-Lys                     |
| 186.0588 | 163.084 | 0.0149  | 186.0737 | 140 | 100  | N,N-Bis(2-Hydroxyethyl)Glycine  |
| 186.0588 | 370.196 | 0.0467  | 186.1055 | 66  | 100  | Ser-His-Lys                     |
| 186.0588 | 163.084 | 0.0149  | 186.0737 | 135 | 100  | N,N-Bis(2-Hydroxyethyl)Glycine  |
| 97.0774  | 114.104 | 0.0238  | 97.1012  | 36  | 21.9 | Cyclohexanemethanol             |
| 118.0873 | 117.079 | -0.001  | 118.0863 | 280 | 100  | Betaine                         |
| 118.0873 | 117.079 | -0.001  | 118.0863 | 300 | 64.9 | Betaine                         |
| 118.0873 | 117.079 | -0.001  | 118.0863 | 360 | 56.5 | Betaine                         |
| 106.0872 | 105     | 0       | 106.09   | 130 | 72.8 | Diethanolamine                  |
| 106.0872 | 105     | 0       | 106.09   | 236 | 74.9 | Diethanolamine                  |
| 84.0822  | 102.092 | -0.0014 | 84.0808  | 300 | 54.2 | Betaine Aldehyde Cation         |

|          |         |         |          |     |      |                                |
|----------|---------|---------|----------|-----|------|--------------------------------|
| 84.0822  | 102.092 | -0.0014 | 84.0808  | 268 | 50   | Betaine Aldehyde Cation        |
| 84.0822  | 102.092 | -0.0014 | 84.0808  | 112 | 52   | Betaine Aldehyde Cation        |
| 84.0822  | 102.092 | -0.0014 | 84.0808  | 134 | 50   | Betaine Aldehyde Cation        |
| 186.0588 | 163.084 | 0.0149  | 186.0737 | 165 | 76.3 | N,N-Bis(2-Hydroxyethyl)Glycine |
| 118.0873 | 117.079 | -0.001  | 118.0863 | 333 | 100  | Betaine                        |
| 118.0873 | 117.079 | -0.001  | 118.0863 | 415 | 38.8 | Betaine                        |
| 118.0873 | 117.079 | -0.001  | 118.0863 | 265 | 45.7 | Betaine                        |
| 118.0873 | 117.079 | -0.001  | 118.0863 | 411 | 28.8 | Betaine                        |
| 106.0872 | 105     | 0       | 106.09   | 208 | 80.4 | Diethanolamine                 |
| 84.0822  | 102.092 | -0.0014 | 84.0808  | 293 | 51   | Betaine Aldehyde Cation        |
| 84.0822  | 102.092 | -0.0014 | 84.0808  | 296 | 55.4 | Betaine Aldehyde Cation        |
| 84.0822  | 102.092 | -0.0014 | 84.0808  | 202 | 51   | Betaine Aldehyde Cation        |
| 186.0588 | 370.196 | 0.0467  | 186.1055 | 43  | 100  | Ser-His-Lys                    |
| 186.0588 | 163.084 | 0.0149  | 186.0737 | 147 | 100  | N,N-Bis(2-Hydroxyethyl)Glycine |
| 186.0588 | 163.084 | 0.0149  | 186.0737 | 135 | 100  | N,N-Bis(2-Hydroxyethyl)Glycine |
| 106.0872 | 105.079 | -0.0009 | 106.0863 | 119 | 100  | Diethanolamine                 |
| 106.0872 | 105     | 0       | 106.09   | 158 | 75.2 | Diethanolamine                 |
| 106.0872 | 105     | 0       | 106.09   | 221 | 78.6 | Diethanolamine                 |
| 84.0822  | 102.092 | -0.0014 | 84.0808  | 259 | 52   | Betaine Aldehyde Cation        |
| 84.0822  | 102.092 | -0.0014 | 84.0808  | 186 | 50   | Betaine Aldehyde Cation        |
| 84.0822  | 102.092 | -0.0014 | 84.0808  | 145 | 50   | Betaine Aldehyde Cation        |
| 148.0974 | 147     | -0.04   | 148.06   | 12  | 28.7 | N-Acetyl-DL-Serine             |
| 148.0974 | 147.053 | -0.037  | 148.0604 | 125 | 59   | O-Acetyl-L-Serine              |
| 148.0974 | 147.053 | -0.037  | 148.0604 | 90  | 67.3 | O-Acetyl-L-Serine              |
| 118.0873 | 117.079 | -0.001  | 118.0863 | 332 | 28.9 | Betaine                        |
| 118.0873 | 117.079 | -0.001  | 118.0863 | 219 | 100  | Betaine                        |
| 118.0873 | 117.079 | -0.001  | 118.0863 | 309 | 43.3 | Betaine                        |
| 186.0588 | 370.196 | 0.0467  | 186.1055 | 50  | 100  | Ser-His-Lys                    |
| 186.0588 | 370.196 | 0.0467  | 186.1055 | 50  | 100  | Ser-His-Lys                    |
| 186.0588 | 163.084 | 0.0149  | 186.0737 | 159 | 92.7 | N,N-Bis(2-Hydroxyethyl)Glycine |
| 118.0873 | 117.079 | -0.001  | 118.0863 | 251 | 100  | Betaine                        |
| 118.0873 | 117.079 | -0.001  | 118.0863 | 386 | 56.7 | Betaine                        |
| 118.0873 | 117.079 | -0.001  | 118.0863 | 341 | 31.6 | Betaine                        |
| 118.0873 | 117.079 | -0.001  | 118.0863 | 384 | 49.7 | Betaine                        |
| 106.0872 | 105     | 0       | 106.09   | 155 | 78.9 | Diethanolamine                 |
| 106.0872 | 105     | 0       | 106.09   | 169 | 79.3 | Diethanolamine                 |
| 84.0822  | 102.092 | -0.0014 | 84.0808  | 318 | 52   | Betaine Aldehyde Cation        |
| 84.0822  | 102.092 | -0.0014 | 84.0808  | 223 | 51   | Betaine Aldehyde Cation        |
| 84.0822  | 102.092 | -0.0014 | 84.0808  | 198 | 53.1 | Betaine Aldehyde Cation        |
| 186.0588 | 163.084 | 0.0149  | 186.0737 | 114 | 83.5 | N,N-Bis(2-Hydroxyethyl)Glycine |
| 186.0588 | 163.084 | 0.0149  | 186.0737 | 141 | 100  | N,N-Bis(2-Hydroxyethyl)Glycine |



|          |         |         |          |     |      |                                 |
|----------|---------|---------|----------|-----|------|---------------------------------|
| 118.0873 | 117.079 | -0.001  | 118.0863 | 402 | 37.4 | Betaine                         |
| 118.0873 | 117.079 | -0.001  | 118.0863 | 305 | 58.7 | Betaine                         |
| 118.0873 | 117.079 | -0.001  | 118.0863 | 329 | 66.4 | Betaine                         |
| 106.0872 | 105     | 0       | 106.09   | 159 | 74.9 | Diethanolamine                  |
| 106.0872 | 105     | 0       | 106.09   | 159 | 74.8 | Diethanolamine                  |
| 106.0872 | 105     | 0       | 106.09   | 148 | 79.6 | Diethanolamine                  |
| 84.0822  | 102.092 | -0.0014 | 84.0808  | 297 | 54.2 | Betaine Aldehyde Cation         |
| 84.0822  | 102.092 | -0.0014 | 84.0808  | 223 | 52   | Betaine Aldehyde Cation         |
| 84.0822  | 102.092 | -0.0014 | 84.0808  | 115 | 53.1 | Betaine Aldehyde Cation         |
| 186.0588 | 370.196 | 0.0467  | 186.1055 | 74  | 100  | Ser-His-Lys                     |
| 186.0588 | 163.084 | 0.0149  | 186.0737 | 145 | 100  | N,N-Bis(2-Hydroxyethyl)Glycine  |
| 186.0588 | 163.084 | 0.0149  | 186.0737 | 118 | 89.8 | N,N-Bis(2-Hydroxyethyl)Glycine  |
| 97.0774  | 114.104 | 0.0238  | 97.1012  | 31  | 19.4 | Cyclohexanol, 1-Methyl-         |
| 97.0774  | 114.104 | 0.0238  | 97.1012  | 31  | 30.8 | Cyclohexanemethanol             |
| 106.0872 | 105.079 | -0.0009 | 106.0863 | 138 | 100  | Diethanolamine                  |
| 106.0872 | 105     | 0       | 106.09   | 202 | 77.6 | Diethanolamine                  |
| 84.0822  | 102.092 | -0.0014 | 84.0808  | 296 | 51   | Betaine Aldehyde Cation         |
| 84.0822  | 102.092 | -0.0014 | 84.0808  | 244 | 53.1 | Betaine Aldehyde Cation         |
| 84.0822  | 102.092 | -0.0014 | 84.0808  | 225 | 51   | Betaine Aldehyde Cation         |
| 148.0974 | 147     | -0.04   | 148.06   | 47  | 100  | O-Acetyl-L-Serine Hydrochloride |
| 148.0974 | 147.053 | -0.037  | 148.0604 | 222 | 64   | O-Acetyl-L-Serine               |
| 118.0873 | 117.079 | -0.001  | 118.0863 | 348 | 49.7 | Betaine                         |
| 118.0873 | 117.079 | -0.001  | 118.0863 | 300 | 40.4 | Betaine                         |
| 118.0873 | 117.079 | -0.001  | 118.0863 | 325 | 62.3 | Betaine                         |
| 186.0588 | 163.084 | 0.0149  | 186.0737 | 155 | 100  | N,N-Bis(2-Hydroxyethyl)Glycine  |
| 118.0873 | 117.079 | -0.001  | 118.0863 | 394 | 27.4 | Betaine                         |
| 118.0873 | 117.079 | -0.001  | 118.0863 | 333 | 81.4 | Betaine                         |
| 118.0873 | 117.079 | -0.001  | 118.0863 | 362 | 69.9 | Betaine                         |
| 106.0872 | 105     | 0       | 106.09   | 156 | 74.4 | Diethanolamine                  |
| 106.0872 | 105     | 0       | 106.09   | 157 | 78.6 | Diethanolamine                  |
| 84.0822  | 102.092 | -0.0014 | 84.0808  | 287 | 51   | Betaine Aldehyde Cation         |
| 84.0822  | 102.092 | -0.0014 | 84.0808  | 224 | 52   | Betaine Aldehyde Cation         |
| 84.0822  | 102.092 | -0.0014 | 84.0808  | 210 | 52   | Betaine Aldehyde Cation         |
| 186.0588 | 163.084 | 0.0149  | 186.0737 | 127 | 83.1 | N,N-Bis(2-Hydroxyethyl)Glycine  |
| 186.0588 | 370.196 | 0.0467  | 186.1055 | 76  | 100  | Ser-His-Lys                     |
| 97.0774  | 114.104 | 0.0238  | 97.1012  | 47  | 24.6 | Cyclohexanol, 4-Methyl-, Trans- |
| 118.0873 | 117.079 | -0.001  | 118.0863 | 229 | 100  | Betaine                         |
| 118.0873 | 117.079 | -0.001  | 118.0863 | 417 | 64.7 | Betaine                         |
| 118.0873 | 117.079 | -0.001  | 118.0863 | 329 | 36   | Betaine                         |
| 118.0873 | 117.079 | -0.001  | 118.0863 | 341 | 59.3 | Betaine                         |
| 106.0872 | 105     | 0       | 106.09   | 159 | 78.4 | Diethanolamine                  |

|          |         |         |          |     |      |                                 |
|----------|---------|---------|----------|-----|------|---------------------------------|
| 106.0872 | 105     | 0       | 106.09   | 157 | 75.7 | Diethanolamine                  |
| 106.0872 | 105     | 0       | 106.09   | 142 | 77.6 | Diethanolamine                  |
| 84.0822  | 102.092 | -0.0014 | 84.0808  | 300 | 52   | Betaine Aldehyde Cation         |
| 84.0822  | 102.092 | -0.0014 | 84.0808  | 232 | 54.2 | Betaine Aldehyde Cation         |
| 84.0822  | 102.092 | -0.0014 | 84.0808  | 121 | 55.4 | Betaine Aldehyde Cation         |
| 84.0822  | 102.092 | -0.0014 | 84.0808  | 228 | 55.4 | Betaine Aldehyde Cation         |
| 186.0588 | 203.095 | 0.0325  | 186.0913 | 112 | 60.2 | Indole-3-Butyric Acid           |
| 186.0588 | 370.196 | 0.0467  | 186.1055 | 63  | 60.8 | Ser-His-Lys                     |
| 106.0872 | 105     | 0       | 106.09   | 203 | 66   | Diethanolamine                  |
| 106.0872 | 105     | 0       | 106.09   | 182 | 75.1 | Diethanolamine                  |
| 84.0822  | 102.092 | -0.0014 | 84.0808  | 293 | 55.4 | Betaine Aldehyde Cation         |
| 84.0822  | 102.092 | -0.0014 | 84.0808  | 245 | 53.1 | Betaine Aldehyde Cation         |
| 84.0822  | 102.092 | -0.0014 | 84.0808  | 210 | 55.4 | Betaine Aldehyde Cation         |
| 148.0974 | 147     | -0.04   | 148.06   | 26  | 57.9 | N-Acetyl-DL-Serine              |
| 118.0873 | 117.079 | -0.001  | 118.0863 | 431 | 55.1 | Betaine                         |
| 118.0873 | 117.079 | -0.001  | 118.0863 | 289 | 74.3 | Betaine                         |
| 118.0873 | 117.079 | -0.001  | 118.0863 | 325 | 57.9 | Betaine                         |
| 106.0872 | 105     | 0       | 106.09   | 188 | 75.8 | Diethanolamine                  |
| 106.0872 | 105     | 0       | 106.09   | 252 | 77.6 | Diethanolamine                  |
| 84.0822  | 102.092 | -0.0014 | 84.0808  | 307 | 52   | Betaine Aldehyde Cation         |
| 84.0822  | 102.092 | -0.0014 | 84.0808  | 186 | 54.2 | Betaine Aldehyde Cation         |
| 84.0822  | 102.092 | -0.0014 | 84.0808  | 236 | 54.2 | Betaine Aldehyde Cation         |
| 186.0588 | 203.091 | 0.0285  | 186.0873 | 54  | 100  | Ala-Asn                         |
| 186.0588 | 163.084 | 0.0149  | 186.0737 | 166 | 100  | N,N-Bis(2-Hydroxyethyl)Glycine  |
| 148.0974 | 147     | -0.04   | 148.06   | 33  | 100  | O-Acetyl-L-Serine Hydrochloride |
| 148.0974 | 147.053 | -0.037  | 148.0604 | 117 | 74.9 | O-Acetyl-L-Serine               |
| 118.0873 | 117.079 | -0.001  | 118.0863 | 393 | 54.7 | Betaine                         |
| 118.0873 | 117.079 | -0.001  | 118.0863 | 274 | 63.3 | Betaine                         |
| 118.0873 | 117.079 | -0.001  | 118.0863 | 314 | 44.2 | Betaine                         |
| 186.0588 | 370.196 | 0.0467  | 186.1055 | 27  | 100  | Ser-His-Lys                     |
| 186.0588 | 370.196 | 0.0467  | 186.1055 | 76  | 100  | Ser-His-Lys                     |
| 148.0974 | 147.053 | -0.037  | 148.0604 | 123 | 62.3 | O-Acetyl-L-Serine               |
| 118.0873 | 117.079 | -0.001  | 118.0863 | 280 | 95.5 | Betaine                         |
| 118.0873 | 117.079 | -0.001  | 118.0863 | 414 | 54.1 | Betaine                         |
| 118.0873 | 117.079 | -0.001  | 118.0863 | 312 | 73   | Betaine                         |
| 118.0873 | 117.079 | -0.001  | 118.0863 | 271 | 60.3 | Betaine                         |
| 106.0872 | 105     | 0       | 106.09   | 157 | 72.6 | Diethanolamine                  |
| 106.0872 | 105     | 0       | 106.09   | 154 | 74.1 | Diethanolamine                  |
| 106.0872 | 105     | 0       | 106.09   | 158 | 79.6 | Diethanolamine                  |
| 84.0822  | 102.092 | -0.0014 | 84.0808  | 309 | 53.1 | Betaine Aldehyde Cation         |
| 84.0822  | 102.092 | -0.0014 | 84.0808  | 279 | 53.1 | Betaine Aldehyde Cation         |

|          |         |         |          |     |      |                                 |
|----------|---------|---------|----------|-----|------|---------------------------------|
| 84.0822  | 102.092 | -0.0014 | 84.0808  | 244 | 51   | Betaine Aldehyde Cation         |
| 186.0588 | 163.084 | 0.0149  | 186.0737 | 89  | 74.8 | N,N-Bis(2-Hydroxyethyl)Glycine  |
| 97.0774  | 114.104 | 0.0238  | 97.1012  | 42  | 23.6 | Cyclohexanol, 4-Methyl-, Trans- |
| 106.0872 | 105     | 0       | 106.09   | 159 | 74.9 | Diethanolamine                  |
| 84.0822  | 102.092 | -0.0014 | 84.0808  | 278 | 52   | Betaine Aldehyde Cation         |
| 84.0822  | 102.092 | -0.0014 | 84.0808  | 261 | 55.4 | Betaine Aldehyde Cation         |
| 148.0974 | 147.053 | -0.037  | 148.0604 | 120 | 68.7 | O-Acetyl-L-Serine               |
| 148.0974 | 147     | -0.04   | 148.06   | 59  | 100  | O-Acetyl-L-Serine Hydrochloride |
| 118.0873 | 117.079 | -0.001  | 118.0863 | 361 | 45.1 | Betaine                         |
| 118.0873 | 117.079 | -0.001  | 118.0863 | 281 | 61.1 | Betaine                         |
| 118.0873 | 117.079 | -0.001  | 118.0863 | 319 | 54.9 | Betaine                         |
| 186.0588 | 203.091 | 0.0285  | 186.0873 | 83  | 82.7 | Ala-Asn                         |
| 118.0873 | 117.079 | -0.001  | 118.0863 | 260 | 71.2 | Betaine                         |
| 118.0873 | 117.079 | -0.001  | 118.0863 | 293 | 64.4 | Betaine                         |
| 118.0873 | 117.079 | -0.001  | 118.0863 | 318 | 75.5 | Betaine                         |
| 118.0873 | 117.079 | -0.001  | 118.0863 | 323 | 49.9 | Betaine                         |
| 106.0872 | 105     | 0       | 106.09   | 159 | 74.9 | Diethanolamine                  |
| 106.0872 | 105     | 0       | 106.09   | 208 | 74.4 | Diethanolamine                  |
| 106.0872 | 105     | 0       | 106.09   | 303 | 76.9 | Diethanolamine                  |
| 84.0822  | 102.092 | -0.0014 | 84.0808  | 328 | 54.2 | Betaine Aldehyde Cation         |
| 84.0822  | 102.092 | -0.0014 | 84.0808  | 231 | 53.1 | Betaine Aldehyde Cation         |
| 84.0822  | 102.092 | -0.0014 | 84.0808  | 124 | 53.1 | Betaine Aldehyde Cation         |
| 84.0822  | 102.092 | -0.0014 | 84.0808  | 199 | 51   | Betaine Aldehyde Cation         |
| 186.0588 | 370.196 | 0.0467  | 186.1055 | 83  | 100  | Ser-His-Lys                     |
| 186.0588 | 370.196 | 0.0467  | 186.1055 | 35  | 100  | Ser-His-Lys                     |
| 118.0873 | 117.079 | -0.001  | 118.0863 | 259 | 85.3 | Betaine                         |
| 118.0873 | 117.079 | -0.001  | 118.0863 | 403 | 97.4 | Betaine                         |
| 118.0873 | 117.079 | -0.001  | 118.0863 | 292 | 68.4 | Betaine                         |
| 118.0873 | 117.079 | -0.001  | 118.0863 | 407 | 40.4 | Betaine                         |
| 106.0872 | 105     | 0       | 106.09   | 195 | 76.2 | Diethanolamine                  |
| 84.0822  | 102.092 | -0.0014 | 84.0808  | 307 | 52   | Betaine Aldehyde Cation         |
| 84.0822  | 102.092 | -0.0014 | 84.0808  | 251 | 54.2 | Betaine Aldehyde Cation         |
| 84.0822  | 102.092 | -0.0014 | 84.0808  | 229 | 53.1 | Betaine Aldehyde Cation         |
| 186.0588 | 370.196 | 0.0467  | 186.1055 | 39  | 59.3 | Ser-His-Lys                     |
| 186.0588 | 163.084 | 0.0149  | 186.0737 | 133 | 83.3 | N,N-Bis(2-Hydroxyethyl)Glycine  |
| 106.0872 | 105     | 0       | 106.09   | 159 | 73.9 | Diethanolamine                  |
| 106.0872 | 105     | 0       | 106.09   | 158 | 74.8 | Diethanolamine                  |
| 106.0872 | 105.079 | -0.0009 | 106.0863 | 118 | 100  | Diethanolamine                  |
| 84.0822  | 102.092 | -0.0014 | 84.0808  | 292 | 51   | Betaine Aldehyde Cation         |
| 84.0822  | 102.092 | -0.0014 | 84.0808  | 239 | 51   | Betaine Aldehyde Cation         |
| 84.0822  | 102.092 | -0.0014 | 84.0808  | 146 | 56   | Betaine Aldehyde Cation         |

|          |         |         |          |     |      |                                 |
|----------|---------|---------|----------|-----|------|---------------------------------|
| 148.0974 | 147     | -0.04   | 148.06   | 28  | 100  | O-Acetyl-L-Serine Hydrochloride |
| 118.0873 | 117.079 | -0.001  | 118.0863 | 378 | 100  | Betaine                         |
| 118.0873 | 117.079 | -0.001  | 118.0863 | 301 | 67.3 | Betaine                         |
| 118.0873 | 117.079 | -0.001  | 118.0863 | 356 | 38.2 | Betaine                         |
| 106.0872 | 105     | 0       | 106.09   | 158 | 80.9 | Diethanolamine                  |
| 106.0872 | 105     | 0       | 106.09   | 212 | 77.7 | Diethanolamine                  |
| 84.0822  | 102.092 | -0.0014 | 84.0808  | 267 | 51   | Betaine Aldehyde Cation         |
| 84.0822  | 102.092 | -0.0014 | 84.0808  | 266 | 52   | Betaine Aldehyde Cation         |
| 84.0822  | 102.092 | -0.0014 | 84.0808  | 161 | 52   | Betaine Aldehyde Cation         |
| 84.0822  | 102.092 | -0.0014 | 84.0808  | 157 | 54.2 | Betaine Aldehyde Cation         |
| 186.0588 | 163.084 | 0.0149  | 186.0737 | 173 | 95.7 | N,N-Bis(2-Hydroxyethyl)Glycine  |
| 186.0588 | 163.084 | 0.0149  | 186.0737 | 148 | 100  | N,N-Bis(2-Hydroxyethyl)Glycine  |
| 186.0588 | 163.084 | 0.0149  | 186.0737 | 154 | 100  | N,N-Bis(2-Hydroxyethyl)Glycine  |
| 118.0873 | 117.079 | -0.001  | 118.0863 | 342 | 56.5 | Betaine                         |
| 118.0873 | 117.079 | -0.001  | 118.0863 | 292 | 64.5 | Betaine                         |
| 118.0873 | 117.079 | -0.001  | 118.0863 | 390 | 37.8 | Betaine                         |
| 84.0822  | 102.092 | -0.0014 | 84.0808  | 297 | 53.1 | Betaine Aldehyde Cation         |
| 84.0822  | 102.092 | -0.0014 | 84.0808  | 252 | 53.1 | Betaine Aldehyde Cation         |
| 84.0822  | 102.092 | -0.0014 | 84.0808  | 217 | 52   | Betaine Aldehyde Cation         |
| 186.0588 | 370.196 | 0.0467  | 186.1055 | 30  | 100  | Ser-His-Lys                     |
| 148.0974 | 147.053 | -0.037  | 148.0604 | 94  | 59.4 | O-Acetyl-L-Serine               |
| 97.0774  | 114.104 | 0.0238  | 97.1012  | 27  | 26.4 | Cyclohexanemethanol             |
| 118.0873 | 117.079 | -0.001  | 118.0863 | 352 | 99   | Betaine                         |
| 118.0873 | 117.079 | -0.001  | 118.0863 | 312 | 98.6 | Betaine                         |
| 118.0873 | 117.079 | -0.001  | 118.0863 | 347 | 44.6 | Betaine                         |
| 106.0872 | 105     | 0       | 106.09   | 191 | 71.7 | Diethanolamine                  |
| 106.0872 | 105     | 0       | 106.09   | 173 | 78.8 | Diethanolamine                  |
| 106.0872 | 105.079 | -0.0009 | 106.0863 | 217 | 100  | Diethanolamine                  |
| 84.0822  | 102.092 | -0.0014 | 84.0808  | 300 | 53.1 | Betaine Aldehyde Cation         |
| 84.0822  | 102.092 | -0.0014 | 84.0808  | 253 | 53.1 | Betaine Aldehyde Cation         |
| 84.0822  | 102.092 | -0.0014 | 84.0808  | 167 | 56   | Betaine Aldehyde Cation         |
| 186.0588 | 163.084 | 0.0149  | 186.0737 | 149 | 41.4 | N,N-Bis(2-Hydroxyethyl)Glycine  |
| 186.0588 | 163.084 | 0.0149  | 186.0737 | 180 | 100  | N,N-Bis(2-Hydroxyethyl)Glycine  |
| 106.0872 | 105     | 0       | 106.09   | 230 | 61.9 | Diethanolamine                  |
| 106.0872 | 105     | 0       | 106.09   | 262 | 64.7 | Diethanolamine                  |
| 84.0822  | 102.092 | -0.0014 | 84.0808  | 302 | 50   | Betaine Aldehyde Cation         |
| 84.0822  | 102.092 | -0.0014 | 84.0808  | 238 | 51   | Betaine Aldehyde Cation         |
| 84.0822  | 102.092 | -0.0014 | 84.0808  | 120 | 52   | Betaine Aldehyde Cation         |
| 84.0822  | 102.092 | -0.0014 | 84.0808  | 171 | 54.2 | Betaine Aldehyde Cation         |
| 148.0974 | 147     | -0.04   | 148.06   | 28  | 30.3 | N-Acetyl-DL-Serine              |
| 148.0974 | 147.053 | -0.037  | 148.0604 | 108 | 76.6 | O-Acetyl-L-Serine               |

|          |         |         |          |     |      |                                       |
|----------|---------|---------|----------|-----|------|---------------------------------------|
| 118.0873 | 117.079 | -0.001  | 118.0863 | 224 | 100  | Betaine                               |
| 118.0873 | 117.079 | -0.001  | 118.0863 | 417 | 40.4 | Betaine                               |
| 118.0873 | 117.079 | -0.001  | 118.0863 | 326 | 59.1 | Betaine                               |
| 118.0873 | 117.079 | -0.001  | 118.0863 | 323 | 38   | Betaine                               |
| 106.0872 | 105     | 0       | 106.09   | 133 | 73.3 | Diethanolamine                        |
| 106.0872 | 105     | 0       | 106.09   | 156 | 74.4 | Diethanolamine                        |
| 84.0822  | 102.092 | -0.0014 | 84.0808  | 297 | 50   | Betaine Aldehyde Cation               |
| 84.0822  | 102.092 | -0.0014 | 84.0808  | 216 | 51   | Betaine Aldehyde Cation               |
| 84.0822  | 102.092 | -0.0014 | 84.0808  | 192 | 53.1 | Betaine Aldehyde Cation               |
| 186.0588 | 163.084 | 0.0149  | 186.0737 | 173 | 100  | N,N-Bis(2-Hydroxyethyl)Glycine        |
| 186.0588 | 163.084 | 0.0149  | 186.0737 | 140 | 100  | N,N-Bis(2-Hydroxyethyl)Glycine        |
| 186.0588 | 163.084 | 0.0149  | 186.0737 | 163 | 89.5 | N,N-Bis(2-Hydroxyethyl)Glycine        |
| 118.0873 | 117.079 | -0.001  | 118.0863 | 410 | 40   | Betaine                               |
| 118.0873 | 117.079 | -0.001  | 118.0863 | 258 | 82.8 | Betaine                               |
| 118.0873 | 117.079 | -0.001  | 118.0863 | 398 | 52.8 | Betaine                               |
| 106.0872 | 105     | 0       | 106.09   | 151 | 74.3 | Diethanolamine                        |
| 106.0872 | 105.079 | -0.0009 | 106.0863 | 195 | 100  | Diethanolamine                        |
| 186.0588 | 370.196 | 0.0467  | 186.1055 | 36  | 100  | Ser-His-Lys                           |
| 186.0588 | 370.196 | 0.0467  | 186.1055 | 52  | 100  | Ser-His-Lys                           |
| 186.0588 | 370.196 | 0.0467  | 186.1055 | 70  | 100  | Ser-His-Lys                           |
| 97.0774  | 114.104 | 0.0238  | 97.1012  | 8   | 100  | Cyclopentanemethanol, .Alpha.-Methyl- |
| 118.0873 | 117.079 | -0.001  | 118.0863 | 354 | 66.2 | Betaine                               |
| 118.0873 | 117.079 | -0.001  | 118.0863 | 331 | 96.8 | Betaine                               |
| 118.0873 | 117.079 | -0.001  | 118.0863 | 376 | 33.3 | Betaine                               |
| 106.0872 | 105     | 0       | 106.09   | 176 | 74.7 | Diethanolamine                        |
| 106.0872 | 105     | 0       | 106.09   | 159 | 79.6 | Diethanolamine                        |
| 106.0872 | 105.079 | -0.0009 | 106.0863 | 166 | 100  | Diethanolamine                        |
| 84.0822  | 102.092 | -0.0014 | 84.0808  | 299 | 50   | Betaine Aldehyde Cation               |
| 84.0822  | 102.092 | -0.0014 | 84.0808  | 279 | 50   | Betaine Aldehyde Cation               |
| 84.0822  | 102.092 | -0.0014 | 84.0808  | 206 | 56.6 | Betaine Aldehyde Cation               |
| 186.0588 | 370.196 | 0.0467  | 186.1055 | 55  | 100  | Ser-His-Lys                           |
| 186.0588 | 163.084 | 0.0149  | 186.0737 | 144 | 100  | N,N-Bis(2-Hydroxyethyl)Glycine        |
| 148.0974 | 147     | -0.04   | 148.06   | 34  | 100  | O-Acetyl-L-Serine Hydrochloride       |
| 148.0974 | 147     | -0.04   | 148.06   | 63  | 59.3 | O-Acetyl-L-Serine Hydrochloride       |
| 148.0974 | 147.053 | -0.037  | 148.0604 | 136 | 100  | O-Acetyl-L-Serine                     |
| 97.0774  | 114.104 | 0.0238  | 97.1012  | 36  | 24.5 | Cyclohexanemethanol                   |
| 106.0872 | 105     | 0       | 106.09   | 155 | 77.6 | Diethanolamine                        |
| 84.0822  | 102.092 | -0.0014 | 84.0808  | 276 | 50   | Betaine Aldehyde Cation               |
| 84.0822  | 102.092 | -0.0014 | 84.0808  | 238 | 52   | Betaine Aldehyde Cation               |
| 84.0822  | 102.092 | -0.0014 | 84.0808  | 184 | 53.1 | Betaine Aldehyde Cation               |
| 148.0974 | 147     | -0.04   | 148.06   | 37  | 100  | O-Acetyl-L-Serine Hydrochloride       |

|          |         |         |          |     |      |                                          |
|----------|---------|---------|----------|-----|------|------------------------------------------|
| 822.7532 | 822     | 0       | 822.75   | 332 | 82.7 | TG 48:1; [M+NH4]+;<br>TG(16:0/16:0/16:1) |
| 822.7532 | 822     | 0       | 822.75   | 342 | 80.6 | TG 48:1; [M+NH4]+;<br>TG(16:0/16:0/16:1) |
| 822.7532 | 822     | 0       | 822.75   | 280 | 56   | TG 48:1; [M+NH4]+;<br>TG(16:0/16:0/16:1) |
| 822.7532 | 822     | 0       | 822.75   | 277 | 100  | TG 48:1; [M+NH4]+;<br>TG(16:0/16:0/16:1) |
| 97.0774  | 114.104 | 0.0238  | 97.1012  | 30  | 32.3 | Cyclohexanol, 1-Methyl-                  |
| 118.0873 | 117.079 | -0.001  | 118.0863 | 238 | 100  | Betaine                                  |
| 118.0873 | 117.079 | -0.001  | 118.0863 | 411 | 33.9 | Betaine                                  |
| 118.0873 | 117.079 | -0.001  | 118.0863 | 270 | 60.3 | Betaine                                  |
| 118.0873 | 117.079 | -0.001  | 118.0863 | 335 | 48.5 | Betaine                                  |
| 106.0872 | 105     | 0       | 106.09   | 156 | 73.7 | Diethanolamine                           |
| 106.0872 | 105     | 0       | 106.09   | 158 | 80.2 | Diethanolamine                           |
| 106.0872 | 105     | 0       | 106.09   | 245 | 73.2 | Diethanolamine                           |
| 84.0822  | 102.092 | -0.0014 | 84.0808  | 288 | 54.2 | Betaine Aldehyde Cation                  |
| 84.0822  | 102.092 | -0.0014 | 84.0808  | 261 | 54.2 | Betaine Aldehyde Cation                  |
| 84.0822  | 102.092 | -0.0014 | 84.0808  | 140 | 53.1 | Betaine Aldehyde Cation                  |
| 186.0588 | 163.084 | 0.0149  | 186.0737 | 118 | 87.8 | N,N-Bis(2-Hydroxyethyl)Glycine           |
| 186.0588 | 163.084 | 0.0149  | 186.0737 | 141 | 100  | N,N-Bis(2-Hydroxyethyl)Glycine           |
| 97.0774  | 114.104 | 0.0238  | 97.1012  | 51  | 24   | Cyclohexanol, 1-Methyl-                  |
| 118.0873 | 117.079 | -0.001  | 118.0863 | 260 | 79.5 | Betaine                                  |
| 118.0873 | 117.079 | -0.001  | 118.0863 | 351 | 32.3 | Betaine                                  |
| 118.0873 | 117.079 | -0.001  | 118.0863 | 266 | 80.8 | Betaine                                  |
| 118.0873 | 117     | 0       | 118.09   | 358 | 24.3 | Betaine                                  |
| 106.0872 | 105     | 0       | 106.09   | 133 | 78.2 | Diethanolamine                           |
| 106.0872 | 105     | 0       | 106.09   | 177 | 72.7 | Diethanolamine                           |
| 186.0588 | 163.084 | 0.0149  | 186.0737 | 172 | 83.3 | N,N-Bis(2-Hydroxyethyl)Glycine           |
| 186.0588 | 163.084 | 0.0149  | 186.0737 | 107 | 100  | N,N-Bis(2-Hydroxyethyl)Glycine           |
| 186.0588 | 163.084 | 0.0149  | 186.0737 | 117 | 88.3 | N,N-Bis(2-Hydroxyethyl)Glycine           |
| 148.0974 | 147.053 | -0.037  | 148.0604 | 147 | 71   | O-Acetyl-L-Serine                        |
| 148.0974 | 147.053 | -0.037  | 148.0604 | 122 | 100  | O-Acetyl-L-Serine                        |
| 118.0873 | 117.079 | -0.001  | 118.0863 | 416 | 32.2 | Betaine                                  |
| 118.0873 | 117.079 | -0.001  | 118.0863 | 270 | 27.8 | Betaine                                  |
| 118.0873 | 117.079 | -0.001  | 118.0863 | 336 | 39.3 | Betaine                                  |
| 106.0872 | 105     | 0       | 106.09   | 159 | 74   | Diethanolamine                           |
| 106.0872 | 105     | 0       | 106.09   | 155 | 79.3 | Diethanolamine                           |
| 84.0822  | 102.092 | -0.0014 | 84.0808  | 303 | 53.1 | Betaine Aldehyde Cation                  |
| 84.0822  | 102.092 | -0.0014 | 84.0808  | 267 | 55.4 | Betaine Aldehyde Cation                  |
| 84.0822  | 102.092 | -0.0014 | 84.0808  | 150 | 52   | Betaine Aldehyde Cation                  |
| 186.0588 | 163.084 | 0.0149  | 186.0737 | 140 | 90.4 | N,N-Bis(2-Hydroxyethyl)Glycine           |
| 106.0872 | 105     | 0       | 106.09   | 161 | 77.9 | Diethanolamine                           |

|          |         |         |          |     |      |                                           |
|----------|---------|---------|----------|-----|------|-------------------------------------------|
| 84.0822  | 102.092 | -0.0014 | 84.0808  | 274 | 51   | Betaine Aldehyde Cation                   |
| 84.0822  | 102.092 | -0.0014 | 84.0808  | 216 | 52   | Betaine Aldehyde Cation                   |
| 84.0822  | 102.092 | -0.0014 | 84.0808  | 148 | 54.2 | Betaine Aldehyde Cation                   |
| 148.0974 | 147.053 | -0.037  | 148.0604 | 20  | 37.1 | O-Acetyl-L-Serine                         |
| 148.0974 | 147.053 | -0.037  | 148.0604 | 123 | 70.2 | O-Acetyl-L-Serine                         |
| 97.0774  | 114.104 | 0.0238  | 97.1012  | 41  | 100  | Cyclohexanol, 4-Methyl-, Trans-           |
| 118.0873 | 117.079 | -0.001  | 118.0863 | 335 | 68.9 | Betaine                                   |
| 118.0873 | 117.079 | -0.001  | 118.0863 | 431 | 57.5 | Betaine                                   |
| 118.0873 | 117.079 | -0.001  | 118.0863 | 300 | 43.9 | Betaine                                   |
| 118.0873 | 117     | 0       | 118.09   | 323 | 28.9 | Betaine                                   |
| 106.0872 | 105     | 0       | 106.09   | 158 | 76.3 | Diethanolamine                            |
| 106.0872 | 105     | 0       | 106.09   | 159 | 79.6 | Diethanolamine                            |
| 106.0872 | 105     | 0       | 106.09   | 218 | 52.8 | Diethanolamine                            |
| 106.0872 | 105     | 0       | 106.09   | 159 | 76.8 | Diethanolamine                            |
| 84.0822  | 102.092 | -0.0014 | 84.0808  | 306 | 52   | Betaine Aldehyde Cation                   |
| 84.0822  | 102.092 | -0.0014 | 84.0808  | 244 | 55.4 | Betaine Aldehyde Cation                   |
| 84.0822  | 102.092 | -0.0014 | 84.0808  | 182 | 51   | Betaine Aldehyde Cation                   |
| 186.0588 | 163.084 | 0.0149  | 186.0737 | 117 | 83   | N,N-Bis(2-Hydroxyethyl)Glycine            |
| 186.0588 | 163.084 | 0.0149  | 186.0737 | 136 | 100  | N,N-Bis(2-Hydroxyethyl)Glycine            |
| 118.0873 | 117.079 | -0.001  | 118.0863 | 229 | 80.1 | Betaine                                   |
| 118.0873 | 117.079 | -0.001  | 118.0863 | 308 | 24.9 | Betaine                                   |
| 118.0873 | 117.079 | -0.001  | 118.0863 | 262 | 48.9 | Betaine                                   |
| 118.0873 | 117.079 | -0.001  | 118.0863 | 346 | 24.6 | Betaine                                   |
| 148.0974 | 147.053 | -0.037  | 148.0604 | 155 | 63.5 | O-Acetyl-L-Serine                         |
| 148.0974 | 147.053 | -0.037  | 148.0604 | 124 | 100  | O-Acetyl-L-Serine                         |
| 371.2885 | 370.308 | 0.0271  | 371.3156 | 198 | 100  | Hexanedioic Acid, Bis(2-Ethylhexyl) Ester |
| 371.2885 | 370.308 | 0.0271  | 371.3156 | 165 | 88.8 | Hexanedioic Acid, Bis(2-Ethylhexyl) Ester |
| 371.2885 | 370.308 | 0.0271  | 371.3156 | 144 | 81.9 | Hexanedioic Acid, Bis(2-Ethylhexyl) Ester |
| 118.0873 | 117.079 | -0.001  | 118.0863 | 252 | 49.9 | Betaine                                   |
| 118.0873 | 117.079 | -0.001  | 118.0863 | 313 | 30.9 | Betaine                                   |
| 106.0872 | 105     | 0       | 106.09   | 154 | 75.9 | Diethanolamine                            |
| 106.0872 | 105     | 0       | 106.09   | 224 | 80.4 | Diethanolamine                            |
| 84.0822  | 102.092 | -0.0014 | 84.0808  | 298 | 53.1 | Betaine Aldehyde Cation                   |
| 84.0822  | 102.092 | -0.0014 | 84.0808  | 223 | 50   | Betaine Aldehyde Cation                   |
| 84.0822  | 102.092 | -0.0014 | 84.0808  | 159 | 55.4 | Betaine Aldehyde Cation                   |
| 84.0822  | 102.092 | -0.0014 | 84.0808  | 183 | 54.2 | Betaine Aldehyde Cation                   |
| 186.0588 | 163.084 | 0.0149  | 186.0737 | 137 | 100  | N,N-Bis(2-Hydroxyethyl)Glycine            |
| 186.0588 | 370.196 | 0.0467  | 186.1055 | 56  | 100  | Ser-His-Lys                               |
| 170.0793 | 187.121 | 0.0383  | 170.1176 | 89  | 54.2 | 7-Keto-8-Aminopelargonic Acid             |

|          |         |         |          |     |      |                                          |
|----------|---------|---------|----------|-----|------|------------------------------------------|
| 148.0974 | 147     | -0.04   | 148.06   | 26  | 33.9 | O-Acetyl-L-Serine Hydrochloride          |
| 148.0974 | 147     | -0.04   | 148.06   | 3   | 100  | O-Acetyl-L-Serine Hydrochloride          |
| 106.0872 | 105     | 0       | 106.09   | 171 | 75.1 | Diethanolamine                           |
| 106.0872 | 105     | 0       | 106.09   | 245 | 61.9 | Diethanolamine                           |
| 106.0872 | 105.079 | -0.0009 | 106.0863 | 109 | 100  | Diethanolamine                           |
| 84.0822  | 102.092 | -0.0014 | 84.0808  | 272 | 52   | Betaine Aldehyde Cation                  |
| 84.0822  | 102.092 | -0.0014 | 84.0808  | 214 | 52   | Betaine Aldehyde Cation                  |
| 84.0822  | 102.092 | -0.0014 | 84.0808  | 124 | 54.2 | Betaine Aldehyde Cation                  |
| 824.7703 | 824     | 0       | 824.77   | 250 | 73.2 | TG 48:0; [M+NH4]+;<br>TG(14:0/16:0/18:0) |
| 824.7703 | 824     | 0       | 824.77   | 260 | 50   | TG 48:0; [M+NH4]+;<br>TG(14:0/16:0/18:0) |
| 824.7703 | 824     | 0       | 824.77   | 235 | 74.9 | TG 48:0; [M+NH4]+;<br>TG(16:0/16:0/16:0) |
| 824.7703 | 824     | 0       | 824.77   | 262 | 52   | TG 48:0; [M+NH4]+;<br>TG(16:0/16:0/16:0) |
| 118.0873 | 117.079 | -0.001  | 118.0863 | 332 | 41.8 | Betaine                                  |
| 118.0873 | 117.079 | -0.001  | 118.0863 | 387 | 28.1 | Betaine                                  |
| 118.0873 | 117.079 | -0.001  | 118.0863 | 250 | 56   | Betaine                                  |
| 118.0873 | 117.079 | -0.001  | 118.0863 | 305 | 34.3 | Betaine                                  |
| 106.0872 | 105     | 0       | 106.09   | 159 | 80.2 | Diethanolamine                           |
| 106.0872 | 105     | 0       | 106.09   | 147 | 72.9 | Diethanolamine                           |
| 106.0872 | 105     | 0       | 106.09   | 151 | 77.6 | Diethanolamine                           |
| 84.0822  | 102.092 | -0.0014 | 84.0808  | 282 | 52   | Betaine Aldehyde Cation                  |
| 84.0822  | 102.092 | -0.0014 | 84.0808  | 277 | 50   | Betaine Aldehyde Cation                  |
| 84.0822  | 102.092 | -0.0014 | 84.0808  | 220 | 51   | Betaine Aldehyde Cation                  |
| 186.0588 | 163.084 | 0.0149  | 186.0737 | 139 | 100  | N,N-Bis(2-Hydroxyethyl)Glycine           |
| 186.0588 | 370.196 | 0.0467  | 186.1055 | 68  | 100  | Ser-His-Lys                              |
| 186.0588 | 163.084 | 0.0149  | 186.0737 | 142 | 91.7 | N,N-Bis(2-Hydroxyethyl)Glycine           |
| 824.7703 | 824     | 0       | 824.77   | 311 | 85.4 | TG 48:0; [M+NH4]+;<br>TG(14:0/16:0/18:0) |
| 824.7703 | 824     | 0       | 824.77   | 98  | 100  | TG 48:0; [M+NH4]+;<br>TG(14:0/16:0/18:0) |
| 97.0774  | 114.104 | 0.0238  | 97.1012  | 65  | 25.2 | Cyclohexanol, 4-Methyl-, Trans-          |
| 118.0873 | 117.079 | -0.001  | 118.0863 | 277 | 100  | Betaine                                  |
| 118.0873 | 117.079 | -0.001  | 118.0863 | 398 | 62.9 | Betaine                                  |
| 118.0873 | 117.079 | -0.001  | 118.0863 | 302 | 72.8 | Betaine                                  |
| 118.0873 | 117.079 | -0.001  | 118.0863 | 371 | 53.1 | Betaine                                  |
| 106.0872 | 105     | 0       | 106.09   | 160 | 75.2 | Diethanolamine                           |
| 106.0872 | 105     | 0       | 106.09   | 156 | 74.4 | Diethanolamine                           |
| 106.0872 | 105     | 0       | 106.09   | 170 | 80.7 | Diethanolamine                           |
| 186.0588 | 163.084 | 0.0149  | 186.0737 | 145 | 100  | N,N-Bis(2-Hydroxyethyl)Glycine           |
| 186.0588 | 163.084 | 0.0149  | 186.0737 | 128 | 100  | N,N-Bis(2-Hydroxyethyl)Glycine           |



|          |         |         |          |     |      |                                          |
|----------|---------|---------|----------|-----|------|------------------------------------------|
| 876.8011 | 876     | 0       | 876.8    | 294 | 100  | TG 52:2; [M+NH4]+;<br>TG(16:0/18:1/18:1) |
| 876.8011 | 876     | 0       | 876.8    | 310 | 86.6 | TG 52:2; [M+NH4]+;<br>TG(16:0/18:1/18:1) |
| 876.8011 | 876     | 0       | 876.8    | 233 | 57.9 | TG 52:2; [M+NH4]+;<br>TG(16:0/18:1/18:1) |
| 876.8011 | 876     | 0       | 876.8    | 306 | 90.4 | TG 52:2; [M+NH4]+;<br>TG(16:0/18:1/18:1) |
| 118.0873 | 117.079 | -0.001  | 118.0863 | 333 | 29.8 | Betaine                                  |
| 118.0873 | 117.079 | -0.001  | 118.0863 | 275 | 58.7 | Betaine                                  |
| 118.0873 | 117.079 | -0.001  | 118.0863 | 324 | 38.4 | Betaine                                  |
| 84.0822  | 102.092 | -0.0014 | 84.0808  | 259 | 51   | Betaine Aldehyde Cation                  |
| 84.0822  | 102.092 | -0.0014 | 84.0808  | 229 | 50   | Betaine Aldehyde Cation                  |
| 84.0822  | 102.092 | -0.0014 | 84.0808  | 130 | 51   | Betaine Aldehyde Cation                  |
| 84.0822  | 102.092 | -0.0014 | 84.0808  | 133 | 56   | Betaine Aldehyde Cation                  |
| 186.0588 | 203.091 | 0.0285  | 186.0873 | 49  | 100  | Ala-Asn                                  |
| 186.0588 | 370.196 | 0.0467  | 186.1055 | 58  | 100  | Ser-His-Lys                              |
| 148.0974 | 147     | -0.04   | 148.06   | 10  | 100  | O-Acetyl-L-Serine Hydrochloride          |
| 148.0974 | 147.053 | -0.037  | 148.0604 | 122 | 100  | O-Acetyl-L-Serine                        |
| 97.0774  | 114.104 | 0.0238  | 97.1012  | 26  | 28.9 | Cyclohexanemethanol                      |
| 106.0872 | 105     | 0       | 106.09   | 190 | 67.3 | Diethanolamine                           |
| 84.0822  | 102.092 | -0.0014 | 84.0808  | 298 | 51   | Betaine Aldehyde Cation                  |
| 84.0822  | 102.092 | -0.0014 | 84.0808  | 242 | 54.2 | Betaine Aldehyde Cation                  |
| 84.0822  | 102.092 | -0.0014 | 84.0808  | 202 | 52   | Betaine Aldehyde Cation                  |
| 148.0974 | 147.053 | -0.037  | 148.0604 | 120 | 73.2 | O-Acetyl-L-Serine                        |
| 97.0774  | 114.104 | 0.0238  | 97.1012  | 39  | 30.9 | Cyclohexanemethanol                      |
| 118.0873 | 117.079 | -0.001  | 118.0863 | 302 | 38.3 | Betaine                                  |
| 118.0873 | 117.079 | -0.001  | 118.0863 | 358 | 60.1 | Betaine                                  |
| 118.0873 | 117.079 | -0.001  | 118.0863 | 323 | 78   | Betaine                                  |
| 118.0873 | 117.079 | -0.001  | 118.0863 | 293 | 65.5 | Betaine                                  |
| 106.0872 | 105     | 0       | 106.09   | 158 | 80.2 | Diethanolamine                           |
| 106.0872 | 105     | 0       | 106.09   | 159 | 74.3 | Diethanolamine                           |
| 84.0822  | 102.092 | -0.0014 | 84.0808  | 310 | 52   | Betaine Aldehyde Cation                  |
| 84.0822  | 102.092 | -0.0014 | 84.0808  | 287 | 50   | Betaine Aldehyde Cation                  |
| 84.0822  | 102.092 | -0.0014 | 84.0808  | 193 | 51   | Betaine Aldehyde Cation                  |
| 84.0822  | 102.092 | -0.0014 | 84.0808  | 143 | 51   | Betaine Aldehyde Cation                  |
| 186.0588 | 370.196 | 0.0467  | 186.1055 | 31  | 100  | Ser-His-Lys                              |
| 186.0588 | 163.084 | 0.0149  | 186.0737 | 176 | 100  | N,N-Bis(2-Hydroxyethyl)Glycine           |
| 186.0588 | 163.084 | 0.0149  | 186.0737 | 155 | 88.9 | N,N-Bis(2-Hydroxyethyl)Glycine           |
| 170.0793 | 187.121 | 0.0383  | 170.1176 | 26  | 100  | 7-Keto-8-Aminopelargonic Acid            |
| 97.0774  | 114.104 | 0.0238  | 97.1012  | 28  | 24   | Cyclohexanol, 1-Methyl-                  |
| 118.0873 | 117.079 | -0.001  | 118.0863 | 249 | 100  | Betaine                                  |
| 118.0873 | 117.079 | -0.001  | 118.0863 | 402 | 66.2 | Betaine                                  |

|          |         |         |          |     |      |                                 |
|----------|---------|---------|----------|-----|------|---------------------------------|
| 118.0873 | 117.079 | -0.001  | 118.0863 | 289 | 65.4 | Betaine                         |
| 118.0873 | 117.079 | -0.001  | 118.0863 | 300 | 67.6 | Betaine                         |
| 106.0872 | 105     | 0       | 106.09   | 158 | 79.3 | Diethanolamine                  |
| 106.0872 | 105     | 0       | 106.09   | 156 | 75.1 | Diethanolamine                  |
| 106.0872 | 105     | 0       | 106.09   | 156 | 60.8 | Diethanolamine                  |
| 186.0588 | 203.091 | 0.0285  | 186.0873 | 78  | 100  | Ala-Asn                         |
| 186.0588 | 163.084 | 0.0149  | 186.0737 | 131 | 100  | N,N-Bis(2-Hydroxyethyl)Glycine  |
| 186.0588 | 370.196 | 0.0467  | 186.1055 | 61  | 100  | Ser-His-Lys                     |
| 186.0588 | 163.084 | 0.0149  | 186.0737 | 155 | 100  | N,N-Bis(2-Hydroxyethyl)Glycine  |
| 148.0974 | 147     | -0.04   | 148.06   | 6   | 100  | O-Acetyl-L-Serine Hydrochloride |
| 148.0974 | 147.053 | -0.037  | 148.0604 | 148 | 100  | O-Acetyl-L-Serine               |
| 118.0873 | 117.079 | -0.001  | 118.0863 | 339 | 30.3 | Betaine                         |
| 118.0873 | 117.079 | -0.001  | 118.0863 | 272 | 50.4 | Betaine                         |
| 118.0873 | 117.079 | -0.001  | 118.0863 | 325 | 32.8 | Betaine                         |
| 84.0822  | 102.092 | -0.0014 | 84.0808  | 251 | 51   | Betaine Aldehyde Cation         |
| 84.0822  | 102.092 | -0.0014 | 84.0808  | 207 | 54.2 | Betaine Aldehyde Cation         |
| 84.0822  | 102.092 | -0.0014 | 84.0808  | 176 | 52   | Betaine Aldehyde Cation         |
| 186.0588 | 370.196 | 0.0467  | 186.1055 | 46  | 35.9 | Ser-His-Lys                     |
| 186.0588 | 370.196 | 0.0467  | 186.1055 | 83  | 100  | Ser-His-Lys                     |
| 97.0774  | 114.104 | 0.0238  | 97.1012  | 24  | 55.4 | Cyclohexanemethanol             |
| 106.0872 | 105     | 0       | 106.09   | 156 | 78.2 | Diethanolamine                  |
| 106.0872 | 105     | 0       | 106.09   | 159 | 75.8 | Diethanolamine                  |
| 84.0822  | 102.092 | -0.0014 | 84.0808  | 276 | 50   | Betaine Aldehyde Cation         |
| 84.0822  | 102.092 | -0.0014 | 84.0808  | 265 | 51   | Betaine Aldehyde Cation         |
| 118.0873 | 117.079 | -0.001  | 118.0863 | 415 | 93.2 | Betaine                         |
| 118.0873 | 117.079 | -0.001  | 118.0863 | 327 | 33.7 | Betaine                         |
| 118.0873 | 117.079 | -0.001  | 118.0863 | 308 | 58.5 | Betaine                         |
| 106.0872 | 105     | 0       | 106.09   | 149 | 74.5 | Diethanolamine                  |
| 106.0872 | 105     | 0       | 106.09   | 235 | 77.3 | Diethanolamine                  |
| 106.0872 | 105     | 0       | 106.09   | 159 | 76.8 | Diethanolamine                  |
| 84.0822  | 102.092 | -0.0014 | 84.0808  | 299 | 50   | Betaine Aldehyde Cation         |
| 84.0822  | 102.092 | -0.0014 | 84.0808  | 267 | 52   | Betaine Aldehyde Cation         |
| 84.0822  | 102.092 | -0.0014 | 84.0808  | 221 | 56.6 | Betaine Aldehyde Cation         |
| 186.0588 | 163.084 | 0.0149  | 186.0737 | 184 | 90.9 | N,N-Bis(2-Hydroxyethyl)Glycine  |
| 186.0588 | 163.084 | 0.0149  | 186.0737 | 172 | 100  | N,N-Bis(2-Hydroxyethyl)Glycine  |
| 186.0588 | 163.084 | 0.0149  | 186.0737 | 141 | 100  | N,N-Bis(2-Hydroxyethyl)Glycine  |
| 97.0774  | 114.104 | 0.0238  | 97.1012  | 33  | 20.3 | Cyclohexanol, 1-Methyl-         |
| 118.0873 | 117.079 | -0.001  | 118.0863 | 365 | 35.5 | Betaine                         |
| 118.0873 | 117.079 | -0.001  | 118.0863 | 321 | 39.6 | Betaine                         |
| 118.0873 | 117.079 | -0.001  | 118.0863 | 318 | 47.3 | Betaine                         |
| 106.0872 | 105     | 0       | 106.09   | 228 | 79.6 | Diethanolamine                  |

|          |         |         |          |     |      |                                 |
|----------|---------|---------|----------|-----|------|---------------------------------|
| 106.0872 | 105     | 0       | 106.09   | 158 | 80.9 | Diethanolamine                  |
| 106.0872 | 105     | 0       | 106.09   | 159 | 75.5 | Diethanolamine                  |
| 186.0588 | 203.091 | 0.0285  | 186.0873 | 106 | 70.2 | Ala-Asn                         |
| 186.0588 | 370.196 | 0.0467  | 186.1055 | 33  | 100  | Ser-His-Lys                     |
| 186.0588 | 370.196 | 0.0467  | 186.1055 | 48  | 100  | Ser-His-Lys                     |
| 148.0974 | 147     | -0.04   | 148.06   | 19  | 100  | O-Acetyl-L-Serine Hydrochloride |
| 148.0974 | 147.053 | -0.037  | 148.0604 | 171 | 100  | O-Acetyl-L-Serine               |
| 148.0974 | 147.053 | -0.037  | 148.0604 | 107 | 100  | O-Acetyl-L-Serine               |
| 118.0873 | 117.079 | -0.001  | 118.0863 | 321 | 34.7 | Betaine                         |
| 84.0822  | 102.092 | -0.0014 | 84.0808  | 269 | 53.1 | Betaine Aldehyde Cation         |
| 84.0822  | 102.092 | -0.0014 | 84.0808  | 213 | 51   | Betaine Aldehyde Cation         |
| 84.0822  | 102.092 | -0.0014 | 84.0808  | 222 | 55.4 | Betaine Aldehyde Cation         |
| 186.0588 | 163.084 | 0.0149  | 186.0737 | 113 | 84.9 | N,N-Bis(2-Hydroxyethyl)Glycine  |
| 186.0588 | 163.084 | 0.0149  | 186.0737 | 141 | 100  | N,N-Bis(2-Hydroxyethyl)Glycine  |
| 186.0588 | 370.196 | 0.0467  | 186.1055 | 107 | 100  | Ser-His-Lys                     |
| 148.0974 | 147     | -0.04   | 148.06   | 35  | 30.6 | O-Acetyl-L-Serine Hydrochloride |
| 148.0974 | 147     | -0.04   | 148.06   | 5   | 100  | O-Acetyl-L-Serine Hydrochloride |
| 148.0974 | 147.053 | -0.037  | 148.0604 | 102 | 73.2 | O-Acetyl-L-Serine               |
| 106.0872 | 105     | 0       | 106.09   | 158 | 79.6 | Diethanolamine                  |
| 84.0822  | 102.092 | -0.0014 | 84.0808  | 280 | 51   | Betaine Aldehyde Cation         |
| 84.0822  | 102.092 | -0.0014 | 84.0808  | 242 | 51   | Betaine Aldehyde Cation         |
| 84.0822  | 102.092 | -0.0014 | 84.0808  | 225 | 54.2 | Betaine Aldehyde Cation         |
| 118.0873 | 117.079 | -0.001  | 118.0863 | 376 | 99   | Betaine                         |
| 118.0873 | 117.079 | -0.001  | 118.0863 | 276 | 57.9 | Betaine                         |
| 118.0873 | 117.079 | -0.001  | 118.0863 | 301 | 69.2 | Betaine                         |
| 106.0872 | 105     | 0       | 106.09   | 159 | 78.6 | Diethanolamine                  |
| 106.0872 | 105     | 0       | 106.09   | 158 | 76   | Diethanolamine                  |
| 106.0872 | 105     | 0       | 106.09   | 277 | 60.6 | Diethanolamine                  |
| 84.0822  | 102.092 | -0.0014 | 84.0808  | 302 | 53.1 | Betaine Aldehyde Cation         |
| 84.0822  | 102.092 | -0.0014 | 84.0808  | 265 | 53.1 | Betaine Aldehyde Cation         |
| 84.0822  | 102.092 | -0.0014 | 84.0808  | 162 | 51   | Betaine Aldehyde Cation         |
| 84.0822  | 102.092 | -0.0014 | 84.0808  | 216 | 52   | Betaine Aldehyde Cation         |
| 186.0588 | 163.084 | 0.0149  | 186.0737 | 142 | 100  | N,N-Bis(2-Hydroxyethyl)Glycine  |
| 186.0588 | 163.084 | 0.0149  | 186.0737 | 164 | 100  | N,N-Bis(2-Hydroxyethyl)Glycine  |
| 148.0974 | 147     | -0.04   | 148.06   | 23  | 55.4 | O-Acetyl-L-Serine Hydrochloride |
| 148.0974 | 147     | -0.04   | 148.06   | 6   | 100  | O-Acetyl-L-Serine Hydrochloride |
| 148.0974 | 147.053 | -0.037  | 148.0604 | 173 | 61.4 | O-Acetyl-L-Serine               |
| 148.0974 | 147.053 | -0.037  | 148.0604 | 175 | 66.1 | O-Acetyl-L-Serine               |
| 97.0774  | 114.104 | 0.0238  | 97.1012  | 43  | 26.6 | Cyclohexanol, 1-Methyl-         |
| 118.0873 | 117.079 | -0.001  | 118.0863 | 383 | 100  | Betaine                         |
| 118.0873 | 117.079 | -0.001  | 118.0863 | 269 | 56.3 | Betaine                         |

|          |         |         |          |     |      |                                |
|----------|---------|---------|----------|-----|------|--------------------------------|
| 118.0873 | 117.079 | -0.001  | 118.0863 | 380 | 50.1 | Betaine                        |
| 106.0872 | 105     | 0       | 106.09   | 114 | 71.4 | Diethanolamine                 |
| 106.0872 | 105     | 0       | 106.09   | 156 | 75.6 | Diethanolamine                 |
| 106.0872 | 105     | 0       | 106.09   | 163 | 100  | Diethanolamine                 |
| 106.0872 | 105     | 0       | 106.09   | 225 | 76.9 | Diethanolamine                 |
| 84.0822  | 102.092 | -0.0014 | 84.0808  | 316 | 54.2 | Betaine Aldehyde Cation        |
| 84.0822  | 102.092 | -0.0014 | 84.0808  | 272 | 51   | Betaine Aldehyde Cation        |
| 84.0822  | 102.092 | -0.0014 | 84.0808  | 211 | 52   | Betaine Aldehyde Cation        |
| 84.0822  | 102.092 | -0.0014 | 84.0808  | 155 | 51   | Betaine Aldehyde Cation        |
| 186.0588 | 163.084 | 0.0149  | 186.0737 | 124 | 100  | N,N-Bis(2-Hydroxyethyl)Glycine |
| 118.0873 | 117.079 | -0.001  | 118.0863 | 266 | 58.7 | Betaine                        |
| 118.0873 | 117.079 | -0.001  | 118.0863 | 305 | 100  | Betaine                        |
| 84.0822  | 102.092 | -0.0014 | 84.0808  | 274 | 53.1 | Betaine Aldehyde Cation        |
| 84.0822  | 102.092 | -0.0014 | 84.0808  | 217 | 52   | Betaine Aldehyde Cation        |
| 84.0822  | 102.092 | -0.0014 | 84.0808  | 148 | 50   | Betaine Aldehyde Cation        |
| 186.0588 | 370.196 | 0.0467  | 186.1055 | 60  | 100  | Ser-His-Lys                    |
| 186.0588 | 163.084 | 0.0149  | 186.0737 | 118 | 100  | N,N-Bis(2-Hydroxyethyl)Glycine |
| 186.0588 | 370.196 | 0.0467  | 186.1055 | 59  | 100  | Ser-His-Lys                    |
| 148.0974 | 147.053 | -0.037  | 148.0604 | 147 | 100  | O-Acetyl-L-Serine              |
| 148.0974 | 147.053 | -0.037  | 148.0604 | 122 | 100  | O-Acetyl-L-Serine              |
| 106.0872 | 105     | 0       | 106.09   | 159 | 73.2 | Diethanolamine                 |
| 84.0822  | 102.092 | -0.0014 | 84.0808  | 244 | 52   | Betaine Aldehyde Cation        |
| 84.0822  | 102.092 | -0.0014 | 84.0808  | 230 | 51   | Betaine Aldehyde Cation        |
| 84.0822  | 102.092 | -0.0014 | 84.0808  | 176 | 53.1 | Betaine Aldehyde Cation        |
| 84.0822  | 102.092 | -0.0014 | 84.0808  | 205 | 54.2 | Betaine Aldehyde Cation        |
| 148.0974 | 147.053 | -0.037  | 148.0604 | 168 | 76.6 | O-Acetyl-L-Serine              |
| 97.0774  | 114.104 | 0.0238  | 97.1012  | 29  | 28.4 | Cyclohexanol, 1-Methyl-        |
| 97.0774  | 114.104 | 0.0238  | 97.1012  | 35  | 25.1 | Cyclohexanemethanol            |
| 118.0873 | 117.079 | -0.001  | 118.0863 | 353 | 56.8 | Betaine                        |
| 118.0873 | 117.079 | -0.001  | 118.0863 | 278 | 89.4 | Betaine                        |
| 118.0873 | 117.079 | -0.001  | 118.0863 | 382 | 43.5 | Betaine                        |
| 106.0872 | 105     | 0       | 106.09   | 140 | 74.2 | Diethanolamine                 |
| 106.0872 | 105     | 0       | 106.09   | 221 | 80.7 | Diethanolamine                 |
| 84.0822  | 102.092 | -0.0014 | 84.0808  | 299 | 52   | Betaine Aldehyde Cation        |
| 84.0822  | 102.092 | -0.0014 | 84.0808  | 290 | 51   | Betaine Aldehyde Cation        |
| 84.0822  | 102.092 | -0.0014 | 84.0808  | 223 | 55.4 | Betaine Aldehyde Cation        |
| 186.0588 | 163.084 | 0.0149  | 186.0737 | 165 | 100  | N,N-Bis(2-Hydroxyethyl)Glycine |
| 118.0873 | 117.079 | -0.001  | 118.0863 | 410 | 49.1 | Betaine                        |
| 118.0873 | 117.079 | -0.001  | 118.0863 | 266 | 53.6 | Betaine                        |
| 118.0873 | 117.079 | -0.001  | 118.0863 | 352 | 98   | Betaine                        |
| 106.0872 | 105     | 0       | 106.09   | 166 | 73   | Diethanolamine                 |

|          |         |         |          |     |      |                                 |
|----------|---------|---------|----------|-----|------|---------------------------------|
| 106.0872 | 105     | 0       | 106.09   | 156 | 79.3 | Diethanolamine                  |
| 106.0872 | 105     | 0       | 106.09   | 267 | 56.6 | Diethanolamine                  |
| 106.0872 | 105.079 | -0.0009 | 106.0863 | 113 | 100  | Diethanolamine                  |
| 84.0822  | 102.092 | -0.0014 | 84.0808  | 328 | 50   | Betaine Aldehyde Cation         |
| 84.0822  | 102.092 | -0.0014 | 84.0808  | 273 | 50   | Betaine Aldehyde Cation         |
| 84.0822  | 102.092 | -0.0014 | 84.0808  | 197 | 53.1 | Betaine Aldehyde Cation         |
| 186.0588 | 163.084 | 0.0149  | 186.0737 | 140 | 90.1 | N,N-Bis(2-Hydroxyethyl)Glycine  |
| 186.0588 | 163.084 | 0.0149  | 186.0737 | 162 | 100  | N,N-Bis(2-Hydroxyethyl)Glycine  |
| 118.0873 | 117.079 | -0.001  | 118.0863 | 275 | 84   | Betaine                         |
| 118.0873 | 117.079 | -0.001  | 118.0863 | 273 | 62.7 | Betaine                         |
| 118.0873 | 117.079 | -0.001  | 118.0863 | 264 | 58.7 | Betaine                         |
| 84.0822  | 102.092 | -0.0014 | 84.0808  | 238 | 50   | Betaine Aldehyde Cation         |
| 84.0822  | 102.092 | -0.0014 | 84.0808  | 196 | 50   | Betaine Aldehyde Cation         |
| 84.0822  | 102.092 | -0.0014 | 84.0808  | 188 | 52   | Betaine Aldehyde Cation         |
| 186.0588 | 370.196 | 0.0467  | 186.1055 | 81  | 100  | Ser-His-Lys                     |
| 148.0974 | 147     | -0.04   | 148.06   | 27  | 39.3 | O-Acetyl-L-Serine Hydrochloride |
| 148.0974 | 147.053 | -0.037  | 148.0604 | 140 | 100  | O-Acetyl-L-Serine               |
| 97.0774  | 114.104 | 0.0238  | 97.1012  | 35  | 22.5 | Cyclohexanol, 4-Methyl-, Trans- |
| 106.0872 | 105     | 0       | 106.09   | 164 | 76.1 | Diethanolamine                  |
| 106.0872 | 105     | 0       | 106.09   | 158 | 75.4 | Diethanolamine                  |
| 148.0974 | 147.053 | -0.037  | 148.0604 | 127 | 68.7 | O-Acetyl-L-Serine               |
| 106.0872 | 105     | 0       | 106.09   | 185 | 78.1 | Diethanolamine                  |
| 106.0872 | 105     | 0       | 106.09   | 210 | 62.1 | Diethanolamine                  |
| 118.0873 | 117.079 | -0.001  | 118.0863 | 231 | 93.3 | Betaine                         |
| 118.0873 | 117.079 | -0.001  | 118.0863 | 434 | 33.8 | Betaine                         |
| 118.0873 | 117.079 | -0.001  | 118.0863 | 321 | 80.7 | Betaine                         |
| 118.0873 | 117.079 | -0.001  | 118.0863 | 338 | 36.6 | Betaine                         |
| 84.0822  | 102.092 | -0.0014 | 84.0808  | 317 | 52   | Betaine Aldehyde Cation         |
| 84.0822  | 102.092 | -0.0014 | 84.0808  | 215 | 53.1 | Betaine Aldehyde Cation         |
| 84.0822  | 102.092 | -0.0014 | 84.0808  | 200 | 51   | Betaine Aldehyde Cation         |
| 84.0822  | 102.092 | -0.0014 | 84.0808  | 247 | 55.4 | Betaine Aldehyde Cation         |
| 186.0588 | 163.084 | 0.0149  | 186.0737 | 121 | 100  | N,N-Bis(2-Hydroxyethyl)Glycine  |
| 186.0588 | 163.084 | 0.0149  | 186.0737 | 153 | 100  | N,N-Bis(2-Hydroxyethyl)Glycine  |
| 148.0974 | 147     | -0.04   | 148.06   | 19  | 100  | O-Acetyl-L-Serine Hydrochloride |
| 118.0873 | 117.079 | -0.001  | 118.0863 | 378 | 58.5 | Betaine                         |
| 118.0873 | 117.079 | -0.001  | 118.0863 | 244 | 41.3 | Betaine                         |
| 118.0873 | 117.079 | -0.001  | 118.0863 | 317 | 58.9 | Betaine                         |
| 106.0872 | 105     | 0       | 106.09   | 174 | 79.9 | Diethanolamine                  |
| 106.0872 | 105     | 0       | 106.09   | 202 | 78.9 | Diethanolamine                  |
| 106.0872 | 105     | 0       | 106.09   | 264 | 68.7 | Diethanolamine                  |
| 84.0822  | 102.092 | -0.0014 | 84.0808  | 272 | 52   | Betaine Aldehyde Cation         |

|          |         |         |          |     |      |                                 |
|----------|---------|---------|----------|-----|------|---------------------------------|
| 84.0822  | 102.092 | -0.0014 | 84.0808  | 273 | 51   | Betaine Aldehyde Cation         |
| 84.0822  | 102.092 | -0.0014 | 84.0808  | 184 | 55.4 | Betaine Aldehyde Cation         |
| 84.0822  | 102.092 | -0.0014 | 84.0808  | 219 | 53.1 | Betaine Aldehyde Cation         |
| 186.0588 | 203.091 | 0.0285  | 186.0873 | 60  | 100  | Ala-Asn                         |
| 186.0588 | 163.084 | 0.0149  | 186.0737 | 144 | 100  | N,N-Bis(2-Hydroxyethyl)Glycine  |
| 118.0873 | 117.079 | -0.001  | 118.0863 | 299 | 37.9 | Betaine                         |
| 118.0873 | 117.079 | -0.001  | 118.0863 | 237 | 84.2 | Betaine                         |
| 118.0873 | 117.079 | -0.001  | 118.0863 | 266 | 58   | Betaine                         |
| 84.0822  | 102.092 | -0.0014 | 84.0808  | 245 | 51   | Betaine Aldehyde Cation         |
| 84.0822  | 102.092 | -0.0014 | 84.0808  | 246 | 51   | Betaine Aldehyde Cation         |
| 186.0588 | 163.084 | 0.0149  | 186.0737 | 154 | 91.4 | N,N-Bis(2-Hydroxyethyl)Glycine  |
| 148.0974 | 147.053 | -0.037  | 148.0604 | 136 | 64.6 | O-Acetyl-L-Serine               |
| 148.0974 | 147.053 | -0.037  | 148.0604 | 190 | 73.2 | O-Acetyl-L-Serine               |
| 148.0974 | 147.053 | -0.037  | 148.0604 | 165 | 72.9 | O-Acetyl-L-Serine               |
| 106.0872 | 105     | 0       | 106.09   | 203 | 75.2 | Diethanolamine                  |
| 106.0872 | 105     | 0       | 106.09   | 152 | 73.2 | Diethanolamine                  |
| 148.0974 | 147     | -0.04   | 148.06   | 39  | 100  | O-Acetyl-L-Serine Hydrochloride |
| 148.0974 | 147     | -0.04   | 148.06   | 59  | 62.3 | O-Acetyl-L-Serine Hydrochloride |
| 148.0974 | 147.053 | -0.037  | 148.0604 | 102 | 100  | O-Acetyl-L-Serine               |
| 106.0872 | 105     | 0       | 106.09   | 155 | 75.9 | Diethanolamine                  |
| 106.0872 | 105     | 0       | 106.09   | 235 | 66   | Diethanolamine                  |
| 118.0873 | 117.079 | -0.001  | 118.0863 | 195 | 100  | Betaine                         |
| 118.0873 | 117.079 | -0.001  | 118.0863 | 377 | 30.8 | Betaine                         |
| 118.0873 | 117.079 | -0.001  | 118.0863 | 301 | 67.5 | Betaine                         |
| 118.0873 | 117.079 | -0.001  | 118.0863 | 365 | 37.1 | Betaine                         |
| 84.0822  | 102.092 | -0.0014 | 84.0808  | 318 | 50   | Betaine Aldehyde Cation         |
| 84.0822  | 102.092 | -0.0014 | 84.0808  | 222 | 56   | Betaine Aldehyde Cation         |
| 84.0822  | 102.092 | -0.0014 | 84.0808  | 164 | 52   | Betaine Aldehyde Cation         |
| 84.0822  | 102.092 | -0.0014 | 84.0808  | 257 | 52   | Betaine Aldehyde Cation         |
| 186.0588 | 163.084 | 0.0149  | 186.0737 | 113 | 85.2 | N,N-Bis(2-Hydroxyethyl)Glycine  |
| 186.0588 | 370.196 | 0.0467  | 186.1055 | 67  | 100  | Ser-His-Lys                     |
| 186.0588 | 163.084 | 0.0149  | 186.0737 | 157 | 100  | N,N-Bis(2-Hydroxyethyl)Glycine  |
| 148.0974 | 147.053 | -0.037  | 148.0604 | 2   | 100  | O-Acetyl-L-Serine               |
| 148.0974 | 147.053 | -0.037  | 148.0604 | 119 | 73.2 | O-Acetyl-L-Serine               |
| 148.0974 | 147.053 | -0.037  | 148.0604 | 130 | 68.7 | O-Acetyl-L-Serine               |
| 106.0872 | 105.079 | -0.0009 | 106.0863 | 123 | 100  | Diethanolamine                  |
| 106.0872 | 105     | 0       | 106.09   | 160 | 78.9 | Diethanolamine                  |
| 118.0873 | 117.079 | -0.001  | 118.0863 | 258 | 82.9 | Betaine                         |
| 118.0873 | 117.079 | -0.001  | 118.0863 | 400 | 67.5 | Betaine                         |
| 118.0873 | 117     | 0       | 118.09   | 334 | 23   | Betaine                         |
| 118.0873 | 117.079 | -0.001  | 118.0863 | 361 | 31.6 | Betaine                         |

|          |         |         |          |     |      |                                |
|----------|---------|---------|----------|-----|------|--------------------------------|
| 84.0822  | 102.092 | -0.0014 | 84.0808  | 268 | 51   | Betaine Aldehyde Cation        |
| 84.0822  | 102.092 | -0.0014 | 84.0808  | 206 | 53.1 | Betaine Aldehyde Cation        |
| 84.0822  | 102.092 | -0.0014 | 84.0808  | 135 | 52   | Betaine Aldehyde Cation        |
| 84.0822  | 102.092 | -0.0014 | 84.0808  | 219 | 53.1 | Betaine Aldehyde Cation        |
| 186.0588 | 163.084 | 0.0149  | 186.0737 | 93  | 84.2 | N,N-Bis(2-Hydroxyethyl)Glycine |
| 106.0872 | 105     | 0       | 106.09   | 211 | 69.8 | Diethanolamine                 |
| 118.0873 | 117.079 | -0.001  | 118.0863 | 385 | 45.1 | Betaine                        |
| 118.0873 | 117.079 | -0.001  | 118.0863 | 332 | 98.8 | Betaine                        |
| 118.0873 | 117.079 | -0.001  | 118.0863 | 348 | 38.2 | Betaine                        |
| 84.0822  | 102.092 | -0.0014 | 84.0808  | 308 | 52   | Betaine Aldehyde Cation        |
| 84.0822  | 102.092 | -0.0014 | 84.0808  | 285 | 50   | Betaine Aldehyde Cation        |
| 84.0822  | 102.092 | -0.0014 | 84.0808  | 218 | 56   | Betaine Aldehyde Cation        |
| 186.0588 | 163.084 | 0.0149  | 186.0737 | 132 | 84.2 | N,N-Bis(2-Hydroxyethyl)Glycine |
| 186.0588 | 163.084 | 0.0149  | 186.0737 | 137 | 100  | N,N-Bis(2-Hydroxyethyl)Glycine |
| 148.0974 | 147.053 | -0.037  | 148.0604 | 122 | 59.4 | O-Acetyl-L-Serine              |
| 148.0974 | 147.053 | -0.037  | 148.0604 | 96  | 59.9 | O-Acetyl-L-Serine              |
| 106.0872 | 105     | 0       | 106.09   | 158 | 76.6 | Diethanolamine                 |
| 106.0872 | 105     | 0       | 106.09   | 148 | 70.2 | Diethanolamine                 |
| 170.0793 | 187.121 | 0.0383  | 170.1176 | 70  | 39.2 | 7-Keto-8-Aminopelargonic Acid  |
| 106.0872 | 105     | 0       | 106.09   | 189 | 76.4 | Diethanolamine                 |
| 118.0873 | 117.079 | -0.001  | 118.0863 | 349 | 57.7 | Betaine                        |
| 118.0873 | 117.079 | -0.001  | 118.0863 | 277 | 61.8 | Betaine                        |
| 118.0873 | 117.079 | -0.001  | 118.0863 | 364 | 58   | Betaine                        |
| 84.0822  | 102.092 | -0.0014 | 84.0808  | 319 | 53.1 | Betaine Aldehyde Cation        |
| 84.0822  | 102.092 | -0.0014 | 84.0808  | 267 | 52   | Betaine Aldehyde Cation        |
| 84.0822  | 102.092 | -0.0014 | 84.0808  | 191 | 52   | Betaine Aldehyde Cation        |
| 186.0588 | 163.084 | 0.0149  | 186.0737 | 87  | 82.2 | N,N-Bis(2-Hydroxyethyl)Glycine |
| 186.0588 | 163.084 | 0.0149  | 186.0737 | 83  | 100  | N,N-Bis(2-Hydroxyethyl)Glycine |
| 97.0774  | 114.104 | 0.0238  | 97.1012  | 44  | 22.9 | Cyclohexanemethanol            |
| 106.0872 | 105     | 0       | 106.09   | 166 | 75.3 | Diethanolamine                 |
| 106.0872 | 105     | 0       | 106.09   | 159 | 73.5 | Diethanolamine                 |
| 118.0873 | 117.079 | -0.001  | 118.0863 | 397 | 99   | Betaine                        |
| 118.0873 | 117.079 | -0.001  | 118.0863 | 323 | 98.3 | Betaine                        |
| 118.0873 | 117.079 | -0.001  | 118.0863 | 370 | 32.5 | Betaine                        |
| 84.0822  | 102.092 | -0.0014 | 84.0808  | 325 | 52   | Betaine Aldehyde Cation        |
| 84.0822  | 102.092 | -0.0014 | 84.0808  | 309 | 53.1 | Betaine Aldehyde Cation        |
| 84.0822  | 102.092 | -0.0014 | 84.0808  | 158 | 54.2 | Betaine Aldehyde Cation        |
| 84.0822  | 102.092 | -0.0014 | 84.0808  | 186 | 51   | Betaine Aldehyde Cation        |
| 186.0588 | 370.196 | 0.0467  | 186.1055 | 38  | 100  | Ser-His-Lys                    |
| 186.0588 | 163.084 | 0.0149  | 186.0737 | 141 | 100  | N,N-Bis(2-Hydroxyethyl)Glycine |
| 186.0588 | 163.084 | 0.0149  | 186.0737 | 150 | 100  | N,N-Bis(2-Hydroxyethyl)Glycine |

|          |         |         |          |     |      |                                 |
|----------|---------|---------|----------|-----|------|---------------------------------|
| 148.0974 | 147     | -0.04   | 148.06   | 18  | 100  | O-Acetyl-L-Serine Hydrochloride |
| 148.0974 | 147     | -0.04   | 148.06   | 13  | 100  | O-Acetyl-L-Serine Hydrochloride |
| 148.0974 | 147.053 | -0.037  | 148.0604 | 215 | 78.6 | O-Acetyl-L-Serine               |
| 97.0774  | 114.104 | 0.0238  | 97.1012  | 55  | 22   | Cyclohexanol, 4-Methyl-, Trans- |
| 97.0774  | 114.104 | 0.0238  | 97.1012  | 34  | 26.6 | Cyclohexanemethanol             |
| 106.0872 | 105     | 0       | 106.09   | 157 | 78.6 | Diethanolamine                  |
| 106.0872 | 105     | 0       | 106.09   | 202 | 76.1 | Diethanolamine                  |
| 118.0873 | 117.079 | -0.001  | 118.0863 | 217 | 100  | Betaine                         |
| 118.0873 | 117.079 | -0.001  | 118.0863 | 413 | 50.4 | Betaine                         |
| 118.0873 | 117     | 0       | 118.09   | 317 | 24.9 | Betaine                         |
| 118.0873 | 117     | 0       | 118.09   | 354 | 25.4 | Betaine                         |
| 84.0822  | 102.092 | -0.0014 | 84.0808  | 307 | 52   | Betaine Aldehyde Cation         |
| 84.0822  | 102.092 | -0.0014 | 84.0808  | 269 | 50   | Betaine Aldehyde Cation         |
| 84.0822  | 102.092 | -0.0014 | 84.0808  | 173 | 52   | Betaine Aldehyde Cation         |
| 186.0588 | 163.084 | 0.0149  | 186.0737 | 125 | 100  | N,N-Bis(2-Hydroxyethyl)Glycine  |
| 106.0872 | 105     | 0       | 106.09   | 186 | 74.1 | Diethanolamine                  |
| 106.0872 | 105     | 0       | 106.09   | 270 | 73.2 | Diethanolamine                  |
| 106.0872 | 105     | 0       | 106.09   | 157 | 80.9 | Diethanolamine                  |
| 118.0873 | 117.079 | -0.001  | 118.0863 | 365 | 46.3 | Betaine                         |
| 118.0873 | 117.079 | -0.001  | 118.0863 | 248 | 71.1 | Betaine                         |
| 118.0873 | 117     | 0       | 118.09   | 320 | 26.5 | Betaine                         |
| 84.0822  | 102.092 | -0.0014 | 84.0808  | 315 | 52   | Betaine Aldehyde Cation         |
| 84.0822  | 102.092 | -0.0014 | 84.0808  | 299 | 50   | Betaine Aldehyde Cation         |
| 84.0822  | 102.092 | -0.0014 | 84.0808  | 155 | 50   | Betaine Aldehyde Cation         |
| 148.0974 | 147     | -0.04   | 148.06   | 31  | 56   | N-Acetyl-DL-Serine              |
| 148.0974 | 147.053 | -0.037  | 148.0604 | 116 | 73.5 | O-Acetyl-L-Serine               |
| 148.0974 | 147.053 | -0.037  | 148.0604 | 143 | 65.7 | O-Acetyl-L-Serine               |
| 118.0873 | 117.079 | -0.001  | 118.0863 | 265 | 57.3 | Betaine                         |
| 84.0822  | 102.092 | -0.0014 | 84.0808  | 276 | 53.1 | Betaine Aldehyde Cation         |
| 84.0822  | 102.092 | -0.0014 | 84.0808  | 256 | 53.1 | Betaine Aldehyde Cation         |
| 84.0822  | 102.092 | -0.0014 | 84.0808  | 103 | 54.2 | Betaine Aldehyde Cation         |
| 84.0822  | 102.092 | -0.0014 | 84.0808  | 149 | 53.1 | Betaine Aldehyde Cation         |
| 186.0588 | 163.084 | 0.0149  | 186.0737 | 177 | 100  | N,N-Bis(2-Hydroxyethyl)Glycine  |
| 186.0588 | 163.084 | 0.0149  | 186.0737 | 152 | 92.7 | N,N-Bis(2-Hydroxyethyl)Glycine  |
| 148.0974 | 147     | -0.04   | 148.06   | 82  | 68.7 | O-Acetyl-L-Serine Hydrochloride |
| 148.0974 | 147.053 | -0.037  | 148.0604 | 169 | 59.3 | O-Acetyl-L-Serine               |
| 97.0774  | 114.104 | 0.0238  | 97.1012  | 60  | 29.1 | Cyclohexanol, 1-Methyl-         |
| 106.0872 | 105     | 0       | 106.09   | 159 | 75.9 | Diethanolamine                  |
| 106.0872 | 105     | 0       | 106.09   | 186 | 71.8 | Diethanolamine                  |
| 106.0872 | 105     | 0       | 106.09   | 157 | 78.6 | Diethanolamine                  |
| 118.0873 | 117.079 | -0.001  | 118.0863 | 278 | 100  | Betaine                         |



|          |         |         |          |     |      |                                 |
|----------|---------|---------|----------|-----|------|---------------------------------|
| 118.0873 | 117.079 | -0.001  | 118.0863 | 390 | 53.2 | Betaine                         |
| 118.0873 | 117.079 | -0.001  | 118.0863 | 237 | 80.8 | Betaine                         |
| 118.0873 | 117.079 | -0.001  | 118.0863 | 416 | 57.6 | Betaine                         |
| 84.0822  | 102.092 | -0.0014 | 84.0808  | 317 | 54.2 | Betaine Aldehyde Cation         |
| 84.0822  | 102.092 | -0.0014 | 84.0808  | 292 | 51   | Betaine Aldehyde Cation         |
| 84.0822  | 102.092 | -0.0014 | 84.0808  | 190 | 53.1 | Betaine Aldehyde Cation         |
| 186.0588 | 163.084 | 0.0149  | 186.0737 | 102 | 65.5 | N,N-Bis(2-Hydroxyethyl)Glycine  |
| 186.0588 | 163.084 | 0.0149  | 186.0737 | 148 | 100  | N,N-Bis(2-Hydroxyethyl)Glycine  |
| 186.0588 | 163.084 | 0.0149  | 186.0737 | 157 | 100  | N,N-Bis(2-Hydroxyethyl)Glycine  |
| 148.0974 | 147     | -0.04   | 148.06   | 32  | 37.6 | N-Acetyl-DL-Serine              |
| 148.0974 | 147.053 | -0.037  | 148.0604 | 177 | 69.7 | O-Acetyl-L-Serine               |
| 97.0774  | 114.104 | 0.0238  | 97.1012  | 41  | 23.3 | Cyclohexanol, 4-Methyl-, Trans- |
| 106.0872 | 105     | 0       | 106.09   | 164 | 74   | Diethanolamine                  |
| 106.0872 | 105     | 0       | 106.09   | 154 | 78.9 | Diethanolamine                  |
| 106.0872 | 105.079 | -0.0009 | 106.0863 | 167 | 100  | Diethanolamine                  |
| 186.0588 | 163.084 | 0.0149  | 186.0737 | 170 | 100  | N,N-Bis(2-Hydroxyethyl)Glycine  |
| 186.0588 | 370.196 | 0.0467  | 186.1055 | 68  | 100  | Ser-His-Lys                     |
| 106.0872 | 105     | 0       | 106.09   | 170 | 75.8 | Diethanolamine                  |
| 106.0872 | 105     | 0       | 106.09   | 156 | 80.2 | Diethanolamine                  |
| 106.0872 | 105     | 0       | 106.09   | 187 | 68.4 | Diethanolamine                  |
| 106.0872 | 105     | 0       | 106.09   | 153 | 78.6 | Diethanolamine                  |
| 118.0873 | 117.079 | -0.001  | 118.0863 | 374 | 66.3 | Betaine                         |
| 118.0873 | 117.079 | -0.001  | 118.0863 | 333 | 30.3 | Betaine                         |
| 84.0822  | 102.092 | -0.0014 | 84.0808  | 321 | 50   | Betaine Aldehyde Cation         |
| 84.0822  | 102.092 | -0.0014 | 84.0808  | 254 | 55.4 | Betaine Aldehyde Cation         |
| 84.0822  | 102.092 | -0.0014 | 84.0808  | 228 | 53.1 | Betaine Aldehyde Cation         |
| 170.0793 | 187.121 | 0.0383  | 170.1176 | 40  | 100  | 7-Keto-8-Aminopelargonic Acid   |
| 148.0974 | 147     | -0.04   | 148.06   | 15  | 100  | O-Acetyl-L-Serine Hydrochloride |
| 148.0974 | 147.053 | -0.037  | 148.0604 | 133 | 100  | O-Acetyl-L-Serine               |
| 84.0822  | 102.092 | -0.0014 | 84.0808  | 187 | 50   | Betaine Aldehyde Cation         |
| 84.0822  | 102.092 | -0.0014 | 84.0808  | 182 | 52   | Betaine Aldehyde Cation         |
| 84.0822  | 102.092 | -0.0014 | 84.0808  | 136 | 51   | Betaine Aldehyde Cation         |
| 118.0873 | 117.079 | -0.001  | 118.0863 | 402 | 71   | Betaine                         |
| 118.0873 | 117.079 | -0.001  | 118.0863 | 295 | 66   | Betaine                         |
| 118.0873 | 117.079 | -0.001  | 118.0863 | 332 | 98.8 | Betaine                         |
| 186.0588 | 370.196 | 0.0467  | 186.1055 | 61  | 100  | Ser-His-Lys                     |
| 186.0588 | 163.084 | 0.0149  | 186.0737 | 131 | 100  | N,N-Bis(2-Hydroxyethyl)Glycine  |
| 148.0974 | 147.053 | -0.037  | 148.0604 | 35  | 37.8 | O-Acetyl-L-Serine               |
| 148.0974 | 147.053 | -0.037  | 148.0604 | 130 | 74.9 | O-Acetyl-L-Serine               |
| 148.0974 | 147.053 | -0.037  | 148.0604 | 125 | 53.4 | O-Acetyl-L-Serine               |
| 97.0774  | 114.104 | 0.0238  | 97.1012  | 47  | 24.4 | Cyclohexanol, 4-Methyl-, Trans- |

|          |         |         |          |     |      |                                               |
|----------|---------|---------|----------|-----|------|-----------------------------------------------|
| 106.0872 | 105     | 0       | 106.09   | 152 | 78.9 | Diethanolamine                                |
| 106.0872 | 105     | 0       | 106.09   | 157 | 78.2 | Diethanolamine                                |
| 84.0822  | 102.092 | -0.0014 | 84.0808  | 285 | 50   | Betaine Aldehyde Cation                       |
| 84.0822  | 102.092 | -0.0014 | 84.0808  | 267 | 52   | Betaine Aldehyde Cation                       |
| 84.0822  | 102.092 | -0.0014 | 84.0808  | 252 | 51   | Betaine Aldehyde Cation                       |
| 118.0873 | 117.079 | -0.001  | 118.0863 | 390 | 38.2 | Betaine                                       |
| 118.0873 | 117.079 | -0.001  | 118.0863 | 291 | 65.3 | Betaine                                       |
| 118.0873 | 117.079 | -0.001  | 118.0863 | 365 | 55.7 | Betaine                                       |
| 186.0588 | 370.196 | 0.0467  | 186.1055 | 56  | 100  | Ser-His-Lys                                   |
| 186.0588 | 163.084 | 0.0149  | 186.0737 | 129 | 76.9 | N,N-Bis(2-Hydroxyethyl)Glycine                |
| 148.0974 | 147.053 | -0.037  | 148.0604 | 133 | 63.4 | O-Acetyl-L-Serine                             |
| 106.0872 | 105     | 0       | 106.09   | 158 | 75.1 | Diethanolamine                                |
| 106.0872 | 105     | 0       | 106.09   | 158 | 75.4 | Diethanolamine                                |
| 106.0872 | 105     | 0       | 106.09   | 154 | 78.9 | Diethanolamine                                |
| 84.0822  | 102.092 | -0.0014 | 84.0808  | 311 | 51   | Betaine Aldehyde Cation                       |
| 84.0822  | 102.092 | -0.0014 | 84.0808  | 244 | 52   | Betaine Aldehyde Cation                       |
| 118.0873 | 117.079 | -0.001  | 118.0863 | 177 | 100  | 5-Aminovaleric Acid                           |
| 118.0873 | 117.079 | -0.001  | 118.0863 | 416 | 98.5 | Betaine                                       |
| 118.0873 | 117.079 | -0.001  | 118.0863 | 278 | 59.1 | Betaine                                       |
| 118.0873 | 117.079 | -0.001  | 118.0863 | 340 | 48.1 | Betaine                                       |
| 186.0588 | 370.196 | 0.0467  | 186.1055 | 46  | 100  | Ser-His-Lys                                   |
| 186.0588 | 163.084 | 0.0149  | 186.0737 | 153 | 91.8 | N,N-Bis(2-Hydroxyethyl)Glycine                |
| 186.0588 | 163.084 | 0.0149  | 186.0737 | 140 | 100  | N,N-Bis(2-Hydroxyethyl)Glycine                |
| 148.0974 | 147     | -0.04   | 148.06   | 65  | 51.2 | O-Acetyl-L-Serine Hydrochloride               |
| 148.0974 | 147.053 | -0.037  | 148.0604 | 170 | 100  | O-Acetyl-L-Serine                             |
| 106.0872 | 105     | 0       | 106.09   | 159 | 75.5 | Diethanolamine                                |
| 106.0872 | 105     | 0       | 106.09   | 261 | 79.6 | Diethanolamine                                |
| 371.2746 | 370.308 | 0.041   | 371.3156 | 228 | 89.2 | Hexanedioic Acid, Bis(2-Ethylhexyl) Ester     |
| 371.2746 | 370.308 | 0.041   | 371.3156 | 169 | 100  | Hexanedioic Acid, Bis(2-Ethylhexyl) Ester     |
| 371.2746 | 370.308 | 0.041   | 371.3156 | 85  | 100  | Hexanedioic Acid, Bis(2-Ethylhexyl) Ester     |
| 371.2746 | 370.214 | -0.0529 | 371.2217 | 56  | 100  | 17-Phenyltrinor-13,14-Dihydroprostaglandin A2 |
| 97.0774  | 114.104 | 0.0238  | 97.1012  | 25  | 26.2 | Cyclohexanol, 1-Methyl-                       |
| 106.0872 | 105     | 0       | 106.09   | 159 | 79.9 | Diethanolamine                                |
| 84.0822  | 102.092 | -0.0014 | 84.0808  | 295 | 52   | Betaine Aldehyde Cation                       |
| 84.0822  | 102.092 | -0.0014 | 84.0808  | 267 | 51   | Betaine Aldehyde Cation                       |
| 84.0822  | 102.092 | -0.0014 | 84.0808  | 201 | 56   | Betaine Aldehyde Cation                       |
| 118.0873 | 117.079 | -0.001  | 118.0863 | 371 | 62.5 | Betaine                                       |
| 118.0873 | 117.079 | -0.001  | 118.0863 | 298 | 66.5 | Betaine                                       |
| 118.0873 | 117.079 | -0.001  | 118.0863 | 315 | 58.5 | Betaine                                       |

|          |         |         |          |     |      |                                 |
|----------|---------|---------|----------|-----|------|---------------------------------|
| 186.0588 | 163.084 | 0.0149  | 186.0737 | 141 | 100  | N,N-Bis(2-Hydroxyethyl)Glycine  |
| 148.0974 | 147     | -0.04   | 148.06   | 20  | 31.3 | N-Acetyl-DL-Serine              |
| 148.0974 | 147.053 | -0.037  | 148.0604 | 143 | 100  | O-Acetyl-L-Serine               |
| 97.0774  | 114.104 | 0.0238  | 97.1012  | 39  | 25.2 | Cyclohexanemethanol             |
| 106.0872 | 105     | 0       | 106.09   | 156 | 71.7 | Diethanolamine                  |
| 106.0872 | 105     | 0       | 106.09   | 158 | 79.6 | Diethanolamine                  |
| 106.0872 | 105     | 0       | 106.09   | 230 | 76.6 | Diethanolamine                  |
| 84.0822  | 102.092 | -0.0014 | 84.0808  | 290 | 50   | Betaine Aldehyde Cation         |
| 84.0822  | 102.092 | -0.0014 | 84.0808  | 248 | 51   | Betaine Aldehyde Cation         |
| 84.0822  | 102.092 | -0.0014 | 84.0808  | 178 | 54.2 | Betaine Aldehyde Cation         |
| 118.0873 | 117.079 | -0.001  | 118.0863 | 359 | 39.7 | Betaine                         |
| 118.0873 | 117.079 | -0.001  | 118.0863 | 305 | 68.2 | Betaine                         |
| 118.0873 | 117.079 | -0.001  | 118.0863 | 315 | 47.1 | Betaine                         |
| 148.0974 | 147.053 | -0.037  | 148.0604 | 112 | 50.2 | O-Acetyl-L-Serine               |
| 148.0974 | 147.053 | -0.037  | 148.0604 | 131 | 54.7 | O-Acetyl-L-Serine               |
| 148.0974 | 147.053 | -0.037  | 148.0604 | 184 | 70.3 | O-Acetyl-L-Serine               |
| 97.0774  | 114.104 | 0.0238  | 97.1012  | 33  | 25.4 | Cyclohexanol, 2-Methyl-, Trans- |
| 106.0872 | 105     | 0       | 106.09   | 151 | 78.2 | Diethanolamine                  |
| 106.0872 | 105.079 | -0.0009 | 106.0863 | 173 | 100  | Diethanolamine                  |
| 106.0872 | 105.079 | -0.0009 | 106.0863 | 105 | 100  | Diethanolamine                  |
| 84.0822  | 102.092 | -0.0014 | 84.0808  | 317 | 52   | Betaine Aldehyde Cation         |
| 84.0822  | 102.092 | -0.0014 | 84.0808  | 271 | 52   | Betaine Aldehyde Cation         |
| 84.0822  | 102.092 | -0.0014 | 84.0808  | 207 | 54.2 | Betaine Aldehyde Cation         |
| 118.0873 | 117.079 | -0.001  | 118.0863 | 207 | 100  | Betaine                         |
| 118.0873 | 117.079 | -0.001  | 118.0863 | 397 | 50.6 | Betaine                         |
| 118.0873 | 117.079 | -0.001  | 118.0863 | 277 | 58.4 | Betaine                         |
| 118.0873 | 117.079 | -0.001  | 118.0863 | 351 | 53.1 | Betaine                         |
| 186.0588 | 163.084 | 0.0149  | 186.0737 | 134 | 91.1 | N,N-Bis(2-Hydroxyethyl)Glycine  |
| 148.0974 | 147     | -0.04   | 148.06   | 26  | 24.2 | O-Acetyl-L-Serine Hydrochloride |
| 148.0974 | 147.053 | -0.037  | 148.0604 | 41  | 32.1 | O-Acetyl-L-Serine               |
| 148.0974 | 147.053 | -0.037  | 148.0604 | 81  | 100  | O-Acetyl-L-Serine               |
| 148.0974 | 147.053 | -0.037  | 148.0604 | 71  | 49   | O-Acetyl-L-Serine               |
| 97.0774  | 114.104 | 0.0238  | 97.1012  | 24  | 52   | Cyclohexanol, 4-Methyl-, Trans- |
| 106.0872 | 105     | 0       | 106.09   | 158 | 78.3 | Diethanolamine                  |
| 106.0872 | 105     | 0       | 106.09   | 148 | 77.9 | Diethanolamine                  |
| 106.0872 | 105     | 0       | 106.09   | 214 | 75   | Diethanolamine                  |
| 84.0822  | 102.092 | -0.0014 | 84.0808  | 309 | 53.1 | Betaine Aldehyde Cation         |
| 84.0822  | 102.092 | -0.0014 | 84.0808  | 247 | 52   | Betaine Aldehyde Cation         |
| 84.0822  | 102.092 | -0.0014 | 84.0808  | 154 | 100  | Betaine Aldehyde Cation         |
| 84.0822  | 102.092 | -0.0014 | 84.0808  | 169 | 56.6 | Betaine Aldehyde Cation         |
| 118.0873 | 117.079 | -0.001  | 118.0863 | 364 | 61.1 | Betaine                         |

|          |         |         |          |     |      |                                           |
|----------|---------|---------|----------|-----|------|-------------------------------------------|
| 118.0873 | 117.079 | -0.001  | 118.0863 | 386 | 98.5 | Betaine                                   |
| 118.0873 | 117.079 | -0.001  | 118.0863 | 281 | 66.6 | Betaine                                   |
| 118.0873 | 117.079 | -0.001  | 118.0863 | 327 | 27.1 | Betaine                                   |
| 148.0974 | 147     | -0.04   | 148.06   | 9   | 50   | O-Acetyl-L-Serine Hydrochloride           |
| 148.0974 | 147.053 | -0.037  | 148.0604 | 210 | 76.6 | O-Acetyl-L-Serine                         |
| 148.0974 | 147.053 | -0.037  | 148.0604 | 117 | 43.7 | O-Acetyl-L-Serine                         |
| 97.0774  | 114.104 | 0.0238  | 97.1012  | 20  | 100  | Cyclohexanemethanol                       |
| 97.0774  | 114.104 | 0.0238  | 97.1012  | 110 | 60   | Cyclohexanemethanol                       |
| 106.0872 | 105     | 0       | 106.09   | 245 | 75.7 | Diethanolamine                            |
| 186.0588 | 370.196 | 0.0467  | 186.1055 | 32  | 54.2 | Ser-His-Lys                               |
| 148.0974 | 147.053 | -0.037  | 148.0604 | 26  | 21   | O-Acetyl-L-Serine                         |
| 148.0974 | 147.053 | -0.037  | 148.0604 | 49  | 100  | O-Acetyl-L-Serine                         |
| 84.0822  | 102.092 | -0.0014 | 84.0808  | 141 | 52   | Betaine Aldehyde Cation                   |
| 84.0822  | 102.092 | -0.0014 | 84.0808  | 185 | 51   | Betaine Aldehyde Cation                   |
| 118.0873 | 117.079 | -0.001  | 118.0863 | 326 | 37.3 | Betaine                                   |
| 118.0873 | 117.079 | -0.001  | 118.0863 | 272 | 61.3 | Betaine                                   |
| 118.0873 | 117.079 | -0.001  | 118.0863 | 257 | 54.7 | Betaine                                   |
| 186.0588 | 163.084 | 0.0149  | 186.0737 | 119 | 100  | N,N-Bis(2-Hydroxyethyl)Glycine            |
| 186.0588 | 370.196 | 0.0467  | 186.1055 | 55  | 100  | Ser-His-Lys                               |
| 186.0588 | 163.084 | 0.0149  | 186.0737 | 147 | 100  | N,N-Bis(2-Hydroxyethyl)Glycine            |
| 148.0974 | 147.053 | -0.037  | 148.0604 | 114 | 50.2 | O-Acetyl-L-Serine                         |
| 371.2746 | 370.308 | 0.041   | 371.3156 | 194 | 70.6 | Hexanedioic Acid, Bis(2-Ethylhexyl) Ester |
| 371.2746 | 370.308 | 0.041   | 371.3156 | 170 | 78.3 | Hexanedioic Acid, Bis(2-Ethylhexyl) Ester |
| 371.2746 | 370.308 | 0.041   | 371.3156 | 80  | 100  | Hexanedioic Acid, Bis(2-Ethylhexyl) Ester |
| 371.2746 | 370.308 | 0.041   | 371.3156 | 140 | 100  | Hexanedioic Acid, Bis(2-Ethylhexyl) Ester |
| 97.0774  | 114.104 | 0.0238  | 97.1012  | 75  | 21.6 | Cyclohexanol, 1-Methyl-                   |
| 106.0872 | 105     | 0       | 106.09   | 155 | 71.7 | Diethanolamine                            |
| 106.0872 | 105     | 0       | 106.09   | 232 | 78.2 | Diethanolamine                            |
| 84.0822  | 102.092 | -0.0014 | 84.0808  | 289 | 51   | Betaine Aldehyde Cation                   |
| 84.0822  | 102.092 | -0.0014 | 84.0808  | 252 | 53.1 | Betaine Aldehyde Cation                   |
| 84.0822  | 102.092 | -0.0014 | 84.0808  | 113 | 53.1 | Betaine Aldehyde Cation                   |
| 118.0873 | 117.079 | -0.001  | 118.0863 | 319 | 32.2 | Betaine                                   |
| 118.0873 | 117.079 | -0.001  | 118.0863 | 276 | 61.7 | Betaine                                   |
| 118.0873 | 117.079 | -0.001  | 118.0863 | 372 | 45.1 | Betaine                                   |
| 186.0588 | 370.196 | 0.0467  | 186.1055 | 52  | 100  | Ser-His-Lys                               |
| 186.0588 | 203.091 | 0.0285  | 186.0873 | 75  | 100  | Ala-Asn                                   |
| 148.0974 | 147     | -0.04   | 148.06   | 33  | 56   | O-Acetyl-L-Serine Hydrochloride           |
| 148.0974 | 147.053 | -0.037  | 148.0604 | 178 | 100  | O-Acetyl-L-Serine                         |
| 97.0774  | 114.104 | 0.0238  | 97.1012  | 98  | 24.3 | Cyclohexanol, 4-Methyl-, Trans-           |

|          |         |         |          |     |      |                                 |
|----------|---------|---------|----------|-----|------|---------------------------------|
| 106.0872 | 105     | 0       | 106.09   | 154 | 74.8 | Diethanolamine                  |
| 106.0872 | 105     | 0       | 106.09   | 253 | 76.6 | Diethanolamine                  |
| 84.0822  | 102.092 | -0.0014 | 84.0808  | 300 | 55.4 | Betaine Aldehyde Cation         |
| 84.0822  | 102.092 | -0.0014 | 84.0808  | 253 | 53.1 | Betaine Aldehyde Cation         |
| 84.0822  | 102.092 | -0.0014 | 84.0808  | 228 | 55.4 | Betaine Aldehyde Cation         |
| 118.0873 | 117.079 | -0.001  | 118.0863 | 321 | 50.1 | Betaine                         |
| 118.0873 | 117.079 | -0.001  | 118.0863 | 365 | 55.6 | Betaine                         |
| 148.0974 | 147     | -0.04   | 148.06   | 12  | 100  | O-Acetyl-L-Serine Hydrochloride |
| 148.0974 | 147.053 | -0.037  | 148.0604 | 119 | 100  | O-Acetyl-L-Serine               |
| 97.0774  | 114.104 | 0.0238  | 97.1012  | 70  | 52   | Cyclohexanemethanol             |
| 106.0872 | 105     | 0       | 106.09   | 157 | 79.3 | Diethanolamine                  |
| 106.0872 | 105.079 | -0.0009 | 106.0863 | 111 | 100  | Diethanolamine                  |
| 84.0822  | 102.092 | -0.0014 | 84.0808  | 289 | 51   | Betaine Aldehyde Cation         |
| 84.0822  | 102.092 | -0.0014 | 84.0808  | 253 | 51   | Betaine Aldehyde Cation         |
| 84.0822  | 102.092 | -0.0014 | 84.0808  | 157 | 55.4 | Betaine Aldehyde Cation         |
| 84.0822  | 102.092 | -0.0014 | 84.0808  | 171 | 54.2 | Betaine Aldehyde Cation         |
| 118.0873 | 117.079 | -0.001  | 118.0863 | 330 | 43.4 | Betaine                         |
| 118.0873 | 117.079 | -0.001  | 118.0863 | 272 | 72.7 | Betaine                         |
| 118.0873 | 117.079 | -0.001  | 118.0863 | 326 | 99   | Betaine                         |
| 97.0774  | 114.104 | 0.0238  | 97.1012  | 51  | 25.3 | Cyclohexanol, 1-Methyl-         |
| 84.0822  | 102.092 | -0.0014 | 84.0808  | 255 | 50   | Betaine Aldehyde Cation         |
| 84.0822  | 102.092 | -0.0014 | 84.0808  | 185 | 51   | Betaine Aldehyde Cation         |
| 84.0822  | 102.092 | -0.0014 | 84.0808  | 166 | 53.1 | Betaine Aldehyde Cation         |
| 106.0872 | 105     | 0       | 106.09   | 159 | 78.9 | Diethanolamine                  |
| 106.0872 | 105     | 0       | 106.09   | 180 | 67.3 | Diethanolamine                  |
| 186.0588 | 370.196 | 0.0467  | 186.1055 | 38  | 100  | Ser-His-Lys                     |
| 186.0588 | 370.196 | 0.0467  | 186.1055 | 68  | 100  | Ser-His-Lys                     |
| 148.0974 | 147     | -0.04   | 148.06   | 21  | 100  | O-Acetyl-L-Serine Hydrochloride |
| 148.0974 | 147.053 | -0.037  | 148.0604 | 140 | 100  | O-Acetyl-L-Serine               |
| 84.0822  | 102.092 | -0.0014 | 84.0808  | 168 | 51   | Betaine Aldehyde Cation         |
| 84.0822  | 102.092 | -0.0014 | 84.0808  | 149 | 50   | Betaine Aldehyde Cation         |
| 84.0822  | 102.092 | -0.0014 | 84.0808  | 147 | 52   | Betaine Aldehyde Cation         |
| 186.0588 | 370.196 | 0.0467  | 186.1055 | 73  | 100  | Ser-His-Lys                     |
| 118.0873 | 117.079 | -0.001  | 118.0863 | 213 | 100  | Betaine                         |
| 121.1229 | 60.032  | -0.051  | 121.072  | 21  | 64.7 | Urea                            |
| 121.1229 | 60.032  | -0.051  | 121.072  | 37  | 78.9 | Urea                            |
| 121.1229 | 60.058  | -0.0006 | 121.1223 | 2   | 100  | 1-Propanol                      |
| 121.1229 | 60.032  | -0.051  | 121.072  | 44  | 81.7 | Urea                            |
| 84.0822  | 102.092 | -0.0014 | 84.0808  | 247 | 51   | Betaine Aldehyde Cation         |
| 84.0822  | 102.092 | -0.0014 | 84.0808  | 184 | 52   | Betaine Aldehyde Cation         |
| 84.0822  | 102.092 | -0.0014 | 84.0808  | 200 | 53.1 | Betaine Aldehyde Cation         |

|          |         |         |          |     |      |                                 |
|----------|---------|---------|----------|-----|------|---------------------------------|
| 106.0872 | 105     | 0       | 106.09   | 151 | 75.3 | Diethanolamine                  |
| 106.0872 | 105.079 | -0.0009 | 106.0863 | 125 | 100  | Diethanolamine                  |
| 106.0872 | 105     | 0       | 106.09   | 218 | 77.3 | Diethanolamine                  |
| 148.0974 | 147.053 | -0.037  | 148.0604 | 89  | 69.5 | O-Acetyl-L-Serine               |
| 121.1229 | 60.032  | -0.051  | 121.072  | 29  | 77.9 | Urea                            |
| 121.1229 | 60.032  | -0.051  | 121.072  | 31  | 78.2 | Urea                            |
| 121.1229 | 60.058  | -0.0006 | 121.1223 | 10  | 100  | 1-Propanol                      |
| 121.1229 | 60.032  | -0.051  | 121.072  | 73  | 83.2 | Urea                            |
| 228.1067 | 227.12  | 0.021   | 228.1277 | 146 | 100  | Ametryn                         |
| 84.0822  | 102.092 | -0.0014 | 84.0808  | 237 | 53.1 | Betaine Aldehyde Cation         |
| 84.0822  | 102.092 | -0.0014 | 84.0808  | 185 | 51   | Betaine Aldehyde Cation         |
| 84.0822  | 102.092 | -0.0014 | 84.0808  | 190 | 51   | Betaine Aldehyde Cation         |
| 106.0872 | 105     | 0       | 106.09   | 160 | 75.3 | Diethanolamine                  |
| 106.0872 | 105     | 0       | 106.09   | 159 | 75.5 | Diethanolamine                  |
| 106.0872 | 105     | 0       | 106.09   | 159 | 74.3 | Diethanolamine                  |
| 121.1229 | 60.032  | -0.051  | 121.072  | 26  | 76.9 | Urea                            |
| 121.1229 | 60.032  | -0.051  | 121.072  | 38  | 68.7 | Urea                            |
| 121.1229 | 60.032  | -0.051  | 121.072  | 64  | 85.6 | Urea                            |
| 228.1067 | 227.12  | 0.021   | 228.1277 | 67  | 100  | Ametryn                         |
| 84.0822  | 102.092 | -0.0014 | 84.0808  | 262 | 52   | Betaine Aldehyde Cation         |
| 84.0822  | 102.092 | -0.0014 | 84.0808  | 219 | 51   | Betaine Aldehyde Cation         |
| 84.0822  | 102.092 | -0.0014 | 84.0808  | 132 | 51   | Betaine Aldehyde Cation         |
| 106.0872 | 105     | 0       | 106.09   | 169 | 76   | Diethanolamine                  |
| 106.0872 | 105     | 0       | 106.09   | 151 | 76.6 | Diethanolamine                  |
| 106.0872 | 105     | 0       | 106.09   | 200 | 64.3 | Diethanolamine                  |
| 148.0974 | 147     | -0.04   | 148.06   | 59  | 51   | O-Acetyl-L-Serine Hydrochloride |
| 148.0974 | 147.053 | -0.037  | 148.0604 | 149 | 100  | O-Acetyl-L-Serine               |
| 148.0974 | 147.053 | -0.037  | 148.0604 | 120 | 100  | O-Acetyl-L-Serine               |
| 103.1124 | 102.068 | -0.037  | 103.0754 | 114 | 82.4 | Pentanoic Acid                  |
| 103.1124 | 102.068 | -0.037  | 103.0754 | 64  | 100  | Pentanoic Acid                  |
| 121.1229 | 60.032  | -0.051  | 121.072  | 58  | 80.9 | Urea                            |
| 121.1229 | 60.032  | -0.051  | 121.072  | 67  | 83.1 | Urea                            |
| 121.1229 | 60.058  | -0.0006 | 121.1223 | 2   | 100  | 1-Propanol                      |
| 148.0974 | 147     | -0.04   | 148.06   | 64  | 54.2 | O-Acetyl-L-Serine Hydrochloride |
| 103.1124 | 102.068 | -0.037  | 103.0754 | 204 | 77.3 | Pentanoic Acid                  |
| 103.1124 | 102.116 | 0.011   | 103.123  | 166 | 52   | 1,5-Pentanediamine              |
| 186.0588 | 163.084 | 0.0149  | 186.0737 | 157 | 100  | N,N-Bis(2-Hydroxyethyl)Glycine  |
| 84.0822  | 102.092 | -0.0014 | 84.0808  | 257 | 54.2 | Betaine Aldehyde Cation         |
| 84.0822  | 102.092 | -0.0014 | 84.0808  | 187 | 52   | Betaine Aldehyde Cation         |
| 84.0822  | 102.092 | -0.0014 | 84.0808  | 197 | 55.4 | Betaine Aldehyde Cation         |
| 106.0872 | 105     | 0       | 106.09   | 159 | 73.7 | Diethanolamine                  |

|          |         |         |          |     |      |                                       |
|----------|---------|---------|----------|-----|------|---------------------------------------|
| 106.0872 | 105     | 0       | 106.09   | 171 | 72.3 | Diethanolamine                        |
| 106.0872 | 105     | 0       | 106.09   | 201 | 62.3 | Diethanolamine                        |
| 121.1229 | 60.032  | -0.051  | 121.072  | 20  | 68.7 | Urea                                  |
| 121.1229 | 60.032  | -0.051  | 121.072  | 28  | 77.6 | Urea                                  |
| 121.1229 | 60.058  | -0.0006 | 121.1223 | 2   | 100  | 1-Propanol                            |
| 121.1229 | 60.058  | -0.0006 | 121.1223 | 1   | 100  | 1-Propanol                            |
| 228.1067 | 227.12  | 0.021   | 228.1277 | 116 | 100  | Ametryn                               |
| 103.1124 | 102.068 | -0.037  | 103.0754 | 195 | 78.2 | Pentanoic Acid                        |
| 103.1124 | 102.116 | 0.011   | 103.123  | 218 | 100  | 1,5-Pentanediamine                    |
| 103.1124 | 102.116 | 0.011   | 103.123  | 216 | 100  | 1,5-Pentanediamine                    |
| 106.0872 | 105     | 0       | 106.09   | 158 | 79.3 | Diethanolamine                        |
| 106.0872 | 105     | 0       | 106.09   | 151 | 78.9 | Diethanolamine                        |
| 121.1229 | 60.032  | -0.051  | 121.072  | 20  | 63.5 | Urea                                  |
| 121.1229 | 60.032  | -0.051  | 121.072  | 45  | 82.2 | Urea                                  |
| 121.1229 | 60.058  | -0.0006 | 121.1223 | 2   | 100  | 1-Propanol                            |
| 121.1229 | 60.032  | -0.051  | 121.072  | 59  | 84   | Urea                                  |
| 148.0974 | 147.053 | -0.037  | 148.0604 | 117 | 53.2 | O-Acetyl-L-Serine                     |
| 148.0974 | 147.053 | -0.037  | 148.0604 | 156 | 77.3 | O-Acetyl-L-Serine                     |
| 148.0974 | 147.053 | -0.037  | 148.0604 | 177 | 71.9 | O-Acetyl-L-Serine                     |
| 97.0774  | 114.104 | 0.0238  | 97.1012  | 7   | 100  | Cyclopentanemethanol, .Alpha.-Methyl- |
| 84.0822  | 102.092 | -0.0014 | 84.0808  | 277 | 50   | Betaine Aldehyde Cation               |
| 84.0822  | 102.092 | -0.0014 | 84.0808  | 205 | 51   | Betaine Aldehyde Cation               |
| 84.0822  | 102.092 | -0.0014 | 84.0808  | 164 | 54.2 | Betaine Aldehyde Cation               |
| 84.0822  | 102.092 | -0.0014 | 84.0808  | 148 | 51   | Betaine Aldehyde Cation               |
| 106.0872 | 105     | 0       | 106.09   | 193 | 73.4 | Diethanolamine                        |
| 106.0872 | 105     | 0       | 106.09   | 157 | 73.9 | Diethanolamine                        |
| 106.0872 | 105.079 | -0.0009 | 106.0863 | 128 | 100  | Diethanolamine                        |
| 103.1124 | 102.116 | 0.011   | 103.123  | 106 | 73.2 | 1,5-Pentanediamine                    |
| 84.0822  | 102.092 | -0.0014 | 84.0808  | 194 | 53.1 | Betaine Aldehyde Cation               |
| 84.0822  | 102.092 | -0.0014 | 84.0808  | 192 | 51   | Betaine Aldehyde Cation               |
| 84.0822  | 102.092 | -0.0014 | 84.0808  | 134 | 51   | Betaine Aldehyde Cation               |
| 121.1229 | 60.032  | -0.051  | 121.072  | 26  | 71.7 | Urea                                  |
| 121.1229 | 60.032  | -0.051  | 121.072  | 38  | 77.3 | Urea                                  |
| 121.1229 | 60.058  | -0.0006 | 121.1223 | 3   | 100  | 1-Propanol                            |
| 121.1229 | 60.032  | -0.051  | 121.072  | 38  | 80.2 | Urea                                  |
| 148.0974 | 147.053 | -0.037  | 148.0604 | 116 | 61.8 | O-Acetyl-L-Serine                     |
| 148.0974 | 147.053 | -0.037  | 148.0604 | 159 | 67.3 | O-Acetyl-L-Serine                     |
| 103.1124 | 102.116 | 0.011   | 103.123  | 101 | 81.9 | 1,5-Pentanediamine                    |
| 103.1124 | 102.116 | 0.011   | 103.123  | 222 | 85.2 | 1,5-Pentanediamine                    |
| 97.0774  | 114.104 | 0.0238  | 97.1012  | 17  | 100  | Cyclohexanemethanol                   |
| 106.0872 | 105     | 0       | 106.09   | 222 | 73.8 | Diethanolamine                        |

|          |         |         |          |     |      |                                 |
|----------|---------|---------|----------|-----|------|---------------------------------|
| 106.0872 | 105     | 0       | 106.09   | 159 | 73.4 | Diethanolamine                  |
| 84.0822  | 102.092 | -0.0014 | 84.0808  | 284 | 52   | Betaine Aldehyde Cation         |
| 84.0822  | 102.092 | -0.0014 | 84.0808  | 257 | 50   | Betaine Aldehyde Cation         |
| 84.0822  | 102.092 | -0.0014 | 84.0808  | 231 | 55.4 | Betaine Aldehyde Cation         |
| 228.1067 | 227.12  | 0.021   | 228.1277 | 118 | 100  | Ametryn                         |
| 121.1229 | 60.032  | -0.051  | 121.072  | 14  | 61.5 | Urea                            |
| 121.1229 | 60.032  | -0.051  | 121.072  | 25  | 76.6 | Urea                            |
| 121.1229 | 60.058  | -0.0006 | 121.1223 | 4   | 100  | 1-Propanol                      |
| 121.1229 | 60.032  | -0.051  | 121.072  | 45  | 78.6 | Urea                            |
| 148.0974 | 147.053 | -0.037  | 148.0604 | 106 | 59.9 | O-Acetyl-L-Serine               |
| 148.0974 | 147.053 | -0.037  | 148.0604 | 136 | 100  | O-Acetyl-L-Serine               |
| 148.0974 | 147.053 | -0.037  | 148.0604 | 187 | 75   | O-Acetyl-L-Serine               |
| 106.0872 | 105     | 0       | 106.09   | 158 | 76.1 | Diethanolamine                  |
| 106.0872 | 105     | 0       | 106.09   | 235 | 75.8 | Diethanolamine                  |
| 84.0822  | 102.092 | -0.0014 | 84.0808  | 303 | 52   | Betaine Aldehyde Cation         |
| 84.0822  | 102.092 | -0.0014 | 84.0808  | 239 | 53.1 | Betaine Aldehyde Cation         |
| 84.0822  | 102.092 | -0.0014 | 84.0808  | 139 | 54.2 | Betaine Aldehyde Cation         |
| 84.0822  | 102.092 | -0.0014 | 84.0808  | 186 | 56   | Betaine Aldehyde Cation         |
| 228.1067 | 227.12  | 0.021   | 228.1277 | 104 | 100  | Ametryn                         |
| 121.1229 | 60.032  | -0.051  | 121.072  | 63  | 85.6 | Urea                            |
| 121.1229 | 60.032  | -0.051  | 121.072  | 45  | 80.4 | Urea                            |
| 121.1229 | 60.032  | -0.051  | 121.072  | 46  | 82.2 | Urea                            |
| 121.1229 | 60.032  | -0.051  | 121.072  | 37  | 79.9 | Urea                            |
| 148.0974 | 147     | -0.04   | 148.06   | 25  | 100  | O-Acetyl-L-Serine Hydrochloride |
| 148.0974 | 147.053 | -0.037  | 148.0604 | 165 | 100  | O-Acetyl-L-Serine               |
| 148.0974 | 147.053 | -0.037  | 148.0604 | 142 | 76.6 | O-Acetyl-L-Serine               |
| 97.0774  | 114.104 | 0.0238  | 97.1012  | 25  | 19.9 | Cyclohexanol, 2-Methyl-, Trans- |
| 106.0872 | 105     | 0       | 106.09   | 155 | 74.4 | Diethanolamine                  |
| 106.0872 | 105     | 0       | 106.09   | 183 | 79.3 | Diethanolamine                  |
| 106.0872 | 105.079 | -0.0009 | 106.0863 | 151 | 100  | Diethanolamine                  |
| 121.1229 | 60.032  | -0.051  | 121.072  | 41  | 81.4 | Urea                            |
| 121.1229 | 60.032  | -0.051  | 121.072  | 40  | 80.9 | Urea                            |
| 121.1229 | 60.032  | -0.051  | 121.072  | 44  | 81.9 | Urea                            |
| 103.1124 | 102.068 | -0.037  | 103.0754 | 107 | 100  | Pentanoic Acid                  |
| 103.1124 | 102.116 | 0.011   | 103.123  | 164 | 91.8 | 1,5-Pentanediamine              |
| 84.0822  | 102.092 | -0.0014 | 84.0808  | 191 | 50   | Betaine Aldehyde Cation         |
| 84.0822  | 102.092 | -0.0014 | 84.0808  | 167 | 52   | Betaine Aldehyde Cation         |
| 228.1067 | 227.12  | 0.021   | 228.1277 | 54  | 100  | Ametryn                         |
| 103.1124 | 102.116 | 0.011   | 103.123  | 104 | 63.5 | 1,5-Pentanediamine              |
| 103.1124 | 102.116 | 0.011   | 103.123  | 217 | 100  | 1,5-Pentanediamine              |
| 103.1124 | 102.116 | 0.011   | 103.123  | 227 | 100  | 1,5-Pentanediamine              |



|          |         |         |          |     |      |                                              |
|----------|---------|---------|----------|-----|------|----------------------------------------------|
| 371.2569 | 370.214 | -0.0352 | 371.2217 | 74  | 32.4 | 17-Phenyltrnor-13,14-Dihydroprostaglandin A2 |
| 371.2569 | 370.222 | -0.028  | 371.2289 | 46  | 55.4 | Pyroglu-Ile-Lys                              |
| 371.2569 | 370.214 | -0.0352 | 371.2217 | 57  | 100  | 17-Phenyltrnor-13,14-Dihydroprostaglandin A2 |
| 186.0588 | 370.196 | 0.0467  | 186.1055 | 60  | 100  | Ser-His-Lys                                  |
| 106.0872 | 105     | 0       | 106.09   | 159 | 78.6 | Diethanolamine                               |
| 106.0872 | 105     | 0       | 106.09   | 157 | 78.9 | Diethanolamine                               |
| 106.0872 | 105     | 0       | 106.09   | 174 | 79.9 | Diethanolamine                               |
| 84.0822  | 102.092 | -0.0014 | 84.0808  | 317 | 52   | Betaine Aldehyde Cation                      |
| 84.0822  | 102.092 | -0.0014 | 84.0808  | 256 | 50   | Betaine Aldehyde Cation                      |
| 84.0822  | 102.092 | -0.0014 | 84.0808  | 200 | 54.2 | Betaine Aldehyde Cation                      |
| 228.1067 | 227.12  | 0.021   | 228.1277 | 114 | 100  | Ametryn                                      |
| 121.1229 | 60.032  | -0.051  | 121.072  | 26  | 73.2 | Urea                                         |
| 121.1229 | 60.032  | -0.051  | 121.072  | 53  | 83.3 | Urea                                         |
| 121.1229 | 60.058  | -0.0006 | 121.1223 | 2   | 100  | 1-Propanol                                   |
| 121.1229 | 60.032  | -0.051  | 121.072  | 41  | 80.9 | Urea                                         |
| 148.0974 | 147.053 | -0.037  | 148.0604 | 158 | 100  | O-Acetyl-L-Serine                            |
| 97.0774  | 114.104 | 0.0238  | 97.1012  | 50  | 33.9 | Cyclohexanol, 1-Methyl-                      |
| 106.0872 | 105.079 | -0.0009 | 106.0863 | 119 | 100  | Diethanolamine                               |
| 228.1067 | 227.12  | 0.021   | 228.1277 | 70  | 100  | Ametryn                                      |
| 121.1229 | 60.032  | -0.051  | 121.072  | 47  | 82.7 | Urea                                         |
| 121.1229 | 60.032  | -0.051  | 121.072  | 40  | 80.9 | Urea                                         |
| 121.1229 | 60.058  | -0.0006 | 121.1223 | 1   | 100  | 1-Propanol                                   |
| 121.1229 | 60.032  | -0.051  | 121.072  | 45  | 82.2 | Urea                                         |
| 106.0872 | 105     | 0       | 106.09   | 169 | 75   | Diethanolamine                               |
| 106.0872 | 105     | 0       | 106.09   | 157 | 75   | Diethanolamine                               |
| 106.0872 | 105.079 | -0.0009 | 106.0863 | 156 | 100  | Diethanolamine                               |
| 84.0822  | 102.092 | -0.0014 | 84.0808  | 293 | 52   | Betaine Aldehyde Cation                      |
| 84.0822  | 102.092 | -0.0014 | 84.0808  | 234 | 52   | Betaine Aldehyde Cation                      |
| 84.0822  | 102.092 | -0.0014 | 84.0808  | 231 | 52   | Betaine Aldehyde Cation                      |
| 103.1124 | 102.116 | 0.011   | 103.123  | 127 | 87.3 | 1,5-Pentanediamine                           |
| 103.1124 | 102.068 | -0.037  | 103.0754 | 93  | 100  | Pentanoic Acid                               |
| 118.0873 | 117     | 0       | 118.09   | 263 | 30.2 | Betaine                                      |
| 118.0873 | 117.079 | -0.001  | 118.0863 | 257 | 59.8 | Betaine                                      |
| 118.0873 | 117.079 | -0.001  | 118.0863 | 345 | 48.4 | Betaine                                      |
| 186.0588 | 163.084 | 0.0149  | 186.0737 | 156 | 100  | N,N-Bis(2-Hydroxyethyl)Glycine               |
| 186.0588 | 370.196 | 0.0467  | 186.1055 | 86  | 100  | Ser-His-Lys                                  |
| 186.0588 | 163.084 | 0.0149  | 186.0737 | 150 | 100  | N,N-Bis(2-Hydroxyethyl)Glycine               |
| 84.0822  | 102.092 | -0.0014 | 84.0808  | 196 | 52   | Betaine Aldehyde Cation                      |
| 84.0822  | 102.092 | -0.0014 | 84.0808  | 179 | 53.1 | Betaine Aldehyde Cation                      |
| 84.0822  | 102.092 | -0.0014 | 84.0808  | 183 | 50   | Betaine Aldehyde Cation                      |

|          |         |         |          |     |      |                                       |
|----------|---------|---------|----------|-----|------|---------------------------------------|
| 118.0873 | 117.079 | -0.001  | 118.0863 | 454 | 73.9 | Betaine                               |
| 118.0873 | 117.079 | -0.001  | 118.0863 | 324 | 79.5 | Betaine                               |
| 118.0873 | 117.079 | -0.001  | 118.0863 | 366 | 62.6 | Betaine                               |
| 97.0774  | 114.104 | 0.0238  | 97.1012  | 45  | 26.4 | Cyclohexanol, 1-Methyl-               |
| 97.0774  | 114.104 | 0.0238  | 97.1012  | 28  | 22.2 | Cycloheptanol                         |
| 106.0872 | 105     | 0       | 106.09   | 159 | 74.6 | Diethanolamine                        |
| 186.0588 | 370.196 | 0.0467  | 186.1055 | 39  | 100  | Ser-His-Lys                           |
| 186.0588 | 163.084 | 0.0149  | 186.0737 | 165 | 93.8 | N,N-Bis(2-Hydroxyethyl)Glycine        |
| 224.1293 | 446.228 | -0.0081 | 224.1212 | 87  | 64.7 | Tyr-His-Lys                           |
| 224.1293 | 223.084 | -0.0376 | 224.0917 | 218 | 93.1 | N-Acetyl-L-Tyrosine                   |
| 224.1293 | 223.084 | -0.0376 | 224.0917 | 300 | 88.4 | N-Acetyl-L-Tyrosine                   |
| 118.0873 | 117.079 | -0.001  | 118.0863 | 392 | 72.2 | Betaine                               |
| 118.0873 | 117.079 | -0.001  | 118.0863 | 257 | 65.1 | Betaine                               |
| 118.0873 | 117.079 | -0.001  | 118.0863 | 268 | 40.1 | Betaine                               |
| 97.0774  | 114.104 | 0.0238  | 97.1012  | 71  | 25.7 | Cyclohexanol, 1-Methyl-               |
| 186.0588 | 370.196 | 0.0467  | 186.1055 | 55  | 35.3 | Ser-His-Lys                           |
| 186.0588 | 370.196 | 0.0467  | 186.1055 | 50  | 100  | Ser-His-Lys                           |
| 224.1293 | 223.1   | -0.022  | 224.107  | 159 | 100  | N-Fluorenylacetamide                  |
| 224.1293 | 223.084 | -0.0376 | 224.0917 | 146 | 51   | N-Acetyl-L-Tyrosine                   |
| 224.1293 | 223.084 | -0.0376 | 224.0917 | 254 | 93.8 | N-Acetyl-L-Tyrosine                   |
| 224.1293 | 223.084 | -0.0376 | 224.0917 | 279 | 91.5 | N-Acetyl-L-Tyrosine                   |
| 125.9874 | 125     | 0.04    | 126.03   | 169 | 91.8 | 2-Aminoethylphosphonic Acid           |
| 125.9874 | 125     | 0.04    | 126.03   | 151 | 100  | 2-Aminoethylphosphonic Acid           |
| 125.9874 | 125     | 0.04    | 126.03   | 145 | 100  | 2-Aminoethylphosphonic Acid           |
| 186.0588 | 163.084 | 0.0149  | 186.0737 | 183 | 89   | N,N-Bis(2-Hydroxyethyl)Glycine        |
| 97.0774  | 114.104 | 0.0238  | 97.1012  | 45  | 55.1 | Cyclohexanol, 4-Methyl-, Trans-       |
| 167.0138 | 166.049 | 0.0426  | 167.0564 | 272 | 91.3 | 7-Methylxanthine                      |
| 167.0138 | 166.049 | 0.0426  | 167.0564 | 280 | 96.3 | 7-Methylxanthine                      |
| 167.0138 | 166.049 | 0.0426  | 167.0564 | 264 | 90.9 | 7-Methylxanthine                      |
| 167.0138 | 166.049 | 0.0426  | 167.0564 | 329 | 96.2 | 7-Methylxanthine                      |
| 118.0873 | 117.079 | -0.001  | 118.0863 | 206 | 100  | Betaine                               |
| 118.0873 | 117.079 | -0.001  | 118.0863 | 479 | 68.2 | Betaine                               |
| 118.0873 | 117.079 | -0.001  | 118.0863 | 298 | 60.8 | Betaine                               |
| 118.0873 | 117.079 | -0.001  | 118.0863 | 345 | 42.1 | Betaine                               |
| 186.0588 | 163.084 | 0.0149  | 186.0737 | 138 | 85.9 | N,N-Bis(2-Hydroxyethyl)Glycine        |
| 97.0774  | 114.104 | 0.0238  | 97.1012  | 33  | 100  | Cyclopentanemethanol, .Alpha.-Methyl- |
| 97.0774  | 114.104 | 0.0238  | 97.1012  | 29  | 23.8 | Cyclohexanol, 1-Methyl-               |
| 118.0873 | 117.079 | -0.001  | 118.0863 | 367 | 29.5 | Betaine                               |
| 118.0873 | 117.079 | -0.001  | 118.0863 | 508 | 74.5 | Betaine                               |
| 118.0873 | 117.079 | -0.001  | 118.0863 | 302 | 66.9 | Betaine                               |
| 118.0873 | 117.079 | -0.001  | 118.0863 | 293 | 71.8 | Betaine                               |

|          |         |         |          |     |      |                                 |
|----------|---------|---------|----------|-----|------|---------------------------------|
| 186.0588 | 203.091 | 0.0285  | 186.0873 | 61  | 84.7 | Ala-Asn                         |
| 186.0588 | 163.084 | 0.0149  | 186.0737 | 148 | 100  | N,N-Bis(2-Hydroxyethyl)Glycine  |
| 224.1293 | 446.228 | -0.0081 | 224.1212 | 115 | 88   | Tyr-His-Lys                     |
| 224.1293 | 223.084 | -0.0376 | 224.0917 | 296 | 94.1 | N-Acetyl-L-Tyrosine             |
| 224.1293 | 223.084 | -0.0376 | 224.0917 | 275 | 81.5 | N-Acetyl-L-Tyrosine             |
| 118.0873 | 117.079 | -0.001  | 118.0863 | 335 | 48.9 | Betaine                         |
| 118.0873 | 117.079 | -0.001  | 118.0863 | 387 | 56.3 | Betaine                         |
| 118.0873 | 117.079 | -0.001  | 118.0863 | 316 | 83.4 | Betaine                         |
| 118.0873 | 117.079 | -0.001  | 118.0863 | 319 | 62.9 | Betaine                         |
| 186.0588 | 163.084 | 0.0149  | 186.0737 | 134 | 100  | N,N-Bis(2-Hydroxyethyl)Glycine  |
| 186.0588 | 370.196 | 0.0467  | 186.1055 | 55  | 52   | Ser-His-Lys                     |
| 186.0588 | 370.196 | 0.0467  | 186.1055 | 59  | 100  | Ser-His-Lys                     |
| 118.0873 | 117.079 | -0.001  | 118.0863 | 265 | 100  | Betaine                         |
| 118.0873 | 117.079 | -0.001  | 118.0863 | 444 | 62.9 | Betaine                         |
| 118.0873 | 117.079 | -0.001  | 118.0863 | 207 | 67.7 | Betaine                         |
| 118.0873 | 117.079 | -0.001  | 118.0863 | 291 | 59.3 | Betaine                         |
| 186.0588 | 163.084 | 0.0149  | 186.0737 | 147 | 100  | N,N-Bis(2-Hydroxyethyl)Glycine  |
| 186.0588 | 163.084 | 0.0149  | 186.0737 | 147 | 100  | N,N-Bis(2-Hydroxyethyl)Glycine  |
| 97.0774  | 114.104 | 0.0238  | 97.1012  | 22  | 33.6 | Cyclohexanol, 2-Methyl-, Trans- |
| 140.0692 | 139.1   | 0.038   | 140.107  | 96  | 100  | Tropinone                       |
| 118.0873 | 117.079 | -0.001  | 118.0863 | 329 | 42.2 | Betaine                         |
| 118.0873 | 117.079 | -0.001  | 118.0863 | 378 | 76.4 | Betaine                         |
| 118.0873 | 117.079 | -0.001  | 118.0863 | 279 | 69.3 | Betaine                         |
| 118.0873 | 117.079 | -0.001  | 118.0863 | 355 | 61.4 | Betaine                         |
| 186.0588 | 163.084 | 0.0149  | 186.0737 | 172 | 100  | N,N-Bis(2-Hydroxyethyl)Glycine  |
| 186.0588 | 163.084 | 0.0149  | 186.0737 | 157 | 84.9 | N,N-Bis(2-Hydroxyethyl)Glycine  |
| 186.0588 | 163.084 | 0.0149  | 186.0737 | 139 | 100  | N,N-Bis(2-Hydroxyethyl)Glycine  |
| 195.1236 | 194.115 | -0.0009 | 195.1227 | 280 | 98.4 | Tetraethylene Glycol            |
| 195.1236 | 194.115 | -0.0009 | 195.1227 | 241 | 100  | Tetraethylene Glycol            |
| 118.0873 | 117     | 0       | 118.09   | 339 | 24.1 | Betaine                         |
| 118.0873 | 117.079 | -0.001  | 118.0863 | 506 | 68.9 | Betaine                         |
| 118.0873 | 117.079 | -0.001  | 118.0863 | 169 | 61.4 | Betaine                         |
| 118.0873 | 117.079 | -0.001  | 118.0863 | 283 | 65.8 | Betaine                         |
| 186.0588 | 163.084 | 0.0149  | 186.0737 | 203 | 92.3 | N,N-Bis(2-Hydroxyethyl)Glycine  |
| 186.0588 | 163.084 | 0.0149  | 186.0737 | 161 | 94   | N,N-Bis(2-Hydroxyethyl)Glycine  |
| 140.0692 | 139.063 | 0.0014  | 140.0706 | 55  | 100  | 5-Amino-2-Methoxyphenol         |
| 224.1293 | 223.1   | -0.022  | 224.107  | 138 | 76.6 | N-Fluorenylacetamide            |
| 224.1293 | 446.228 | -0.0081 | 224.1212 | 134 | 49.4 | Tyr-His-Lys                     |
| 224.1293 | 223.084 | -0.0376 | 224.0917 | 204 | 87.1 | N-Acetyl-L-Tyrosine             |
| 224.1293 | 223.084 | -0.0376 | 224.0917 | 274 | 91.7 | N-Acetyl-L-Tyrosine             |
| 118.0873 | 117.079 | -0.001  | 118.0863 | 215 | 80.1 | Betaine                         |

|          |         |         |          |     |      |                                |
|----------|---------|---------|----------|-----|------|--------------------------------|
| 118.0873 | 117.079 | -0.001  | 118.0863 | 423 | 77.2 | Betaine                        |
| 118.0873 | 117.079 | -0.001  | 118.0863 | 350 | 87   | Betaine                        |
| 118.0873 | 117.079 | -0.001  | 118.0863 | 293 | 81.6 | Betaine                        |
| 186.0588 | 163.084 | 0.0149  | 186.0737 | 168 | 100  | N,N-Bis(2-Hydroxyethyl)Glycine |
| 186.0588 | 163.084 | 0.0149  | 186.0737 | 141 | 100  | N,N-Bis(2-Hydroxyethyl)Glycine |
| 224.1293 | 223.084 | -0.0376 | 224.0917 | 203 | 76   | N-Acetyl-L-Tyrosine            |
| 224.1293 | 223.084 | -0.0376 | 224.0917 | 214 | 100  | N-Acetyl-L-Tyrosine            |
| 224.1293 | 223.084 | -0.0376 | 224.0917 | 314 | 86.1 | N-Acetyl-L-Tyrosine            |
| 118.0873 | 117.079 | -0.001  | 118.0863 | 245 | 87.3 | Betaine                        |
| 118.0873 | 117     | 0       | 118.09   | 359 | 33.3 | Betaine                        |
| 118.0873 | 117.079 | -0.001  | 118.0863 | 316 | 71.8 | Betaine                        |
| 186.0588 | 163.084 | 0.0149  | 186.0737 | 137 | 100  | N,N-Bis(2-Hydroxyethyl)Glycine |
| 186.0588 | 163.084 | 0.0149  | 186.0737 | 157 | 100  | N,N-Bis(2-Hydroxyethyl)Glycine |
| 224.1293 | 223.1   | -0.022  | 224.107  | 166 | 96.6 | N-Fluorenylacetamide           |
| 224.1293 | 223.084 | -0.0376 | 224.0917 | 123 | 39.4 | N-Acetyl-L-Tyrosine            |
| 224.1293 | 223.084 | -0.0376 | 224.0917 | 258 | 79.9 | N-Acetyl-L-Tyrosine            |
| 224.1293 | 446.228 | -0.0081 | 224.1212 | 186 | 49.5 | Tyr-His-Lys                    |
| 118.0873 | 117.079 | -0.001  | 118.0863 | 303 | 78.1 | Betaine                        |
| 118.0873 | 117.079 | -0.001  | 118.0863 | 482 | 65   | Betaine                        |
| 118.0873 | 117.079 | -0.001  | 118.0863 | 234 | 66.3 | Betaine                        |
| 118.0873 | 117.079 | -0.001  | 118.0863 | 215 | 68.6 | Betaine                        |
| 186.0588 | 370.196 | 0.0467  | 186.1055 | 92  | 43.2 | Ser-His-Lys                    |
| 140.0692 | 139.1   | 0.038   | 140.107  | 45  | 41.8 | Tropinone                      |
| 97.0774  | 114.104 | 0.0238  | 97.1012  | 21  | 21   | Cyclohexanol, 1-Methyl-        |
| 224.1293 | 223.1   | -0.022  | 224.107  | 165 | 79.2 | N-Fluorenylacetamide           |
| 224.1293 | 446.228 | -0.0081 | 224.1212 | 145 | 50.1 | Tyr-His-Lys                    |
| 224.1293 | 223.084 | -0.0376 | 224.0917 | 169 | 92.3 | N-Acetyl-L-Tyrosine            |
| 224.1293 | 223.084 | -0.0376 | 224.0917 | 303 | 76.5 | N-Acetyl-L-Tyrosine            |
| 118.0873 | 117.079 | -0.001  | 118.0863 | 279 | 63.6 | Betaine                        |
| 118.0873 | 117.079 | -0.001  | 118.0863 | 519 | 69.9 | Betaine                        |
| 118.0873 | 117.079 | -0.001  | 118.0863 | 340 | 84   | Betaine                        |
| 118.0873 | 117.079 | -0.001  | 118.0863 | 264 | 98.3 | Betaine                        |
| 186.0588 | 163.084 | 0.0149  | 186.0737 | 165 | 87.2 | N,N-Bis(2-Hydroxyethyl)Glycine |
| 186.0588 | 163.084 | 0.0149  | 186.0737 | 138 | 100  | N,N-Bis(2-Hydroxyethyl)Glycine |
| 224.1293 | 223.106 | -0.0164 | 224.1129 | 88  | 100  | N-Acetyl-D-Galactosaminitol    |
| 224.1293 | 223.084 | -0.0376 | 224.0917 | 103 | 100  | N-Acetyl-L-Tyrosine            |
| 224.1293 | 223.084 | -0.0376 | 224.0917 | 295 | 93.4 | N-Acetyl-L-Tyrosine            |
| 224.1293 | 223.084 | -0.0376 | 224.0917 | 336 | 84.5 | N-Acetyl-L-Tyrosine            |
| 118.0873 | 117.079 | -0.001  | 118.0863 | 338 | 54.8 | Betaine                        |
| 118.0873 | 117.079 | -0.001  | 118.0863 | 499 | 46   | Betaine                        |
| 118.0873 | 117.079 | -0.001  | 118.0863 | 372 | 62.9 | Betaine                        |

|          |         |         |          |     |      |                                               |
|----------|---------|---------|----------|-----|------|-----------------------------------------------|
| 118.0873 | 117.079 | -0.001  | 118.0863 | 182 | 64.6 | Betaine                                       |
| 186.0588 | 163.084 | 0.0149  | 186.0737 | 150 | 100  | N,N-Bis(2-Hydroxyethyl)Glycine                |
| 224.1293 | 223.084 | -0.0376 | 224.0917 | 193 | 79.9 | N-Acetyl-L-Tyrosine                           |
| 224.1293 | 223.084 | -0.0376 | 224.0917 | 279 | 95.8 | N-Acetyl-L-Tyrosine                           |
| 224.1293 | 223.084 | -0.0376 | 224.0917 | 320 | 88.7 | N-Acetyl-L-Tyrosine                           |
| 118.0873 | 117.079 | -0.001  | 118.0863 | 358 | 31.6 | Betaine                                       |
| 118.0873 | 117.079 | -0.001  | 118.0863 | 472 | 58.2 | Betaine                                       |
| 118.0873 | 117.079 | -0.001  | 118.0863 | 289 | 70.2 | Betaine                                       |
| 118.0873 | 117.079 | -0.001  | 118.0863 | 358 | 70.1 | Betaine                                       |
| 186.0588 | 163.084 | 0.0149  | 186.0737 | 141 | 90.4 | N,N-Bis(2-Hydroxyethyl)Glycine                |
| 186.0588 | 370.196 | 0.0467  | 186.1055 | 48  | 100  | Ser-His-Lys                                   |
| 224.1293 | 223.1   | -0.022  | 224.107  | 154 | 100  | N-Fluorenylacetamide                          |
| 224.1293 | 223.084 | -0.0376 | 224.0917 | 168 | 51.6 | N-Acetyl-L-Tyrosine                           |
| 224.1293 | 223.084 | -0.0376 | 224.0917 | 141 | 78.6 | N-Acetyl-L-Tyrosine                           |
| 224.1293 | 223.084 | -0.0376 | 224.0917 | 156 | 58.6 | N-Acetyl-L-Tyrosine                           |
| 118.0873 | 117.079 | -0.001  | 118.0863 | 296 | 37.6 | Betaine                                       |
| 118.0873 | 117.079 | -0.001  | 118.0863 | 482 | 63.3 | Betaine                                       |
| 118.0873 | 117.079 | -0.001  | 118.0863 | 321 | 85.2 | Betaine                                       |
| 118.0873 | 117.079 | -0.001  | 118.0863 | 253 | 44.6 | Betaine                                       |
| 186.0588 | 163.084 | 0.0149  | 186.0737 | 158 | 92.3 | N,N-Bis(2-Hydroxyethyl)Glycine                |
| 140.0692 | 139.027 | -0.035  | 140.0342 | 120 | 55.4 | 3-Pyridinecarboxylic Acid, 1,6-Dihydro-6-Oxo- |
| 97.0774  | 114.104 | 0.0238  | 97.1012  | 31  | 20.2 | Cyclohexanemethanol                           |
| 224.1293 | 223.1   | -0.022  | 224.107  | 143 | 100  | N-Fluorenylacetamide                          |
| 224.1293 | 223.084 | -0.0376 | 224.0917 | 221 | 52.8 | N-Acetyl-L-Tyrosine                           |
| 224.1293 | 223.084 | -0.0376 | 224.0917 | 291 | 95.6 | N-Acetyl-L-Tyrosine                           |
| 224.1293 | 223.084 | -0.0376 | 224.0917 | 278 | 72   | N-Acetyl-L-Tyrosine                           |
| 118.0873 | 117.079 | -0.001  | 118.0863 | 421 | 71.1 | Betaine                                       |
| 118.0873 | 117.079 | -0.001  | 118.0863 | 517 | 67   | Betaine                                       |
| 118.0873 | 117.079 | -0.001  | 118.0863 | 288 | 67.9 | Betaine                                       |
| 118.0873 | 117.079 | -0.001  | 118.0863 | 373 | 72.5 | Betaine                                       |
| 186.0588 | 163.084 | 0.0149  | 186.0737 | 141 | 85.9 | N,N-Bis(2-Hydroxyethyl)Glycine                |
| 140.0692 | 139.063 | 0.0014  | 140.0706 | 89  | 100  | 5-Amino-2-Methoxyphenol                       |
| 224.1293 | 223.106 | -0.0164 | 224.1129 | 97  | 100  | N-Acetyl-D-Galactosaminitol                   |
| 224.1293 | 446.228 | -0.0081 | 224.1212 | 94  | 36.8 | Tyr-His-Lys                                   |
| 224.1293 | 223.084 | -0.0376 | 224.0917 | 215 | 87.8 | N-Acetyl-L-Tyrosine                           |
| 224.1293 | 223.084 | -0.0376 | 224.0917 | 273 | 82.7 | N-Acetyl-L-Tyrosine                           |
| 118.0873 | 117.079 | -0.001  | 118.0863 | 435 | 97.3 | Betaine                                       |
| 118.0873 | 117.079 | -0.001  | 118.0863 | 385 | 97   | Betaine                                       |
| 118.0873 | 117.079 | -0.001  | 118.0863 | 305 | 73.6 | Betaine                                       |
| 186.0588 | 163.084 | 0.0149  | 186.0737 | 122 | 81.3 | N,N-Bis(2-Hydroxyethyl)Glycine                |
| 186.0588 | 163.084 | 0.0149  | 186.0737 | 155 | 100  | N,N-Bis(2-Hydroxyethyl)Glycine                |

|          |         |         |          |     |      |                                |
|----------|---------|---------|----------|-----|------|--------------------------------|
| 224.1293 | 446.228 | -0.0081 | 224.1212 | 154 | 45.8 | Tyr-His-Lys                    |
| 224.1293 | 223.084 | -0.0376 | 224.0917 | 320 | 94.9 | N-Acetyl-L-Tyrosine            |
| 224.1293 | 223.084 | -0.0376 | 224.0917 | 137 | 58.6 | N-Acetyl-L-Tyrosine            |
| 118.0873 | 117.079 | -0.001  | 118.0863 | 188 | 100  | Betaine                        |
| 118.0873 | 117.079 | -0.001  | 118.0863 | 426 | 73.8 | Betaine                        |
| 118.0873 | 117.079 | -0.001  | 118.0863 | 307 | 74.9 | Betaine                        |
| 118.0873 | 117.079 | -0.001  | 118.0863 | 450 | 98.7 | Betaine                        |
| 186.0588 | 163.084 | 0.0149  | 186.0737 | 110 | 100  | N,N-Bis(2-Hydroxyethyl)Glycine |
| 97.0774  | 114.104 | 0.0238  | 97.1012  | 50  | 25.9 | Cyclohexanol, 1-Methyl-        |
| 97.0774  | 114.104 | 0.0238  | 97.1012  | 30  | 23.8 | Cyclohexanol, 1-Methyl-        |
| 224.1293 | 223.1   | -0.022  | 224.107  | 171 | 100  | N-Fluorenylacetamide           |
| 224.1293 | 223.084 | -0.0376 | 224.0917 | 179 | 48.5 | N-Acetyl-L-Tyrosine            |
| 224.1293 | 223.084 | -0.0376 | 224.0917 | 354 | 91.2 | N-Acetyl-L-Tyrosine            |
| 224.1293 | 223.084 | -0.0376 | 224.0917 | 236 | 78.9 | N-Acetyl-L-Tyrosine            |
| 118.0873 | 117.079 | -0.001  | 118.0863 | 220 | 69.2 | Betaine                        |
| 118.0873 | 117.079 | -0.001  | 118.0863 | 498 | 67.3 | Betaine                        |
| 118.0873 | 117.079 | -0.001  | 118.0863 | 292 | 73.6 | Betaine                        |
| 118.0873 | 117.079 | -0.001  | 118.0863 | 296 | 49.5 | Betaine                        |
| 186.0588 | 370.196 | 0.0467  | 186.1055 | 54  | 100  | Ser-His-Lys                    |
| 97.0774  | 114.104 | 0.0238  | 97.1012  | 37  | 26.6 | Cyclohexanol, 1-Methyl-        |
| 224.1293 | 223.1   | -0.022  | 224.107  | 151 | 100  | N-Fluorenylacetamide           |
| 224.1293 | 223.084 | -0.0376 | 224.0917 | 205 | 80.4 | N-Acetyl-L-Tyrosine            |
| 224.1293 | 223.084 | -0.0376 | 224.0917 | 262 | 93.7 | N-Acetyl-L-Tyrosine            |
| 224.1293 | 223.084 | -0.0376 | 224.0917 | 294 | 89.1 | N-Acetyl-L-Tyrosine            |
| 118.0873 | 117.079 | -0.001  | 118.0863 | 573 | 78   | Betaine                        |
| 118.0873 | 117.079 | -0.001  | 118.0863 | 252 | 80.8 | Betaine                        |
| 118.0873 | 117.079 | -0.001  | 118.0863 | 360 | 75.3 | Betaine                        |
| 186.0588 | 203.091 | 0.0285  | 186.0873 | 70  | 72.7 | Ala-Asn                        |
| 186.0588 | 370.196 | 0.0467  | 186.1055 | 58  | 100  | Ser-His-Lys                    |
| 97.0774  | 114.104 | 0.0238  | 97.1012  | 39  | 21.9 | Cyclohexanol, 1-Methyl-        |
| 224.1293 | 223.1   | -0.022  | 224.107  | 124 | 100  | N-Fluorenylacetamide           |
| 224.1293 | 223.084 | -0.0376 | 224.0917 | 174 | 47.6 | N-Acetyl-L-Tyrosine            |
| 224.1293 | 223.084 | -0.0376 | 224.0917 | 311 | 95.9 | N-Acetyl-L-Tyrosine            |
| 224.1293 | 223.084 | -0.0376 | 224.0917 | 273 | 86.4 | N-Acetyl-L-Tyrosine            |
| 118.0873 | 117.079 | -0.001  | 118.0863 | 60  | 83   | 5-Aminovaleric Acid            |
| 118.0873 | 117.079 | -0.001  | 118.0863 | 499 | 69   | Betaine                        |
| 118.0873 | 117.079 | -0.001  | 118.0863 | 354 | 83.8 | Betaine                        |
| 118.0873 | 117.079 | -0.001  | 118.0863 | 331 | 68.7 | Betaine                        |
| 186.0588 | 203.091 | 0.0285  | 186.0873 | 70  | 100  | Ala-Asn                        |
| 186.0588 | 370.196 | 0.0467  | 186.1055 | 68  | 100  | Ser-His-Lys                    |
| 97.0774  | 114.104 | 0.0238  | 97.1012  | 48  | 26.3 | Cyclohexanol, 1-Methyl-        |

|          |         |         |          |     |      |                                |
|----------|---------|---------|----------|-----|------|--------------------------------|
| 97.0774  | 114.104 | 0.0238  | 97.1012  | 38  | 25.3 | Cyclohexanol, 1-Methyl-        |
| 224.1293 | 223.1   | -0.022  | 224.107  | 157 | 84   | N-Fluorenylacetamide           |
| 224.1293 | 223.084 | -0.0376 | 224.0917 | 126 | 56.6 | N-Acetyl-L-Tyrosine            |
| 224.1293 | 223.084 | -0.0376 | 224.0917 | 257 | 100  | N-Acetyl-L-Tyrosine            |
| 224.1293 | 223.084 | -0.0376 | 224.0917 | 265 | 88.3 | N-Acetyl-L-Tyrosine            |
| 118.0873 | 117.079 | -0.001  | 118.0863 | 342 | 72.3 | Betaine                        |
| 118.0873 | 117.079 | -0.001  | 118.0863 | 430 | 43.8 | Betaine                        |
| 118.0873 | 117.079 | -0.001  | 118.0863 | 295 | 78.8 | Betaine                        |
| 118.0873 | 117.079 | -0.001  | 118.0863 | 265 | 72.3 | Betaine                        |
| 186.0588 | 163.084 | 0.0149  | 186.0737 | 179 | 100  | N,N-Bis(2-Hydroxyethyl)Glycine |
| 186.0588 | 163.084 | 0.0149  | 186.0737 | 150 | 87.5 | N,N-Bis(2-Hydroxyethyl)Glycine |
| 186.0588 | 163.084 | 0.0149  | 186.0737 | 154 | 100  | N,N-Bis(2-Hydroxyethyl)Glycine |
| 140.0692 | 139     | 0.04    | 140.11   | 51  | 100  | Tropinone                      |
| 97.0774  | 114.104 | 0.0238  | 97.1012  | 69  | 20.1 | Cyclohexanemethanol            |
| 224.1293 | 446.228 | -0.0081 | 224.1212 | 167 | 46.8 | Tyr-His-Lys                    |
| 224.1293 | 223.084 | -0.0376 | 224.0917 | 181 | 87.5 | N-Acetyl-L-Tyrosine            |
| 224.1293 | 223.084 | -0.0376 | 224.0917 | 288 | 86.9 | N-Acetyl-L-Tyrosine            |
| 118.0873 | 117.079 | -0.001  | 118.0863 | 313 | 66.2 | Betaine                        |
| 118.0873 | 117.079 | -0.001  | 118.0863 | 439 | 44.1 | Betaine                        |
| 118.0873 | 117.079 | -0.001  | 118.0863 | 372 | 59.1 | Betaine                        |
| 118.0873 | 117.079 | -0.001  | 118.0863 | 291 | 44   | Betaine                        |
| 186.0588 | 370.196 | 0.0467  | 186.1055 | 105 | 100  | Ser-His-Lys                    |
| 186.0588 | 163.084 | 0.0149  | 186.0737 | 149 | 100  | N,N-Bis(2-Hydroxyethyl)Glycine |
| 140.0692 | 139.063 | 0.0014  | 140.0706 | 30  | 100  | 5-Amino-2-Methoxyphenol        |
| 97.0774  | 114.104 | 0.0238  | 97.1012  | 69  | 23.8 | Cyclohexanol, 1-Methyl-        |
| 195.1236 | 194.115 | -0.0009 | 195.1227 | 276 | 100  | Tetraethylene Glycol           |
| 195.1236 | 194.115 | -0.0009 | 195.1227 | 278 | 100  | Tetraethylene Glycol           |
| 195.1236 | 194.115 | -0.0009 | 195.1227 | 261 | 100  | Tetraethylene Glycol           |
| 118.0873 | 117.079 | -0.001  | 118.0863 | 246 | 100  | Betaine                        |
| 118.0873 | 117.079 | -0.001  | 118.0863 | 443 | 34.9 | Betaine                        |
| 118.0873 | 117.079 | -0.001  | 118.0863 | 372 | 100  | Betaine                        |
| 118.0873 | 117.079 | -0.001  | 118.0863 | 264 | 75.6 | Betaine                        |
| 186.0588 | 163.084 | 0.0149  | 186.0737 | 132 | 80.4 | N,N-Bis(2-Hydroxyethyl)Glycine |
| 186.0588 | 163.084 | 0.0149  | 186.0737 | 150 | 91.4 | N,N-Bis(2-Hydroxyethyl)Glycine |
| 186.0588 | 370.196 | 0.0467  | 186.1055 | 54  | 100  | Ser-His-Lys                    |
| 186.0588 | 163.084 | 0.0149  | 186.0737 | 176 | 100  | N,N-Bis(2-Hydroxyethyl)Glycine |
| 224.1293 | 223.1   | -0.022  | 224.107  | 143 | 83.1 | N-Fluorenylacetamide           |
| 224.1293 | 223.084 | -0.0376 | 224.0917 | 160 | 45.6 | N-Acetyl-L-Tyrosine            |
| 224.1293 | 223.084 | -0.0376 | 224.0917 | 165 | 100  | N-Acetyl-L-Tyrosine            |
| 224.1293 | 223.084 | -0.0376 | 224.0917 | 312 | 94.2 | N-Acetyl-L-Tyrosine            |
| 118.0873 | 117.079 | -0.001  | 118.0863 | 558 | 97.9 | Betaine                        |

|          |         |         |          |     |      |                                |
|----------|---------|---------|----------|-----|------|--------------------------------|
| 118.0873 | 117.079 | -0.001  | 118.0863 | 235 | 76.5 | Betaine                        |
| 118.0873 | 117.079 | -0.001  | 118.0863 | 270 | 70.2 | Betaine                        |
| 186.0588 | 163.084 | 0.0149  | 186.0737 | 167 | 100  | N,N-Bis(2-Hydroxyethyl)Glycine |
| 224.1293 | 223.084 | -0.0376 | 224.0917 | 233 | 71   | N-Acetyl-L-Tyrosine            |
| 224.1293 | 223.084 | -0.0376 | 224.0917 | 302 | 96   | N-Acetyl-L-Tyrosine            |
| 224.1293 | 223.084 | -0.0376 | 224.0917 | 267 | 81   | N-Acetyl-L-Tyrosine            |
| 118.0873 | 117.079 | -0.001  | 118.0863 | 485 | 44.5 | Betaine                        |
| 118.0873 | 117.079 | -0.001  | 118.0863 | 259 | 81   | Betaine                        |
| 118.0873 | 117.079 | -0.001  | 118.0863 | 397 | 67.4 | Betaine                        |
| 186.0588 | 163.084 | 0.0149  | 186.0737 | 140 | 100  | N,N-Bis(2-Hydroxyethyl)Glycine |
| 186.0588 | 163.084 | 0.0149  | 186.0737 | 159 | 100  | N,N-Bis(2-Hydroxyethyl)Glycine |
| 97.0774  | 114.104 | 0.0238  | 97.1012  | 70  | 26.2 | Cyclohexanol, 1-Methyl-        |
| 224.1293 | 446.228 | -0.0081 | 224.1212 | 131 | 57.9 | Tyr-His-Lys                    |
| 224.1293 | 223.084 | -0.0376 | 224.0917 | 321 | 94.7 | N-Acetyl-L-Tyrosine            |
| 224.1293 | 223.084 | -0.0376 | 224.0917 | 221 | 77.8 | N-Acetyl-L-Tyrosine            |
| 118.0873 | 117.079 | -0.001  | 118.0863 | 329 | 55.9 | Betaine                        |
| 118.0873 | 117.079 | -0.001  | 118.0863 | 501 | 70.4 | Betaine                        |
| 118.0873 | 117.079 | -0.001  | 118.0863 | 275 | 75.2 | Betaine                        |
| 118.0873 | 117.079 | -0.001  | 118.0863 | 280 | 73.1 | Betaine                        |
| 186.0588 | 370.196 | 0.0467  | 186.1055 | 68  | 100  | Ser-His-Lys                    |
| 186.0588 | 163.084 | 0.0149  | 186.0737 | 155 | 100  | N,N-Bis(2-Hydroxyethyl)Glycine |
| 97.0774  | 114.104 | 0.0238  | 97.1012  | 46  | 23.7 | Cyclohexanol, 1-Methyl-        |
| 224.1293 | 223.1   | -0.022  | 224.107  | 133 | 100  | N-Fluorenylacetamide           |
| 224.1293 | 223.084 | -0.0376 | 224.0917 | 146 | 54.5 | N-Acetyl-L-Tyrosine            |
| 224.1293 | 223.084 | -0.0376 | 224.0917 | 213 | 91.4 | N-Acetyl-L-Tyrosine            |
| 224.1293 | 223.084 | -0.0376 | 224.0917 | 192 | 76.3 | N-Acetyl-L-Tyrosine            |
| 118.0873 | 117.079 | -0.001  | 118.0863 | 306 | 77   | Betaine                        |
| 118.0873 | 117.079 | -0.001  | 118.0863 | 445 | 63.7 | Betaine                        |
| 118.0873 | 117.079 | -0.001  | 118.0863 | 232 | 62.8 | Betaine                        |
| 118.0873 | 117.079 | -0.001  | 118.0863 | 237 | 69.5 | Betaine                        |
| 186.0588 | 203.091 | 0.0285  | 186.0873 | 68  | 100  | Ala-Asn                        |
| 186.0588 | 370.196 | 0.0467  | 186.1055 | 66  | 100  | Ser-His-Lys                    |
| 186.0588 | 163.084 | 0.0149  | 186.0737 | 133 | 100  | N,N-Bis(2-Hydroxyethyl)Glycine |
| 140.0692 | 139.063 | 0.0014  | 140.0706 | 59  | 52   | 5-Amino-2-Methoxyphenol        |
| 224.1293 | 446.228 | -0.0081 | 224.1212 | 102 | 68.9 | Tyr-His-Lys                    |
| 224.1293 | 223.1   | -0.022  | 224.107  | 133 | 100  | N-Fluorenylacetamide           |
| 224.1293 | 223.084 | -0.0376 | 224.0917 | 173 | 100  | N-Acetyl-L-Tyrosine            |
| 224.1293 | 223.084 | -0.0376 | 224.0917 | 346 | 94.3 | N-Acetyl-L-Tyrosine            |
| 118.0873 | 117.079 | -0.001  | 118.0863 | 485 | 43   | Betaine                        |
| 118.0873 | 117.079 | -0.001  | 118.0863 | 236 | 72.2 | Betaine                        |
| 118.0873 | 117.079 | -0.001  | 118.0863 | 267 | 42.2 | Betaine                        |



|          |         |         |          |     |      |                                               |
|----------|---------|---------|----------|-----|------|-----------------------------------------------|
| 186.0588 | 163.084 | 0.0149  | 186.0737 | 153 | 92.1 | N,N-Bis(2-Hydroxyethyl)Glycine                |
| 140.0692 | 139.027 | -0.035  | 140.0342 | 19  | 100  | 3-Pyridinecarboxylic Acid, 1,6-Dihydro-6-Oxo- |
| 140.0692 | 139.027 | -0.035  | 140.0342 | 80  | 100  | 3-Pyridinecarboxylic Acid, 1,6-Dihydro-6-Oxo- |
| 97.0774  | 114.104 | 0.0238  | 97.1012  | 134 | 45.3 | Cyclohexanol, 1-Methyl-                       |
| 195.1236 | 194.115 | -0.0009 | 195.1227 | 279 | 100  | Tetraethylene Glycol                          |
| 195.1236 | 194.115 | -0.0009 | 195.1227 | 281 | 100  | Tetraethylene Glycol                          |
| 118.0873 | 117.079 | -0.001  | 118.0863 | 262 | 83.6 | Betaine                                       |
| 118.0873 | 117.079 | -0.001  | 118.0863 | 491 | 65.7 | Betaine                                       |
| 118.0873 | 117.079 | -0.001  | 118.0863 | 227 | 69.4 | Betaine                                       |
| 118.0873 | 117.079 | -0.001  | 118.0863 | 310 | 63.7 | Betaine                                       |
| 186.0588 | 370.196 | 0.0467  | 186.1055 | 55  | 100  | Ser-His-Lys                                   |
| 186.0588 | 163.084 | 0.0149  | 186.0737 | 141 | 100  | N,N-Bis(2-Hydroxyethyl)Glycine                |
| 186.0588 | 163.084 | 0.0149  | 186.0737 | 157 | 100  | N,N-Bis(2-Hydroxyethyl)Glycine                |
| 140.0692 | 139.063 | 0.0014  | 140.0706 | 27  | 100  | 5-Amino-2-Methoxyphenol                       |
| 97.0774  | 114.104 | 0.0238  | 97.1012  | 44  | 25.9 | Cyclohexanemethanol                           |
| 224.1293 | 223.1   | -0.022  | 224.107  | 139 | 100  | N-Fluorenylacetamide                          |
| 224.1293 | 223.084 | -0.0376 | 224.0917 | 199 | 50.3 | N-Acetyl-L-Tyrosine                           |
| 224.1293 | 223.084 | -0.0376 | 224.0917 | 287 | 97.4 | N-Acetyl-L-Tyrosine                           |
| 224.1293 | 223.084 | -0.0376 | 224.0917 | 298 | 89.9 | N-Acetyl-L-Tyrosine                           |
| 118.0873 | 117.079 | -0.001  | 118.0863 | 414 | 90   | Betaine                                       |
| 118.0873 | 117.079 | -0.001  | 118.0863 | 459 | 41.6 | Betaine                                       |
| 118.0873 | 117.079 | -0.001  | 118.0863 | 331 | 98.8 | Betaine                                       |
| 118.0873 | 117.079 | -0.001  | 118.0863 | 221 | 73.2 | Betaine                                       |
| 186.0588 | 370.196 | 0.0467  | 186.1055 | 74  | 100  | Ser-His-Lys                                   |
| 186.0588 | 163.084 | 0.0149  | 186.0737 | 131 | 100  | N,N-Bis(2-Hydroxyethyl)Glycine                |
| 140.0692 | 139.1   | 0.038   | 140.107  | 38  | 100  | Tropinone                                     |
| 224.1293 | 223.084 | -0.0376 | 224.0917 | 178 | 100  | N-Acetyl-L-Tyrosine                           |
| 224.1293 | 223.084 | -0.0376 | 224.0917 | 161 | 45   | N-Acetyl-L-Tyrosine                           |
| 224.1293 | 223.084 | -0.0376 | 224.0917 | 362 | 96.5 | N-Acetyl-L-Tyrosine                           |
| 224.1293 | 223.084 | -0.0376 | 224.0917 | 308 | 90.6 | N-Acetyl-L-Tyrosine                           |
| 118.0873 | 117.079 | -0.001  | 118.0863 | 361 | 28.4 | Betaine                                       |
| 118.0873 | 117.079 | -0.001  | 118.0863 | 441 | 72.7 | Betaine                                       |
| 118.0873 | 117.079 | -0.001  | 118.0863 | 354 | 85.7 | Betaine                                       |
| 118.0873 | 117.079 | -0.001  | 118.0863 | 433 | 64.6 | Betaine                                       |
| 186.0588 | 163.084 | 0.0149  | 186.0737 | 137 | 100  | N,N-Bis(2-Hydroxyethyl)Glycine                |
| 97.0774  | 114.104 | 0.0238  | 97.1012  | 90  | 44.5 | Cyclohexanol, 1-Methyl-                       |
| 97.0774  | 114.104 | 0.0238  | 97.1012  | 39  | 22.1 | Cyclohexanemethanol                           |
| 97.0774  | 114.104 | 0.0238  | 97.1012  | 21  | 32.3 | Cyclohexanol, 1-Methyl-                       |
| 224.1293 | 223.084 | -0.0376 | 224.0917 | 230 | 46.1 | N-Acetyl-L-Tyrosine                           |
| 224.1293 | 223.084 | -0.0376 | 224.0917 | 274 | 89.5 | N-Acetyl-L-Tyrosine                           |

|          |         |         |          |     |      |                                |
|----------|---------|---------|----------|-----|------|--------------------------------|
| 224.1293 | 223.084 | -0.0376 | 224.0917 | 209 | 89.6 | N-Acetyl-L-Tyrosine            |
| 118.0873 | 117.079 | -0.001  | 118.0863 | 331 | 59.8 | Betaine                        |
| 118.0873 | 117.079 | -0.001  | 118.0863 | 532 | 67.2 | Betaine                        |
| 118.0873 | 117.079 | -0.001  | 118.0863 | 286 | 76.1 | Betaine                        |
| 118.0873 | 117.079 | -0.001  | 118.0863 | 234 | 65   | Betaine                        |
| 186.0588 | 203.091 | 0.0285  | 186.0873 | 75  | 76.9 | Ala-Asn                        |
| 186.0588 | 163.084 | 0.0149  | 186.0737 | 141 | 100  | N,N-Bis(2-Hydroxyethyl)Glycine |
| 186.0588 | 163.084 | 0.0149  | 186.0737 | 152 | 100  | N,N-Bis(2-Hydroxyethyl)Glycine |
| 224.1293 | 223.106 | -0.0164 | 224.1129 | 82  | 100  | N-Acetyl-D-Galactosaminitol    |
| 224.1293 | 223.084 | -0.0376 | 224.0917 | 174 | 54.2 | N-Acetyl-L-Tyrosine            |
| 224.1293 | 223.084 | -0.0376 | 224.0917 | 267 | 91.7 | N-Acetyl-L-Tyrosine            |
| 224.1293 | 223.084 | -0.0376 | 224.0917 | 173 | 68.1 | N-Acetyl-L-Tyrosine            |
| 118.0873 | 117.079 | -0.001  | 118.0863 | 220 | 100  | Betaine                        |
| 118.0873 | 117.079 | -0.001  | 118.0863 | 416 | 55.2 | Betaine                        |
| 118.0873 | 117.079 | -0.001  | 118.0863 | 256 | 69.3 | Betaine                        |
| 118.0873 | 117.079 | -0.001  | 118.0863 | 296 | 73.5 | Betaine                        |
| 140.0692 | 139.063 | 0.0014  | 140.0706 | 40  | 100  | 5-Amino-2-Methoxyphenol        |
| 186.0588 | 163.084 | 0.0149  | 186.0737 | 89  | 100  | N,N-Bis(2-Hydroxyethyl)Glycine |
| 186.0588 | 163.084 | 0.0149  | 186.0737 | 140 | 100  | N,N-Bis(2-Hydroxyethyl)Glycine |
| 97.0774  | 114.104 | 0.0238  | 97.1012  | 24  | 33.6 | Cyclohexanol, 1-Methyl-        |
| 195.1236 | 194.115 | -0.0009 | 195.1227 | 345 | 100  | Tetraethylene Glycol           |
| 195.1236 | 194.115 | -0.0009 | 195.1227 | 297 | 100  | Tetraethylene Glycol           |
| 195.1236 | 194.115 | -0.0009 | 195.1227 | 266 | 100  | Tetraethylene Glycol           |
| 195.1236 | 194.115 | -0.0009 | 195.1227 | 263 | 100  | Tetraethylene Glycol           |
| 118.0873 | 117.079 | -0.001  | 118.0863 | 237 | 97.7 | Betaine                        |
| 118.0873 | 117.079 | -0.001  | 118.0863 | 569 | 74.2 | Betaine                        |
| 118.0873 | 117.079 | -0.001  | 118.0863 | 306 | 76.3 | Betaine                        |
| 118.0873 | 117.079 | -0.001  | 118.0863 | 449 | 85.8 | Betaine                        |
| 186.0588 | 163.084 | 0.0149  | 186.0737 | 137 | 76.6 | N,N-Bis(2-Hydroxyethyl)Glycine |
| 97.0774  | 114.104 | 0.0238  | 97.1012  | 30  | 24.5 | Cyclohexanol, 1-Methyl-        |
| 118.0873 | 117.079 | -0.001  | 118.0863 | 278 | 60.5 | Betaine                        |
| 118.0873 | 117.079 | -0.001  | 118.0863 | 490 | 47   | Betaine                        |
| 118.0873 | 117.079 | -0.001  | 118.0863 | 424 | 98.2 | Betaine                        |
| 118.0873 | 117.079 | -0.001  | 118.0863 | 316 | 74.8 | Betaine                        |
| 186.0588 | 163.084 | 0.0149  | 186.0737 | 141 | 100  | N,N-Bis(2-Hydroxyethyl)Glycine |
| 97.0774  | 114.104 | 0.0238  | 97.1012  | 26  | 58.6 | Cyclohexanemethanol            |
| 97.0774  | 114.104 | 0.0238  | 97.1012  | 25  | 33.6 | Cyclohexanol, 1-Methyl-        |
| 224.1293 | 223.084 | -0.0376 | 224.0917 | 184 | 55.3 | N-Acetyl-L-Tyrosine            |
| 224.1293 | 223.084 | -0.0376 | 224.0917 | 300 | 92.1 | N-Acetyl-L-Tyrosine            |
| 224.1293 | 223.084 | -0.0376 | 224.0917 | 259 | 83.3 | N-Acetyl-L-Tyrosine            |
| 118.0873 | 117.079 | -0.001  | 118.0863 | 306 | 70.4 | Betaine                        |

|          |         |         |          |     |      |                                  |
|----------|---------|---------|----------|-----|------|----------------------------------|
| 118.0873 | 117.079 | -0.001  | 118.0863 | 542 | 75.2 | Betaine                          |
| 118.0873 | 117.079 | -0.001  | 118.0863 | 361 | 94.6 | Betaine                          |
| 118.0873 | 117.079 | -0.001  | 118.0863 | 399 | 63.6 | Betaine                          |
| 186.0588 | 163.084 | 0.0149  | 186.0737 | 153 | 100  | N,N-Bis(2-Hydroxyethyl)Glycine   |
| 224.1293 | 223.1   | -0.022  | 224.107  | 134 | 93.1 | N-Fluorenylacetamide             |
| 224.1293 | 223.084 | -0.0376 | 224.0917 | 152 | 45.7 | N-Acetyl-L-Tyrosine              |
| 224.1293 | 223.084 | -0.0376 | 224.0917 | 269 | 92.8 | N-Acetyl-L-Tyrosine              |
| 224.1293 | 223.084 | -0.0376 | 224.0917 | 275 | 87   | N-Acetyl-L-Tyrosine              |
| 118.0873 | 117.079 | -0.001  | 118.0863 | 369 | 63   | Betaine                          |
| 118.0873 | 117.079 | -0.001  | 118.0863 | 492 | 67.8 | Betaine                          |
| 118.0873 | 117.079 | -0.001  | 118.0863 | 405 | 95.2 | Betaine                          |
| 118.0873 | 117.079 | -0.001  | 118.0863 | 299 | 67.6 | Betaine                          |
| 186.0588 | 163.084 | 0.0149  | 186.0737 | 174 | 100  | N,N-Bis(2-Hydroxyethyl)Glycine   |
| 140.0692 | 139.063 | 0.0014  | 140.0706 | 78  | 59.3 | 3-Amino-2,3-Dihydrobenzoic Acid  |
| 97.0774  | 114.104 | 0.0238  | 97.1012  | 18  | 100  | Cyclohexanemethanol              |
| 195.1236 | 194.115 | -0.0009 | 195.1227 | 139 | 92.3 | Tetraethylene Glycol             |
| 195.1236 | 194.115 | -0.0009 | 195.1227 | 332 | 100  | Tetraethylene Glycol             |
| 195.1236 | 194.115 | -0.0009 | 195.1227 | 263 | 100  | Tetraethylene Glycol             |
| 118.0873 | 117.079 | -0.001  | 118.0863 | 325 | 69.7 | Betaine                          |
| 118.0873 | 117.079 | -0.001  | 118.0863 | 459 | 57.5 | Betaine                          |
| 118.0873 | 117.079 | -0.001  | 118.0863 | 322 | 61.6 | Betaine                          |
| 118.0873 | 117.079 | -0.001  | 118.0863 | 313 | 64.9 | Betaine                          |
| 140.0692 | 139.1   | 0.038   | 140.107  | 131 | 100  | Tropinone                        |
| 186.0588 | 370.196 | 0.0467  | 186.1055 | 87  | 100  | Ser-His-Lys                      |
| 97.0774  | 114.104 | 0.0238  | 97.1012  | 47  | 20.6 | Cyclohexanol, 4-Methyl-, Trans-  |
| 97.0774  | 114.104 | 0.0238  | 97.1012  | 22  | 32   | Cyclohexanol, 1-Methyl-          |
| 224.1293 | 446.228 | -0.0081 | 224.1212 | 162 | 50.8 | Tyr-His-Lys                      |
| 224.1293 | 223.084 | -0.0376 | 224.0917 | 259 | 88.8 | N-Acetyl-L-Tyrosine              |
| 224.1293 | 223.084 | -0.0376 | 224.0917 | 268 | 80.1 | N-Acetyl-L-Tyrosine              |
| 118.0873 | 117.079 | -0.001  | 118.0863 | 254 | 89.1 | Betaine                          |
| 118.0873 | 117.079 | -0.001  | 118.0863 | 465 | 98.4 | Betaine                          |
| 118.0873 | 117.079 | -0.001  | 118.0863 | 215 | 72.5 | Betaine                          |
| 118.0873 | 117.079 | -0.001  | 118.0863 | 374 | 66.6 | Betaine                          |
| 186.0588 | 163.084 | 0.0149  | 186.0737 | 159 | 100  | N,N-Bis(2-Hydroxyethyl)Glycine   |
| 140.0692 | 139.063 | 0.0014  | 140.0706 | 94  | 55.3 | 3-Amino-2,3-Dihydrobenzoic Acid  |
| 224.1293 | 241.117 | -0.0151 | 224.1142 | 25  | 100  | (6R)-5,6,7,8-Tetrahydrobiopterin |
| 224.1293 | 223.1   | -0.022  | 224.107  | 101 | 41.3 | N-Fluorenylacetamide             |
| 224.1293 | 223.084 | -0.0376 | 224.0917 | 336 | 97.5 | N-Acetyl-L-Tyrosine              |
| 224.1293 | 223.084 | -0.0376 | 224.0917 | 301 | 91.2 | N-Acetyl-L-Tyrosine              |
| 118.0873 | 117.079 | -0.001  | 118.0863 | 469 | 97.8 | Betaine                          |
| 118.0873 | 117.079 | -0.001  | 118.0863 | 355 | 98.6 | Betaine                          |

|          |         |         |          |     |      |                                 |
|----------|---------|---------|----------|-----|------|---------------------------------|
| 118.0873 | 117.079 | -0.001  | 118.0863 | 333 | 75.7 | Betaine                         |
| 186.0588 | 163.084 | 0.0149  | 186.0737 | 110 | 100  | N,N-Bis(2-Hydroxyethyl)Glycine  |
| 186.0588 | 163.084 | 0.0149  | 186.0737 | 102 | 100  | N,N-Bis(2-Hydroxyethyl)Glycine  |
| 97.0774  | 114.104 | 0.0238  | 97.1012  | 38  | 23.9 | Cyclohexanol, 1-Methyl-         |
| 97.0774  | 114.104 | 0.0238  | 97.1012  | 44  | 19.2 | Cyclohexanol, 4-Methyl-, Trans- |
| 224.1293 | 223.106 | -0.0164 | 224.1129 | 121 | 100  | N-Acetyl-D-Galactosaminitol     |
| 224.1293 | 223.084 | -0.0376 | 224.0917 | 151 | 49.2 | N-Acetyl-L-Tyrosine             |
| 224.1293 | 223.084 | -0.0376 | 224.0917 | 261 | 93   | N-Acetyl-L-Tyrosine             |
| 224.1293 | 223.084 | -0.0376 | 224.0917 | 230 | 90.7 | N-Acetyl-L-Tyrosine             |
| 118.0873 | 117.079 | -0.001  | 118.0863 | 278 | 100  | Betaine                         |
| 118.0873 | 117.079 | -0.001  | 118.0863 | 479 | 67.2 | Betaine                         |
| 118.0873 | 117.079 | -0.001  | 118.0863 | 364 | 77   | Betaine                         |
| 118.0873 | 117.079 | -0.001  | 118.0863 | 178 | 61.7 | Betaine                         |
| 186.0588 | 163.084 | 0.0149  | 186.0737 | 86  | 54.5 | N,N-Bis(2-Hydroxyethyl)Glycine  |
| 186.0588 | 163.084 | 0.0149  | 186.0737 | 158 | 100  | N,N-Bis(2-Hydroxyethyl)Glycine  |
| 224.1293 | 446.228 | -0.0081 | 224.1212 | 123 | 67.9 | Tyr-His-Lys                     |
| 224.1293 | 223.084 | -0.0376 | 224.0917 | 307 | 97.2 | N-Acetyl-L-Tyrosine             |
| 224.1293 | 223.084 | -0.0376 | 224.0917 | 214 | 61.1 | N-Acetyl-L-Tyrosine             |
| 118.0873 | 117.079 | -0.001  | 118.0863 | 227 | 81.1 | Betaine                         |
| 118.0873 | 117.079 | -0.001  | 118.0863 | 475 | 66.8 | Betaine                         |
| 118.0873 | 117.079 | -0.001  | 118.0863 | 320 | 83.8 | Betaine                         |
| 118.0873 | 117.079 | -0.001  | 118.0863 | 231 | 39   | Betaine                         |
| 186.0588 | 370.196 | 0.0467  | 186.1055 | 41  | 100  | Ser-His-Lys                     |
| 140.0692 | 139.063 | 0.0014  | 140.0706 | 41  | 100  | 5-Amino-2-Methoxyphenol         |
| 140.0692 | 139.063 | 0.0014  | 140.0706 | 89  | 56.6 | 3-Amino-2,3-Dihydrobenzoic Acid |
| 97.0774  | 114.104 | 0.0238  | 97.1012  | 40  | 23.5 | Cyclohexanol, 1-Methyl-         |
| 224.1293 | 223.084 | -0.0376 | 224.0917 | 185 | 70.9 | N-Acetyl-L-Tyrosine             |
| 224.1293 | 446.228 | -0.0081 | 224.1212 | 95  | 76.9 | Tyr-His-Lys                     |
| 224.1293 | 223.084 | -0.0376 | 224.0917 | 276 | 97.1 | N-Acetyl-L-Tyrosine             |
| 224.1293 | 223.084 | -0.0376 | 224.0917 | 304 | 90.8 | N-Acetyl-L-Tyrosine             |
| 118.0873 | 117.079 | -0.001  | 118.0863 | 390 | 70.2 | Betaine                         |
| 118.0873 | 117.079 | -0.001  | 118.0863 | 527 | 70.7 | Betaine                         |
| 118.0873 | 117.079 | -0.001  | 118.0863 | 305 | 85.4 | Betaine                         |
| 118.0873 | 117.079 | -0.001  | 118.0863 | 265 | 54   | Betaine                         |

**Table A7.** List of non-volatile metabolites (LC/MS) for managed population animals. Samples collected in Dec 2011 from multiple animals were pooled. Experiment was conducted using specialized lipids fraction protocol on RP column (refer to Materials and Methods section) in positive ion mode. Top three matches are given for each compound.

| Parent m/z | Mass    | Delta (m/z) | Library Precursor m/z | Match Score | Probability (%) | Chem ID                     |
|------------|---------|-------------|-----------------------|-------------|-----------------|-----------------------------|
| 118.0873   | 117.079 | -0.001      | 118.0863              | 220         | 67.5            | Betaine                     |
| 118.0873   | 117.079 | -0.001      | 118.0863              | 213         | 67.5            | Betaine                     |
| 118.0873   | 117.079 | -0.001      | 118.0863              | 212         | 67.5            | Betaine                     |
| 118.0873   | 117.079 | -0.001      | 118.0863              | 452         | 58.8            | Betaine                     |
| 118.0873   | 117.079 | -0.001      | 118.0863              | 450         | 58.8            | Betaine                     |
| 118.0873   | 117.079 | -0.001      | 118.0863              | 446         | 58.8            | Betaine                     |
| 118.0873   | 117.079 | -0.001      | 118.0863              | 340         | 82.5            | Betaine                     |
| 118.0873   | 117.079 | -0.001      | 118.0863              | 334         | 82.5            | Betaine                     |
| 118.0873   | 117.079 | -0.001      | 118.0863              | 321         | 82.5            | Betaine                     |
| 118.0873   | 117.079 | -0.001      | 118.0863              | 352         | 65.8            | Betaine                     |
| 118.0873   | 117.079 | -0.001      | 118.0863              | 351         | 65.8            | Betaine                     |
| 118.0873   | 117.079 | -0.001      | 118.0863              | 350         | 65.8            | Betaine                     |
| 224.1293   | 223.106 | -0.0164     | 224.1129              | 65          | 56.6            | N-Acetyl-D-galactosaminitol |
| 224.1293   | 223.106 | -0.0164     | 224.1129              | 64          | 56.6            | N-Acetyl-D-galactosaminitol |
| 224.1293   | 223.106 | -0.0164     | 224.1129              | 62          | 56.6            | N-Acetyl-D-galactosaminitol |
| 224.1293   | 223.084 | -0.0376     | 224.0917              | 159         | 47              | N-Acetyl-L-tyrosine         |
| 224.1293   | 446.228 | -0.0081     | 224.1212              | 152         | 36              | Tyr-His-Lys                 |
| 224.1293   | 223.084 | -0.0376     | 224.0917              | 142         | 47              | N-Acetyl-L-tyrosine         |
| 224.1293   | 223.084 | -0.0376     | 224.0917              | 202         | 89.1            | N-Acetyl-L-tyrosine         |
| 224.1293   | 446.228 | -0.0081     | 224.1212              | 125         | 10.9            | Tyr-His-Lys                 |
| 224.1293   | 223.084 | -0.0376     | 224.0917              | 218         | 79.4            | N-Acetyl-L-tyrosine         |
| 224.1293   | 223.084 | -0.0376     | 224.0917              | 197         | 79.4            | N-Acetyl-L-tyrosine         |
| 224.1293   | 446.228 | -0.0081     | 224.1212              | 172         | 16.8            | Tyr-His-Lys                 |
| 118.0873   | 117.079 | -0.001      | 118.0863              | 382         | 100             | Betaine                     |
| 118.0873   | 117.079 | -0.001      | 118.0863              | 376         | 100             | Betaine                     |
| 118.0873   | 117.079 | -0.001      | 118.0863              | 371         | 100             | Betaine                     |
| 118.0873   | 117.079 | -0.001      | 118.0863              | 460         | 45.1            | Betaine                     |
| 118.0873   | 117.079 | -0.001      | 118.0863              | 455         | 45.1            | Betaine                     |
| 118.0873   | 117.079 | -0.001      | 118.0863              | 451         | 45.1            | Betaine                     |
| 118.0873   | 117.079 | -0.001      | 118.0863              | 322         | 81.8            | Betaine                     |
| 118.0873   | 117.079 | -0.001      | 118.0863              | 321         | 81.8            | Betaine                     |
| 118.0873   | 117.079 | -0.001      | 118.0863              | 311         | 81.8            | Betaine                     |
| 118.0873   | 117.079 | -0.001      | 118.0863              | 207         | 66.5            | Betaine                     |
| 118.0873   | 117.079 | -0.001      | 118.0863              | 206         | 66.5            | Betaine                     |
| 118.0873   | 117.079 | -0.001      | 118.0863              | 202         | 66.5            | Betaine                     |
| 186.0588   | 370.196 | 0.0467      | 186.1055              | 52          | 100             | Ser-His-Lys                 |
| 224.1293   | 223.084 | -0.0376     | 224.0917              | 307         | 90.4            | N-Acetyl-L-tyrosine         |
| 224.1293   | 223.084 | -0.0376     | 224.0917              | 290         | 90.4            | N-Acetyl-L-tyrosine         |

|          |         |         |          |     |      |                                   |
|----------|---------|---------|----------|-----|------|-----------------------------------|
| 224.1293 | 223.084 | -0.0376 | 224.0917 | 255 | 90.4 | N-Acetyl-L-tyrosine               |
| 224.1293 | 223.084 | -0.0376 | 224.0917 | 205 | 76.2 | N-Acetyl-L-tyrosine               |
| 224.1293 | 223.084 | -0.0376 | 224.0917 | 190 | 76.2 | N-Acetyl-L-tyrosine               |
| 224.1293 | 223.084 | -0.0376 | 224.0917 | 173 | 76.2 | N-Acetyl-L-tyrosine               |
| 118.0873 | 117.079 | -0.001  | 118.0863 | 318 | 32.2 | Betaine                           |
| 118.0873 | 117.079 | -0.001  | 118.0863 | 318 | 32.2 | Betaine                           |
| 118.0873 | 117.079 | -0.001  | 118.0863 | 316 | 32.2 | Betaine                           |
| 118.0873 | 117.079 | -0.001  | 118.0863 | 472 | 64.4 | Betaine                           |
| 118.0873 | 117.079 | -0.001  | 118.0863 | 468 | 64.4 | Betaine                           |
| 118.0873 | 117.079 | -0.001  | 118.0863 | 467 | 64.4 | Betaine                           |
| 118.0873 | 117.079 | -0.001  | 118.0863 | 275 | 67.5 | Betaine                           |
| 118.0873 | 117.079 | -0.001  | 118.0863 | 275 | 67.5 | Betaine                           |
| 118.0873 | 117.079 | -0.001  | 118.0863 | 271 | 67.5 | Betaine                           |
| 118.0873 | 117.079 | -0.001  | 118.0863 | 368 | 68.7 | Betaine                           |
| 118.0873 | 117.079 | -0.001  | 118.0863 | 364 | 68.7 | Betaine                           |
| 118.0873 | 117.079 | -0.001  | 118.0863 | 361 | 68.7 | Betaine                           |
| 186.0588 | 163.084 | 0.0149  | 186.0737 | 117 | 80.1 | N,N-Bis(2-hydroxyethyl)glycine    |
| 186.0588 | 163.084 | 0.0149  | 186.0737 | 91  | 80.1 | N,N-Bis(2-hydroxyethyl)glycine    |
| 186.0588 | 203.091 | 0.0285  | 186.0873 | 64  | 15.8 | Ala-Asn                           |
| 224.1293 | 223.106 | -0.0164 | 224.1129 | 42  | 58.6 | N-Acetyl-D-galactosaminitol       |
| 224.1293 | 241.117 | -0.0151 | 224.1142 | 32  | 41.4 | ((6R)-5,6,7,8-Tetrahydrobiopterin |
| 224.1293 | 446.228 | -0.0081 | 224.1212 | 120 | 49.7 | Tyr-His-Lys                       |
| 224.1293 | 223.084 | -0.0376 | 224.0917 | 116 | 42   | N-Acetyl-L-tyrosine               |
| 224.1293 | 223.106 | -0.0164 | 224.1129 | 62  | 8.2  | N-Acetyl-D-galactosaminitol       |
| 224.1293 | 223.084 | -0.0376 | 224.0917 | 249 | 55.6 | N-Acetyl-L-tyrosine               |
| 224.1293 | 223.084 | -0.0376 | 224.0917 | 246 | 55.6 | N-Acetyl-L-tyrosine               |
| 224.1293 | 223.084 | -0.0376 | 224.0917 | 239 | 55.6 | N-Acetyl-L-tyrosine               |
| 224.1293 | 223.084 | -0.0376 | 224.0917 | 205 | 77.6 | N-Acetyl-L-tyrosine               |
| 224.1293 | 223.084 | -0.0376 | 224.0917 | 190 | 77.6 | N-Acetyl-L-tyrosine               |
| 224.1293 | 446.228 | -0.0081 | 224.1212 | 177 | 22.4 | Tyr-His-Lys                       |
| 224.1293 | 223.106 | -0.0164 | 224.1129 | 93  | 100  | N-Acetyl-D-galactosaminitol       |
| 224.1293 | 223.106 | -0.0164 | 224.1129 | 92  | 100  | N-Acetyl-D-galactosaminitol       |
| 224.1293 | 223.106 | -0.0164 | 224.1129 | 89  | 100  | N-Acetyl-D-galactosaminitol       |
| 224.1293 | 223.106 | -0.0164 | 224.1129 | 86  | 100  | N-Acetyl-D-galactosaminitol       |
| 243.1858 | 220.183 | -0.0139 | 243.1719 | 64  | 100  | Butylated hydroxytoluene          |
| 243.1858 | 220.183 | -0.0139 | 243.1719 | 48  | 100  | Butylated hydroxytoluene          |
| 118.0959 | 117.079 | -0.0096 | 118.0863 | 295 | 100  | Betaine                           |
| 118.0959 | 117.079 | -0.0096 | 118.0863 | 293 | 100  | Betaine                           |
| 118.0959 | 117.079 | -0.0096 | 118.0863 | 288 | 100  | Betaine                           |
| 118.0959 | 117.079 | -0.0096 | 118.0863 | 268 | 96.4 | Betaine                           |
| 118.0959 | 117.079 | -0.0096 | 118.0863 | 263 | 96.4 | Betaine                           |
| 118.0959 | 117.079 | -0.0096 | 118.0863 | 221 | 96.4 | Betaine                           |
| 118.0959 | 117.079 | -0.0096 | 118.0863 | 332 | 31.6 | Betaine                           |
| 118.0959 | 117.079 | -0.0096 | 118.0863 | 330 | 31.6 | Betaine                           |
| 118.0959 | 117.079 | -0.0096 | 118.0863 | 328 | 31.6 | Betaine                           |
| 139.0603 | 138.032 | -0.021  | 139.039  | 120 | 37.2 | Salicylic acid                    |
| 139.0603 | 138.068 | 0.0151  | 139.0754 | 116 | 31.4 | Benzeneethanol, 2-hydroxy-        |

|          |         |         |          |     |      |                                   |
|----------|---------|---------|----------|-----|------|-----------------------------------|
| 139.0603 | 138.068 | 0.0151  | 139.0754 | 115 | 31.4 | Benzeneethanol, 2-hydroxy-        |
| 139.0603 | 138.043 | -0.0101 | 139.0502 | 163 | 28.4 | 4-Imidazoleacrylic acid           |
| 139.0603 | 138.043 | -0.0101 | 139.0502 | 161 | 28.4 | 4-Imidazoleacrylic acid           |
| 139.0603 | 138     | -0.01   | 139.05   | 161 | 26.2 | urocanic acid                     |
| 139.0603 | 138.043 | -0.0101 | 139.0502 | 163 | 72.5 | 4-Imidazoleacrylic acid           |
| 139.0603 | 138.043 | -0.0101 | 139.0502 | 162 | 72.5 | 4-Imidazoleacrylic acid           |
| 139.0603 | 138.043 | -0.0101 | 139.0502 | 159 | 72.5 | 4-Imidazoleacrylic acid           |
| 273.1777 | 290.225 | 0.0436  | 273.2213 | 67  | 73.2 | 5-Androsten-3.beta.,17.beta.-diol |
| 273.1777 | 290.225 | 0.0436  | 273.2213 | 65  | 73.2 | 5-Androsten-3.beta.,17.beta.-diol |
| 273.1777 | 290.225 | 0.0436  | 273.2213 | 65  | 73.2 | 5-Androsten-3.beta.,17.beta.-diol |
| 273.1777 | 290.225 | 0.0436  | 273.2213 | 102 | 42   | 5-Androsten-3.beta.,17.beta.-diol |
| 273.1777 | 290.225 | 0.0436  | 273.2213 | 101 | 42   | 5-Androsten-3.beta.,17.beta.-diol |
| 273.1777 | 290.225 | 0.0436  | 273.2213 | 89  | 42   | 5-Androsten-3.beta.,17.beta.-diol |
| 195.1333 | 194.115 | -0.0106 | 195.1227 | 209 | 100  | Tetraethylene glycol              |
| 195.1333 | 194.115 | -0.0106 | 195.1227 | 205 | 100  | Tetraethylene glycol              |
| 195.1333 | 194.115 | -0.0106 | 195.1227 | 176 | 100  | Tetraethylene glycol              |
| 432.2891 | 449.314 | 0.0217  | 432.3108 | 66  | 100  | Glycodeoxycholic acid             |
| 387.1819 | 386     | -0.05   | 387.13   | 258 | 28.5 | 1-O-b-D-glucopyranosyl sinapate   |
| 387.1819 | 386     | -0.05   | 387.13   | 250 | 21.3 | 1-O-b-D-glucopyranosyl sinapate   |
| 387.1819 | 386     | -0.05   | 387.13   | 244 | 16.7 | 1-O-b-D-glucopyranosyl sinapate   |
| 387.1819 | 193.074 | -0.0268 | 387.1551 | 252 | 31.3 | Hippuric acid, methyl ester       |
| 387.1819 | 193.074 | -0.0268 | 387.1551 | 251 | 31.3 | Hippuric acid, methyl ester       |
| 387.1819 | 193.074 | -0.0268 | 387.1551 | 243 | 31.3 | Hippuric acid, methyl ester       |
| 387.1819 | 193.074 | -0.0268 | 387.1551 | 301 | 54.5 | Hippuric acid, methyl ester       |
| 387.1819 | 193.074 | -0.0268 | 387.1551 | 301 | 54.5 | Hippuric acid, methyl ester       |
| 387.1819 | 193.074 | -0.0268 | 387.1551 | 293 | 54.5 | Hippuric acid, methyl ester       |
| 387.1819 | 193.074 | -0.0268 | 387.1551 | 237 | 28.3 | Hippuric acid, methyl ester       |
| 387.1819 | 193.074 | -0.0268 | 387.1551 | 236 | 28.3 | Hippuric acid, methyl ester       |
| 387.1819 | 193.074 | -0.0268 | 387.1551 | 232 | 28.3 | Hippuric acid, methyl ester       |
| 404.2081 | 403.207 | 0.006   | 404.214  | 79  | 12.7 | Gln-Glu-Lys                       |
| 404.2081 | 403.207 | 0.006   | 404.214  | 77  | 11.7 | Gln-Glu-Lys                       |
| 404.2081 | 403.207 | 0.006   | 404.214  | 75  | 10.8 | Gln-Glu-Lys                       |
| 404.2081 | 403.222 | 0.0211  | 404.2292 | 16  | 11.4 | Trp-Ala-Lys                       |
| 404.2081 | 403.222 | 0.0211  | 404.2292 | 15  | 11   | Trp-Ala-Lys                       |
| 404.2081 | 403.254 | 0.0535  | 404.2616 | 13  | 10.2 | Arg-Thr-Lys                       |
| 404.2081 | 403.207 | 0.006   | 404.214  | 49  | 42.5 | Gln-Glu-Lys                       |
| 404.2081 | 403.218 | 0.0171  | 404.2252 | 32  | 23.2 | Thr-Gln-Arg                       |
| 404.2081 | 403.207 | 0.006   | 404.214  | 10  | 9.2  | Gln-Glu-Lys                       |
| 404.2081 | 403.207 | 0.006   | 404.214  | 64  | 17.2 | Gln-Glu-Lys                       |
| 404.2081 | 403.207 | 0.006   | 404.214  | 55  | 12.5 | Glu-Gln-Lys                       |
| 404.2081 | 403.218 | 0.0171  | 404.2252 | 52  | 11.1 | Thr-Gln-Arg                       |
| 409.1633 | 386.17  | -0.0038 | 409.1595 | 113 | 81.2 | Aminophenyl)ethyladenosine        |
| 409.1633 | 408.186 | 0.0305  | 409.1938 | 73  | 18.8 | Met-Met-Lys                       |
| 409.1633 | 386.17  | -0.0038 | 409.1595 | 42  | 81.2 | Aminophenyl)ethyladenosine        |
| 343.291  | 408.288 | -0.0267 | 343.2643 | 88  | 100  | Cholic acid                       |
| 343.291  | 408.288 | -0.0267 | 343.2643 | 63  | 100  | Cholic acid                       |
| 343.291  | 408.288 | -0.0267 | 343.2643 | 47  | 100  | Cholic acid                       |

|          |         |         |          |     |      |                             |
|----------|---------|---------|----------|-----|------|-----------------------------|
| 387.176  | 193.074 | -0.0209 | 387.1551 | 237 | 100  | Hippuric acid, methyl ester |
| 387.176  | 193.074 | -0.0209 | 387.1551 | 237 | 100  | Hippuric acid, methyl ester |
| 387.176  | 193.074 | -0.0209 | 387.1551 | 236 | 100  | Hippuric acid, methyl ester |
| 387.176  | 193.074 | -0.0209 | 387.1551 | 264 | 69   | Hippuric acid, methyl ester |
| 387.176  | 193.074 | -0.0209 | 387.1551 | 260 | 69   | Hippuric acid, methyl ester |
| 387.176  | 193.074 | -0.0209 | 387.1551 | 260 | 69   | Hippuric acid, methyl ester |
| 387.176  | 193.074 | -0.0209 | 387.1551 | 266 | 100  | Hippuric acid, methyl ester |
| 387.176  | 193.074 | -0.0209 | 387.1551 | 264 | 100  | Hippuric acid, methyl ester |
| 387.176  | 193.074 | -0.0209 | 387.1551 | 264 | 100  | Hippuric acid, methyl ester |
| 387.176  | 193.074 | -0.0209 | 387.1551 | 308 | 49.2 | Hippuric acid, methyl ester |
| 387.176  | 193.074 | -0.0209 | 387.1551 | 306 | 49.2 | Hippuric acid, methyl ester |
| 387.176  | 193.074 | -0.0209 | 387.1551 | 304 | 49.2 | Hippuric acid, methyl ester |
| 118.0821 | 117.079 | 0.0042  | 118.0863 | 392 | 68.2 | Betaine                     |
| 118.0821 | 117.079 | 0.0042  | 118.0863 | 389 | 68.2 | Betaine                     |
| 118.0821 | 117.079 | 0.0042  | 118.0863 | 389 | 68.2 | Betaine                     |
| 118.0821 | 117.079 | 0.0042  | 118.0863 | 547 | 97.5 | Betaine                     |
| 118.0821 | 117.079 | 0.0042  | 118.0863 | 542 | 97.5 | Betaine                     |
| 118.0821 | 117.079 | 0.0042  | 118.0863 | 531 | 97.5 | Betaine                     |
| 118.0821 | 117.079 | 0.0042  | 118.0863 | 345 | 76.5 | Betaine                     |
| 118.0821 | 117.079 | 0.0042  | 118.0863 | 335 | 76.5 | Betaine                     |
| 118.0821 | 117.079 | 0.0042  | 118.0863 | 319 | 76.5 | Betaine                     |
| 118.0821 | 117.079 | 0.0042  | 118.0863 | 376 | 35.4 | Betaine                     |
| 118.0821 | 117.079 | 0.0042  | 118.0863 | 373 | 35.4 | Betaine                     |
| 118.0821 | 117     | 0.01    | 118.09   | 368 | 26.4 | Betaine                     |
| 118.0873 | 117.079 | -0.001  | 118.0863 | 344 | 100  | Betaine                     |
| 118.0873 | 117.079 | -0.001  | 118.0863 | 337 | 100  | Betaine                     |
| 118.0873 | 117.079 | -0.001  | 118.0863 | 333 | 100  | Betaine                     |
| 118.0873 | 117.079 | -0.001  | 118.0863 | 365 | 31.3 | Betaine                     |
| 118.0873 | 117.079 | -0.001  | 118.0863 | 364 | 31.3 | Betaine                     |
| 118.0873 | 117.079 | -0.001  | 118.0863 | 361 | 31.3 | Betaine                     |
| 118.0873 | 117.079 | -0.001  | 118.0863 | 294 | 66.7 | Betaine                     |
| 118.0873 | 117.079 | -0.001  | 118.0863 | 291 | 66.7 | Betaine                     |
| 118.0873 | 117.079 | -0.001  | 118.0863 | 288 | 66.7 | Betaine                     |
| 118.0873 | 117     | 0       | 118.09   | 317 | 27.8 | Betaine                     |
| 118.0873 | 117.079 | -0.001  | 118.0863 | 315 | 25.7 | Betaine                     |
| 118.0873 | 117.079 | -0.001  | 118.0863 | 312 | 25.7 | Betaine                     |
| 118.0873 | 117.079 | -0.001  | 118.0863 | 424 | 62.4 | Betaine                     |
| 118.0873 | 117.079 | -0.001  | 118.0863 | 420 | 62.4 | Betaine                     |
| 118.0873 | 117.079 | -0.001  | 118.0863 | 415 | 62.4 | Betaine                     |
| 118.0873 | 117.079 | -0.001  | 118.0863 | 295 | 68.2 | Betaine                     |
| 118.0873 | 117.079 | -0.001  | 118.0863 | 295 | 68.2 | Betaine                     |
| 118.0873 | 117.079 | -0.001  | 118.0863 | 291 | 68.2 | Betaine                     |
| 118.0873 | 117.079 | -0.001  | 118.0863 | 321 | 70.2 | Betaine                     |
| 118.0873 | 117.079 | -0.001  | 118.0863 | 320 | 70.2 | Betaine                     |
| 118.0873 | 117.079 | -0.001  | 118.0863 | 316 | 70.2 | Betaine                     |
| 288.2597 | 270.219 | -0.0064 | 288.2533 | 61  | 100  | Surfynol PSA-336            |
| 288.2547 | 287.196 | -0.052  | 288.203  | 89  | 20.4 | Leu-Arg                     |



|          |         |         |          |     |      |                                        |
|----------|---------|---------|----------|-----|------|----------------------------------------|
| 288.2547 | 287.196 | -0.052  | 288.203  | 89  | 20.4 | Arg-Leu                                |
| 288.2547 | 287.196 | -0.052  | 288.203  | 83  | 16   | Leu-Arg                                |
| 288.2547 | 287.196 | -0.052  | 288.203  | 271 | 67.2 | Leu-Arg                                |
| 288.2547 | 287.196 | -0.052  | 288.203  | 232 | 15.9 | Arg-Leu                                |
| 288.2547 | 287.196 | -0.052  | 288.203  | 225 | 12.1 | Arg-Ile                                |
| 288.2547 | 287.196 | -0.052  | 288.203  | 116 | 32.9 | Leu-Arg                                |
| 288.2547 | 287.196 | -0.052  | 288.203  | 110 | 25.8 | Arg-Leu                                |
| 288.2547 | 287.196 | -0.052  | 288.203  | 99  | 17.7 | Arg-Ile                                |
| 118.0873 | 117.079 | -0.001  | 118.0863 | 449 | 66.5 | Betaine                                |
| 118.0873 | 117.079 | -0.001  | 118.0863 | 444 | 66.5 | Betaine                                |
| 118.0873 | 117.079 | -0.001  | 118.0863 | 438 | 66.5 | Betaine                                |
| 118.0873 | 117.079 | -0.001  | 118.0863 | 309 | 68.9 | Betaine                                |
| 118.0873 | 117.079 | -0.001  | 118.0863 | 308 | 68.9 | Betaine                                |
| 118.0873 | 117.079 | -0.001  | 118.0863 | 304 | 68.9 | Betaine                                |
| 118.0873 | 117.079 | -0.001  | 118.0863 | 299 | 73.6 | Betaine                                |
| 118.0873 | 117.079 | -0.001  | 118.0863 | 297 | 73.6 | Betaine                                |
| 118.0873 | 117.079 | -0.001  | 118.0863 | 291 | 73.6 | Betaine                                |
| 244.2278 | 226.193 | -0.0007 | 244.2271 | 146 | 100  | 2,4,7,9-Tetramethyl-5-decyne-4,7-diol  |
| 244.2278 | 226.193 | -0.0007 | 244.2271 | 135 | 100  | 2,4,7,9-Tetramethyl-5-decyne-4,7-diol  |
| 304.3018 | 304.3   | -0.0019 | 304.2999 | 183 | 12.9 | Benzyl dodecyl dimethylammonium cation |
| 304.3018 | 304.3   | -0.0019 | 304.2999 | 183 | 12.9 | Benzyl dodecyl dimethylammonium cation |
| 304.3018 | 304.3   | -0.0019 | 304.2999 | 177 | 10.2 | Benzyl dodecyl dimethylammonium cation |
| 304.3018 | 304.3   | -0.0019 | 304.2999 | 301 | 46   | Benzyl dodecyl dimethylammonium cation |
| 304.3018 | 304.3   | -0.0019 | 304.2999 | 227 | 6.1  | Benzyl dodecyl dimethylammonium cation |
| 304.3018 | 304.3   | -0.0019 | 304.2999 | 225 | 5.6  | Benzyl dodecyl dimethylammonium cation |
| 304.3018 | 304.3   | -0.0019 | 304.2999 | 170 | 15.6 | Benzyl dodecyl dimethylammonium cation |
| 304.3018 | 304.3   | -0.0019 | 304.2999 | 168 | 14.3 | Benzyl dodecyl dimethylammonium cation |
| 304.3018 | 304.3   | -0.0019 | 304.2999 | 165 | 12.7 | Benzyl dodecyl dimethylammonium cation |
| 304.3018 | 304.3   | -0.0019 | 304.2999 | 182 | 10.4 | Benzyl dodecyl dimethylammonium cation |
| 304.3018 | 304.3   | -0.0019 | 304.2999 | 180 | 9.6  | Benzyl dodecyl dimethylammonium cation |
| 304.3018 | 304.3   | -0.0019 | 304.2999 | 176 | 8.1  | Benzyl dodecyl dimethylammonium cation |
| 118.0873 | 117.079 | -0.001  | 118.0863 | 378 | 34.6 | Betaine                                |
| 118.0873 | 117.079 | -0.001  | 118.0863 | 376 | 34.6 | Betaine                                |

|          |         |         |          |     |      |                    |
|----------|---------|---------|----------|-----|------|--------------------|
| 118.0873 | 117.079 | -0.001  | 118.0863 | 372 | 34.6 | Betaine            |
| 118.0873 | 117.079 | -0.001  | 118.0863 | 333 | 81.7 | Betaine            |
| 118.0873 | 117.079 | -0.001  | 118.0863 | 332 | 81.7 | Betaine            |
| 118.0873 | 117.079 | -0.001  | 118.0863 | 323 | 81.7 | Betaine            |
| 118.0873 | 117.079 | -0.001  | 118.0863 | 376 | 62.6 | Betaine            |
| 118.0873 | 117.079 | -0.001  | 118.0863 | 373 | 62.6 | Betaine            |
| 118.0873 | 117.079 | -0.001  | 118.0863 | 372 | 62.6 | Betaine            |
| 186.0588 | 370.196 | 0.0467  | 186.1055 | 65  | 100  | Ser-His-Lys        |
| 186.0588 | 370.196 | 0.0467  | 186.1055 | 62  | 100  | Ser-His-Lys        |
| 118.0873 | 117.079 | -0.001  | 118.0863 | 302 | 68.4 | Betaine            |
| 118.0873 | 117.079 | -0.001  | 118.0863 | 301 | 68.4 | Betaine            |
| 118.0873 | 117.079 | -0.001  | 118.0863 | 293 | 68.4 | Betaine            |
| 118.0873 | 117.079 | -0.001  | 118.0863 | 391 | 39.1 | Betaine            |
| 118.0873 | 117.079 | -0.001  | 118.0863 | 389 | 39.1 | Betaine            |
| 118.0873 | 117.079 | -0.001  | 118.0863 | 383 | 39.1 | Betaine            |
| 118.0873 | 117.079 | -0.001  | 118.0863 | 320 | 100  | Betaine            |
| 118.0873 | 117.079 | -0.001  | 118.0863 | 318 | 100  | Betaine            |
| 118.0873 | 117.079 | -0.001  | 118.0863 | 308 | 100  | Betaine            |
| 118.0873 | 117.079 | -0.001  | 118.0863 | 346 | 60.5 | Betaine            |
| 118.0873 | 117.079 | -0.001  | 118.0863 | 343 | 60.5 | Betaine            |
| 118.0873 | 117.079 | -0.001  | 118.0863 | 341 | 60.5 | Betaine            |
| 267.1739 | 266.165 | -0.002  | 267.172  | 266 | 100  | Tributyl phosphate |
| 267.1739 | 266.165 | -0.002  | 267.172  | 266 | 100  | Tributyl phosphate |
| 267.1739 | 266.165 | -0.002  | 267.172  | 266 | 100  | Tributyl phosphate |
| 118.0873 | 117.079 | -0.001  | 118.0863 | 331 | 98.4 | Betaine            |
| 118.0873 | 117.079 | -0.001  | 118.0863 | 326 | 98.4 | Betaine            |
| 118.0873 | 117.079 | -0.001  | 118.0863 | 323 | 98.4 | Betaine            |
| 118.0873 | 117.079 | -0.001  | 118.0863 | 437 | 72   | Betaine            |
| 118.0873 | 117.079 | -0.001  | 118.0863 | 426 | 72   | Betaine            |
| 118.0873 | 117.079 | -0.001  | 118.0863 | 421 | 72   | Betaine            |
| 118.0873 | 117.079 | -0.001  | 118.0863 | 317 | 74.1 | Betaine            |
| 118.0873 | 117.079 | -0.001  | 118.0863 | 317 | 74.1 | Betaine            |
| 118.0873 | 117.079 | -0.001  | 118.0863 | 308 | 74.1 | Betaine            |
| 118.0873 | 117.079 | -0.001  | 118.0863 | 312 | 55.2 | Betaine            |
| 118.0873 | 117.079 | -0.001  | 118.0863 | 310 | 55.2 | Betaine            |
| 118.0873 | 117.079 | -0.001  | 118.0863 | 308 | 55.2 | Betaine            |
| 118.0873 | 117.079 | -0.001  | 118.0863 | 409 | 52.8 | Betaine            |
| 118.0873 | 117.079 | -0.001  | 118.0863 | 409 | 52.8 | Betaine            |
| 118.0873 | 117.079 | -0.001  | 118.0863 | 401 | 52.8 | Betaine            |
| 118.0873 | 117.079 | -0.001  | 118.0863 | 350 | 59.1 | Betaine            |
| 118.0873 | 117.079 | -0.001  | 118.0863 | 346 | 59.1 | Betaine            |
| 118.0873 | 117.079 | -0.001  | 118.0863 | 344 | 59.1 | Betaine            |
| 118.0873 | 117.079 | -0.001  | 118.0863 | 347 | 58.6 | Betaine            |
| 118.0873 | 117.079 | -0.001  | 118.0863 | 342 | 58.6 | Betaine            |
| 118.0873 | 117.079 | -0.001  | 118.0863 | 342 | 58.6 | Betaine            |
| 279.1625 | 278.152 | -0.0035 | 279.1591 | 251 | 81.2 | Dibutyl phthalate  |
| 279.1625 | 278.152 | -0.0035 | 279.1591 | 251 | 81.2 | Dibutyl phthalate  |

|          |         |         |          |     |      |                                                    |
|----------|---------|---------|----------|-----|------|----------------------------------------------------|
| 279.1625 | 278.152 | -0.0035 | 279.1591 | 249 | 81.2 | Dibutyl phthalate                                  |
| 279.1625 | 278.152 | -0.0035 | 279.1591 | 250 | 96.5 | Dibutyl phthalate                                  |
| 279.1625 | 278.152 | -0.0035 | 279.1591 | 250 | 96.5 | Dibutyl phthalate                                  |
| 279.1625 | 278.152 | -0.0035 | 279.1591 | 248 | 96.5 | Dibutyl phthalate                                  |
| 279.1625 | 278.152 | -0.0035 | 279.1591 | 308 | 96   | Dibutyl phthalate                                  |
| 279.1625 | 278.152 | -0.0035 | 279.1591 | 300 | 96   | Dibutyl phthalate                                  |
| 279.1625 | 278.152 | -0.0035 | 279.1591 | 299 | 96   | Dibutyl phthalate                                  |
| 279.1625 | 278.152 | -0.0035 | 279.1591 | 284 | 97   | Dibutyl phthalate                                  |
| 279.1625 | 278.152 | -0.0035 | 279.1591 | 282 | 97   | Dibutyl phthalate                                  |
| 279.1625 | 278.152 | -0.0035 | 279.1591 | 281 | 97   | Dibutyl phthalate                                  |
| 399.2537 | 398.243 | -0.0031 | 399.2506 | 165 | 100  | Tris(butoxyethyl) phosphate                        |
| 399.2537 | 398.243 | -0.0031 | 399.2506 | 164 | 100  | Tris(butoxyethyl) phosphate                        |
| 399.2537 | 398.243 | -0.0031 | 399.2506 | 159 | 100  | Tris(butoxyethyl) phosphate                        |
| 399.2537 | 398.243 | -0.0031 | 399.2506 | 113 | 100  | Tris(butoxyethyl) phosphate                        |
| 399.2537 | 398.243 | -0.0031 | 399.2506 | 113 | 100  | Tris(butoxyethyl) phosphate                        |
| 399.2537 | 398.243 | -0.0031 | 399.2506 | 110 | 100  | Tris(butoxyethyl) phosphate                        |
| 444.3346 | 443.297 | -0.0305 | 444.3041 | 62  | 27.4 | Arg-Ile-Arg                                        |
| 444.3346 | 443.297 | -0.0305 | 444.3041 | 58  | 23.1 | Arg-Ile-Arg                                        |
| 444.3346 | 443.297 | -0.0305 | 444.3041 | 48  | 16.3 | Arg-Ile-Arg                                        |
| 532.3865 | 514.318 | -0.0351 | 532.3514 | 207 | 100  | 3,6,9,12,15-Pentaoxonacosan-1-ol, hydrogen sulfate |
| 532.3865 | 514.318 | -0.0351 | 532.3514 | 129 | 100  | 3,6,9,12,15-Pentaoxonacosan-1-ol, hydrogen sulfate |
| 400.3098 | 399.259 | -0.0431 | 400.2667 | 17  | 18.5 | Arg-Pro-Lys                                        |
| 400.3098 | 399.259 | -0.0431 | 400.2667 | 14  | 16.3 | Arg-Pro-Lys                                        |
| 400.3098 | 399.259 | -0.0431 | 400.2667 | 13  | 15.7 | Arg-Pro-Lys                                        |
| 186.0588 | 163.084 | 0.0149  | 186.0737 | 128 | 100  | N,N-Bis(2-hydroxyethyl)glycine                     |
| 118.0873 | 117.079 | -0.001  | 118.0863 | 448 | 48.6 | Betaine                                            |
| 118.0873 | 117.079 | -0.001  | 118.0863 | 447 | 48.6 | Betaine                                            |
| 118.0873 | 117.079 | -0.001  | 118.0863 | 442 | 48.6 | Betaine                                            |
| 118.0873 | 117.079 | -0.001  | 118.0863 | 319 | 74   | Betaine                                            |
| 118.0873 | 117.079 | -0.001  | 118.0863 | 311 | 74   | Betaine                                            |
| 118.0873 | 117.079 | -0.001  | 118.0863 | 295 | 74   | Betaine                                            |
| 118.0873 | 117.079 | -0.001  | 118.0863 | 343 | 65.7 | Betaine                                            |
| 118.0873 | 117.079 | -0.001  | 118.0863 | 342 | 65.7 | Betaine                                            |
| 118.0873 | 117.079 | -0.001  | 118.0863 | 341 | 65.7 | Betaine                                            |
| 97.0774  | 114.104 | 0.0238  | 97.1012  | 23  | 62.3 | Cyclohexanemethanol                                |
| 97.0774  | 114.104 | 0.0238  | 97.1012  | 15  | 62.3 | Cyclohexanemethanol                                |
| 97.0774  | 114.104 | 0.0238  | 97.1012  | 15  | 62.3 | Cyclohexanemethanol                                |
| 332.332  | 332.332 | -0.0009 | 332.3312 | 225 | 11.3 | Benzyl tetradecyl dimethylammonium cation          |
| 332.332  | 332.332 | -0.0009 | 332.3312 | 223 | 10.5 | Benzyl tetradecyl dimethylammonium cation          |
| 332.332  | 332.332 | -0.0009 | 332.3312 | 221 | 9.6  | Benzyl tetradecyl dimethylammonium cation          |
| 332.332  | 332.332 | -0.0009 | 332.3312 | 237 | 26.7 | Benzyl tetradecyl dimethylammonium cation          |

|          |         |         |          |     |      |                                           |
|----------|---------|---------|----------|-----|------|-------------------------------------------|
| 332.332  | 332.332 | -0.0009 | 332.3312 | 219 | 13.8 | Benzyl tetradecyl dimethylammonium cation |
| 332.332  | 332.332 | -0.0009 | 332.3312 | 211 | 10.3 | Benzyl tetradecyl dimethylammonium cation |
| 332.332  | 332.332 | -0.0009 | 332.3312 | 170 | 12.8 | Benzyl tetradecyl dimethylammonium cation |
| 332.332  | 332.332 | -0.0009 | 332.3312 | 169 | 12.4 | Benzyl tetradecyl dimethylammonium cation |
| 332.332  | 332.332 | -0.0009 | 332.3312 | 165 | 10.4 | Benzyl tetradecyl dimethylammonium cation |
| 332.332  | 332.332 | -0.0009 | 332.3312 | 213 | 18.3 | Benzyl tetradecyl dimethylammonium cation |
| 332.332  | 332.332 | -0.0009 | 332.3312 | 207 | 14.4 | Benzyl tetradecyl dimethylammonium cation |
| 332.332  | 332.332 | -0.0009 | 332.3312 | 204 | 12.7 | Benzyl tetradecyl dimethylammonium cation |
| 118.0873 | 117.079 | -0.001  | 118.0863 | 385 | 71.1 | Betaine                                   |
| 118.0873 | 117.079 | -0.001  | 118.0863 | 383 | 71.1 | Betaine                                   |
| 118.0873 | 117.079 | -0.001  | 118.0863 | 375 | 71.1 | Betaine                                   |
| 118.0873 | 117.079 | -0.001  | 118.0863 | 295 | 64.3 | Betaine                                   |
| 118.0873 | 117.079 | -0.001  | 118.0863 | 294 | 64.3 | Betaine                                   |
| 118.0873 | 117.079 | -0.001  | 118.0863 | 290 | 64.3 | Betaine                                   |
| 118.0873 | 117.079 | -0.001  | 118.0863 | 324 | 30.8 | Betaine                                   |
| 118.0873 | 117.079 | -0.001  | 118.0863 | 321 | 30.8 | Betaine                                   |
| 118.0873 | 117.079 | -0.001  | 118.0863 | 319 | 30.8 | Betaine                                   |
| 118.0873 | 117.079 | -0.001  | 118.0863 | 383 | 52.7 | Betaine                                   |
| 118.0873 | 117.079 | -0.001  | 118.0863 | 379 | 52.7 | Betaine                                   |
| 118.0873 | 117.079 | -0.001  | 118.0863 | 379 | 52.7 | Betaine                                   |
| 118.0873 | 117.079 | -0.001  | 118.0863 | 370 | 89.7 | Betaine                                   |
| 118.0873 | 117.079 | -0.001  | 118.0863 | 358 | 89.7 | Betaine                                   |
| 118.0873 | 117.079 | -0.001  | 118.0863 | 339 | 89.7 | Betaine                                   |
| 118.0873 | 117.079 | -0.001  | 118.0863 | 316 | 76.1 | Betaine                                   |
| 118.0873 | 117.079 | -0.001  | 118.0863 | 311 | 76.1 | Betaine                                   |
| 118.0873 | 117.079 | -0.001  | 118.0863 | 299 | 76.1 | Betaine                                   |
| 332.332  | 332.332 | -0.0009 | 332.3312 | 97  | 42   | Benzyl tetradecyl dimethylammonium cation |
| 332.332  | 332.332 | -0.0009 | 332.3312 | 89  | 31.3 | Benzyl tetradecyl dimethylammonium cation |
| 332.332  | 332.332 | -0.0009 | 332.3312 | 75  | 19.6 | Benzyl tetradecyl dimethylammonium cation |
| 332.332  | 332.332 | -0.0009 | 332.3312 | 150 | 21.2 | Benzyl tetradecyl dimethylammonium cation |
| 332.332  | 332.332 | -0.0009 | 332.3312 | 146 | 17.9 | Benzyl tetradecyl dimethylammonium cation |
| 332.332  | 332.332 | -0.0009 | 332.3312 | 144 | 16.5 | Benzyl tetradecyl dimethylammonium cation |
| 186.0588 | 370.196 | 0.0467  | 186.1055 | 65  | 100  | Ser-His-Lys                               |

|          |         |         |          |     |      |                                   |
|----------|---------|---------|----------|-----|------|-----------------------------------|
| 284.3311 | 284.332 | 0       | 284.3312 | 25  | 100  | Hexadecyltrimethylammonium cation |
| 284.3311 | 284.332 | 0       | 284.3312 | 202 | 84.5 | Hexadecyltrimethylammonium cation |
| 284.3311 | 284.332 | 0       | 284.3312 | 65  | 3.1  | Hexadecyltrimethylammonium cation |
| 284.3311 | 284.332 | 0       | 284.3312 | 47  | 1.6  | Hexadecyltrimethylammonium cation |
| 284.3311 | 284.332 | 0       | 284.3312 | 160 | 73.4 | Hexadecyltrimethylammonium cation |
| 284.3311 | 283.288 | -0.0363 | 284.2948 | 70  | 6.3  | Octadecanamide                    |
| 284.3311 | 283.288 | -0.0363 | 284.2948 | 70  | 6.3  | Octadecanamide                    |
| 284.3311 | 284.332 | 0       | 284.3312 | 163 | 78.8 | Hexadecyltrimethylammonium cation |
| 284.3311 | 283.288 | -0.0363 | 284.2948 | 66  | 6.2  | Octadecanamide                    |
| 284.3311 | 283.288 | -0.0363 | 284.2948 | 44  | 6.2  | Octadecanamide                    |
| 118.0873 | 117.079 | -0.001  | 118.0863 | 234 | 100  | Betaine                           |
| 118.0873 | 117.079 | -0.001  | 118.0863 | 233 | 100  | Betaine                           |
| 118.0873 | 117.079 | -0.001  | 118.0863 | 221 | 100  | Betaine                           |
| 118.0873 | 117.079 | -0.001  | 118.0863 | 430 | 60.3 | Betaine                           |
| 118.0873 | 117.079 | -0.001  | 118.0863 | 425 | 60.3 | Betaine                           |
| 118.0873 | 117.079 | -0.001  | 118.0863 | 420 | 60.3 | Betaine                           |
| 118.0873 | 117.079 | -0.001  | 118.0863 | 337 | 80.8 | Betaine                           |
| 118.0873 | 117.079 | -0.001  | 118.0863 | 336 | 80.8 | Betaine                           |
| 118.0873 | 117.079 | -0.001  | 118.0863 | 326 | 80.8 | Betaine                           |
| 118.0873 | 117.079 | -0.001  | 118.0863 | 392 | 63.6 | Betaine                           |
| 118.0873 | 117.079 | -0.001  | 118.0863 | 391 | 63.6 | Betaine                           |
| 118.0873 | 117.079 | -0.001  | 118.0863 | 388 | 63.6 | Betaine                           |
| 546.3998 | 523.364 | -0.047  | 546.353  | 115 | 100  | PAF C-16                          |
| 546.3998 | 523.364 | -0.047  | 546.353  | 104 | 100  | PAF C-16                          |
| 546.3998 | 523.364 | -0.047  | 546.353  | 89  | 100  | PAF C-16                          |
| 546.3998 | 523.364 | -0.047  | 546.353  | 95  | 100  | PAF C-16                          |
| 118.0873 | 117.079 | -0.001  | 118.0863 | 358 | 48   | Betaine                           |
| 118.0873 | 117.079 | -0.001  | 118.0863 | 357 | 48   | Betaine                           |
| 118.0873 | 117.079 | -0.001  | 118.0863 | 357 | 48   | Betaine                           |
| 118.0873 | 117.079 | -0.001  | 118.0863 | 419 | 100  | Betaine                           |
| 118.0873 | 117.079 | -0.001  | 118.0863 | 416 | 100  | Betaine                           |
| 118.0873 | 117.079 | -0.001  | 118.0863 | 412 | 100  | Betaine                           |
| 118.0873 | 117.079 | -0.001  | 118.0863 | 386 | 98.4 | Betaine                           |
| 118.0873 | 117.079 | -0.001  | 118.0863 | 374 | 98.4 | Betaine                           |
| 118.0873 | 117.079 | -0.001  | 118.0863 | 350 | 98.4 | Betaine                           |
| 118.0873 | 117.079 | -0.001  | 118.0863 | 310 | 66.3 | Betaine                           |
| 118.0873 | 117.079 | -0.001  | 118.0863 | 310 | 66.3 | Betaine                           |
| 118.0873 | 117.079 | -0.001  | 118.0863 | 305 | 66.3 | Betaine                           |
| 284.3311 | 284.332 | 0       | 284.3312 | 160 | 77.5 | Hexadecyltrimethylammonium cation |

|          |         |        |          |     |      |                                   |
|----------|---------|--------|----------|-----|------|-----------------------------------|
| 284.3311 | 284.332 | 0      | 284.3312 | 19  | 2.6  | Hexadecyltrimethylammonium cation |
| 284.3311 | 284.332 | 0      | 284.3312 | 18  | 2.5  | Hexadecyltrimethylammonium cation |
| 186.0588 | 370.196 | 0.0467 | 186.1055 | 76  | 100  | Ser-His-Lys                       |
| 118.0873 | 117.079 | -0.001 | 118.0863 | 413 | 63.5 | Betaine                           |
| 118.0873 | 117.079 | -0.001 | 118.0863 | 409 | 63.5 | Betaine                           |
| 118.0873 | 117.079 | -0.001 | 118.0863 | 404 | 63.5 | Betaine                           |
| 118.0873 | 117.079 | -0.001 | 118.0863 | 360 | 91.2 | Betaine                           |
| 118.0873 | 117.079 | -0.001 | 118.0863 | 343 | 91.2 | Betaine                           |
| 118.0873 | 117.079 | -0.001 | 118.0863 | 316 | 91.2 | Betaine                           |
| 118.0873 | 117.079 | -0.001 | 118.0863 | 336 | 74.1 | Betaine                           |
| 118.0873 | 117.079 | -0.001 | 118.0863 | 335 | 74.1 | Betaine                           |
| 118.0873 | 117.079 | -0.001 | 118.0863 | 331 | 74.1 | Betaine                           |
| 140.0692 | 139.1   | 0.038  | 140.107  | 98  | 100  | Tropinone                         |
| 140.0692 | 139.1   | 0.038  | 140.107  | 97  | 100  | Tropinone                         |
| 140.0692 | 139.1   | 0.038  | 140.107  | 96  | 100  | Tropinone                         |
| 118.0873 | 117.079 | -0.001 | 118.0863 | 421 | 62.4 | Betaine                           |
| 118.0873 | 117.079 | -0.001 | 118.0863 | 417 | 62.4 | Betaine                           |
| 118.0873 | 117.079 | -0.001 | 118.0863 | 409 | 62.4 | Betaine                           |
| 118.0873 | 117.079 | -0.001 | 118.0863 | 320 | 63.9 | Betaine                           |
| 118.0873 | 117.079 | -0.001 | 118.0863 | 320 | 63.9 | Betaine                           |
| 118.0873 | 117.079 | -0.001 | 118.0863 | 317 | 63.9 | Betaine                           |
| 118.0873 | 117.079 | -0.001 | 118.0863 | 282 | 64.4 | Betaine                           |
| 118.0873 | 117.079 | -0.001 | 118.0863 | 281 | 64.4 | Betaine                           |
| 118.0873 | 117.079 | -0.001 | 118.0863 | 275 | 64.4 | Betaine                           |
| 118.0873 | 117.079 | -0.001 | 118.0863 | 286 | 41.8 | Betaine                           |
| 118.0873 | 117.079 | -0.001 | 118.0863 | 285 | 41.8 | Betaine                           |
| 118.0873 | 117.079 | -0.001 | 118.0863 | 281 | 41.8 | Betaine                           |
| 118.0873 | 117     | 0      | 118.09   | 431 | 31.7 | Betaine                           |
| 118.0873 | 117.079 | -0.001 | 118.0863 | 425 | 24.9 | Betaine                           |
| 118.0873 | 117.079 | -0.001 | 118.0863 | 422 | 24.9 | Betaine                           |
| 118.0873 | 117.079 | -0.001 | 118.0863 | 287 | 70.3 | Betaine                           |
| 118.0873 | 117.079 | -0.001 | 118.0863 | 285 | 70.3 | Betaine                           |
| 118.0873 | 117.079 | -0.001 | 118.0863 | 281 | 70.3 | Betaine                           |
| 118.0873 | 117.079 | -0.001 | 118.0863 | 383 | 75.4 | Betaine                           |
| 118.0873 | 117.079 | -0.001 | 118.0863 | 382 | 75.4 | Betaine                           |
| 118.0873 | 117.079 | -0.001 | 118.0863 | 379 | 75.4 | Betaine                           |
| 428.3751 | 427     | 0.03   | 428.41   | 233 | 51.5 | N-Octanoylsphinganine,D-erythro   |
| 428.3751 | 427     | 0.03   | 428.41   | 224 | 37.4 | N-Octanoylsphinganine,D-erythro   |
| 428.3751 | 427     | 0.03   | 428.41   | 198 | 11.2 | N-Octanoylsphinganine,D-erythro   |
| 186.0588 | 163.084 | 0.0149 | 186.0737 | 151 | 89.1 | N,N-Bis(2-hydroxyethyl)glycine    |
| 186.0588 | 163.084 | 0.0149 | 186.0737 | 97  | 89.1 | N,N-Bis(2-hydroxyethyl)glycine    |
| 186.0588 | 203.091 | 0.0285 | 186.0873 | 47  | 6.2  | Ala-Asn                           |

|          |         |         |          |     |      |                                          |
|----------|---------|---------|----------|-----|------|------------------------------------------|
| 118.0873 | 117.079 | -0.001  | 118.0863 | 333 | 100  | Betaine                                  |
| 118.0873 | 117.079 | -0.001  | 118.0863 | 331 | 100  | Betaine                                  |
| 118.0873 | 117.079 | -0.001  | 118.0863 | 330 | 100  | Betaine                                  |
| 118.0873 | 117.079 | -0.001  | 118.0863 | 370 | 66.4 | Betaine                                  |
| 118.0873 | 117.079 | -0.001  | 118.0863 | 367 | 66.4 | Betaine                                  |
| 118.0873 | 117.079 | -0.001  | 118.0863 | 356 | 66.4 | Betaine                                  |
| 118.0873 | 117.079 | -0.001  | 118.0863 | 314 | 74.1 | Betaine                                  |
| 118.0873 | 117.079 | -0.001  | 118.0863 | 313 | 74.1 | Betaine                                  |
| 118.0873 | 117.079 | -0.001  | 118.0863 | 309 | 74.1 | Betaine                                  |
| 118.0873 | 117.079 | -0.001  | 118.0863 | 256 | 65.4 | Betaine                                  |
| 118.0873 | 117.079 | -0.001  | 118.0863 | 256 | 65.4 | Betaine                                  |
| 118.0873 | 117.079 | -0.001  | 118.0863 | 252 | 65.4 | Betaine                                  |
| 186.0588 | 370.196 | 0.0467  | 186.1055 | 70  | 100  | Ser-His-Lys                              |
| 224.1293 | 446.228 | -0.0081 | 224.1212 | 124 | 55.4 | Tyr-His-Lys                              |
| 224.1293 | 223.084 | -0.0376 | 224.0917 | 112 | 36.9 | N-Acetyl-L-tyrosine                      |
| 224.1293 | 223.084 | -0.0376 | 224.0917 | 65  | 7.7  | Bendiocarb                               |
| 224.1293 | 223.084 | -0.0376 | 224.0917 | 328 | 93.2 | N-Acetyl-L-tyrosine                      |
| 224.1293 | 223.084 | -0.0376 | 224.0917 | 318 | 93.2 | N-Acetyl-L-tyrosine                      |
| 224.1293 | 223.084 | -0.0376 | 224.0917 | 284 | 93.2 | N-Acetyl-L-tyrosine                      |
| 224.1293 | 223.084 | -0.0376 | 224.0917 | 303 | 92.7 | N-Acetyl-L-tyrosine                      |
| 224.1293 | 223.084 | -0.0376 | 224.0917 | 280 | 92.7 | N-Acetyl-L-tyrosine                      |
| 224.1293 | 223.084 | -0.0376 | 224.0917 | 240 | 92.7 | N-Acetyl-L-tyrosine                      |
| 195.1236 | 194.115 | -0.0009 | 195.1227 | 248 | 100  | Tetraethylene glycol                     |
| 195.1236 | 194.115 | -0.0009 | 195.1227 | 247 | 100  | Tetraethylene glycol                     |
| 195.1236 | 194.115 | -0.0009 | 195.1227 | 246 | 100  | Tetraethylene glycol                     |
| 118.0873 | 117.079 | -0.001  | 118.0863 | 325 | 100  | Betaine                                  |
| 118.0873 | 117.079 | -0.001  | 118.0863 | 323 | 100  | Betaine                                  |
| 118.0873 | 117.079 | -0.001  | 118.0863 | 320 | 100  | Betaine                                  |
| 118.0873 | 117.079 | -0.001  | 118.0863 | 488 | 66.2 | Betaine                                  |
| 118.0873 | 117.079 | -0.001  | 118.0863 | 482 | 66.2 | Betaine                                  |
| 118.0873 | 117.079 | -0.001  | 118.0863 | 476 | 66.2 | Betaine                                  |
| 118.0873 | 117.079 | -0.001  | 118.0863 | 382 | 97.3 | Betaine                                  |
| 118.0873 | 117.079 | -0.001  | 118.0863 | 374 | 97.3 | Betaine                                  |
| 118.0873 | 117.079 | -0.001  | 118.0863 | 369 | 97.3 | Betaine                                  |
| 118.0873 | 117.079 | -0.001  | 118.0863 | 389 | 62.7 | Betaine                                  |
| 118.0873 | 117.079 | -0.001  | 118.0863 | 385 | 62.7 | Betaine                                  |
| 118.0873 | 117.079 | -0.001  | 118.0863 | 382 | 62.7 | Betaine                                  |
| 360.3626 | 360.363 | -0.0002 | 360.3625 | 283 | 40.4 | Benzyl hexadecyl dimethylammonium cation |
| 360.3626 | 360.363 | -0.0002 | 360.3625 | 261 | 16   | Benzyl hexadecyl dimethylammonium cation |
| 360.3626 | 360.363 | -0.0002 | 360.3625 | 260 | 15.4 | Benzyl hexadecyl dimethylammonium cation |
| 360.3626 | 360.363 | -0.0002 | 360.3625 | 299 | 41.1 | Benzyl hexadecyl dimethylammonium cation |
| 360.3626 | 360.363 | -0.0002 | 360.3625 | 281 | 21.2 | Benzyl hexadecyl dimethylammonium cation |

|          |         |         |          |     |      |                                          |
|----------|---------|---------|----------|-----|------|------------------------------------------|
| 360.3626 | 360.363 | -0.0002 | 360.3625 | 280 | 20.4 | Benzyl hexadecyl dimethylammonium cation |
| 360.3626 | 360.363 | -0.0002 | 360.3625 | 350 | 87.6 | Benzyl hexadecyl dimethylammonium cation |
| 360.3626 | 360.363 | -0.0002 | 360.3625 | 203 | 2.5  | Benzyl hexadecyl dimethylammonium cation |
| 360.3626 | 360.363 | -0.0002 | 360.3625 | 193 | 1.8  | Benzyl hexadecyl dimethylammonium cation |
| 360.3626 | 360.363 | -0.0002 | 360.3625 | 309 | 72.3 | Benzyl hexadecyl dimethylammonium cation |
| 360.3626 | 360.363 | -0.0002 | 360.3625 | 250 | 13.1 | Benzyl hexadecyl dimethylammonium cation |
| 360.3626 | 360.363 | -0.0002 | 360.3625 | 231 | 6.3  | Benzyl hexadecyl dimethylammonium cation |
| 97.0774  | 114.104 | 0.0238  | 97.1012  | 24  | 23.1 | Cyclohexanol, 1-methyl-                  |
| 97.0774  | 114.104 | 0.0238  | 97.1012  | 16  | 17.2 | Cycloheptanol                            |
| 97.0774  | 114.104 | 0.0238  | 97.1012  | 14  | 15.9 | Cyclohexanemethanol                      |
| 118.0873 | 117.079 | -0.001  | 118.0863 | 256 | 55.8 | Betaine                                  |
| 118.0873 | 117.079 | -0.001  | 118.0863 | 249 | 55.8 | Betaine                                  |
| 118.0873 | 117.079 | -0.001  | 118.0863 | 248 | 55.8 | Betaine                                  |
| 118.0873 | 117.079 | -0.001  | 118.0863 | 381 | 45   | Betaine                                  |
| 118.0873 | 117.079 | -0.001  | 118.0863 | 379 | 45   | Betaine                                  |
| 118.0873 | 117.079 | -0.001  | 118.0863 | 375 | 45   | Betaine                                  |
| 118.0873 | 117.079 | -0.001  | 118.0863 | 304 | 76.5 | Betaine                                  |
| 118.0873 | 117.079 | -0.001  | 118.0863 | 302 | 76.5 | Betaine                                  |
| 118.0873 | 117.079 | -0.001  | 118.0863 | 296 | 76.5 | Betaine                                  |
| 118.0873 | 117.079 | -0.001  | 118.0863 | 276 | 61.5 | Betaine                                  |
| 118.0873 | 117.079 | -0.001  | 118.0863 | 275 | 61.5 | Betaine                                  |
| 118.0873 | 117.079 | -0.001  | 118.0863 | 270 | 61.5 | Betaine                                  |
| 360.3626 | 360.363 | -0.0002 | 360.3625 | 285 | 56.7 | Benzyl hexadecyl dimethylammonium cation |
| 360.3626 | 360.363 | -0.0002 | 360.3625 | 206 | 6.5  | Benzyl hexadecyl dimethylammonium cation |
| 360.3626 | 360.363 | -0.0002 | 360.3625 | 204 | 6    | Benzyl hexadecyl dimethylammonium cation |
| 118.0873 | 117.079 | -0.001  | 118.0863 | 424 | 59.2 | Betaine                                  |
| 118.0873 | 117.079 | -0.001  | 118.0863 | 421 | 59.2 | Betaine                                  |
| 118.0873 | 117.079 | -0.001  | 118.0863 | 410 | 59.2 | Betaine                                  |
| 118.0873 | 117.079 | -0.001  | 118.0863 | 261 | 65.9 | Betaine                                  |
| 118.0873 | 117.079 | -0.001  | 118.0863 | 260 | 65.9 | Betaine                                  |
| 118.0873 | 117.079 | -0.001  | 118.0863 | 256 | 65.9 | Betaine                                  |
| 118.0873 | 117.079 | -0.001  | 118.0863 | 398 | 41.3 | Betaine                                  |
| 118.0873 | 117.079 | -0.001  | 118.0863 | 396 | 41.3 | Betaine                                  |
| 118.0873 | 117.079 | -0.001  | 118.0863 | 396 | 41.3 | Betaine                                  |
| 369.3861 | 386.355 | -0.0345 | 369.3516 | 260 | 55.4 | Cholesterol                              |
| 369.3861 | 386.355 | -0.0345 | 369.3516 | 255 | 44.6 | Cholestan-3-one, (5.alpha.)-             |
| 369.3861 | 386.355 | -0.0345 | 369.3516 | 245 | 44.6 | Cholestan-3-one, (5.alpha.)-             |



|          |         |         |          |     |      |                                       |
|----------|---------|---------|----------|-----|------|---------------------------------------|
| 97.0774  | 114.104 | 0.0238  | 97.1012  | 71  | 100  | Cyclopentanemethanol, .alpha.-methyl- |
| 97.0774  | 114.104 | 0.0238  | 97.1012  | 62  | 100  | Cyclopentanemethanol, .alpha.-methyl- |
| 186.0588 | 370.196 | 0.0467  | 186.1055 | 50  | 100  | Ser-His-Lys                           |
| 385.3803 | 384.339 | -0.0338 | 385.3465 | 21  | 53.1 | Cholesta-5,7-dien-3-ol, (3.beta.)-    |
| 385.3803 | 402.35  | -0.0338 | 385.3465 | 18  | 46.9 | 25-Hydroxycholesterol                 |
| 385.3803 | 384.339 | -0.0338 | 385.3465 | 18  | 53.1 | Cholesta-5,7-dien-3-ol, (3.beta.)-    |
| 385.3803 | 384.339 | -0.0338 | 385.3465 | 102 | 100  | Cholecalciferol                       |
| 385.3803 | 384.339 | -0.0338 | 385.3465 | 96  | 100  | Cholecalciferol                       |
| 385.3803 | 384.339 | -0.0338 | 385.3465 | 95  | 100  | Cholecalciferol                       |
| 385.3803 | 402.35  | -0.0338 | 385.3465 | 3   | 100  | 25-Hydroxycholesterol                 |
| 195.1236 | 194.115 | -0.0009 | 195.1227 | 272 | 100  | Tetraethylene glycol                  |
| 195.1236 | 194.115 | -0.0009 | 195.1227 | 271 | 100  | Tetraethylene glycol                  |
| 195.1236 | 194.115 | -0.0009 | 195.1227 | 268 | 100  | Tetraethylene glycol                  |
| 118.0873 | 117.079 | -0.001  | 118.0863 | 225 | 100  | Betaine                               |
| 118.0873 | 117.079 | -0.001  | 118.0863 | 219 | 100  | Betaine                               |
| 118.0873 | 117.079 | -0.001  | 118.0863 | 213 | 100  | Betaine                               |
| 118.0873 | 117.079 | -0.001  | 118.0863 | 424 | 44.4 | Betaine                               |
| 118.0873 | 117     | 0       | 118.09   | 416 | 33.1 | Betaine                               |
| 118.0873 | 117.079 | -0.001  | 118.0863 | 413 | 44.4 | Betaine                               |
| 118.0873 | 117.079 | -0.001  | 118.0863 | 299 | 68.2 | Betaine                               |
| 118.0873 | 117.079 | -0.001  | 118.0863 | 298 | 68.2 | Betaine                               |
| 118.0873 | 117.079 | -0.001  | 118.0863 | 291 | 68.2 | Betaine                               |
| 118.0873 | 117.079 | -0.001  | 118.0863 | 340 | 60.9 | Betaine                               |
| 118.0873 | 117.079 | -0.001  | 118.0863 | 336 | 60.9 | Betaine                               |
| 118.0873 | 117.079 | -0.001  | 118.0863 | 334 | 60.9 | Betaine                               |
| 224.1293 | 223.084 | -0.0376 | 224.0917 | 222 | 76.2 | N-Acetyl-L-tyrosine                   |
| 224.1293 | 223.084 | -0.0376 | 224.0917 | 215 | 76.2 | N-Acetyl-L-tyrosine                   |
| 224.1293 | 223.084 | -0.0376 | 224.0917 | 201 | 76.2 | N-Acetyl-L-tyrosine                   |
| 224.1293 | 223.084 | -0.0376 | 224.0917 | 265 | 83.2 | N-Acetyl-L-tyrosine                   |
| 224.1293 | 223.084 | -0.0376 | 224.0917 | 255 | 83.2 | N-Acetyl-L-tyrosine                   |
| 224.1293 | 223.084 | -0.0376 | 224.0917 | 247 | 83.2 | N-Acetyl-L-tyrosine                   |
| 224.1293 | 223.084 | -0.0376 | 224.0917 | 251 | 89.1 | N-Acetyl-L-tyrosine                   |
| 224.1293 | 223.084 | -0.0376 | 224.0917 | 236 | 89.1 | N-Acetyl-L-tyrosine                   |
| 224.1293 | 223.084 | -0.0376 | 224.0917 | 210 | 89.1 | N-Acetyl-L-tyrosine                   |
| 118.0873 | 117.079 | -0.001  | 118.0863 | 353 | 32.5 | Betaine                               |
| 118.0873 | 117.079 | -0.001  | 118.0863 | 351 | 32.5 | Betaine                               |
| 118.0873 | 117     | 0       | 118.09   | 349 | 27.4 | Betaine                               |
| 118.0873 | 117.079 | -0.001  | 118.0863 | 474 | 67.4 | Betaine                               |
| 118.0873 | 117.079 | -0.001  | 118.0863 | 468 | 67.4 | Betaine                               |
| 118.0873 | 117.079 | -0.001  | 118.0863 | 466 | 67.4 | Betaine                               |
| 118.0873 | 117.079 | -0.001  | 118.0863 | 276 | 81   | Betaine                               |
| 118.0873 | 117.079 | -0.001  | 118.0863 | 266 | 81   | Betaine                               |
| 118.0873 | 117.079 | -0.001  | 118.0863 | 266 | 81   | Betaine                               |
| 118.0873 | 117.079 | -0.001  | 118.0863 | 409 | 61.5 | Betaine                               |
| 118.0873 | 117.079 | -0.001  | 118.0863 | 406 | 61.5 | Betaine                               |

|          |         |         |          |     |      |                                               |
|----------|---------|---------|----------|-----|------|-----------------------------------------------|
| 118.0873 | 117.079 | -0.001  | 118.0863 | 399 | 61.5 | Betaine                                       |
| 97.0774  | 114.104 | 0.0238  | 97.1012  | 34  | 22.5 | Cyclohexanol, 1-methyl-                       |
| 97.0774  | 114.104 | 0.0238  | 97.1012  | 28  | 17.7 | Cyclohexanemethanol                           |
| 97.0774  | 114.104 | 0.0238  | 97.1012  | 27  | 17   | Cyclohexanol, 4-methyl-, trans-               |
| 186.0588 | 163.084 | 0.0149  | 186.0737 | 160 | 100  | N,N-Bis(2-hydroxyethyl)glycine                |
| 224.1293 | 223.076 | -0.0456 | 224.0837 | 47  | 100  | Desmethylketamine                             |
| 224.1293 | 223.084 | -0.0376 | 224.0917 | 218 | 100  | N-Acetyl-L-tyrosine                           |
| 224.1293 | 223.084 | -0.0376 | 224.0917 | 192 | 100  | N-Acetyl-L-tyrosine                           |
| 224.1293 | 223.084 | -0.0376 | 224.0917 | 161 | 100  | N-Acetyl-L-tyrosine                           |
| 224.1293 | 223.084 | -0.0376 | 224.0917 | 260 | 86.1 | N-Acetyl-L-tyrosine                           |
| 224.1293 | 223.084 | -0.0376 | 224.0917 | 245 | 86.1 | N-Acetyl-L-tyrosine                           |
| 224.1293 | 223.084 | -0.0376 | 224.0917 | 215 | 86.1 | N-Acetyl-L-tyrosine                           |
| 400.3796 | 400.343 | -0.0375 | 400.3421 | 191 | 27.7 | Palmitoyl-L-carnitine cation                  |
| 400.3796 | 400.343 | -0.0375 | 400.3421 | 182 | 20.1 | Palmitoyl-L-carnitine cation                  |
| 400.3796 | 400.343 | -0.0375 | 400.3421 | 175 | 15.4 | Palmitoyl-L-carnitine cation                  |
| 118.0873 | 117     | 0       | 118.09   | 319 | 25.8 | Betaine                                       |
| 118.0873 | 117.079 | -0.001  | 118.0863 | 315 | 21.8 | Betaine                                       |
| 118.0873 | 117.079 | -0.001  | 118.0863 | 315 | 21.8 | Betaine                                       |
| 118.0873 | 117.079 | -0.001  | 118.0863 | 417 | 43.4 | Betaine                                       |
| 118.0873 | 117.079 | -0.001  | 118.0863 | 412 | 43.4 | Betaine                                       |
| 118.0873 | 117.079 | -0.001  | 118.0863 | 408 | 43.4 | Betaine                                       |
| 118.0873 | 117.079 | -0.001  | 118.0863 | 346 | 84.3 | Betaine                                       |
| 118.0873 | 117.079 | -0.001  | 118.0863 | 345 | 84.3 | Betaine                                       |
| 118.0873 | 117.079 | -0.001  | 118.0863 | 337 | 84.3 | Betaine                                       |
| 118.0873 | 117.079 | -0.001  | 118.0863 | 269 | 72.2 | Betaine                                       |
| 118.0873 | 117.079 | -0.001  | 118.0863 | 268 | 72.2 | Betaine                                       |
| 118.0873 | 117.079 | -0.001  | 118.0863 | 259 | 72.2 | Betaine                                       |
| 282.2797 | 281.272 | -0.0006 | 282.2791 | 77  | 100  | 9-Octadecenamide, (Z)-                        |
| 282.2797 | 281.272 | -0.0006 | 282.2791 | 60  | 100  | 9-Octadecenamide, (Z)-                        |
| 282.2797 | 281.272 | -0.0006 | 282.2791 | 58  | 100  | 9-Octadecenamide, (Z)-                        |
| 282.2797 | 281.272 | -0.0006 | 282.2791 | 104 | 100  | 9-Octadecenamide, (Z)-                        |
| 282.2797 | 281.272 | -0.0006 | 282.2791 | 103 | 100  | 9-Octadecenamide, (Z)-                        |
| 282.2797 | 281.272 | -0.0006 | 282.2791 | 102 | 100  | 9-Octadecenamide, (Z)-                        |
| 282.2797 | 281.272 | -0.0006 | 282.2791 | 215 | 93.2 | 9-Octadecenamide, (Z)-                        |
| 282.2797 | 281.272 | -0.0006 | 282.2791 | 211 | 93.2 | 9-Octadecenamide, (Z)-                        |
| 282.2797 | 281.272 | -0.0006 | 282.2791 | 209 | 93.2 | 9-Octadecenamide, (Z)-                        |
| 140.0692 | 139.027 | -0.035  | 140.0342 | 100 | 100  | 3-Pyridinecarboxylic acid, 1,6-dihydro-6-oxo- |
| 140.0692 | 139.027 | -0.035  | 140.0342 | 99  | 100  | 3-Pyridinecarboxylic acid, 1,6-dihydro-6-oxo- |
| 140.0692 | 139.027 | -0.035  | 140.0342 | 89  | 100  | 3-Pyridinecarboxylic acid, 1,6-dihydro-6-oxo- |
| 186.0588 | 163.084 | 0.0149  | 186.0737 | 118 | 86.6 | N,N-Bis(2-hydroxyethyl)glycine                |
| 186.0588 | 203.091 | 0.0285  | 186.0873 | 51  | 13.4 | Ala-Asn                                       |
| 186.0588 | 163.084 | 0.0149  | 186.0737 | 141 | 92   | N,N-Bis(2-hydroxyethyl)glycine                |
| 186.0588 | 370.196 | 0.0467  | 186.1055 | 52  | 8    | Ser-His-Lys                                   |
| 186.0588 | 163.084 | 0.0149  | 186.0737 | 135 | 100  | N,N-Bis(2-hydroxyethyl)glycine                |

|          |         |         |          |     |      |                                           |
|----------|---------|---------|----------|-----|------|-------------------------------------------|
| 186.0588 | 163.084 | 0.0149  | 186.0737 | 106 | 100  | N,N-Bis(2-hydroxyethyl)glycine            |
| 186.0588 | 163.084 | 0.0149  | 186.0737 | 147 | 100  | N,N-Bis(2-hydroxyethyl)glycine            |
| 118.0873 | 117.079 | -0.001  | 118.0863 | 452 | 36.1 | Betaine                                   |
| 118.0873 | 117.079 | -0.001  | 118.0863 | 448 | 36.1 | Betaine                                   |
| 118.0873 | 117.079 | -0.001  | 118.0863 | 448 | 36.1 | Betaine                                   |
| 118.0873 | 117     | 0       | 118.09   | 331 | 27.6 | Betaine                                   |
| 118.0873 | 117.079 | -0.001  | 118.0863 | 326 | 22.3 | Betaine                                   |
| 118.0873 | 117.079 | -0.001  | 118.0863 | 326 | 22.3 | Betaine                                   |
| 118.0873 | 117.079 | -0.001  | 118.0863 | 360 | 61.5 | Betaine                                   |
| 118.0873 | 117.079 | -0.001  | 118.0863 | 356 | 61.5 | Betaine                                   |
| 118.0873 | 117.079 | -0.001  | 118.0863 | 353 | 61.5 | Betaine                                   |
| 186.0588 | 203.091 | 0.0285  | 186.0873 | 66  | 73.1 | Ala-Asn                                   |
| 186.0588 | 163.084 | 0.0149  | 186.0737 | 37  | 20.7 | N,N-Bis(2-hydroxyethyl)glycine            |
| 186.0588 | 168.042 | 0.0173  | 186.0761 | 11  | 6.2  | 3-Hydroxy-4-methoxybenzoic acid           |
| 186.0588 | 163.084 | 0.0149  | 186.0737 | 141 | 100  | N,N-Bis(2-hydroxyethyl)glycine            |
| 393.2988 | 392.293 | 0.0011  | 393.2999 | 89  | 100  | Deoxycholic acid                          |
| 118.0873 | 117.079 | -0.001  | 118.0863 | 264 | 33.9 | Betaine                                   |
| 118.0873 | 117.079 | -0.001  | 118.0863 | 264 | 33.9 | Betaine                                   |
| 118.0873 | 117     | 0       | 118.09   | 262 | 31.3 | Betaine                                   |
| 118.0873 | 117.079 | -0.001  | 118.0863 | 427 | 65.1 | Betaine                                   |
| 118.0873 | 117.079 | -0.001  | 118.0863 | 425 | 65.1 | Betaine                                   |
| 118.0873 | 117.079 | -0.001  | 118.0863 | 414 | 65.1 | Betaine                                   |
| 118.0873 | 117.079 | -0.001  | 118.0863 | 295 | 49.6 | Betaine                                   |
| 118.0873 | 117.079 | -0.001  | 118.0863 | 292 | 49.6 | Betaine                                   |
| 118.0873 | 117.079 | -0.001  | 118.0863 | 291 | 49.6 | Betaine                                   |
| 118.0873 | 117.079 | -0.001  | 118.0863 | 413 | 59.4 | Betaine                                   |
| 118.0873 | 117.079 | -0.001  | 118.0863 | 412 | 59.4 | Betaine                                   |
| 118.0873 | 117.079 | -0.001  | 118.0863 | 411 | 59.4 | Betaine                                   |
| 97.0774  | 114.104 | 0.0238  | 97.1012  | 26  | 45.3 | Cyclohexanol, 2-methyl-, trans-           |
| 97.0774  | 114.104 | 0.0238  | 97.1012  | 17  | 32.9 | Cyclohexanol, 4-methyl-, trans-           |
| 97.0774  | 114.104 | 0.0238  | 97.1012  | 16  | 45.3 | Cyclohexanol, 2-methyl-, trans-           |
| 186.0588 | 370.196 | 0.0467  | 186.1055 | 60  | 100  | Ser-His-Lys                               |
| 186.0588 | 163.084 | 0.0149  | 186.0737 | 180 | 100  | N,N-Bis(2-hydroxyethyl)glycine            |
| 371.3164 | 370.308 | -0.0009 | 371.3156 | 177 | 100  | Hexanedioic acid, bis(2-ethylhexyl) ester |
| 371.3164 | 370.308 | -0.0009 | 371.3156 | 118 | 100  | Hexanedioic acid, bis(2-ethylhexyl) ester |
| 371.3164 | 370.308 | -0.0009 | 371.3156 | 111 | 100  | Hexanedioic acid, bis(2-ethylhexyl) ester |
| 371.3164 | 370.308 | -0.0009 | 371.3156 | 131 | 100  | Hexanedioic acid, bis(2-ethylhexyl) ester |
| 371.3164 | 370.308 | -0.0009 | 371.3156 | 128 | 100  | Hexanedioic acid, bis(2-ethylhexyl) ester |
| 371.3164 | 370.308 | -0.0009 | 371.3156 | 126 | 100  | Hexanedioic acid, bis(2-ethylhexyl) ester |

|          |         |         |          |     |      |                                           |
|----------|---------|---------|----------|-----|------|-------------------------------------------|
| 371.3164 | 370.308 | -0.0009 | 371.3156 | 49  | 100  | Hexanedioic acid, bis(2-ethylhexyl) ester |
| 371.3164 | 370.308 | -0.0009 | 371.3156 | 40  | 100  | Hexanedioic acid, bis(2-ethylhexyl) ester |
| 371.3164 | 370.308 | -0.0009 | 371.3156 | 22  | 100  | Hexanedioic acid, bis(2-ethylhexyl) ester |
| 371.3164 | 370.308 | -0.0009 | 371.3156 | 170 | 100  | Hexanedioic acid, bis(2-ethylhexyl) ester |
| 371.3164 | 370.308 | -0.0009 | 371.3156 | 150 | 100  | Hexanedioic acid, bis(2-ethylhexyl) ester |
| 371.3164 | 370.308 | -0.0009 | 371.3156 | 106 | 100  | Hexanedioic acid, bis(2-ethylhexyl) ester |
| 118.0873 | 117.079 | -0.001  | 118.0863 | 329 | 60.7 | Betaine                                   |
| 118.0873 | 117.079 | -0.001  | 118.0863 | 329 | 60.7 | Betaine                                   |
| 118.0873 | 117.079 | -0.001  | 118.0863 | 319 | 60.7 | Betaine                                   |
| 118.0873 | 117.079 | -0.001  | 118.0863 | 419 | 47   | Betaine                                   |
| 118.0873 | 117.079 | -0.001  | 118.0863 | 417 | 47   | Betaine                                   |
| 118.0873 | 117.079 | -0.001  | 118.0863 | 415 | 47   | Betaine                                   |
| 118.0873 | 117.079 | -0.001  | 118.0863 | 339 | 98.2 | Betaine                                   |
| 118.0873 | 117.079 | -0.001  | 118.0863 | 334 | 98.2 | Betaine                                   |
| 118.0873 | 117.079 | -0.001  | 118.0863 | 317 | 98.2 | Betaine                                   |
| 118.0873 | 117.079 | -0.001  | 118.0863 | 341 | 59.5 | Betaine                                   |
| 118.0873 | 117.079 | -0.001  | 118.0863 | 341 | 59.5 | Betaine                                   |
| 118.0873 | 117.079 | -0.001  | 118.0863 | 331 | 59.5 | Betaine                                   |
| 186.0588 | 163.084 | 0.0149  | 186.0737 | 192 | 92.6 | N,N-Bis(2-hydroxyethyl)glycine            |
| 186.0588 | 163.084 | 0.0149  | 186.0737 | 159 | 92.6 | N,N-Bis(2-hydroxyethyl)glycine            |
| 186.0588 | 203.091 | 0.0285  | 186.0873 | 96  | 7.4  | Ala-Asn                                   |
| 186.0588 | 163.084 | 0.0149  | 186.0737 | 146 | 93   | N,N-Bis(2-hydroxyethyl)glycine            |
| 186.0588 | 370.196 | 0.0467  | 186.1055 | 47  | 7    | Ser-His-Lys                               |
| 371.3164 | 370.308 | -0.0009 | 371.3156 | 182 | 100  | Hexanedioic acid, bis(2-ethylhexyl) ester |
| 371.3164 | 370.308 | -0.0009 | 371.3156 | 80  | 100  | Hexanedioic acid, bis(2-ethylhexyl) ester |
| 371.3164 | 370.308 | -0.0009 | 371.3156 | 77  | 100  | Hexanedioic acid, bis(2-ethylhexyl) ester |
| 371.3164 | 370.308 | -0.0009 | 371.3156 | 165 | 100  | Hexanedioic acid, bis(2-ethylhexyl) ester |
| 371.3164 | 370.308 | -0.0009 | 371.3156 | 147 | 100  | Hexanedioic acid, bis(2-ethylhexyl) ester |
| 371.3164 | 370.308 | -0.0009 | 371.3156 | 126 | 100  | Hexanedioic acid, bis(2-ethylhexyl) ester |
| 371.3164 | 370.308 | -0.0009 | 371.3156 | 69  | 100  | Hexanedioic acid, bis(2-ethylhexyl) ester |
| 371.3164 | 370.308 | -0.0009 | 371.3156 | 54  | 100  | Hexanedioic acid, bis(2-ethylhexyl) ester |
| 371.3164 | 370.308 | -0.0009 | 371.3156 | 45  | 100  | Hexanedioic acid, bis(2-ethylhexyl) ester |

|          |         |         |          |     |      |                                           |
|----------|---------|---------|----------|-----|------|-------------------------------------------|
| 371.3164 | 370.308 | -0.0009 | 371.3156 | 116 | 100  | Hexanedioic acid, bis(2-ethylhexyl) ester |
| 371.3164 | 370.308 | -0.0009 | 371.3156 | 95  | 100  | Hexanedioic acid, bis(2-ethylhexyl) ester |
| 371.3164 | 370.308 | -0.0009 | 371.3156 | 78  | 100  | Hexanedioic acid, bis(2-ethylhexyl) ester |
| 118.0873 | 117.079 | -0.001  | 118.0863 | 289 | 85.4 | Betaine                                   |
| 118.0873 | 117.079 | -0.001  | 118.0863 | 288 | 85.4 | Betaine                                   |
| 118.0873 | 117.079 | -0.001  | 118.0863 | 285 | 85.4 | Betaine                                   |
| 118.0873 | 117.079 | -0.001  | 118.0863 | 365 | 31.2 | Betaine                                   |
| 118.0873 | 117.079 | -0.001  | 118.0863 | 364 | 31.2 | Betaine                                   |
| 118.0873 | 117.079 | -0.001  | 118.0863 | 360 | 31.2 | Betaine                                   |
| 118.0873 | 117.079 | -0.001  | 118.0863 | 363 | 75.6 | Betaine                                   |
| 118.0873 | 117.079 | -0.001  | 118.0863 | 346 | 75.6 | Betaine                                   |
| 118.0873 | 117.079 | -0.001  | 118.0863 | 326 | 75.6 | Betaine                                   |
| 118.0873 | 117.079 | -0.001  | 118.0863 | 330 | 83   | Betaine                                   |
| 118.0873 | 117.079 | -0.001  | 118.0863 | 327 | 83   | Betaine                                   |
| 118.0873 | 117.079 | -0.001  | 118.0863 | 321 | 83   | Betaine                                   |
| 118.0873 | 117.079 | -0.001  | 118.0863 | 333 | 69.8 | Betaine                                   |
| 118.0873 | 117.079 | -0.001  | 118.0863 | 330 | 69.8 | Betaine                                   |
| 118.0873 | 117.079 | -0.001  | 118.0863 | 321 | 69.8 | Betaine                                   |
| 118.0873 | 117.079 | -0.001  | 118.0863 | 355 | 60.2 | Betaine                                   |
| 118.0873 | 117.079 | -0.001  | 118.0863 | 350 | 60.2 | Betaine                                   |
| 118.0873 | 117.079 | -0.001  | 118.0863 | 349 | 60.2 | Betaine                                   |
| 118.0873 | 117.079 | -0.001  | 118.0863 | 307 | 76.1 | Betaine                                   |
| 118.0873 | 117.079 | -0.001  | 118.0863 | 302 | 76.1 | Betaine                                   |
| 118.0873 | 117.079 | -0.001  | 118.0863 | 301 | 76.1 | Betaine                                   |
| 118.0873 | 117.079 | -0.001  | 118.0863 | 363 | 55.9 | Betaine                                   |
| 118.0873 | 117.079 | -0.001  | 118.0863 | 362 | 55.9 | Betaine                                   |
| 118.0873 | 117.079 | -0.001  | 118.0863 | 358 | 55.9 | Betaine                                   |
| 97.0774  | 114.104 | 0.0238  | 97.1012  | 51  | 20   | Cyclohexanol, 1-methyl-                   |
| 97.0774  | 114.104 | 0.0238  | 97.1012  | 48  | 17.6 | Cyclohexanol, 2-methyl-, trans-           |
| 97.0774  | 114.104 | 0.0238  | 97.1012  | 48  | 17.6 | Cyclohexanol, 4-methyl-, trans-           |
| 371.3164 | 370.308 | -0.0009 | 371.3156 | 170 | 100  | Hexanedioic acid, bis(2-ethylhexyl)       |
| 371.3164 | 370.308 | -0.0009 | 371.3156 | 105 | 100  | Hexanedioic acid, bis(2-ethylhexyl)       |
| 371.3164 | 370.308 | -0.0009 | 371.3156 | 99  | 100  | Hexanedioic acid, bis(2-ethylhexyl) ester |
| 371.3164 | 370.308 | -0.0009 | 371.3156 | 150 | 100  | Hexanedioic acid, bis(2-ethylhexyl) ester |
| 371.3164 | 370.308 | -0.0009 | 371.3156 | 134 | 100  | Hexanedioic acid, bis(2-ethylhexyl) ester |
| 371.3164 | 370.308 | -0.0009 | 371.3156 | 110 | 100  | Hexanedioic acid, bis(2-ethylhexyl) ester |
| 371.3164 | 370.308 | -0.0009 | 371.3156 | 44  | 100  | Hexanedioic acid, bis(2-ethylhexyl) ester |
| 371.3164 | 370.308 | -0.0009 | 371.3156 | 19  | 100  | Hexanedioic acid, bis(2-ethylhexyl) ester |

|          |         |         |          |     |      |                                           |
|----------|---------|---------|----------|-----|------|-------------------------------------------|
| 371.3164 | 370.308 | -0.0009 | 371.3156 | 115 | 100  | Hexanedioic acid, bis(2-ethylhexyl) ester |
| 371.3164 | 370.308 | -0.0009 | 371.3156 | 93  | 100  | Hexanedioic acid, bis(2-ethylhexyl) ester |
| 371.3164 | 370.308 | -0.0009 | 371.3156 | 66  | 100  | Hexanedioic acid, bis(2-ethylhexyl) ester |
| 186.0588 | 163.084 | 0.0149  | 186.0737 | 98  | 57.3 | N,N-Bis(2-hydroxyethyl)glycine            |
| 186.0588 | 203.091 | 0.0285  | 186.0873 | 90  | 42.7 | Ala-Asn                                   |
| 186.0588 | 163.084 | 0.0149  | 186.0737 | 49  | 57.3 | N,N-Bis(2-hydroxyethyl)glycine            |
| 186.0588 | 203.091 | 0.0285  | 186.0873 | 49  | 68.7 | Ala-Asn                                   |
| 186.0588 | 163.084 | 0.0149  | 186.0737 | 29  | 31.3 | N,N-Bis(2-hydroxyethyl)glycine            |
| 186.0588 | 370.196 | 0.0467  | 186.1055 | 32  | 100  | Ser-His-Lys                               |
| 118.0873 | 117.079 | -0.001  | 118.0863 | 267 | 55.2 | Betaine                                   |
| 118.0873 | 117.079 | -0.001  | 118.0863 | 267 | 55.2 | Betaine                                   |
| 118.0873 | 117.079 | -0.001  | 118.0863 | 265 | 55.2 | Betaine                                   |
| 118.0873 | 117.079 | -0.001  | 118.0863 | 394 | 63.6 | Betaine                                   |
| 118.0873 | 117.079 | -0.001  | 118.0863 | 392 | 63.6 | Betaine                                   |
| 118.0873 | 117.079 | -0.001  | 118.0863 | 380 | 63.6 | Betaine                                   |
| 118.0873 | 117.079 | -0.001  | 118.0863 | 275 | 60.1 | Betaine                                   |
| 118.0873 | 117.079 | -0.001  | 118.0863 | 271 | 60.1 | Betaine                                   |
| 118.0873 | 117.079 | -0.001  | 118.0863 | 269 | 60.1 | Betaine                                   |
| 118.0873 | 117.079 | -0.001  | 118.0863 | 352 | 47   | Betaine                                   |
| 118.0873 | 117.079 | -0.001  | 118.0863 | 352 | 47   | Betaine                                   |
| 118.0873 | 117.079 | -0.001  | 118.0863 | 348 | 47   | Betaine                                   |
| 186.0588 | 163.084 | 0.0149  | 186.0737 | 118 | 69.9 | N,N-Bis(2-hydroxyethyl)glycine            |
| 186.0588 | 203.091 | 0.0285  | 186.0873 | 96  | 27.6 | Ala-Asn                                   |
| 186.0588 | 163.084 | 0.0149  | 186.0737 | 29  | 69.9 | N,N-Bis(2-hydroxyethyl)glycine            |
| 186.0588 | 163.084 | 0.0149  | 186.0737 | 146 | 100  | N,N-Bis(2-hydroxyethyl)glycine            |
| 106.0872 | 105.079 | -0.0009 | 106.0863 | 121 | 100  | Diethanolamine                            |
| 224.1293 | 223.106 | -0.0164 | 224.1129 | 133 | 100  | N-Acetyl-D-galactosaminitol               |
| 224.1293 | 223.106 | -0.0164 | 224.1129 | 132 | 100  | N-Acetyl-D-galactosaminitol               |
| 224.1293 | 223.106 | -0.0164 | 224.1129 | 126 | 100  | N-Acetyl-D-galactosaminitol               |
| 224.1293 | 223.084 | -0.0376 | 224.0917 | 189 | 70.6 | N-Acetyl-L-tyrosine                       |
| 224.1293 | 223.084 | -0.0376 | 224.0917 | 175 | 70.6 | N-Acetyl-L-tyrosine                       |
| 224.1293 | 446.228 | -0.0081 | 224.1212 | 166 | 25.8 | Tyr-His-Lys                               |
| 224.1293 | 223.084 | -0.0376 | 224.0917 | 284 | 89.6 | N-Acetyl-L-tyrosine                       |
| 224.1293 | 223.084 | -0.0376 | 224.0917 | 266 | 89.6 | N-Acetyl-L-tyrosine                       |
| 224.1293 | 223.084 | -0.0376 | 224.0917 | 241 | 89.6 | N-Acetyl-L-tyrosine                       |
| 224.1293 | 223.084 | -0.0376 | 224.0917 | 263 | 86.8 | N-Acetyl-L-tyrosine                       |
| 224.1293 | 223.084 | -0.0376 | 224.0917 | 250 | 86.8 | N-Acetyl-L-tyrosine                       |
| 224.1293 | 223.084 | -0.0376 | 224.0917 | 221 | 86.8 | N-Acetyl-L-tyrosine                       |
| 118.0873 | 117.079 | -0.001  | 118.0863 | 406 | 71.7 | Betaine                                   |
| 118.0873 | 117.079 | -0.001  | 118.0863 | 405 | 71.7 | Betaine                                   |
| 118.0873 | 117.079 | -0.001  | 118.0863 | 390 | 71.7 | Betaine                                   |
| 118.0873 | 117.079 | -0.001  | 118.0863 | 289 | 56.5 | Betaine                                   |
| 118.0873 | 117.079 | -0.001  | 118.0863 | 288 | 56.5 | Betaine                                   |
| 118.0873 | 117.079 | -0.001  | 118.0863 | 286 | 56.5 | Betaine                                   |

|          |         |         |          |     |      |                                           |
|----------|---------|---------|----------|-----|------|-------------------------------------------|
| 118.0873 | 117.079 | -0.001  | 118.0863 | 377 | 61.8 | Betaine                                   |
| 118.0873 | 117.079 | -0.001  | 118.0863 | 374 | 61.8 | Betaine                                   |
| 118.0873 | 117.079 | -0.001  | 118.0863 | 370 | 61.8 | Betaine                                   |
| 393.2988 | 392.293 | 0.0011  | 393.2999 | 78  | 100  | Chenodeoxycholic acid                     |
| 393.2988 | 392.293 | 0.0011  | 393.2999 | 64  | 100  | Chenodeoxycholic acid                     |
| 371.3164 | 370.308 | -0.0009 | 371.3156 | 207 | 100  | Hexanedioic acid, bis(2-ethylhexyl) ester |
| 371.3164 | 370.308 | -0.0009 | 371.3156 | 130 | 100  | Hexanedioic acid, bis(2-ethylhexyl) ester |
| 371.3164 | 370.308 | -0.0009 | 371.3156 | 117 | 100  | Hexanedioic acid, bis(2-ethylhexyl) ester |
| 371.3164 | 370.308 | -0.0009 | 371.3156 | 174 | 100  | Hexanedioic acid, bis(2-ethylhexyl) ester |
| 371.3164 | 370.308 | -0.0009 | 371.3156 | 126 | 100  | Hexanedioic acid, bis(2-ethylhexyl) ester |
| 371.3164 | 370.308 | -0.0009 | 371.3156 | 112 | 100  | Hexanedioic acid, bis(2-ethylhexyl) ester |
| 371.3164 | 370.308 | -0.0009 | 371.3156 | 66  | 100  | Hexanedioic acid, bis(2-ethylhexyl) ester |
| 371.3164 | 370.308 | -0.0009 | 371.3156 | 62  | 100  | Hexanedioic acid, bis(2-ethylhexyl) ester |
| 371.3164 | 370.308 | -0.0009 | 371.3156 | 56  | 100  | Hexanedioic acid, bis(2-ethylhexyl) ester |
| 371.3164 | 370.308 | -0.0009 | 371.3156 | 117 | 100  | Hexanedioic acid, bis(2-ethylhexyl) ester |
| 371.3164 | 370.308 | -0.0009 | 371.3156 | 95  | 100  | Hexanedioic acid, bis(2-ethylhexyl) ester |
| 371.3164 | 370.308 | -0.0009 | 371.3156 | 68  | 100  | Hexanedioic acid, bis(2-ethylhexyl) ester |
| 118.0873 | 117.079 | -0.001  | 118.0863 | 444 | 60.1 | Betaine                                   |
| 118.0873 | 117.079 | -0.001  | 118.0863 | 443 | 60.1 | Betaine                                   |
| 118.0873 | 117.079 | -0.001  | 118.0863 | 436 | 60.1 | Betaine                                   |
| 118.0873 | 117.079 | -0.001  | 118.0863 | 308 | 69.2 | Betaine                                   |
| 118.0873 | 117.079 | -0.001  | 118.0863 | 307 | 69.2 | Betaine                                   |
| 118.0873 | 117.079 | -0.001  | 118.0863 | 301 | 69.2 | Betaine                                   |
| 118.0873 | 117.079 | -0.001  | 118.0863 | 364 | 41.6 | Betaine                                   |
| 118.0873 | 117.079 | -0.001  | 118.0863 | 362 | 41.6 | Betaine                                   |
| 118.0873 | 117.079 | -0.001  | 118.0863 | 358 | 41.6 | Betaine                                   |
| 371.3164 | 370.308 | -0.0009 | 371.3156 | 215 | 100  | Hexanedioic acid, bis(2-ethylhexyl) ester |
| 371.3164 | 370.308 | -0.0009 | 371.3156 | 108 | 100  | Hexanedioic acid, bis(2-ethylhexyl) ester |
| 371.3164 | 370.308 | -0.0009 | 371.3156 | 97  | 100  | Hexanedioic acid, bis(2-ethylhexyl) ester |
| 371.3164 | 370.308 | -0.0009 | 371.3156 | 183 | 100  | Hexanedioic acid, bis(2-ethylhexyl) ester |

|          |         |         |          |     |      |                                           |
|----------|---------|---------|----------|-----|------|-------------------------------------------|
| 371.3164 | 370.308 | -0.0009 | 371.3156 | 179 | 100  | Hexanedioic acid, bis(2-ethylhexyl) ester |
| 371.3164 | 370.308 | -0.0009 | 371.3156 | 160 | 100  | Hexanedioic acid, bis(2-ethylhexyl) ester |
| 371.3164 | 370.308 | -0.0009 | 371.3156 | 107 | 100  | Hexanedioic acid, bis(2-ethylhexyl) ester |
| 371.3164 | 370.308 | -0.0009 | 371.3156 | 88  | 100  | Hexanedioic acid, bis(2-ethylhexyl) ester |
| 371.3164 | 370.308 | -0.0009 | 371.3156 | 50  | 100  | Hexanedioic acid, bis(2-ethylhexyl) ester |
| 371.3164 | 370.308 | -0.0009 | 371.3156 | 174 | 100  | Hexanedioic acid, bis(2-ethylhexyl) ester |
| 371.3164 | 370.308 | -0.0009 | 371.3156 | 157 | 100  | Hexanedioic acid, bis(2-ethylhexyl) ester |
| 371.3164 | 370.308 | -0.0009 | 371.3156 | 109 | 100  | Hexanedioic acid, bis(2-ethylhexyl) ester |
| 186.0588 | 163.084 | 0.0149  | 186.0737 | 145 | 100  | N,N-Bis(2-hydroxyethyl)glycine            |
| 118.0873 | 117.079 | -0.001  | 118.0863 | 256 | 39   | Betaine                                   |
| 118.0873 | 117.079 | -0.001  | 118.0863 | 254 | 39   | Betaine                                   |
| 118.0873 | 117.079 | -0.001  | 118.0863 | 253 | 39   | Betaine                                   |
| 118.0873 | 117.079 | -0.001  | 118.0863 | 387 | 31.2 | Betaine                                   |
| 118.0873 | 117.079 | -0.001  | 118.0863 | 386 | 31.2 | Betaine                                   |
| 118.0873 | 117.079 | -0.001  | 118.0863 | 385 | 31.2 | Betaine                                   |
| 118.0873 | 117.079 | -0.001  | 118.0863 | 251 | 65   | Betaine                                   |
| 118.0873 | 117.079 | -0.001  | 118.0863 | 250 | 65   | Betaine                                   |
| 118.0873 | 117.079 | -0.001  | 118.0863 | 245 | 65   | Betaine                                   |
| 118.0873 | 117.079 | -0.001  | 118.0863 | 242 | 66.5 | Betaine                                   |
| 118.0873 | 117.079 | -0.001  | 118.0863 | 240 | 66.5 | Betaine                                   |
| 118.0873 | 117.079 | -0.001  | 118.0863 | 235 | 66.5 | Betaine                                   |
| 393.2988 | 392.293 | 0.0011  | 393.2999 | 45  | 100  | Chenodeoxycholic acid                     |
| 393.2988 | 392.293 | 0.0011  | 393.2999 | 44  | 100  | Chenodeoxycholic acid                     |
| 393.2988 | 392.293 | 0.0011  | 393.2999 | 40  | 100  | Chenodeoxycholic acid                     |
| 393.2988 | 392.293 | 0.0011  | 393.2999 | 37  | 100  | Chenodeoxycholic acid                     |
| 393.2988 | 392.293 | 0.0011  | 393.2999 | 31  | 100  | Chenodeoxycholic acid                     |
| 393.2988 | 392.293 | 0.0011  | 393.2999 | 30  | 100  | Chenodeoxycholic acid                     |
| 371.3164 | 370.308 | -0.0009 | 371.3156 | 231 | 100  | Hexanedioic acid, bis(2-ethylhexyl) ester |
| 371.3164 | 370.308 | -0.0009 | 371.3156 | 127 | 100  | Hexanedioic acid, bis(2-ethylhexyl) ester |
| 371.3164 | 370.308 | -0.0009 | 371.3156 | 123 | 100  | Hexanedioic acid, bis(2-ethylhexyl) ester |
| 371.3164 | 370.308 | -0.0009 | 371.3156 | 173 | 100  | Hexanedioic acid, bis(2-ethylhexyl) ester |
| 371.3164 | 370.308 | -0.0009 | 371.3156 | 170 | 100  | Hexanedioic acid, bis(2-ethylhexyl) ester |
| 371.3164 | 370.308 | -0.0009 | 371.3156 | 151 | 100  | Hexanedioic acid, bis(2-ethylhexyl) ester |



|          |         |         |          |     |      |                                           |
|----------|---------|---------|----------|-----|------|-------------------------------------------|
| 371.3164 | 370.308 | -0.0009 | 371.3156 | 104 | 100  | Hexanedioic acid, bis(2-ethylhexyl) ester |
| 371.3164 | 370.308 | -0.0009 | 371.3156 | 85  | 100  | Hexanedioic acid, bis(2-ethylhexyl) ester |
| 371.3164 | 370.308 | -0.0009 | 371.3156 | 51  | 100  | Hexanedioic acid, bis(2-ethylhexyl) ester |
| 371.3164 | 370.308 | -0.0009 | 371.3156 | 131 | 100  | Hexanedioic acid, bis(2-ethylhexyl) ester |
| 371.3164 | 370.308 | -0.0009 | 371.3156 | 109 | 100  | Hexanedioic acid, bis(2-ethylhexyl) ester |
| 371.3164 | 370.308 | -0.0009 | 371.3156 | 74  | 100  | Hexanedioic acid, bis(2-ethylhexyl) ester |
| 186.0588 | 163.084 | 0.0149  | 186.0737 | 145 | 100  | N,N-Bis(2-hydroxyethyl)glycine            |
| 106.0872 | 105     | 0       | 106.09   | 166 | 72.9 | Diethanolamine                            |
| 106.0872 | 105.079 | -0.0009 | 106.0863 | 125 | 16.6 | Diethanolamine                            |
| 106.0872 | 105.079 | -0.0009 | 106.0863 | 124 | 16.6 | Diethanolamine                            |
| 106.0872 | 105     | 0       | 106.09   | 161 | 81.4 | Diethanolamine                            |
| 106.0872 | 105.079 | -0.0009 | 106.0863 | 120 | 18.6 | Diethanolamine                            |
| 106.0872 | 105.079 | -0.0009 | 106.0863 | 120 | 18.6 | Diethanolamine                            |
| 118.0873 | 117.079 | -0.001  | 118.0863 | 330 | 53.7 | Betaine                                   |
| 118.0873 | 117.079 | -0.001  | 118.0863 | 330 | 53.7 | Betaine                                   |
| 118.0873 | 117.079 | -0.001  | 118.0863 | 329 | 53.7 | Betaine                                   |
| 118.0873 | 117.079 | -0.001  | 118.0863 | 431 | 43.4 | Betaine                                   |
| 118.0873 | 117.079 | -0.001  | 118.0863 | 422 | 43.4 | Betaine                                   |
| 118.0873 | 117     | 0       | 118.09   | 421 | 30.7 | Betaine                                   |
| 118.0873 | 117.079 | -0.001  | 118.0863 | 266 | 64.7 | Betaine                                   |
| 118.0873 | 117.079 | -0.001  | 118.0863 | 264 | 64.7 | Betaine                                   |
| 118.0873 | 117.079 | -0.001  | 118.0863 | 260 | 64.7 | Betaine                                   |
| 118.0873 | 117.079 | -0.001  | 118.0863 | 300 | 70.3 | Betaine                                   |
| 118.0873 | 117.079 | -0.001  | 118.0863 | 297 | 70.3 | Betaine                                   |
| 118.0873 | 117.079 | -0.001  | 118.0863 | 297 | 70.3 | Betaine                                   |
| 371.3164 | 370.308 | -0.0009 | 371.3156 | 219 | 100  | Hexanedioic acid, bis(2-ethylhexyl) ester |
| 371.3164 | 370.308 | -0.0009 | 371.3156 | 146 | 100  | Hexanedioic acid, bis(2-ethylhexyl) ester |
| 371.3164 | 370.308 | -0.0009 | 371.3156 | 142 | 100  | Hexanedioic acid, bis(2-ethylhexyl) ester |
| 371.3164 | 370.308 | -0.0009 | 371.3156 | 136 | 100  | Hexanedioic acid, bis(2-ethylhexyl) ester |
| 371.3164 | 370.308 | -0.0009 | 371.3156 | 126 | 100  | Hexanedioic acid, bis(2-ethylhexyl) ester |
| 371.3164 | 370.308 | -0.0009 | 371.3156 | 112 | 100  | Hexanedioic acid, bis(2-ethylhexyl) ester |
| 371.3164 | 370.308 | -0.0009 | 371.3156 | 138 | 100  | Hexanedioic acid, bis(2-ethylhexyl) ester |
| 371.3164 | 370.308 | -0.0009 | 371.3156 | 115 | 100  | Hexanedioic acid, bis(2-ethylhexyl) ester |

|          |         |         |          |     |      |                                           |
|----------|---------|---------|----------|-----|------|-------------------------------------------|
| 371.3164 | 370.308 | -0.0009 | 371.3156 | 79  | 100  | Hexanedioic acid, bis(2-ethylhexyl) ester |
| 371.3164 | 370.308 | -0.0009 | 371.3156 | 123 | 100  | Hexanedioic acid, bis(2-ethylhexyl) ester |
| 371.3164 | 370.308 | -0.0009 | 371.3156 | 100 | 100  | Hexanedioic acid, bis(2-ethylhexyl) ester |
| 371.3164 | 370.308 | -0.0009 | 371.3156 | 74  | 100  | Hexanedioic acid, bis(2-ethylhexyl) ester |
| 140.0692 | 139.063 | 0.0014  | 140.0706 | 114 | 68.2 | 5-Amino-2-methoxyphenol                   |
| 140.0692 | 139.063 | 0.0014  | 140.0706 | 95  | 68.2 | 5-Amino-2-methoxyphenol                   |
| 140.0692 | 139.063 | 0.0014  | 140.0706 | 85  | 68.2 | 5-Amino-2-methoxyphenol                   |
| 118.0873 | 117.079 | -0.001  | 118.0863 | 414 | 48.2 | Betaine                                   |
| 118.0873 | 117.079 | -0.001  | 118.0863 | 409 | 48.2 | Betaine                                   |
| 118.0873 | 117.079 | -0.001  | 118.0863 | 404 | 48.2 | Betaine                                   |
| 118.0873 | 117.079 | -0.001  | 118.0863 | 289 | 63.9 | Betaine                                   |
| 118.0873 | 117.079 | -0.001  | 118.0863 | 288 | 63.9 | Betaine                                   |
| 118.0873 | 117.079 | -0.001  | 118.0863 | 284 | 63.9 | Betaine                                   |
| 118.0873 | 117.079 | -0.001  | 118.0863 | 328 | 63   | Betaine                                   |
| 118.0873 | 117.079 | -0.001  | 118.0863 | 326 | 63   | Betaine                                   |
| 118.0873 | 117.079 | -0.001  | 118.0863 | 326 | 63   | Betaine                                   |
| 371.3164 | 370.308 | -0.0009 | 371.3156 | 243 | 100  | Hexanedioic acid, bis(2-ethylhexyl) ester |
| 371.3164 | 370.308 | -0.0009 | 371.3156 | 144 | 100  | Hexanedioic acid, bis(2-ethylhexyl) ester |
| 371.3164 | 370.308 | -0.0009 | 371.3156 | 140 | 100  | Hexanedioic acid, bis(2-ethylhexyl) ester |
| 371.3164 | 370.308 | -0.0009 | 371.3156 | 177 | 100  | Hexanedioic acid, bis(2-ethylhexyl) ester |
| 371.3164 | 370.308 | -0.0009 | 371.3156 | 154 | 100  | Hexanedioic acid, bis(2-ethylhexyl) ester |
| 371.3164 | 370.308 | -0.0009 | 371.3156 | 148 | 100  | Hexanedioic acid, bis(2-ethylhexyl) ester |
| 371.3164 | 370.308 | -0.0009 | 371.3156 | 85  | 100  | Hexanedioic acid, bis(2-ethylhexyl) ester |
| 371.3164 | 370.308 | -0.0009 | 371.3156 | 70  | 100  | Hexanedioic acid, bis(2-ethylhexyl) ester |
| 371.3164 | 370.308 | -0.0009 | 371.3156 | 59  | 100  | Hexanedioic acid, bis(2-ethylhexyl) ester |
| 371.3164 | 370.308 | -0.0009 | 371.3156 | 105 | 100  | Hexanedioic acid, bis(2-ethylhexyl) ester |
| 371.3164 | 370.308 | -0.0009 | 371.3156 | 85  | 100  | Hexanedioic acid, bis(2-ethylhexyl) ester |
| 371.3164 | 370.308 | -0.0009 | 371.3156 | 82  | 100  | Hexanedioic acid, bis(2-ethylhexyl) ester |
| 140.0692 | 139.063 | 0.0014  | 140.0706 | 129 | 100  | 5-Amino-2-methoxyphenol                   |
| 118.0873 | 117.079 | -0.001  | 118.0863 | 202 | 100  | Betaine                                   |
| 118.0873 | 117.079 | -0.001  | 118.0863 | 199 | 100  | Betaine                                   |

|          |         |         |          |     |      |                                           |
|----------|---------|---------|----------|-----|------|-------------------------------------------|
| 118.0873 | 117.079 | -0.001  | 118.0863 | 191 | 100  | Betaine                                   |
| 118.0873 | 117.079 | -0.001  | 118.0863 | 397 | 32.7 | Betaine                                   |
| 118.0873 | 117.079 | -0.001  | 118.0863 | 396 | 32.7 | Betaine                                   |
| 118.0873 | 117.079 | -0.001  | 118.0863 | 394 | 32.7 | Betaine                                   |
| 118.0873 | 117.079 | -0.001  | 118.0863 | 347 | 98.4 | Betaine                                   |
| 118.0873 | 117.079 | -0.001  | 118.0863 | 345 | 98.4 | Betaine                                   |
| 118.0873 | 117.079 | -0.001  | 118.0863 | 339 | 98.4 | Betaine                                   |
| 118.0873 | 117     | 0       | 118.09   | 347 | 25.5 | Betaine                                   |
| 118.0873 | 117.079 | -0.001  | 118.0863 | 346 | 24.5 | Betaine                                   |
| 118.0873 | 117.079 | -0.001  | 118.0863 | 345 | 24.5 | Betaine                                   |
| 371.3164 | 370.308 | -0.0009 | 371.3156 | 243 | 100  | Hexanedioic acid, bis(2-ethylhexyl) ester |
| 371.3164 | 370.308 | -0.0009 | 371.3156 | 140 | 100  | Hexanedioic acid, bis(2-ethylhexyl) ester |
| 371.3164 | 370.308 | -0.0009 | 371.3156 | 133 | 100  | Hexanedioic acid, bis(2-ethylhexyl) ester |
| 371.3164 | 370.308 | -0.0009 | 371.3156 | 144 | 100  | Hexanedioic acid, bis(2-ethylhexyl) ester |
| 371.3164 | 370.308 | -0.0009 | 371.3156 | 133 | 100  | Hexanedioic acid, bis(2-ethylhexyl) ester |
| 371.3164 | 370.308 | -0.0009 | 371.3156 | 124 | 100  | Hexanedioic acid, bis(2-ethylhexyl) ester |
| 371.3164 | 370.308 | -0.0009 | 371.3156 | 109 | 100  | Hexanedioic acid, bis(2-ethylhexyl) ester |
| 371.3164 | 370.308 | -0.0009 | 371.3156 | 41  | 100  | Hexanedioic acid, bis(2-ethylhexyl) ester |
| 371.3164 | 370.308 | -0.0009 | 371.3156 | 33  | 100  | Hexanedioic acid, bis(2-ethylhexyl) ester |
| 371.3164 | 370.308 | -0.0009 | 371.3156 | 97  | 100  | Hexanedioic acid, bis(2-ethylhexyl) ester |
| 371.3164 | 370.308 | -0.0009 | 371.3156 | 80  | 100  | Hexanedioic acid, bis(2-ethylhexyl) ester |
| 371.3164 | 370.308 | -0.0009 | 371.3156 | 51  | 100  | Hexanedioic acid, bis(2-ethylhexyl) ester |
| 97.0774  | 114.104 | 0.0238  | 97.1012  | 13  | 23.7 | Cyclopentanemethanol, .alpha.-methyl-     |
| 97.0774  | 114.104 | 0.0238  | 97.1012  | 10  | 23.7 | Cyclopentanemethanol, .alpha.-methyl-     |
| 97.0774  | 114.104 | 0.0238  | 97.1012  | 10  | 20.9 | Cyclohexanol, 2-methyl-, trans-           |
| 118.0873 | 117.079 | -0.001  | 118.0863 | 229 | 100  | Betaine                                   |
| 118.0873 | 117.079 | -0.001  | 118.0863 | 4   | 100  | Betaine                                   |
| 118.0873 | 117.079 | -0.001  | 118.0863 | 2   | 100  | Betaine                                   |
| 118.0873 | 117.079 | -0.001  | 118.0863 | 445 | 60.5 | Betaine                                   |
| 118.0873 | 117.079 | -0.001  | 118.0863 | 443 | 60.5 | Betaine                                   |
| 118.0873 | 117.079 | -0.001  | 118.0863 | 441 | 60.5 | Betaine                                   |
| 118.0873 | 117.079 | -0.001  | 118.0863 | 327 | 53.6 | Betaine                                   |
| 118.0873 | 117.079 | -0.001  | 118.0863 | 325 | 53.6 | Betaine                                   |

|          |         |         |          |     |      |                                           |
|----------|---------|---------|----------|-----|------|-------------------------------------------|
| 118.0873 | 117.079 | -0.001  | 118.0863 | 325 | 53.6 | Betaine                                   |
| 118.0873 | 117.079 | -0.001  | 118.0863 | 327 | 64   | Betaine                                   |
| 118.0873 | 117.079 | -0.001  | 118.0863 | 326 | 64   | Betaine                                   |
| 118.0873 | 117.079 | -0.001  | 118.0863 | 324 | 64   | Betaine                                   |
| 186.0588 | 370.196 | 0.0467  | 186.1055 | 69  | 100  | Ser-His-Lys                               |
| 106.0872 | 105     | 0       | 106.09   | 189 | 80.2 | Diethanolamine                            |
| 106.0872 | 105.079 | -0.0009 | 106.0863 | 153 | 19.8 | Diethanolamine                            |
| 106.0872 | 105.079 | -0.0009 | 106.0863 | 153 | 19.8 | Diethanolamine                            |
| 118.0873 | 117.079 | -0.001  | 118.0863 | 413 | 51.3 | Betaine                                   |
| 118.0873 | 117.079 | -0.001  | 118.0863 | 411 | 51.3 | Betaine                                   |
| 118.0873 | 117.079 | -0.001  | 118.0863 | 408 | 51.3 | Betaine                                   |
| 118.0873 | 117.079 | -0.001  | 118.0863 | 298 | 95.5 | Betaine                                   |
| 118.0873 | 117.079 | -0.001  | 118.0863 | 296 | 95.5 | Betaine                                   |
| 118.0873 | 117.079 | -0.001  | 118.0863 | 286 | 95.5 | Betaine                                   |
| 118.0873 | 117.079 | -0.001  | 118.0863 | 379 | 98.2 | Betaine                                   |
| 118.0873 | 117.079 | -0.001  | 118.0863 | 379 | 98.2 | Betaine                                   |
| 118.0873 | 117.079 | -0.001  | 118.0863 | 373 | 98.2 | Betaine                                   |
| 371.3164 | 370.308 | -0.0009 | 371.3156 | 226 | 100  | Hexanedioic acid, bis(2-ethylhexyl) ester |
| 371.3164 | 370.308 | -0.0009 | 371.3156 | 136 | 100  | Hexanedioic acid, bis(2-ethylhexyl) ester |
| 371.3164 | 370.308 | -0.0009 | 371.3156 | 129 | 100  | Hexanedioic acid, bis(2-ethylhexyl) ester |
| 371.3164 | 370.308 | -0.0009 | 371.3156 | 188 | 100  | Hexanedioic acid, bis(2-ethylhexyl) ester |
| 371.3164 | 370.308 | -0.0009 | 371.3156 | 172 | 100  | Hexanedioic acid, bis(2-ethylhexyl) ester |
| 371.3164 | 370.308 | -0.0009 | 371.3156 | 167 | 100  | Hexanedioic acid, bis(2-ethylhexyl) ester |
| 371.3164 | 370.308 | -0.0009 | 371.3156 | 106 | 100  | Hexanedioic acid, bis(2-ethylhexyl) ester |
| 371.3164 | 370.308 | -0.0009 | 371.3156 | 51  | 100  | Hexanedioic acid, bis(2-ethylhexyl) ester |
| 371.3164 | 370.308 | -0.0009 | 371.3156 | 45  | 100  | Hexanedioic acid, bis(2-ethylhexyl) ester |
| 371.3164 | 370.308 | -0.0009 | 371.3156 | 152 | 100  | Hexanedioic acid, bis(2-ethylhexyl) ester |
| 371.3164 | 370.308 | -0.0009 | 371.3156 | 132 | 100  | Hexanedioic acid, bis(2-ethylhexyl) ester |
| 371.3164 | 370.308 | -0.0009 | 371.3156 | 99  | 100  | Hexanedioic acid, bis(2-ethylhexyl) ester |
| 106.0872 | 105     | 0       | 106.09   | 156 | 79.3 | Diethanolamine                            |
| 106.0872 | 105.079 | -0.0009 | 106.0863 | 123 | 20.7 | Diethanolamine                            |
| 106.0872 | 105.079 | -0.0009 | 106.0863 | 122 | 20.7 | Diethanolamine                            |
| 106.0872 | 105.079 | -0.0009 | 106.0863 | 154 | 100  | Diethanolamine                            |
| 106.0872 | 105.079 | -0.0009 | 106.0863 | 153 | 100  | Diethanolamine                            |
| 106.0872 | 105.079 | -0.0009 | 106.0863 | 152 | 100  | Diethanolamine                            |

|          |         |         |          |     |      |                                           |
|----------|---------|---------|----------|-----|------|-------------------------------------------|
| 106.0872 | 105     | 0       | 106.09   | 225 | 53.4 | Diethanolamine                            |
| 106.0872 | 105.079 | -0.0009 | 106.0863 | 218 | 40.9 | Diethanolamine                            |
| 106.0872 | 105.079 | -0.0009 | 106.0863 | 216 | 40.9 | Diethanolamine                            |
| 118.0873 | 117.079 | -0.001  | 118.0863 | 284 | 63.4 | Betaine                                   |
| 118.0873 | 117.079 | -0.001  | 118.0863 | 283 | 63.4 | Betaine                                   |
| 118.0873 | 117.079 | -0.001  | 118.0863 | 278 | 63.4 | Betaine                                   |
| 118.0873 | 117.079 | -0.001  | 118.0863 | 285 | 64.5 | Betaine                                   |
| 118.0873 | 117.079 | -0.001  | 118.0863 | 284 | 64.5 | Betaine                                   |
| 118.0873 | 117.079 | -0.001  | 118.0863 | 282 | 64.5 | Betaine                                   |
| 118.0873 | 117     | 0       | 118.09   | 352 | 25.9 | Betaine                                   |
| 118.0873 | 117     | 0       | 118.09   | 350 | 23.9 | Betaine                                   |
| 118.0873 | 117.079 | -0.001  | 118.0863 | 341 | 17.3 | Betaine                                   |
| 371.3164 | 370.308 | -0.0009 | 371.3156 | 196 | 100  | Hexanedioic acid, bis(2-ethylhexyl) ester |
| 371.3164 | 370.308 | -0.0009 | 371.3156 | 115 | 100  | Hexanedioic acid, bis(2-ethylhexyl) ester |
| 371.3164 | 370.308 | -0.0009 | 371.3156 | 106 | 100  | Hexanedioic acid, bis(2-ethylhexyl) ester |
| 371.3164 | 370.308 | -0.0009 | 371.3156 | 155 | 100  | Hexanedioic acid, bis(2-ethylhexyl) ester |
| 371.3164 | 370.308 | -0.0009 | 371.3156 | 121 | 100  | Hexanedioic acid, bis(2-ethylhexyl) ester |
| 371.3164 | 370.308 | -0.0009 | 371.3156 | 107 | 100  | Hexanedioic acid, bis(2-ethylhexyl) ester |
| 371.3164 | 370.308 | -0.0009 | 371.3156 | 141 | 100  | Hexanedioic acid, bis(2-ethylhexyl) ester |
| 371.3164 | 370.308 | -0.0009 | 371.3156 | 115 | 100  | Hexanedioic acid, bis(2-ethylhexyl) ester |
| 371.3164 | 370.308 | -0.0009 | 371.3156 | 88  | 100  | Hexanedioic acid, bis(2-ethylhexyl) ester |
| 371.3164 | 370.308 | -0.0009 | 371.3156 | 145 | 100  | Hexanedioic acid, bis(2-ethylhexyl) ester |
| 371.3164 | 370.308 | -0.0009 | 371.3156 | 119 | 100  | Hexanedioic acid, bis(2-ethylhexyl) ester |
| 371.3164 | 370.308 | -0.0009 | 371.3156 | 72  | 100  | Hexanedioic acid, bis(2-ethylhexyl) ester |
| 106.0872 | 105     | 0       | 106.09   | 247 | 75.4 | Diethanolamine                            |
| 106.0872 | 105.079 | -0.0009 | 106.0863 | 221 | 22.6 | Diethanolamine                            |
| 106.0872 | 105.079 | -0.0009 | 106.0863 | 220 | 22.6 | Diethanolamine                            |
| 106.0872 | 105     | 0       | 106.09   | 196 | 79.6 | Diethanolamine                            |
| 106.0872 | 105.079 | -0.0009 | 106.0863 | 162 | 20.4 | Diethanolamine                            |
| 106.0872 | 105.079 | -0.0009 | 106.0863 | 161 | 20.4 | Diethanolamine                            |
| 393.2988 | 392.293 | 0.0011  | 393.2999 | 42  | 100  | Chenodeoxycholic acid                     |
| 393.2988 | 392.293 | 0.0011  | 393.2999 | 39  | 100  | Chenodeoxycholic acid                     |
| 393.2988 | 392.293 | 0.0011  | 393.2999 | 37  | 100  | Chenodeoxycholic acid                     |
| 371.3164 | 370.308 | -0.0009 | 371.3156 | 239 | 100  | Hexanedioic acid, bis(2-ethylhexyl) ester |

|          |         |         |          |     |      |                                           |
|----------|---------|---------|----------|-----|------|-------------------------------------------|
| 371.3164 | 370.308 | -0.0009 | 371.3156 | 119 | 100  | Hexanedioic acid, bis(2-ethylhexyl) ester |
| 371.3164 | 370.308 | -0.0009 | 371.3156 | 118 | 100  | Hexanedioic acid, bis(2-ethylhexyl) ester |
| 371.3164 | 370.308 | -0.0009 | 371.3156 | 132 | 100  | Hexanedioic acid, bis(2-ethylhexyl) ester |
| 371.3164 | 370.308 | -0.0009 | 371.3156 | 108 | 100  | Hexanedioic acid, bis(2-ethylhexyl) ester |
| 371.3164 | 370.308 | -0.0009 | 371.3156 | 96  | 100  | Hexanedioic acid, bis(2-ethylhexyl) ester |
| 371.3164 | 370.308 | -0.0009 | 371.3156 | 106 | 100  | Hexanedioic acid, bis(2-ethylhexyl) ester |
| 371.3164 | 370.308 | -0.0009 | 371.3156 | 61  | 100  | Hexanedioic acid, bis(2-ethylhexyl) ester |
| 371.3164 | 370.308 | -0.0009 | 371.3156 | 40  | 100  | Hexanedioic acid, bis(2-ethylhexyl) ester |
| 371.3164 | 370.308 | -0.0009 | 371.3156 | 149 | 100  | Hexanedioic acid, bis(2-ethylhexyl) ester |
| 371.3164 | 370.308 | -0.0009 | 371.3156 | 128 | 100  | Hexanedioic acid, bis(2-ethylhexyl) ester |
| 371.3164 | 370.308 | -0.0009 | 371.3156 | 82  | 100  | Hexanedioic acid, bis(2-ethylhexyl) ester |
| 186.0588 | 370.196 | 0.0467  | 186.1055 | 58  | 100  | Ser-His-Lys                               |
| 186.0588 | 163.084 | 0.0149  | 186.0737 | 154 | 100  | N,N-Bis(2-hydroxyethyl)glycine            |
| 391.2862 | 390.277 | -0.0019 | 391.2843 | 322 | 96.9 | Diethyl phthalate                         |
| 391.2862 | 390.277 | -0.0019 | 391.2843 | 312 | 96.9 | Diethyl phthalate                         |
| 391.2862 | 390.277 | -0.0019 | 391.2843 | 306 | 96.9 | Diethyl phthalate                         |
| 391.2862 | 390.277 | -0.0019 | 391.2843 | 230 | 55.9 | Diethyl phthalate                         |
| 391.2862 | 390.277 | -0.0019 | 391.2843 | 223 | 55.9 | Diethyl phthalate                         |
| 391.2862 | 390.277 | -0.0019 | 391.2843 | 223 | 42.8 | Bis(2-ethylhexyl) phthalate               |
| 391.2862 | 390.277 | -0.0019 | 391.2843 | 251 | 65.5 | Diethyl phthalate                         |
| 391.2862 | 390.277 | -0.0019 | 391.2843 | 241 | 65.5 | Diethyl phthalate                         |
| 391.2862 | 390.277 | -0.0019 | 391.2843 | 238 | 65.5 | Diethyl phthalate                         |
| 391.2862 | 390.277 | -0.0019 | 391.2843 | 229 | 53.6 | Diethyl phthalate                         |
| 391.2862 | 390.277 | -0.0019 | 391.2843 | 225 | 45.3 | Bis(2-ethylhexyl) phthalate               |
| 391.2862 | 390.277 | -0.0019 | 391.2843 | 221 | 53.6 | Diethyl phthalate                         |
| 118.0873 | 117.079 | -0.001  | 118.0863 | 398 | 56.6 | Betaine                                   |
| 118.0873 | 117.079 | -0.001  | 118.0863 | 397 | 56.6 | Betaine                                   |
| 118.0873 | 117.079 | -0.001  | 118.0863 | 393 | 56.6 | Betaine                                   |
| 118.0873 | 117.079 | -0.001  | 118.0863 | 340 | 83.5 | Betaine                                   |
| 118.0873 | 117.079 | -0.001  | 118.0863 | 334 | 83.5 | Betaine                                   |
| 118.0873 | 117.079 | -0.001  | 118.0863 | 318 | 83.5 | Betaine                                   |
| 118.0873 | 117.079 | -0.001  | 118.0863 | 339 | 42.9 | Betaine                                   |
| 118.0873 | 117.079 | -0.001  | 118.0863 | 333 | 42.9 | Betaine                                   |
| 118.0873 | 117.079 | -0.001  | 118.0863 | 332 | 42.9 | Betaine                                   |
| 371.3164 | 370.308 | -0.0009 | 371.3156 | 203 | 100  | Hexanedioic acid, bis(2-ethylhexyl) ester |

|          |         |         |          |     |      |                                           |
|----------|---------|---------|----------|-----|------|-------------------------------------------|
| 371.3164 | 370.308 | -0.0009 | 371.3156 | 77  | 100  | Hexanedioic acid, bis(2-ethylhexyl) ester |
| 371.3164 | 370.308 | -0.0009 | 371.3156 | 75  | 100  | Hexanedioic acid, bis(2-ethylhexyl) ester |
| 371.3164 | 370.308 | -0.0009 | 371.3156 | 141 | 100  | Hexanedioic acid, bis(2-ethylhexyl) ester |
| 371.3164 | 370.308 | -0.0009 | 371.3156 | 138 | 100  | Hexanedioic acid, bis(2-ethylhexyl) ester |
| 371.3164 | 370.308 | -0.0009 | 371.3156 | 122 | 100  | Hexanedioic acid, bis(2-ethylhexyl) ester |
| 371.3164 | 370.308 | -0.0009 | 371.3156 | 98  | 100  | Hexanedioic acid, bis(2-ethylhexyl) ester |
| 371.3164 | 370.308 | -0.0009 | 371.3156 | 96  | 100  | Hexanedioic acid, bis(2-ethylhexyl) ester |
| 371.3164 | 370.308 | -0.0009 | 371.3156 | 76  | 100  | Hexanedioic acid, bis(2-ethylhexyl) ester |
| 371.3164 | 370.308 | -0.0009 | 371.3156 | 194 | 100  | Hexanedioic acid, bis(2-ethylhexyl) ester |
| 371.3164 | 370.308 | -0.0009 | 371.3156 | 170 | 100  | Hexanedioic acid, bis(2-ethylhexyl) ester |
| 371.3164 | 370.308 | -0.0009 | 371.3156 | 127 | 100  | Hexanedioic acid, bis(2-ethylhexyl) ester |
| 97.0774  | 114.104 | 0.0238  | 97.1012  | 44  | 23.5 | Cyclohexanemethanol                       |
| 97.0774  | 114.104 | 0.0238  | 97.1012  | 42  | 21.6 | Cyclohexanol, 4-methyl-, trans-           |
| 97.0774  | 114.104 | 0.0238  | 97.1012  | 35  | 16.6 | Cyclohexanol, 1-methyl-                   |
| 106.0872 | 105     | 0       | 106.09   | 159 | 74.6 | Diethanolamine                            |
| 106.0872 | 105.079 | -0.0009 | 106.0863 | 126 | 19.5 | Diethanolamine                            |
| 106.0872 | 105.079 | -0.0009 | 106.0863 | 125 | 19.5 | Diethanolamine                            |
| 118.0873 | 117.079 | -0.001  | 118.0863 | 374 | 47.5 | Betaine                                   |
| 118.0873 | 117.079 | -0.001  | 118.0863 | 374 | 47.5 | Betaine                                   |
| 118.0873 | 117.079 | -0.001  | 118.0863 | 372 | 47.5 | Betaine                                   |
| 118.0873 | 117.079 | -0.001  | 118.0863 | 241 | 86.4 | Betaine                                   |
| 118.0873 | 117.079 | -0.001  | 118.0863 | 226 | 86.4 | Betaine                                   |
| 118.0873 | 117.079 | -0.001  | 118.0863 | 223 | 86.4 | Betaine                                   |
| 118.0873 | 117     | 0       | 118.09   | 347 | 22.7 | Betaine                                   |
| 118.0873 | 117     | 0       | 118.09   | 347 | 22.7 | Betaine                                   |
| 118.0873 | 117.079 | -0.001  | 118.0863 | 346 | 21.8 | Betaine                                   |
| 371.3164 | 370.308 | -0.0009 | 371.3156 | 236 | 100  | Hexanedioic acid, bis(2-ethylhexyl) ester |
| 371.3164 | 370.308 | -0.0009 | 371.3156 | 123 | 100  | Hexanedioic acid, bis(2-ethylhexyl) ester |
| 371.3164 | 370.308 | -0.0009 | 371.3156 | 117 | 100  | Hexanedioic acid, bis(2-ethylhexyl) ester |
| 371.3164 | 370.308 | -0.0009 | 371.3156 | 194 | 100  | Hexanedioic acid, bis(2-ethylhexyl) ester |
| 371.3164 | 370.308 | -0.0009 | 371.3156 | 167 | 100  | Hexanedioic acid, bis(2-ethylhexyl) ester |

|          |         |         |          |     |      |                                           |
|----------|---------|---------|----------|-----|------|-------------------------------------------|
| 371.3164 | 370.308 | -0.0009 | 371.3156 | 144 | 100  | Hexanedioic acid, bis(2-ethylhexyl) ester |
| 371.3164 | 370.308 | -0.0009 | 371.3156 | 60  | 100  | Hexanedioic acid, bis(2-ethylhexyl) ester |
| 371.3164 | 370.308 | -0.0009 | 371.3156 | 50  | 100  | Hexanedioic acid, bis(2-ethylhexyl) ester |
| 371.3164 | 370.308 | -0.0009 | 371.3156 | 49  | 100  | Hexanedioic acid, bis(2-ethylhexyl) ester |
| 371.3164 | 370.308 | -0.0009 | 371.3156 | 162 | 100  | Hexanedioic acid, bis(2-ethylhexyl) ester |
| 371.3164 | 370.308 | -0.0009 | 371.3156 | 140 | 100  | Hexanedioic acid, bis(2-ethylhexyl) ester |
| 371.3164 | 370.308 | -0.0009 | 371.3156 | 112 | 100  | Hexanedioic acid, bis(2-ethylhexyl) ester |
| 97.0774  | 114.104 | 0.0238  | 97.1012  | 12  | 53.1 | Cyclohexanol, 2-methyl-, trans-           |
| 97.0774  | 114.104 | 0.0238  | 97.1012  | 10  | 53.1 | Cyclohexanol, 2-methyl-, trans-           |
| 97.0774  | 114.104 | 0.0238  | 97.1012  | 9   | 46.9 | Cyclohexanol, 4-methyl-, trans-           |
| 106.0872 | 105     | 0       | 106.09   | 159 | 75.6 | Diethanolamine                            |
| 106.0872 | 105.079 | -0.0009 | 106.0863 | 122 | 18.4 | Diethanolamine                            |
| 106.0872 | 105.079 | -0.0009 | 106.0863 | 121 | 18.4 | Diethanolamine                            |
| 106.0872 | 105     | 0       | 106.09   | 173 | 81.7 | Diethanolamine                            |
| 106.0872 | 105.079 | -0.0009 | 106.0863 | 131 | 18.3 | Diethanolamine                            |
| 106.0872 | 105.079 | -0.0009 | 106.0863 | 131 | 18.3 | Diethanolamine                            |
| 391.2862 | 390.277 | -0.0019 | 391.2843 | 325 | 97.9 | Diocetyl phthalate                        |
| 391.2862 | 390.277 | -0.0019 | 391.2843 | 324 | 97.9 | Diocetyl phthalate                        |
| 391.2862 | 390.277 | -0.0019 | 391.2843 | 316 | 97.9 | Diocetyl phthalate                        |
| 391.2862 | 390.277 | -0.0019 | 391.2843 | 245 | 95.4 | Diocetyl phthalate                        |
| 391.2862 | 390.277 | -0.0019 | 391.2843 | 193 | 95.4 | Diocetyl phthalate                        |
| 391.2862 | 390.277 | -0.0019 | 391.2843 | 182 | 95.4 | Diocetyl phthalate                        |
| 391.2862 | 390.277 | -0.0019 | 391.2843 | 236 | 52.6 | Diocetyl phthalate                        |
| 391.2862 | 390.277 | -0.0019 | 391.2843 | 233 | 46.5 | Bis(2-ethylhexyl) phthalate               |
| 391.2862 | 390.277 | -0.0019 | 391.2843 | 230 | 52.6 | Diocetyl phthalate                        |
| 391.2862 | 390.277 | -0.0019 | 391.2843 | 190 | 55.2 | Diocetyl phthalate                        |
| 391.2862 | 390.277 | -0.0019 | 391.2843 | 183 | 42.3 | Bis(2-ethylhexyl) phthalate               |
| 391.2862 | 390.277 | -0.0019 | 391.2843 | 182 | 55.2 | Diocetyl phthalate                        |
| 371.3164 | 370.308 | -0.0009 | 371.3156 | 220 | 100  | Hexanedioic acid, bis(2-ethylhexyl) ester |
| 371.3164 | 370.308 | -0.0009 | 371.3156 | 122 | 100  | Hexanedioic acid, bis(2-ethylhexyl) ester |
| 371.3164 | 370.308 | -0.0009 | 371.3156 | 122 | 100  | Hexanedioic acid, bis(2-ethylhexyl) ester |
| 371.3164 | 370.308 | -0.0009 | 371.3156 | 163 | 100  | Hexanedioic acid, bis(2-ethylhexyl) ester |
| 371.3164 | 370.308 | -0.0009 | 371.3156 | 142 | 100  | Hexanedioic acid, bis(2-ethylhexyl) ester |
| 371.3164 | 370.308 | -0.0009 | 371.3156 | 104 | 100  | Hexanedioic acid, bis(2-ethylhexyl) ester |



|          |         |         |          |     |      |                                           |
|----------|---------|---------|----------|-----|------|-------------------------------------------|
| 371.3164 | 370.308 | -0.0009 | 371.3156 | 82  | 100  | Hexanedioic acid, bis(2-ethylhexyl) ester |
| 371.3164 | 370.308 | -0.0009 | 371.3156 | 108 | 100  | Hexanedioic acid, bis(2-ethylhexyl) ester |
| 371.3164 | 370.308 | -0.0009 | 371.3156 | 88  | 100  | Hexanedioic acid, bis(2-ethylhexyl) ester |
| 371.3164 | 370.308 | -0.0009 | 371.3156 | 70  | 100  | Hexanedioic acid, bis(2-ethylhexyl) ester |
| 118.0873 | 117.079 | -0.001  | 118.0863 | 294 | 38.1 | Betaine                                   |
| 118.0873 | 117.079 | -0.001  | 118.0863 | 291 | 38.1 | Betaine                                   |
| 118.0873 | 117.079 | -0.001  | 118.0863 | 289 | 38.1 | Betaine                                   |
| 118.0873 | 117     | 0       | 118.09   | 402 | 30.4 | Betaine                                   |
| 118.0873 | 117.079 | -0.001  | 118.0863 | 395 | 23.3 | Betaine                                   |
| 118.0873 | 117.079 | -0.001  | 118.0863 | 392 | 23.3 | Betaine                                   |
| 118.0873 | 117.079 | -0.001  | 118.0863 | 299 | 67.2 | Betaine                                   |
| 118.0873 | 117.079 | -0.001  | 118.0863 | 298 | 67.2 | Betaine                                   |
| 118.0873 | 117.079 | -0.001  | 118.0863 | 289 | 67.2 | Betaine                                   |
| 118.0873 | 117.079 | -0.001  | 118.0863 | 306 | 65.5 | Betaine                                   |
| 118.0873 | 117.079 | -0.001  | 118.0863 | 304 | 65.5 | Betaine                                   |
| 118.0873 | 117.079 | -0.001  | 118.0863 | 302 | 65.5 | Betaine                                   |
| 106.0872 | 105     | 0       | 106.09   | 157 | 74.4 | Diethanolamine                            |
| 106.0872 | 105.079 | -0.0009 | 106.0863 | 126 | 20.3 | Diethanolamine                            |
| 106.0872 | 105.079 | -0.0009 | 106.0863 | 126 | 20.3 | Diethanolamine                            |
| 391.2862 | 390.277 | -0.0019 | 391.2843 | 371 | 98.8 | Diethyl phthalate                         |
| 391.2862 | 390.277 | -0.0019 | 391.2843 | 346 | 98.8 | Diethyl phthalate                         |
| 391.2862 | 390.277 | -0.0019 | 391.2843 | 338 | 98.8 | Diethyl phthalate                         |
| 391.2862 | 390.277 | -0.0019 | 391.2843 | 244 | 52.5 | Diethyl phthalate                         |
| 391.2862 | 390.277 | -0.0019 | 391.2843 | 241 | 46.4 | Bis(2-ethylhexyl) phthalate               |
| 391.2862 | 390.277 | -0.0019 | 391.2843 | 233 | 52.5 | Diethyl phthalate                         |
| 391.2862 | 390.277 | -0.0019 | 391.2843 | 234 | 52   | Diethyl phthalate                         |
| 391.2862 | 390.277 | -0.0019 | 391.2843 | 231 | 45.9 | Bis(2-ethylhexyl) phthalate               |
| 391.2862 | 390.277 | -0.0019 | 391.2843 | 226 | 52   | Diethyl phthalate                         |
| 391.2862 | 390.277 | -0.0019 | 391.2843 | 202 | 54.8 | Diethyl phthalate                         |
| 391.2862 | 390.277 | -0.0019 | 391.2843 | 197 | 44.2 | Bis(2-ethylhexyl) phthalate               |
| 391.2862 | 390.277 | -0.0019 | 391.2843 | 194 | 54.8 | Diethyl phthalate                         |
| 371.3164 | 370.308 | -0.0009 | 371.3156 | 203 | 100  | Hexanedioic acid, bis(2-ethylhexyl) ester |
| 371.3164 | 370.308 | -0.0009 | 371.3156 | 130 | 100  | Hexanedioic acid, bis(2-ethylhexyl) ester |
| 371.3164 | 370.308 | -0.0009 | 371.3156 | 125 | 100  | Hexanedioic acid, bis(2-ethylhexyl) ester |
| 371.3164 | 370.308 | -0.0009 | 371.3156 | 151 | 100  | Hexanedioic acid, bis(2-ethylhexyl) ester |
| 371.3164 | 370.308 | -0.0009 | 371.3156 | 111 | 100  | Hexanedioic acid, bis(2-ethylhexyl) ester |
| 371.3164 | 370.308 | -0.0009 | 371.3156 | 97  | 100  | Hexanedioic acid, bis(2-ethylhexyl) ester |

|          |         |         |          |     |      |                                           |
|----------|---------|---------|----------|-----|------|-------------------------------------------|
| 371.3164 | 370.308 | -0.0009 | 371.3156 | 102 | 100  | Hexanedioic acid, bis(2-ethylhexyl) ester |
| 371.3164 | 370.308 | -0.0009 | 371.3156 | 83  | 100  | Hexanedioic acid, bis(2-ethylhexyl) ester |
| 371.3164 | 370.308 | -0.0009 | 371.3156 | 70  | 100  | Hexanedioic acid, bis(2-ethylhexyl) ester |
| 371.3164 | 370.308 | -0.0009 | 371.3156 | 140 | 100  | Hexanedioic acid, bis(2-ethylhexyl) ester |
| 371.3164 | 370.308 | -0.0009 | 371.3156 | 115 | 100  | Hexanedioic acid, bis(2-ethylhexyl) ester |
| 371.3164 | 370.308 | -0.0009 | 371.3156 | 67  | 100  | Hexanedioic acid, bis(2-ethylhexyl) ester |
| 118.0873 | 117.079 | -0.001  | 118.0863 | 358 | 62.7 | Betaine                                   |
| 118.0873 | 117.079 | -0.001  | 118.0863 | 354 | 62.7 | Betaine                                   |
| 118.0873 | 117.079 | -0.001  | 118.0863 | 349 | 62.7 | Betaine                                   |
| 118.0873 | 117.079 | -0.001  | 118.0863 | 326 | 59.7 | Betaine                                   |
| 118.0873 | 117.079 | -0.001  | 118.0863 | 323 | 59.7 | Betaine                                   |
| 118.0873 | 117.079 | -0.001  | 118.0863 | 319 | 59.7 | Betaine                                   |
| 118.0873 | 117.079 | -0.001  | 118.0863 | 312 | 64.4 | Betaine                                   |
| 118.0873 | 117.079 | -0.001  | 118.0863 | 312 | 64.4 | Betaine                                   |
| 118.0873 | 117.079 | -0.001  | 118.0863 | 306 | 64.4 | Betaine                                   |
| 391.2862 | 390.277 | -0.0019 | 391.2843 | 347 | 98.5 | Diethyl phthalate                         |
| 391.2862 | 390.277 | -0.0019 | 391.2843 | 338 | 98.5 | Diethyl phthalate                         |
| 391.2862 | 390.277 | -0.0019 | 391.2843 | 323 | 98.5 | Diethyl phthalate                         |
| 391.2862 | 390.277 | -0.0019 | 391.2843 | 221 | 95   | Diethyl phthalate                         |
| 391.2862 | 390.277 | -0.0019 | 391.2843 | 169 | 95   | Diethyl phthalate                         |
| 391.2862 | 390.277 | -0.0019 | 391.2843 | 160 | 95   | Diethyl phthalate                         |
| 391.2862 | 390.277 | -0.0019 | 391.2843 | 196 | 55.1 | Diethyl phthalate                         |
| 391.2862 | 390.277 | -0.0019 | 391.2843 | 190 | 43.3 | Bis(2-ethylhexyl) phthalate               |
| 391.2862 | 390.277 | -0.0019 | 391.2843 | 189 | 55.1 | Diethyl phthalate                         |
| 391.2862 | 390.277 | -0.0019 | 391.2843 | 238 | 53.9 | Diethyl phthalate                         |
| 391.2862 | 390.277 | -0.0019 | 391.2843 | 234 | 45.5 | Bis(2-ethylhexyl) phthalate               |
| 391.2862 | 390.277 | -0.0019 | 391.2843 | 231 | 53.9 | Diethyl phthalate                         |
| 371.3164 | 370.308 | -0.0009 | 371.3156 | 213 | 100  | Hexanedioic acid, bis(2-ethylhexyl) ester |
| 371.3164 | 370.308 | -0.0009 | 371.3156 | 108 | 100  | Hexanedioic acid, bis(2-ethylhexyl) ester |
| 371.3164 | 370.308 | -0.0009 | 371.3156 | 105 | 100  | Hexanedioic acid, bis(2-ethylhexyl) ester |
| 371.3164 | 370.308 | -0.0009 | 371.3156 | 163 | 100  | Hexanedioic acid, bis(2-ethylhexyl) ester |
| 371.3164 | 370.308 | -0.0009 | 371.3156 | 144 | 100  | Hexanedioic acid, bis(2-ethylhexyl) ester |
| 371.3164 | 370.308 | -0.0009 | 371.3156 | 106 | 100  | Hexanedioic acid, bis(2-ethylhexyl) ester |
| 371.3164 | 370.308 | -0.0009 | 371.3156 | 152 | 100  | Hexanedioic acid, bis(2-ethylhexyl) ester |

|          |         |         |          |     |      |                                           |
|----------|---------|---------|----------|-----|------|-------------------------------------------|
| 371.3164 | 370.308 | -0.0009 | 371.3156 | 137 | 100  | Hexanedioic acid, bis(2-ethylhexyl) ester |
| 371.3164 | 370.308 | -0.0009 | 371.3156 | 104 | 100  | Hexanedioic acid, bis(2-ethylhexyl) ester |
| 371.3164 | 370.308 | -0.0009 | 371.3156 | 151 | 100  | Hexanedioic acid, bis(2-ethylhexyl) ester |
| 371.3164 | 370.308 | -0.0009 | 371.3156 | 137 | 100  | Hexanedioic acid, bis(2-ethylhexyl) ester |
| 371.3164 | 370.308 | -0.0009 | 371.3156 | 117 | 100  | Hexanedioic acid, bis(2-ethylhexyl) ester |
| 118.0873 | 117.079 | -0.001  | 118.0863 | 358 | 61   | Betaine                                   |
| 118.0873 | 117.079 | -0.001  | 118.0863 | 355 | 61   | Betaine                                   |
| 118.0873 | 117.079 | -0.001  | 118.0863 | 351 | 61   | Betaine                                   |
| 118.0873 | 117.079 | -0.001  | 118.0863 | 304 | 67.6 | Betaine                                   |
| 118.0873 | 117.079 | -0.001  | 118.0863 | 301 | 67.6 | Betaine                                   |
| 118.0873 | 117.079 | -0.001  | 118.0863 | 299 | 67.6 | Betaine                                   |
| 118.0873 | 117.079 | -0.001  | 118.0863 | 287 | 63.7 | Betaine                                   |
| 118.0873 | 117.079 | -0.001  | 118.0863 | 287 | 63.7 | Betaine                                   |
| 118.0873 | 117.079 | -0.001  | 118.0863 | 284 | 63.7 | Betaine                                   |
| 371.3164 | 370.308 | -0.0009 | 371.3156 | 175 | 100  | Hexanedioic acid, bis(2-ethylhexyl) ester |
| 371.3164 | 370.308 | -0.0009 | 371.3156 | 115 | 100  | Hexanedioic acid, bis(2-ethylhexyl) ester |
| 371.3164 | 370.308 | -0.0009 | 371.3156 | 110 | 100  | Hexanedioic acid, bis(2-ethylhexyl) ester |
| 371.3164 | 370.308 | -0.0009 | 371.3156 | 154 | 100  | Hexanedioic acid, bis(2-ethylhexyl) ester |
| 371.3164 | 370.308 | -0.0009 | 371.3156 | 143 | 100  | Hexanedioic acid, bis(2-ethylhexyl) ester |
| 371.3164 | 370.308 | -0.0009 | 371.3156 | 142 | 100  | Hexanedioic acid, bis(2-ethylhexyl) ester |
| 371.3164 | 370.308 | -0.0009 | 371.3156 | 87  | 100  | Hexanedioic acid, bis(2-ethylhexyl) ester |
| 371.3164 | 370.308 | -0.0009 | 371.3156 | 77  | 100  | Hexanedioic acid, bis(2-ethylhexyl) ester |
| 371.3164 | 370.308 | -0.0009 | 371.3156 | 65  | 100  | Hexanedioic acid, bis(2-ethylhexyl) ester |
| 371.3164 | 370.308 | -0.0009 | 371.3156 | 157 | 100  | Hexanedioic acid, bis(2-ethylhexyl) ester |
| 371.3164 | 370.308 | -0.0009 | 371.3156 | 140 | 100  | Hexanedioic acid, bis(2-ethylhexyl) ester |
| 371.3164 | 370.308 | -0.0009 | 371.3156 | 125 | 100  | Hexanedioic acid, bis(2-ethylhexyl) ester |
| 118.0873 | 117.079 | -0.001  | 118.0863 | 315 | 30.2 | Betaine                                   |
| 118.0873 | 117.079 | -0.001  | 118.0863 | 313 | 30.2 | Betaine                                   |
| 118.0873 | 117.079 | -0.001  | 118.0863 | 311 | 30.2 | Betaine                                   |
| 118.0873 | 117.079 | -0.001  | 118.0863 | 333 | 81.9 | Betaine                                   |

|          |         |         |          |     |      |                                             |
|----------|---------|---------|----------|-----|------|---------------------------------------------|
| 118.0873 | 117.079 | -0.001  | 118.0863 | 325 | 81.9 | Betaine                                     |
| 118.0873 | 117.079 | -0.001  | 118.0863 | 312 | 81.9 | Betaine                                     |
| 118.0873 | 117.079 | -0.001  | 118.0863 | 297 | 66.5 | Betaine                                     |
| 118.0873 | 117.079 | -0.001  | 118.0863 | 294 | 66.5 | Betaine                                     |
| 118.0873 | 117.079 | -0.001  | 118.0863 | 290 | 66.5 | Betaine                                     |
| 97.0774  | 114.104 | 0.0238  | 97.1012  | 44  | 24   | Cyclohexanol, 1-methyl-                     |
| 97.0774  | 114.104 | 0.0238  | 97.1012  | 36  | 17.9 | Cycloheptanol                               |
| 97.0774  | 114.104 | 0.0238  | 97.1012  | 32  | 15.1 | Cyclohexanemethanol                         |
| 338.3423 | 337.334 | -0.0005 | 338.3417 | 165 | 100  | 13-Docosenamide, (Z)-                       |
| 338.3423 | 337.334 | -0.0005 | 338.3417 | 161 | 100  | 13-Docosenamide, (Z)-                       |
| 338.3423 | 337.334 | -0.0005 | 338.3417 | 159 | 100  | 13-Docosenamide, (Z)-                       |
| 338.3423 | 337.334 | -0.0005 | 338.3417 | 291 | 100  | 13-Docosenamide, (Z)-                       |
| 338.3423 | 337.334 | -0.0005 | 338.3417 | 278 | 100  | 13-Docosenamide, (Z)-                       |
| 338.3423 | 337.334 | -0.0005 | 338.3417 | 274 | 100  | 13-Docosenamide, (Z)-                       |
| 338.3423 | 337.334 | -0.0005 | 338.3417 | 83  | 100  | 13-Docosenamide, (Z)-                       |
| 338.3423 | 337.334 | -0.0005 | 338.3417 | 74  | 100  | 13-Docosenamide, (Z)-                       |
| 338.3423 | 337.334 | -0.0005 | 338.3417 | 74  | 100  | 13-Docosenamide, (Z)-                       |
| 338.3423 | 337.334 | -0.0005 | 338.3417 | 194 | 100  | 13-Docosenamide, (Z)-                       |
| 338.3423 | 337.334 | -0.0005 | 338.3417 | 191 | 100  | 13-Docosenamide, (Z)-                       |
| 338.3423 | 337.334 | -0.0005 | 338.3417 | 187 | 100  | 13-Docosenamide, (Z)-                       |
| 371.3164 | 370.308 | -0.0009 | 371.3156 | 195 | 100  | Hexanedioic acid, bis(2-ethylhexyl) ester   |
| 371.3164 | 370.308 | -0.0009 | 371.3156 | 150 | 100  | Hexanedioic acid, bis(2-ethylhexyl) ester   |
| 371.3164 | 370.308 | -0.0009 | 371.3156 | 149 | 100  | Hexanedioic acid, bis(2-ethylhexyl) ester   |
| 371.3164 | 370.308 | -0.0009 | 371.3156 | 161 | 100  | Hexanedioic acid, bis(2-ethylhexyl) ester   |
| 371.3164 | 370.308 | -0.0009 | 371.3156 | 148 | 100  | Hexanedioic acid, bis(2-ethylhexyl) ester   |
| 371.3164 | 370.308 | -0.0009 | 371.3156 | 142 | 100  | Hexanedioic acid, bis(2-ethylhexyl) ester   |
| 371.3164 | 370.308 | -0.0009 | 371.3156 | 105 | 100  | Hexanedioic acid, bis(2-ethylhexyl) ester   |
| 371.3164 | 370.308 | -0.0009 | 371.3156 | 91  | 100  | Hexanedioic acid, bis(2-ethylhexyl) ester   |
| 371.3164 | 370.308 | -0.0009 | 371.3156 | 59  | 100  | Hexanedioic acid, bis(2-ethylhexyl) ester   |
| 371.3164 | 370.308 | -0.0009 | 371.3156 | 183 | 100  | Hexanedioic acid, bis(2-ethylhexyl) ester   |
| 371.3164 | 370.308 | -0.0009 | 371.3156 | 158 | 100  | Hexanedioic acid, bis(2-ethylhexyl) ester   |
| 371.3164 | 370.308 | -0.0009 | 371.3156 | 107 | 100  | Hexanedioic acid, bis(2-ethylhexyl) ester   |
| 419.3188 | 418.308 | -0.0032 | 419.3156 | 158 | 100  | 1,2-Benzenedicarboxylic acid, dinonyl ester |

|          |         |         |          |     |      |                                             |
|----------|---------|---------|----------|-----|------|---------------------------------------------|
| 419.3188 | 418.308 | -0.0032 | 419.3156 | 202 | 100  | 1,2-Benzenedicarboxylic acid, dinonyl ester |
| 419.3188 | 418.308 | -0.0032 | 419.3156 | 208 | 100  | 1,2-Benzenedicarboxylic acid, dinonyl ester |
| 419.3188 | 418.308 | -0.0032 | 419.3156 | 209 | 100  | 1,2-Benzenedicarboxylic acid, dinonyl ester |
| 419.3188 | 418.308 | -0.0032 | 419.3156 | 160 | 100  | 1,2-Benzenedicarboxylic acid, dinonyl ester |
| 419.3188 | 418.308 | -0.0032 | 419.3156 | 204 | 100  | 1,2-Benzenedicarboxylic acid, dinonyl ester |
| 419.3188 | 418.308 | -0.0032 | 419.3156 | 209 | 100  | 1,2-Benzenedicarboxylic acid, dinonyl ester |
| 371.3164 | 370.308 | -0.0009 | 371.3156 | 218 | 100  | Hexanedioic acid, bis(2-ethylhexyl) ester   |
| 371.3164 | 370.308 | -0.0009 | 371.3156 | 81  | 100  | Hexanedioic acid, bis(2-ethylhexyl) ester   |
| 371.3164 | 370.308 | -0.0009 | 371.3156 | 76  | 100  | Hexanedioic acid, bis(2-ethylhexyl) ester   |
| 371.3164 | 370.308 | -0.0009 | 371.3156 | 153 | 100  | Hexanedioic acid, bis(2-ethylhexyl) ester   |
| 371.3164 | 370.308 | -0.0009 | 371.3156 | 142 | 100  | Hexanedioic acid, bis(2-ethylhexyl) ester   |
| 371.3164 | 370.308 | -0.0009 | 371.3156 | 140 | 100  | Hexanedioic acid, bis(2-ethylhexyl) ester   |
| 371.3164 | 370.308 | -0.0009 | 371.3156 | 93  | 100  | Hexanedioic acid, bis(2-ethylhexyl) ester   |
| 371.3164 | 370.308 | -0.0009 | 371.3156 | 56  | 100  | Hexanedioic acid, bis(2-ethylhexyl) ester   |
| 371.3164 | 370.308 | -0.0009 | 371.3156 | 84  | 100  | Hexanedioic acid, bis(2-ethylhexyl) ester   |
| 371.3164 | 370.308 | -0.0009 | 371.3156 | 70  | 100  | Hexanedioic acid, bis(2-ethylhexyl) ester   |
| 371.3164 | 370.308 | -0.0009 | 371.3156 | 60  | 100  | Hexanedioic acid, bis(2-ethylhexyl) ester   |
| 118.0873 | 117.079 | -0.001  | 118.0863 | 286 | 42   | Betaine                                     |
| 118.0873 | 117.079 | -0.001  | 118.0863 | 285 | 42   | Betaine                                     |
| 118.0873 | 117.079 | -0.001  | 118.0863 | 285 | 42   | Betaine                                     |
| 118.0873 | 117.079 | -0.001  | 118.0863 | 319 | 63.4 | Betaine                                     |
| 118.0873 | 117.079 | -0.001  | 118.0863 | 316 | 63.4 | Betaine                                     |
| 118.0873 | 117.079 | -0.001  | 118.0863 | 315 | 63.4 | Betaine                                     |
| 371.3164 | 370.308 | -0.0009 | 371.3156 | 201 | 100  | Hexanedioic acid, bis(2-ethylhexyl) ester   |
| 371.3164 | 370.308 | -0.0009 | 371.3156 | 130 | 100  | Hexanedioic acid, bis(2-ethylhexyl) ester   |
| 371.3164 | 370.308 | -0.0009 | 371.3156 | 129 | 100  | Hexanedioic acid, bis(2-ethylhexyl) ester   |

|          |         |         |          |     |      |                                             |
|----------|---------|---------|----------|-----|------|---------------------------------------------|
| 371.3164 | 370.308 | -0.0009 | 371.3156 | 173 | 100  | Hexanedioic acid, bis(2-ethylhexyl) ester   |
| 371.3164 | 370.308 | -0.0009 | 371.3156 | 168 | 100  | Hexanedioic acid, bis(2-ethylhexyl) ester   |
| 371.3164 | 370.308 | -0.0009 | 371.3156 | 158 | 100  | Hexanedioic acid, bis(2-ethylhexyl) ester   |
| 371.3164 | 370.308 | -0.0009 | 371.3156 | 86  | 100  | Hexanedioic acid, bis(2-ethylhexyl) ester   |
| 371.3164 | 370.308 | -0.0009 | 371.3156 | 69  | 100  | Hexanedioic acid, bis(2-ethylhexyl) ester   |
| 371.3164 | 370.308 | -0.0009 | 371.3156 | 57  | 100  | Hexanedioic acid, bis(2-ethylhexyl) ester   |
| 371.3164 | 370.308 | -0.0009 | 371.3156 | 123 | 100  | Hexanedioic acid, bis(2-ethylhexyl) ester   |
| 371.3164 | 370.308 | -0.0009 | 371.3156 | 103 | 100  | Hexanedioic acid, bis(2-ethylhexyl) ester   |
| 371.3164 | 370.308 | -0.0009 | 371.3156 | 71  | 100  | Hexanedioic acid, bis(2-ethylhexyl) ester   |
| 118.0873 | 117.079 | -0.001  | 118.0863 | 267 | 83.5 | Betaine                                     |
| 118.0873 | 117.079 | -0.001  | 118.0863 | 266 | 83.5 | Betaine                                     |
| 118.0873 | 117.079 | -0.001  | 118.0863 | 265 | 83.5 | Betaine                                     |
| 118.0873 | 117.079 | -0.001  | 118.0863 | 271 | 63.1 | Betaine                                     |
| 118.0873 | 117.079 | -0.001  | 118.0863 | 269 | 63.1 | Betaine                                     |
| 118.0873 | 117.079 | -0.001  | 118.0863 | 268 | 63.1 | Betaine                                     |
| 118.0873 | 117.079 | -0.001  | 118.0863 | 309 | 53.2 | Betaine                                     |
| 118.0873 | 117.079 | -0.001  | 118.0863 | 307 | 53.2 | Betaine                                     |
| 118.0873 | 117.079 | -0.001  | 118.0863 | 304 | 53.2 | Betaine                                     |
| 97.0774  | 114.104 | 0.0238  | 97.1012  | 41  | 26.9 | Cyclohexanol, 4-methyl-, trans-             |
| 97.0774  | 114.104 | 0.0238  | 97.1012  | 31  | 19   | Cyclohexanemethanol                         |
| 97.0774  | 114.104 | 0.0238  | 97.1012  | 30  | 18.3 | Cyclohexanol, 2-methyl-, trans-             |
| 419.3188 | 418.308 | -0.0032 | 419.3156 | 181 | 100  | 1,2-Benzenedicarboxylic acid, dinonyl ester |
| 419.3188 | 418.308 | -0.0032 | 419.3156 | 204 | 100  | 1,2-Benzenedicarboxylic acid, dinonyl ester |
| 419.3188 | 418.308 | -0.0032 | 419.3156 | 206 | 100  | 1,2-Benzenedicarboxylic acid, dinonyl ester |
| 419.3188 | 418.308 | -0.0032 | 419.3156 | 206 | 100  | 1,2-Benzenedicarboxylic acid, dinonyl ester |
| 118.0873 | 117.079 | -0.001  | 118.0863 | 263 | 100  | Betaine                                     |
| 118.0873 | 117.079 | -0.001  | 118.0863 | 220 | 100  | Betaine                                     |
| 118.0873 | 117.079 | -0.001  | 118.0863 | 220 | 100  | Betaine                                     |
| 118.0873 | 117.079 | -0.001  | 118.0863 | 284 | 61.9 | Betaine                                     |
| 118.0873 | 117.079 | -0.001  | 118.0863 | 284 | 61.9 | Betaine                                     |
| 118.0873 | 117.079 | -0.001  | 118.0863 | 281 | 61.9 | Betaine                                     |
| 97.0774  | 114.104 | 0.0238  | 97.1012  | 34  | 22.3 | Cyclohexanol, 1-methyl-                     |
| 97.0774  | 114.104 | 0.0238  | 97.1012  | 27  | 17.1 | Cyclohexanemethanol                         |
| 97.0774  | 114.104 | 0.0238  | 97.1012  | 26  | 16.4 | Cycloheptanol                               |

|          |         |         |          |     |      |                                             |
|----------|---------|---------|----------|-----|------|---------------------------------------------|
| 419.3188 | 418.308 | -0.0032 | 419.3156 | 204 | 100  | 1,2-Benzenedicarboxylic acid, dinonyl ester |
| 419.3188 | 418.308 | -0.0032 | 419.3156 | 207 | 100  | 1,2-Benzenedicarboxylic acid, dinonyl ester |
| 419.3188 | 418.308 | -0.0032 | 419.3156 | 210 | 100  | 1,2-Benzenedicarboxylic acid, dinonyl ester |
| 419.3188 | 418.308 | -0.0032 | 419.3156 | 204 | 100  | 1,2-Benzenedicarboxylic acid, dinonyl ester |
| 371.3239 | 370.308 | -0.0083 | 371.3156 | 242 | 100  | Hexanedioic acid, bis(2-ethylhexyl) ester   |
| 371.3239 | 370.308 | -0.0083 | 371.3156 | 94  | 100  | Hexanedioic acid, bis(2-ethylhexyl) ester   |
| 371.3239 | 370.308 | -0.0083 | 371.3156 | 90  | 100  | Hexanedioic acid, bis(2-ethylhexyl) ester   |
| 371.3239 | 370.308 | -0.0083 | 371.3156 | 148 | 100  | Hexanedioic acid, bis(2-ethylhexyl) ester   |
| 371.3239 | 370.308 | -0.0083 | 371.3156 | 130 | 100  | Hexanedioic acid, bis(2-ethylhexyl) ester   |
| 371.3239 | 370.308 | -0.0083 | 371.3156 | 114 | 100  | Hexanedioic acid, bis(2-ethylhexyl) ester   |
| 371.3239 | 370.308 | -0.0083 | 371.3156 | 49  | 100  | Hexanedioic acid, bis(2-ethylhexyl) ester   |
| 371.3239 | 370.308 | -0.0083 | 371.3156 | 169 | 100  | Hexanedioic acid, bis(2-ethylhexyl) ester   |
| 371.3239 | 370.308 | -0.0083 | 371.3156 | 154 | 100  | Hexanedioic acid, bis(2-ethylhexyl) ester   |
| 371.3239 | 370.308 | -0.0083 | 371.3156 | 137 | 100  | Hexanedioic acid, bis(2-ethylhexyl) ester   |
| 118.0941 | 117.079 | -0.0078 | 118.0863 | 284 | 75.8 | Betaine                                     |
| 118.0941 | 117.079 | -0.0078 | 118.0863 | 281 | 75.8 | Betaine                                     |
| 118.0941 | 117.079 | -0.0078 | 118.0863 | 277 | 75.8 | Betaine                                     |
| 118.0941 | 117.079 | -0.0078 | 118.0863 | 383 | 53.6 | Betaine                                     |
| 118.0941 | 117.079 | -0.0078 | 118.0863 | 381 | 53.6 | Betaine                                     |
| 118.0941 | 117.079 | -0.0078 | 118.0863 | 376 | 53.6 | Betaine                                     |
| 118.0941 | 117.079 | -0.0078 | 118.0863 | 276 | 32.7 | Betaine                                     |
| 118.0941 | 117.079 | -0.0078 | 118.0863 | 275 | 32.7 | Betaine                                     |
| 118.0941 | 117.079 | -0.0078 | 118.0863 | 275 | 32.7 | Betaine                                     |
| 118.0941 | 117.079 | -0.0078 | 118.0863 | 309 | 44.9 | Betaine                                     |
| 118.0941 | 117.079 | -0.0078 | 118.0863 | 308 | 44.9 | Betaine                                     |
| 118.0941 | 117.079 | -0.0078 | 118.0863 | 307 | 44.9 | Betaine                                     |
| 419.3188 | 418.308 | -0.0032 | 419.3156 | 212 | 100  | 1,2-Benzenedicarboxylic acid, dinonyl ester |
| 419.3188 | 418.308 | -0.0032 | 419.3156 | 203 | 100  | 1,2-Benzenedicarboxylic acid, dinonyl ester |
| 419.3188 | 418.308 | -0.0032 | 419.3156 | 207 | 100  | 1,2-Benzenedicarboxylic acid, dinonyl ester |

|          |         |         |          |     |      |                                             |
|----------|---------|---------|----------|-----|------|---------------------------------------------|
| 419.3188 | 418.308 | -0.0032 | 419.3156 | 198 | 100  | 1,2-Benzenedicarboxylic acid, dinonyl ester |
| 371.3164 | 370.308 | -0.0009 | 371.3156 | 175 | 100  | Hexanedioic acid, bis(2-ethylhexyl) ester   |
| 371.3164 | 370.308 | -0.0009 | 371.3156 | 69  | 100  | Hexanedioic acid, bis(2-ethylhexyl) ester   |
| 371.3164 | 370.308 | -0.0009 | 371.3156 | 64  | 100  | Hexanedioic acid, bis(2-ethylhexyl) ester   |
| 371.3164 | 370.308 | -0.0009 | 371.3156 | 143 | 100  | Hexanedioic acid, bis(2-ethylhexyl) ester   |
| 371.3164 | 370.308 | -0.0009 | 371.3156 | 108 | 100  | Hexanedioic acid, bis(2-ethylhexyl) ester   |
| 371.3164 | 370.308 | -0.0009 | 371.3156 | 96  | 100  | Hexanedioic acid, bis(2-ethylhexyl) ester   |
| 371.3164 | 370.308 | -0.0009 | 371.3156 | 71  | 100  | Hexanedioic acid, bis(2-ethylhexyl) ester   |
| 371.3164 | 370.308 | -0.0009 | 371.3156 | 58  | 100  | Hexanedioic acid, bis(2-ethylhexyl) ester   |
| 371.3164 | 370.308 | -0.0009 | 371.3156 | 44  | 100  | Hexanedioic acid, bis(2-ethylhexyl) ester   |
| 371.3164 | 370.308 | -0.0009 | 371.3156 | 180 | 100  | Hexanedioic acid, bis(2-ethylhexyl) ester   |
| 371.3164 | 370.308 | -0.0009 | 371.3156 | 158 | 100  | Hexanedioic acid, bis(2-ethylhexyl) ester   |
| 371.3164 | 370.308 | -0.0009 | 371.3156 | 108 | 100  | Hexanedioic acid, bis(2-ethylhexyl) ester   |
| 118.0873 | 117.079 | -0.001  | 118.0863 | 313 | 56.3 | Betaine                                     |
| 118.0873 | 117.079 | -0.001  | 118.0863 | 313 | 56.3 | Betaine                                     |
| 118.0873 | 117.079 | -0.001  | 118.0863 | 303 | 56.3 | Betaine                                     |
| 118.0873 | 117.079 | -0.001  | 118.0863 | 256 | 100  | Betaine                                     |
| 118.0873 | 117.079 | -0.001  | 118.0863 | 254 | 100  | Betaine                                     |
| 118.0873 | 117.079 | -0.001  | 118.0863 | 253 | 100  | Betaine                                     |
| 118.0873 | 117.079 | -0.001  | 118.0863 | 329 | 40.6 | Betaine                                     |
| 118.0873 | 117.079 | -0.001  | 118.0863 | 326 | 40.6 | Betaine                                     |
| 118.0873 | 117.079 | -0.001  | 118.0863 | 323 | 40.6 | Betaine                                     |
| 118.0873 | 117.079 | -0.001  | 118.0863 | 308 | 58.8 | Betaine                                     |
| 118.0873 | 117.079 | -0.001  | 118.0863 | 307 | 58.8 | Betaine                                     |
| 118.0873 | 117.079 | -0.001  | 118.0863 | 299 | 58.8 | Betaine                                     |
| 118.0873 | 117.079 | -0.001  | 118.0863 | 282 | 64.4 | Betaine                                     |
| 118.0873 | 117.079 | -0.001  | 118.0863 | 281 | 64.4 | Betaine                                     |
| 118.0873 | 117.079 | -0.001  | 118.0863 | 279 | 64.4 | Betaine                                     |
| 118.0873 | 117.079 | -0.001  | 118.0863 | 291 | 28.2 | Betaine                                     |
| 118.0873 | 117.079 | -0.001  | 118.0863 | 289 | 28.2 | Betaine                                     |
| 118.0873 | 117.079 | -0.001  | 118.0863 | 289 | 28.2 | Betaine                                     |
| 371.3164 | 370.308 | -0.0009 | 371.3156 | 174 | 100  | Hexanedioic acid, bis(2-ethylhexyl) ester   |



|          |         |         |          |     |      |                                             |
|----------|---------|---------|----------|-----|------|---------------------------------------------|
| 371.3164 | 370.308 | -0.0009 | 371.3156 | 109 | 100  | Hexanedioic acid, bis(2-ethylhexyl) ester   |
| 371.3164 | 370.308 | -0.0009 | 371.3156 | 95  | 100  | Hexanedioic acid, bis(2-ethylhexyl) ester   |
| 371.3164 | 370.308 | -0.0009 | 371.3156 | 128 | 100  | Hexanedioic acid, bis(2-ethylhexyl) ester   |
| 371.3164 | 370.308 | -0.0009 | 371.3156 | 111 | 100  | Hexanedioic acid, bis(2-ethylhexyl) ester   |
| 371.3164 | 370.308 | -0.0009 | 371.3156 | 98  | 100  | Hexanedioic acid, bis(2-ethylhexyl) ester   |
| 371.3164 | 370.308 | -0.0009 | 371.3156 | 103 | 100  | Hexanedioic acid, bis(2-ethylhexyl) ester   |
| 371.3164 | 370.308 | -0.0009 | 371.3156 | 75  | 100  | Hexanedioic acid, bis(2-ethylhexyl) ester   |
| 371.3164 | 370.308 | -0.0009 | 371.3156 | 70  | 100  | Hexanedioic acid, bis(2-ethylhexyl) ester   |
| 371.3164 | 370.308 | -0.0009 | 371.3156 | 177 | 100  | Hexanedioic acid, bis(2-ethylhexyl) ester   |
| 371.3164 | 370.308 | -0.0009 | 371.3156 | 157 | 100  | Hexanedioic acid, bis(2-ethylhexyl) ester   |
| 371.3164 | 370.308 | -0.0009 | 371.3156 | 118 | 100  | Hexanedioic acid, bis(2-ethylhexyl) ester   |
| 393.2988 | 392.293 | 0.0011  | 393.2999 | 45  | 100  | Chenodeoxycholic acid                       |
| 419.3188 | 418.308 | -0.0032 | 419.3156 | 210 | 100  | 1,2-Benzenedicarboxylic acid, dinonyl ester |
| 419.3188 | 418.308 | -0.0032 | 419.3156 | 203 | 100  | 1,2-Benzenedicarboxylic acid, dinonyl ester |
| 419.3188 | 418.308 | -0.0032 | 419.3156 | 211 | 100  | 1,2-Benzenedicarboxylic acid, dinonyl ester |
| 419.3188 | 418.308 | -0.0032 | 419.3156 | 196 | 100  | 1,2-Benzenedicarboxylic acid, dinonyl ester |
| 118.0873 | 117.079 | -0.001  | 118.0863 | 146 | 100  | N-Methyl-.alpha.-aminoisobutyric acid       |
| 118.0873 | 117.079 | -0.001  | 118.0863 | 144 | 100  | N-Methyl-.alpha.-aminoisobutyric acid       |
| 118.0873 | 117.079 | -0.001  | 118.0863 | 143 | 100  | N-Methyl-.alpha.-aminoisobutyric acid       |
| 118.0873 | 117.079 | -0.001  | 118.0863 | 369 | 66.2 | Betaine                                     |
| 118.0873 | 117.079 | -0.001  | 118.0863 | 366 | 66.2 | Betaine                                     |
| 118.0873 | 117.079 | -0.001  | 118.0863 | 360 | 66.2 | Betaine                                     |
| 118.0873 | 117.079 | -0.001  | 118.0863 | 277 | 60.2 | Betaine                                     |
| 118.0873 | 117.079 | -0.001  | 118.0863 | 275 | 60.2 | Betaine                                     |
| 118.0873 | 117.079 | -0.001  | 118.0863 | 275 | 60.2 | Betaine                                     |
| 118.0873 | 117.079 | -0.001  | 118.0863 | 339 | 36.6 | Betaine                                     |
| 118.0873 | 117.079 | -0.001  | 118.0863 | 338 | 36.6 | Betaine                                     |
| 118.0873 | 117.079 | -0.001  | 118.0863 | 331 | 36.6 | Betaine                                     |
| 106.0872 | 105     | 0       | 106.09   | 152 | 77.2 | Diethanolamine                              |

|          |         |         |          |     |      |                                             |
|----------|---------|---------|----------|-----|------|---------------------------------------------|
| 106.0872 | 105.079 | -0.0009 | 106.0863 | 121 | 21   | Diethanolamine                              |
| 106.0872 | 105.079 | -0.0009 | 106.0863 | 120 | 21   | Diethanolamine                              |
| 106.0872 | 105.079 | -0.0009 | 106.0863 | 115 | 100  | Diethanolamine                              |
| 106.0872 | 105.079 | -0.0009 | 106.0863 | 114 | 100  | Diethanolamine                              |
| 106.0872 | 105.079 | -0.0009 | 106.0863 | 114 | 100  | Diethanolamine                              |
| 393.2988 | 392.293 | 0.0011  | 393.2999 | 36  | 100  | Chenodeoxycholic acid                       |
| 419.3188 | 418.308 | -0.0032 | 419.3156 | 204 | 100  | 1,2-Benzenedicarboxylic acid, dinonyl ester |
| 419.3188 | 418.308 | -0.0032 | 419.3156 | 208 | 100  | 1,2-Benzenedicarboxylic acid, dinonyl ester |
| 419.3188 | 418.308 | -0.0032 | 419.3156 | 202 | 100  | 1,2-Benzenedicarboxylic acid, dinonyl ester |
| 419.3188 | 418.308 | -0.0032 | 419.3156 | 206 | 100  | 1,2-Benzenedicarboxylic acid, dinonyl ester |
| 371.3164 | 370.308 | -0.0009 | 371.3156 | 195 | 100  | Hexanedioic acid, bis(2-ethylhexyl) ester   |
| 371.3164 | 370.308 | -0.0009 | 371.3156 | 117 | 100  | Hexanedioic acid, bis(2-ethylhexyl) ester   |
| 371.3164 | 370.308 | -0.0009 | 371.3156 | 111 | 100  | Hexanedioic acid, bis(2-ethylhexyl) ester   |
| 371.3164 | 370.308 | -0.0009 | 371.3156 | 138 | 100  | Hexanedioic acid, bis(2-ethylhexyl) ester   |
| 371.3164 | 370.308 | -0.0009 | 371.3156 | 120 | 100  | Hexanedioic acid, bis(2-ethylhexyl) ester   |
| 371.3164 | 370.308 | -0.0009 | 371.3156 | 88  | 100  | Hexanedioic acid, bis(2-ethylhexyl) ester   |
| 371.3164 | 370.308 | -0.0009 | 371.3156 | 115 | 100  | Hexanedioic acid, bis(2-ethylhexyl) ester   |
| 371.3164 | 370.308 | -0.0009 | 371.3156 | 77  | 100  | Hexanedioic acid, bis(2-ethylhexyl) ester   |
| 371.3164 | 370.308 | -0.0009 | 371.3156 | 65  | 100  | Hexanedioic acid, bis(2-ethylhexyl) ester   |
| 393.2988 | 392.293 | 0.0011  | 393.2999 | 33  | 100  | Chenodeoxycholic acid                       |
| 393.2988 | 392.293 | 0.0011  | 393.2999 | 29  | 100  | Chenodeoxycholic acid                       |
| 84.0822  | 102.092 | -0.0014 | 84.0808  | 226 | 51   | Betaine aldehyde cation                     |
| 84.0822  | 102.092 | -0.0014 | 84.0808  | 225 | 49   | Betaine aldehyde cation                     |
| 84.0822  | 102.092 | -0.0014 | 84.0808  | 177 | 51   | Betaine aldehyde cation                     |
| 84.0822  | 102.092 | -0.0014 | 84.0808  | 176 | 49   | Betaine aldehyde cation                     |
| 84.0822  | 102.092 | -0.0014 | 84.0808  | 138 | 51   | Betaine aldehyde cation                     |
| 84.0822  | 102.092 | -0.0014 | 84.0808  | 137 | 49   | Betaine aldehyde cation                     |
| 118.0873 | 117.079 | -0.001  | 118.0863 | 311 | 49.1 | Betaine                                     |
| 118.0873 | 117.079 | -0.001  | 118.0863 | 307 | 49.1 | Betaine                                     |
| 118.0873 | 117.079 | -0.001  | 118.0863 | 305 | 49.1 | Betaine                                     |
| 118.0873 | 117.079 | -0.001  | 118.0863 | 331 | 70.8 | Betaine                                     |
| 118.0873 | 117.079 | -0.001  | 118.0863 | 327 | 70.8 | Betaine                                     |
| 118.0873 | 117.079 | -0.001  | 118.0863 | 321 | 70.8 | Betaine                                     |
| 118.0873 | 117.079 | -0.001  | 118.0863 | 310 | 40.7 | Betaine                                     |

|          |         |         |          |     |      |                                                |
|----------|---------|---------|----------|-----|------|------------------------------------------------|
| 118.0873 | 117.079 | -0.001  | 118.0863 | 310 | 40.7 | Betaine                                        |
| 118.0873 | 117.079 | -0.001  | 118.0863 | 310 | 40.7 | Betaine                                        |
| 106.0872 | 105     | 0       | 106.09   | 168 | 73.3 | Diethanolamine                                 |
| 106.0872 | 105.079 | -0.0009 | 106.0863 | 139 | 20.8 | Diethanolamine                                 |
| 106.0872 | 105.079 | -0.0009 | 106.0863 | 138 | 20.8 | Diethanolamine                                 |
| 106.0872 | 105     | 0       | 106.09   | 150 | 78.2 | Diethanolamine                                 |
| 106.0872 | 105.079 | -0.0009 | 106.0863 | 120 | 21.8 | Diethanolamine                                 |
| 106.0872 | 105.079 | -0.0009 | 106.0863 | 120 | 21.8 | Diethanolamine                                 |
| 106.0872 | 105     | 0       | 106.09   | 227 | 66   | Diethanolamine                                 |
| 106.0872 | 105.079 | -0.0009 | 106.0863 | 209 | 34   | Diethanolamine                                 |
| 106.0872 | 105.079 | -0.0009 | 106.0863 | 207 | 34   | Diethanolamine                                 |
| 419.3188 | 418.308 | -0.0032 | 419.3156 | 205 | 100  | 1,2-Benzenedicarboxylic acid,<br>dinonyl ester |
| 118.0873 | 117.079 | -0.001  | 118.0863 | 347 | 39.5 | Betaine                                        |
| 118.0873 | 117.079 | -0.001  | 118.0863 | 346 | 39.5 | Betaine                                        |
| 118.0873 | 117.079 | -0.001  | 118.0863 | 343 | 39.5 | Betaine                                        |
| 118.0873 | 117.079 | -0.001  | 118.0863 | 299 | 72.7 | Betaine                                        |
| 118.0873 | 117.079 | -0.001  | 118.0863 | 291 | 72.7 | Betaine                                        |
| 118.0873 | 117.079 | -0.001  | 118.0863 | 279 | 72.7 | Betaine                                        |
| 118.0873 | 117.079 | -0.001  | 118.0863 | 344 | 53.2 | Betaine                                        |
| 118.0873 | 117.079 | -0.001  | 118.0863 | 339 | 53.2 | Betaine                                        |
| 118.0873 | 117.079 | -0.001  | 118.0863 | 338 | 53.2 | Betaine                                        |
| 106.0872 | 105     | 0       | 106.09   | 114 | 53.1 | Diethanolamine                                 |
| 106.0872 | 105.079 | -0.0009 | 106.0863 | 111 | 46.9 | Diethanolamine                                 |
| 106.0872 | 105     | 0       | 106.09   | 210 | 68.7 | Diethanolamine                                 |
| 106.0872 | 105.079 | -0.0009 | 106.0863 | 190 | 31.3 | Diethanolamine                                 |
| 106.0872 | 105.079 | -0.0009 | 106.0863 | 190 | 31.3 | Diethanolamine                                 |
| 84.0822  | 102.092 | -0.0014 | 84.0808  | 253 | 53.1 | Betaine aldehyde cation                        |
| 84.0822  | 102.092 | -0.0014 | 84.0808  | 250 | 46.9 | Betaine aldehyde cation                        |
| 84.0822  | 102.092 | -0.0014 | 84.0808  | 211 | 50   | Betaine aldehyde cation                        |
| 84.0822  | 102.092 | -0.0014 | 84.0808  | 211 | 50   | Betaine aldehyde cation                        |
| 186.0588 | 203.091 | 0.0285  | 186.0873 | 71  | 75.3 | Ala-Asn                                        |
| 186.0588 | 163.084 | 0.0149  | 186.0737 | 33  | 18.1 | N,N-Bis(2-hydroxyethyl)glycine                 |
| 186.0588 | 168.042 | 0.0173  | 186.0761 | 10  | 6.6  | 3-Hydroxy-4-methoxybenzoic acid                |
| 186.0588 | 163.084 | 0.0149  | 186.0737 | 146 | 100  | N,N-Bis(2-hydroxyethyl)glycine                 |
| 118.0873 | 117.079 | -0.001  | 118.0863 | 395 | 37.1 | Betaine                                        |
| 118.0873 | 117.079 | -0.001  | 118.0863 | 394 | 37.1 | Betaine                                        |
| 118.0873 | 117.079 | -0.001  | 118.0863 | 389 | 37.1 | Betaine                                        |
| 118.0873 | 117.079 | -0.001  | 118.0863 | 301 | 67.1 | Betaine                                        |
| 118.0873 | 117.079 | -0.001  | 118.0863 | 298 | 67.1 | Betaine                                        |
| 118.0873 | 117.079 | -0.001  | 118.0863 | 293 | 67.1 | Betaine                                        |
| 118.0873 | 117.079 | -0.001  | 118.0863 | 354 | 48.8 | Betaine                                        |
| 118.0873 | 117.079 | -0.001  | 118.0863 | 353 | 48.8 | Betaine                                        |
| 118.0873 | 117.079 | -0.001  | 118.0863 | 349 | 48.8 | Betaine                                        |
| 106.0872 | 105     | 0       | 106.09   | 159 | 78.9 | Diethanolamine                                 |
| 106.0872 | 105.079 | -0.0009 | 106.0863 | 127 | 21.1 | Diethanolamine                                 |

|          |         |         |          |     |      |                                       |
|----------|---------|---------|----------|-----|------|---------------------------------------|
| 106.0872 | 105.079 | -0.0009 | 106.0863 | 127 | 21.1 | Diethanolamine                        |
| 106.0872 | 105     | 0       | 106.09   | 231 | 79.3 | Diethanolamine                        |
| 106.0872 | 105.079 | -0.0009 | 106.0863 | 198 | 20.7 | Diethanolamine                        |
| 106.0872 | 105.079 | -0.0009 | 106.0863 | 197 | 20.7 | Diethanolamine                        |
| 106.0872 | 105.079 | -0.0009 | 106.0863 | 152 | 100  | Diethanolamine                        |
| 106.0872 | 105.079 | -0.0009 | 106.0863 | 152 | 100  | Diethanolamine                        |
| 106.0872 | 105.079 | -0.0009 | 106.0863 | 147 | 100  | Diethanolamine                        |
| 84.0822  | 102.092 | -0.0014 | 84.0808  | 261 | 51   | Betaine aldehyde cation               |
| 84.0822  | 102.092 | -0.0014 | 84.0808  | 260 | 49   | Betaine aldehyde cation               |
| 84.0822  | 102.092 | -0.0014 | 84.0808  | 206 | 51   | Betaine aldehyde cation               |
| 84.0822  | 102.092 | -0.0014 | 84.0808  | 205 | 49   | Betaine aldehyde cation               |
| 84.0822  | 102.092 | -0.0014 | 84.0808  | 181 | 52   | Betaine aldehyde cation               |
| 84.0822  | 102.092 | -0.0014 | 84.0808  | 179 | 48   | Betaine aldehyde cation               |
| 106.0872 | 105.079 | -0.0009 | 106.0863 | 126 | 100  | Diethanolamine                        |
| 106.0872 | 105.079 | -0.0009 | 106.0863 | 125 | 100  | Diethanolamine                        |
| 106.0872 | 105.079 | -0.0009 | 106.0863 | 124 | 100  | Diethanolamine                        |
| 84.0822  | 102.092 | -0.0014 | 84.0808  | 178 | 50   | Betaine aldehyde cation               |
| 84.0822  | 102.092 | -0.0014 | 84.0808  | 178 | 50   | Betaine aldehyde cation               |
| 84.0822  | 102.092 | -0.0014 | 84.0808  | 202 | 51   | Betaine aldehyde cation               |
| 84.0822  | 102.092 | -0.0014 | 84.0808  | 201 | 49   | Betaine aldehyde cation               |
| 84.0822  | 102.092 | -0.0014 | 84.0808  | 138 | 51   | Betaine aldehyde cation               |
| 84.0822  | 102.092 | -0.0014 | 84.0808  | 137 | 49   | Betaine aldehyde cation               |
| 553.3927 | 530.4   | -0.003  | 553.3897 | 1   | 17.2 | Didodecyl 3,3'-thiodipropionate oxide |
| 553.3927 | 530.4   | -0.003  | 553.3897 | 4   | 7.7  | Didodecyl 3,3'-thiodipropionate oxide |
| 553.3927 | 530.4   | -0.003  | 553.3897 | 3   | 7.4  | Didodecyl 3,3'-thiodipropionate oxide |
| 553.3927 | 530.4   | -0.003  | 553.3897 | 3   | 7.4  | Didodecyl 3,3'-thiodipropionate oxide |
| 553.3927 | 530.4   | -0.003  | 553.3897 | 10  | 8.5  | Didodecyl 3,3'-thiodipropionate oxide |
| 553.3927 | 530.4   | -0.003  | 553.3897 | 10  | 8.5  | Didodecyl 3,3'-thiodipropionate oxide |
| 553.3927 | 530.4   | -0.003  | 553.3897 | 10  | 8.5  | Didodecyl 3,3'-thiodipropionate oxide |
| 118.0873 | 117.079 | -0.001  | 118.0863 | 336 | 55.2 | Betaine                               |
| 118.0873 | 117.079 | -0.001  | 118.0863 | 334 | 55.2 | Betaine                               |
| 118.0873 | 117.079 | -0.001  | 118.0863 | 329 | 55.2 | Betaine                               |
| 118.0873 | 117.079 | -0.001  | 118.0863 | 269 | 62.3 | Betaine                               |
| 118.0873 | 117.079 | -0.001  | 118.0863 | 267 | 62.3 | Betaine                               |
| 118.0873 | 117.079 | -0.001  | 118.0863 | 265 | 62.3 | Betaine                               |
| 118.0873 | 117     | 0       | 118.09   | 343 | 24.5 | Betaine                               |
| 118.0873 | 117     | 0       | 118.09   | 341 | 22.6 | Betaine                               |
| 118.0873 | 117.079 | -0.001  | 118.0863 | 336 | 18.2 | Betaine                               |
| 553.3927 | 530.4   | -0.003  | 553.3897 | 88  | 14.4 | Didodecyl 3,3'-thiodipropionate oxide |

|          |         |         |          |     |      |                                       |
|----------|---------|---------|----------|-----|------|---------------------------------------|
| 553.3927 | 530.4   | -0.003  | 553.3897 | 88  | 14.4 | Didodecyl 3,3'-thiodipropionate oxide |
| 553.3927 | 530.4   | -0.003  | 553.3897 | 87  | 13.8 | Didodecyl 3,3'-thiodipropionate oxide |
| 531.4089 | 530.4   | -0.0011 | 531.4078 | 242 | 19.9 | Didodecyl 3,3'-thiodipropionate oxide |
| 531.4089 | 530.4   | -0.0011 | 531.4078 | 239 | 17.6 | Didodecyl 3,3'-thiodipropionate oxide |
| 531.4089 | 530.4   | -0.0011 | 531.4078 | 236 | 15.6 | Didodecyl 3,3'-thiodipropionate oxide |
| 531.4089 | 530.4   | -0.0011 | 531.4078 | 318 | 17.5 | Didodecyl 3,3'-thiodipropionate oxide |
| 531.4089 | 530.4   | -0.0011 | 531.4078 | 315 | 15.5 | Didodecyl 3,3'-thiodipropionate oxide |
| 531.4089 | 530.4   | -0.0011 | 531.4078 | 311 | 13.1 | Didodecyl 3,3'-thiodipropionate oxide |
| 531.4089 | 530.4   | -0.0011 | 531.4078 | 197 | 14   | Didodecyl 3,3'-thiodipropionate oxide |
| 531.4089 | 530.4   | -0.0011 | 531.4078 | 197 | 14   | Didodecyl 3,3'-thiodipropionate oxide |
| 531.4089 | 530.4   | -0.0011 | 531.4078 | 196 | 13.5 | Didodecyl 3,3'-thiodipropionate oxide |
| 531.4089 | 530.4   | -0.0011 | 531.4078 | 297 | 35.6 | Didodecyl 3,3'-thiodipropionate oxide |
| 531.4089 | 530.4   | -0.0011 | 531.4078 | 293 | 30.1 | Didodecyl 3,3'-thiodipropionate oxide |
| 531.4089 | 530.4   | -0.0011 | 531.4078 | 264 | 8.5  | Didodecyl 3,3'-thiodipropionate oxide |
| 118.0873 | 117.079 | -0.001  | 118.0863 | 366 | 24   | Betaine                               |
| 118.0873 | 117     | 0       | 118.09   | 366 | 24   | Betaine                               |
| 118.0873 | 117.079 | -0.001  | 118.0863 | 365 | 24   | Betaine                               |
| 118.0873 | 117.079 | -0.001  | 118.0863 | 278 | 62.9 | Betaine                               |
| 118.0873 | 117.079 | -0.001  | 118.0863 | 278 | 62.9 | Betaine                               |
| 118.0873 | 117.079 | -0.001  | 118.0863 | 276 | 62.9 | Betaine                               |
| 118.0873 | 117.079 | -0.001  | 118.0863 | 337 | 42.2 | Betaine                               |
| 118.0873 | 117.079 | -0.001  | 118.0863 | 335 | 42.2 | Betaine                               |
| 118.0873 | 117.079 | -0.001  | 118.0863 | 334 | 42.2 | Betaine                               |
| 553.3927 | 530.4   | -0.003  | 553.3897 | 3   | 21.3 | Didodecyl 3,3'-thiodipropionate oxide |
| 553.3927 | 530.4   | -0.003  | 553.3897 | 2   | 20.5 | Didodecyl 3,3'-thiodipropionate oxide |
| 553.3927 | 530.4   | -0.003  | 553.3897 | 1   | 19.7 | Didodecyl 3,3'-thiodipropionate oxide |
| 553.3927 | 530.4   | -0.003  | 553.3897 | 38  | 10.8 | Didodecyl 3,3'-thiodipropionate oxide |
| 553.3927 | 530.4   | -0.003  | 553.3897 | 38  | 10.8 | Didodecyl 3,3'-thiodipropionate oxide |

|          |         |         |          |     |      |                                       |
|----------|---------|---------|----------|-----|------|---------------------------------------|
| 553.3927 | 530.4   | -0.003  | 553.3897 | 38  | 10.8 | Didodecyl 3,3'-thiodipropionate oxide |
| 553.3927 | 530.4   | -0.003  | 553.3897 | 78  | 14.4 | Didodecyl 3,3'-thiodipropionate oxide |
| 553.3927 | 530.4   | -0.003  | 553.3897 | 77  | 13.8 | Didodecyl 3,3'-thiodipropionate oxide |
| 553.3927 | 530.4   | -0.003  | 553.3897 | 76  | 13.3 | Didodecyl 3,3'-thiodipropionate oxide |
| 97.0774  | 114.104 | 0.0238  | 97.1012  | 28  | 35.8 | Cyclohexanemethanol                   |
| 97.0774  | 114.104 | 0.0238  | 97.1012  | 23  | 35.8 | Cyclohexanemethanol                   |
| 97.0774  | 114.104 | 0.0238  | 97.1012  | 21  | 27.4 | Cyclohexanol, 4-methyl-, trans-       |
| 97.0774  | 114.104 | 0.0238  | 97.1012  | 29  | 21.7 | Cyclohexanemethanol                   |
| 97.0774  | 114.104 | 0.0238  | 97.1012  | 26  | 21.7 | Cyclohexanemethanol                   |
| 97.0774  | 114.104 | 0.0238  | 97.1012  | 26  | 19.2 | Cyclohexanol, 4-methyl-, trans-       |
| 531.4089 | 530.4   | -0.0011 | 531.4078 | 358 | 19.2 | Didodecyl 3,3'-thiodipropionate oxide |
| 531.4089 | 530.4   | -0.0011 | 531.4078 | 356 | 17.7 | Didodecyl 3,3'-thiodipropionate oxide |
| 531.4089 | 530.4   | -0.0011 | 531.4078 | 355 | 17   | Didodecyl 3,3'-thiodipropionate oxide |
| 531.4089 | 530.4   | -0.0011 | 531.4078 | 367 | 23.2 | Didodecyl 3,3'-thiodipropionate oxide |
| 531.4089 | 530.4   | -0.0011 | 531.4078 | 360 | 17.8 | Didodecyl 3,3'-thiodipropionate oxide |
| 531.4089 | 530.4   | -0.0011 | 531.4078 | 352 | 13.2 | Didodecyl 3,3'-thiodipropionate oxide |
| 531.4089 | 530.4   | -0.0011 | 531.4078 | 241 | 28.3 | Didodecyl 3,3'-thiodipropionate oxide |
| 531.4089 | 530.4   | -0.0011 | 531.4078 | 238 | 25   | Didodecyl 3,3'-thiodipropionate oxide |
| 531.4089 | 530.4   | -0.0011 | 531.4078 | 220 | 12.9 | Didodecyl 3,3'-thiodipropionate oxide |
| 531.4089 | 530.4   | -0.0011 | 531.4078 | 259 | 28.1 | Didodecyl 3,3'-thiodipropionate oxide |
| 531.4089 | 530.4   | -0.0011 | 531.4078 | 258 | 27   | Didodecyl 3,3'-thiodipropionate oxide |
| 531.4089 | 530.4   | -0.0011 | 531.4078 | 236 | 10.7 | Didodecyl 3,3'-thiodipropionate oxide |
| 106.0872 | 105     | 0       | 106.09   | 149 | 77.9 | Diethanolamine                        |
| 106.0872 | 105.079 | -0.0009 | 106.0863 | 120 | 22.1 | Diethanolamine                        |
| 106.0872 | 105.079 | -0.0009 | 106.0863 | 120 | 22.1 | Diethanolamine                        |
| 553.3927 | 530.4   | -0.003  | 553.3897 | 14  | 15.3 | Didodecyl 3,3'-thiodipropionate oxide |
| 553.3927 | 530.4   | -0.003  | 553.3897 | 14  | 15.3 | Didodecyl 3,3'-thiodipropionate oxide |
| 553.3927 | 530.4   | -0.003  | 553.3897 | 13  | 14.7 | Didodecyl 3,3'-thiodipropionate oxide |

|          |         |         |          |     |      |                                       |
|----------|---------|---------|----------|-----|------|---------------------------------------|
| 553.3927 | 530.4   | -0.003  | 553.3897 | 6   | 8.3  | Didodecyl 3,3'-thiodipropionate oxide |
| 553.3927 | 530.4   | -0.003  | 553.3897 | 6   | 8.3  | Didodecyl 3,3'-thiodipropionate oxide |
| 553.3927 | 530.4   | -0.003  | 553.3897 | 5   | 8    | Didodecyl 3,3'-thiodipropionate oxide |
| 553.3927 | 530.4   | -0.003  | 553.3897 | 1   | 20.6 | Didodecyl 3,3'-thiodipropionate oxide |
| 118.0873 | 117.079 | -0.001  | 118.0863 | 177 | 100  | Betaine                               |
| 118.0873 | 117.079 | -0.001  | 118.0863 | 13  | 100  | Betaine                               |
| 118.0873 | 117.079 | -0.001  | 118.0863 | 381 | 62.8 | Betaine                               |
| 118.0873 | 117.079 | -0.001  | 118.0863 | 380 | 62.8 | Betaine                               |
| 118.0873 | 117.079 | -0.001  | 118.0863 | 372 | 62.8 | Betaine                               |
| 118.0873 | 117.079 | -0.001  | 118.0863 | 321 | 98.8 | Betaine                               |
| 118.0873 | 117.079 | -0.001  | 118.0863 | 318 | 98.8 | Betaine                               |
| 118.0873 | 117.079 | -0.001  | 118.0863 | 308 | 98.8 | Betaine                               |
| 118.0873 | 117.079 | -0.001  | 118.0863 | 343 | 37.3 | Betaine                               |
| 118.0873 | 117.079 | -0.001  | 118.0863 | 343 | 37.3 | Betaine                               |
| 118.0873 | 117.079 | -0.001  | 118.0863 | 338 | 37.3 | Betaine                               |
| 531.4089 | 530.4   | -0.0011 | 531.4078 | 317 | 30.4 | Didodecyl 3,3'-thiodipropionate oxide |
| 531.4089 | 530.4   | -0.0011 | 531.4078 | 296 | 12.9 | Didodecyl 3,3'-thiodipropionate oxide |
| 531.4089 | 530.4   | -0.0011 | 531.4078 | 288 | 9.6  | Didodecyl 3,3'-thiodipropionate oxide |
| 531.4089 | 530.4   | -0.0011 | 531.4078 | 269 | 13.2 | Didodecyl 3,3'-thiodipropionate oxide |
| 531.4089 | 530.4   | -0.0011 | 531.4078 | 268 | 12.7 | Didodecyl 3,3'-thiodipropionate oxide |
| 531.4089 | 530.4   | -0.0011 | 531.4078 | 268 | 12.7 | Didodecyl 3,3'-thiodipropionate oxide |
| 531.4089 | 530.4   | -0.0011 | 531.4078 | 227 | 23.9 | Didodecyl 3,3'-thiodipropionate oxide |
| 531.4089 | 530.4   | -0.0011 | 531.4078 | 221 | 18.8 | Didodecyl 3,3'-thiodipropionate oxide |
| 531.4089 | 530.4   | -0.0011 | 531.4078 | 212 | 13.6 | Didodecyl 3,3'-thiodipropionate oxide |
| 531.4089 | 530.4   | -0.0011 | 531.4078 | 218 | 15.9 | Didodecyl 3,3'-thiodipropionate oxide |
| 531.4089 | 530.4   | -0.0011 | 531.4078 | 218 | 15.9 | Didodecyl 3,3'-thiodipropionate oxide |
| 531.4089 | 530.4   | -0.0011 | 531.4078 | 214 | 13.5 | Didodecyl 3,3'-thiodipropionate oxide |
| 97.0774  | 114.104 | 0.0238  | 97.1012  | 71  | 25.7 | Cyclohexanol, 1-methyl-               |
| 97.0774  | 114.104 | 0.0238  | 97.1012  | 59  | 17.1 | Cycloheptanol                         |
| 97.0774  | 114.104 | 0.0238  | 97.1012  | 57  | 15.8 | Cyclohexanemethanol                   |
| 84.0822  | 102.092 | -0.0014 | 84.0808  | 244 | 50   | Betaine aldehyde cation               |

|          |         |         |          |     |      |                                       |
|----------|---------|---------|----------|-----|------|---------------------------------------|
| 84.0822  | 102.092 | -0.0014 | 84.0808  | 244 | 50   | Betaine aldehyde cation               |
| 84.0822  | 102.092 | -0.0014 | 84.0808  | 210 | 51   | Betaine aldehyde cation               |
| 84.0822  | 102.092 | -0.0014 | 84.0808  | 209 | 49   | Betaine aldehyde cation               |
| 186.0588 | 163.084 | 0.0149  | 186.0737 | 137 | 100  | N,N-Bis(2-hydroxyethyl)glycine        |
| 186.0588 | 163.084 | 0.0149  | 186.0737 | 154 | 100  | N,N-Bis(2-hydroxyethyl)glycine        |
| 118.0873 | 117.079 | -0.001  | 118.0863 | 340 | 32.5 | Betaine                               |
| 118.0873 | 117.079 | -0.001  | 118.0863 | 336 | 32.5 | Betaine                               |
| 118.0873 | 117.079 | -0.001  | 118.0863 | 335 | 32.5 | Betaine                               |
| 118.0873 | 117.079 | -0.001  | 118.0863 | 330 | 39.3 | Betaine                               |
| 118.0873 | 117.079 | -0.001  | 118.0863 | 327 | 39.3 | Betaine                               |
| 118.0873 | 117.079 | -0.001  | 118.0863 | 326 | 39.3 | Betaine                               |
| 118.0873 | 117.079 | -0.001  | 118.0863 | 323 | 56.6 | Betaine                               |
| 118.0873 | 117.079 | -0.001  | 118.0863 | 323 | 56.6 | Betaine                               |
| 118.0873 | 117.079 | -0.001  | 118.0863 | 322 | 56.6 | Betaine                               |
| 97.0774  | 114.104 | 0.0238  | 97.1012  | 43  | 26.6 | Cyclohexanol, 1-methyl-               |
| 97.0774  | 114.104 | 0.0238  | 97.1012  | 33  | 18.7 | Cycloheptanol                         |
| 97.0774  | 114.104 | 0.0238  | 97.1012  | 26  | 14.4 | Cyclopentanemethanol, .alpha.-methyl- |
| 106.0872 | 105     | 0       | 106.09   | 152 | 74.8 | Diethanolamine                        |
| 106.0872 | 105.079 | -0.0009 | 106.0863 | 116 | 18.5 | Diethanolamine                        |
| 106.0872 | 105.079 | -0.0009 | 106.0863 | 116 | 18.5 | Diethanolamine                        |
| 553.3927 | 530.4   | -0.003  | 553.3897 | 12  | 9    | Didodecyl 3,3'-thiodipropionate oxide |
| 553.3927 | 530.4   | -0.003  | 553.3897 | 11  | 8.6  | Didodecyl 3,3'-thiodipropionate oxide |
| 553.3927 | 530.4   | -0.003  | 553.3897 | 11  | 8.6  | Didodecyl 3,3'-thiodipropionate oxide |
| 118.0873 | 117.079 | -0.001  | 118.0863 | 378 | 49.4 | Betaine                               |
| 118.0873 | 117.079 | -0.001  | 118.0863 | 374 | 49.4 | Betaine                               |
| 118.0873 | 117.079 | -0.001  | 118.0863 | 371 | 49.4 | Betaine                               |
| 118.0873 | 117.079 | -0.001  | 118.0863 | 321 | 61.3 | Betaine                               |
| 118.0873 | 117.079 | -0.001  | 118.0863 | 318 | 61.3 | Betaine                               |
| 118.0873 | 117.079 | -0.001  | 118.0863 | 316 | 61.3 | Betaine                               |
| 118.0873 | 117.079 | -0.001  | 118.0863 | 304 | 70.8 | Betaine                               |
| 118.0873 | 117.079 | -0.001  | 118.0863 | 302 | 70.8 | Betaine                               |
| 118.0873 | 117.079 | -0.001  | 118.0863 | 300 | 70.8 | Betaine                               |
| 97.0774  | 114.104 | 0.0238  | 97.1012  | 51  | 23.9 | Cyclohexanemethanol                   |
| 97.0774  | 114.104 | 0.0238  | 97.1012  | 51  | 23.9 | Cyclohexanol, 4-methyl-, trans-       |
| 97.0774  | 114.104 | 0.0238  | 97.1012  | 40  | 16.4 | Cyclohexanol, 1-methyl-               |
| 106.0872 | 105     | 0       | 106.09   | 144 | 74.9 | Diethanolamine                        |
| 106.0872 | 105.079 | -0.0009 | 106.0863 | 120 | 25.1 | Diethanolamine                        |
| 106.0872 | 105.079 | -0.0009 | 106.0863 | 117 | 25.1 | Diethanolamine                        |
| 106.0872 | 105     | 0       | 106.09   | 197 | 74.9 | Diethanolamine                        |
| 106.0872 | 105.079 | -0.0009 | 106.0863 | 173 | 25.1 | Diethanolamine                        |
| 106.0872 | 105.079 | -0.0009 | 106.0863 | 173 | 25.1 | Diethanolamine                        |
| 553.3927 | 530.4   | -0.003  | 553.3897 | 70  | 13.7 | Didodecyl 3,3'-thiodipropionate oxide |



|          |         |         |          |     |      |                                       |
|----------|---------|---------|----------|-----|------|---------------------------------------|
| 553.3927 | 530.4   | -0.003  | 553.3897 | 70  | 13.7 | Didodecyl 3,3'-thiodipropionate oxide |
| 553.3927 | 530.4   | -0.003  | 553.3897 | 69  | 13.2 | Didodecyl 3,3'-thiodipropionate oxide |
| 553.3927 | 530.4   | -0.003  | 553.3897 | 57  | 15.6 | Didodecyl 3,3'-thiodipropionate oxide |
| 553.3927 | 530.4   | -0.003  | 553.3897 | 56  | 14.9 | Didodecyl 3,3'-thiodipropionate oxide |
| 553.3927 | 530.4   | -0.003  | 553.3897 | 56  | 14.9 | Didodecyl 3,3'-thiodipropionate oxide |
| 118.0873 | 117.079 | -0.001  | 118.0863 | 365 | 35.7 | Betaine                               |
| 118.0873 | 117.079 | -0.001  | 118.0863 | 365 | 35.7 | Betaine                               |
| 118.0873 | 117.079 | -0.001  | 118.0863 | 363 | 35.7 | Betaine                               |
| 118.0873 | 117.079 | -0.001  | 118.0863 | 374 | 49.7 | Betaine                               |
| 118.0873 | 117.079 | -0.001  | 118.0863 | 373 | 49.7 | Betaine                               |
| 118.0873 | 117.079 | -0.001  | 118.0863 | 369 | 49.7 | Betaine                               |
| 118.0873 | 117.079 | -0.001  | 118.0863 | 351 | 55.1 | Betaine                               |
| 118.0873 | 117.079 | -0.001  | 118.0863 | 347 | 55.1 | Betaine                               |
| 118.0873 | 117.079 | -0.001  | 118.0863 | 344 | 55.1 | Betaine                               |
| 106.0872 | 105     | 0       | 106.09   | 157 | 77.6 | Diethanolamine                        |
| 106.0872 | 105.079 | -0.0009 | 106.0863 | 129 | 22.4 | Diethanolamine                        |
| 106.0872 | 105.079 | -0.0009 | 106.0863 | 128 | 22.4 | Diethanolamine                        |
| 118.0873 | 117.079 | -0.001  | 118.0863 | 263 | 79.3 | Betaine                               |
| 118.0873 | 117.079 | -0.001  | 118.0863 | 259 | 79.3 | Betaine                               |
| 118.0873 | 117.079 | -0.001  | 118.0863 | 252 | 79.3 | Betaine                               |
| 118.0873 | 117.079 | -0.001  | 118.0863 | 357 | 92.1 | Betaine                               |
| 118.0873 | 117.079 | -0.001  | 118.0863 | 353 | 92.1 | Betaine                               |
| 118.0873 | 117.079 | -0.001  | 118.0863 | 351 | 92.1 | Betaine                               |
| 118.0873 | 117.079 | -0.001  | 118.0863 | 285 | 63   | Betaine                               |
| 118.0873 | 117.079 | -0.001  | 118.0863 | 283 | 63   | Betaine                               |
| 118.0873 | 117.079 | -0.001  | 118.0863 | 278 | 63   | Betaine                               |
| 118.0873 | 117.079 | -0.001  | 118.0863 | 342 | 35.6 | Betaine                               |
| 118.0873 | 117.079 | -0.001  | 118.0863 | 339 | 35.6 | Betaine                               |
| 118.0873 | 117.079 | -0.001  | 118.0863 | 336 | 35.6 | Betaine                               |
| 97.0774  | 114.104 | 0.0238  | 97.1012  | 87  | 21.1 | Cyclohexanol, 1-methyl-               |
| 97.0774  | 114.104 | 0.0238  | 97.1012  | 87  | 21.1 | Cyclohexanemethanol                   |
| 97.0774  | 114.104 | 0.0238  | 97.1012  | 86  | 20.3 | Cyclohexanol, 4-methyl-, trans-       |
| 106.0872 | 105     | 0       | 106.09   | 165 | 74.5 | Diethanolamine                        |
| 106.0872 | 105.079 | -0.0009 | 106.0863 | 133 | 19.9 | Diethanolamine                        |
| 106.0872 | 105.079 | -0.0009 | 106.0863 | 132 | 19.9 | Diethanolamine                        |
| 106.0872 | 105     | 0       | 106.09   | 151 | 78.9 | Diethanolamine                        |
| 106.0872 | 105.079 | -0.0009 | 106.0863 | 119 | 21.1 | Diethanolamine                        |
| 106.0872 | 105.079 | -0.0009 | 106.0863 | 118 | 21.1 | Diethanolamine                        |
| 84.0822  | 102.092 | -0.0014 | 84.0808  | 207 | 53.1 | Betaine aldehyde cation               |
| 84.0822  | 102.092 | -0.0014 | 84.0808  | 204 | 46.9 | Betaine aldehyde cation               |
| 84.0822  | 102.092 | -0.0014 | 84.0808  | 183 | 52   | Betaine aldehyde cation               |
| 84.0822  | 102.092 | -0.0014 | 84.0808  | 181 | 48   | Betaine aldehyde cation               |

|          |         |         |          |     |      |                                         |
|----------|---------|---------|----------|-----|------|-----------------------------------------|
| 84.0822  | 102.092 | -0.0014 | 84.0808  | 147 | 52   | Betaine aldehyde cation                 |
| 84.0822  | 102.092 | -0.0014 | 84.0808  | 145 | 48   | Betaine aldehyde cation                 |
| 186.0588 | 163.084 | 0.0149  | 186.0737 | 186 | 95.3 | N,N-Bis(2-hydroxyethyl)glycine          |
| 186.0588 | 370.196 | 0.0467  | 186.1055 | 64  | 4.7  | Ser-His-Lys                             |
| 118.0873 | 117.079 | -0.001  | 118.0863 | 341 | 34.4 | Betaine                                 |
| 118.0873 | 117.079 | -0.001  | 118.0863 | 338 | 34.4 | Betaine                                 |
| 118.0873 | 117.079 | -0.001  | 118.0863 | 337 | 34.4 | Betaine                                 |
| 118.0873 | 117.079 | -0.001  | 118.0863 | 282 | 61.1 | Betaine                                 |
| 118.0873 | 117.079 | -0.001  | 118.0863 | 279 | 61.1 | Betaine                                 |
| 118.0873 | 117.079 | -0.001  | 118.0863 | 275 | 61.1 | Betaine                                 |
| 118.0873 | 117.079 | -0.001  | 118.0863 | 281 | 66   | Betaine                                 |
| 118.0873 | 117.079 | -0.001  | 118.0863 | 279 | 66   | Betaine                                 |
| 118.0873 | 117.079 | -0.001  | 118.0863 | 277 | 66   | Betaine                                 |
| 106.0872 | 105     | 0       | 106.09   | 155 | 75.8 | Diethanolamine                          |
| 106.0872 | 105.079 | -0.0009 | 106.0863 | 117 | 18.2 | Diethanolamine                          |
| 106.0872 | 105.079 | -0.0009 | 106.0863 | 116 | 18.2 | Diethanolamine                          |
| 106.0872 | 105     | 0       | 106.09   | 153 | 80.4 | Diethanolamine                          |
| 106.0872 | 105.079 | -0.0009 | 106.0863 | 116 | 19.6 | Diethanolamine                          |
| 106.0872 | 105.079 | -0.0009 | 106.0863 | 116 | 19.6 | Diethanolamine                          |
| 84.0822  | 102.092 | -0.0014 | 84.0808  | 294 | 53.1 | Betaine aldehyde cation                 |
| 84.0822  | 102.092 | -0.0014 | 84.0808  | 291 | 46.9 | Betaine aldehyde cation                 |
| 84.0822  | 102.092 | -0.0014 | 84.0808  | 218 | 55.4 | Betaine aldehyde cation                 |
| 84.0822  | 102.092 | -0.0014 | 84.0808  | 213 | 44.6 | Betaine aldehyde cation                 |
| 84.0822  | 102.092 | -0.0014 | 84.0808  | 129 | 52   | Betaine aldehyde cation                 |
| 84.0822  | 102.092 | -0.0014 | 84.0808  | 127 | 48   | Betaine aldehyde cation                 |
| 186.0588 | 163.084 | 0.0149  | 186.0737 | 149 | 100  | N,N-Bis(2-hydroxyethyl)glycine          |
| 186.0588 | 370.196 | 0.0467  | 186.1055 | 70  | 100  | Ser-His-Lys                             |
| 186.0588 | 163.084 | 0.0149  | 186.0737 | 166 | 100  | N,N-Bis(2-hydroxyethyl)glycine          |
| 118.0873 | 117.079 | -0.001  | 118.0863 | 389 | 37.7 | Betaine                                 |
| 118.0873 | 117.079 | -0.001  | 118.0863 | 386 | 37.7 | Betaine                                 |
| 118.0873 | 117.079 | -0.001  | 118.0863 | 381 | 37.7 | Betaine                                 |
| 118.0873 | 117.079 | -0.001  | 118.0863 | 248 | 49.5 | Betaine                                 |
| 118.0873 | 117.079 | -0.001  | 118.0863 | 246 | 49.5 | Betaine                                 |
| 118.0873 | 117.079 | -0.001  | 118.0863 | 245 | 49.5 | Betaine                                 |
| 118.0873 | 117.079 | -0.001  | 118.0863 | 312 | 40.1 | Betaine                                 |
| 118.0873 | 117.079 | -0.001  | 118.0863 | 310 | 40.1 | Betaine                                 |
| 118.0873 | 117.079 | -0.001  | 118.0863 | 305 | 40.1 | Betaine                                 |
| 97.0774  | 114.104 | 0.0238  | 97.1012  | 6   | 100  | Cyclopentanemethanol, .alpha.-methyl-   |
| 106.0872 | 105     | 0       | 106.09   | 154 | 74.9 | Diethanolamine                          |
| 106.0872 | 105.079 | -0.0009 | 106.0863 | 120 | 19.2 | Diethanolamine                          |
| 106.0872 | 105.079 | -0.0009 | 106.0863 | 119 | 19.2 | Diethanolamine                          |
| 106.0872 | 105     | 0       | 106.09   | 155 | 78.6 | Diethanolamine                          |
| 106.0872 | 105.079 | -0.0009 | 106.0863 | 124 | 21.4 | Diethanolamine                          |
| 106.0872 | 105.079 | -0.0009 | 106.0863 | 124 | 21.4 | Diethanolamine                          |
| 610.5771 | 610     | -0.04   | 610.54   | 125 | 50   | DG 34:2; [M+NH4]+;<br>DG(14:1/20:1/0:0) |

|          |         |         |          |     |      |                                                      |
|----------|---------|---------|----------|-----|------|------------------------------------------------------|
| 610.5771 | 610     | -0.04   | 610.54   | 125 | 50   | DG 34:2; [M+NH4] <sup>+</sup> ;<br>DG(20:1/14:1/0:0) |
| 610.5771 | 610     | -0.04   | 610.54   | 120 | 50   | DG 34:2; [M+NH4] <sup>+</sup> ;<br>DG(14:1/20:1/0:0) |
| 610.5771 | 610     | -0.04   | 610.54   | 120 | 50   | DG 34:2; [M+NH4] <sup>+</sup> ;<br>DG(20:1/14:1/0:0) |
| 610.5771 | 610     | -0.04   | 610.54   | 81  | 50   | DG 34:2; [M+NH4] <sup>+</sup> ;<br>DG(14:1/20:1/0:0) |
| 610.5771 | 610     | -0.04   | 610.54   | 81  | 50   | DG 34:2; [M+NH4] <sup>+</sup> ;<br>DG(20:1/14:1/0:0) |
| 640.5867 | 640     | 0       | 640.59   | 139 | 50   | DG 36:1; [M+NH4] <sup>+</sup> ;<br>DG(14:1/22:0/0:0) |
| 640.5867 | 640     | 0       | 640.59   | 139 | 50   | DG 36:1; [M+NH4] <sup>+</sup> ;<br>DG(22:0/14:1/0:0) |
| 640.5867 | 640     | 0       | 640.59   | 128 | 50   | DG 36:1; [M+NH4] <sup>+</sup> ;<br>DG(14:1/22:0/0:0) |
| 640.5867 | 640     | 0       | 640.59   | 128 | 50   | DG 36:1; [M+NH4] <sup>+</sup> ;<br>DG(22:0/14:1/0:0) |
| 640.5867 | 640     | 0       | 640.59   | 126 | 50   | DG 36:1; [M+NH4] <sup>+</sup> ;<br>DG(14:1/22:0/0:0) |
| 640.5867 | 640     | 0       | 640.59   | 126 | 50   | DG 36:1; [M+NH4] <sup>+</sup> ;<br>DG(22:0/14:1/0:0) |
| 84.0822  | 102.092 | -0.0014 | 84.0808  | 233 | 54.2 | Betaine aldehyde cation                              |
| 84.0822  | 102.092 | -0.0014 | 84.0808  | 229 | 45.8 | Betaine aldehyde cation                              |
| 84.0822  | 102.092 | -0.0014 | 84.0808  | 193 | 50   | Betaine aldehyde cation                              |
| 84.0822  | 102.092 | -0.0014 | 84.0808  | 193 | 50   | Betaine aldehyde cation                              |
| 186.0588 | 203.091 | 0.0285  | 186.0873 | 82  | 82.7 | Ala-Asn                                              |
| 186.0588 | 163.084 | 0.0149  | 186.0737 | 35  | 17.3 | N,N-Bis(2-hydroxyethyl)glycine                       |
| 186.0588 | 163.084 | 0.0149  | 186.0737 | 158 | 92.5 | N,N-Bis(2-hydroxyethyl)glycine                       |
| 186.0588 | 370.196 | 0.0467  | 186.1055 | 63  | 7.5  | Ser-His-Lys                                          |
| 640.5867 | 640     | 0       | 640.59   | 153 | 50   | DG 36:1; [M+NH4] <sup>+</sup> ;<br>DG(14:1/22:0/0:0) |
| 640.5867 | 640     | 0       | 640.59   | 153 | 50   | DG 36:1; [M+NH4] <sup>+</sup> ;<br>DG(22:0/14:1/0:0) |
| 640.5867 | 640     | 0       | 640.59   | 154 | 50   | DG 36:1; [M+NH4] <sup>+</sup> ;<br>DG(14:1/22:0/0:0) |
| 640.5867 | 640     | 0       | 640.59   | 154 | 50   | DG 36:1; [M+NH4] <sup>+</sup> ;<br>DG(22:0/14:1/0:0) |
| 118.0873 | 117.079 | -0.001  | 118.0863 | 380 | 65.3 | Betaine                                              |
| 118.0873 | 117.079 | -0.001  | 118.0863 | 374 | 65.3 | Betaine                                              |
| 118.0873 | 117.079 | -0.001  | 118.0863 | 368 | 65.3 | Betaine                                              |
| 118.0873 | 117.079 | -0.001  | 118.0863 | 308 | 76.2 | Betaine                                              |
| 118.0873 | 117.079 | -0.001  | 118.0863 | 305 | 76.2 | Betaine                                              |
| 118.0873 | 117.079 | -0.001  | 118.0863 | 299 | 76.2 | Betaine                                              |
| 118.0873 | 117.079 | -0.001  | 118.0863 | 311 | 63.4 | Betaine                                              |
| 118.0873 | 117.079 | -0.001  | 118.0863 | 310 | 63.4 | Betaine                                              |
| 118.0873 | 117.079 | -0.001  | 118.0863 | 309 | 63.4 | Betaine                                              |

|          |         |         |          |     |      |                                                      |
|----------|---------|---------|----------|-----|------|------------------------------------------------------|
| 610.5771 | 610     | -0.04   | 610.54   | 156 | 50   | DG 34:2; [M+NH4] <sup>+</sup> ;<br>DG(14:1/20:1/0:0) |
| 610.5771 | 610     | -0.04   | 610.54   | 156 | 50   | DG 34:2; [M+NH4] <sup>+</sup> ;<br>DG(20:1/14:1/0:0) |
| 636.5935 | 636     | -0.03   | 636.56   | 155 | 50   | DG 36:3; [M+NH4] <sup>+</sup> ;<br>DG(14:1/22:2/0:0) |
| 636.5935 | 636     | -0.03   | 636.56   | 155 | 50   | DG 36:3; [M+NH4] <sup>+</sup> ;<br>DG(22:2/14:1/0:0) |
| 636.5935 | 636     | -0.03   | 636.56   | 155 | 50   | DG 36:3; [M+NH4] <sup>+</sup> ;<br>DG(14:1/22:2/0:0) |
| 636.5935 | 636     | -0.03   | 636.56   | 155 | 50   | DG 36:3; [M+NH4] <sup>+</sup> ;<br>DG(22:2/14:1/0:0) |
| 636.5935 | 636     | -0.03   | 636.56   | 153 | 50   | DG 36:3; [M+NH4] <sup>+</sup> ;<br>DG(14:1/22:2/0:0) |
| 636.5935 | 636     | -0.03   | 636.56   | 153 | 50   | DG 36:3; [M+NH4] <sup>+</sup> ;<br>DG(22:2/14:1/0:0) |
| 97.0774  | 114.104 | 0.0238  | 97.1012  | 45  | 25.8 | Cyclohexanol, 1-methyl-                              |
| 97.0774  | 114.104 | 0.0238  | 97.1012  | 34  | 17.7 | Cycloheptanol                                        |
| 97.0774  | 114.104 | 0.0238  | 97.1012  | 30  | 15   | Cyclohexanemethanol                                  |
| 118.0873 | 117.079 | -0.001  | 118.0863 | 330 | 89.7 | Betaine                                              |
| 118.0873 | 117.079 | -0.001  | 118.0863 | 322 | 89.7 | Betaine                                              |
| 118.0873 | 117.079 | -0.001  | 118.0863 | 308 | 89.7 | Betaine                                              |
| 118.0873 | 117.079 | -0.001  | 118.0863 | 415 | 47   | Betaine                                              |
| 118.0873 | 117.079 | -0.001  | 118.0863 | 410 | 47   | Betaine                                              |
| 118.0873 | 117.079 | -0.001  | 118.0863 | 409 | 47   | Betaine                                              |
| 118.0873 | 117.079 | -0.001  | 118.0863 | 325 | 78.9 | Betaine                                              |
| 118.0873 | 117.079 | -0.001  | 118.0863 | 325 | 78.9 | Betaine                                              |
| 118.0873 | 117.079 | -0.001  | 118.0863 | 318 | 78.9 | Betaine                                              |
| 118.0873 | 117.079 | -0.001  | 118.0863 | 449 | 57.4 | Betaine                                              |
| 118.0873 | 117.079 | -0.001  | 118.0863 | 448 | 57.4 | Betaine                                              |
| 118.0873 | 117.079 | -0.001  | 118.0863 | 442 | 57.4 | Betaine                                              |
| 97.0774  | 114.104 | 0.0238  | 97.1012  | 33  | 26.6 | Cyclohexanemethanol                                  |
| 97.0774  | 114.104 | 0.0238  | 97.1012  | 32  | 26.6 | Cyclohexanemethanol                                  |
| 97.0774  | 114.104 | 0.0238  | 97.1012  | 29  | 22.4 | Cyclohexanol, 4-methyl-, trans-                      |
| 106.0872 | 105     | 0       | 106.09   | 158 | 75.3 | Diethanolamine                                       |
| 106.0872 | 105.079 | -0.0009 | 106.0863 | 120 | 18   | Diethanolamine                                       |
| 106.0872 | 105.079 | -0.0009 | 106.0863 | 120 | 18   | Diethanolamine                                       |
| 84.0822  | 102.092 | -0.0014 | 84.0808  | 258 | 51   | Betaine aldehyde cation                              |
| 84.0822  | 102.092 | -0.0014 | 84.0808  | 257 | 49   | Betaine aldehyde cation                              |
| 84.0822  | 102.092 | -0.0014 | 84.0808  | 206 | 53.1 | Betaine aldehyde cation                              |
| 84.0822  | 102.092 | -0.0014 | 84.0808  | 203 | 46.9 | Betaine aldehyde cation                              |
| 84.0822  | 102.092 | -0.0014 | 84.0808  | 182 | 56   | Betaine aldehyde cation                              |
| 84.0822  | 102.092 | -0.0014 | 84.0808  | 176 | 44   | Betaine aldehyde cation                              |
| 118.0873 | 117.079 | -0.001  | 118.0863 | 298 | 40.2 | Betaine                                              |
| 118.0873 | 117.079 | -0.001  | 118.0863 | 298 | 40.2 | Betaine                                              |
| 118.0873 | 117.079 | -0.001  | 118.0863 | 295 | 40.2 | Betaine                                              |
| 118.0873 | 117.079 | -0.001  | 118.0863 | 281 | 58   | Betaine                                              |

|          |         |         |          |     |      |                                         |
|----------|---------|---------|----------|-----|------|-----------------------------------------|
| 118.0873 | 117.079 | -0.001  | 118.0863 | 278 | 58   | Betaine                                 |
| 118.0873 | 117.079 | -0.001  | 118.0863 | 278 | 58   | Betaine                                 |
| 118.0873 | 117.079 | -0.001  | 118.0863 | 355 | 40.5 | Betaine                                 |
| 118.0873 | 117.079 | -0.001  | 118.0863 | 352 | 40.5 | Betaine                                 |
| 118.0873 | 117.079 | -0.001  | 118.0863 | 351 | 40.5 | Betaine                                 |
| 106.0872 | 105     | 0       | 106.09   | 157 | 74.9 | Diethanolamine                          |
| 106.0872 | 105.079 | -0.0009 | 106.0863 | 133 | 25.1 | Diethanolamine                          |
| 106.0872 | 105.079 | -0.0009 | 106.0863 | 132 | 25.1 | Diethanolamine                          |
| 106.0872 | 105     | 0       | 106.09   | 159 | 80.2 | Diethanolamine                          |
| 106.0872 | 105.079 | -0.0009 | 106.0863 | 123 | 19.8 | Diethanolamine                          |
| 106.0872 | 105.079 | -0.0009 | 106.0863 | 123 | 19.8 | Diethanolamine                          |
| 106.0872 | 105.079 | -0.0009 | 106.0863 | 150 | 100  | Diethanolamine                          |
| 106.0872 | 105.079 | -0.0009 | 106.0863 | 149 | 100  | Diethanolamine                          |
| 106.0872 | 105.079 | -0.0009 | 106.0863 | 148 | 100  | Diethanolamine                          |
| 666.6035 | 666     | 0       | 666.6    | 158 | 50   | DG 38:2; [M+NH4]+;<br>DG(14:1/24:1/0:0) |
| 666.6035 | 666     | 0       | 666.6    | 158 | 50   | DG 38:2; [M+NH4]+;<br>DG(24:1/14:1/0:0) |
| 666.6035 | 666     | 0       | 666.6    | 151 | 50   | DG 38:2; [M+NH4]+;<br>DG(14:1/24:1/0:0) |
| 666.6035 | 666     | 0       | 666.6    | 151 | 50   | DG 38:2; [M+NH4]+;<br>DG(24:1/14:1/0:0) |
| 186.0588 | 163.084 | 0.0149  | 186.0737 | 132 | 87.8 | N,N-Bis(2-hydroxyethyl)glycine          |
| 186.0588 | 370.196 | 0.0467  | 186.1055 | 60  | 12.2 | Ser-His-Lys                             |
| 186.0588 | 163.084 | 0.0149  | 186.0737 | 167 | 100  | N,N-Bis(2-hydroxyethyl)glycine          |
| 106.0872 | 105     | 0       | 106.09   | 156 | 79.6 | Diethanolamine                          |
| 106.0872 | 105.079 | -0.0009 | 106.0863 | 122 | 20.4 | Diethanolamine                          |
| 106.0872 | 105.079 | -0.0009 | 106.0863 | 121 | 20.4 | Diethanolamine                          |
| 106.0872 | 105     | 0       | 106.09   | 183 | 73.2 | Diethanolamine                          |
| 106.0872 | 105.079 | -0.0009 | 106.0863 | 160 | 26.8 | Diethanolamine                          |
| 106.0872 | 105.079 | -0.0009 | 106.0863 | 159 | 26.8 | Diethanolamine                          |
| 84.0822  | 102.092 | -0.0014 | 84.0808  | 258 | 51   | Betaine aldehyde cation                 |
| 84.0822  | 102.092 | -0.0014 | 84.0808  | 257 | 49   | Betaine aldehyde cation                 |
| 84.0822  | 102.092 | -0.0014 | 84.0808  | 256 | 52   | Betaine aldehyde cation                 |
| 84.0822  | 102.092 | -0.0014 | 84.0808  | 254 | 48   | Betaine aldehyde cation                 |
| 84.0822  | 102.092 | -0.0014 | 84.0808  | 141 | 53.1 | Betaine aldehyde cation                 |
| 84.0822  | 102.092 | -0.0014 | 84.0808  | 138 | 46.9 | Betaine aldehyde cation                 |
| 118.0873 | 117.079 | -0.001  | 118.0863 | 234 | 100  | Betaine                                 |
| 118.0873 | 117.079 | -0.001  | 118.0863 | 227 | 100  | Betaine                                 |
| 118.0873 | 117.079 | -0.001  | 118.0863 | 170 | 100  | Betaine                                 |
| 118.0873 | 117.079 | -0.001  | 118.0863 | 381 | 47.3 | Betaine                                 |
| 118.0873 | 117.079 | -0.001  | 118.0863 | 380 | 47.3 | Betaine                                 |
| 118.0873 | 117.079 | -0.001  | 118.0863 | 376 | 47.3 | Betaine                                 |
| 118.0873 | 117.079 | -0.001  | 118.0863 | 321 | 98.8 | Betaine                                 |
| 118.0873 | 117.079 | -0.001  | 118.0863 | 317 | 98.8 | Betaine                                 |
| 118.0873 | 117.079 | -0.001  | 118.0863 | 306 | 98.8 | Betaine                                 |
| 118.0873 | 117.079 | -0.001  | 118.0863 | 339 | 58.7 | Betaine                                 |

|          |         |         |          |     |      |                                         |
|----------|---------|---------|----------|-----|------|-----------------------------------------|
| 118.0873 | 117.079 | -0.001  | 118.0863 | 338 | 58.7 | Betaine                                 |
| 118.0873 | 117.079 | -0.001  | 118.0863 | 337 | 58.7 | Betaine                                 |
| 97.0774  | 114.104 | 0.0238  | 97.1012  | 39  | 24.1 | Cyclohexanol, 4-methyl-, trans-         |
| 97.0774  | 114.104 | 0.0238  | 97.1012  | 34  | 19.5 | Cyclohexanol, 2-methyl-, trans-         |
| 97.0774  | 114.104 | 0.0238  | 97.1012  | 31  | 17.2 | Cyclohexanemethanol                     |
| 186.0588 | 370.196 | 0.0467  | 186.1055 | 62  | 100  | Ser-His-Lys                             |
| 186.0588 | 370.196 | 0.0467  | 186.1055 | 44  | 100  | Ser-His-Lys                             |
| 624.5931 | 624     | -0.03   | 624.56   | 160 | 50   | DG 35:2; [M+NH4]+;<br>DG(15:1/20:1/0:0) |
| 624.5931 | 624     | -0.03   | 624.56   | 160 | 50   | DG 35:2; [M+NH4]+;<br>DG(20:1/15:1/0:0) |
| 118.0873 | 117.079 | -0.001  | 118.0863 | 378 | 45.4 | Betaine                                 |
| 118.0873 | 117.079 | -0.001  | 118.0863 | 376 | 45.4 | Betaine                                 |
| 118.0873 | 117.079 | -0.001  | 118.0863 | 370 | 45.4 | Betaine                                 |
| 118.0873 | 117.079 | -0.001  | 118.0863 | 296 | 65.5 | Betaine                                 |
| 118.0873 | 117.079 | -0.001  | 118.0863 | 293 | 65.5 | Betaine                                 |
| 118.0873 | 117.079 | -0.001  | 118.0863 | 291 | 65.5 | Betaine                                 |
| 118.0873 | 117.079 | -0.001  | 118.0863 | 332 | 41.1 | Betaine                                 |
| 118.0873 | 117.079 | -0.001  | 118.0863 | 331 | 41.1 | Betaine                                 |
| 118.0873 | 117.079 | -0.001  | 118.0863 | 329 | 41.1 | Betaine                                 |
| 106.0872 | 105     | 0       | 106.09   | 174 | 75   | Diethanolamine                          |
| 106.0872 | 105.079 | -0.0009 | 106.0863 | 128 | 15.8 | Diethanolamine                          |
| 106.0872 | 105.079 | -0.0009 | 106.0863 | 127 | 15.8 | Diethanolamine                          |
| 106.0872 | 105     | 0       | 106.09   | 159 | 75.2 | Diethanolamine                          |
| 106.0872 | 105.079 | -0.0009 | 106.0863 | 126 | 19.7 | Diethanolamine                          |
| 106.0872 | 105.079 | -0.0009 | 106.0863 | 125 | 19.7 | Diethanolamine                          |
| 118.0873 | 117.079 | -0.001  | 118.0863 | 333 | 64.5 | Betaine                                 |
| 118.0873 | 117.079 | -0.001  | 118.0863 | 329 | 64.5 | Betaine                                 |
| 118.0873 | 117.079 | -0.001  | 118.0863 | 321 | 64.5 | Betaine                                 |
| 118.0873 | 117.079 | -0.001  | 118.0863 | 381 | 26.9 | Betaine                                 |
| 118.0873 | 117     | 0       | 118.09   | 380 | 25.9 | Betaine                                 |
| 118.0873 | 117.079 | -0.001  | 118.0863 | 379 | 26.9 | Betaine                                 |
| 118.0873 | 117.079 | -0.001  | 118.0863 | 283 | 62.8 | Betaine                                 |
| 118.0873 | 117.079 | -0.001  | 118.0863 | 282 | 62.8 | Betaine                                 |
| 118.0873 | 117.079 | -0.001  | 118.0863 | 278 | 62.8 | Betaine                                 |
| 118.0873 | 117.079 | -0.001  | 118.0863 | 330 | 45.2 | Betaine                                 |
| 118.0873 | 117.079 | -0.001  | 118.0863 | 327 | 45.2 | Betaine                                 |
| 118.0873 | 117.079 | -0.001  | 118.0863 | 324 | 45.2 | Betaine                                 |
| 106.0872 | 105     | 0       | 106.09   | 167 | 77.3 | Diethanolamine                          |
| 106.0872 | 105.079 | -0.0009 | 106.0863 | 140 | 22.7 | Diethanolamine                          |
| 106.0872 | 105.079 | -0.0009 | 106.0863 | 138 | 22.7 | Diethanolamine                          |
| 106.0872 | 105     | 0       | 106.09   | 158 | 80.2 | Diethanolamine                          |
| 106.0872 | 105.079 | -0.0009 | 106.0863 | 122 | 19.8 | Diethanolamine                          |
| 106.0872 | 105.079 | -0.0009 | 106.0863 | 122 | 19.8 | Diethanolamine                          |
| 84.0822  | 102.092 | -0.0014 | 84.0808  | 274 | 50   | Betaine aldehyde cation                 |
| 84.0822  | 102.092 | -0.0014 | 84.0808  | 274 | 50   | Betaine aldehyde cation                 |
| 84.0822  | 102.092 | -0.0014 | 84.0808  | 216 | 52   | Betaine aldehyde cation                 |

|          |         |         |          |     |      |                                                      |
|----------|---------|---------|----------|-----|------|------------------------------------------------------|
| 84.0822  | 102.092 | -0.0014 | 84.0808  | 214 | 48   | Betaine aldehyde cation                              |
| 84.0822  | 102.092 | -0.0014 | 84.0808  | 162 | 52   | Betaine aldehyde cation                              |
| 84.0822  | 102.092 | -0.0014 | 84.0808  | 160 | 48   | Betaine aldehyde cation                              |
| 106.0872 | 105.079 | -0.0009 | 106.0863 | 113 | 100  | Diethanolamine                                       |
| 106.0872 | 105.079 | -0.0009 | 106.0863 | 111 | 100  | Diethanolamine                                       |
| 106.0872 | 105.079 | -0.0009 | 106.0863 | 107 | 100  | Diethanolamine                                       |
| 186.0588 | 370.196 | 0.0467  | 186.1055 | 46  | 100  | Ser-His-Lys                                          |
| 186.0588 | 370.196 | 0.0467  | 186.1055 | 60  | 61.5 | Ser-His-Lys                                          |
| 186.0588 | 370.196 | 0.0467  | 186.1055 | 46  | 38.5 | Ser-His-Lys                                          |
| 84.0822  | 102.092 | -0.0014 | 84.0808  | 257 | 52   | Betaine aldehyde cation                              |
| 84.0822  | 102.092 | -0.0014 | 84.0808  | 255 | 48   | Betaine aldehyde cation                              |
| 84.0822  | 102.092 | -0.0014 | 84.0808  | 204 | 52   | Betaine aldehyde cation                              |
| 84.0822  | 102.092 | -0.0014 | 84.0808  | 202 | 48   | Betaine aldehyde cation                              |
| 118.0873 | 117.079 | -0.001  | 118.0863 | 295 | 48.9 | Betaine                                              |
| 118.0873 | 117.079 | -0.001  | 118.0863 | 292 | 48.9 | Betaine                                              |
| 118.0873 | 117.079 | -0.001  | 118.0863 | 291 | 48.9 | Betaine                                              |
| 118.0873 | 117.079 | -0.001  | 118.0863 | 417 | 63.4 | Betaine                                              |
| 118.0873 | 117.079 | -0.001  | 118.0863 | 412 | 63.4 | Betaine                                              |
| 118.0873 | 117.079 | -0.001  | 118.0863 | 405 | 63.4 | Betaine                                              |
| 118.0873 | 117.079 | -0.001  | 118.0863 | 254 | 100  | Betaine                                              |
| 118.0873 | 117.079 | -0.001  | 118.0863 | 253 | 100  | Betaine                                              |
| 118.0873 | 117.079 | -0.001  | 118.0863 | 250 | 100  | Betaine                                              |
| 118.0873 | 117.079 | -0.001  | 118.0863 | 325 | 37.9 | Betaine                                              |
| 118.0873 | 117.079 | -0.001  | 118.0863 | 323 | 37.9 | Betaine                                              |
| 118.0873 | 117.079 | -0.001  | 118.0863 | 320 | 37.9 | Betaine                                              |
| 84.0822  | 102.092 | -0.0014 | 84.0808  | 223 | 50   | Betaine aldehyde cation                              |
| 84.0822  | 102.092 | -0.0014 | 84.0808  | 223 | 50   | Betaine aldehyde cation                              |
| 84.0822  | 102.092 | -0.0014 | 84.0808  | 201 | 51   | Betaine aldehyde cation                              |
| 84.0822  | 102.092 | -0.0014 | 84.0808  | 200 | 49   | Betaine aldehyde cation                              |
| 186.0588 | 203.091 | 0.0285  | 186.0873 | 62  | 100  | Ala-Asn                                              |
| 186.0588 | 163.084 | 0.0149  | 186.0737 | 139 | 100  | N,N-Bis(2-hydroxyethyl)glycine                       |
| 186.0588 | 163.084 | 0.0149  | 186.0737 | 137 | 88.8 | N,N-Bis(2-hydroxyethyl)glycine                       |
| 186.0588 | 370.196 | 0.0467  | 186.1055 | 61  | 11.2 | Ser-His-Lys                                          |
| 118.0873 | 117.079 | -0.001  | 118.0863 | 383 | 35.5 | Betaine                                              |
| 118.0873 | 117.079 | -0.001  | 118.0863 | 382 | 35.5 | Betaine                                              |
| 118.0873 | 117.079 | -0.001  | 118.0863 | 381 | 35.5 | Betaine                                              |
| 118.0873 | 117.079 | -0.001  | 118.0863 | 251 | 56.8 | Betaine                                              |
| 118.0873 | 117.079 | -0.001  | 118.0863 | 249 | 56.8 | Betaine                                              |
| 118.0873 | 117.079 | -0.001  | 118.0863 | 248 | 56.8 | Betaine                                              |
| 118.0873 | 117.079 | -0.001  | 118.0863 | 279 | 61.9 | Betaine                                              |
| 118.0873 | 117.079 | -0.001  | 118.0863 | 279 | 61.9 | Betaine                                              |
| 118.0873 | 117.079 | -0.001  | 118.0863 | 276 | 61.9 | Betaine                                              |
| 97.0774  | 114.104 | 0.0238  | 97.1012  | 36  | 24.5 | Cyclohexanol, 1-methyl-                              |
| 97.0774  | 114.104 | 0.0238  | 97.1012  | 27  | 17.8 | Cycloheptanol                                        |
| 97.0774  | 114.104 | 0.0238  | 97.1012  | 23  | 15   | Cyclohexanemethanol                                  |
| 638.6087 | 638     | -0.04   | 638.57   | 141 | 29.6 | DG 36:2; [M+NH4] <sup>+</sup> ;<br>DG(14:1/22:1/0:0) |

|          |     |       |        |     |      |                                                      |
|----------|-----|-------|--------|-----|------|------------------------------------------------------|
| 638.6087 | 638 | -0.04 | 638.57 | 141 | 29.6 | DG 36:2; [M+NH4] <sup>+</sup> ;<br>DG(22:1/14:1/0:0) |
| 638.6087 | 638 | -0.04 | 638.57 | 130 | 20.3 | DG 36:2; [M+NH4] <sup>+</sup> ;<br>DG(16:1/20:1/0:0) |
| 638.6087 | 638 | -0.04 | 638.57 | 129 | 31.7 | DG 36:2; [M+NH4] <sup>+</sup> ;<br>DG(16:1/20:1/0:0) |
| 638.6087 | 638 | -0.04 | 638.57 | 129 | 31.7 | DG 36:2; [M+NH4] <sup>+</sup> ;<br>DG(20:1/16:1/0:0) |
| 638.6087 | 638 | -0.04 | 638.57 | 113 | 18.3 | DG 36:2; [M+NH4] <sup>+</sup> ;<br>DG(14:1/22:1/0:0) |
| 638.6087 | 638 | -0.04 | 638.57 | 140 | 28   | DG 36:2; [M+NH4] <sup>+</sup> ;<br>DG(16:1/20:1/0:0) |
| 638.6087 | 638 | -0.04 | 638.57 | 140 | 28   | DG 36:2; [M+NH4] <sup>+</sup> ;<br>DG(20:1/16:1/0:0) |
| 638.6087 | 638 | -0.04 | 638.57 | 134 | 22   | DG 36:2; [M+NH4] <sup>+</sup> ;<br>DG(14:1/22:1/0:0) |
| 638.6087 | 638 | -0.04 | 638.57 | 128 | 28   | DG 36:2; [M+NH4] <sup>+</sup> ;<br>DG(14:1/22:1/0:0) |
| 638.6087 | 638 | -0.04 | 638.57 | 128 | 28   | DG 36:2; [M+NH4] <sup>+</sup> ;<br>DG(22:1/14:1/0:0) |
| 638.6087 | 638 | -0.04 | 638.57 | 122 | 22   | DG 36:2; [M+NH4] <sup>+</sup> ;<br>DG(16:1/20:1/0:0) |
| 638.6087 | 638 | -0.04 | 638.57 | 160 | 50   | DG 36:2; [M+NH4] <sup>+</sup> ;<br>DG(14:1/22:1/0:0) |
| 638.6087 | 638 | -0.04 | 638.57 | 160 | 50   | DG 36:2; [M+NH4] <sup>+</sup> ;<br>DG(22:1/14:1/0:0) |
| 638.6087 | 638 | -0.04 | 638.57 | 151 | 25.5 | DG 36:2; [M+NH4] <sup>+</sup> ;<br>DG(16:1/20:1/0:0) |
| 638.6087 | 638 | -0.04 | 638.57 | 151 | 25.5 | DG 36:2; [M+NH4] <sup>+</sup> ;<br>DG(20:1/16:1/0:0) |
| 638.6087 | 638 | -0.04 | 638.57 | 150 | 24.5 | DG 36:2; [M+NH4] <sup>+</sup> ;<br>DG(14:1/22:1/0:0) |
| 638.6087 | 638 | -0.04 | 638.57 | 147 | 29.3 | DG 36:2; [M+NH4] <sup>+</sup> ;<br>DG(16:1/20:1/0:0) |
| 638.6087 | 638 | -0.04 | 638.57 | 147 | 29.3 | DG 36:2; [M+NH4] <sup>+</sup> ;<br>DG(20:1/16:1/0:0) |
| 638.6087 | 638 | -0.04 | 638.57 | 137 | 20.7 | DG 36:2; [M+NH4] <sup>+</sup> ;<br>DG(14:1/22:1/0:0) |
| 638.6087 | 638 | -0.04 | 638.57 | 139 | 26   | DG 36:2; [M+NH4] <sup>+</sup> ;<br>DG(16:1/20:1/0:0) |
| 638.6087 | 638 | -0.04 | 638.57 | 139 | 26   | DG 36:2; [M+NH4] <sup>+</sup> ;<br>DG(20:1/16:1/0:0) |
| 638.6087 | 638 | -0.04 | 638.57 | 137 | 24   | DG 36:2; [M+NH4] <sup>+</sup> ;<br>DG(14:1/22:1/0:0) |
| 668.6187 | 668 | 0     | 668.62 | 152 | 31.7 | DG 38:1; [M+NH4] <sup>+</sup> ;<br>DG(14:1/24:0/0:0) |



|          |         |         |          |     |      |                                                      |
|----------|---------|---------|----------|-----|------|------------------------------------------------------|
| 668.6187 | 668     | 0       | 668.62   | 152 | 31.7 | DG 38:1; [M+NH4] <sup>+</sup> ;<br>DG(24:0/14:1/0:0) |
| 668.6187 | 668     | 0       | 668.62   | 136 | 18.3 | DG 38:1; [M+NH4] <sup>+</sup> ;<br>DG(16:1/22:0/0:0) |
| 668.6187 | 668     | 0       | 668.62   | 141 | 32.3 | DG 38:1; [M+NH4] <sup>+</sup> ;<br>DG(16:1/22:0/0:0) |
| 668.6187 | 668     | 0       | 668.62   | 141 | 32.3 | DG 38:1; [M+NH4] <sup>+</sup> ;<br>DG(22:0/16:1/0:0) |
| 668.6187 | 668     | 0       | 668.62   | 124 | 17.6 | DG 38:1; [M+NH4] <sup>+</sup> ;<br>DG(14:1/24:0/0:0) |
| 118.0873 | 117.079 | -0.001  | 118.0863 | 308 | 70.7 | Betaine                                              |
| 118.0873 | 117.079 | -0.001  | 118.0863 | 303 | 70.7 | Betaine                                              |
| 118.0873 | 117.079 | -0.001  | 118.0863 | 300 | 70.7 | Betaine                                              |
| 118.0873 | 117.079 | -0.001  | 118.0863 | 316 | 61.7 | Betaine                                              |
| 118.0873 | 117.079 | -0.001  | 118.0863 | 312 | 61.7 | Betaine                                              |
| 118.0873 | 117.079 | -0.001  | 118.0863 | 312 | 61.7 | Betaine                                              |
| 118.0873 | 117.079 | -0.001  | 118.0863 | 329 | 78   | Betaine                                              |
| 118.0873 | 117.079 | -0.001  | 118.0863 | 328 | 78   | Betaine                                              |
| 118.0873 | 117.079 | -0.001  | 118.0863 | 317 | 78   | Betaine                                              |
| 118.0873 | 117.079 | -0.001  | 118.0863 | 327 | 63.5 | Betaine                                              |
| 118.0873 | 117.079 | -0.001  | 118.0863 | 327 | 63.5 | Betaine                                              |
| 118.0873 | 117.079 | -0.001  | 118.0863 | 322 | 63.5 | Betaine                                              |
| 97.0774  | 114.104 | 0.0238  | 97.1012  | 27  | 23.1 | Cyclohexanol, 1-methyl-                              |
| 97.0774  | 114.104 | 0.0238  | 97.1012  | 19  | 17.2 | Cycloheptanol                                        |
| 97.0774  | 114.104 | 0.0238  | 97.1012  | 16  | 15.2 | Cyclopentanemethanol, .alpha.-methyl-                |
| 106.0872 | 105     | 0       | 106.09   | 156 | 80.7 | Diethanolamine                                       |
| 106.0872 | 105.079 | -0.0009 | 106.0863 | 118 | 19.3 | Diethanolamine                                       |
| 106.0872 | 105.079 | -0.0009 | 106.0863 | 117 | 19.3 | Diethanolamine                                       |
| 106.0872 | 105     | 0       | 106.09   | 168 | 75.8 | Diethanolamine                                       |
| 106.0872 | 105.079 | -0.0009 | 106.0863 | 142 | 22.7 | Diethanolamine                                       |
| 106.0872 | 105.079 | -0.0009 | 106.0863 | 141 | 22.7 | Diethanolamine                                       |
| 106.0872 | 105.079 | -0.0009 | 106.0863 | 117 | 100  | Diethanolamine                                       |
| 106.0872 | 105.079 | -0.0009 | 106.0863 | 115 | 100  | Diethanolamine                                       |
| 106.0872 | 105.079 | -0.0009 | 106.0863 | 105 | 100  | Diethanolamine                                       |
| 638.6087 | 638     | -0.04   | 638.57   | 157 | 38.5 | DG 36:2; [M+NH4] <sup>+</sup> ;<br>DG(14:1/22:1/0:0) |
| 638.6087 | 638     | -0.04   | 638.57   | 157 | 38.5 | DG 36:2; [M+NH4] <sup>+</sup> ;<br>DG(22:1/14:1/0:0) |
| 638.6087 | 638     | -0.04   | 638.57   | 131 | 11.5 | DG 36:2; [M+NH4] <sup>+</sup> ;<br>DG(16:1/20:1/0:0) |
| 638.6087 | 638     | -0.04   | 638.57   | 157 | 26   | DG 36:2; [M+NH4] <sup>+</sup> ;<br>DG(16:1/20:1/0:0) |
| 638.6087 | 638     | -0.04   | 638.57   | 157 | 26   | DG 36:2; [M+NH4] <sup>+</sup> ;<br>DG(20:1/16:1/0:0) |
| 638.6087 | 638     | -0.04   | 638.57   | 155 | 24   | DG 36:2; [M+NH4] <sup>+</sup> ;<br>DG(14:1/22:1/0:0) |

|          |         |         |          |     |      |                                         |
|----------|---------|---------|----------|-----|------|-----------------------------------------|
| 668.6187 | 668     | 0       | 668.62   | 151 | 31.7 | DG 38:1; [M+NH4]+;<br>DG(14:1/24:0/0:0) |
| 668.6187 | 668     | 0       | 668.62   | 151 | 31.7 | DG 38:1; [M+NH4]+;<br>DG(24:0/14:1/0:0) |
| 668.6187 | 668     | 0       | 668.62   | 135 | 18.3 | DG 38:1; [M+NH4]+;<br>DG(16:1/22:0/0:0) |
| 668.6187 | 668     | 0       | 668.62   | 149 | 35.1 | DG 38:1; [M+NH4]+;<br>DG(16:1/22:0/0:0) |
| 668.6187 | 668     | 0       | 668.62   | 149 | 35.1 | DG 38:1; [M+NH4]+;<br>DG(22:0/16:1/0:0) |
| 668.6187 | 668     | 0       | 668.62   | 128 | 14.9 | DG 38:1; [M+NH4]+;<br>DG(14:1/24:0/0:0) |
| 668.6187 | 668     | 0       | 668.62   | 137 | 39   | DG 38:1; [M+NH4]+;<br>DG(14:1/24:0/0:0) |
| 668.6187 | 668     | 0       | 668.62   | 137 | 39   | DG 38:1; [M+NH4]+;<br>DG(24:0/14:1/0:0) |
| 668.6187 | 668     | 0       | 668.62   | 108 | 11   | DG 38:1; [M+NH4]+;<br>DG(16:1/22:0/0:0) |
| 664.6234 | 664     | -0.03   | 664.59   | 142 | 50   | DG 38:3; [M+NH4]+;<br>DG(16:1/22:2/0:0) |
| 664.6234 | 664     | -0.03   | 664.59   | 142 | 50   | DG 38:3; [M+NH4]+;<br>DG(22:2/16:1/0:0) |
| 664.6234 | 664     | -0.03   | 664.59   | 157 | 50   | DG 38:3; [M+NH4]+;<br>DG(16:1/22:2/0:0) |
| 664.6234 | 664     | -0.03   | 664.59   | 157 | 50   | DG 38:3; [M+NH4]+;<br>DG(22:2/16:1/0:0) |
| 664.6234 | 664     | -0.03   | 664.59   | 150 | 50   | DG 38:3; [M+NH4]+;<br>DG(16:1/22:2/0:0) |
| 664.6234 | 664     | -0.03   | 664.59   | 150 | 50   | DG 38:3; [M+NH4]+;<br>DG(22:2/16:1/0:0) |
| 106.0872 | 105     | 0       | 106.09   | 169 | 80.9 | Diethanolamine                          |
| 106.0872 | 105.079 | -0.0009 | 106.0863 | 130 | 19.1 | Diethanolamine                          |
| 106.0872 | 105.079 | -0.0009 | 106.0863 | 129 | 19.1 | Diethanolamine                          |
| 106.0872 | 105.079 | -0.0009 | 106.0863 | 125 | 100  | Diethanolamine                          |
| 106.0872 | 105.079 | -0.0009 | 106.0863 | 124 | 100  | Diethanolamine                          |
| 106.0872 | 105.079 | -0.0009 | 106.0863 | 123 | 100  | Diethanolamine                          |
| 84.0822  | 102.092 | -0.0014 | 84.0808  | 236 | 53.1 | Betaine aldehyde cation                 |
| 84.0822  | 102.092 | -0.0014 | 84.0808  | 233 | 46.9 | Betaine aldehyde cation                 |
| 84.0822  | 102.092 | -0.0014 | 84.0808  | 223 | 51   | Betaine aldehyde cation                 |
| 84.0822  | 102.092 | -0.0014 | 84.0808  | 222 | 49   | Betaine aldehyde cation                 |
| 84.0822  | 102.092 | -0.0014 | 84.0808  | 117 | 54.2 | Betaine aldehyde cation                 |
| 84.0822  | 102.092 | -0.0014 | 84.0808  | 113 | 45.8 | Betaine aldehyde cation                 |
| 186.0588 | 163.084 | 0.0149  | 186.0737 | 181 | 88.4 | N,N-Bis(2-hydroxyethyl)glycine          |
| 186.0588 | 163.084 | 0.0149  | 186.0737 | 141 | 88.4 | N,N-Bis(2-hydroxyethyl)glycine          |
| 186.0588 | 370.196 | 0.0467  | 186.1055 | 76  | 6    | Ser-His-Lys                             |
| 664.6234 | 664     | -0.03   | 664.59   | 157 | 50   | DG 38:3; [M+NH4]+;<br>DG(16:1/22:2/0:0) |

|          |         |         |          |     |      |                                                      |
|----------|---------|---------|----------|-----|------|------------------------------------------------------|
| 664.6234 | 664     | -0.03   | 664.59   | 157 | 50   | DG 38:3; [M+NH4] <sup>+</sup> ;<br>DG(22:2/16:1/0:0) |
| 664.6234 | 664     | -0.03   | 664.59   | 158 | 50   | DG 38:3; [M+NH4] <sup>+</sup> ;<br>DG(16:1/22:2/0:0) |
| 664.6234 | 664     | -0.03   | 664.59   | 158 | 50   | DG 38:3; [M+NH4] <sup>+</sup> ;<br>DG(22:2/16:1/0:0) |
| 118.0873 | 117.079 | -0.001  | 118.0863 | 298 | 82.7 | Betaine                                              |
| 118.0873 | 117.079 | -0.001  | 118.0863 | 293 | 82.7 | Betaine                                              |
| 118.0873 | 117.079 | -0.001  | 118.0863 | 288 | 82.7 | Betaine                                              |
| 118.0873 | 117.079 | -0.001  | 118.0863 | 449 | 99   | Betaine                                              |
| 118.0873 | 117.079 | -0.001  | 118.0863 | 446 | 99   | Betaine                                              |
| 118.0873 | 117.079 | -0.001  | 118.0863 | 443 | 99   | Betaine                                              |
| 118.0873 | 117.079 | -0.001  | 118.0863 | 313 | 71.5 | Betaine                                              |
| 118.0873 | 117.079 | -0.001  | 118.0863 | 309 | 71.5 | Betaine                                              |
| 118.0873 | 117.079 | -0.001  | 118.0863 | 306 | 71.5 | Betaine                                              |
| 118.0873 | 117.079 | -0.001  | 118.0863 | 378 | 47.3 | Betaine                                              |
| 118.0873 | 117.079 | -0.001  | 118.0863 | 377 | 47.3 | Betaine                                              |
| 118.0873 | 117.079 | -0.001  | 118.0863 | 374 | 47.3 | Betaine                                              |
| 668.6187 | 668     | 0       | 668.62   | 215 | 50   | DG 38:1; [M+NH4] <sup>+</sup> ;<br>DG(16:1/22:0/0:0) |
| 668.6187 | 668     | 0       | 668.62   | 215 | 50   | DG 38:1; [M+NH4] <sup>+</sup> ;<br>DG(22:0/16:1/0:0) |
| 106.0872 | 105     | 0       | 106.09   | 190 | 77.1 | Diethanolamine                                       |
| 106.0872 | 105.079 | -0.0009 | 106.0863 | 150 | 17.9 | Diethanolamine                                       |
| 106.0872 | 105.079 | -0.0009 | 106.0863 | 149 | 17.9 | Diethanolamine                                       |
| 106.0872 | 105.079 | -0.0009 | 106.0863 | 118 | 100  | Diethanolamine                                       |
| 106.0872 | 105.079 | -0.0009 | 106.0863 | 118 | 100  | Diethanolamine                                       |
| 106.0872 | 105.079 | -0.0009 | 106.0863 | 116 | 100  | Diethanolamine                                       |
| 106.0872 | 105.079 | -0.0009 | 106.0863 | 175 | 100  | Diethanolamine                                       |
| 106.0872 | 105.079 | -0.0009 | 106.0863 | 163 | 100  | Diethanolamine                                       |
| 106.0872 | 105.079 | -0.0009 | 106.0863 | 154 | 100  | Diethanolamine                                       |
| 118.0873 | 117.079 | -0.001  | 118.0863 | 384 | 47.4 | Betaine                                              |
| 118.0873 | 117.079 | -0.001  | 118.0863 | 382 | 47.4 | Betaine                                              |
| 118.0873 | 117.079 | -0.001  | 118.0863 | 380 | 47.4 | Betaine                                              |
| 118.0873 | 117.079 | -0.001  | 118.0863 | 293 | 70.9 | Betaine                                              |
| 118.0873 | 117.079 | -0.001  | 118.0863 | 292 | 70.9 | Betaine                                              |
| 118.0873 | 117.079 | -0.001  | 118.0863 | 282 | 70.9 | Betaine                                              |
| 118.0873 | 117.079 | -0.001  | 118.0863 | 346 | 60.1 | Betaine                                              |
| 118.0873 | 117.079 | -0.001  | 118.0863 | 346 | 60.1 | Betaine                                              |
| 118.0873 | 117.079 | -0.001  | 118.0863 | 344 | 60.1 | Betaine                                              |
| 97.0774  | 114.104 | 0.0238  | 97.1012  | 26  | 25.6 | Cyclohexanemethanol                                  |
| 97.0774  | 114.104 | 0.0238  | 97.1012  | 24  | 23.6 | Cyclohexanol, 1-methyl-                              |
| 97.0774  | 114.104 | 0.0238  | 97.1012  | 22  | 25.6 | Cyclohexanemethanol                                  |
| 664.6234 | 664     | -0.03   | 664.59   | 151 | 50   | DG 38:3; [M+NH4] <sup>+</sup> ;<br>DG(16:1/22:2/0:0) |
| 664.6234 | 664     | -0.03   | 664.59   | 151 | 50   | DG 38:3; [M+NH4] <sup>+</sup> ;<br>DG(22:2/16:1/0:0) |

|          |         |         |          |     |      |                                                      |
|----------|---------|---------|----------|-----|------|------------------------------------------------------|
| 664.6234 | 664     | -0.03   | 664.59   | 160 | 50   | DG 38:3; [M+NH4] <sup>+</sup> ;<br>DG(16:1/22:2/0:0) |
| 664.6234 | 664     | -0.03   | 664.59   | 160 | 50   | DG 38:3; [M+NH4] <sup>+</sup> ;<br>DG(22:2/16:1/0:0) |
| 664.6234 | 664     | -0.03   | 664.59   | 153 | 50   | DG 38:3; [M+NH4] <sup>+</sup> ;<br>DG(16:1/22:2/0:0) |
| 664.6234 | 664     | -0.03   | 664.59   | 153 | 50   | DG 38:3; [M+NH4] <sup>+</sup> ;<br>DG(22:2/16:1/0:0) |
| 84.0822  | 102.092 | -0.0014 | 84.0808  | 242 | 51   | Betaine aldehyde cation                              |
| 84.0822  | 102.092 | -0.0014 | 84.0808  | 241 | 49   | Betaine aldehyde cation                              |
| 84.0822  | 102.092 | -0.0014 | 84.0808  | 163 | 50   | Betaine aldehyde cation                              |
| 84.0822  | 102.092 | -0.0014 | 84.0808  | 163 | 50   | Betaine aldehyde cation                              |
| 186.0588 | 370.196 | 0.0467  | 186.1055 | 53  | 100  | Ser-His-Lys                                          |
| 186.0588 | 163.084 | 0.0149  | 186.0737 | 140 | 100  | N,N-Bis(2-hydroxyethyl)glycine                       |
| 118.0873 | 117.079 | -0.001  | 118.0863 | 287 | 42.6 | Betaine                                              |
| 118.0873 | 117.079 | -0.001  | 118.0863 | 286 | 42.6 | Betaine                                              |
| 118.0873 | 117.079 | -0.001  | 118.0863 | 282 | 42.6 | Betaine                                              |
| 118.0873 | 117.079 | -0.001  | 118.0863 | 318 | 96.9 | Betaine                                              |
| 118.0873 | 117.079 | -0.001  | 118.0863 | 317 | 96.9 | Betaine                                              |
| 118.0873 | 117.079 | -0.001  | 118.0863 | 311 | 96.9 | Betaine                                              |
| 118.0873 | 117.079 | -0.001  | 118.0863 | 323 | 75.6 | Betaine                                              |
| 118.0873 | 117.079 | -0.001  | 118.0863 | 320 | 75.6 | Betaine                                              |
| 118.0873 | 117.079 | -0.001  | 118.0863 | 318 | 75.6 | Betaine                                              |
| 97.0774  | 114.104 | 0.0238  | 97.1012  | 37  | 22.4 | Cyclohexanemethanol                                  |
| 97.0774  | 114.104 | 0.0238  | 97.1012  | 34  | 19.8 | Cyclohexanol, 4-methyl-, trans-                      |
| 97.0774  | 114.104 | 0.0238  | 97.1012  | 32  | 18.3 | Cyclohexanol, 1-methyl-                              |
| 694.6329 | 694     | 0       | 694.63   | 160 | 50   | DG 40:2; [M+NH4] <sup>+</sup> ;<br>DG(16:1/24:1/0:0) |
| 694.6329 | 694     | 0       | 694.63   | 160 | 50   | DG 40:2; [M+NH4] <sup>+</sup> ;<br>DG(24:1/16:1/0:0) |
| 694.6329 | 694     | 0       | 694.63   | 160 | 50   | DG 40:2; [M+NH4] <sup>+</sup> ;<br>DG(16:1/24:1/0:0) |
| 694.6329 | 694     | 0       | 694.63   | 160 | 50   | DG 40:2; [M+NH4] <sup>+</sup> ;<br>DG(24:1/16:1/0:0) |
| 694.6329 | 694     | 0       | 694.63   | 159 | 50   | DG 40:2; [M+NH4] <sup>+</sup> ;<br>DG(16:1/24:1/0:0) |
| 694.6329 | 694     | 0       | 694.63   | 159 | 50   | DG 40:2; [M+NH4] <sup>+</sup> ;<br>DG(24:1/16:1/0:0) |
| 118.0873 | 117.079 | -0.001  | 118.0863 | 319 | 42.8 | Betaine                                              |
| 118.0873 | 117.079 | -0.001  | 118.0863 | 317 | 42.8 | Betaine                                              |
| 118.0873 | 117.079 | -0.001  | 118.0863 | 317 | 42.8 | Betaine                                              |
| 118.0873 | 117.079 | -0.001  | 118.0863 | 331 | 93.5 | Betaine                                              |
| 118.0873 | 117.079 | -0.001  | 118.0863 | 328 | 93.5 | Betaine                                              |
| 118.0873 | 117.079 | -0.001  | 118.0863 | 328 | 93.5 | Betaine                                              |
| 118.0873 | 117.079 | -0.001  | 118.0863 | 300 | 68   | Betaine                                              |
| 118.0873 | 117.079 | -0.001  | 118.0863 | 299 | 68   | Betaine                                              |
| 118.0873 | 117.079 | -0.001  | 118.0863 | 292 | 68   | Betaine                                              |

|          |         |         |          |     |      |                                 |
|----------|---------|---------|----------|-----|------|---------------------------------|
| 84.0822  | 102.092 | -0.0014 | 84.0808  | 259 | 51   | Betaine aldehyde cation         |
| 84.0822  | 102.092 | -0.0014 | 84.0808  | 258 | 49   | Betaine aldehyde cation         |
| 84.0822  | 102.092 | -0.0014 | 84.0808  | 185 | 51   | Betaine aldehyde cation         |
| 84.0822  | 102.092 | -0.0014 | 84.0808  | 184 | 49   | Betaine aldehyde cation         |
| 84.0822  | 102.092 | -0.0014 | 84.0808  | 146 | 51   | Betaine aldehyde cation         |
| 84.0822  | 102.092 | -0.0014 | 84.0808  | 145 | 49   | Betaine aldehyde cation         |
| 118.0873 | 117.079 | -0.001  | 118.0863 | 330 | 40.2 | Betaine                         |
| 118.0873 | 117.079 | -0.001  | 118.0863 | 330 | 40.2 | Betaine                         |
| 118.0873 | 117.079 | -0.001  | 118.0863 | 327 | 40.2 | Betaine                         |
| 118.0873 | 117.079 | -0.001  | 118.0863 | 291 | 64.3 | Betaine                         |
| 118.0873 | 117.079 | -0.001  | 118.0863 | 290 | 64.3 | Betaine                         |
| 118.0873 | 117.079 | -0.001  | 118.0863 | 284 | 64.3 | Betaine                         |
| 118.0873 | 117.079 | -0.001  | 118.0863 | 342 | 33.8 | Betaine                         |
| 118.0873 | 117.079 | -0.001  | 118.0863 | 340 | 33.8 | Betaine                         |
| 118.0873 | 117.079 | -0.001  | 118.0863 | 338 | 33.8 | Betaine                         |
| 186.0588 | 163.084 | 0.0149  | 186.0737 | 154 | 100  | N,N-Bis(2-hydroxyethyl)glycine  |
| 118.0873 | 117.079 | -0.001  | 118.0863 | 287 | 100  | Betaine                         |
| 118.0873 | 117.079 | -0.001  | 118.0863 | 286 | 100  | Betaine                         |
| 118.0873 | 117.079 | -0.001  | 118.0863 | 275 | 100  | Betaine                         |
| 118.0873 | 117.079 | -0.001  | 118.0863 | 349 | 56.4 | Betaine                         |
| 118.0873 | 117.079 | -0.001  | 118.0863 | 349 | 56.4 | Betaine                         |
| 118.0873 | 117.079 | -0.001  | 118.0863 | 337 | 56.4 | Betaine                         |
| 118.0873 | 117.079 | -0.001  | 118.0863 | 295 | 32.7 | Betaine                         |
| 118.0873 | 117.079 | -0.001  | 118.0863 | 295 | 32.7 | Betaine                         |
| 118.0873 | 117.079 | -0.001  | 118.0863 | 294 | 32.7 | Betaine                         |
| 118.0873 | 117.079 | -0.001  | 118.0863 | 347 | 55   | Betaine                         |
| 118.0873 | 117.079 | -0.001  | 118.0863 | 344 | 55   | Betaine                         |
| 118.0873 | 117.079 | -0.001  | 118.0863 | 340 | 55   | Betaine                         |
| 106.0872 | 105     | 0       | 106.09   | 175 | 70.4 | Diethanolamine                  |
| 106.0872 | 105.079 | -0.0009 | 106.0863 | 151 | 23.6 | Diethanolamine                  |
| 106.0872 | 105.079 | -0.0009 | 106.0863 | 150 | 23.6 | Diethanolamine                  |
| 106.0872 | 105     | 0       | 106.09   | 154 | 73.7 | Diethanolamine                  |
| 106.0872 | 105.079 | -0.0009 | 106.0863 | 123 | 20.1 | Diethanolamine                  |
| 106.0872 | 105.079 | -0.0009 | 106.0863 | 122 | 20.1 | Diethanolamine                  |
| 84.0822  | 102.092 | -0.0014 | 84.0808  | 239 | 53.1 | Betaine aldehyde cation         |
| 84.0822  | 102.092 | -0.0014 | 84.0808  | 236 | 46.9 | Betaine aldehyde cation         |
| 84.0822  | 102.092 | -0.0014 | 84.0808  | 178 | 50   | Betaine aldehyde cation         |
| 84.0822  | 102.092 | -0.0014 | 84.0808  | 178 | 50   | Betaine aldehyde cation         |
| 84.0822  | 102.092 | -0.0014 | 84.0808  | 171 | 51   | Betaine aldehyde cation         |
| 84.0822  | 102.092 | -0.0014 | 84.0808  | 170 | 49   | Betaine aldehyde cation         |
| 84.0822  | 102.092 | -0.0014 | 84.0808  | 144 | 51   | Betaine aldehyde cation         |
| 84.0822  | 102.092 | -0.0014 | 84.0808  | 143 | 49   | Betaine aldehyde cation         |
| 84.0822  | 102.092 | -0.0014 | 84.0808  | 116 | 50   | Betaine aldehyde cation         |
| 84.0822  | 102.092 | -0.0014 | 84.0808  | 116 | 50   | Betaine aldehyde cation         |
| 148.0974 | 147     | -0.04   | 148.06   | 57  | 52   | O-acetyl-L-serine hydrochloride |
| 148.0974 | 147     | -0.04   | 148.06   | 55  | 48   | O-acetyl-L-serine hydrochloride |
| 118.0873 | 117.079 | -0.001  | 118.0863 | 318 | 30.8 | Betaine                         |

|          |         |         |          |     |      |                                         |
|----------|---------|---------|----------|-----|------|-----------------------------------------|
| 118.0873 | 117.079 | -0.001  | 118.0863 | 316 | 30.8 | Betaine                                 |
| 118.0873 | 117.079 | -0.001  | 118.0863 | 312 | 30.8 | Betaine                                 |
| 118.0873 | 117.079 | -0.001  | 118.0863 | 321 | 32.8 | Betaine                                 |
| 118.0873 | 117.079 | -0.001  | 118.0863 | 320 | 32.8 | Betaine                                 |
| 118.0873 | 117.079 | -0.001  | 118.0863 | 317 | 32.8 | Betaine                                 |
| 118.0873 | 117.079 | -0.001  | 118.0863 | 308 | 60.2 | Betaine                                 |
| 118.0873 | 117.079 | -0.001  | 118.0863 | 306 | 60.2 | Betaine                                 |
| 118.0873 | 117.079 | -0.001  | 118.0863 | 305 | 60.2 | Betaine                                 |
| 106.0872 | 105     | 0       | 106.09   | 172 | 69.5 | Diethanolamine                          |
| 106.0872 | 105.079 | -0.0009 | 106.0863 | 148 | 23.3 | Diethanolamine                          |
| 106.0872 | 105.079 | -0.0009 | 106.0863 | 147 | 23.3 | Diethanolamine                          |
| 106.0872 | 105.079 | -0.0009 | 106.0863 | 138 | 100  | Diethanolamine                          |
| 106.0872 | 105.079 | -0.0009 | 106.0863 | 137 | 100  | Diethanolamine                          |
| 106.0872 | 105.079 | -0.0009 | 106.0863 | 131 | 100  | Diethanolamine                          |
| 84.0822  | 102.092 | -0.0014 | 84.0808  | 279 | 51   | Betaine aldehyde cation                 |
| 84.0822  | 102.092 | -0.0014 | 84.0808  | 278 | 49   | Betaine aldehyde cation                 |
| 84.0822  | 102.092 | -0.0014 | 84.0808  | 210 | 53.1 | Betaine aldehyde cation                 |
| 84.0822  | 102.092 | -0.0014 | 84.0808  | 207 | 46.9 | Betaine aldehyde cation                 |
| 84.0822  | 102.092 | -0.0014 | 84.0808  | 127 | 53.1 | Betaine aldehyde cation                 |
| 84.0822  | 102.092 | -0.0014 | 84.0808  | 124 | 46.9 | Betaine aldehyde cation                 |
| 186.0588 | 163.084 | 0.0149  | 186.0737 | 79  | 73.2 | N,N-Bis(2-hydroxyethyl)glycine          |
| 186.0588 | 203.091 | 0.0285  | 186.0873 | 56  | 26.8 | Ala-Asn                                 |
| 186.0588 | 163.084 | 0.0149  | 186.0737 | 12  | 73.2 | N,N-Bis(2-hydroxyethyl)glycine          |
| 186.0588 | 163.084 | 0.0149  | 186.0737 | 129 | 92.4 | N,N-Bis(2-hydroxyethyl)glycine          |
| 186.0588 | 370.196 | 0.0467  | 186.1055 | 35  | 7.6  | Ser-His-Lys                             |
| 666.6406 | 666     | -0.04   | 666.6    | 160 | 50   | DG 38:2; [M+NH4]+;<br>DG(16:1/22:1/0:0) |
| 666.6406 | 666     | -0.04   | 666.6    | 160 | 50   | DG 38:2; [M+NH4]+;<br>DG(22:1/16:1/0:0) |
| 666.6406 | 666     | -0.04   | 666.6    | 108 | 50   | DG 38:2; [M+NH4]+;<br>DG(16:1/22:1/0:0) |
| 666.6406 | 666     | -0.04   | 666.6    | 108 | 50   | DG 38:2; [M+NH4]+;<br>DG(22:1/16:1/0:0) |
| 666.6406 | 666     | -0.04   | 666.6    | 60  | 50   | DG 38:2; [M+NH4]+;<br>DG(16:1/22:1/0:0) |
| 666.6406 | 666     | -0.04   | 666.6    | 60  | 50   | DG 38:2; [M+NH4]+;<br>DG(22:1/16:1/0:0) |
| 666.6406 | 666     | -0.04   | 666.6    | 54  | 50   | DG 38:2; [M+NH4]+;<br>DG(16:1/22:1/0:0) |
| 666.6406 | 666     | -0.04   | 666.6    | 54  | 50   | DG 38:2; [M+NH4]+;<br>DG(22:1/16:1/0:0) |
| 118.0873 | 117.079 | -0.001  | 118.0863 | 256 | 75.4 | Betaine                                 |
| 118.0873 | 117.079 | -0.001  | 118.0863 | 255 | 75.4 | Betaine                                 |
| 118.0873 | 117.079 | -0.001  | 118.0863 | 252 | 75.4 | Betaine                                 |
| 118.0873 | 117.079 | -0.001  | 118.0863 | 433 | 43   | Betaine                                 |
| 118.0873 | 117.079 | -0.001  | 118.0863 | 433 | 43   | Betaine                                 |
| 118.0873 | 117.079 | -0.001  | 118.0863 | 428 | 43   | Betaine                                 |

|          |         |        |          |     |      |                                                      |
|----------|---------|--------|----------|-----|------|------------------------------------------------------|
| 118.0873 | 117.079 | -0.001 | 118.0863 | 290 | 63.6 | Betaine                                              |
| 118.0873 | 117.079 | -0.001 | 118.0863 | 289 | 63.6 | Betaine                                              |
| 118.0873 | 117.079 | -0.001 | 118.0863 | 286 | 63.6 | Betaine                                              |
| 118.0873 | 117.079 | -0.001 | 118.0863 | 399 | 54.5 | Betaine                                              |
| 118.0873 | 117.079 | -0.001 | 118.0863 | 397 | 54.5 | Betaine                                              |
| 118.0873 | 117.079 | -0.001 | 118.0863 | 394 | 54.5 | Betaine                                              |
| 97.0774  | 114.104 | 0.0238 | 97.1012  | 34  | 27.9 | Cyclohexanol, 4-methyl-, trans-                      |
| 97.0774  | 114.104 | 0.0238 | 97.1012  | 31  | 24.6 | Cyclohexanemethanol                                  |
| 97.0774  | 114.104 | 0.0238 | 97.1012  | 28  | 24.6 | Cyclohexanemethanol                                  |
| 696.651  | 696     | 0      | 696.65   | 197 | 50   | DG 40:1; [M+NH4] <sup>+</sup> ;<br>DG(16:1/24:0/0:0) |
| 696.651  | 696     | 0      | 696.65   | 197 | 50   | DG 40:1; [M+NH4] <sup>+</sup> ;<br>DG(24:0/16:1/0:0) |
| 696.651  | 696     | 0      | 696.65   | 122 | 50   | DG 40:1; [M+NH4] <sup>+</sup> ;<br>DG(16:1/24:0/0:0) |
| 696.651  | 696     | 0      | 696.65   | 122 | 50   | DG 40:1; [M+NH4] <sup>+</sup> ;<br>DG(24:0/16:1/0:0) |
| 696.651  | 696     | 0      | 696.65   | 56  | 50   | DG 40:1; [M+NH4] <sup>+</sup> ;<br>DG(16:1/24:0/0:0) |
| 696.651  | 696     | 0      | 696.65   | 56  | 50   | DG 40:1; [M+NH4] <sup>+</sup> ;<br>DG(24:0/16:1/0:0) |
| 696.651  | 696     | 0      | 696.65   | 68  | 50   | DG 40:1; [M+NH4] <sup>+</sup> ;<br>DG(16:1/24:0/0:0) |
| 696.651  | 696     | 0      | 696.65   | 68  | 50   | DG 40:1; [M+NH4] <sup>+</sup> ;<br>DG(24:0/16:1/0:0) |
| 106.0872 | 105     | 0      | 106.09   | 154 | 83.5 | Diethanolamine                                       |
| 106.0872 | 105     | 0      | 106.09   | 101 | 16.5 | Diethanolamine                                       |
| 666.6406 | 666     | -0.04  | 666.6    | 156 | 50   | DG 38:2; [M+NH4] <sup>+</sup> ;<br>DG(16:1/22:1/0:0) |
| 666.6406 | 666     | -0.04  | 666.6    | 156 | 50   | DG 38:2; [M+NH4] <sup>+</sup> ;<br>DG(22:1/16:1/0:0) |
| 666.6406 | 666     | -0.04  | 666.6    | 112 | 50   | DG 38:2; [M+NH4] <sup>+</sup> ;<br>DG(16:1/22:1/0:0) |
| 666.6406 | 666     | -0.04  | 666.6    | 112 | 50   | DG 38:2; [M+NH4] <sup>+</sup> ;<br>DG(22:1/16:1/0:0) |
| 666.6406 | 666     | -0.04  | 666.6    | 111 | 50   | DG 38:2; [M+NH4] <sup>+</sup> ;<br>DG(16:1/22:1/0:0) |
| 666.6406 | 666     | -0.04  | 666.6    | 111 | 50   | DG 38:2; [M+NH4] <sup>+</sup> ;<br>DG(22:1/16:1/0:0) |
| 696.651  | 696     | 0      | 696.65   | 159 | 50   | DG 40:1; [M+NH4] <sup>+</sup> ;<br>DG(16:1/24:0/0:0) |
| 696.651  | 696     | 0      | 696.65   | 159 | 50   | DG 40:1; [M+NH4] <sup>+</sup> ;<br>DG(24:0/16:1/0:0) |
| 696.651  | 696     | 0      | 696.65   | 127 | 50   | DG 40:1; [M+NH4] <sup>+</sup> ;<br>DG(16:1/24:0/0:0) |
| 696.651  | 696     | 0      | 696.65   | 127 | 50   | DG 40:1; [M+NH4] <sup>+</sup> ;<br>DG(24:0/16:1/0:0) |

|          |         |         |          |     |      |                                                      |
|----------|---------|---------|----------|-----|------|------------------------------------------------------|
| 696.651  | 696     | 0       | 696.65   | 89  | 50   | DG 40:1; [M+NH4] <sup>+</sup> ;<br>DG(16:1/24:0/0:0) |
| 696.651  | 696     | 0       | 696.65   | 89  | 50   | DG 40:1; [M+NH4] <sup>+</sup> ;<br>DG(24:0/16:1/0:0) |
| 696.651  | 696     | 0       | 696.65   | 71  | 50   | DG 40:1; [M+NH4] <sup>+</sup> ;<br>DG(16:1/24:0/0:0) |
| 696.651  | 696     | 0       | 696.65   | 71  | 50   | DG 40:1; [M+NH4] <sup>+</sup> ;<br>DG(24:0/16:1/0:0) |
| 118.0873 | 117.079 | -0.001  | 118.0863 | 286 | 69.9 | Betaine                                              |
| 118.0873 | 117.079 | -0.001  | 118.0863 | 277 | 69.9 | Betaine                                              |
| 118.0873 | 117.079 | -0.001  | 118.0863 | 269 | 69.9 | Betaine                                              |
| 118.0873 | 117.079 | -0.001  | 118.0863 | 389 | 35.9 | Betaine                                              |
| 118.0873 | 117.079 | -0.001  | 118.0863 | 386 | 35.9 | Betaine                                              |
| 118.0873 | 117.079 | -0.001  | 118.0863 | 384 | 35.9 | Betaine                                              |
| 118.0873 | 117.079 | -0.001  | 118.0863 | 307 | 71.1 | Betaine                                              |
| 118.0873 | 117.079 | -0.001  | 118.0863 | 305 | 71.1 | Betaine                                              |
| 118.0873 | 117.079 | -0.001  | 118.0863 | 301 | 71.1 | Betaine                                              |
| 118.0873 | 117     | 0       | 118.09   | 358 | 26.9 | Betaine                                              |
| 118.0873 | 117.079 | -0.001  | 118.0863 | 357 | 25.9 | Betaine                                              |
| 118.0873 | 117.079 | -0.001  | 118.0863 | 354 | 25.9 | Betaine                                              |
| 97.0774  | 114.104 | 0.0238  | 97.1012  | 48  | 25.2 | Cyclohexanemethanol                                  |
| 97.0774  | 114.104 | 0.0238  | 97.1012  | 45  | 22.3 | Cyclohexanol, 4-methyl-, trans-                      |
| 97.0774  | 114.104 | 0.0238  | 97.1012  | 37  | 25.2 | Cyclohexanemethanol                                  |
| 106.0872 | 105     | 0       | 106.09   | 228 | 77.9 | Diethanolamine                                       |
| 106.0872 | 105.079 | -0.0009 | 106.0863 | 199 | 22.1 | Diethanolamine                                       |
| 106.0872 | 105.079 | -0.0009 | 106.0863 | 199 | 22.1 | Diethanolamine                                       |
| 106.0872 | 105.079 | -0.0009 | 106.0863 | 114 | 100  | Diethanolamine                                       |
| 106.0872 | 105.079 | -0.0009 | 106.0863 | 114 | 100  | Diethanolamine                                       |
| 106.0872 | 105.079 | -0.0009 | 106.0863 | 112 | 100  | Diethanolamine                                       |
| 696.651  | 696     | 0       | 696.65   | 159 | 50   | DG 40:1; [M+NH4] <sup>+</sup> ;<br>DG(16:1/24:0/0:0) |
| 696.651  | 696     | 0       | 696.65   | 159 | 50   | DG 40:1; [M+NH4] <sup>+</sup> ;<br>DG(24:0/16:1/0:0) |
| 696.651  | 696     | 0       | 696.65   | 159 | 50   | DG 40:1; [M+NH4] <sup>+</sup> ;<br>DG(16:1/24:0/0:0) |
| 696.651  | 696     | 0       | 696.65   | 159 | 50   | DG 40:1; [M+NH4] <sup>+</sup> ;<br>DG(24:0/16:1/0:0) |
| 666.6406 | 666     | -0.04   | 666.6    | 160 | 50   | DG 38:2; [M+NH4] <sup>+</sup> ;<br>DG(16:1/22:1/0:0) |
| 666.6406 | 666     | -0.04   | 666.6    | 160 | 50   | DG 38:2; [M+NH4] <sup>+</sup> ;<br>DG(22:1/16:1/0:0) |
| 84.0822  | 102.092 | -0.0014 | 84.0808  | 263 | 50   | Betaine aldehyde cation                              |
| 84.0822  | 102.092 | -0.0014 | 84.0808  | 263 | 50   | Betaine aldehyde cation                              |
| 84.0822  | 102.092 | -0.0014 | 84.0808  | 228 | 51   | Betaine aldehyde cation                              |
| 84.0822  | 102.092 | -0.0014 | 84.0808  | 227 | 49   | Betaine aldehyde cation                              |
| 84.0822  | 102.092 | -0.0014 | 84.0808  | 138 | 53.1 | Betaine aldehyde cation                              |
| 84.0822  | 102.092 | -0.0014 | 84.0808  | 135 | 46.9 | Betaine aldehyde cation                              |



|          |         |         |          |     |      |                                       |
|----------|---------|---------|----------|-----|------|---------------------------------------|
| 186.0588 | 163.084 | 0.0149  | 186.0737 | 157 | 93.2 | N,N-Bis(2-hydroxyethyl)glycine        |
| 186.0588 | 163.084 | 0.0149  | 186.0737 | 97  | 93.2 | N,N-Bis(2-hydroxyethyl)glycine        |
| 186.0588 | 203.091 | 0.0285  | 186.0873 | 56  | 6.8  | Ala-Asn                               |
| 186.0588 | 163.084 | 0.0149  | 186.0737 | 135 | 83.6 | N,N-Bis(2-hydroxyethyl)glycine        |
| 186.0588 | 370.196 | 0.0467  | 186.1055 | 81  | 16.4 | Ser-His-Lys                           |
| 118.0873 | 117.079 | -0.001  | 118.0863 | 324 | 100  | Betaine                               |
| 118.0873 | 117.079 | -0.001  | 118.0863 | 323 | 100  | Betaine                               |
| 118.0873 | 117.079 | -0.001  | 118.0863 | 322 | 100  | Betaine                               |
| 118.0873 | 117     | 0       | 118.09   | 367 | 25.1 | Betaine                               |
| 118.0873 | 117.079 | -0.001  | 118.0863 | 367 | 25.1 | Betaine                               |
| 118.0873 | 117.079 | -0.001  | 118.0863 | 365 | 25.1 | Betaine                               |
| 118.0873 | 117.079 | -0.001  | 118.0863 | 268 | 95.4 | Betaine                               |
| 118.0873 | 117.079 | -0.001  | 118.0863 | 259 | 95.4 | Betaine                               |
| 118.0873 | 117.079 | -0.001  | 118.0863 | 225 | 95.4 | Betaine                               |
| 118.0873 | 117.079 | -0.001  | 118.0863 | 326 | 42.2 | Betaine                               |
| 118.0873 | 117.079 | -0.001  | 118.0863 | 325 | 42.2 | Betaine                               |
| 118.0873 | 117.079 | -0.001  | 118.0863 | 320 | 42.2 | Betaine                               |
| 97.0774  | 114.104 | 0.0238  | 97.1012  | 51  | 24.3 | Cyclohexanol, 1-methyl-               |
| 97.0774  | 114.104 | 0.0238  | 97.1012  | 47  | 20.5 | Cyclohexanol, 4-methyl-, trans-       |
| 97.0774  | 114.104 | 0.0238  | 97.1012  | 41  | 16.1 | Cyclohexanemethanol                   |
| 97.0774  | 114.104 | 0.0238  | 97.1012  | 37  | 24   | Cyclohexanemethanol                   |
| 97.0774  | 114.104 | 0.0238  | 97.1012  | 34  | 21.2 | Cyclohexanol, 4-methyl-, trans-       |
| 97.0774  | 114.104 | 0.0238  | 97.1012  | 31  | 24   | Cyclohexanemethanol                   |
| 106.0872 | 105     | 0       | 106.09   | 216 | 78.2 | Diethanolamine                        |
| 106.0872 | 105.079 | -0.0009 | 106.0863 | 186 | 21.8 | Diethanolamine                        |
| 106.0872 | 105.079 | -0.0009 | 106.0863 | 185 | 21.8 | Diethanolamine                        |
| 106.0872 | 105     | 0       | 106.09   | 159 | 79.3 | Diethanolamine                        |
| 106.0872 | 105.079 | -0.0009 | 106.0863 | 126 | 20.7 | Diethanolamine                        |
| 106.0872 | 105.079 | -0.0009 | 106.0863 | 125 | 20.7 | Diethanolamine                        |
| 118.0873 | 117.079 | -0.001  | 118.0863 | 313 | 100  | Betaine                               |
| 118.0873 | 117.079 | -0.001  | 118.0863 | 308 | 100  | Betaine                               |
| 118.0873 | 117.079 | -0.001  | 118.0863 | 307 | 100  | Betaine                               |
| 118.0873 | 117.079 | -0.001  | 118.0863 | 309 | 68.5 | Betaine                               |
| 118.0873 | 117.079 | -0.001  | 118.0863 | 309 | 68.5 | Betaine                               |
| 118.0873 | 117.079 | -0.001  | 118.0863 | 301 | 68.5 | Betaine                               |
| 118.0873 | 117.079 | -0.001  | 118.0863 | 319 | 27.9 | Betaine                               |
| 118.0873 | 117.079 | -0.001  | 118.0863 | 316 | 27.9 | Betaine                               |
| 118.0873 | 117.079 | -0.001  | 118.0863 | 315 | 27.9 | Betaine                               |
| 97.0774  | 114.104 | 0.0238  | 97.1012  | 16  | 100  | Cyclopentanemethanol, .alpha.-methyl- |
| 97.0774  | 114.104 | 0.0238  | 97.1012  | 9   | 100  | Cyclopentanemethanol, .alpha.-methyl- |
| 97.0774  | 114.104 | 0.0238  | 97.1012  | 7   | 100  | Cyclopentanemethanol, .alpha.-methyl- |
| 97.0774  | 114.104 | 0.0238  | 97.1012  | 26  | 32.8 | Cyclohexanemethanol                   |
| 97.0774  | 114.104 | 0.0238  | 97.1012  | 22  | 32.8 | Cyclohexanemethanol                   |
| 97.0774  | 114.104 | 0.0238  | 97.1012  | 21  | 26.4 | Cyclohexanol, 2-methyl-, trans-       |

|          |         |         |          |     |      |                                 |
|----------|---------|---------|----------|-----|------|---------------------------------|
| 106.0872 | 105     | 0       | 106.09   | 152 | 80.4 | Diethanolamine                  |
| 106.0872 | 105.079 | -0.0009 | 106.0863 | 115 | 19.6 | Diethanolamine                  |
| 106.0872 | 105.079 | -0.0009 | 106.0863 | 114 | 19.6 | Diethanolamine                  |
| 106.0872 | 105.079 | -0.0009 | 106.0863 | 118 | 100  | Diethanolamine                  |
| 106.0872 | 105.079 | -0.0009 | 106.0863 | 118 | 100  | Diethanolamine                  |
| 106.0872 | 105.079 | -0.0009 | 106.0863 | 112 | 100  | Diethanolamine                  |
| 84.0822  | 102.092 | -0.0014 | 84.0808  | 303 | 52   | Betaine aldehyde cation         |
| 84.0822  | 102.092 | -0.0014 | 84.0808  | 301 | 48   | Betaine aldehyde cation         |
| 84.0822  | 102.092 | -0.0014 | 84.0808  | 241 | 50   | Betaine aldehyde cation         |
| 84.0822  | 102.092 | -0.0014 | 84.0808  | 241 | 50   | Betaine aldehyde cation         |
| 118.0873 | 117.079 | -0.001  | 118.0863 | 307 | 59.5 | Betaine                         |
| 118.0873 | 117.079 | -0.001  | 118.0863 | 306 | 59.5 | Betaine                         |
| 118.0873 | 117.079 | -0.001  | 118.0863 | 299 | 59.5 | Betaine                         |
| 118.0873 | 117.079 | -0.001  | 118.0863 | 306 | 68.6 | Betaine                         |
| 118.0873 | 117.079 | -0.001  | 118.0863 | 305 | 68.6 | Betaine                         |
| 118.0873 | 117.079 | -0.001  | 118.0863 | 301 | 68.6 | Betaine                         |
| 118.0873 | 117.079 | -0.001  | 118.0863 | 353 | 43.5 | Betaine                         |
| 118.0873 | 117.079 | -0.001  | 118.0863 | 351 | 43.5 | Betaine                         |
| 118.0873 | 117.079 | -0.001  | 118.0863 | 350 | 43.5 | Betaine                         |
| 97.0774  | 114.104 | 0.0238  | 97.1012  | 44  | 23.5 | Cyclohexanemethanol             |
| 97.0774  | 114.104 | 0.0238  | 97.1012  | 43  | 22.6 | Cyclohexanol, 4-methyl-, trans- |
| 97.0774  | 114.104 | 0.0238  | 97.1012  | 34  | 16.4 | Cyclohexanol, 1-methyl-         |
| 106.0872 | 105     | 0       | 106.09   | 147 | 77.9 | Diethanolamine                  |
| 106.0872 | 105.079 | -0.0009 | 106.0863 | 118 | 22.1 | Diethanolamine                  |
| 106.0872 | 105.079 | -0.0009 | 106.0863 | 117 | 22.1 | Diethanolamine                  |
| 84.0822  | 102.092 | -0.0014 | 84.0808  | 251 | 52   | Betaine aldehyde cation         |
| 84.0822  | 102.092 | -0.0014 | 84.0808  | 249 | 48   | Betaine aldehyde cation         |
| 84.0822  | 102.092 | -0.0014 | 84.0808  | 231 | 50   | Betaine aldehyde cation         |
| 84.0822  | 102.092 | -0.0014 | 84.0808  | 231 | 50   | Betaine aldehyde cation         |
| 84.0822  | 102.092 | -0.0014 | 84.0808  | 137 | 53.1 | Betaine aldehyde cation         |
| 84.0822  | 102.092 | -0.0014 | 84.0808  | 134 | 46.9 | Betaine aldehyde cation         |
| 186.0588 | 370.196 | 0.0467  | 186.1055 | 47  | 100  | Ser-His-Lys                     |
| 186.0588 | 163.084 | 0.0149  | 186.0737 | 162 | 100  | N,N-Bis(2-hydroxyethyl)glycine  |
| 118.0873 | 117.079 | -0.001  | 118.0863 | 410 | 36.6 | Betaine                         |
| 118.0873 | 117.079 | -0.001  | 118.0863 | 408 | 36.6 | Betaine                         |
| 118.0873 | 117.079 | -0.001  | 118.0863 | 405 | 36.6 | Betaine                         |
| 118.0873 | 117.079 | -0.001  | 118.0863 | 297 | 67   | Betaine                         |
| 118.0873 | 117.079 | -0.001  | 118.0863 | 295 | 67   | Betaine                         |
| 118.0873 | 117.079 | -0.001  | 118.0863 | 288 | 67   | Betaine                         |
| 118.0873 | 117.079 | -0.001  | 118.0863 | 322 | 53.6 | Betaine                         |
| 118.0873 | 117.079 | -0.001  | 118.0863 | 321 | 53.6 | Betaine                         |
| 118.0873 | 117.079 | -0.001  | 118.0863 | 316 | 53.6 | Betaine                         |
| 97.0774  | 114.104 | 0.0238  | 97.1012  | 24  | 24.4 | Cyclohexanemethanol             |
| 97.0774  | 114.104 | 0.0238  | 97.1012  | 24  | 24.4 | Cyclohexanol, 4-methyl-, trans- |
| 97.0774  | 114.104 | 0.0238  | 97.1012  | 21  | 21.5 | Cyclohexanol, 1-methyl-         |
| 106.0872 | 105     | 0       | 106.09   | 159 | 75.9 | Diethanolamine                  |
| 106.0872 | 105.079 | -0.0009 | 106.0863 | 124 | 19.1 | Diethanolamine                  |

|          |         |         |          |     |      |                                       |
|----------|---------|---------|----------|-----|------|---------------------------------------|
| 106.0872 | 105.079 | -0.0009 | 106.0863 | 123 | 19.1 | Diethanolamine                        |
| 106.0872 | 105.079 | -0.0009 | 106.0863 | 191 | 100  | Diethanolamine                        |
| 106.0872 | 105.079 | -0.0009 | 106.0863 | 190 | 100  | Diethanolamine                        |
| 106.0872 | 105.079 | -0.0009 | 106.0863 | 189 | 100  | Diethanolamine                        |
| 84.0822  | 102.092 | -0.0014 | 84.0808  | 260 | 51   | Betaine aldehyde cation               |
| 84.0822  | 102.092 | -0.0014 | 84.0808  | 259 | 49   | Betaine aldehyde cation               |
| 84.0822  | 102.092 | -0.0014 | 84.0808  | 198 | 50   | Betaine aldehyde cation               |
| 84.0822  | 102.092 | -0.0014 | 84.0808  | 198 | 50   | Betaine aldehyde cation               |
| 84.0822  | 102.092 | -0.0014 | 84.0808  | 151 | 53.1 | Betaine aldehyde cation               |
| 84.0822  | 102.092 | -0.0014 | 84.0808  | 148 | 46.9 | Betaine aldehyde cation               |
| 186.0588 | 163.084 | 0.0149  | 186.0737 | 157 | 100  | N,N-Bis(2-hydroxyethyl)glycine        |
| 186.0588 | 163.084 | 0.0149  | 186.0737 | 141 | 100  | N,N-Bis(2-hydroxyethyl)glycine        |
| 186.0588 | 163.084 | 0.0149  | 186.0737 | 151 | 100  | N,N-Bis(2-hydroxyethyl)glycine        |
| 118.0873 | 117.079 | -0.001  | 118.0863 | 360 | 25   | Betaine                               |
| 118.0873 | 117.079 | -0.001  | 118.0863 | 357 | 25   | Betaine                               |
| 118.0873 | 117     | 0       | 118.09   | 356 | 21.1 | Betaine                               |
| 118.0873 | 117.079 | -0.001  | 118.0863 | 302 | 67.7 | Betaine                               |
| 118.0873 | 117.079 | -0.001  | 118.0863 | 300 | 67.7 | Betaine                               |
| 118.0873 | 117.079 | -0.001  | 118.0863 | 297 | 67.7 | Betaine                               |
| 118.0873 | 117.079 | -0.001  | 118.0863 | 289 | 64.6 | Betaine                               |
| 118.0873 | 117.079 | -0.001  | 118.0863 | 285 | 64.6 | Betaine                               |
| 118.0873 | 117.079 | -0.001  | 118.0863 | 284 | 64.6 | Betaine                               |
| 97.0774  | 114.104 | 0.0238  | 97.1012  | 29  | 20.9 | Cyclohexanol, 1-methyl-               |
| 97.0774  | 114.104 | 0.0238  | 97.1012  | 29  | 20.9 | Cyclopentanemethanol, .alpha.-methyl- |
| 97.0774  | 114.104 | 0.0238  | 97.1012  | 26  | 18.5 | Cyclohexanemethanol                   |
| 106.0872 | 105     | 0       | 106.09   | 148 | 80.2 | Diethanolamine                        |
| 106.0872 | 105.079 | -0.0009 | 106.0863 | 112 | 19.8 | Diethanolamine                        |
| 106.0872 | 105.079 | -0.0009 | 106.0863 | 112 | 19.8 | Diethanolamine                        |
| 186.0588 | 163.084 | 0.0149  | 186.0737 | 135 | 100  | N,N-Bis(2-hydroxyethyl)glycine        |
| 118.0873 | 117.079 | -0.001  | 118.0863 | 333 | 55   | Betaine                               |
| 118.0873 | 117.079 | -0.001  | 118.0863 | 333 | 55   | Betaine                               |
| 118.0873 | 117.079 | -0.001  | 118.0863 | 326 | 55   | Betaine                               |
| 118.0873 | 117.079 | -0.001  | 118.0863 | 278 | 63   | Betaine                               |
| 118.0873 | 117.079 | -0.001  | 118.0863 | 277 | 63   | Betaine                               |
| 118.0873 | 117.079 | -0.001  | 118.0863 | 275 | 63   | Betaine                               |
| 118.0873 | 117.079 | -0.001  | 118.0863 | 334 | 48.2 | Betaine                               |
| 118.0873 | 117.079 | -0.001  | 118.0863 | 333 | 48.2 | Betaine                               |
| 118.0873 | 117.079 | -0.001  | 118.0863 | 327 | 48.2 | Betaine                               |
| 97.0774  | 114.104 | 0.0238  | 97.1012  | 37  | 23.9 | Cyclohexanemethanol                   |
| 97.0774  | 114.104 | 0.0238  | 97.1012  | 33  | 23.9 | Cyclohexanemethanol                   |
| 97.0774  | 114.104 | 0.0238  | 97.1012  | 33  | 20.2 | Cyclohexanol, 4-methyl-, trans-       |
| 106.0872 | 105     | 0       | 106.09   | 196 | 69.9 | Diethanolamine                        |
| 106.0872 | 105.079 | -0.0009 | 106.0863 | 173 | 25.5 | Diethanolamine                        |
| 106.0872 | 105.079 | -0.0009 | 106.0863 | 172 | 25.5 | Diethanolamine                        |
| 106.0872 | 105     | 0       | 106.09   | 159 | 75.9 | Diethanolamine                        |
| 106.0872 | 105.079 | -0.0009 | 106.0863 | 124 | 19   | Diethanolamine                        |

|          |         |         |          |     |      |                                 |
|----------|---------|---------|----------|-----|------|---------------------------------|
| 106.0872 | 105.079 | -0.0009 | 106.0863 | 123 | 19   | Diethanolamine                  |
| 84.0822  | 102.092 | -0.0014 | 84.0808  | 271 | 50   | Betaine aldehyde cation         |
| 84.0822  | 102.092 | -0.0014 | 84.0808  | 271 | 50   | Betaine aldehyde cation         |
| 84.0822  | 102.092 | -0.0014 | 84.0808  | 233 | 51   | Betaine aldehyde cation         |
| 84.0822  | 102.092 | -0.0014 | 84.0808  | 232 | 49   | Betaine aldehyde cation         |
| 84.0822  | 102.092 | -0.0014 | 84.0808  | 117 | 54.2 | Betaine aldehyde cation         |
| 84.0822  | 102.092 | -0.0014 | 84.0808  | 113 | 45.8 | Betaine aldehyde cation         |
| 84.0822  | 102.092 | -0.0014 | 84.0808  | 220 | 52   | Betaine aldehyde cation         |
| 84.0822  | 102.092 | -0.0014 | 84.0808  | 218 | 48   | Betaine aldehyde cation         |
| 84.0822  | 102.092 | -0.0014 | 84.0808  | 180 | 51   | Betaine aldehyde cation         |
| 84.0822  | 102.092 | -0.0014 | 84.0808  | 179 | 49   | Betaine aldehyde cation         |
| 84.0822  | 102.092 | -0.0014 | 84.0808  | 140 | 54.2 | Betaine aldehyde cation         |
| 84.0822  | 102.092 | -0.0014 | 84.0808  | 136 | 45.8 | Betaine aldehyde cation         |
| 148.0974 | 147     | -0.04   | 148.06   | 57  | 62.3 | O-acetyl-L-serine hydrochloride |
| 148.0974 | 147     | -0.04   | 148.06   | 42  | 37.7 | O-acetyl-L-serine hydrochloride |
| 148.0974 | 147.053 | -0.037  | 148.0604 | 115 | 100  | O-Acetyl-L-serine               |
| 148.0974 | 147.053 | -0.037  | 148.0604 | 162 | 71.2 | O-Acetyl-L-serine               |
| 148.0974 | 147.053 | -0.037  | 148.0604 | 152 | 71.2 | O-Acetyl-L-serine               |
| 148.0974 | 147     | -0.04   | 148.06   | 137 | 21.7 | O-acetyl-L-serine hydrochloride |
| 118.0873 | 117.079 | -0.001  | 118.0863 | 344 | 49.3 | Betaine                         |
| 118.0873 | 117.079 | -0.001  | 118.0863 | 342 | 49.3 | Betaine                         |
| 118.0873 | 117.079 | -0.001  | 118.0863 | 338 | 49.3 | Betaine                         |
| 118.0873 | 117.079 | -0.001  | 118.0863 | 338 | 96.4 | Betaine                         |
| 118.0873 | 117.079 | -0.001  | 118.0863 | 338 | 96.4 | Betaine                         |
| 118.0873 | 117.079 | -0.001  | 118.0863 | 337 | 96.4 | Betaine                         |
| 118.0873 | 117.079 | -0.001  | 118.0863 | 349 | 35.7 | Betaine                         |
| 118.0873 | 117.079 | -0.001  | 118.0863 | 347 | 35.7 | Betaine                         |
| 118.0873 | 117.079 | -0.001  | 118.0863 | 345 | 35.7 | Betaine                         |
| 97.0774  | 114.104 | 0.0238  | 97.1012  | 25  | 33.9 | Cyclohexanol, 1-methyl-         |
| 97.0774  | 114.104 | 0.0238  | 97.1012  | 18  | 25.9 | Cycloheptanol                   |
| 97.0774  | 114.104 | 0.0238  | 97.1012  | 13  | 20.9 | Cyclohexanol, 4-methyl-, trans- |
| 106.0872 | 105     | 0       | 106.09   | 154 | 80.7 | Diethanolamine                  |
| 106.0872 | 105.079 | -0.0009 | 106.0863 | 116 | 19.3 | Diethanolamine                  |
| 106.0872 | 105.079 | -0.0009 | 106.0863 | 116 | 19.3 | Diethanolamine                  |
| 106.0872 | 105     | 0       | 106.09   | 155 | 78   | Diethanolamine                  |
| 106.0872 | 105.079 | -0.0009 | 106.0863 | 122 | 20.4 | Diethanolamine                  |
| 106.0872 | 105.079 | -0.0009 | 106.0863 | 122 | 20.4 | Diethanolamine                  |
| 186.0588 | 163.084 | 0.0149  | 186.0737 | 143 | 100  | N,N-Bis(2-hydroxyethyl)glycine  |
| 186.0588 | 370.196 | 0.0467  | 186.1055 | 58  | 100  | Ser-His-Lys                     |
| 84.0822  | 102.092 | -0.0014 | 84.0808  | 291 | 53.1 | Betaine aldehyde cation         |
| 84.0822  | 102.092 | -0.0014 | 84.0808  | 288 | 46.9 | Betaine aldehyde cation         |
| 84.0822  | 102.092 | -0.0014 | 84.0808  | 260 | 53.1 | Betaine aldehyde cation         |
| 84.0822  | 102.092 | -0.0014 | 84.0808  | 257 | 46.9 | Betaine aldehyde cation         |
| 84.0822  | 102.092 | -0.0014 | 84.0808  | 185 | 53.1 | Betaine aldehyde cation         |
| 84.0822  | 102.092 | -0.0014 | 84.0808  | 182 | 46.9 | Betaine aldehyde cation         |
| 118.0873 | 117.079 | -0.001  | 118.0863 | 344 | 48.3 | Betaine                         |
| 118.0873 | 117.079 | -0.001  | 118.0863 | 343 | 48.3 | Betaine                         |

|          |         |         |          |     |      |                                |
|----------|---------|---------|----------|-----|------|--------------------------------|
| 118.0873 | 117.079 | -0.001  | 118.0863 | 341 | 48.3 | Betaine                        |
| 118.0873 | 117.079 | -0.001  | 118.0863 | 307 | 72   | Betaine                        |
| 118.0873 | 117.079 | -0.001  | 118.0863 | 306 | 72   | Betaine                        |
| 118.0873 | 117.079 | -0.001  | 118.0863 | 297 | 72   | Betaine                        |
| 118.0873 | 117.079 | -0.001  | 118.0863 | 338 | 69.2 | Betaine                        |
| 118.0873 | 117.079 | -0.001  | 118.0863 | 337 | 69.2 | Betaine                        |
| 118.0873 | 117.079 | -0.001  | 118.0863 | 336 | 69.2 | Betaine                        |
| 106.0872 | 105     | 0       | 106.09   | 151 | 75.5 | Diethanolamine                 |
| 106.0872 | 105.079 | -0.0009 | 106.0863 | 114 | 18.4 | Diethanolamine                 |
| 106.0872 | 105.079 | -0.0009 | 106.0863 | 114 | 18.4 | Diethanolamine                 |
| 106.0872 | 105     | 0       | 106.09   | 145 | 70.2 | Diethanolamine                 |
| 106.0872 | 105.079 | -0.0009 | 106.0863 | 124 | 29.8 | Diethanolamine                 |
| 106.0872 | 105.079 | -0.0009 | 106.0863 | 123 | 29.8 | Diethanolamine                 |
| 84.0822  | 102.092 | -0.0014 | 84.0808  | 275 | 50   | Betaine aldehyde cation        |
| 84.0822  | 102.092 | -0.0014 | 84.0808  | 275 | 50   | Betaine aldehyde cation        |
| 84.0822  | 102.092 | -0.0014 | 84.0808  | 212 | 51   | Betaine aldehyde cation        |
| 84.0822  | 102.092 | -0.0014 | 84.0808  | 211 | 49   | Betaine aldehyde cation        |
| 84.0822  | 102.092 | -0.0014 | 84.0808  | 156 | 54.2 | Betaine aldehyde cation        |
| 84.0822  | 102.092 | -0.0014 | 84.0808  | 152 | 45.8 | Betaine aldehyde cation        |
| 84.0822  | 102.092 | -0.0014 | 84.0808  | 139 | 51   | Betaine aldehyde cation        |
| 84.0822  | 102.092 | -0.0014 | 84.0808  | 138 | 49   | Betaine aldehyde cation        |
| 186.0588 | 163.084 | 0.0149  | 186.0737 | 196 | 94.9 | N,N-Bis(2-hydroxyethyl)glycine |
| 186.0588 | 163.084 | 0.0149  | 186.0737 | 144 | 94.9 | N,N-Bis(2-hydroxyethyl)glycine |
| 186.0588 | 203.091 | 0.0285  | 186.0873 | 77  | 5.1  | Ala-Asn                        |
| 186.0588 | 163.084 | 0.0149  | 186.0737 | 116 | 100  | N,N-Bis(2-hydroxyethyl)glycine |
| 118.0873 | 117.079 | -0.001  | 118.0863 | 323 | 34   | Betaine                        |
| 118.0873 | 117.079 | -0.001  | 118.0863 | 319 | 34   | Betaine                        |
| 118.0873 | 117.079 | -0.001  | 118.0863 | 318 | 34   | Betaine                        |
| 118.0873 | 117.079 | -0.001  | 118.0863 | 280 | 62.3 | Betaine                        |
| 118.0873 | 117.079 | -0.001  | 118.0863 | 276 | 62.3 | Betaine                        |
| 118.0873 | 117.079 | -0.001  | 118.0863 | 276 | 62.3 | Betaine                        |
| 118.0873 | 117.079 | -0.001  | 118.0863 | 367 | 35.9 | Betaine                        |
| 118.0873 | 117.079 | -0.001  | 118.0863 | 366 | 35.9 | Betaine                        |
| 118.0873 | 117.079 | -0.001  | 118.0863 | 365 | 35.9 | Betaine                        |
| 97.0774  | 114.104 | 0.0238  | 97.1012  | 30  | 24.4 | Cyclohexanol, 1-methyl-        |
| 97.0774  | 114.104 | 0.0238  | 97.1012  | 22  | 18.2 | Cycloheptanol                  |
| 97.0774  | 114.104 | 0.0238  | 97.1012  | 17  | 14.6 | Cyclohexanemethanol            |
| 106.0872 | 105     | 0       | 106.09   | 153 | 75.2 | Diethanolamine                 |
| 106.0872 | 105.079 | -0.0009 | 106.0863 | 117 | 18.6 | Diethanolamine                 |
| 106.0872 | 105.079 | -0.0009 | 106.0863 | 116 | 18.6 | Diethanolamine                 |
| 84.0822  | 102.092 | -0.0014 | 84.0808  | 286 | 50   | Betaine aldehyde cation        |
| 84.0822  | 102.092 | -0.0014 | 84.0808  | 286 | 50   | Betaine aldehyde cation        |
| 84.0822  | 102.092 | -0.0014 | 84.0808  | 238 | 50   | Betaine aldehyde cation        |
| 84.0822  | 102.092 | -0.0014 | 84.0808  | 238 | 50   | Betaine aldehyde cation        |
| 84.0822  | 102.092 | -0.0014 | 84.0808  | 164 | 54.2 | Betaine aldehyde cation        |
| 84.0822  | 102.092 | -0.0014 | 84.0808  | 160 | 45.8 | Betaine aldehyde cation        |
| 118.0873 | 117.079 | -0.001  | 118.0863 | 293 | 32.4 | Betaine                        |

|          |         |         |          |     |      |                                 |
|----------|---------|---------|----------|-----|------|---------------------------------|
| 118.0873 | 117.079 | -0.001  | 118.0863 | 293 | 32.4 | Betaine                         |
| 118.0873 | 117.079 | -0.001  | 118.0863 | 292 | 32.4 | Betaine                         |
| 118.0873 | 117.079 | -0.001  | 118.0863 | 327 | 39.4 | Betaine                         |
| 118.0873 | 117.079 | -0.001  | 118.0863 | 324 | 39.4 | Betaine                         |
| 118.0873 | 117.079 | -0.001  | 118.0863 | 324 | 39.4 | Betaine                         |
| 118.0873 | 117.079 | -0.001  | 118.0863 | 362 | 44.4 | Betaine                         |
| 118.0873 | 117.079 | -0.001  | 118.0863 | 361 | 44.4 | Betaine                         |
| 118.0873 | 117.079 | -0.001  | 118.0863 | 360 | 44.4 | Betaine                         |
| 186.0588 | 203.091 | 0.0285  | 186.0873 | 65  | 71.9 | Ala-Asn                         |
| 186.0588 | 163.084 | 0.0149  | 186.0737 | 25  | 16.7 | N,N-Bis(2-hydroxyethyl)glycine  |
| 186.0588 | 168.042 | 0.0173  | 186.0761 | 14  | 11.4 | 3-Hydroxy-4-methoxybenzoic acid |
| 186.0588 | 163.084 | 0.0149  | 186.0737 | 144 | 100  | N,N-Bis(2-hydroxyethyl)glycine  |
| 186.0588 | 370.196 | 0.0467  | 186.1055 | 65  | 100  | Ser-His-Lys                     |
| 118.0873 | 117.079 | -0.001  | 118.0863 | 343 | 53.4 | Betaine                         |
| 118.0873 | 117.079 | -0.001  | 118.0863 | 342 | 53.4 | Betaine                         |
| 118.0873 | 117.079 | -0.001  | 118.0863 | 339 | 53.4 | Betaine                         |
| 118.0873 | 117.079 | -0.001  | 118.0863 | 309 | 70.6 | Betaine                         |
| 118.0873 | 117.079 | -0.001  | 118.0863 | 309 | 70.6 | Betaine                         |
| 118.0873 | 117.079 | -0.001  | 118.0863 | 300 | 70.6 | Betaine                         |
| 118.0873 | 117.079 | -0.001  | 118.0863 | 299 | 66.6 | Betaine                         |
| 118.0873 | 117.079 | -0.001  | 118.0863 | 298 | 66.6 | Betaine                         |
| 118.0873 | 117.079 | -0.001  | 118.0863 | 291 | 66.6 | Betaine                         |
| 97.0774  | 114.104 | 0.0238  | 97.1012  | 30  | 24.2 | Cyclohexanol, 1-methyl-         |
| 97.0774  | 114.104 | 0.0238  | 97.1012  | 24  | 19   | Cyclohexanemethanol             |
| 97.0774  | 114.104 | 0.0238  | 97.1012  | 21  | 16.8 | Cycloheptanol                   |
| 97.0774  | 114.104 | 0.0238  | 97.1012  | 46  | 23.4 | Cyclohexanol, 4-methyl-, trans- |
| 97.0774  | 114.104 | 0.0238  | 97.1012  | 44  | 21.6 | Cyclohexanol, 2-methyl-, trans- |
| 97.0774  | 114.104 | 0.0238  | 97.1012  | 39  | 17.4 | Cyclohexanemethanol             |
| 106.0872 | 105     | 0       | 106.09   | 165 | 71.4 | Diethanolamine                  |
| 106.0872 | 105.079 | -0.0009 | 106.0863 | 128 | 17.4 | Diethanolamine                  |
| 106.0872 | 105.079 | -0.0009 | 106.0863 | 128 | 17.4 | Diethanolamine                  |
| 106.0872 | 105     | 0       | 106.09   | 190 | 57.5 | Diethanolamine                  |
| 106.0872 | 105.079 | -0.0009 | 106.0863 | 174 | 33.1 | Diethanolamine                  |
| 106.0872 | 105.079 | -0.0009 | 106.0863 | 173 | 33.1 | Diethanolamine                  |
| 84.0822  | 102.092 | -0.0014 | 84.0808  | 250 | 54.2 | Betaine aldehyde cation         |
| 84.0822  | 102.092 | -0.0014 | 84.0808  | 246 | 45.8 | Betaine aldehyde cation         |
| 84.0822  | 102.092 | -0.0014 | 84.0808  | 231 | 53.1 | Betaine aldehyde cation         |
| 84.0822  | 102.092 | -0.0014 | 84.0808  | 228 | 46.9 | Betaine aldehyde cation         |
| 84.0822  | 102.092 | -0.0014 | 84.0808  | 104 | 51   | Betaine aldehyde cation         |
| 84.0822  | 102.092 | -0.0014 | 84.0808  | 103 | 49   | Betaine aldehyde cation         |
| 186.0588 | 203.091 | 0.0285  | 186.0873 | 36  | 100  | Ala-Asn                         |
| 118.0873 | 117.079 | -0.001  | 118.0863 | 372 | 44.3 | Betaine                         |
| 118.0873 | 117.079 | -0.001  | 118.0863 | 372 | 44.3 | Betaine                         |
| 118.0873 | 117.079 | -0.001  | 118.0863 | 364 | 44.3 | Betaine                         |
| 118.0873 | 117.079 | -0.001  | 118.0863 | 267 | 58.4 | Betaine                         |
| 118.0873 | 117.079 | -0.001  | 118.0863 | 266 | 58.4 | Betaine                         |

|          |         |         |          |     |      |                                       |
|----------|---------|---------|----------|-----|------|---------------------------------------|
| 118.0873 | 117.079 | -0.001  | 118.0863 | 264 | 58.4 | Betaine                               |
| 118.0873 | 117.079 | -0.001  | 118.0863 | 260 | 92.5 | Betaine                               |
| 118.0873 | 117.079 | -0.001  | 118.0863 | 260 | 92.5 | Betaine                               |
| 118.0873 | 117.079 | -0.001  | 118.0863 | 259 | 92.5 | Betaine                               |
| 106.0872 | 105     | 0       | 106.09   | 157 | 73.2 | Diethanolamine                        |
| 106.0872 | 105.079 | -0.0009 | 106.0863 | 127 | 20.4 | Diethanolamine                        |
| 106.0872 | 105.079 | -0.0009 | 106.0863 | 126 | 20.4 | Diethanolamine                        |
| 106.0872 | 105     | 0       | 106.09   | 155 | 79.3 | Diethanolamine                        |
| 106.0872 | 105.079 | -0.0009 | 106.0863 | 122 | 20.7 | Diethanolamine                        |
| 106.0872 | 105.079 | -0.0009 | 106.0863 | 122 | 20.7 | Diethanolamine                        |
| 84.0822  | 102.092 | -0.0014 | 84.0808  | 262 | 52   | Betaine aldehyde cation               |
| 84.0822  | 102.092 | -0.0014 | 84.0808  | 260 | 48   | Betaine aldehyde cation               |
| 84.0822  | 102.092 | -0.0014 | 84.0808  | 233 | 52   | Betaine aldehyde cation               |
| 84.0822  | 102.092 | -0.0014 | 84.0808  | 231 | 48   | Betaine aldehyde cation               |
| 84.0822  | 102.092 | -0.0014 | 84.0808  | 188 | 52   | Betaine aldehyde cation               |
| 84.0822  | 102.092 | -0.0014 | 84.0808  | 186 | 48   | Betaine aldehyde cation               |
| 186.0588 | 163.084 | 0.0149  | 186.0737 | 139 | 77.2 | N,N-Bis(2-hydroxyethyl)glycine        |
| 186.0588 | 370.196 | 0.0467  | 186.1055 | 66  | 10.5 | Ser-His-Lys                           |
| 186.0588 | 370.196 | 0.0467  | 186.1055 | 51  | 6.4  | Ser-His-Lys                           |
| 186.0588 | 163.084 | 0.0149  | 186.0737 | 137 | 86.6 | N,N-Bis(2-hydroxyethyl)glycine        |
| 186.0588 | 370.196 | 0.0467  | 186.1055 | 70  | 13.4 | Ser-His-Lys                           |
| 186.0588 | 163.084 | 0.0149  | 186.0737 | 151 | 92.7 | N,N-Bis(2-hydroxyethyl)glycine        |
| 186.0588 | 370.196 | 0.0467  | 186.1055 | 54  | 7.3  | Ser-His-Lys                           |
| 118.0873 | 117.079 | -0.001  | 118.0863 | 345 | 31.4 | Betaine                               |
| 118.0873 | 117.079 | -0.001  | 118.0863 | 345 | 31.4 | Betaine                               |
| 118.0873 | 117.079 | -0.001  | 118.0863 | 342 | 31.4 | Betaine                               |
| 118.0873 | 117.079 | -0.001  | 118.0863 | 309 | 98.8 | Betaine                               |
| 118.0873 | 117.079 | -0.001  | 118.0863 | 307 | 98.8 | Betaine                               |
| 118.0873 | 117.079 | -0.001  | 118.0863 | 300 | 98.8 | Betaine                               |
| 118.0873 | 117.079 | -0.001  | 118.0863 | 351 | 98.7 | Betaine                               |
| 118.0873 | 117.079 | -0.001  | 118.0863 | 350 | 98.7 | Betaine                               |
| 118.0873 | 117.079 | -0.001  | 118.0863 | 347 | 98.7 | Betaine                               |
| 97.0774  | 114.104 | 0.0238  | 97.1012  | 16  | 39.8 | Cyclohexanol, 4-methyl-, trans-       |
| 97.0774  | 114.104 | 0.0238  | 97.1012  | 14  | 39.8 | Cyclohexanol, 4-methyl-, trans-       |
| 97.0774  | 114.104 | 0.0238  | 97.1012  | 10  | 31.3 | Cyclopentanemethanol, .alpha.-methyl- |
| 106.0872 | 105     | 0       | 106.09   | 154 | 77.7 | Diethanolamine                        |
| 106.0872 | 105.079 | -0.0009 | 106.0863 | 121 | 20.3 | Diethanolamine                        |
| 106.0872 | 105.079 | -0.0009 | 106.0863 | 121 | 20.3 | Diethanolamine                        |
| 106.0872 | 105     | 0       | 106.09   | 220 | 72.3 | Diethanolamine                        |
| 106.0872 | 105.079 | -0.0009 | 106.0863 | 196 | 24.2 | Diethanolamine                        |
| 106.0872 | 105.079 | -0.0009 | 106.0863 | 196 | 24.2 | Diethanolamine                        |
| 84.0822  | 102.092 | -0.0014 | 84.0808  | 249 | 50   | Betaine aldehyde cation               |
| 84.0822  | 102.092 | -0.0014 | 84.0808  | 249 | 50   | Betaine aldehyde cation               |
| 84.0822  | 102.092 | -0.0014 | 84.0808  | 262 | 50   | Betaine aldehyde cation               |
| 84.0822  | 102.092 | -0.0014 | 84.0808  | 262 | 50   | Betaine aldehyde cation               |
| 84.0822  | 102.092 | -0.0014 | 84.0808  | 174 | 51   | Betaine aldehyde cation               |

|          |         |         |          |     |      |                                 |
|----------|---------|---------|----------|-----|------|---------------------------------|
| 84.0822  | 102.092 | -0.0014 | 84.0808  | 173 | 49   | Betaine aldehyde cation         |
| 97.0774  | 114.104 | 0.0238  | 97.1012  | 29  | 22.4 | Cyclohexanol, 1-methyl-         |
| 97.0774  | 114.104 | 0.0238  | 97.1012  | 25  | 18.9 | Cyclohexanol, 4-methyl-, trans- |
| 97.0774  | 114.104 | 0.0238  | 97.1012  | 20  | 15.3 | Cycloheptanol                   |
| 106.0872 | 105     | 0       | 106.09   | 157 | 75   | Diethanolamine                  |
| 106.0872 | 105.079 | -0.0009 | 106.0863 | 124 | 19.6 | Diethanolamine                  |
| 106.0872 | 105.079 | -0.0009 | 106.0863 | 123 | 19.6 | Diethanolamine                  |
| 84.0822  | 102.092 | -0.0014 | 84.0808  | 267 | 51   | Betaine aldehyde cation         |
| 84.0822  | 102.092 | -0.0014 | 84.0808  | 266 | 49   | Betaine aldehyde cation         |
| 84.0822  | 102.092 | -0.0014 | 84.0808  | 233 | 53.1 | Betaine aldehyde cation         |
| 84.0822  | 102.092 | -0.0014 | 84.0808  | 230 | 46.9 | Betaine aldehyde cation         |
| 84.0822  | 102.092 | -0.0014 | 84.0808  | 137 | 50   | Betaine aldehyde cation         |
| 84.0822  | 102.092 | -0.0014 | 84.0808  | 137 | 50   | Betaine aldehyde cation         |
| 84.0822  | 102.092 | -0.0014 | 84.0808  | 155 | 54.2 | Betaine aldehyde cation         |
| 84.0822  | 102.092 | -0.0014 | 84.0808  | 151 | 45.8 | Betaine aldehyde cation         |
| 186.0588 | 163.084 | 0.0149  | 186.0737 | 170 | 100  | N,N-Bis(2-hydroxyethyl)glycine  |
| 186.0588 | 163.084 | 0.0149  | 186.0737 | 155 | 100  | N,N-Bis(2-hydroxyethyl)glycine  |
| 186.0588 | 370.196 | 0.0467  | 186.1055 | 59  | 100  | Ser-His-Lys                     |
| 118.0873 | 117.079 | -0.001  | 118.0863 | 331 | 96.2 | Betaine                         |
| 118.0873 | 117.079 | -0.001  | 118.0863 | 330 | 96.2 | Betaine                         |
| 118.0873 | 117.079 | -0.001  | 118.0863 | 322 | 96.2 | Betaine                         |
| 118.0873 | 117.079 | -0.001  | 118.0863 | 290 | 65.8 | Betaine                         |
| 118.0873 | 117.079 | -0.001  | 118.0863 | 283 | 65.8 | Betaine                         |
| 118.0873 | 117.079 | -0.001  | 118.0863 | 276 | 65.8 | Betaine                         |
| 118.0873 | 117.079 | -0.001  | 118.0863 | 352 | 54   | Betaine                         |
| 118.0873 | 117.079 | -0.001  | 118.0863 | 352 | 54   | Betaine                         |
| 118.0873 | 117.079 | -0.001  | 118.0863 | 351 | 54   | Betaine                         |
| 97.0774  | 114.104 | 0.0238  | 97.1012  | 82  | 19.4 | Cyclohexanol, 2-methyl-, trans- |
| 97.0774  | 114.104 | 0.0238  | 97.1012  | 82  | 19.4 | Cyclohexanol, 4-methyl-, trans- |
| 97.0774  | 114.104 | 0.0238  | 97.1012  | 82  | 19.4 | Cyclohexanol, 4-methyl-, trans- |
| 106.0872 | 105     | 0       | 106.09   | 159 | 77.1 | Diethanolamine                  |
| 106.0872 | 105.079 | -0.0009 | 106.0863 | 118 | 17.6 | Diethanolamine                  |
| 106.0872 | 105.079 | -0.0009 | 106.0863 | 118 | 17.6 | Diethanolamine                  |
| 106.0872 | 105     | 0       | 106.09   | 154 | 80.2 | Diethanolamine                  |
| 106.0872 | 105.079 | -0.0009 | 106.0863 | 118 | 19.8 | Diethanolamine                  |
| 106.0872 | 105.079 | -0.0009 | 106.0863 | 117 | 19.8 | Diethanolamine                  |
| 106.0872 | 105     | 0       | 106.09   | 159 | 76.1 | Diethanolamine                  |
| 106.0872 | 105.079 | -0.0009 | 106.0863 | 129 | 21.1 | Diethanolamine                  |
| 106.0872 | 105.079 | -0.0009 | 106.0863 | 129 | 21.1 | Diethanolamine                  |
| 84.0822  | 102.092 | -0.0014 | 84.0808  | 298 | 56.6 | Betaine aldehyde cation         |
| 84.0822  | 102.092 | -0.0014 | 84.0808  | 291 | 43.4 | Betaine aldehyde cation         |
| 84.0822  | 102.092 | -0.0014 | 84.0808  | 245 | 52   | Betaine aldehyde cation         |
| 84.0822  | 102.092 | -0.0014 | 84.0808  | 243 | 48   | Betaine aldehyde cation         |
| 84.0822  | 102.092 | -0.0014 | 84.0808  | 236 | 52   | Betaine aldehyde cation         |
| 84.0822  | 102.092 | -0.0014 | 84.0808  | 234 | 48   | Betaine aldehyde cation         |
| 118.0873 | 117.079 | -0.001  | 118.0863 | 383 | 45.4 | Betaine                         |
| 118.0873 | 117.079 | -0.001  | 118.0863 | 382 | 45.4 | Betaine                         |



|          |         |         |          |     |      |                                |
|----------|---------|---------|----------|-----|------|--------------------------------|
| 118.0873 | 117.079 | -0.001  | 118.0863 | 378 | 45.4 | Betaine                        |
| 118.0873 | 117.079 | -0.001  | 118.0863 | 335 | 58.5 | Betaine                        |
| 118.0873 | 117.079 | -0.001  | 118.0863 | 333 | 58.5 | Betaine                        |
| 118.0873 | 117.079 | -0.001  | 118.0863 | 331 | 58.5 | Betaine                        |
| 118.0873 | 117.079 | -0.001  | 118.0863 | 354 | 35.4 | Betaine                        |
| 118.0873 | 117.079 | -0.001  | 118.0863 | 351 | 35.4 | Betaine                        |
| 118.0873 | 117.079 | -0.001  | 118.0863 | 351 | 35.4 | Betaine                        |
| 97.0774  | 114.104 | 0.0238  | 97.1012  | 30  | 23.8 | Cyclohexanol, 1-methyl-        |
| 97.0774  | 114.104 | 0.0238  | 97.1012  | 24  | 18.7 | Cyclohexanemethanol            |
| 97.0774  | 114.104 | 0.0238  | 97.1012  | 22  | 17.3 | Cycloheptanol                  |
| 106.0872 | 105     | 0       | 106.09   | 156 | 79.6 | Diethanolamine                 |
| 106.0872 | 105.079 | -0.0009 | 106.0863 | 122 | 20.4 | Diethanolamine                 |
| 106.0872 | 105.079 | -0.0009 | 106.0863 | 121 | 20.4 | Diethanolamine                 |
| 106.0872 | 105     | 0       | 106.09   | 159 | 75   | Diethanolamine                 |
| 106.0872 | 105.079 | -0.0009 | 106.0863 | 123 | 18.5 | Diethanolamine                 |
| 106.0872 | 105.079 | -0.0009 | 106.0863 | 123 | 18.5 | Diethanolamine                 |
| 106.0872 | 105     | 0       | 106.09   | 155 | 79.6 | Diethanolamine                 |
| 106.0872 | 105.079 | -0.0009 | 106.0863 | 121 | 20.4 | Diethanolamine                 |
| 106.0872 | 105.079 | -0.0009 | 106.0863 | 121 | 20.4 | Diethanolamine                 |
| 84.0822  | 102.092 | -0.0014 | 84.0808  | 275 | 53.1 | Betaine aldehyde cation        |
| 84.0822  | 102.092 | -0.0014 | 84.0808  | 272 | 46.9 | Betaine aldehyde cation        |
| 84.0822  | 102.092 | -0.0014 | 84.0808  | 253 | 50   | Betaine aldehyde cation        |
| 84.0822  | 102.092 | -0.0014 | 84.0808  | 253 | 50   | Betaine aldehyde cation        |
| 84.0822  | 102.092 | -0.0014 | 84.0808  | 143 | 51   | Betaine aldehyde cation        |
| 84.0822  | 102.092 | -0.0014 | 84.0808  | 142 | 49   | Betaine aldehyde cation        |
| 186.0588 | 163.084 | 0.0149  | 186.0737 | 117 | 100  | N,N-Bis(2-hydroxyethyl)glycine |
| 186.0588 | 163.084 | 0.0149  | 186.0737 | 148 | 100  | N,N-Bis(2-hydroxyethyl)glycine |
| 186.0588 | 163.084 | 0.0149  | 186.0737 | 151 | 100  | N,N-Bis(2-hydroxyethyl)glycine |
| 118.0873 | 117.079 | -0.001  | 118.0863 | 317 | 32.4 | Betaine                        |
| 118.0873 | 117.079 | -0.001  | 118.0863 | 317 | 32.4 | Betaine                        |
| 118.0873 | 117.079 | -0.001  | 118.0863 | 314 | 32.4 | Betaine                        |
| 118.0873 | 117.079 | -0.001  | 118.0863 | 282 | 61.1 | Betaine                        |
| 118.0873 | 117.079 | -0.001  | 118.0863 | 282 | 61.1 | Betaine                        |
| 118.0873 | 117.079 | -0.001  | 118.0863 | 278 | 61.1 | Betaine                        |
| 118.0873 | 117.079 | -0.001  | 118.0863 | 344 | 59.6 | Betaine                        |
| 118.0873 | 117.079 | -0.001  | 118.0863 | 341 | 59.6 | Betaine                        |
| 118.0873 | 117.079 | -0.001  | 118.0863 | 338 | 59.6 | Betaine                        |
| 106.0872 | 105     | 0       | 106.09   | 158 | 78.6 | Diethanolamine                 |
| 106.0872 | 105.079 | -0.0009 | 106.0863 | 127 | 21.4 | Diethanolamine                 |
| 106.0872 | 105.079 | -0.0009 | 106.0863 | 127 | 21.4 | Diethanolamine                 |
| 106.0872 | 105     | 0       | 106.09   | 157 | 75.2 | Diethanolamine                 |
| 106.0872 | 105.079 | -0.0009 | 106.0863 | 124 | 19.7 | Diethanolamine                 |
| 106.0872 | 105.079 | -0.0009 | 106.0863 | 124 | 19.7 | Diethanolamine                 |
| 106.0872 | 105.079 | -0.0009 | 106.0863 | 115 | 100  | Diethanolamine                 |
| 106.0872 | 105.079 | -0.0009 | 106.0863 | 114 | 100  | Diethanolamine                 |
| 106.0872 | 105.079 | -0.0009 | 106.0863 | 113 | 100  | Diethanolamine                 |
| 84.0822  | 102.092 | -0.0014 | 84.0808  | 281 | 54.2 | Betaine aldehyde cation        |

|          |         |         |          |     |      |                                 |
|----------|---------|---------|----------|-----|------|---------------------------------|
| 84.0822  | 102.092 | -0.0014 | 84.0808  | 277 | 45.8 | Betaine aldehyde cation         |
| 84.0822  | 102.092 | -0.0014 | 84.0808  | 211 | 50   | Betaine aldehyde cation         |
| 84.0822  | 102.092 | -0.0014 | 84.0808  | 211 | 50   | Betaine aldehyde cation         |
| 84.0822  | 102.092 | -0.0014 | 84.0808  | 145 | 51   | Betaine aldehyde cation         |
| 84.0822  | 102.092 | -0.0014 | 84.0808  | 144 | 49   | Betaine aldehyde cation         |
| 186.0588 | 370.196 | 0.0467  | 186.1055 | 43  | 100  | Ser-His-Lys                     |
| 186.0588 | 370.196 | 0.0467  | 186.1055 | 68  | 100  | Ser-His-Lys                     |
| 106.0872 | 105     | 0       | 106.09   | 159 | 79.6 | Diethanolamine                  |
| 106.0872 | 105.079 | -0.0009 | 106.0863 | 125 | 20.4 | Diethanolamine                  |
| 106.0872 | 105.079 | -0.0009 | 106.0863 | 125 | 20.4 | Diethanolamine                  |
| 106.0872 | 105     | 0       | 106.09   | 135 | 76.6 | Diethanolamine                  |
| 106.0872 | 105.079 | -0.0009 | 106.0863 | 110 | 23.4 | Diethanolamine                  |
| 106.0872 | 105.079 | -0.0009 | 106.0863 | 108 | 23.4 | Diethanolamine                  |
| 148.0974 | 147.053 | -0.037  | 148.0604 | 93  | 56.5 | O-Acetyl-L-serine               |
| 148.0974 | 147     | -0.04   | 148.06   | 68  | 17.2 | O-acetyl-L-serine hydrochloride |
| 148.0974 | 147     | -0.04   | 148.06   | 65  | 15.2 | O-acetyl-L-serine hydrochloride |
| 148.0974 | 147.053 | -0.037  | 148.0604 | 141 | 100  | O-Acetyl-L-serine               |
| 118.0873 | 117.079 | -0.001  | 118.0863 | 384 | 97.4 | Betaine                         |
| 118.0873 | 117.079 | -0.001  | 118.0863 | 382 | 97.4 | Betaine                         |
| 118.0873 | 117.079 | -0.001  | 118.0863 | 377 | 97.4 | Betaine                         |
| 118.0873 | 117.079 | -0.001  | 118.0863 | 281 | 61.2 | Betaine                         |
| 118.0873 | 117.079 | -0.001  | 118.0863 | 278 | 61.2 | Betaine                         |
| 118.0873 | 117.079 | -0.001  | 118.0863 | 275 | 61.2 | Betaine                         |
| 118.0873 | 117.079 | -0.001  | 118.0863 | 294 | 41   | Betaine                         |
| 118.0873 | 117.079 | -0.001  | 118.0863 | 292 | 41   | Betaine                         |
| 118.0873 | 117.079 | -0.001  | 118.0863 | 291 | 41   | Betaine                         |
| 97.0774  | 114.104 | 0.0238  | 97.1012  | 36  | 20.9 | Cyclohexanol, 1-methyl-         |
| 97.0774  | 114.104 | 0.0238  | 97.1012  | 34  | 19.3 | Cyclohexanemethanol             |
| 97.0774  | 114.104 | 0.0238  | 97.1012  | 34  | 19.3 | Cyclohexanol, 4-methyl-, trans- |
| 106.0872 | 105     | 0       | 106.09   | 159 | 75.5 | Diethanolamine                  |
| 106.0872 | 105.079 | -0.0009 | 106.0863 | 123 | 18.7 | Diethanolamine                  |
| 106.0872 | 105.079 | -0.0009 | 106.0863 | 123 | 18.7 | Diethanolamine                  |
| 106.0872 | 105     | 0       | 106.09   | 149 | 77.3 | Diethanolamine                  |
| 106.0872 | 105.079 | -0.0009 | 106.0863 | 122 | 22.7 | Diethanolamine                  |
| 106.0872 | 105.079 | -0.0009 | 106.0863 | 121 | 22.7 | Diethanolamine                  |
| 84.0822  | 102.092 | -0.0014 | 84.0808  | 281 | 51   | Betaine aldehyde cation         |
| 84.0822  | 102.092 | -0.0014 | 84.0808  | 280 | 49   | Betaine aldehyde cation         |
| 84.0822  | 102.092 | -0.0014 | 84.0808  | 247 | 51   | Betaine aldehyde cation         |
| 84.0822  | 102.092 | -0.0014 | 84.0808  | 246 | 49   | Betaine aldehyde cation         |
| 84.0822  | 102.092 | -0.0014 | 84.0808  | 182 | 55.4 | Betaine aldehyde cation         |
| 84.0822  | 102.092 | -0.0014 | 84.0808  | 177 | 44.6 | Betaine aldehyde cation         |
| 186.0588 | 203.091 | 0.0285  | 186.0873 | 99  | 74   | Ala-Asn                         |
| 186.0588 | 163.084 | 0.0149  | 186.0737 | 50  | 15.2 | N,N-Bis(2-hydroxyethyl)glycine  |
| 186.0588 | 370.196 | 0.0467  | 186.1055 | 40  | 10.7 | Ser-His-Lys                     |
| 186.0588 | 163.084 | 0.0149  | 186.0737 | 114 | 100  | N,N-Bis(2-hydroxyethyl)glycine  |
| 186.0588 | 163.084 | 0.0149  | 186.0737 | 83  | 100  | N,N-Bis(2-hydroxyethyl)glycine  |
| 118.0873 | 117.079 | -0.001  | 118.0863 | 272 | 84   | Betaine                         |

|          |         |         |          |     |      |                                 |
|----------|---------|---------|----------|-----|------|---------------------------------|
| 118.0873 | 117.079 | -0.001  | 118.0863 | 270 | 84   | Betaine                         |
| 118.0873 | 117.079 | -0.001  | 118.0863 | 269 | 84   | Betaine                         |
| 118.0873 | 117.079 | -0.001  | 118.0863 | 379 | 47.2 | Betaine                         |
| 118.0873 | 117.079 | -0.001  | 118.0863 | 377 | 47.2 | Betaine                         |
| 118.0873 | 117.079 | -0.001  | 118.0863 | 377 | 47.2 | Betaine                         |
| 118.0873 | 117.079 | -0.001  | 118.0863 | 343 | 96   | Betaine                         |
| 118.0873 | 117.079 | -0.001  | 118.0863 | 334 | 96   | Betaine                         |
| 118.0873 | 117.079 | -0.001  | 118.0863 | 318 | 96   | Betaine                         |
| 118.0873 | 117.079 | -0.001  | 118.0863 | 363 | 53.1 | Betaine                         |
| 118.0873 | 117.079 | -0.001  | 118.0863 | 361 | 53.1 | Betaine                         |
| 118.0873 | 117.079 | -0.001  | 118.0863 | 358 | 53.1 | Betaine                         |
| 97.0774  | 114.104 | 0.0238  | 97.1012  | 43  | 25.5 | Cyclohexanemethanol             |
| 97.0774  | 114.104 | 0.0238  | 97.1012  | 42  | 24.5 | Cyclohexanol, 4-methyl-, trans- |
| 97.0774  | 114.104 | 0.0238  | 97.1012  | 33  | 25.5 | Cyclohexanemethanol             |
| 106.0872 | 105     | 0       | 106.09   | 152 | 77.2 | Diethanolamine                  |
| 106.0872 | 105.079 | -0.0009 | 106.0863 | 121 | 21   | Diethanolamine                  |
| 106.0872 | 105.079 | -0.0009 | 106.0863 | 120 | 21   | Diethanolamine                  |
| 84.0822  | 102.092 | -0.0014 | 84.0808  | 288 | 51   | Betaine aldehyde cation         |
| 84.0822  | 102.092 | -0.0014 | 84.0808  | 287 | 49   | Betaine aldehyde cation         |
| 84.0822  | 102.092 | -0.0014 | 84.0808  | 232 | 50   | Betaine aldehyde cation         |
| 84.0822  | 102.092 | -0.0014 | 84.0808  | 232 | 50   | Betaine aldehyde cation         |
| 84.0822  | 102.092 | -0.0014 | 84.0808  | 125 | 54.2 | Betaine aldehyde cation         |
| 84.0822  | 102.092 | -0.0014 | 84.0808  | 121 | 45.8 | Betaine aldehyde cation         |
| 106.0872 | 105     | 0       | 106.09   | 145 | 78.6 | Diethanolamine                  |
| 106.0872 | 105.079 | -0.0009 | 106.0863 | 114 | 21.4 | Diethanolamine                  |
| 106.0872 | 105.079 | -0.0009 | 106.0863 | 114 | 21.4 | Diethanolamine                  |
| 106.0872 | 105     | 0       | 106.09   | 161 | 79.9 | Diethanolamine                  |
| 106.0872 | 105.079 | -0.0009 | 106.0863 | 126 | 20.1 | Diethanolamine                  |
| 106.0872 | 105.079 | -0.0009 | 106.0863 | 125 | 20.1 | Diethanolamine                  |
| 84.0822  | 102.092 | -0.0014 | 84.0808  | 259 | 50   | Betaine aldehyde cation         |
| 84.0822  | 102.092 | -0.0014 | 84.0808  | 259 | 50   | Betaine aldehyde cation         |
| 84.0822  | 102.092 | -0.0014 | 84.0808  | 207 | 53.1 | Betaine aldehyde cation         |
| 84.0822  | 102.092 | -0.0014 | 84.0808  | 204 | 46.9 | Betaine aldehyde cation         |
| 84.0822  | 102.092 | -0.0014 | 84.0808  | 161 | 54.2 | Betaine aldehyde cation         |
| 84.0822  | 102.092 | -0.0014 | 84.0808  | 157 | 45.8 | Betaine aldehyde cation         |
| 186.0588 | 203.091 | 0.0285  | 186.0873 | 50  | 68.7 | Ala-Asn                         |
| 186.0588 | 370.196 | 0.0467  | 186.1055 | 30  | 31.3 | Ser-His-Lys                     |
| 186.0588 | 163.084 | 0.0149  | 186.0737 | 123 | 100  | N,N-Bis(2-hydroxyethyl)glycine  |
| 118.0873 | 117.079 | -0.001  | 118.0863 | 360 | 59.5 | Betaine                         |
| 118.0873 | 117.079 | -0.001  | 118.0863 | 360 | 59.5 | Betaine                         |
| 118.0873 | 117.079 | -0.001  | 118.0863 | 351 | 59.5 | Betaine                         |
| 118.0873 | 117.079 | -0.001  | 118.0863 | 297 | 64.4 | Betaine                         |
| 118.0873 | 117.079 | -0.001  | 118.0863 | 295 | 64.4 | Betaine                         |
| 118.0873 | 117.079 | -0.001  | 118.0863 | 292 | 64.4 | Betaine                         |
| 118.0873 | 117.079 | -0.001  | 118.0863 | 380 | 48.9 | Betaine                         |
| 118.0873 | 117.079 | -0.001  | 118.0863 | 379 | 48.9 | Betaine                         |
| 118.0873 | 117.079 | -0.001  | 118.0863 | 377 | 48.9 | Betaine                         |

|          |         |         |          |     |      |                                           |
|----------|---------|---------|----------|-----|------|-------------------------------------------|
| 148.0974 | 147     | -0.04   | 148.06   | 35  | 35.1 | N-acetyl-DL-serine                        |
| 148.0974 | 147     | -0.04   | 148.06   | 33  | 32.4 | O-acetyl-L-serine hydrochloride           |
| 148.0974 | 147.053 | -0.037  | 148.0604 | 33  | 32.4 | O-Acetyl-L-serine                         |
| 148.0974 | 147     | -0.04   | 148.06   | 36  | 100  | O-acetyl-L-serine hydrochloride           |
| 148.0974 | 147.053 | -0.037  | 148.0604 | 171 | 100  | O-Acetyl-L-serine                         |
| 148.0974 | 147.053 | -0.037  | 148.0604 | 159 | 100  | O-Acetyl-L-serine                         |
| 148.0974 | 147.053 | -0.037  | 148.0604 | 143 | 100  | O-Acetyl-L-serine                         |
| 393.2988 | 392.293 | 0.0011  | 393.2999 | 41  | 100  | Chenodeoxycholic acid                     |
| 371.2972 | 370.308 | 0.0184  | 371.3156 | 227 | 100  | Hexanedioic acid, bis(2-ethylhexyl) ester |
| 371.2972 | 370.308 | 0.0184  | 371.3156 | 157 | 100  | Hexanedioic acid, bis(2-ethylhexyl) ester |
| 371.2972 | 370.308 | 0.0184  | 371.3156 | 155 | 100  | Hexanedioic acid, bis(2-ethylhexyl) ester |
| 371.2972 | 370.308 | 0.0184  | 371.3156 | 123 | 100  | Hexanedioic acid, bis(2-ethylhexyl) ester |
| 371.2972 | 370.308 | 0.0184  | 371.3156 | 111 | 100  | Hexanedioic acid, bis(2-ethylhexyl) ester |
| 371.2972 | 370.308 | 0.0184  | 371.3156 | 97  | 100  | Hexanedioic acid, bis(2-ethylhexyl) ester |
| 371.2972 | 370.308 | 0.0184  | 371.3156 | 67  | 100  | Hexanedioic acid, bis(2-ethylhexyl) ester |
| 371.2972 | 370.308 | 0.0184  | 371.3156 | 54  | 100  | Hexanedioic acid, bis(2-ethylhexyl) ester |
| 371.2972 | 370.308 | 0.0184  | 371.3156 | 46  | 100  | Hexanedioic acid, bis(2-ethylhexyl) ester |
| 371.2972 | 370.308 | 0.0184  | 371.3156 | 104 | 100  | Hexanedioic acid, bis(2-ethylhexyl) ester |
| 371.2972 | 370.308 | 0.0184  | 371.3156 | 77  | 100  | Hexanedioic acid, bis(2-ethylhexyl) ester |
| 371.2972 | 370.308 | 0.0184  | 371.3156 | 62  | 100  | Hexanedioic acid, bis(2-ethylhexyl) ester |
| 118.0873 | 117.079 | -0.001  | 118.0863 | 372 | 54.7 | Betaine                                   |
| 118.0873 | 117.079 | -0.001  | 118.0863 | 370 | 54.7 | Betaine                                   |
| 118.0873 | 117.079 | -0.001  | 118.0863 | 366 | 54.7 | Betaine                                   |
| 118.0873 | 117.079 | -0.001  | 118.0863 | 339 | 39.5 | Betaine                                   |
| 118.0873 | 117.079 | -0.001  | 118.0863 | 337 | 39.5 | Betaine                                   |
| 118.0873 | 117.079 | -0.001  | 118.0863 | 336 | 39.5 | Betaine                                   |
| 118.0873 | 117.079 | -0.001  | 118.0863 | 354 | 57   | Betaine                                   |
| 118.0873 | 117.079 | -0.001  | 118.0863 | 350 | 57   | Betaine                                   |
| 118.0873 | 117.079 | -0.001  | 118.0863 | 347 | 57   | Betaine                                   |
| 97.0774  | 114.104 | 0.0238  | 97.1012  | 37  | 24.1 | Cyclohexanol, 1-methyl-                   |
| 97.0774  | 114.104 | 0.0238  | 97.1012  | 28  | 17.5 | Cycloheptanol                             |
| 97.0774  | 114.104 | 0.0238  | 97.1012  | 24  | 14.8 | Cyclohexanemethanol                       |
| 106.0872 | 105.079 | -0.0009 | 106.0863 | 120 | 100  | Diethanolamine                            |
| 106.0872 | 105.079 | -0.0009 | 106.0863 | 120 | 100  | Diethanolamine                            |
| 106.0872 | 105.079 | -0.0009 | 106.0863 | 114 | 100  | Diethanolamine                            |

|          |         |         |          |     |      |                                 |
|----------|---------|---------|----------|-----|------|---------------------------------|
| 106.0872 | 105     | 0       | 106.09   | 159 | 78.9 | Diethanolamine                  |
| 106.0872 | 105.079 | -0.0009 | 106.0863 | 127 | 21.1 | Diethanolamine                  |
| 106.0872 | 105.079 | -0.0009 | 106.0863 | 126 | 21.1 | Diethanolamine                  |
| 84.0822  | 102.092 | -0.0014 | 84.0808  | 275 | 51   | Betaine aldehyde cation         |
| 84.0822  | 102.092 | -0.0014 | 84.0808  | 274 | 49   | Betaine aldehyde cation         |
| 84.0822  | 102.092 | -0.0014 | 84.0808  | 218 | 50   | Betaine aldehyde cation         |
| 84.0822  | 102.092 | -0.0014 | 84.0808  | 218 | 50   | Betaine aldehyde cation         |
| 186.0588 | 163.084 | 0.0149  | 186.0737 | 138 | 100  | N,N-Bis(2-hydroxyethyl)glycine  |
| 118.0873 | 117.079 | -0.001  | 118.0863 | 369 | 33.3 | Betaine                         |
| 118.0873 | 117.079 | -0.001  | 118.0863 | 368 | 33.3 | Betaine                         |
| 118.0873 | 117.079 | -0.001  | 118.0863 | 364 | 33.3 | Betaine                         |
| 118.0873 | 117.079 | -0.001  | 118.0863 | 278 | 59.7 | Betaine                         |
| 118.0873 | 117.079 | -0.001  | 118.0863 | 274 | 59.7 | Betaine                         |
| 118.0873 | 117.079 | -0.001  | 118.0863 | 273 | 59.7 | Betaine                         |
| 118.0873 | 117.079 | -0.001  | 118.0863 | 280 | 60.4 | Betaine                         |
| 118.0873 | 117.079 | -0.001  | 118.0863 | 278 | 60.4 | Betaine                         |
| 118.0873 | 117.079 | -0.001  | 118.0863 | 276 | 60.4 | Betaine                         |
| 97.0774  | 114.104 | 0.0238  | 97.1012  | 39  | 24.7 | Cyclohexanol, 4-methyl-, trans- |
| 97.0774  | 114.104 | 0.0238  | 97.1012  | 35  | 20.9 | Cyclohexanol, 1-methyl-         |
| 97.0774  | 114.104 | 0.0238  | 97.1012  | 32  | 24.7 | Cyclohexanol, 4-methyl-, trans- |
| 106.0872 | 105.079 | -0.0009 | 106.0863 | 124 | 100  | Diethanolamine                  |
| 106.0872 | 105.079 | -0.0009 | 106.0863 | 124 | 100  | Diethanolamine                  |
| 106.0872 | 105.079 | -0.0009 | 106.0863 | 123 | 100  | Diethanolamine                  |
| 106.0872 | 105     | 0       | 106.09   | 159 | 75.5 | Diethanolamine                  |
| 106.0872 | 105.079 | -0.0009 | 106.0863 | 125 | 19.4 | Diethanolamine                  |
| 106.0872 | 105.079 | -0.0009 | 106.0863 | 124 | 19.4 | Diethanolamine                  |
| 106.0872 | 105     | 0       | 106.09   | 153 | 80.7 | Diethanolamine                  |
| 106.0872 | 105.079 | -0.0009 | 106.0863 | 115 | 19.3 | Diethanolamine                  |
| 106.0872 | 105.079 | -0.0009 | 106.0863 | 115 | 19.3 | Diethanolamine                  |
| 84.0822  | 102.092 | -0.0014 | 84.0808  | 257 | 51   | Betaine aldehyde cation         |
| 84.0822  | 102.092 | -0.0014 | 84.0808  | 256 | 49   | Betaine aldehyde cation         |
| 84.0822  | 102.092 | -0.0014 | 84.0808  | 228 | 52   | Betaine aldehyde cation         |
| 84.0822  | 102.092 | -0.0014 | 84.0808  | 226 | 48   | Betaine aldehyde cation         |
| 84.0822  | 102.092 | -0.0014 | 84.0808  | 145 | 54.2 | Betaine aldehyde cation         |
| 84.0822  | 102.092 | -0.0014 | 84.0808  | 141 | 45.8 | Betaine aldehyde cation         |
| 84.0822  | 102.092 | -0.0014 | 84.0808  | 156 | 53.1 | Betaine aldehyde cation         |
| 84.0822  | 102.092 | -0.0014 | 84.0808  | 153 | 46.9 | Betaine aldehyde cation         |
| 186.0588 | 370.196 | 0.0467  | 186.1055 | 61  | 100  | Ser-His-Lys                     |
| 186.0588 | 163.084 | 0.0149  | 186.0737 | 164 | 92.8 | N,N-Bis(2-hydroxyethyl)glycine  |
| 186.0588 | 370.196 | 0.0467  | 186.1055 | 66  | 7.2  | Ser-His-Lys                     |
| 106.0872 | 105     | 0       | 106.09   | 155 | 78.9 | Diethanolamine                  |
| 106.0872 | 105.079 | -0.0009 | 106.0863 | 123 | 21.1 | Diethanolamine                  |
| 106.0872 | 105.079 | -0.0009 | 106.0863 | 122 | 21.1 | Diethanolamine                  |
| 106.0872 | 105     | 0       | 106.09   | 157 | 67.3 | Diethanolamine                  |
| 106.0872 | 105.079 | -0.0009 | 106.0863 | 138 | 32.7 | Diethanolamine                  |
| 106.0872 | 105.079 | -0.0009 | 106.0863 | 137 | 32.7 | Diethanolamine                  |
| 84.0822  | 102.092 | -0.0014 | 84.0808  | 267 | 53.1 | Betaine aldehyde cation         |

|          |         |         |          |     |      |                                           |
|----------|---------|---------|----------|-----|------|-------------------------------------------|
| 84.0822  | 102.092 | -0.0014 | 84.0808  | 264 | 46.9 | Betaine aldehyde cation                   |
| 84.0822  | 102.092 | -0.0014 | 84.0808  | 186 | 50   | Betaine aldehyde cation                   |
| 84.0822  | 102.092 | -0.0014 | 84.0808  | 186 | 50   | Betaine aldehyde cation                   |
| 84.0822  | 102.092 | -0.0014 | 84.0808  | 172 | 51   | Betaine aldehyde cation                   |
| 84.0822  | 102.092 | -0.0014 | 84.0808  | 171 | 49   | Betaine aldehyde cation                   |
| 148.0974 | 147.053 | -0.037  | 148.0604 | 22  | 31.5 | O-Acetyl-L-serine                         |
| 148.0974 | 147.053 | -0.037  | 148.0604 | 21  | 31.5 | O-Acetyl-L-serine                         |
| 148.0974 | 147.053 | -0.037  | 148.0604 | 20  | 31.5 | O-Acetyl-L-serine                         |
| 118.0873 | 117.079 | -0.001  | 118.0863 | 412 | 36.3 | Betaine                                   |
| 118.0873 | 117.079 | -0.001  | 118.0863 | 410 | 36.3 | Betaine                                   |
| 118.0873 | 117.079 | -0.001  | 118.0863 | 407 | 36.3 | Betaine                                   |
| 118.0873 | 117.079 | -0.001  | 118.0863 | 295 | 22.8 | Betaine                                   |
| 118.0873 | 117     | 0       | 118.09   | 295 | 22.8 | Betaine                                   |
| 118.0873 | 117.079 | -0.001  | 118.0863 | 294 | 22.8 | Betaine                                   |
| 118.0873 | 117.079 | -0.001  | 118.0863 | 334 | 64.1 | Betaine                                   |
| 118.0873 | 117.079 | -0.001  | 118.0863 | 333 | 64.1 | Betaine                                   |
| 118.0873 | 117.079 | -0.001  | 118.0863 | 328 | 64.1 | Betaine                                   |
| 148.0974 | 147.053 | -0.037  | 148.0604 | 172 | 47   | O-Acetyl-L-serine                         |
| 148.0974 | 147     | -0.04   | 148.06   | 170 | 43.3 | O-acetyl-L-serine hydrochloride           |
| 148.0974 | 147.053 | -0.037  | 148.0604 | 166 | 47   | O-Acetyl-L-serine                         |
| 393.2988 | 392.293 | 0.0011  | 393.2999 | 16  | 100  | Chenodeoxycholic acid                     |
| 393.2988 | 392.293 | 0.0011  | 393.2999 | 15  | 100  | Chenodeoxycholic acid                     |
| 393.2988 | 392.293 | 0.0011  | 393.2999 | 15  | 100  | Chenodeoxycholic acid                     |
| 371.2972 | 370.308 | 0.0184  | 371.3156 | 205 | 100  | Hexanedioic acid, bis(2-ethylhexyl) ester |
| 371.2972 | 370.308 | 0.0184  | 371.3156 | 181 | 100  | Hexanedioic acid, bis(2-ethylhexyl) ester |
| 371.2972 | 370.308 | 0.0184  | 371.3156 | 176 | 100  | Hexanedioic acid, bis(2-ethylhexyl) ester |
| 371.2972 | 370.308 | 0.0184  | 371.3156 | 103 | 100  | Hexanedioic acid, bis(2-ethylhexyl) ester |
| 371.2972 | 370.308 | 0.0184  | 371.3156 | 102 | 100  | Hexanedioic acid, bis(2-ethylhexyl) ester |
| 371.2972 | 370.308 | 0.0184  | 371.3156 | 98  | 100  | Hexanedioic acid, bis(2-ethylhexyl) ester |
| 371.2972 | 370.308 | 0.0184  | 371.3156 | 81  | 100  | Hexanedioic acid, bis(2-ethylhexyl) ester |
| 371.2972 | 370.308 | 0.0184  | 371.3156 | 45  | 100  | Hexanedioic acid, bis(2-ethylhexyl) ester |
| 371.2972 | 370.308 | 0.0184  | 371.3156 | 14  | 100  | Hexanedioic acid, bis(2-ethylhexyl) ester |
| 371.2972 | 370.308 | 0.0184  | 371.3156 | 114 | 100  | Hexanedioic acid, bis(2-ethylhexyl) ester |
| 371.2972 | 370.308 | 0.0184  | 371.3156 | 93  | 100  | Hexanedioic acid, bis(2-ethylhexyl) ester |
| 371.2972 | 370.308 | 0.0184  | 371.3156 | 80  | 100  | Hexanedioic acid, bis(2-ethylhexyl) ester |

|          |         |         |          |     |      |                                |
|----------|---------|---------|----------|-----|------|--------------------------------|
| 118.0873 | 117.079 | -0.001  | 118.0863 | 369 | 67.7 | Betaine                        |
| 118.0873 | 117.079 | -0.001  | 118.0863 | 368 | 67.7 | Betaine                        |
| 118.0873 | 117.079 | -0.001  | 118.0863 | 357 | 67.7 | Betaine                        |
| 118.0873 | 117.079 | -0.001  | 118.0863 | 283 | 62.4 | Betaine                        |
| 118.0873 | 117.079 | -0.001  | 118.0863 | 283 | 62.4 | Betaine                        |
| 118.0873 | 117.079 | -0.001  | 118.0863 | 280 | 62.4 | Betaine                        |
| 118.0873 | 117.079 | -0.001  | 118.0863 | 347 | 61.1 | Betaine                        |
| 118.0873 | 117.079 | -0.001  | 118.0863 | 345 | 61.1 | Betaine                        |
| 118.0873 | 117.079 | -0.001  | 118.0863 | 343 | 61.1 | Betaine                        |
| 106.0872 | 105     | 0       | 106.09   | 158 | 75.7 | Diethanolamine                 |
| 106.0872 | 105.079 | -0.0009 | 106.0863 | 123 | 19   | Diethanolamine                 |
| 106.0872 | 105.079 | -0.0009 | 106.0863 | 122 | 19   | Diethanolamine                 |
| 106.0872 | 105     | 0       | 106.09   | 152 | 74.2 | Diethanolamine                 |
| 106.0872 | 105.079 | -0.0009 | 106.0863 | 118 | 19   | Diethanolamine                 |
| 106.0872 | 105.079 | -0.0009 | 106.0863 | 118 | 19   | Diethanolamine                 |
| 106.0872 | 105     | 0       | 106.09   | 268 | 77.1 | Diethanolamine                 |
| 106.0872 | 105.079 | -0.0009 | 106.0863 | 234 | 19.8 | Diethanolamine                 |
| 106.0872 | 105.079 | -0.0009 | 106.0863 | 232 | 19.8 | Diethanolamine                 |
| 84.0822  | 102.092 | -0.0014 | 84.0808  | 292 | 54.2 | Betaine aldehyde cation        |
| 84.0822  | 102.092 | -0.0014 | 84.0808  | 288 | 45.8 | Betaine aldehyde cation        |
| 84.0822  | 102.092 | -0.0014 | 84.0808  | 260 | 53.1 | Betaine aldehyde cation        |
| 84.0822  | 102.092 | -0.0014 | 84.0808  | 257 | 46.9 | Betaine aldehyde cation        |
| 84.0822  | 102.092 | -0.0014 | 84.0808  | 203 | 56   | Betaine aldehyde cation        |
| 84.0822  | 102.092 | -0.0014 | 84.0808  | 197 | 44   | Betaine aldehyde cation        |
| 186.0588 | 163.084 | 0.0149  | 186.0737 | 158 | 93.4 | N,N-Bis(2-hydroxyethyl)glycine |
| 186.0588 | 163.084 | 0.0149  | 186.0737 | 98  | 93.4 | N,N-Bis(2-hydroxyethyl)glycine |
| 186.0588 | 370.196 | 0.0467  | 186.1055 | 55  | 6.6  | Ser-His-Lys                    |
| 186.0588 | 163.084 | 0.0149  | 186.0737 | 145 | 100  | N,N-Bis(2-hydroxyethyl)glycine |
| 118.0873 | 117.079 | -0.001  | 118.0863 | 333 | 36.4 | Betaine                        |
| 118.0873 | 117.079 | -0.001  | 118.0863 | 331 | 36.4 | Betaine                        |
| 118.0873 | 117.079 | -0.001  | 118.0863 | 326 | 36.4 | Betaine                        |
| 118.0873 | 117.079 | -0.001  | 118.0863 | 333 | 37.8 | Betaine                        |
| 118.0873 | 117.079 | -0.001  | 118.0863 | 331 | 37.8 | Betaine                        |
| 118.0873 | 117.079 | -0.001  | 118.0863 | 329 | 37.8 | Betaine                        |
| 118.0873 | 117.079 | -0.001  | 118.0863 | 380 | 52.3 | Betaine                        |
| 118.0873 | 117.079 | -0.001  | 118.0863 | 379 | 52.3 | Betaine                        |
| 118.0873 | 117.079 | -0.001  | 118.0863 | 377 | 52.3 | Betaine                        |
| 97.0774  | 114.104 | 0.0238  | 97.1012  | 27  | 23.1 | Cyclohexanol, 1-methyl-        |
| 97.0774  | 114.104 | 0.0238  | 97.1012  | 18  | 16.8 | Cycloheptanol                  |
| 97.0774  | 114.104 | 0.0238  | 97.1012  | 16  | 15.5 | Cyclohexanemethanol            |
| 106.0872 | 105     | 0       | 106.09   | 219 | 78.6 | Diethanolamine                 |
| 106.0872 | 105.079 | -0.0009 | 106.0863 | 188 | 21.4 | Diethanolamine                 |
| 106.0872 | 105.079 | -0.0009 | 106.0863 | 187 | 21.4 | Diethanolamine                 |
| 106.0872 | 105     | 0       | 106.09   | 181 | 64.4 | Diethanolamine                 |
| 106.0872 | 105.079 | -0.0009 | 106.0863 | 160 | 27.4 | Diethanolamine                 |
| 106.0872 | 105.079 | -0.0009 | 106.0863 | 159 | 27.4 | Diethanolamine                 |
| 84.0822  | 102.092 | -0.0014 | 84.0808  | 255 | 51   | Betaine aldehyde cation        |

|          |         |         |          |     |      |                                 |
|----------|---------|---------|----------|-----|------|---------------------------------|
| 84.0822  | 102.092 | -0.0014 | 84.0808  | 254 | 49   | Betaine aldehyde cation         |
| 84.0822  | 102.092 | -0.0014 | 84.0808  | 228 | 56   | Betaine aldehyde cation         |
| 84.0822  | 102.092 | -0.0014 | 84.0808  | 222 | 44   | Betaine aldehyde cation         |
| 84.0822  | 102.092 | -0.0014 | 84.0808  | 160 | 53.1 | Betaine aldehyde cation         |
| 84.0822  | 102.092 | -0.0014 | 84.0808  | 157 | 46.9 | Betaine aldehyde cation         |
| 186.0588 | 163.084 | 0.0149  | 186.0737 | 113 | 100  | N,N-Bis(2-hydroxyethyl)glycine  |
| 186.0588 | 163.084 | 0.0149  | 186.0737 | 153 | 100  | N,N-Bis(2-hydroxyethyl)glycine  |
| 106.0872 | 105     | 0       | 106.09   | 158 | 77.9 | Diethanolamine                  |
| 106.0872 | 105.079 | -0.0009 | 106.0863 | 129 | 22.1 | Diethanolamine                  |
| 106.0872 | 105.079 | -0.0009 | 106.0863 | 128 | 22.1 | Diethanolamine                  |
| 106.0872 | 105     | 0       | 106.09   | 159 | 72.3 | Diethanolamine                  |
| 106.0872 | 105.079 | -0.0009 | 106.0863 | 133 | 21.7 | Diethanolamine                  |
| 106.0872 | 105.079 | -0.0009 | 106.0863 | 133 | 21.7 | Diethanolamine                  |
| 106.0872 | 105     | 0       | 106.09   | 144 | 78.2 | Diethanolamine                  |
| 106.0872 | 105.079 | -0.0009 | 106.0863 | 114 | 21.8 | Diethanolamine                  |
| 106.0872 | 105.079 | -0.0009 | 106.0863 | 114 | 21.8 | Diethanolamine                  |
| 84.0822  | 102.092 | -0.0014 | 84.0808  | 262 | 53.1 | Betaine aldehyde cation         |
| 84.0822  | 102.092 | -0.0014 | 84.0808  | 259 | 46.9 | Betaine aldehyde cation         |
| 84.0822  | 102.092 | -0.0014 | 84.0808  | 198 | 53.1 | Betaine aldehyde cation         |
| 84.0822  | 102.092 | -0.0014 | 84.0808  | 195 | 46.9 | Betaine aldehyde cation         |
| 84.0822  | 102.092 | -0.0014 | 84.0808  | 161 | 51   | Betaine aldehyde cation         |
| 84.0822  | 102.092 | -0.0014 | 84.0808  | 160 | 49   | Betaine aldehyde cation         |
| 84.0822  | 102.092 | -0.0014 | 84.0808  | 180 | 52   | Betaine aldehyde cation         |
| 84.0822  | 102.092 | -0.0014 | 84.0808  | 178 | 48   | Betaine aldehyde cation         |
| 186.0588 | 203.091 | 0.0285  | 186.0873 | 83  | 100  | Ala-Asn                         |
| 186.0588 | 370.196 | 0.0467  | 186.1055 | 97  | 100  | Ser-His-Lys                     |
| 186.0588 | 370.196 | 0.0467  | 186.1055 | 81  | 100  | Ser-His-Lys                     |
| 148.0974 | 147     | -0.04   | 148.06   | 13  | 100  | O-acetyl-L-serine hydrochloride |
| 148.0974 | 147.053 | -0.037  | 148.0604 | 56  | 55.5 | O-Acetyl-L-serine               |
| 148.0974 | 147.053 | -0.037  | 148.0604 | 30  | 55.5 | O-Acetyl-L-serine               |
| 148.0974 | 147     | -0.04   | 148.06   | 28  | 16   | O-acetyl-L-serine hydrochloride |
| 148.0974 | 147.053 | -0.037  | 148.0604 | 173 | 76.6 | O-Acetyl-L-serine               |
| 148.0974 | 147.053 | -0.037  | 148.0604 | 162 | 76.6 | O-Acetyl-L-serine               |
| 148.0974 | 147     | -0.04   | 148.06   | 148 | 23.4 | O-acetyl-L-serine hydrochloride |
| 148.0974 | 147.053 | -0.037  | 148.0604 | 129 | 58   | O-Acetyl-L-serine               |
| 148.0974 | 147.053 | -0.037  | 148.0604 | 122 | 58   | O-Acetyl-L-serine               |
| 148.0974 | 147     | -0.04   | 148.06   | 113 | 33.4 | O-acetyl-L-serine hydrochloride |
| 118.0873 | 117.079 | -0.001  | 118.0863 | 356 | 62.8 | Betaine                         |
| 118.0873 | 117.079 | -0.001  | 118.0863 | 353 | 62.8 | Betaine                         |
| 118.0873 | 117.079 | -0.001  | 118.0863 | 347 | 62.8 | Betaine                         |
| 118.0873 | 117.079 | -0.001  | 118.0863 | 334 | 56.8 | Betaine                         |
| 118.0873 | 117.079 | -0.001  | 118.0863 | 332 | 56.8 | Betaine                         |
| 118.0873 | 117.079 | -0.001  | 118.0863 | 331 | 56.8 | Betaine                         |
| 118.0873 | 117.079 | -0.001  | 118.0863 | 341 | 56   | Betaine                         |
| 118.0873 | 117.079 | -0.001  | 118.0863 | 339 | 56   | Betaine                         |
| 118.0873 | 117.079 | -0.001  | 118.0863 | 339 | 56   | Betaine                         |
| 106.0872 | 105     | 0       | 106.09   | 159 | 71.7 | Diethanolamine                  |



|          |         |         |          |     |      |                                 |
|----------|---------|---------|----------|-----|------|---------------------------------|
| 106.0872 | 105.079 | -0.0009 | 106.0863 | 137 | 28.3 | Diethanolamine                  |
| 106.0872 | 105.079 | -0.0009 | 106.0863 | 136 | 28.3 | Diethanolamine                  |
| 106.0872 | 105.079 | -0.0009 | 106.0863 | 109 | 100  | Diethanolamine                  |
| 106.0872 | 105.079 | -0.0009 | 106.0863 | 109 | 100  | Diethanolamine                  |
| 106.0872 | 105.079 | -0.0009 | 106.0863 | 103 | 100  | Diethanolamine                  |
| 84.0822  | 102.092 | -0.0014 | 84.0808  | 284 | 51   | Betaine aldehyde cation         |
| 84.0822  | 102.092 | -0.0014 | 84.0808  | 283 | 49   | Betaine aldehyde cation         |
| 84.0822  | 102.092 | -0.0014 | 84.0808  | 221 | 51   | Betaine aldehyde cation         |
| 84.0822  | 102.092 | -0.0014 | 84.0808  | 220 | 49   | Betaine aldehyde cation         |
| 84.0822  | 102.092 | -0.0014 | 84.0808  | 203 | 52   | Betaine aldehyde cation         |
| 84.0822  | 102.092 | -0.0014 | 84.0808  | 201 | 48   | Betaine aldehyde cation         |
| 118.0873 | 117.079 | -0.001  | 118.0863 | 376 | 50.4 | Betaine                         |
| 118.0873 | 117.079 | -0.001  | 118.0863 | 372 | 50.4 | Betaine                         |
| 118.0873 | 117.079 | -0.001  | 118.0863 | 368 | 50.4 | Betaine                         |
| 118.0873 | 117.079 | -0.001  | 118.0863 | 348 | 97.6 | Betaine                         |
| 118.0873 | 117.079 | -0.001  | 118.0863 | 337 | 97.6 | Betaine                         |
| 118.0873 | 117.079 | -0.001  | 118.0863 | 322 | 97.6 | Betaine                         |
| 118.0873 | 117     | 0       | 118.09   | 348 | 26.1 | Betaine                         |
| 118.0873 | 117.079 | -0.001  | 118.0863 | 344 | 22   | Betaine                         |
| 118.0873 | 117     | 0       | 118.09   | 342 | 20.3 | Betaine                         |
| 84.0822  | 102.092 | -0.0014 | 84.0808  | 231 | 51   | Betaine aldehyde cation         |
| 84.0822  | 102.092 | -0.0014 | 84.0808  | 230 | 49   | Betaine aldehyde cation         |
| 84.0822  | 102.092 | -0.0014 | 84.0808  | 212 | 50   | Betaine aldehyde cation         |
| 84.0822  | 102.092 | -0.0014 | 84.0808  | 212 | 50   | Betaine aldehyde cation         |
| 84.0822  | 102.092 | -0.0014 | 84.0808  | 142 | 54.2 | Betaine aldehyde cation         |
| 84.0822  | 102.092 | -0.0014 | 84.0808  | 138 | 45.8 | Betaine aldehyde cation         |
| 186.0588 | 163.084 | 0.0149  | 186.0737 | 153 | 100  | N,N-Bis(2-hydroxyethyl)glycine  |
| 148.0974 | 147     | -0.04   | 148.06   | 41  | 100  | O-acetyl-L-serine hydrochloride |
| 118.0873 | 117.079 | -0.001  | 118.0863 | 367 | 36.4 | Betaine                         |
| 118.0873 | 117.079 | -0.001  | 118.0863 | 366 | 36.4 | Betaine                         |
| 118.0873 | 117.079 | -0.001  | 118.0863 | 361 | 36.4 | Betaine                         |
| 118.0873 | 117.079 | -0.001  | 118.0863 | 316 | 75   | Betaine                         |
| 118.0873 | 117.079 | -0.001  | 118.0863 | 312 | 75   | Betaine                         |
| 118.0873 | 117.079 | -0.001  | 118.0863 | 301 | 75   | Betaine                         |
| 118.0873 | 117.079 | -0.001  | 118.0863 | 355 | 51.9 | Betaine                         |
| 118.0873 | 117.079 | -0.001  | 118.0863 | 354 | 51.9 | Betaine                         |
| 118.0873 | 117.079 | -0.001  | 118.0863 | 350 | 51.9 | Betaine                         |
| 97.0774  | 114.104 | 0.0238  | 97.1012  | 41  | 100  | Cyclohexanol, 4-methyl-, trans- |
| 97.0774  | 114.104 | 0.0238  | 97.1012  | 48  | 25   | Cyclohexanol, 4-methyl-, trans- |
| 97.0774  | 114.104 | 0.0238  | 97.1012  | 40  | 18.6 | Cyclohexanol, 2-methyl-, trans- |
| 97.0774  | 114.104 | 0.0238  | 97.1012  | 40  | 18.6 | Cyclohexanol, 1-methyl-         |
| 106.0872 | 105     | 0       | 106.09   | 158 | 76.9 | Diethanolamine                  |
| 106.0872 | 105.079 | -0.0009 | 106.0863 | 132 | 23.1 | Diethanolamine                  |
| 106.0872 | 105.079 | -0.0009 | 106.0863 | 131 | 23.1 | Diethanolamine                  |
| 106.0872 | 105     | 0       | 106.09   | 159 | 74.9 | Diethanolamine                  |
| 106.0872 | 105.079 | -0.0009 | 106.0863 | 127 | 20   | Diethanolamine                  |
| 106.0872 | 105.079 | -0.0009 | 106.0863 | 126 | 20   | Diethanolamine                  |

|          |         |         |          |     |      |                                           |
|----------|---------|---------|----------|-----|------|-------------------------------------------|
| 106.0872 | 105     | 0       | 106.09   | 158 | 79.9 | Diethanolamine                            |
| 106.0872 | 105.079 | -0.0009 | 106.0863 | 123 | 20.1 | Diethanolamine                            |
| 106.0872 | 105.079 | -0.0009 | 106.0863 | 123 | 20.1 | Diethanolamine                            |
| 84.0822  | 102.092 | -0.0014 | 84.0808  | 280 | 50   | Betaine aldehyde cation                   |
| 84.0822  | 102.092 | -0.0014 | 84.0808  | 280 | 50   | Betaine aldehyde cation                   |
| 84.0822  | 102.092 | -0.0014 | 84.0808  | 259 | 52   | Betaine aldehyde cation                   |
| 84.0822  | 102.092 | -0.0014 | 84.0808  | 257 | 48   | Betaine aldehyde cation                   |
| 84.0822  | 102.092 | -0.0014 | 84.0808  | 160 | 51   | Betaine aldehyde cation                   |
| 84.0822  | 102.092 | -0.0014 | 84.0808  | 159 | 49   | Betaine aldehyde cation                   |
| 84.0822  | 102.092 | -0.0014 | 84.0808  | 205 | 51   | Betaine aldehyde cation                   |
| 84.0822  | 102.092 | -0.0014 | 84.0808  | 204 | 49   | Betaine aldehyde cation                   |
| 106.0872 | 105     | 0       | 106.09   | 171 | 75.3 | Diethanolamine                            |
| 106.0872 | 105.079 | -0.0009 | 106.0863 | 136 | 18.9 | Diethanolamine                            |
| 106.0872 | 105.079 | -0.0009 | 106.0863 | 135 | 18.9 | Diethanolamine                            |
| 106.0872 | 105     | 0       | 106.09   | 159 | 78.9 | Diethanolamine                            |
| 106.0872 | 105.079 | -0.0009 | 106.0863 | 127 | 21.1 | Diethanolamine                            |
| 106.0872 | 105.079 | -0.0009 | 106.0863 | 126 | 21.1 | Diethanolamine                            |
| 106.0872 | 105     | 0       | 106.09   | 159 | 74.3 | Diethanolamine                            |
| 106.0872 | 105.079 | -0.0009 | 106.0863 | 129 | 20.6 | Diethanolamine                            |
| 106.0872 | 105.079 | -0.0009 | 106.0863 | 128 | 20.6 | Diethanolamine                            |
| 84.0822  | 102.092 | -0.0014 | 84.0808  | 241 | 52   | Betaine aldehyde cation                   |
| 84.0822  | 102.092 | -0.0014 | 84.0808  | 239 | 48   | Betaine aldehyde cation                   |
| 84.0822  | 102.092 | -0.0014 | 84.0808  | 236 | 53.1 | Betaine aldehyde cation                   |
| 84.0822  | 102.092 | -0.0014 | 84.0808  | 233 | 46.9 | Betaine aldehyde cation                   |
| 84.0822  | 102.092 | -0.0014 | 84.0808  | 189 | 56   | Betaine aldehyde cation                   |
| 84.0822  | 102.092 | -0.0014 | 84.0808  | 183 | 44   | Betaine aldehyde cation                   |
| 186.0588 | 163.084 | 0.0149  | 186.0737 | 112 | 83.6 | N,N-Bis(2-hydroxyethyl)glycine            |
| 186.0588 | 163.084 | 0.0149  | 186.0737 | 83  | 83.6 | N,N-Bis(2-hydroxyethyl)glycine            |
| 186.0588 | 203.091 | 0.0285  | 186.0873 | 58  | 16.4 | Ala-Asn                                   |
| 186.0588 | 370.196 | 0.0467  | 186.1055 | 94  | 100  | Ser-His-Lys                               |
| 148.0974 | 147.053 | -0.037  | 148.0604 | 147 | 100  | O-Acetyl-L-serine                         |
| 148.0974 | 147.053 | -0.037  | 148.0604 | 138 | 100  | O-Acetyl-L-serine                         |
| 148.0974 | 147.053 | -0.037  | 148.0604 | 163 | 100  | O-Acetyl-L-serine                         |
| 118.0873 | 117.079 | -0.001  | 118.0863 | 340 | 36   | Betaine                                   |
| 118.0873 | 117.079 | -0.001  | 118.0863 | 336 | 36   | Betaine                                   |
| 118.0873 | 117.079 | -0.001  | 118.0863 | 335 | 36   | Betaine                                   |
| 118.0873 | 117.079 | -0.001  | 118.0863 | 287 | 67.5 | Betaine                                   |
| 118.0873 | 117.079 | -0.001  | 118.0863 | 284 | 67.5 | Betaine                                   |
| 118.0873 | 117.079 | -0.001  | 118.0863 | 282 | 67.5 | Betaine                                   |
| 118.0873 | 117.079 | -0.001  | 118.0863 | 359 | 52.1 | Betaine                                   |
| 118.0873 | 117.079 | -0.001  | 118.0863 | 356 | 52.1 | Betaine                                   |
| 118.0873 | 117.079 | -0.001  | 118.0863 | 355 | 52.1 | Betaine                                   |
| 148.0974 | 147     | -0.04   | 148.06   | 31  | 67.3 | O-acetyl-L-serine hydrochloride           |
| 148.0974 | 147     | -0.04   | 148.06   | 12  | 32.7 | N-acetyl-DL-serine                        |
| 371.2927 | 370.308 | 0.0229  | 371.3156 | 184 | 100  | Hexanedioic acid, bis(2-ethylhexyl) ester |

|          |         |         |          |     |      |                                           |
|----------|---------|---------|----------|-----|------|-------------------------------------------|
| 371.2927 | 370.308 | 0.0229  | 371.3156 | 107 | 100  | Hexanedioic acid, bis(2-ethylhexyl) ester |
| 371.2927 | 370.308 | 0.0229  | 371.3156 | 98  | 100  | Hexanedioic acid, bis(2-ethylhexyl) ester |
| 371.2927 | 370.308 | 0.0229  | 371.3156 | 178 | 76.9 | Hexanedioic acid, bis(2-ethylhexyl) ester |
| 371.2927 | 370.308 | 0.0229  | 371.3156 | 166 | 76.9 | Hexanedioic acid, bis(2-ethylhexyl) ester |
| 371.2927 | 370.308 | 0.0229  | 371.3156 | 130 | 76.9 | Hexanedioic acid, bis(2-ethylhexyl) ester |
| 371.2927 | 370.308 | 0.0229  | 371.3156 | 81  | 100  | Hexanedioic acid, bis(2-ethylhexyl) ester |
| 371.2927 | 370.308 | 0.0229  | 371.3156 | 78  | 100  | Hexanedioic acid, bis(2-ethylhexyl) ester |
| 371.2927 | 370.308 | 0.0229  | 371.3156 | 65  | 100  | Hexanedioic acid, bis(2-ethylhexyl) ester |
| 118.0873 | 117.079 | -0.001  | 118.0863 | 322 | 29.1 | Betaine                                   |
| 118.0873 | 117.079 | -0.001  | 118.0863 | 321 | 29.1 | Betaine                                   |
| 118.0873 | 117.079 | -0.001  | 118.0863 | 318 | 29.1 | Betaine                                   |
| 118.0873 | 117.079 | -0.001  | 118.0863 | 323 | 99   | Betaine                                   |
| 118.0873 | 117.079 | -0.001  | 118.0863 | 321 | 99   | Betaine                                   |
| 118.0873 | 117.079 | -0.001  | 118.0863 | 313 | 99   | Betaine                                   |
| 118.0873 | 117.079 | -0.001  | 118.0863 | 343 | 31.4 | Betaine                                   |
| 118.0873 | 117.079 | -0.001  | 118.0863 | 342 | 31.4 | Betaine                                   |
| 118.0873 | 117.079 | -0.001  | 118.0863 | 339 | 31.4 | Betaine                                   |
| 106.0872 | 105     | 0       | 106.09   | 166 | 71.6 | Diethanolamine                            |
| 106.0872 | 105.079 | -0.0009 | 106.0863 | 135 | 19.5 | Diethanolamine                            |
| 106.0872 | 105.079 | -0.0009 | 106.0863 | 135 | 19.5 | Diethanolamine                            |
| 84.0822  | 102.092 | -0.0014 | 84.0808  | 266 | 56   | Betaine aldehyde cation                   |
| 84.0822  | 102.092 | -0.0014 | 84.0808  | 260 | 44   | Betaine aldehyde cation                   |
| 84.0822  | 102.092 | -0.0014 | 84.0808  | 279 | 51   | Betaine aldehyde cation                   |
| 84.0822  | 102.092 | -0.0014 | 84.0808  | 278 | 49   | Betaine aldehyde cation                   |
| 84.0822  | 102.092 | -0.0014 | 84.0808  | 167 | 51   | Betaine aldehyde cation                   |
| 84.0822  | 102.092 | -0.0014 | 84.0808  | 166 | 49   | Betaine aldehyde cation                   |
| 84.0822  | 102.092 | -0.0014 | 84.0808  | 163 | 51   | Betaine aldehyde cation                   |
| 84.0822  | 102.092 | -0.0014 | 84.0808  | 162 | 49   | Betaine aldehyde cation                   |
| 118.0873 | 117.079 | -0.001  | 118.0863 | 356 | 53.9 | Betaine                                   |
| 118.0873 | 117.079 | -0.001  | 118.0863 | 352 | 53.9 | Betaine                                   |
| 118.0873 | 117.079 | -0.001  | 118.0863 | 349 | 53.9 | Betaine                                   |
| 118.0873 | 117.079 | -0.001  | 118.0863 | 329 | 82.7 | Betaine                                   |
| 118.0873 | 117.079 | -0.001  | 118.0863 | 321 | 82.7 | Betaine                                   |
| 118.0873 | 117.079 | -0.001  | 118.0863 | 306 | 82.7 | Betaine                                   |
| 118.0873 | 117.079 | -0.001  | 118.0863 | 323 | 29.3 | Betaine                                   |
| 118.0873 | 117     | 0       | 118.09   | 320 | 25.9 | Betaine                                   |
| 118.0873 | 117.079 | -0.001  | 118.0863 | 319 | 29.3 | Betaine                                   |
| 97.0774  | 114.104 | 0.0238  | 97.1012  | 49  | 32.3 | Cyclohexanol, 1-methyl-                   |
| 97.0774  | 114.104 | 0.0238  | 97.1012  | 35  | 20.2 | Cycloheptanol                             |

|          |         |         |          |     |      |                                 |
|----------|---------|---------|----------|-----|------|---------------------------------|
| 97.0774  | 114.104 | 0.0238  | 97.1012  | 32  | 17.9 | Cyclohexanol, 4-methyl-, trans- |
| 106.0872 | 105     | 0       | 106.09   | 208 | 76.5 | Diethanolamine                  |
| 106.0872 | 105.079 | -0.0009 | 106.0863 | 174 | 19.6 | Diethanolamine                  |
| 106.0872 | 105.079 | -0.0009 | 106.0863 | 174 | 19.6 | Diethanolamine                  |
| 106.0872 | 105     | 0       | 106.09   | 211 | 77   | Diethanolamine                  |
| 106.0872 | 105.079 | -0.0009 | 106.0863 | 174 | 18.8 | Diethanolamine                  |
| 106.0872 | 105.079 | -0.0009 | 106.0863 | 172 | 18.8 | Diethanolamine                  |
| 84.0822  | 102.092 | -0.0014 | 84.0808  | 319 | 53.1 | Betaine aldehyde cation         |
| 84.0822  | 102.092 | -0.0014 | 84.0808  | 316 | 46.9 | Betaine aldehyde cation         |
| 84.0822  | 102.092 | -0.0014 | 84.0808  | 248 | 53.1 | Betaine aldehyde cation         |
| 84.0822  | 102.092 | -0.0014 | 84.0808  | 245 | 46.9 | Betaine aldehyde cation         |
| 84.0822  | 102.092 | -0.0014 | 84.0808  | 120 | 54.2 | Betaine aldehyde cation         |
| 84.0822  | 102.092 | -0.0014 | 84.0808  | 116 | 45.8 | Betaine aldehyde cation         |
| 186.0588 | 163.084 | 0.0149  | 186.0737 | 205 | 100  | N,N-Bis(2-hydroxyethyl)glycine  |
| 186.0588 | 163.084 | 0.0149  | 186.0737 | 132 | 100  | N,N-Bis(2-hydroxyethyl)glycine  |
| 186.0588 | 163.084 | 0.0149  | 186.0737 | 152 | 100  | N,N-Bis(2-hydroxyethyl)glycine  |
| 97.0774  | 114.104 | 0.0238  | 97.1012  | 33  | 23.1 | Cyclohexanol, 1-methyl-         |
| 97.0774  | 114.104 | 0.0238  | 97.1012  | 26  | 17.7 | Cyclohexanemethanol             |
| 97.0774  | 114.104 | 0.0238  | 97.1012  | 25  | 17.7 | Cyclohexanemethanol             |
| 106.0872 | 105     | 0       | 106.09   | 196 | 78.9 | Diethanolamine                  |
| 106.0872 | 105.079 | -0.0009 | 106.0863 | 164 | 21.1 | Diethanolamine                  |
| 106.0872 | 105.079 | -0.0009 | 106.0863 | 164 | 21.1 | Diethanolamine                  |
| 106.0872 | 105.079 | -0.0009 | 106.0863 | 108 | 100  | Diethanolamine                  |
| 106.0872 | 105.079 | -0.0009 | 106.0863 | 108 | 100  | Diethanolamine                  |
| 106.0872 | 105.079 | -0.0009 | 106.0863 | 108 | 100  | Diethanolamine                  |
| 84.0822  | 102.092 | -0.0014 | 84.0808  | 251 | 54.2 | Betaine aldehyde cation         |
| 84.0822  | 102.092 | -0.0014 | 84.0808  | 247 | 45.8 | Betaine aldehyde cation         |
| 84.0822  | 102.092 | -0.0014 | 84.0808  | 279 | 52   | Betaine aldehyde cation         |
| 84.0822  | 102.092 | -0.0014 | 84.0808  | 277 | 48   | Betaine aldehyde cation         |
| 84.0822  | 102.092 | -0.0014 | 84.0808  | 138 | 51   | Betaine aldehyde cation         |
| 84.0822  | 102.092 | -0.0014 | 84.0808  | 137 | 49   | Betaine aldehyde cation         |
| 186.0588 | 163.084 | 0.0149  | 186.0737 | 116 | 79.3 | N,N-Bis(2-hydroxyethyl)glycine  |
| 186.0588 | 163.084 | 0.0149  | 186.0737 | 96  | 79.3 | N,N-Bis(2-hydroxyethyl)glycine  |
| 186.0588 | 203.091 | 0.0285  | 186.0873 | 83  | 20.7 | Ala-Asn                         |
| 186.0588 | 163.084 | 0.0149  | 186.0737 | 104 | 100  | N,N-Bis(2-hydroxyethyl)glycine  |
| 148.0974 | 147     | -0.04   | 148.06   | 44  | 26.5 | N-acetyl-DL-serine              |
| 148.0974 | 147.053 | -0.037  | 148.0604 | 35  | 19.2 | O-Acetyl-L-serine               |
| 148.0974 | 147     | -0.04   | 148.06   | 35  | 19.2 | O-acetyl-L-serine hydrochloride |
| 148.0974 | 147     | -0.04   | 148.06   | 36  | 28.1 | O-acetyl-L-serine hydrochloride |
| 148.0974 | 147.053 | -0.037  | 148.0604 | 34  | 25.9 | O-Acetyl-L-serine               |
| 148.0974 | 147     | -0.04   | 148.06   | 32  | 23.9 | N-acetyl-DL-serine              |
| 148.0974 | 147.053 | -0.037  | 148.0604 | 103 | 52.8 | O-Acetyl-L-serine               |
| 148.0974 | 147.053 | -0.037  | 148.0604 | 97  | 52.8 | O-Acetyl-L-serine               |
| 148.0974 | 147     | -0.04   | 148.06   | 92  | 36.2 | O-acetyl-L-serine hydrochloride |
| 118.0873 | 117.079 | -0.001  | 118.0863 | 362 | 33.5 | Betaine                         |
| 118.0873 | 117.079 | -0.001  | 118.0863 | 362 | 33.5 | Betaine                         |
| 118.0873 | 117.079 | -0.001  | 118.0863 | 358 | 33.5 | Betaine                         |

|          |         |         |          |     |      |                                 |
|----------|---------|---------|----------|-----|------|---------------------------------|
| 118.0873 | 117.079 | -0.001  | 118.0863 | 321 | 49.9 | Betaine                         |
| 118.0873 | 117.079 | -0.001  | 118.0863 | 319 | 49.9 | Betaine                         |
| 118.0873 | 117.079 | -0.001  | 118.0863 | 318 | 49.9 | Betaine                         |
| 118.0873 | 117.079 | -0.001  | 118.0863 | 337 | 62   | Betaine                         |
| 118.0873 | 117.079 | -0.001  | 118.0863 | 334 | 62   | Betaine                         |
| 118.0873 | 117.079 | -0.001  | 118.0863 | 330 | 62   | Betaine                         |
| 148.0974 | 147     | -0.04   | 148.06   | 88  | 36.4 | O-acetyl-L-serine hydrochloride |
| 148.0974 | 147.053 | -0.037  | 148.0604 | 80  | 27.2 | O-Acetyl-L-serine               |
| 148.0974 | 147     | -0.04   | 148.06   | 73  | 20.8 | O-acetyl-L-serine hydrochloride |
| 148.0974 | 147.053 | -0.037  | 148.0604 | 114 | 100  | O-Acetyl-L-serine               |
| 148.0974 | 147.053 | -0.037  | 148.0604 | 107 | 100  | O-Acetyl-L-serine               |
| 148.0974 | 147.053 | -0.037  | 148.0604 | 151 | 52.1 | O-Acetyl-L-serine               |
| 148.0974 | 147.053 | -0.037  | 148.0604 | 148 | 52.1 | O-Acetyl-L-serine               |
| 148.0974 | 147.053 | -0.037  | 148.0604 | 142 | 52.1 | O-Acetyl-L-serine               |
| 118.0873 | 117.079 | -0.001  | 118.0863 | 384 | 47.1 | Betaine                         |
| 118.0873 | 117.079 | -0.001  | 118.0863 | 380 | 47.1 | Betaine                         |
| 118.0873 | 117.079 | -0.001  | 118.0863 | 379 | 47.1 | Betaine                         |
| 118.0873 | 117.079 | -0.001  | 118.0863 | 253 | 76.1 | Betaine                         |
| 118.0873 | 117.079 | -0.001  | 118.0863 | 246 | 76.1 | Betaine                         |
| 118.0873 | 117.079 | -0.001  | 118.0863 | 240 | 76.1 | Betaine                         |
| 118.0873 | 117.079 | -0.001  | 118.0863 | 306 | 34.8 | Betaine                         |
| 118.0873 | 117.079 | -0.001  | 118.0863 | 305 | 34.8 | Betaine                         |
| 118.0873 | 117.079 | -0.001  | 118.0863 | 303 | 34.8 | Betaine                         |
| 106.0872 | 105     | 0       | 106.09   | 180 | 73.5 | Diethanolamine                  |
| 106.0872 | 105.079 | -0.0009 | 106.0863 | 136 | 15.9 | Diethanolamine                  |
| 106.0872 | 105.079 | -0.0009 | 106.0863 | 135 | 15.9 | Diethanolamine                  |
| 106.0872 | 105     | 0       | 106.09   | 159 | 74.3 | Diethanolamine                  |
| 106.0872 | 105.079 | -0.0009 | 106.0863 | 127 | 19.9 | Diethanolamine                  |
| 106.0872 | 105.079 | -0.0009 | 106.0863 | 126 | 19.9 | Diethanolamine                  |
| 106.0872 | 105     | 0       | 106.09   | 196 | 80.2 | Diethanolamine                  |
| 106.0872 | 105.079 | -0.0009 | 106.0863 | 160 | 19.8 | Diethanolamine                  |
| 106.0872 | 105.079 | -0.0009 | 106.0863 | 159 | 19.8 | Diethanolamine                  |
| 84.0822  | 102.092 | -0.0014 | 84.0808  | 282 | 50   | Betaine aldehyde cation         |
| 84.0822  | 102.092 | -0.0014 | 84.0808  | 282 | 50   | Betaine aldehyde cation         |
| 84.0822  | 102.092 | -0.0014 | 84.0808  | 241 | 55.4 | Betaine aldehyde cation         |
| 84.0822  | 102.092 | -0.0014 | 84.0808  | 236 | 44.6 | Betaine aldehyde cation         |
| 84.0822  | 102.092 | -0.0014 | 84.0808  | 209 | 54.2 | Betaine aldehyde cation         |
| 84.0822  | 102.092 | -0.0014 | 84.0808  | 205 | 45.8 | Betaine aldehyde cation         |
| 84.0822  | 102.092 | -0.0014 | 84.0808  | 168 | 53.1 | Betaine aldehyde cation         |
| 84.0822  | 102.092 | -0.0014 | 84.0808  | 165 | 46.9 | Betaine aldehyde cation         |
| 186.0588 | 163.084 | 0.0149  | 186.0737 | 163 | 100  | N,N-Bis(2-hydroxyethyl)glycine  |
| 186.0588 | 163.084 | 0.0149  | 186.0737 | 153 | 100  | N,N-Bis(2-hydroxyethyl)glycine  |
| 186.0588 | 163.084 | 0.0149  | 186.0737 | 153 | 100  | N,N-Bis(2-hydroxyethyl)glycine  |
| 118.0873 | 117.079 | -0.001  | 118.0863 | 361 | 37.1 | Betaine                         |
| 118.0873 | 117.079 | -0.001  | 118.0863 | 361 | 37.1 | Betaine                         |
| 118.0873 | 117.079 | -0.001  | 118.0863 | 357 | 37.1 | Betaine                         |
| 118.0873 | 117.079 | -0.001  | 118.0863 | 314 | 80.4 | Betaine                         |

|          |         |         |          |     |      |                                 |
|----------|---------|---------|----------|-----|------|---------------------------------|
| 118.0873 | 117.079 | -0.001  | 118.0863 | 301 | 80.4 | Betaine                         |
| 118.0873 | 117.079 | -0.001  | 118.0863 | 282 | 80.4 | Betaine                         |
| 118.0873 | 117.079 | -0.001  | 118.0863 | 314 | 56.2 | Betaine                         |
| 118.0873 | 117.079 | -0.001  | 118.0863 | 314 | 56.2 | Betaine                         |
| 118.0873 | 117.079 | -0.001  | 118.0863 | 312 | 56.2 | Betaine                         |
| 97.0774  | 114.104 | 0.0238  | 97.1012  | 36  | 26.5 | Cyclohexanemethanol             |
| 97.0774  | 114.104 | 0.0238  | 97.1012  | 33  | 26.5 | Cyclohexanemethanol             |
| 97.0774  | 114.104 | 0.0238  | 97.1012  | 30  | 20.8 | Cyclohexanol, 4-methyl-, trans- |
| 106.0872 | 105     | 0       | 106.09   | 228 | 76.3 | Diethanolamine                  |
| 106.0872 | 105.079 | -0.0009 | 106.0863 | 194 | 19.6 | Diethanolamine                  |
| 106.0872 | 105.079 | -0.0009 | 106.0863 | 192 | 19.6 | Diethanolamine                  |
| 106.0872 | 105     | 0       | 106.09   | 158 | 76.1 | Diethanolamine                  |
| 106.0872 | 105.079 | -0.0009 | 106.0863 | 122 | 18.8 | Diethanolamine                  |
| 106.0872 | 105.079 | -0.0009 | 106.0863 | 122 | 18.8 | Diethanolamine                  |
| 106.0872 | 105.079 | -0.0009 | 106.0863 | 141 | 100  | Diethanolamine                  |
| 106.0872 | 105.079 | -0.0009 | 106.0863 | 141 | 100  | Diethanolamine                  |
| 106.0872 | 105.079 | -0.0009 | 106.0863 | 139 | 100  | Diethanolamine                  |
| 84.0822  | 102.092 | -0.0014 | 84.0808  | 281 | 54.2 | Betaine aldehyde cation         |
| 84.0822  | 102.092 | -0.0014 | 84.0808  | 277 | 45.8 | Betaine aldehyde cation         |
| 84.0822  | 102.092 | -0.0014 | 84.0808  | 270 | 53.1 | Betaine aldehyde cation         |
| 84.0822  | 102.092 | -0.0014 | 84.0808  | 267 | 46.9 | Betaine aldehyde cation         |
| 84.0822  | 102.092 | -0.0014 | 84.0808  | 171 | 52   | Betaine aldehyde cation         |
| 84.0822  | 102.092 | -0.0014 | 84.0808  | 169 | 48   | Betaine aldehyde cation         |
| 186.0588 | 163.084 | 0.0149  | 186.0737 | 154 | 84   | N,N-Bis(2-hydroxyethyl)glycine  |
| 186.0588 | 370.196 | 0.0467  | 186.1055 | 98  | 16   | Ser-His-Lys                     |
| 186.0588 | 163.084 | 0.0149  | 186.0737 | 153 | 100  | N,N-Bis(2-hydroxyethyl)glycine  |
| 106.0872 | 105.079 | -0.0009 | 106.0863 | 134 | 100  | Diethanolamine                  |
| 106.0872 | 105.079 | -0.0009 | 106.0863 | 129 | 100  | Diethanolamine                  |
| 106.0872 | 105.079 | -0.0009 | 106.0863 | 125 | 100  | Diethanolamine                  |
| 106.0872 | 105     | 0       | 106.09   | 170 | 79.9 | Diethanolamine                  |
| 106.0872 | 105.079 | -0.0009 | 106.0863 | 135 | 20.1 | Diethanolamine                  |
| 106.0872 | 105.079 | -0.0009 | 106.0863 | 134 | 20.1 | Diethanolamine                  |
| 106.0872 | 105.079 | -0.0009 | 106.0863 | 204 | 100  | Diethanolamine                  |
| 106.0872 | 105.079 | -0.0009 | 106.0863 | 204 | 100  | Diethanolamine                  |
| 106.0872 | 105.079 | -0.0009 | 106.0863 | 194 | 100  | Diethanolamine                  |
| 84.0822  | 102.092 | -0.0014 | 84.0808  | 267 | 51   | Betaine aldehyde cation         |
| 84.0822  | 102.092 | -0.0014 | 84.0808  | 266 | 49   | Betaine aldehyde cation         |
| 84.0822  | 102.092 | -0.0014 | 84.0808  | 230 | 50   | Betaine aldehyde cation         |
| 84.0822  | 102.092 | -0.0014 | 84.0808  | 230 | 50   | Betaine aldehyde cation         |
| 84.0822  | 102.092 | -0.0014 | 84.0808  | 200 | 53.1 | Betaine aldehyde cation         |
| 84.0822  | 102.092 | -0.0014 | 84.0808  | 197 | 46.9 | Betaine aldehyde cation         |
| 186.0588 | 370.196 | 0.0467  | 186.1055 | 50  | 100  | Ser-His-Lys                     |
| 118.0873 | 117.079 | -0.001  | 118.0863 | 318 | 43.4 | Betaine                         |
| 118.0873 | 117.079 | -0.001  | 118.0863 | 317 | 43.4 | Betaine                         |
| 118.0873 | 117.079 | -0.001  | 118.0863 | 312 | 43.4 | Betaine                         |
| 118.0873 | 117.079 | -0.001  | 118.0863 | 281 | 60.6 | Betaine                         |
| 118.0873 | 117.079 | -0.001  | 118.0863 | 280 | 60.6 | Betaine                         |

|          |         |         |          |     |      |                                 |
|----------|---------|---------|----------|-----|------|---------------------------------|
| 118.0873 | 117.079 | -0.001  | 118.0863 | 274 | 60.6 | Betaine                         |
| 118.0873 | 117.079 | -0.001  | 118.0863 | 322 | 57   | Betaine                         |
| 118.0873 | 117.079 | -0.001  | 118.0863 | 320 | 57   | Betaine                         |
| 118.0873 | 117.079 | -0.001  | 118.0863 | 314 | 57   | Betaine                         |
| 148.0974 | 147.053 | -0.037  | 148.0604 | 136 | 100  | O-Acetyl-L-serine               |
| 118.0873 | 117.079 | -0.001  | 118.0863 | 337 | 31.3 | Betaine                         |
| 118.0873 | 117.079 | -0.001  | 118.0863 | 336 | 31.3 | Betaine                         |
| 118.0873 | 117.079 | -0.001  | 118.0863 | 333 | 31.3 | Betaine                         |
| 118.0873 | 117.079 | -0.001  | 118.0863 | 235 | 67.6 | Betaine                         |
| 118.0873 | 117.079 | -0.001  | 118.0863 | 232 | 67.6 | Betaine                         |
| 118.0873 | 117.079 | -0.001  | 118.0863 | 230 | 67.6 | Betaine                         |
| 118.0873 | 117.079 | -0.001  | 118.0863 | 331 | 39   | Betaine                         |
| 118.0873 | 117.079 | -0.001  | 118.0863 | 329 | 39   | Betaine                         |
| 118.0873 | 117.079 | -0.001  | 118.0863 | 324 | 39   | Betaine                         |
| 106.0872 | 105     | 0       | 106.09   | 159 | 75.8 | Diethanolamine                  |
| 106.0872 | 105.079 | -0.0009 | 106.0863 | 124 | 19   | Diethanolamine                  |
| 106.0872 | 105.079 | -0.0009 | 106.0863 | 123 | 19   | Diethanolamine                  |
| 106.0872 | 105.079 | -0.0009 | 106.0863 | 107 | 100  | Diethanolamine                  |
| 106.0872 | 105.079 | -0.0009 | 106.0863 | 107 | 100  | Diethanolamine                  |
| 106.0872 | 105.079 | -0.0009 | 106.0863 | 106 | 100  | Diethanolamine                  |
| 84.0822  | 102.092 | -0.0014 | 84.0808  | 298 | 50   | Betaine aldehyde cation         |
| 84.0822  | 102.092 | -0.0014 | 84.0808  | 298 | 50   | Betaine aldehyde cation         |
| 84.0822  | 102.092 | -0.0014 | 84.0808  | 240 | 50   | Betaine aldehyde cation         |
| 84.0822  | 102.092 | -0.0014 | 84.0808  | 240 | 50   | Betaine aldehyde cation         |
| 84.0822  | 102.092 | -0.0014 | 84.0808  | 155 | 56   | Betaine aldehyde cation         |
| 84.0822  | 102.092 | -0.0014 | 84.0808  | 149 | 44   | Betaine aldehyde cation         |
| 186.0588 | 168.042 | 0.0173  | 186.0761 | 26  | 100  | 3-Hydroxy-4-methoxybenzoic acid |
| 186.0588 | 370.196 | 0.0467  | 186.1055 | 55  | 100  | Ser-His-Lys                     |
| 186.0588 | 163.084 | 0.0149  | 186.0737 | 157 | 100  | N,N-Bis(2-hydroxyethyl)glycine  |
| 118.0873 | 117.079 | -0.001  | 118.0863 | 415 | 58.5 | Betaine                         |
| 118.0873 | 117.079 | -0.001  | 118.0863 | 413 | 58.5 | Betaine                         |
| 118.0873 | 117.079 | -0.001  | 118.0863 | 408 | 58.5 | Betaine                         |
| 118.0873 | 117.079 | -0.001  | 118.0863 | 319 | 33.5 | Betaine                         |
| 118.0873 | 117.079 | -0.001  | 118.0863 | 318 | 33.5 | Betaine                         |
| 118.0873 | 117.079 | -0.001  | 118.0863 | 315 | 33.5 | Betaine                         |
| 118.0873 | 117.079 | -0.001  | 118.0863 | 380 | 34.7 | Betaine                         |
| 118.0873 | 117.079 | -0.001  | 118.0863 | 379 | 34.7 | Betaine                         |
| 118.0873 | 117.079 | -0.001  | 118.0863 | 375 | 34.7 | Betaine                         |
| 97.0774  | 114.104 | 0.0238  | 97.1012  | 40  | 20.8 | Cyclohexanemethanol             |
| 97.0774  | 114.104 | 0.0238  | 97.1012  | 39  | 19.9 | Cyclohexanol, 1-methyl-         |
| 97.0774  | 114.104 | 0.0238  | 97.1012  | 39  | 19.9 | Cyclohexanol, 4-methyl-, trans- |
| 106.0872 | 105     | 0       | 106.09   | 171 | 77.9 | Diethanolamine                  |
| 106.0872 | 105.079 | -0.0009 | 106.0863 | 142 | 22.1 | Diethanolamine                  |
| 106.0872 | 105.079 | -0.0009 | 106.0863 | 141 | 22.1 | Diethanolamine                  |
| 106.0872 | 105     | 0       | 106.09   | 212 | 63.5 | Diethanolamine                  |
| 106.0872 | 105.079 | -0.0009 | 106.0863 | 191 | 27   | Diethanolamine                  |

|          |         |         |          |     |      |                                           |
|----------|---------|---------|----------|-----|------|-------------------------------------------|
| 106.0872 | 105.079 | -0.0009 | 106.0863 | 187 | 27   | Diethanolamine                            |
| 84.0822  | 102.092 | -0.0014 | 84.0808  | 292 | 55.4 | Betaine aldehyde cation                   |
| 84.0822  | 102.092 | -0.0014 | 84.0808  | 287 | 44.6 | Betaine aldehyde cation                   |
| 84.0822  | 102.092 | -0.0014 | 84.0808  | 225 | 52   | Betaine aldehyde cation                   |
| 84.0822  | 102.092 | -0.0014 | 84.0808  | 223 | 48   | Betaine aldehyde cation                   |
| 84.0822  | 102.092 | -0.0014 | 84.0808  | 149 | 53.1 | Betaine aldehyde cation                   |
| 84.0822  | 102.092 | -0.0014 | 84.0808  | 146 | 46.9 | Betaine aldehyde cation                   |
| 186.0588 | 370.196 | 0.0467  | 186.1055 | 37  | 64.7 | Ser-His-Lys                               |
| 186.0588 | 370.196 | 0.0467  | 186.1055 | 20  | 35.3 | Ser-His-Lys                               |
| 186.0588 | 163.084 | 0.0149  | 186.0737 | 120 | 100  | N,N-Bis(2-hydroxyethyl)glycine            |
| 186.0588 | 370.196 | 0.0467  | 186.1055 | 70  | 60   | Ser-His-Lys                               |
| 186.0588 | 370.196 | 0.0467  | 186.1055 | 58  | 40   | Ser-His-Lys                               |
| 186.0588 | 370.196 | 0.0467  | 186.1055 | 72  | 100  | Ser-His-Lys                               |
| 106.0872 | 105     | 0       | 106.09   | 153 | 78.9 | Diethanolamine                            |
| 106.0872 | 105.079 | -0.0009 | 106.0863 | 121 | 21.1 | Diethanolamine                            |
| 106.0872 | 105.079 | -0.0009 | 106.0863 | 121 | 21.1 | Diethanolamine                            |
| 106.0872 | 105.079 | -0.0009 | 106.0863 | 131 | 100  | Diethanolamine                            |
| 106.0872 | 105.079 | -0.0009 | 106.0863 | 128 | 100  | Diethanolamine                            |
| 106.0872 | 105.079 | -0.0009 | 106.0863 | 125 | 100  | Diethanolamine                            |
| 84.0822  | 102.092 | -0.0014 | 84.0808  | 279 | 52   | Betaine aldehyde cation                   |
| 84.0822  | 102.092 | -0.0014 | 84.0808  | 277 | 48   | Betaine aldehyde cation                   |
| 84.0822  | 102.092 | -0.0014 | 84.0808  | 233 | 54.2 | Betaine aldehyde cation                   |
| 84.0822  | 102.092 | -0.0014 | 84.0808  | 229 | 45.8 | Betaine aldehyde cation                   |
| 84.0822  | 102.092 | -0.0014 | 84.0808  | 173 | 52   | Betaine aldehyde cation                   |
| 84.0822  | 102.092 | -0.0014 | 84.0808  | 171 | 48   | Betaine aldehyde cation                   |
| 186.0588 | 163.084 | 0.0149  | 186.0737 | 126 | 100  | N,N-Bis(2-hydroxyethyl)glycine            |
| 148.0974 | 147.053 | -0.037  | 148.0604 | 123 | 100  | O-Acetyl-L-serine                         |
| 118.0873 | 117.079 | -0.001  | 118.0863 | 340 | 53.1 | Betaine                                   |
| 118.0873 | 117.079 | -0.001  | 118.0863 | 340 | 53.1 | Betaine                                   |
| 118.0873 | 117.079 | -0.001  | 118.0863 | 337 | 53.1 | Betaine                                   |
| 118.0873 | 117.079 | -0.001  | 118.0863 | 291 | 97.1 | Betaine                                   |
| 118.0873 | 117.079 | -0.001  | 118.0863 | 277 | 97.1 | Betaine                                   |
| 118.0873 | 117.079 | -0.001  | 118.0863 | 259 | 97.1 | Betaine                                   |
| 118.0873 | 117.079 | -0.001  | 118.0863 | 377 | 51.1 | Betaine                                   |
| 118.0873 | 117.079 | -0.001  | 118.0863 | 377 | 51.1 | Betaine                                   |
| 118.0873 | 117.079 | -0.001  | 118.0863 | 374 | 51.1 | Betaine                                   |
| 393.2988 | 392.293 | 0.0011  | 393.2999 | 37  | 100  | Chenodeoxycholic acid                     |
| 393.2988 | 392.293 | 0.0011  | 393.2999 | 36  | 100  | Chenodeoxycholic acid                     |
| 393.2988 | 392.293 | 0.0011  | 393.2999 | 35  | 100  | Chenodeoxycholic acid                     |
| 371.2927 | 370.308 | 0.0229  | 371.3156 | 186 | 100  | Hexanedioic acid, bis(2-ethylhexyl) ester |
| 371.2927 | 370.308 | 0.0229  | 371.3156 | 160 | 100  | Hexanedioic acid, bis(2-ethylhexyl) ester |
| 371.2927 | 370.308 | 0.0229  | 371.3156 | 152 | 100  | Hexanedioic acid, bis(2-ethylhexyl) ester |
| 371.2927 | 370.308 | 0.0229  | 371.3156 | 153 | 100  | Hexanedioic acid, bis(2-ethylhexyl) ester |



|          |         |         |          |     |      |                                           |
|----------|---------|---------|----------|-----|------|-------------------------------------------|
| 371.2927 | 370.308 | 0.0229  | 371.3156 | 152 | 100  | Hexanedioic acid, bis(2-ethylhexyl) ester |
| 371.2927 | 370.308 | 0.0229  | 371.3156 | 148 | 100  | Hexanedioic acid, bis(2-ethylhexyl) ester |
| 371.2927 | 370.308 | 0.0229  | 371.3156 | 21  | 100  | Hexanedioic acid, bis(2-ethylhexyl) ester |
| 371.2927 | 370.308 | 0.0229  | 371.3156 | 1   | 100  | Hexanedioic acid, bis(2-ethylhexyl) ester |
| 371.2927 | 370.308 | 0.0229  | 371.3156 | 125 | 74.8 | Hexanedioic acid, bis(2-ethylhexyl) ester |
| 371.2927 | 370.308 | 0.0229  | 371.3156 | 110 | 74.8 | Hexanedioic acid, bis(2-ethylhexyl) ester |
| 371.2927 | 370.308 | 0.0229  | 371.3156 | 94  | 74.8 | Hexanedioic acid, bis(2-ethylhexyl) ester |
| 118.0873 | 117.079 | -0.001  | 118.0863 | 391 | 34.4 | Betaine                                   |
| 118.0873 | 117.079 | -0.001  | 118.0863 | 389 | 34.4 | Betaine                                   |
| 118.0873 | 117.079 | -0.001  | 118.0863 | 387 | 34.4 | Betaine                                   |
| 118.0873 | 117.079 | -0.001  | 118.0863 | 291 | 66.1 | Betaine                                   |
| 118.0873 | 117.079 | -0.001  | 118.0863 | 289 | 66.1 | Betaine                                   |
| 118.0873 | 117.079 | -0.001  | 118.0863 | 283 | 66.1 | Betaine                                   |
| 118.0873 | 117.079 | -0.001  | 118.0863 | 290 | 64.3 | Betaine                                   |
| 118.0873 | 117.079 | -0.001  | 118.0863 | 290 | 64.3 | Betaine                                   |
| 118.0873 | 117.079 | -0.001  | 118.0863 | 286 | 64.3 | Betaine                                   |
| 97.0774  | 114.104 | 0.0238  | 97.1012  | 35  | 23   | Cyclohexanemethanol                       |
| 97.0774  | 114.104 | 0.0238  | 97.1012  | 35  | 23   | Cyclohexanol, 4-methyl-, trans-           |
| 97.0774  | 114.104 | 0.0238  | 97.1012  | 34  | 23   | Cyclohexanemethanol                       |
| 106.0872 | 105     | 0       | 106.09   | 159 | 79.3 | Diethanolamine                            |
| 106.0872 | 105.079 | -0.0009 | 106.0863 | 126 | 20.7 | Diethanolamine                            |
| 106.0872 | 105.079 | -0.0009 | 106.0863 | 125 | 20.7 | Diethanolamine                            |
| 106.0872 | 105     | 0       | 106.09   | 218 | 77.9 | Diethanolamine                            |
| 106.0872 | 105.079 | -0.0009 | 106.0863 | 189 | 22.1 | Diethanolamine                            |
| 106.0872 | 105.079 | -0.0009 | 106.0863 | 189 | 22.1 | Diethanolamine                            |
| 84.0822  | 102.092 | -0.0014 | 84.0808  | 290 | 51   | Betaine aldehyde cation                   |
| 84.0822  | 102.092 | -0.0014 | 84.0808  | 289 | 49   | Betaine aldehyde cation                   |
| 84.0822  | 102.092 | -0.0014 | 84.0808  | 233 | 51   | Betaine aldehyde cation                   |
| 84.0822  | 102.092 | -0.0014 | 84.0808  | 232 | 49   | Betaine aldehyde cation                   |
| 84.0822  | 102.092 | -0.0014 | 84.0808  | 150 | 55.4 | Betaine aldehyde cation                   |
| 84.0822  | 102.092 | -0.0014 | 84.0808  | 145 | 44.6 | Betaine aldehyde cation                   |
| 84.0822  | 102.092 | -0.0014 | 84.0808  | 182 | 54.2 | Betaine aldehyde cation                   |
| 84.0822  | 102.092 | -0.0014 | 84.0808  | 178 | 45.8 | Betaine aldehyde cation                   |
| 186.0588 | 163.084 | 0.0149  | 186.0737 | 121 | 83.5 | N,N-Bis(2-hydroxyethyl)glycine            |
| 186.0588 | 163.084 | 0.0149  | 186.0737 | 93  | 83.5 | N,N-Bis(2-hydroxyethyl)glycine            |
| 186.0588 | 203.091 | 0.0285  | 186.0873 | 68  | 16.5 | Ala-Asn                                   |
| 186.0588 | 163.084 | 0.0149  | 186.0737 | 145 | 88.3 | N,N-Bis(2-hydroxyethyl)glycine            |
| 186.0588 | 370.196 | 0.0467  | 186.1055 | 71  | 11.7 | Ser-His-Lys                               |
| 186.0588 | 163.084 | 0.0149  | 186.0737 | 152 | 100  | N,N-Bis(2-hydroxyethyl)glycine            |
| 148.0974 | 147.053 | -0.037  | 148.0604 | 98  | 45.8 | O-Acetyl-L-serine                         |

|          |         |         |          |     |      |                                 |
|----------|---------|---------|----------|-----|------|---------------------------------|
| 148.0974 | 147.053 | -0.037  | 148.0604 | 94  | 45.8 | O-Acetyl-L-serine               |
| 148.0974 | 147     | -0.04   | 148.06   | 90  | 34.1 | O-acetyl-L-serine hydrochloride |
| 148.0974 | 147.053 | -0.037  | 148.0604 | 272 | 75.6 | O-Acetyl-L-serine               |
| 148.0974 | 147.053 | -0.037  | 148.0604 | 255 | 75.6 | O-Acetyl-L-serine               |
| 148.0974 | 147     | -0.04   | 148.06   | 241 | 20.6 | O-acetyl-L-serine hydrochloride |
| 148.0974 | 147.053 | -0.037  | 148.0604 | 212 | 79.6 | O-Acetyl-L-serine               |
| 148.0974 | 147.053 | -0.037  | 148.0604 | 201 | 79.6 | O-Acetyl-L-serine               |
| 148.0974 | 147.053 | -0.037  | 148.0604 | 183 | 79.6 | O-Acetyl-L-serine               |
| 97.0774  | 114.104 | 0.0238  | 97.1012  | 35  | 19.5 | Cyclohexanol, 1-methyl-         |
| 97.0774  | 114.104 | 0.0238  | 97.1012  | 35  | 19.5 | Cyclohexanemethanol             |
| 97.0774  | 114.104 | 0.0238  | 97.1012  | 35  | 19.5 | Cyclohexanol, 4-methyl-, trans- |
| 97.0774  | 114.104 | 0.0238  | 97.1012  | 22  | 100  | Cyclohexanol, 4-methyl-, trans- |
| 118.0873 | 117.079 | -0.001  | 118.0863 | 310 | 49.9 | Betaine                         |
| 118.0873 | 117.079 | -0.001  | 118.0863 | 307 | 49.9 | Betaine                         |
| 118.0873 | 117.079 | -0.001  | 118.0863 | 304 | 49.9 | Betaine                         |
| 118.0873 | 117.079 | -0.001  | 118.0863 | 395 | 38   | Betaine                         |
| 118.0873 | 117.079 | -0.001  | 118.0863 | 393 | 38   | Betaine                         |
| 118.0873 | 117.079 | -0.001  | 118.0863 | 388 | 38   | Betaine                         |
| 118.0873 | 117.079 | -0.001  | 118.0863 | 305 | 68.3 | Betaine                         |
| 118.0873 | 117.079 | -0.001  | 118.0863 | 303 | 68.3 | Betaine                         |
| 118.0873 | 117.079 | -0.001  | 118.0863 | 298 | 68.3 | Betaine                         |
| 118.0873 | 117.079 | -0.001  | 118.0863 | 286 | 66   | Betaine                         |
| 118.0873 | 117.079 | -0.001  | 118.0863 | 283 | 66   | Betaine                         |
| 118.0873 | 117.079 | -0.001  | 118.0863 | 282 | 66   | Betaine                         |
| 106.0872 | 105     | 0       | 106.09   | 159 | 74.1 | Diethanolamine                  |
| 106.0872 | 105.079 | -0.0009 | 106.0863 | 126 | 19.4 | Diethanolamine                  |
| 106.0872 | 105.079 | -0.0009 | 106.0863 | 125 | 19.4 | Diethanolamine                  |
| 106.0872 | 105     | 0       | 106.09   | 152 | 74.8 | Diethanolamine                  |
| 106.0872 | 105.079 | -0.0009 | 106.0863 | 118 | 19.2 | Diethanolamine                  |
| 106.0872 | 105.079 | -0.0009 | 106.0863 | 117 | 19.2 | Diethanolamine                  |
| 106.0872 | 105     | 0       | 106.09   | 176 | 77.5 | Diethanolamine                  |
| 106.0872 | 105.079 | -0.0009 | 106.0863 | 145 | 21.1 | Diethanolamine                  |
| 106.0872 | 105.079 | -0.0009 | 106.0863 | 144 | 21.1 | Diethanolamine                  |
| 84.0822  | 102.092 | -0.0014 | 84.0808  | 292 | 54.2 | Betaine aldehyde cation         |
| 84.0822  | 102.092 | -0.0014 | 84.0808  | 288 | 45.8 | Betaine aldehyde cation         |
| 84.0822  | 102.092 | -0.0014 | 84.0808  | 259 | 50   | Betaine aldehyde cation         |
| 84.0822  | 102.092 | -0.0014 | 84.0808  | 259 | 50   | Betaine aldehyde cation         |
| 84.0822  | 102.092 | -0.0014 | 84.0808  | 197 | 54.2 | Betaine aldehyde cation         |
| 84.0822  | 102.092 | -0.0014 | 84.0808  | 193 | 45.8 | Betaine aldehyde cation         |
| 84.0822  | 102.092 | -0.0014 | 84.0808  | 200 | 55.4 | Betaine aldehyde cation         |
| 84.0822  | 102.092 | -0.0014 | 84.0808  | 195 | 44.6 | Betaine aldehyde cation         |
| 186.0588 | 370.196 | 0.0467  | 186.1055 | 60  | 100  | Ser-His-Lys                     |
| 186.0588 | 163.084 | 0.0149  | 186.0737 | 141 | 100  | N,N-Bis(2-hydroxyethyl)glycine  |
| 118.0873 | 117.079 | -0.001  | 118.0863 | 307 | 61.8 | Betaine                         |
| 118.0873 | 117.079 | -0.001  | 118.0863 | 301 | 61.8 | Betaine                         |
| 118.0873 | 117.079 | -0.001  | 118.0863 | 291 | 61.8 | Betaine                         |
| 118.0873 | 117.079 | -0.001  | 118.0863 | 378 | 39.3 | Betaine                         |

|          |         |         |          |     |      |                                 |
|----------|---------|---------|----------|-----|------|---------------------------------|
| 118.0873 | 117.079 | -0.001  | 118.0863 | 373 | 39.3 | Betaine                         |
| 118.0873 | 117.079 | -0.001  | 118.0863 | 373 | 39.3 | Betaine                         |
| 118.0873 | 117.079 | -0.001  | 118.0863 | 299 | 66.7 | Betaine                         |
| 118.0873 | 117.079 | -0.001  | 118.0863 | 299 | 66.7 | Betaine                         |
| 118.0873 | 117.079 | -0.001  | 118.0863 | 295 | 66.7 | Betaine                         |
| 118.0873 | 117.079 | -0.001  | 118.0863 | 323 | 61.8 | Betaine                         |
| 118.0873 | 117.079 | -0.001  | 118.0863 | 322 | 61.8 | Betaine                         |
| 118.0873 | 117.079 | -0.001  | 118.0863 | 320 | 61.8 | Betaine                         |
| 106.0872 | 105     | 0       | 106.09   | 156 | 80.7 | Diethanolamine                  |
| 106.0872 | 105.079 | -0.0009 | 106.0863 | 118 | 19.3 | Diethanolamine                  |
| 106.0872 | 105.079 | -0.0009 | 106.0863 | 117 | 19.3 | Diethanolamine                  |
| 84.0822  | 102.092 | -0.0014 | 84.0808  | 304 | 54.2 | Betaine aldehyde cation         |
| 84.0822  | 102.092 | -0.0014 | 84.0808  | 300 | 45.8 | Betaine aldehyde cation         |
| 84.0822  | 102.092 | -0.0014 | 84.0808  | 287 | 55.4 | Betaine aldehyde cation         |
| 84.0822  | 102.092 | -0.0014 | 84.0808  | 282 | 44.6 | Betaine aldehyde cation         |
| 84.0822  | 102.092 | -0.0014 | 84.0808  | 208 | 53.1 | Betaine aldehyde cation         |
| 84.0822  | 102.092 | -0.0014 | 84.0808  | 205 | 46.9 | Betaine aldehyde cation         |
| 186.0588 | 163.084 | 0.0149  | 186.0737 | 183 | 94   | N,N-Bis(2-hydroxyethyl)glycine  |
| 186.0588 | 163.084 | 0.0149  | 186.0737 | 125 | 94   | N,N-Bis(2-hydroxyethyl)glycine  |
| 186.0588 | 203.091 | 0.0285  | 186.0873 | 72  | 5.9  | Ala-Asn                         |
| 186.0588 | 370.196 | 0.0467  | 186.1055 | 104 | 100  | Ser-His-Lys                     |
| 118.0873 | 117.079 | -0.001  | 118.0863 | 339 | 62.8 | Betaine                         |
| 118.0873 | 117.079 | -0.001  | 118.0863 | 339 | 62.8 | Betaine                         |
| 118.0873 | 117.079 | -0.001  | 118.0863 | 331 | 62.8 | Betaine                         |
| 118.0873 | 117.079 | -0.001  | 118.0863 | 283 | 35.8 | Betaine                         |
| 118.0873 | 117.079 | -0.001  | 118.0863 | 282 | 35.8 | Betaine                         |
| 118.0873 | 117.079 | -0.001  | 118.0863 | 280 | 35.8 | Betaine                         |
| 118.0873 | 117.079 | -0.001  | 118.0863 | 310 | 33.9 | Betaine                         |
| 118.0873 | 117.079 | -0.001  | 118.0863 | 310 | 33.9 | Betaine                         |
| 118.0873 | 117.079 | -0.001  | 118.0863 | 308 | 33.9 | Betaine                         |
| 97.0774  | 114.104 | 0.0238  | 97.1012  | 48  | 25   | Cyclohexanemethanol             |
| 97.0774  | 114.104 | 0.0238  | 97.1012  | 43  | 20.2 | Cyclohexanol, 1-methyl-         |
| 97.0774  | 114.104 | 0.0238  | 97.1012  | 36  | 15.4 | Cyclohexanol, 4-methyl-, trans- |
| 106.0872 | 105     | 0       | 106.09   | 160 | 73.8 | Diethanolamine                  |
| 106.0872 | 105.079 | -0.0009 | 106.0863 | 125 | 18.5 | Diethanolamine                  |
| 106.0872 | 105.079 | -0.0009 | 106.0863 | 125 | 18.5 | Diethanolamine                  |
| 106.0872 | 105     | 0       | 106.09   | 157 | 74.7 | Diethanolamine                  |
| 106.0872 | 105.079 | -0.0009 | 106.0863 | 122 | 18.8 | Diethanolamine                  |
| 106.0872 | 105.079 | -0.0009 | 106.0863 | 122 | 18.8 | Diethanolamine                  |
| 84.0822  | 102.092 | -0.0014 | 84.0808  | 304 | 52   | Betaine aldehyde cation         |
| 84.0822  | 102.092 | -0.0014 | 84.0808  | 302 | 48   | Betaine aldehyde cation         |
| 84.0822  | 102.092 | -0.0014 | 84.0808  | 237 | 50   | Betaine aldehyde cation         |
| 84.0822  | 102.092 | -0.0014 | 84.0808  | 237 | 50   | Betaine aldehyde cation         |
| 84.0822  | 102.092 | -0.0014 | 84.0808  | 196 | 54.2 | Betaine aldehyde cation         |
| 84.0822  | 102.092 | -0.0014 | 84.0808  | 192 | 45.8 | Betaine aldehyde cation         |
| 148.0974 | 147.053 | -0.037  | 148.0604 | 134 | 100  | O-Acetyl-L-serine               |
| 118.0873 | 117.079 | -0.001  | 118.0863 | 320 | 60.8 | Betaine                         |

|          |         |         |          |     |      |                                 |
|----------|---------|---------|----------|-----|------|---------------------------------|
| 118.0873 | 117.079 | -0.001  | 118.0863 | 317 | 60.8 | Betaine                         |
| 118.0873 | 117.079 | -0.001  | 118.0863 | 316 | 60.8 | Betaine                         |
| 118.0873 | 117.079 | -0.001  | 118.0863 | 267 | 60   | Betaine                         |
| 118.0873 | 117.079 | -0.001  | 118.0863 | 267 | 60   | Betaine                         |
| 118.0873 | 117.079 | -0.001  | 118.0863 | 264 | 60   | Betaine                         |
| 118.0873 | 117.079 | -0.001  | 118.0863 | 313 | 35   | Betaine                         |
| 118.0873 | 117.079 | -0.001  | 118.0863 | 312 | 35   | Betaine                         |
| 118.0873 | 117.079 | -0.001  | 118.0863 | 312 | 35   | Betaine                         |
| 186.0588 | 370.196 | 0.0467  | 186.1055 | 48  | 100  | Ser-His-Lys                     |
| 186.0588 | 370.196 | 0.0467  | 186.1055 | 46  | 100  | Ser-His-Lys                     |
| 186.0588 | 163.084 | 0.0149  | 186.0737 | 166 | 94   | N,N-Bis(2-hydroxyethyl)glycine  |
| 186.0588 | 370.196 | 0.0467  | 186.1055 | 56  | 6    | Ser-His-Lys                     |
| 148.0974 | 147     | -0.04   | 148.06   | 63  | 60   | O-acetyl-L-serine hydrochloride |
| 148.0974 | 147     | -0.04   | 148.06   | 51  | 40   | O-acetyl-L-serine hydrochloride |
| 148.0974 | 147.053 | -0.037  | 148.0604 | 168 | 74.9 | O-Acetyl-L-serine               |
| 148.0974 | 147.053 | -0.037  | 148.0604 | 157 | 74.9 | O-Acetyl-L-serine               |
| 148.0974 | 147     | -0.04   | 148.06   | 144 | 25.1 | O-acetyl-L-serine hydrochloride |
| 97.0774  | 114.104 | 0.0238  | 97.1012  | 37  | 26.2 | Cyclohexanol, 1-methyl-         |
| 97.0774  | 114.104 | 0.0238  | 97.1012  | 27  | 18.5 | Cycloheptanol                   |
| 97.0774  | 114.104 | 0.0238  | 97.1012  | 22  | 14.9 | Cyclohexanol, 4-methyl-, trans- |
| 97.0774  | 114.104 | 0.0238  | 97.1012  | 24  | 22.9 | Cyclohexanol, 1-methyl-         |
| 97.0774  | 114.104 | 0.0238  | 97.1012  | 16  | 17.1 | Cycloheptanol                   |
| 97.0774  | 114.104 | 0.0238  | 97.1012  | 14  | 15.8 | Cyclohexanemethanol             |
| 118.0873 | 117.079 | -0.001  | 118.0863 | 278 | 83   | Betaine                         |
| 118.0873 | 117.079 | -0.001  | 118.0863 | 278 | 83   | Betaine                         |
| 118.0873 | 117.079 | -0.001  | 118.0863 | 268 | 83   | Betaine                         |
| 118.0873 | 117.079 | -0.001  | 118.0863 | 433 | 34.6 | Betaine                         |
| 118.0873 | 117.079 | -0.001  | 118.0863 | 432 | 34.6 | Betaine                         |
| 118.0873 | 117.079 | -0.001  | 118.0863 | 428 | 34.6 | Betaine                         |
| 118.0873 | 117.079 | -0.001  | 118.0863 | 294 | 75.4 | Betaine                         |
| 118.0873 | 117.079 | -0.001  | 118.0863 | 287 | 75.4 | Betaine                         |
| 118.0873 | 117.079 | -0.001  | 118.0863 | 286 | 75.4 | Betaine                         |
| 118.0873 | 117.079 | -0.001  | 118.0863 | 273 | 56.9 | Betaine                         |
| 118.0873 | 117.079 | -0.001  | 118.0863 | 273 | 56.9 | Betaine                         |
| 118.0873 | 117.079 | -0.001  | 118.0863 | 270 | 56.9 | Betaine                         |
| 106.0872 | 105     | 0       | 106.09   | 170 | 79.9 | Diethanolamine                  |
| 106.0872 | 105.079 | -0.0009 | 106.0863 | 135 | 20.1 | Diethanolamine                  |
| 106.0872 | 105.079 | -0.0009 | 106.0863 | 135 | 20.1 | Diethanolamine                  |
| 106.0872 | 105     | 0       | 106.09   | 158 | 73.9 | Diethanolamine                  |
| 106.0872 | 105.079 | -0.0009 | 106.0863 | 126 | 19.7 | Diethanolamine                  |
| 106.0872 | 105.079 | -0.0009 | 106.0863 | 125 | 19.7 | Diethanolamine                  |
| 106.0872 | 105     | 0       | 106.09   | 136 | 78.9 | Diethanolamine                  |
| 106.0872 | 105.079 | -0.0009 | 106.0863 | 104 | 21.1 | Diethanolamine                  |
| 106.0872 | 105.079 | -0.0009 | 106.0863 | 103 | 21.1 | Diethanolamine                  |
| 84.0822  | 102.092 | -0.0014 | 84.0808  | 315 | 52   | Betaine aldehyde cation         |
| 84.0822  | 102.092 | -0.0014 | 84.0808  | 313 | 48   | Betaine aldehyde cation         |
| 84.0822  | 102.092 | -0.0014 | 84.0808  | 195 | 51   | Betaine aldehyde cation         |

|          |         |         |          |     |      |                                |
|----------|---------|---------|----------|-----|------|--------------------------------|
| 84.0822  | 102.092 | -0.0014 | 84.0808  | 194 | 49   | Betaine aldehyde cation        |
| 84.0822  | 102.092 | -0.0014 | 84.0808  | 119 | 54.2 | Betaine aldehyde cation        |
| 84.0822  | 102.092 | -0.0014 | 84.0808  | 115 | 45.8 | Betaine aldehyde cation        |
| 84.0822  | 102.092 | -0.0014 | 84.0808  | 213 | 54.2 | Betaine aldehyde cation        |
| 84.0822  | 102.092 | -0.0014 | 84.0808  | 209 | 45.8 | Betaine aldehyde cation        |
| 186.0588 | 370.196 | 0.0467  | 186.1055 | 58  | 32.2 | Ser-His-Lys                    |
| 186.0588 | 203.091 | 0.0285  | 186.0873 | 53  | 26   | Ala-Asn                        |
| 186.0588 | 370.196 | 0.0467  | 186.1055 | 42  | 17.8 | Ser-His-Lys                    |
| 186.0588 | 163.084 | 0.0149  | 186.0737 | 140 | 85.2 | N,N-Bis(2-hydroxyethyl)glycine |
| 186.0588 | 370.196 | 0.0467  | 186.1055 | 79  | 14.8 | Ser-His-Lys                    |
| 118.0873 | 117.079 | -0.001  | 118.0863 | 344 | 100  | Betaine                        |
| 118.0873 | 117.079 | -0.001  | 118.0863 | 343 | 100  | Betaine                        |
| 118.0873 | 117.079 | -0.001  | 118.0863 | 341 | 100  | Betaine                        |
| 118.0873 | 117.079 | -0.001  | 118.0863 | 437 | 56   | Betaine                        |
| 118.0873 | 117.079 | -0.001  | 118.0863 | 432 | 56   | Betaine                        |
| 118.0873 | 117.079 | -0.001  | 118.0863 | 429 | 56   | Betaine                        |
| 118.0873 | 117.079 | -0.001  | 118.0863 | 287 | 62.8 | Betaine                        |
| 118.0873 | 117.079 | -0.001  | 118.0863 | 287 | 62.8 | Betaine                        |
| 118.0873 | 117.079 | -0.001  | 118.0863 | 284 | 62.8 | Betaine                        |
| 118.0873 | 117.079 | -0.001  | 118.0863 | 327 | 46.7 | Betaine                        |
| 118.0873 | 117.079 | -0.001  | 118.0863 | 326 | 46.7 | Betaine                        |
| 118.0873 | 117.079 | -0.001  | 118.0863 | 326 | 46.7 | Betaine                        |
| 106.0872 | 105     | 0       | 106.09   | 210 | 74.1 | Diethanolamine                 |
| 106.0872 | 105.079 | -0.0009 | 106.0863 | 180 | 20.6 | Diethanolamine                 |
| 106.0872 | 105.079 | -0.0009 | 106.0863 | 180 | 20.6 | Diethanolamine                 |
| 106.0872 | 105     | 0       | 106.09   | 226 | 76.6 | Diethanolamine                 |
| 106.0872 | 105.079 | -0.0009 | 106.0863 | 201 | 23.4 | Diethanolamine                 |
| 106.0872 | 105.079 | -0.0009 | 106.0863 | 201 | 23.4 | Diethanolamine                 |
| 84.0822  | 102.092 | -0.0014 | 84.0808  | 295 | 50   | Betaine aldehyde cation        |
| 84.0822  | 102.092 | -0.0014 | 84.0808  | 295 | 50   | Betaine aldehyde cation        |
| 84.0822  | 102.092 | -0.0014 | 84.0808  | 242 | 50   | Betaine aldehyde cation        |
| 84.0822  | 102.092 | -0.0014 | 84.0808  | 242 | 50   | Betaine aldehyde cation        |
| 84.0822  | 102.092 | -0.0014 | 84.0808  | 182 | 50   | Betaine aldehyde cation        |
| 84.0822  | 102.092 | -0.0014 | 84.0808  | 182 | 50   | Betaine aldehyde cation        |
| 84.0822  | 102.092 | -0.0014 | 84.0808  | 153 | 53.1 | Betaine aldehyde cation        |
| 84.0822  | 102.092 | -0.0014 | 84.0808  | 150 | 46.9 | Betaine aldehyde cation        |
| 186.0588 | 163.084 | 0.0149  | 186.0737 | 177 | 100  | N,N-Bis(2-hydroxyethyl)glycine |
| 186.0588 | 163.084 | 0.0149  | 186.0737 | 116 | 100  | N,N-Bis(2-hydroxyethyl)glycine |
| 186.0588 | 163.084 | 0.0149  | 186.0737 | 141 | 88.3 | N,N-Bis(2-hydroxyethyl)glycine |
| 186.0588 | 370.196 | 0.0467  | 186.1055 | 67  | 11.7 | Ser-His-Lys                    |
| 186.0588 | 163.084 | 0.0149  | 186.0737 | 138 | 100  | N,N-Bis(2-hydroxyethyl)glycine |
| 118.0873 | 117.079 | -0.001  | 118.0863 | 367 | 46   | Betaine                        |
| 118.0873 | 117.079 | -0.001  | 118.0863 | 366 | 46   | Betaine                        |
| 118.0873 | 117.079 | -0.001  | 118.0863 | 362 | 46   | Betaine                        |
| 118.0873 | 117.079 | -0.001  | 118.0863 | 388 | 35.6 | Betaine                        |
| 118.0873 | 117.079 | -0.001  | 118.0863 | 387 | 35.6 | Betaine                        |
| 118.0873 | 117.079 | -0.001  | 118.0863 | 384 | 35.6 | Betaine                        |

|          |         |         |          |     |      |                                 |
|----------|---------|---------|----------|-----|------|---------------------------------|
| 118.0873 | 117.079 | -0.001  | 118.0863 | 290 | 64.8 | Betaine                         |
| 118.0873 | 117.079 | -0.001  | 118.0863 | 289 | 64.8 | Betaine                         |
| 118.0873 | 117.079 | -0.001  | 118.0863 | 284 | 64.8 | Betaine                         |
| 118.0873 | 117.079 | -0.001  | 118.0863 | 364 | 42.1 | Betaine                         |
| 118.0873 | 117.079 | -0.001  | 118.0863 | 364 | 42.1 | Betaine                         |
| 118.0873 | 117.079 | -0.001  | 118.0863 | 358 | 42.1 | Betaine                         |
| 106.0872 | 105     | 0       | 106.09   | 159 | 76.8 | Diethanolamine                  |
| 106.0872 | 105.079 | -0.0009 | 106.0863 | 119 | 17.8 | Diethanolamine                  |
| 106.0872 | 105.079 | -0.0009 | 106.0863 | 118 | 17.8 | Diethanolamine                  |
| 106.0872 | 105     | 0       | 106.09   | 225 | 80.4 | Diethanolamine                  |
| 106.0872 | 105.079 | -0.0009 | 106.0863 | 188 | 19.6 | Diethanolamine                  |
| 106.0872 | 105.079 | -0.0009 | 106.0863 | 187 | 19.6 | Diethanolamine                  |
| 106.0872 | 105     | 0       | 106.09   | 159 | 78.3 | Diethanolamine                  |
| 106.0872 | 105.079 | -0.0009 | 106.0863 | 125 | 20.1 | Diethanolamine                  |
| 106.0872 | 105.079 | -0.0009 | 106.0863 | 124 | 20.1 | Diethanolamine                  |
| 84.0822  | 102.092 | -0.0014 | 84.0808  | 303 | 54.2 | Betaine aldehyde cation         |
| 84.0822  | 102.092 | -0.0014 | 84.0808  | 299 | 45.8 | Betaine aldehyde cation         |
| 84.0822  | 102.092 | -0.0014 | 84.0808  | 235 | 52   | Betaine aldehyde cation         |
| 84.0822  | 102.092 | -0.0014 | 84.0808  | 233 | 48   | Betaine aldehyde cation         |
| 84.0822  | 102.092 | -0.0014 | 84.0808  | 142 | 55.4 | Betaine aldehyde cation         |
| 84.0822  | 102.092 | -0.0014 | 84.0808  | 137 | 44.6 | Betaine aldehyde cation         |
| 148.0974 | 147     | -0.04   | 148.06   | 3   | 100  | O-acetyl-L-serine hydrochloride |
| 148.0974 | 147.053 | -0.037  | 148.0604 | 89  | 83.2 | O-Acetyl-L-serine               |
| 148.0974 | 147.053 | -0.037  | 148.0604 | 87  | 83.2 | O-Acetyl-L-serine               |
| 148.0974 | 147     | -0.04   | 148.06   | 38  | 16.8 | O-acetyl-L-serine hydrochloride |
| 148.0974 | 147.053 | -0.037  | 148.0604 | 130 | 69.7 | O-Acetyl-L-serine               |
| 148.0974 | 147     | -0.04   | 148.06   | 75  | 13.5 | O-acetyl-L-serine hydrochloride |
| 148.0974 | 147     | -0.04   | 148.06   | 64  | 9.3  | N-acetyl-DL-serine              |
| 118.0873 | 117.079 | -0.001  | 118.0863 | 349 | 98.5 | Betaine                         |
| 118.0873 | 117.079 | -0.001  | 118.0863 | 348 | 98.5 | Betaine                         |
| 118.0873 | 117.079 | -0.001  | 118.0863 | 347 | 98.5 | Betaine                         |
| 118.0873 | 117.079 | -0.001  | 118.0863 | 320 | 32.2 | Betaine                         |
| 118.0873 | 117.079 | -0.001  | 118.0863 | 320 | 32.2 | Betaine                         |
| 118.0873 | 117.079 | -0.001  | 118.0863 | 319 | 32.2 | Betaine                         |
| 118.0873 | 117.079 | -0.001  | 118.0863 | 389 | 51.3 | Betaine                         |
| 118.0873 | 117.079 | -0.001  | 118.0863 | 388 | 51.3 | Betaine                         |
| 118.0873 | 117.079 | -0.001  | 118.0863 | 387 | 51.3 | Betaine                         |
| 106.0872 | 105     | 0       | 106.09   | 189 | 72.4 | Diethanolamine                  |
| 106.0872 | 105.079 | -0.0009 | 106.0863 | 161 | 20.9 | Diethanolamine                  |
| 106.0872 | 105.079 | -0.0009 | 106.0863 | 159 | 20.9 | Diethanolamine                  |
| 106.0872 | 105     | 0       | 106.09   | 148 | 78.6 | Diethanolamine                  |
| 106.0872 | 105.079 | -0.0009 | 106.0863 | 117 | 21.4 | Diethanolamine                  |
| 106.0872 | 105.079 | -0.0009 | 106.0863 | 117 | 21.4 | Diethanolamine                  |
| 106.0872 | 105     | 0       | 106.09   | 155 | 71.7 | Diethanolamine                  |
| 106.0872 | 105.079 | -0.0009 | 106.0863 | 133 | 28.3 | Diethanolamine                  |
| 106.0872 | 105.079 | -0.0009 | 106.0863 | 132 | 28.3 | Diethanolamine                  |
| 186.0588 | 370.196 | 0.0467  | 186.1055 | 88  | 100  | Ser-His-Lys                     |

|          |         |         |          |     |      |                                 |
|----------|---------|---------|----------|-----|------|---------------------------------|
| 186.0588 | 163.084 | 0.0149  | 186.0737 | 140 | 100  | N,N-Bis(2-hydroxyethyl)glycine  |
| 186.0588 | 370.196 | 0.0467  | 186.1055 | 66  | 100  | Ser-His-Lys                     |
| 186.0588 | 163.084 | 0.0149  | 186.0737 | 135 | 100  | N,N-Bis(2-hydroxyethyl)glycine  |
| 97.0774  | 114.104 | 0.0238  | 97.1012  | 36  | 21.9 | Cyclohexanemethanol             |
| 97.0774  | 114.104 | 0.0238  | 97.1012  | 35  | 21   | Cyclohexanol, 4-methyl-, trans- |
| 97.0774  | 114.104 | 0.0238  | 97.1012  | 31  | 17.8 | Cyclohexanol, 1-methyl-         |
| 118.0873 | 117.079 | -0.001  | 118.0863 | 280 | 100  | Betaine                         |
| 118.0873 | 117.079 | -0.001  | 118.0863 | 279 | 100  | Betaine                         |
| 118.0873 | 117.079 | -0.001  | 118.0863 | 277 | 100  | Betaine                         |
| 118.0873 | 117.079 | -0.001  | 118.0863 | 300 | 64.9 | Betaine                         |
| 118.0873 | 117.079 | -0.001  | 118.0863 | 298 | 64.9 | Betaine                         |
| 118.0873 | 117.079 | -0.001  | 118.0863 | 296 | 64.9 | Betaine                         |
| 118.0873 | 117.079 | -0.001  | 118.0863 | 360 | 56.5 | Betaine                         |
| 118.0873 | 117.079 | -0.001  | 118.0863 | 356 | 56.5 | Betaine                         |
| 118.0873 | 117.079 | -0.001  | 118.0863 | 355 | 56.5 | Betaine                         |
| 106.0872 | 105     | 0       | 106.09   | 130 | 72.8 | Diethanolamine                  |
| 106.0872 | 105.079 | -0.0009 | 106.0863 | 98  | 19.4 | Diethanolamine                  |
| 106.0872 | 105.079 | -0.0009 | 106.0863 | 97  | 19.4 | Diethanolamine                  |
| 106.0872 | 105     | 0       | 106.09   | 236 | 74.9 | Diethanolamine                  |
| 106.0872 | 105.079 | -0.0009 | 106.0863 | 212 | 25.1 | Diethanolamine                  |
| 106.0872 | 105.079 | -0.0009 | 106.0863 | 211 | 25.1 | Diethanolamine                  |
| 84.0822  | 102.092 | -0.0014 | 84.0808  | 300 | 54.2 | Betaine aldehyde cation         |
| 84.0822  | 102.092 | -0.0014 | 84.0808  | 296 | 45.8 | Betaine aldehyde cation         |
| 84.0822  | 102.092 | -0.0014 | 84.0808  | 268 | 50   | Betaine aldehyde cation         |
| 84.0822  | 102.092 | -0.0014 | 84.0808  | 268 | 50   | Betaine aldehyde cation         |
| 84.0822  | 102.092 | -0.0014 | 84.0808  | 112 | 52   | Betaine aldehyde cation         |
| 84.0822  | 102.092 | -0.0014 | 84.0808  | 110 | 48   | Betaine aldehyde cation         |
| 84.0822  | 102.092 | -0.0014 | 84.0808  | 134 | 50   | Betaine aldehyde cation         |
| 84.0822  | 102.092 | -0.0014 | 84.0808  | 134 | 50   | Betaine aldehyde cation         |
| 186.0588 | 163.084 | 0.0149  | 186.0737 | 165 | 76.3 | N,N-Bis(2-hydroxyethyl)glycine  |
| 186.0588 | 163.084 | 0.0149  | 186.0737 | 154 | 76.3 | N,N-Bis(2-hydroxyethyl)glycine  |
| 186.0588 | 203.091 | 0.0285  | 186.0873 | 127 | 18.3 | Ala-Asn                         |
| 118.0873 | 117.079 | -0.001  | 118.0863 | 333 | 100  | Betaine                         |
| 118.0873 | 117.079 | -0.001  | 118.0863 | 330 | 100  | Betaine                         |
| 118.0873 | 117.079 | -0.001  | 118.0863 | 330 | 100  | Betaine                         |
| 118.0873 | 117.079 | -0.001  | 118.0863 | 415 | 38.8 | Betaine                         |
| 118.0873 | 117.079 | -0.001  | 118.0863 | 413 | 38.8 | Betaine                         |
| 118.0873 | 117.079 | -0.001  | 118.0863 | 408 | 38.8 | Betaine                         |
| 118.0873 | 117.079 | -0.001  | 118.0863 | 265 | 45.7 | Betaine                         |
| 118.0873 | 117.079 | -0.001  | 118.0863 | 264 | 45.7 | Betaine                         |
| 118.0873 | 117.079 | -0.001  | 118.0863 | 263 | 45.7 | Betaine                         |
| 118.0873 | 117.079 | -0.001  | 118.0863 | 411 | 28.8 | Betaine                         |
| 118.0873 | 117.079 | -0.001  | 118.0863 | 410 | 28.8 | Betaine                         |
| 118.0873 | 117     | 0       | 118.09   | 409 | 26.6 | Betaine                         |
| 106.0872 | 105     | 0       | 106.09   | 208 | 80.4 | Diethanolamine                  |
| 106.0872 | 105.079 | -0.0009 | 106.0863 | 171 | 19.6 | Diethanolamine                  |
| 106.0872 | 105.079 | -0.0009 | 106.0863 | 169 | 19.6 | Diethanolamine                  |

|          |         |         |          |     |      |                                 |
|----------|---------|---------|----------|-----|------|---------------------------------|
| 84.0822  | 102.092 | -0.0014 | 84.0808  | 293 | 51   | Betaine aldehyde cation         |
| 84.0822  | 102.092 | -0.0014 | 84.0808  | 292 | 49   | Betaine aldehyde cation         |
| 84.0822  | 102.092 | -0.0014 | 84.0808  | 296 | 55.4 | Betaine aldehyde cation         |
| 84.0822  | 102.092 | -0.0014 | 84.0808  | 291 | 44.6 | Betaine aldehyde cation         |
| 84.0822  | 102.092 | -0.0014 | 84.0808  | 202 | 51   | Betaine aldehyde cation         |
| 84.0822  | 102.092 | -0.0014 | 84.0808  | 201 | 49   | Betaine aldehyde cation         |
| 186.0588 | 370.196 | 0.0467  | 186.1055 | 43  | 100  | Ser-His-Lys                     |
| 186.0588 | 163.084 | 0.0149  | 186.0737 | 147 | 100  | N,N-Bis(2-hydroxyethyl)glycine  |
| 186.0588 | 163.084 | 0.0149  | 186.0737 | 135 | 100  | N,N-Bis(2-hydroxyethyl)glycine  |
| 106.0872 | 105.079 | -0.0009 | 106.0863 | 119 | 100  | Diethanolamine                  |
| 106.0872 | 105.079 | -0.0009 | 106.0863 | 118 | 100  | Diethanolamine                  |
| 106.0872 | 105.079 | -0.0009 | 106.0863 | 118 | 100  | Diethanolamine                  |
| 106.0872 | 105     | 0       | 106.09   | 158 | 75.2 | Diethanolamine                  |
| 106.0872 | 105.079 | -0.0009 | 106.0863 | 125 | 19.7 | Diethanolamine                  |
| 106.0872 | 105.079 | -0.0009 | 106.0863 | 125 | 19.7 | Diethanolamine                  |
| 106.0872 | 105     | 0       | 106.09   | 221 | 78.6 | Diethanolamine                  |
| 106.0872 | 105.079 | -0.0009 | 106.0863 | 190 | 21.4 | Diethanolamine                  |
| 106.0872 | 105.079 | -0.0009 | 106.0863 | 190 | 21.4 | Diethanolamine                  |
| 84.0822  | 102.092 | -0.0014 | 84.0808  | 259 | 52   | Betaine aldehyde cation         |
| 84.0822  | 102.092 | -0.0014 | 84.0808  | 257 | 48   | Betaine aldehyde cation         |
| 84.0822  | 102.092 | -0.0014 | 84.0808  | 186 | 50   | Betaine aldehyde cation         |
| 84.0822  | 102.092 | -0.0014 | 84.0808  | 186 | 50   | Betaine aldehyde cation         |
| 84.0822  | 102.092 | -0.0014 | 84.0808  | 145 | 50   | Betaine aldehyde cation         |
| 84.0822  | 102.092 | -0.0014 | 84.0808  | 145 | 50   | Betaine aldehyde cation         |
| 148.0974 | 147     | -0.04   | 148.06   | 12  | 28.7 | N-acetyl-DL-serine              |
| 148.0974 | 147.053 | -0.037  | 148.0604 | 9   | 25.4 | O-Acetyl-L-serine               |
| 148.0974 | 147     | -0.04   | 148.06   | 7   | 23.4 | O-acetyl-L-serine hydrochloride |
| 148.0974 | 147.053 | -0.037  | 148.0604 | 125 | 59   | O-Acetyl-L-serine               |
| 148.0974 | 147.053 | -0.037  | 148.0604 | 122 | 59   | O-Acetyl-L-serine               |
| 148.0974 | 147.053 | -0.037  | 148.0604 | 116 | 59   | O-Acetyl-L-serine               |
| 148.0974 | 147.053 | -0.037  | 148.0604 | 90  | 67.3 | O-Acetyl-L-serine               |
| 148.0974 | 147.053 | -0.037  | 148.0604 | 85  | 67.3 | O-Acetyl-L-serine               |
| 148.0974 | 147.053 | -0.037  | 148.0604 | 77  | 67.3 | O-Acetyl-L-serine               |
| 118.0873 | 117.079 | -0.001  | 118.0863 | 332 | 28.9 | Betaine                         |
| 118.0873 | 117.079 | -0.001  | 118.0863 | 332 | 28.9 | Betaine                         |
| 118.0873 | 117.079 | -0.001  | 118.0863 | 328 | 28.9 | Betaine                         |
| 118.0873 | 117.079 | -0.001  | 118.0863 | 219 | 100  | Betaine                         |
| 118.0873 | 117.079 | -0.001  | 118.0863 | 217 | 100  | Betaine                         |
| 118.0873 | 117.079 | -0.001  | 118.0863 | 217 | 100  | Betaine                         |
| 118.0873 | 117.079 | -0.001  | 118.0863 | 309 | 43.3 | Betaine                         |
| 118.0873 | 117.079 | -0.001  | 118.0863 | 308 | 43.3 | Betaine                         |
| 118.0873 | 117.079 | -0.001  | 118.0863 | 306 | 43.3 | Betaine                         |
| 186.0588 | 370.196 | 0.0467  | 186.1055 | 50  | 100  | Ser-His-Lys                     |
| 186.0588 | 370.196 | 0.0467  | 186.1055 | 50  | 100  | Ser-His-Lys                     |
| 186.0588 | 163.084 | 0.0149  | 186.0737 | 159 | 92.7 | N,N-Bis(2-hydroxyethyl)glycine  |
| 186.0588 | 370.196 | 0.0467  | 186.1055 | 62  | 7.3  | Ser-His-Lys                     |
| 118.0873 | 117.079 | -0.001  | 118.0863 | 251 | 100  | Betaine                         |



|          |         |         |          |     |      |                                |
|----------|---------|---------|----------|-----|------|--------------------------------|
| 118.0873 | 117.079 | -0.001  | 118.0863 | 249 | 100  | Betaine                        |
| 118.0873 | 117.079 | -0.001  | 118.0863 | 244 | 100  | Betaine                        |
| 118.0873 | 117.079 | -0.001  | 118.0863 | 386 | 56.7 | Betaine                        |
| 118.0873 | 117.079 | -0.001  | 118.0863 | 381 | 56.7 | Betaine                        |
| 118.0873 | 117.079 | -0.001  | 118.0863 | 377 | 56.7 | Betaine                        |
| 118.0873 | 117.079 | -0.001  | 118.0863 | 341 | 31.6 | Betaine                        |
| 118.0873 | 117.079 | -0.001  | 118.0863 | 341 | 31.6 | Betaine                        |
| 118.0873 | 117.079 | -0.001  | 118.0863 | 336 | 31.6 | Betaine                        |
| 118.0873 | 117.079 | -0.001  | 118.0863 | 384 | 49.7 | Betaine                        |
| 118.0873 | 117.079 | -0.001  | 118.0863 | 380 | 49.7 | Betaine                        |
| 118.0873 | 117.079 | -0.001  | 118.0863 | 380 | 49.7 | Betaine                        |
| 106.0872 | 105     | 0       | 106.09   | 155 | 78.9 | Diethanolamine                 |
| 106.0872 | 105.079 | -0.0009 | 106.0863 | 123 | 21.1 | Diethanolamine                 |
| 106.0872 | 105.079 | -0.0009 | 106.0863 | 123 | 21.1 | Diethanolamine                 |
| 106.0872 | 105     | 0       | 106.09   | 169 | 79.3 | Diethanolamine                 |
| 106.0872 | 105.079 | -0.0009 | 106.0863 | 136 | 20.7 | Diethanolamine                 |
| 106.0872 | 105.079 | -0.0009 | 106.0863 | 135 | 20.7 | Diethanolamine                 |
| 84.0822  | 102.092 | -0.0014 | 84.0808  | 318 | 52   | Betaine aldehyde cation        |
| 84.0822  | 102.092 | -0.0014 | 84.0808  | 316 | 48   | Betaine aldehyde cation        |
| 84.0822  | 102.092 | -0.0014 | 84.0808  | 223 | 51   | Betaine aldehyde cation        |
| 84.0822  | 102.092 | -0.0014 | 84.0808  | 222 | 49   | Betaine aldehyde cation        |
| 84.0822  | 102.092 | -0.0014 | 84.0808  | 198 | 53.1 | Betaine aldehyde cation        |
| 84.0822  | 102.092 | -0.0014 | 84.0808  | 195 | 46.9 | Betaine aldehyde cation        |
| 186.0588 | 163.084 | 0.0149  | 186.0737 | 114 | 83.5 | N,N-Bis(2-hydroxyethyl)glycine |
| 186.0588 | 163.084 | 0.0149  | 186.0737 | 95  | 83.5 | N,N-Bis(2-hydroxyethyl)glycine |
| 186.0588 | 203.091 | 0.0285  | 186.0873 | 61  | 16.5 | Ala-Asn                        |
| 186.0588 | 163.084 | 0.0149  | 186.0737 | 141 | 100  | N,N-Bis(2-hydroxyethyl)glycine |
| 118.0873 | 117.079 | -0.001  | 118.0863 | 402 | 37.4 | Betaine                        |
| 118.0873 | 117.079 | -0.001  | 118.0863 | 402 | 37.4 | Betaine                        |
| 118.0873 | 117.079 | -0.001  | 118.0863 | 398 | 37.4 | Betaine                        |
| 118.0873 | 117.079 | -0.001  | 118.0863 | 305 | 58.7 | Betaine                        |
| 118.0873 | 117.079 | -0.001  | 118.0863 | 303 | 58.7 | Betaine                        |
| 118.0873 | 117.079 | -0.001  | 118.0863 | 302 | 58.7 | Betaine                        |
| 118.0873 | 117.079 | -0.001  | 118.0863 | 329 | 66.4 | Betaine                        |
| 118.0873 | 117.079 | -0.001  | 118.0863 | 328 | 66.4 | Betaine                        |
| 118.0873 | 117.079 | -0.001  | 118.0863 | 324 | 66.4 | Betaine                        |
| 106.0872 | 105     | 0       | 106.09   | 159 | 74.9 | Diethanolamine                 |
| 106.0872 | 105.079 | -0.0009 | 106.0863 | 135 | 25.1 | Diethanolamine                 |
| 106.0872 | 105.079 | -0.0009 | 106.0863 | 135 | 25.1 | Diethanolamine                 |
| 106.0872 | 105     | 0       | 106.09   | 159 | 74.8 | Diethanolamine                 |
| 106.0872 | 105.079 | -0.0009 | 106.0863 | 125 | 19.2 | Diethanolamine                 |
| 106.0872 | 105.079 | -0.0009 | 106.0863 | 124 | 19.2 | Diethanolamine                 |
| 106.0872 | 105     | 0       | 106.09   | 148 | 79.6 | Diethanolamine                 |
| 106.0872 | 105.079 | -0.0009 | 106.0863 | 114 | 20.4 | Diethanolamine                 |
| 84.0822  | 102.092 | -0.0014 | 84.0808  | 297 | 54.2 | Betaine aldehyde cation        |
| 84.0822  | 102.092 | -0.0014 | 84.0808  | 293 | 45.8 | Betaine aldehyde cation        |
| 84.0822  | 102.092 | -0.0014 | 84.0808  | 223 | 52   | Betaine aldehyde cation        |

|          |         |         |          |     |      |                                 |
|----------|---------|---------|----------|-----|------|---------------------------------|
| 84.0822  | 102.092 | -0.0014 | 84.0808  | 221 | 48   | Betaine aldehyde cation         |
| 84.0822  | 102.092 | -0.0014 | 84.0808  | 115 | 53.1 | Betaine aldehyde cation         |
| 84.0822  | 102.092 | -0.0014 | 84.0808  | 112 | 46.9 | Betaine aldehyde cation         |
| 186.0588 | 370.196 | 0.0467  | 186.1055 | 74  | 100  | Ser-His-Lys                     |
| 186.0588 | 163.084 | 0.0149  | 186.0737 | 145 | 100  | N,N-Bis(2-hydroxyethyl)glycine  |
| 186.0588 | 163.084 | 0.0149  | 186.0737 | 93  | 100  | N,N-Bis(2-hydroxyethyl)glycine  |
| 186.0588 | 163.084 | 0.0149  | 186.0737 | 118 | 89.8 | N,N-Bis(2-hydroxyethyl)glycine  |
| 186.0588 | 370.196 | 0.0467  | 186.1055 | 39  | 10.2 | Ser-His-Lys                     |
| 97.0774  | 114.104 | 0.0238  | 97.1012  | 31  | 19.4 | Cyclohexanol, 1-methyl-         |
| 97.0774  | 114.104 | 0.0238  | 97.1012  | 31  | 19.4 | Cyclohexanol, 4-methyl-, trans- |
| 97.0774  | 114.104 | 0.0238  | 97.1012  | 31  | 19.4 | Cyclohexanol, 4-methyl-, trans- |
| 97.0774  | 114.104 | 0.0238  | 97.1012  | 31  | 30.8 | Cyclohexanemethanol             |
| 97.0774  | 114.104 | 0.0238  | 97.1012  | 26  | 30.8 | Cyclohexanemethanol             |
| 97.0774  | 114.104 | 0.0238  | 97.1012  | 23  | 23   | Cyclohexanol, 4-methyl-, trans- |
| 106.0872 | 105.079 | -0.0009 | 106.0863 | 138 | 100  | Diethanolamine                  |
| 106.0872 | 105.079 | -0.0009 | 106.0863 | 137 | 100  | Diethanolamine                  |
| 106.0872 | 105.079 | -0.0009 | 106.0863 | 136 | 100  | Diethanolamine                  |
| 106.0872 | 105     | 0       | 106.09   | 202 | 77.6 | Diethanolamine                  |
| 106.0872 | 105.079 | -0.0009 | 106.0863 | 174 | 22.4 | Diethanolamine                  |
| 106.0872 | 105.079 | -0.0009 | 106.0863 | 173 | 22.4 | Diethanolamine                  |
| 84.0822  | 102.092 | -0.0014 | 84.0808  | 296 | 51   | Betaine aldehyde cation         |
| 84.0822  | 102.092 | -0.0014 | 84.0808  | 295 | 49   | Betaine aldehyde cation         |
| 84.0822  | 102.092 | -0.0014 | 84.0808  | 244 | 53.1 | Betaine aldehyde cation         |
| 84.0822  | 102.092 | -0.0014 | 84.0808  | 241 | 46.9 | Betaine aldehyde cation         |
| 84.0822  | 102.092 | -0.0014 | 84.0808  | 225 | 51   | Betaine aldehyde cation         |
| 84.0822  | 102.092 | -0.0014 | 84.0808  | 224 | 49   | Betaine aldehyde cation         |
| 148.0974 | 147     | -0.04   | 148.06   | 47  | 100  | O-acetyl-L-serine hydrochloride |
| 148.0974 | 147.053 | -0.037  | 148.0604 | 222 | 64   | O-Acetyl-L-serine               |
| 148.0974 | 147.053 | -0.037  | 148.0604 | 209 | 64   | O-Acetyl-L-serine               |
| 148.0974 | 147     | -0.04   | 148.06   | 202 | 29.1 | O-acetyl-L-serine hydrochloride |
| 118.0873 | 117.079 | -0.001  | 118.0863 | 348 | 49.7 | Betaine                         |
| 118.0873 | 117.079 | -0.001  | 118.0863 | 347 | 49.7 | Betaine                         |
| 118.0873 | 117.079 | -0.001  | 118.0863 | 345 | 49.7 | Betaine                         |
| 118.0873 | 117.079 | -0.001  | 118.0863 | 300 | 40.4 | Betaine                         |
| 118.0873 | 117.079 | -0.001  | 118.0863 | 299 | 40.4 | Betaine                         |
| 118.0873 | 117.079 | -0.001  | 118.0863 | 297 | 40.4 | Betaine                         |
| 118.0873 | 117.079 | -0.001  | 118.0863 | 325 | 62.3 | Betaine                         |
| 118.0873 | 117.079 | -0.001  | 118.0863 | 324 | 62.3 | Betaine                         |
| 118.0873 | 117.079 | -0.001  | 118.0863 | 323 | 62.3 | Betaine                         |
| 186.0588 | 163.084 | 0.0149  | 186.0737 | 155 | 100  | N,N-Bis(2-hydroxyethyl)glycine  |
| 118.0873 | 117.079 | -0.001  | 118.0863 | 394 | 27.4 | Betaine                         |
| 118.0873 | 117.079 | -0.001  | 118.0863 | 393 | 27.4 | Betaine                         |
| 118.0873 | 117     | 0       | 118.09   | 393 | 26.4 | Betaine                         |
| 118.0873 | 117.079 | -0.001  | 118.0863 | 333 | 81.4 | Betaine                         |
| 118.0873 | 117.079 | -0.001  | 118.0863 | 325 | 81.4 | Betaine                         |
| 118.0873 | 117.079 | -0.001  | 118.0863 | 313 | 81.4 | Betaine                         |
| 118.0873 | 117.079 | -0.001  | 118.0863 | 362 | 69.9 | Betaine                         |

|          |         |         |          |     |      |                                 |
|----------|---------|---------|----------|-----|------|---------------------------------|
| 118.0873 | 117.079 | -0.001  | 118.0863 | 362 | 69.9 | Betaine                         |
| 118.0873 | 117.079 | -0.001  | 118.0863 | 359 | 69.9 | Betaine                         |
| 106.0872 | 105     | 0       | 106.09   | 156 | 74.4 | Diethanolamine                  |
| 106.0872 | 105.079 | -0.0009 | 106.0863 | 122 | 19.1 | Diethanolamine                  |
| 106.0872 | 105.079 | -0.0009 | 106.0863 | 121 | 19.1 | Diethanolamine                  |
| 106.0872 | 105     | 0       | 106.09   | 157 | 78.6 | Diethanolamine                  |
| 106.0872 | 105.079 | -0.0009 | 106.0863 | 126 | 21.4 | Diethanolamine                  |
| 106.0872 | 105.079 | -0.0009 | 106.0863 | 125 | 21.4 | Diethanolamine                  |
| 84.0822  | 102.092 | -0.0014 | 84.0808  | 287 | 51   | Betaine aldehyde cation         |
| 84.0822  | 102.092 | -0.0014 | 84.0808  | 286 | 49   | Betaine aldehyde cation         |
| 84.0822  | 102.092 | -0.0014 | 84.0808  | 224 | 52   | Betaine aldehyde cation         |
| 84.0822  | 102.092 | -0.0014 | 84.0808  | 222 | 48   | Betaine aldehyde cation         |
| 84.0822  | 102.092 | -0.0014 | 84.0808  | 210 | 52   | Betaine aldehyde cation         |
| 84.0822  | 102.092 | -0.0014 | 84.0808  | 208 | 48   | Betaine aldehyde cation         |
| 186.0588 | 163.084 | 0.0149  | 186.0737 | 127 | 83.1 | N,N-Bis(2-hydroxyethyl)glycine  |
| 186.0588 | 163.084 | 0.0149  | 186.0737 | 111 | 83.1 | N,N-Bis(2-hydroxyethyl)glycine  |
| 186.0588 | 203.091 | 0.0285  | 186.0873 | 77  | 16.9 | Ala-Asn                         |
| 186.0588 | 370.196 | 0.0467  | 186.1055 | 76  | 100  | Ser-His-Lys                     |
| 97.0774  | 114.104 | 0.0238  | 97.1012  | 47  | 24.6 | Cyclohexanol, 4-methyl-, trans- |
| 97.0774  | 114.104 | 0.0238  | 97.1012  | 41  | 19.4 | Cyclohexanol, 1-methyl-         |
| 97.0774  | 114.104 | 0.0238  | 97.1012  | 38  | 24.6 | Cyclohexanol, 4-methyl-, trans- |
| 118.0873 | 117.079 | -0.001  | 118.0863 | 229 | 100  | Betaine                         |
| 118.0873 | 117.079 | -0.001  | 118.0863 | 225 | 100  | Betaine                         |
| 118.0873 | 117.079 | -0.001  | 118.0863 | 222 | 100  | Betaine                         |
| 118.0873 | 117.079 | -0.001  | 118.0863 | 417 | 64.7 | Betaine                         |
| 118.0873 | 117.079 | -0.001  | 118.0863 | 411 | 64.7 | Betaine                         |
| 118.0873 | 117.079 | -0.001  | 118.0863 | 410 | 64.7 | Betaine                         |
| 118.0873 | 117.079 | -0.001  | 118.0863 | 329 | 36   | Betaine                         |
| 118.0873 | 117.079 | -0.001  | 118.0863 | 328 | 36   | Betaine                         |
| 118.0873 | 117.079 | -0.001  | 118.0863 | 326 | 36   | Betaine                         |
| 118.0873 | 117.079 | -0.001  | 118.0863 | 341 | 59.3 | Betaine                         |
| 118.0873 | 117.079 | -0.001  | 118.0863 | 340 | 59.3 | Betaine                         |
| 118.0873 | 117.079 | -0.001  | 118.0863 | 339 | 59.3 | Betaine                         |
| 106.0872 | 105     | 0       | 106.09   | 159 | 78.4 | Diethanolamine                  |
| 106.0872 | 105.079 | -0.0009 | 106.0863 | 125 | 20.1 | Diethanolamine                  |
| 106.0872 | 105.079 | -0.0009 | 106.0863 | 125 | 20.1 | Diethanolamine                  |
| 106.0872 | 105     | 0       | 106.09   | 157 | 75.7 | Diethanolamine                  |
| 106.0872 | 105.079 | -0.0009 | 106.0863 | 120 | 18.4 | Diethanolamine                  |
| 106.0872 | 105.079 | -0.0009 | 106.0863 | 120 | 18.4 | Diethanolamine                  |
| 106.0872 | 105     | 0       | 106.09   | 142 | 77.6 | Diethanolamine                  |
| 106.0872 | 105.079 | -0.0009 | 106.0863 | 114 | 22.4 | Diethanolamine                  |
| 106.0872 | 105.079 | -0.0009 | 106.0863 | 112 | 22.4 | Diethanolamine                  |
| 84.0822  | 102.092 | -0.0014 | 84.0808  | 300 | 52   | Betaine aldehyde cation         |
| 84.0822  | 102.092 | -0.0014 | 84.0808  | 298 | 48   | Betaine aldehyde cation         |
| 84.0822  | 102.092 | -0.0014 | 84.0808  | 232 | 54.2 | Betaine aldehyde cation         |
| 84.0822  | 102.092 | -0.0014 | 84.0808  | 228 | 45.8 | Betaine aldehyde cation         |
| 84.0822  | 102.092 | -0.0014 | 84.0808  | 121 | 55.4 | Betaine aldehyde cation         |

|          |         |         |          |     |      |                                 |
|----------|---------|---------|----------|-----|------|---------------------------------|
| 84.0822  | 102.092 | -0.0014 | 84.0808  | 116 | 44.6 | Betaine aldehyde cation         |
| 84.0822  | 102.092 | -0.0014 | 84.0808  | 228 | 55.4 | Betaine aldehyde cation         |
| 84.0822  | 102.092 | -0.0014 | 84.0808  | 223 | 44.6 | Betaine aldehyde cation         |
| 186.0588 | 203.095 | 0.0325  | 186.0913 | 112 | 60.2 | Indole-3-butyric acid           |
| 186.0588 | 203.095 | 0.0325  | 186.0913 | 105 | 60.2 | Indole-3-butyric acid           |
| 186.0588 | 203.095 | 0.0325  | 186.0913 | 98  | 60.2 | Indole-3-butyric acid           |
| 186.0588 | 370.196 | 0.0467  | 186.1055 | 63  | 60.8 | Ser-His-Lys                     |
| 186.0588 | 370.196 | 0.0467  | 186.1055 | 50  | 39.2 | Ser-His-Lys                     |
| 106.0872 | 105     | 0       | 106.09   | 203 | 66   | Diethanolamine                  |
| 106.0872 | 105.079 | -0.0009 | 106.0863 | 185 | 34   | Diethanolamine                  |
| 106.0872 | 105.079 | -0.0009 | 106.0863 | 185 | 34   | Diethanolamine                  |
| 106.0872 | 105     | 0       | 106.09   | 182 | 75.1 | Diethanolamine                  |
| 106.0872 | 105.079 | -0.0009 | 106.0863 | 151 | 20.5 | Diethanolamine                  |
| 106.0872 | 105.079 | -0.0009 | 106.0863 | 150 | 20.5 | Diethanolamine                  |
| 84.0822  | 102.092 | -0.0014 | 84.0808  | 293 | 55.4 | Betaine aldehyde cation         |
| 84.0822  | 102.092 | -0.0014 | 84.0808  | 288 | 44.6 | Betaine aldehyde cation         |
| 84.0822  | 102.092 | -0.0014 | 84.0808  | 245 | 53.1 | Betaine aldehyde cation         |
| 84.0822  | 102.092 | -0.0014 | 84.0808  | 242 | 46.9 | Betaine aldehyde cation         |
| 84.0822  | 102.092 | -0.0014 | 84.0808  | 210 | 55.4 | Betaine aldehyde cation         |
| 84.0822  | 102.092 | -0.0014 | 84.0808  | 205 | 44.6 | Betaine aldehyde cation         |
| 148.0974 | 147     | -0.04   | 148.06   | 26  | 57.9 | N-acetyl-DL-serine              |
| 148.0974 | 147     | -0.04   | 148.06   | 17  | 42.1 | O-acetyl-L-serine hydrochloride |
| 118.0873 | 117.079 | -0.001  | 118.0863 | 431 | 55.1 | Betaine                         |
| 118.0873 | 117.079 | -0.001  | 118.0863 | 431 | 55.1 | Betaine                         |
| 118.0873 | 117.079 | -0.001  | 118.0863 | 426 | 55.1 | Betaine                         |
| 118.0873 | 117.079 | -0.001  | 118.0863 | 289 | 74.3 | Betaine                         |
| 118.0873 | 117.079 | -0.001  | 118.0863 | 286 | 74.3 | Betaine                         |
| 118.0873 | 117.079 | -0.001  | 118.0863 | 286 | 74.3 | Betaine                         |
| 118.0873 | 117.079 | -0.001  | 118.0863 | 325 | 57.9 | Betaine                         |
| 118.0873 | 117.079 | -0.001  | 118.0863 | 324 | 57.9 | Betaine                         |
| 118.0873 | 117.079 | -0.001  | 118.0863 | 321 | 57.9 | Betaine                         |
| 106.0872 | 105     | 0       | 106.09   | 188 | 75.8 | Diethanolamine                  |
| 106.0872 | 105.079 | -0.0009 | 106.0863 | 151 | 18.4 | Diethanolamine                  |
| 106.0872 | 105.079 | -0.0009 | 106.0863 | 149 | 18.4 | Diethanolamine                  |
| 106.0872 | 105     | 0       | 106.09   | 252 | 77.6 | Diethanolamine                  |
| 106.0872 | 105.079 | -0.0009 | 106.0863 | 224 | 22.4 | Diethanolamine                  |
| 106.0872 | 105.079 | -0.0009 | 106.0863 | 223 | 22.4 | Diethanolamine                  |
| 84.0822  | 102.092 | -0.0014 | 84.0808  | 307 | 52   | Betaine aldehyde cation         |
| 84.0822  | 102.092 | -0.0014 | 84.0808  | 305 | 48   | Betaine aldehyde cation         |
| 84.0822  | 102.092 | -0.0014 | 84.0808  | 186 | 54.2 | Betaine aldehyde cation         |
| 84.0822  | 102.092 | -0.0014 | 84.0808  | 182 | 45.8 | Betaine aldehyde cation         |
| 84.0822  | 102.092 | -0.0014 | 84.0808  | 236 | 54.2 | Betaine aldehyde cation         |
| 84.0822  | 102.092 | -0.0014 | 84.0808  | 232 | 45.8 | Betaine aldehyde cation         |
| 186.0588 | 203.091 | 0.0285  | 186.0873 | 54  | 100  | Ala-Asn                         |
| 186.0588 | 163.084 | 0.0149  | 186.0737 | 166 | 100  | N,N-Bis(2-hydroxyethyl)glycine  |
| 148.0974 | 147     | -0.04   | 148.06   | 33  | 100  | O-acetyl-L-serine hydrochloride |
| 148.0974 | 147.053 | -0.037  | 148.0604 | 117 | 74.9 | O-Acetyl-L-serine               |

|          |         |         |          |     |      |                                 |
|----------|---------|---------|----------|-----|------|---------------------------------|
| 148.0974 | 147.053 | -0.037  | 148.0604 | 113 | 74.9 | O-Acetyl-L-serine               |
| 148.0974 | 147.053 | -0.037  | 148.0604 | 103 | 74.9 | O-Acetyl-L-serine               |
| 118.0873 | 117.079 | -0.001  | 118.0863 | 393 | 54.7 | Betaine                         |
| 118.0873 | 117.079 | -0.001  | 118.0863 | 391 | 54.7 | Betaine                         |
| 118.0873 | 117.079 | -0.001  | 118.0863 | 388 | 54.7 | Betaine                         |
| 118.0873 | 117.079 | -0.001  | 118.0863 | 274 | 63.3 | Betaine                         |
| 118.0873 | 117.079 | -0.001  | 118.0863 | 272 | 63.3 | Betaine                         |
| 118.0873 | 117.079 | -0.001  | 118.0863 | 270 | 63.3 | Betaine                         |
| 118.0873 | 117.079 | -0.001  | 118.0863 | 314 | 44.2 | Betaine                         |
| 118.0873 | 117.079 | -0.001  | 118.0863 | 312 | 44.2 | Betaine                         |
| 118.0873 | 117.079 | -0.001  | 118.0863 | 309 | 44.2 | Betaine                         |
| 186.0588 | 370.196 | 0.0467  | 186.1055 | 27  | 100  | Ser-His-Lys                     |
| 186.0588 | 370.196 | 0.0467  | 186.1055 | 76  | 100  | Ser-His-Lys                     |
| 148.0974 | 147.053 | -0.037  | 148.0604 | 123 | 62.3 | O-Acetyl-L-serine               |
| 148.0974 | 147.053 | -0.037  | 148.0604 | 115 | 62.3 | O-Acetyl-L-serine               |
| 148.0974 | 147     | -0.04   | 148.06   | 108 | 37.7 | O-acetyl-L-serine hydrochloride |
| 118.0873 | 117.079 | -0.001  | 118.0863 | 280 | 95.5 | Betaine                         |
| 118.0873 | 117.079 | -0.001  | 118.0863 | 278 | 95.5 | Betaine                         |
| 118.0873 | 117.079 | -0.001  | 118.0863 | 270 | 95.5 | Betaine                         |
| 118.0873 | 117.079 | -0.001  | 118.0863 | 414 | 54.1 | Betaine                         |
| 118.0873 | 117.079 | -0.001  | 118.0863 | 413 | 54.1 | Betaine                         |
| 118.0873 | 117.079 | -0.001  | 118.0863 | 411 | 54.1 | Betaine                         |
| 118.0873 | 117.079 | -0.001  | 118.0863 | 312 | 73   | Betaine                         |
| 118.0873 | 117.079 | -0.001  | 118.0863 | 309 | 73   | Betaine                         |
| 118.0873 | 117.079 | -0.001  | 118.0863 | 306 | 73   | Betaine                         |
| 118.0873 | 117.079 | -0.001  | 118.0863 | 271 | 60.3 | Betaine                         |
| 118.0873 | 117.079 | -0.001  | 118.0863 | 269 | 60.3 | Betaine                         |
| 118.0873 | 117.079 | -0.001  | 118.0863 | 266 | 60.3 | Betaine                         |
| 106.0872 | 105     | 0       | 106.09   | 157 | 72.6 | Diethanolamine                  |
| 106.0872 | 105.079 | -0.0009 | 106.0863 | 129 | 21   | Diethanolamine                  |
| 106.0872 | 105.079 | -0.0009 | 106.0863 | 129 | 21   | Diethanolamine                  |
| 106.0872 | 105     | 0       | 106.09   | 154 | 74.1 | Diethanolamine                  |
| 106.0872 | 105.079 | -0.0009 | 106.0863 | 121 | 19.4 | Diethanolamine                  |
| 106.0872 | 105.079 | -0.0009 | 106.0863 | 121 | 19.4 | Diethanolamine                  |
| 106.0872 | 105     | 0       | 106.09   | 158 | 79.6 | Diethanolamine                  |
| 106.0872 | 105.079 | -0.0009 | 106.0863 | 124 | 20.4 | Diethanolamine                  |
| 106.0872 | 105.079 | -0.0009 | 106.0863 | 123 | 20.4 | Diethanolamine                  |
| 84.0822  | 102.092 | -0.0014 | 84.0808  | 309 | 53.1 | Betaine aldehyde cation         |
| 84.0822  | 102.092 | -0.0014 | 84.0808  | 306 | 46.9 | Betaine aldehyde cation         |
| 84.0822  | 102.092 | -0.0014 | 84.0808  | 279 | 53.1 | Betaine aldehyde cation         |
| 84.0822  | 102.092 | -0.0014 | 84.0808  | 276 | 46.9 | Betaine aldehyde cation         |
| 84.0822  | 102.092 | -0.0014 | 84.0808  | 244 | 51   | Betaine aldehyde cation         |
| 84.0822  | 102.092 | -0.0014 | 84.0808  | 243 | 49   | Betaine aldehyde cation         |
| 186.0588 | 163.084 | 0.0149  | 186.0737 | 89  | 74.8 | N,N-Bis(2-hydroxyethyl)glycine  |
| 186.0588 | 203.091 | 0.0285  | 186.0873 | 59  | 20.8 | Ala-Asn                         |
| 186.0588 | 163.084 | 0.0149  | 186.0737 | 18  | 74.8 | N,N-Bis(2-hydroxyethyl)glycine  |
| 97.0774  | 114.104 | 0.0238  | 97.1012  | 42  | 23.6 | Cyclohexanol, 4-methyl-, trans- |

|          |         |         |          |     |      |                                 |
|----------|---------|---------|----------|-----|------|---------------------------------|
| 97.0774  | 114.104 | 0.0238  | 97.1012  | 40  | 21.8 | Cyclohexanemethanol             |
| 97.0774  | 114.104 | 0.0238  | 97.1012  | 34  | 17.1 | Cyclohexanol, 1-methyl-         |
| 106.0872 | 105     | 0       | 106.09   | 159 | 74.9 | Diethanolamine                  |
| 106.0872 | 105.079 | -0.0009 | 106.0863 | 127 | 20   | Diethanolamine                  |
| 106.0872 | 105.079 | -0.0009 | 106.0863 | 126 | 20   | Diethanolamine                  |
| 84.0822  | 102.092 | -0.0014 | 84.0808  | 278 | 52   | Betaine aldehyde cation         |
| 84.0822  | 102.092 | -0.0014 | 84.0808  | 276 | 48   | Betaine aldehyde cation         |
| 84.0822  | 102.092 | -0.0014 | 84.0808  | 261 | 55.4 | Betaine aldehyde cation         |
| 84.0822  | 102.092 | -0.0014 | 84.0808  | 256 | 44.6 | Betaine aldehyde cation         |
| 148.0974 | 147.053 | -0.037  | 148.0604 | 120 | 68.7 | O-Acetyl-L-serine               |
| 148.0974 | 147.053 | -0.037  | 148.0604 | 113 | 68.7 | O-Acetyl-L-serine               |
| 148.0974 | 147.053 | -0.037  | 148.0604 | 102 | 68.7 | O-Acetyl-L-serine               |
| 148.0974 | 147     | -0.04   | 148.06   | 59  | 100  | O-acetyl-L-serine hydrochloride |
| 118.0873 | 117.079 | -0.001  | 118.0863 | 361 | 45.1 | Betaine                         |
| 118.0873 | 117.079 | -0.001  | 118.0863 | 358 | 45.1 | Betaine                         |
| 118.0873 | 117.079 | -0.001  | 118.0863 | 355 | 45.1 | Betaine                         |
| 118.0873 | 117.079 | -0.001  | 118.0863 | 281 | 61.1 | Betaine                         |
| 118.0873 | 117.079 | -0.001  | 118.0863 | 281 | 61.1 | Betaine                         |
| 118.0873 | 117.079 | -0.001  | 118.0863 | 278 | 61.1 | Betaine                         |
| 118.0873 | 117.079 | -0.001  | 118.0863 | 319 | 54.9 | Betaine                         |
| 118.0873 | 117.079 | -0.001  | 118.0863 | 319 | 54.9 | Betaine                         |
| 118.0873 | 117.079 | -0.001  | 118.0863 | 317 | 54.9 | Betaine                         |
| 186.0588 | 203.091 | 0.0285  | 186.0873 | 83  | 82.7 | Ala-Asn                         |
| 186.0588 | 168.042 | 0.0173  | 186.0761 | 36  | 17.3 | 3-Hydroxy-4-methoxybenzoic acid |
| 118.0873 | 117.079 | -0.001  | 118.0863 | 260 | 71.2 | Betaine                         |
| 118.0873 | 117.079 | -0.001  | 118.0863 | 258 | 71.2 | Betaine                         |
| 118.0873 | 117.079 | -0.001  | 118.0863 | 256 | 71.2 | Betaine                         |
| 118.0873 | 117.079 | -0.001  | 118.0863 | 293 | 64.4 | Betaine                         |
| 118.0873 | 117.079 | -0.001  | 118.0863 | 291 | 64.4 | Betaine                         |
| 118.0873 | 117.079 | -0.001  | 118.0863 | 281 | 64.4 | Betaine                         |
| 118.0873 | 117.079 | -0.001  | 118.0863 | 318 | 75.5 | Betaine                         |
| 118.0873 | 117.079 | -0.001  | 118.0863 | 314 | 75.5 | Betaine                         |
| 118.0873 | 117.079 | -0.001  | 118.0863 | 302 | 75.5 | Betaine                         |
| 118.0873 | 117.079 | -0.001  | 118.0863 | 323 | 49.9 | Betaine                         |
| 118.0873 | 117.079 | -0.001  | 118.0863 | 322 | 49.9 | Betaine                         |
| 118.0873 | 117.079 | -0.001  | 118.0863 | 320 | 49.9 | Betaine                         |
| 106.0872 | 105     | 0       | 106.09   | 159 | 74.9 | Diethanolamine                  |
| 106.0872 | 105.079 | -0.0009 | 106.0863 | 127 | 20   | Diethanolamine                  |
| 106.0872 | 105.079 | -0.0009 | 106.0863 | 126 | 20   | Diethanolamine                  |
| 106.0872 | 105     | 0       | 106.09   | 208 | 74.4 | Diethanolamine                  |
| 106.0872 | 105.079 | -0.0009 | 106.0863 | 180 | 21.5 | Diethanolamine                  |
| 106.0872 | 105.079 | -0.0009 | 106.0863 | 180 | 21.5 | Diethanolamine                  |
| 106.0872 | 105     | 0       | 106.09   | 303 | 76.9 | Diethanolamine                  |
| 106.0872 | 105.079 | -0.0009 | 106.0863 | 277 | 23.1 | Diethanolamine                  |
| 106.0872 | 105.079 | -0.0009 | 106.0863 | 276 | 23.1 | Diethanolamine                  |
| 84.0822  | 102.092 | -0.0014 | 84.0808  | 328 | 54.2 | Betaine aldehyde cation         |

|          |         |         |          |     |      |                                |
|----------|---------|---------|----------|-----|------|--------------------------------|
| 84.0822  | 102.092 | -0.0014 | 84.0808  | 324 | 45.8 | Betaine aldehyde cation        |
| 84.0822  | 102.092 | -0.0014 | 84.0808  | 231 | 53.1 | Betaine aldehyde cation        |
| 84.0822  | 102.092 | -0.0014 | 84.0808  | 228 | 46.9 | Betaine aldehyde cation        |
| 84.0822  | 102.092 | -0.0014 | 84.0808  | 124 | 53.1 | Betaine aldehyde cation        |
| 84.0822  | 102.092 | -0.0014 | 84.0808  | 121 | 46.9 | Betaine aldehyde cation        |
| 84.0822  | 102.092 | -0.0014 | 84.0808  | 199 | 51   | Betaine aldehyde cation        |
| 84.0822  | 102.092 | -0.0014 | 84.0808  | 198 | 49   | Betaine aldehyde cation        |
| 186.0588 | 370.196 | 0.0467  | 186.1055 | 83  | 100  | Ser-His-Lys                    |
| 186.0588 | 370.196 | 0.0467  | 186.1055 | 35  | 100  | Ser-His-Lys                    |
| 118.0873 | 117.079 | -0.001  | 118.0863 | 259 | 85.3 | Betaine                        |
| 118.0873 | 117.079 | -0.001  | 118.0863 | 259 | 85.3 | Betaine                        |
| 118.0873 | 117.079 | -0.001  | 118.0863 | 256 | 85.3 | Betaine                        |
| 118.0873 | 117.079 | -0.001  | 118.0863 | 403 | 97.4 | Betaine                        |
| 118.0873 | 117.079 | -0.001  | 118.0863 | 403 | 97.4 | Betaine                        |
| 118.0873 | 117.079 | -0.001  | 118.0863 | 401 | 97.4 | Betaine                        |
| 118.0873 | 117.079 | -0.001  | 118.0863 | 292 | 68.4 | Betaine                        |
| 118.0873 | 117.079 | -0.001  | 118.0863 | 290 | 68.4 | Betaine                        |
| 118.0873 | 117.079 | -0.001  | 118.0863 | 287 | 68.4 | Betaine                        |
| 118.0873 | 117.079 | -0.001  | 118.0863 | 407 | 40.4 | Betaine                        |
| 118.0873 | 117.079 | -0.001  | 118.0863 | 406 | 40.4 | Betaine                        |
| 118.0873 | 117.079 | -0.001  | 118.0863 | 402 | 40.4 | Betaine                        |
| 106.0872 | 105     | 0       | 106.09   | 195 | 76.2 | Diethanolamine                 |
| 106.0872 | 105.079 | -0.0009 | 106.0863 | 161 | 19.5 | Diethanolamine                 |
| 106.0872 | 105.079 | -0.0009 | 106.0863 | 161 | 19.5 | Diethanolamine                 |
| 84.0822  | 102.092 | -0.0014 | 84.0808  | 307 | 52   | Betaine aldehyde cation        |
| 84.0822  | 102.092 | -0.0014 | 84.0808  | 305 | 48   | Betaine aldehyde cation        |
| 84.0822  | 102.092 | -0.0014 | 84.0808  | 251 | 54.2 | Betaine aldehyde cation        |
| 84.0822  | 102.092 | -0.0014 | 84.0808  | 247 | 45.8 | Betaine aldehyde cation        |
| 84.0822  | 102.092 | -0.0014 | 84.0808  | 229 | 53.1 | Betaine aldehyde cation        |
| 84.0822  | 102.092 | -0.0014 | 84.0808  | 226 | 46.9 | Betaine aldehyde cation        |
| 186.0588 | 370.196 | 0.0467  | 186.1055 | 39  | 59.3 | Ser-His-Lys                    |
| 186.0588 | 370.196 | 0.0467  | 186.1055 | 28  | 40.7 | Ser-His-Lys                    |
| 186.0588 | 163.084 | 0.0149  | 186.0737 | 133 | 83.3 | N,N-Bis(2-hydroxyethyl)glycine |
| 186.0588 | 370.196 | 0.0467  | 186.1055 | 81  | 16.6 | Ser-His-Lys                    |
| 106.0872 | 105     | 0       | 106.09   | 159 | 73.9 | Diethanolamine                 |
| 106.0872 | 105.079 | -0.0009 | 106.0863 | 130 | 20.9 | Diethanolamine                 |
| 106.0872 | 105.079 | -0.0009 | 106.0863 | 130 | 20.9 | Diethanolamine                 |
| 106.0872 | 105     | 0       | 106.09   | 158 | 74.8 | Diethanolamine                 |
| 106.0872 | 105.079 | -0.0009 | 106.0863 | 126 | 20   | Diethanolamine                 |
| 106.0872 | 105.079 | -0.0009 | 106.0863 | 126 | 20   | Diethanolamine                 |
| 106.0872 | 105.079 | -0.0009 | 106.0863 | 118 | 100  | Diethanolamine                 |
| 106.0872 | 105.079 | -0.0009 | 106.0863 | 117 | 100  | Diethanolamine                 |
| 106.0872 | 105.079 | -0.0009 | 106.0863 | 116 | 100  | Diethanolamine                 |
| 84.0822  | 102.092 | -0.0014 | 84.0808  | 292 | 51   | Betaine aldehyde cation        |
| 84.0822  | 102.092 | -0.0014 | 84.0808  | 291 | 49   | Betaine aldehyde cation        |
| 84.0822  | 102.092 | -0.0014 | 84.0808  | 239 | 51   | Betaine aldehyde cation        |
| 84.0822  | 102.092 | -0.0014 | 84.0808  | 238 | 49   | Betaine aldehyde cation        |

|          |         |         |          |     |      |                                 |
|----------|---------|---------|----------|-----|------|---------------------------------|
| 84.0822  | 102.092 | -0.0014 | 84.0808  | 146 | 56   | Betaine aldehyde cation         |
| 84.0822  | 102.092 | -0.0014 | 84.0808  | 140 | 44   | Betaine aldehyde cation         |
| 148.0974 | 147     | -0.04   | 148.06   | 28  | 100  | O-acetyl-L-serine hydrochloride |
| 118.0873 | 117.079 | -0.001  | 118.0863 | 378 | 100  | Betaine                         |
| 118.0873 | 117.079 | -0.001  | 118.0863 | 376 | 100  | Betaine                         |
| 118.0873 | 117.079 | -0.001  | 118.0863 | 370 | 100  | Betaine                         |
| 118.0873 | 117.079 | -0.001  | 118.0863 | 301 | 67.3 | Betaine                         |
| 118.0873 | 117.079 | -0.001  | 118.0863 | 301 | 67.3 | Betaine                         |
| 118.0873 | 117.079 | -0.001  | 118.0863 | 297 | 67.3 | Betaine                         |
| 118.0873 | 117.079 | -0.001  | 118.0863 | 356 | 38.2 | Betaine                         |
| 118.0873 | 117.079 | -0.001  | 118.0863 | 355 | 38.2 | Betaine                         |
| 118.0873 | 117.079 | -0.001  | 118.0863 | 349 | 38.2 | Betaine                         |
| 106.0872 | 105     | 0       | 106.09   | 158 | 80.9 | Diethanolamine                  |
| 106.0872 | 105.079 | -0.0009 | 106.0863 | 119 | 19.1 | Diethanolamine                  |
| 106.0872 | 105.079 | -0.0009 | 106.0863 | 118 | 19.1 | Diethanolamine                  |
| 106.0872 | 105     | 0       | 106.09   | 212 | 77.7 | Diethanolamine                  |
| 106.0872 | 105.079 | -0.0009 | 106.0863 | 174 | 18.6 | Diethanolamine                  |
| 106.0872 | 105.079 | -0.0009 | 106.0863 | 174 | 18.6 | Diethanolamine                  |
| 84.0822  | 102.092 | -0.0014 | 84.0808  | 267 | 51   | Betaine aldehyde cation         |
| 84.0822  | 102.092 | -0.0014 | 84.0808  | 266 | 49   | Betaine aldehyde cation         |
| 84.0822  | 102.092 | -0.0014 | 84.0808  | 266 | 52   | Betaine aldehyde cation         |
| 84.0822  | 102.092 | -0.0014 | 84.0808  | 264 | 48   | Betaine aldehyde cation         |
| 84.0822  | 102.092 | -0.0014 | 84.0808  | 161 | 52   | Betaine aldehyde cation         |
| 84.0822  | 102.092 | -0.0014 | 84.0808  | 159 | 48   | Betaine aldehyde cation         |
| 84.0822  | 102.092 | -0.0014 | 84.0808  | 157 | 54.2 | Betaine aldehyde cation         |
| 84.0822  | 102.092 | -0.0014 | 84.0808  | 153 | 45.8 | Betaine aldehyde cation         |
| 186.0588 | 163.084 | 0.0149  | 186.0737 | 173 | 95.7 | N,N-Bis(2-hydroxyethyl)glycine  |
| 186.0588 | 163.084 | 0.0149  | 186.0737 | 100 | 95.7 | N,N-Bis(2-hydroxyethyl)glycine  |
| 186.0588 | 370.196 | 0.0467  | 186.1055 | 48  | 4.3  | Ser-His-Lys                     |
| 186.0588 | 163.084 | 0.0149  | 186.0737 | 148 | 100  | N,N-Bis(2-hydroxyethyl)glycine  |
| 186.0588 | 163.084 | 0.0149  | 186.0737 | 154 | 100  | N,N-Bis(2-hydroxyethyl)glycine  |
| 118.0873 | 117.079 | -0.001  | 118.0863 | 342 | 56.5 | Betaine                         |
| 118.0873 | 117.079 | -0.001  | 118.0863 | 335 | 56.5 | Betaine                         |
| 118.0873 | 117.079 | -0.001  | 118.0863 | 334 | 56.5 | Betaine                         |
| 118.0873 | 117.079 | -0.001  | 118.0863 | 292 | 64.5 | Betaine                         |
| 118.0873 | 117.079 | -0.001  | 118.0863 | 292 | 64.5 | Betaine                         |
| 118.0873 | 117.079 | -0.001  | 118.0863 | 289 | 64.5 | Betaine                         |
| 118.0873 | 117.079 | -0.001  | 118.0863 | 390 | 37.8 | Betaine                         |
| 118.0873 | 117.079 | -0.001  | 118.0863 | 389 | 37.8 | Betaine                         |
| 118.0873 | 117.079 | -0.001  | 118.0863 | 384 | 37.8 | Betaine                         |
| 84.0822  | 102.092 | -0.0014 | 84.0808  | 297 | 53.1 | Betaine aldehyde cation         |
| 84.0822  | 102.092 | -0.0014 | 84.0808  | 294 | 46.9 | Betaine aldehyde cation         |
| 84.0822  | 102.092 | -0.0014 | 84.0808  | 252 | 53.1 | Betaine aldehyde cation         |
| 84.0822  | 102.092 | -0.0014 | 84.0808  | 249 | 46.9 | Betaine aldehyde cation         |
| 84.0822  | 102.092 | -0.0014 | 84.0808  | 217 | 52   | Betaine aldehyde cation         |
| 84.0822  | 102.092 | -0.0014 | 84.0808  | 215 | 48   | Betaine aldehyde cation         |
| 186.0588 | 370.196 | 0.0467  | 186.1055 | 30  | 100  | Ser-His-Lys                     |



|          |         |         |          |     |      |                                 |
|----------|---------|---------|----------|-----|------|---------------------------------|
| 148.0974 | 147.053 | -0.037  | 148.0604 | 94  | 59.4 | O-Acetyl-L-serine               |
| 148.0974 | 147     | -0.04   | 148.06   | 73  | 25.3 | O-acetyl-L-serine hydrochloride |
| 148.0974 | 147     | -0.04   | 148.06   | 58  | 15.3 | O-acetyl-L-serine hydrochloride |
| 97.0774  | 114.104 | 0.0238  | 97.1012  | 27  | 26.4 | Cyclohexanemethanol             |
| 97.0774  | 114.104 | 0.0238  | 97.1012  | 24  | 26.4 | Cyclohexanemethanol             |
| 97.0774  | 114.104 | 0.0238  | 97.1012  | 22  | 21.3 | Cyclohexanol, 4-methyl-, trans- |
| 118.0873 | 117.079 | -0.001  | 118.0863 | 352 | 99   | Betaine                         |
| 118.0873 | 117.079 | -0.001  | 118.0863 | 349 | 99   | Betaine                         |
| 118.0873 | 117.079 | -0.001  | 118.0863 | 349 | 99   | Betaine                         |
| 118.0873 | 117.079 | -0.001  | 118.0863 | 312 | 98.6 | Betaine                         |
| 118.0873 | 117.079 | -0.001  | 118.0863 | 308 | 98.6 | Betaine                         |
| 118.0873 | 117.079 | -0.001  | 118.0863 | 305 | 98.6 | Betaine                         |
| 118.0873 | 117.079 | -0.001  | 118.0863 | 347 | 44.6 | Betaine                         |
| 118.0873 | 117.079 | -0.001  | 118.0863 | 345 | 44.6 | Betaine                         |
| 118.0873 | 117.079 | -0.001  | 118.0863 | 343 | 44.6 | Betaine                         |
| 106.0872 | 105     | 0       | 106.09   | 191 | 71.7 | Diethanolamine                  |
| 106.0872 | 105.079 | -0.0009 | 106.0863 | 166 | 21.9 | Diethanolamine                  |
| 106.0872 | 105.079 | -0.0009 | 106.0863 | 161 | 21.9 | Diethanolamine                  |
| 106.0872 | 105     | 0       | 106.09   | 173 | 78.8 | Diethanolamine                  |
| 106.0872 | 105.079 | -0.0009 | 106.0863 | 134 | 18.6 | Diethanolamine                  |
| 106.0872 | 105.079 | -0.0009 | 106.0863 | 133 | 18.6 | Diethanolamine                  |
| 106.0872 | 105.079 | -0.0009 | 106.0863 | 217 | 100  | Diethanolamine                  |
| 106.0872 | 105.079 | -0.0009 | 106.0863 | 216 | 100  | Diethanolamine                  |
| 106.0872 | 105.079 | -0.0009 | 106.0863 | 213 | 100  | Diethanolamine                  |
| 84.0822  | 102.092 | -0.0014 | 84.0808  | 300 | 53.1 | Betaine aldehyde cation         |
| 84.0822  | 102.092 | -0.0014 | 84.0808  | 297 | 46.9 | Betaine aldehyde cation         |
| 84.0822  | 102.092 | -0.0014 | 84.0808  | 253 | 53.1 | Betaine aldehyde cation         |
| 84.0822  | 102.092 | -0.0014 | 84.0808  | 250 | 46.9 | Betaine aldehyde cation         |
| 84.0822  | 102.092 | -0.0014 | 84.0808  | 167 | 56   | Betaine aldehyde cation         |
| 84.0822  | 102.092 | -0.0014 | 84.0808  | 161 | 44   | Betaine aldehyde cation         |
| 186.0588 | 163.084 | 0.0149  | 186.0737 | 149 | 41.4 | N,N-Bis(2-hydroxyethyl)glycine  |
| 186.0588 | 203.091 | 0.0285  | 186.0873 | 139 | 29.2 | Ala-Asn                         |
| 186.0588 | 203.095 | 0.0325  | 186.0913 | 138 | 28.1 | Indole-3-butyric acid           |
| 186.0588 | 163.084 | 0.0149  | 186.0737 | 180 | 100  | N,N-Bis(2-hydroxyethyl)glycine  |
| 186.0588 | 163.084 | 0.0149  | 186.0737 | 106 | 100  | N,N-Bis(2-hydroxyethyl)glycine  |
| 106.0872 | 105     | 0       | 106.09   | 230 | 61.9 | Diethanolamine                  |
| 106.0872 | 105.079 | -0.0009 | 106.0863 | 213 | 33.8 | Diethanolamine                  |
| 106.0872 | 105.079 | -0.0009 | 106.0863 | 211 | 33.8 | Diethanolamine                  |
| 106.0872 | 105     | 0       | 106.09   | 262 | 64.7 | Diethanolamine                  |
| 106.0872 | 105.079 | -0.0009 | 106.0863 | 245 | 35.3 | Diethanolamine                  |
| 106.0872 | 105.079 | -0.0009 | 106.0863 | 244 | 35.3 | Diethanolamine                  |
| 84.0822  | 102.092 | -0.0014 | 84.0808  | 302 | 50   | Betaine aldehyde cation         |
| 84.0822  | 102.092 | -0.0014 | 84.0808  | 302 | 50   | Betaine aldehyde cation         |
| 84.0822  | 102.092 | -0.0014 | 84.0808  | 238 | 51   | Betaine aldehyde cation         |
| 84.0822  | 102.092 | -0.0014 | 84.0808  | 237 | 49   | Betaine aldehyde cation         |
| 84.0822  | 102.092 | -0.0014 | 84.0808  | 120 | 52   | Betaine aldehyde cation         |
| 84.0822  | 102.092 | -0.0014 | 84.0808  | 118 | 48   | Betaine aldehyde cation         |

|          |         |         |          |     |      |                                 |
|----------|---------|---------|----------|-----|------|---------------------------------|
| 84.0822  | 102.092 | -0.0014 | 84.0808  | 171 | 54.2 | Betaine aldehyde cation         |
| 84.0822  | 102.092 | -0.0014 | 84.0808  | 167 | 45.8 | Betaine aldehyde cation         |
| 148.0974 | 147     | -0.04   | 148.06   | 28  | 30.3 | N-acetyl-DL-serine              |
| 148.0974 | 147     | -0.04   | 148.06   | 25  | 26.8 | O-acetyl-L-serine hydrochloride |
| 148.0974 | 147     | -0.04   | 148.06   | 24  | 25.7 | O-acetyl-L-serine hydrochloride |
| 148.0974 | 147.053 | -0.037  | 148.0604 | 108 | 76.6 | O-Acetyl-L-serine               |
| 148.0974 | 147.053 | -0.037  | 148.0604 | 103 | 76.6 | O-Acetyl-L-serine               |
| 148.0974 | 147.053 | -0.037  | 148.0604 | 94  | 76.6 | O-Acetyl-L-serine               |
| 118.0873 | 117.079 | -0.001  | 118.0863 | 224 | 100  | Betaine                         |
| 118.0873 | 117.079 | -0.001  | 118.0863 | 220 | 100  | Betaine                         |
| 118.0873 | 117.079 | -0.001  | 118.0863 | 212 | 100  | Betaine                         |
| 118.0873 | 117.079 | -0.001  | 118.0863 | 417 | 40.4 | Betaine                         |
| 118.0873 | 117.079 | -0.001  | 118.0863 | 415 | 40.4 | Betaine                         |
| 118.0873 | 117.079 | -0.001  | 118.0863 | 410 | 40.4 | Betaine                         |
| 118.0873 | 117.079 | -0.001  | 118.0863 | 326 | 59.1 | Betaine                         |
| 118.0873 | 117.079 | -0.001  | 118.0863 | 324 | 59.1 | Betaine                         |
| 118.0873 | 117.079 | -0.001  | 118.0863 | 321 | 59.1 | Betaine                         |
| 118.0873 | 117.079 | -0.001  | 118.0863 | 323 | 38   | Betaine                         |
| 118.0873 | 117.079 | -0.001  | 118.0863 | 322 | 38   | Betaine                         |
| 118.0873 | 117.079 | -0.001  | 118.0863 | 321 | 38   | Betaine                         |
| 106.0872 | 105     | 0       | 106.09   | 133 | 73.3 | Diethanolamine                  |
| 106.0872 | 105.079 | -0.0009 | 106.0863 | 98  | 18.4 | Diethanolamine                  |
| 106.0872 | 105.079 | -0.0009 | 106.0863 | 98  | 18.4 | Diethanolamine                  |
| 106.0872 | 105     | 0       | 106.09   | 156 | 74.4 | Diethanolamine                  |
| 106.0872 | 105.079 | -0.0009 | 106.0863 | 122 | 19.1 | Diethanolamine                  |
| 106.0872 | 105.079 | -0.0009 | 106.0863 | 121 | 19.1 | Diethanolamine                  |
| 84.0822  | 102.092 | -0.0014 | 84.0808  | 297 | 50   | Betaine aldehyde cation         |
| 84.0822  | 102.092 | -0.0014 | 84.0808  | 297 | 50   | Betaine aldehyde cation         |
| 84.0822  | 102.092 | -0.0014 | 84.0808  | 216 | 51   | Betaine aldehyde cation         |
| 84.0822  | 102.092 | -0.0014 | 84.0808  | 215 | 49   | Betaine aldehyde cation         |
| 84.0822  | 102.092 | -0.0014 | 84.0808  | 192 | 53.1 | Betaine aldehyde cation         |
| 84.0822  | 102.092 | -0.0014 | 84.0808  | 189 | 46.9 | Betaine aldehyde cation         |
| 186.0588 | 163.084 | 0.0149  | 186.0737 | 173 | 100  | N,N-Bis(2-hydroxyethyl)glycine  |
| 186.0588 | 163.084 | 0.0149  | 186.0737 | 140 | 100  | N,N-Bis(2-hydroxyethyl)glycine  |
| 186.0588 | 163.084 | 0.0149  | 186.0737 | 163 | 89.5 | N,N-Bis(2-hydroxyethyl)glycine  |
| 186.0588 | 370.196 | 0.0467  | 186.1055 | 59  | 6.2  | Ser-His-Lys                     |
| 186.0588 | 370.196 | 0.0467  | 186.1055 | 48  | 4.3  | Ser-His-Lys                     |
| 118.0873 | 117.079 | -0.001  | 118.0863 | 410 | 40   | Betaine                         |
| 118.0873 | 117.079 | -0.001  | 118.0863 | 409 | 40   | Betaine                         |
| 118.0873 | 117.079 | -0.001  | 118.0863 | 406 | 40   | Betaine                         |
| 118.0873 | 117.079 | -0.001  | 118.0863 | 258 | 82.8 | Betaine                         |
| 118.0873 | 117.079 | -0.001  | 118.0863 | 257 | 82.8 | Betaine                         |
| 118.0873 | 117.079 | -0.001  | 118.0863 | 256 | 82.8 | Betaine                         |
| 118.0873 | 117.079 | -0.001  | 118.0863 | 398 | 52.8 | Betaine                         |
| 118.0873 | 117.079 | -0.001  | 118.0863 | 397 | 52.8 | Betaine                         |
| 118.0873 | 117.079 | -0.001  | 118.0863 | 395 | 52.8 | Betaine                         |
| 106.0872 | 105     | 0       | 106.09   | 151 | 74.3 | Diethanolamine                  |

|          |         |         |          |     |      |                                       |
|----------|---------|---------|----------|-----|------|---------------------------------------|
| 106.0872 | 105.079 | -0.0009 | 106.0863 | 118 | 19.4 | Diethanolamine                        |
| 106.0872 | 105.079 | -0.0009 | 106.0863 | 117 | 19.4 | Diethanolamine                        |
| 106.0872 | 105.079 | -0.0009 | 106.0863 | 195 | 100  | Diethanolamine                        |
| 106.0872 | 105.079 | -0.0009 | 106.0863 | 195 | 100  | Diethanolamine                        |
| 106.0872 | 105.079 | -0.0009 | 106.0863 | 193 | 100  | Diethanolamine                        |
| 186.0588 | 370.196 | 0.0467  | 186.1055 | 36  | 100  | Ser-His-Lys                           |
| 186.0588 | 370.196 | 0.0467  | 186.1055 | 52  | 100  | Ser-His-Lys                           |
| 186.0588 | 370.196 | 0.0467  | 186.1055 | 70  | 100  | Ser-His-Lys                           |
| 97.0774  | 114.104 | 0.0238  | 97.1012  | 8   | 100  | Cyclopentanemethanol, .alpha.-methyl- |
| 118.0873 | 117.079 | -0.001  | 118.0863 | 354 | 66.2 | Betaine                               |
| 118.0873 | 117.079 | -0.001  | 118.0863 | 350 | 66.2 | Betaine                               |
| 118.0873 | 117.079 | -0.001  | 118.0863 | 349 | 66.2 | Betaine                               |
| 118.0873 | 117.079 | -0.001  | 118.0863 | 331 | 96.8 | Betaine                               |
| 118.0873 | 117.079 | -0.001  | 118.0863 | 330 | 96.8 | Betaine                               |
| 118.0873 | 117.079 | -0.001  | 118.0863 | 319 | 96.8 | Betaine                               |
| 118.0873 | 117.079 | -0.001  | 118.0863 | 376 | 33.3 | Betaine                               |
| 118.0873 | 117.079 | -0.001  | 118.0863 | 374 | 33.3 | Betaine                               |
| 118.0873 | 117.079 | -0.001  | 118.0863 | 370 | 33.3 | Betaine                               |
| 106.0872 | 105     | 0       | 106.09   | 176 | 74.7 | Diethanolamine                        |
| 106.0872 | 105.079 | -0.0009 | 106.0863 | 144 | 19.9 | Diethanolamine                        |
| 106.0872 | 105.079 | -0.0009 | 106.0863 | 143 | 19.9 | Diethanolamine                        |
| 106.0872 | 105     | 0       | 106.09   | 159 | 79.6 | Diethanolamine                        |
| 106.0872 | 105.079 | -0.0009 | 106.0863 | 125 | 20.4 | Diethanolamine                        |
| 106.0872 | 105.079 | -0.0009 | 106.0863 | 124 | 20.4 | Diethanolamine                        |
| 106.0872 | 105.079 | -0.0009 | 106.0863 | 166 | 100  | Diethanolamine                        |
| 106.0872 | 105.079 | -0.0009 | 106.0863 | 165 | 100  | Diethanolamine                        |
| 106.0872 | 105.079 | -0.0009 | 106.0863 | 164 | 100  | Diethanolamine                        |
| 84.0822  | 102.092 | -0.0014 | 84.0808  | 299 | 50   | Betaine aldehyde cation               |
| 84.0822  | 102.092 | -0.0014 | 84.0808  | 299 | 50   | Betaine aldehyde cation               |
| 84.0822  | 102.092 | -0.0014 | 84.0808  | 279 | 50   | Betaine aldehyde cation               |
| 84.0822  | 102.092 | -0.0014 | 84.0808  | 279 | 50   | Betaine aldehyde cation               |
| 84.0822  | 102.092 | -0.0014 | 84.0808  | 206 | 56.6 | Betaine aldehyde cation               |
| 84.0822  | 102.092 | -0.0014 | 84.0808  | 199 | 43.4 | Betaine aldehyde cation               |
| 186.0588 | 370.196 | 0.0467  | 186.1055 | 55  | 100  | Ser-His-Lys                           |
| 186.0588 | 163.084 | 0.0149  | 186.0737 | 144 | 100  | N,N-Bis(2-hydroxyethyl)glycine        |
| 148.0974 | 147     | -0.04   | 148.06   | 34  | 100  | O-acetyl-L-serine hydrochloride       |
| 148.0974 | 147     | -0.04   | 148.06   | 63  | 59.3 | O-acetyl-L-serine hydrochloride       |
| 148.0974 | 147     | -0.04   | 148.06   | 52  | 40.7 | O-acetyl-L-serine hydrochloride       |
| 148.0974 | 147.053 | -0.037  | 148.0604 | 136 | 100  | O-Acetyl-L-serine                     |
| 148.0974 | 147.053 | -0.037  | 148.0604 | 128 | 100  | O-Acetyl-L-serine                     |
| 97.0774  | 114.104 | 0.0238  | 97.1012  | 36  | 24.5 | Cyclohexanemethanol                   |
| 97.0774  | 114.104 | 0.0238  | 97.1012  | 34  | 24.5 | Cyclohexanemethanol                   |
| 97.0774  | 114.104 | 0.0238  | 97.1012  | 33  | 21.6 | Cyclohexanol, 4-methyl-, trans-       |
| 106.0872 | 105     | 0       | 106.09   | 155 | 77.6 | Diethanolamine                        |
| 106.0872 | 105.079 | -0.0009 | 106.0863 | 127 | 22.4 | Diethanolamine                        |
| 106.0872 | 105.079 | -0.0009 | 106.0863 | 126 | 22.4 | Diethanolamine                        |

|          |         |         |          |     |      |                                          |
|----------|---------|---------|----------|-----|------|------------------------------------------|
| 84.0822  | 102.092 | -0.0014 | 84.0808  | 276 | 50   | Betaine aldehyde cation                  |
| 84.0822  | 102.092 | -0.0014 | 84.0808  | 276 | 50   | Betaine aldehyde cation                  |
| 84.0822  | 102.092 | -0.0014 | 84.0808  | 238 | 52   | Betaine aldehyde cation                  |
| 84.0822  | 102.092 | -0.0014 | 84.0808  | 236 | 48   | Betaine aldehyde cation                  |
| 84.0822  | 102.092 | -0.0014 | 84.0808  | 184 | 53.1 | Betaine aldehyde cation                  |
| 84.0822  | 102.092 | -0.0014 | 84.0808  | 181 | 46.9 | Betaine aldehyde cation                  |
| 148.0974 | 147     | -0.04   | 148.06   | 37  | 100  | O-acetyl-L-serine hydrochloride          |
| 822.7532 | 822     | 0       | 822.75   | 332 | 82.7 | TG 48:1; [M+NH4]+;<br>TG(16:0/16:0/16:1) |
| 822.7532 | 822     | 0       | 822.75   | 285 | 17.3 | TG 48:1; [M+NH4]+;<br>TG(14:0/16:0/18:1) |
| 822.7532 | 822     | 0       | 822.75   | 342 | 80.6 | TG 48:1; [M+NH4]+;<br>TG(16:0/16:0/16:1) |
| 822.7532 | 822     | 0       | 822.75   | 297 | 17.2 | TG 48:1; [M+NH4]+;<br>TG(14:0/16:0/18:1) |
| 822.7532 | 822     | 0       | 822.75   | 222 | 2.2  | TG 48:1; [M+NH4]+;<br>TG(14:0/16:1/18:0) |
| 822.7532 | 822     | 0       | 822.75   | 280 | 56   | TG 48:1; [M+NH4]+;<br>TG(16:0/16:0/16:1) |
| 822.7532 | 822     | 0       | 822.75   | 274 | 44   | TG 48:1; [M+NH4]+;<br>TG(14:0/16:0/18:1) |
| 822.7532 | 822     | 0       | 822.75   | 277 | 100  | TG 48:1; [M+NH4]+;<br>TG(16:0/16:0/16:1) |
| 97.0774  | 114.104 | 0.0238  | 97.1012  | 30  | 32.3 | Cyclohexanol, 1-methyl-                  |
| 97.0774  | 114.104 | 0.0238  | 97.1012  | 22  | 24.1 | Cycloheptanol                            |
| 97.0774  | 114.104 | 0.0238  | 97.1012  | 20  | 22.2 | Cyclohexanol, 2-methyl-, trans-          |
| 118.0873 | 117.079 | -0.001  | 118.0863 | 238 | 100  | Betaine                                  |
| 118.0873 | 117.079 | -0.001  | 118.0863 | 233 | 100  | Betaine                                  |
| 118.0873 | 117.079 | -0.001  | 118.0863 | 411 | 33.9 | Betaine                                  |
| 118.0873 | 117.079 | -0.001  | 118.0863 | 411 | 33.9 | Betaine                                  |
| 118.0873 | 117.079 | -0.001  | 118.0863 | 408 | 33.9 | Betaine                                  |
| 118.0873 | 117.079 | -0.001  | 118.0863 | 270 | 60.3 | Betaine                                  |
| 118.0873 | 117.079 | -0.001  | 118.0863 | 268 | 60.3 | Betaine                                  |
| 118.0873 | 117.079 | -0.001  | 118.0863 | 263 | 60.3 | Betaine                                  |
| 118.0873 | 117.079 | -0.001  | 118.0863 | 335 | 48.5 | Betaine                                  |
| 118.0873 | 117.079 | -0.001  | 118.0863 | 333 | 48.5 | Betaine                                  |
| 118.0873 | 117.079 | -0.001  | 118.0863 | 331 | 48.5 | Betaine                                  |
| 106.0872 | 105     | 0       | 106.09   | 156 | 73.7 | Diethanolamine                           |
| 106.0872 | 105.079 | -0.0009 | 106.0863 | 124 | 19.7 | Diethanolamine                           |
| 106.0872 | 105.079 | -0.0009 | 106.0863 | 123 | 19.7 | Diethanolamine                           |
| 106.0872 | 105     | 0       | 106.09   | 158 | 80.2 | Diethanolamine                           |
| 106.0872 | 105.079 | -0.0009 | 106.0863 | 122 | 19.8 | Diethanolamine                           |
| 106.0872 | 105.079 | -0.0009 | 106.0863 | 122 | 19.8 | Diethanolamine                           |
| 106.0872 | 105     | 0       | 106.09   | 245 | 73.2 | Diethanolamine                           |
| 106.0872 | 105.079 | -0.0009 | 106.0863 | 222 | 26.8 | Diethanolamine                           |
| 106.0872 | 105.079 | -0.0009 | 106.0863 | 220 | 26.8 | Diethanolamine                           |
| 84.0822  | 102.092 | -0.0014 | 84.0808  | 288 | 54.2 | Betaine aldehyde cation                  |

|          |         |         |          |     |      |                                |
|----------|---------|---------|----------|-----|------|--------------------------------|
| 84.0822  | 102.092 | -0.0014 | 84.0808  | 284 | 45.8 | Betaine aldehyde cation        |
| 84.0822  | 102.092 | -0.0014 | 84.0808  | 261 | 54.2 | Betaine aldehyde cation        |
| 84.0822  | 102.092 | -0.0014 | 84.0808  | 257 | 45.8 | Betaine aldehyde cation        |
| 84.0822  | 102.092 | -0.0014 | 84.0808  | 140 | 53.1 | Betaine aldehyde cation        |
| 84.0822  | 102.092 | -0.0014 | 84.0808  | 137 | 46.9 | Betaine aldehyde cation        |
| 186.0588 | 163.084 | 0.0149  | 186.0737 | 118 | 87.8 | N,N-Bis(2-hydroxyethyl)glycine |
| 186.0588 | 163.084 | 0.0149  | 186.0737 | 82  | 87.8 | N,N-Bis(2-hydroxyethyl)glycine |
| 186.0588 | 203.091 | 0.0285  | 186.0873 | 46  | 12.2 | Ala-Asn                        |
| 186.0588 | 163.084 | 0.0149  | 186.0737 | 141 | 100  | N,N-Bis(2-hydroxyethyl)glycine |
| 97.0774  | 114.104 | 0.0238  | 97.1012  | 51  | 24   | Cyclohexanol, 1-methyl-        |
| 97.0774  | 114.104 | 0.0238  | 97.1012  | 41  | 16.9 | Cycloheptanol                  |
| 97.0774  | 114.104 | 0.0238  | 97.1012  | 40  | 16.3 | Cyclohexanemethanol            |
| 118.0873 | 117.079 | -0.001  | 118.0863 | 260 | 79.5 | Betaine                        |
| 118.0873 | 117.079 | -0.001  | 118.0863 | 253 | 79.5 | Betaine                        |
| 118.0873 | 117.079 | -0.001  | 118.0863 | 253 | 79.5 | Betaine                        |
| 118.0873 | 117.079 | -0.001  | 118.0863 | 351 | 32.3 | Betaine                        |
| 118.0873 | 117.079 | -0.001  | 118.0863 | 350 | 32.3 | Betaine                        |
| 118.0873 | 117.079 | -0.001  | 118.0863 | 349 | 32.3 | Betaine                        |
| 118.0873 | 117.079 | -0.001  | 118.0863 | 266 | 80.8 | Betaine                        |
| 118.0873 | 117.079 | -0.001  | 118.0863 | 263 | 80.8 | Betaine                        |
| 118.0873 | 117.079 | -0.001  | 118.0863 | 262 | 80.8 | Betaine                        |
| 118.0873 | 117     | 0       | 118.09   | 358 | 24.3 | Betaine                        |
| 118.0873 | 117     | 0       | 118.09   | 356 | 22.4 | Betaine                        |
| 118.0873 | 117.079 | -0.001  | 118.0863 | 355 | 21.5 | Betaine                        |
| 106.0872 | 105     | 0       | 106.09   | 133 | 78.2 | Diethanolamine                 |
| 106.0872 | 105.079 | -0.0009 | 106.0863 | 103 | 21.8 | Diethanolamine                 |
| 106.0872 | 105.079 | -0.0009 | 106.0863 | 103 | 21.8 | Diethanolamine                 |
| 106.0872 | 105     | 0       | 106.09   | 177 | 72.7 | Diethanolamine                 |
| 106.0872 | 105.079 | -0.0009 | 106.0863 | 149 | 21   | Diethanolamine                 |
| 106.0872 | 105.079 | -0.0009 | 106.0863 | 148 | 21   | Diethanolamine                 |
| 186.0588 | 163.084 | 0.0149  | 186.0737 | 172 | 83.3 | N,N-Bis(2-hydroxyethyl)glycine |
| 186.0588 | 203.091 | 0.0285  | 186.0873 | 111 | 14.5 | Ala-Asn                        |
| 186.0588 | 163.084 | 0.0149  | 186.0737 | 45  | 83.3 | N,N-Bis(2-hydroxyethyl)glycine |
| 186.0588 | 163.084 | 0.0149  | 186.0737 | 107 | 100  | N,N-Bis(2-hydroxyethyl)glycine |
| 186.0588 | 163.084 | 0.0149  | 186.0737 | 117 | 88.3 | N,N-Bis(2-hydroxyethyl)glycine |
| 186.0588 | 370.196 | 0.0467  | 186.1055 | 43  | 11.7 | Ser-His-Lys                    |
| 148.0974 | 147.053 | -0.037  | 148.0604 | 147 | 71   | O-Acetyl-L-serine              |
| 148.0974 | 147.053 | -0.037  | 148.0604 | 140 | 71   | O-Acetyl-L-serine              |
| 148.0974 | 147.053 | -0.037  | 148.0604 | 128 | 71   | O-Acetyl-L-serine              |
| 148.0974 | 147.053 | -0.037  | 148.0604 | 122 | 100  | O-Acetyl-L-serine              |
| 118.0873 | 117.079 | -0.001  | 118.0863 | 416 | 32.2 | Betaine                        |
| 118.0873 | 117.079 | -0.001  | 118.0863 | 414 | 32.2 | Betaine                        |
| 118.0873 | 117.079 | -0.001  | 118.0863 | 412 | 32.2 | Betaine                        |
| 118.0873 | 117.079 | -0.001  | 118.0863 | 270 | 27.8 | Betaine                        |
| 118.0873 | 117.079 | -0.001  | 118.0863 | 270 | 27.8 | Betaine                        |
| 118.0873 | 117.079 | -0.001  | 118.0863 | 268 | 27.8 | Betaine                        |
| 118.0873 | 117.079 | -0.001  | 118.0863 | 336 | 39.3 | Betaine                        |

|          |         |         |          |     |      |                                 |
|----------|---------|---------|----------|-----|------|---------------------------------|
| 118.0873 | 117.079 | -0.001  | 118.0863 | 332 | 39.3 | Betaine                         |
| 118.0873 | 117.079 | -0.001  | 118.0863 | 331 | 39.3 | Betaine                         |
| 106.0872 | 105     | 0       | 106.09   | 159 | 74   | Diethanolamine                  |
| 106.0872 | 105.079 | -0.0009 | 106.0863 | 128 | 20.2 | Diethanolamine                  |
| 106.0872 | 105.079 | -0.0009 | 106.0863 | 128 | 20.2 | Diethanolamine                  |
| 106.0872 | 105     | 0       | 106.09   | 155 | 79.3 | Diethanolamine                  |
| 106.0872 | 105.079 | -0.0009 | 106.0863 | 122 | 20.7 | Diethanolamine                  |
| 106.0872 | 105.079 | -0.0009 | 106.0863 | 121 | 20.7 | Diethanolamine                  |
| 84.0822  | 102.092 | -0.0014 | 84.0808  | 303 | 53.1 | Betaine aldehyde cation         |
| 84.0822  | 102.092 | -0.0014 | 84.0808  | 300 | 46.9 | Betaine aldehyde cation         |
| 84.0822  | 102.092 | -0.0014 | 84.0808  | 267 | 55.4 | Betaine aldehyde cation         |
| 84.0822  | 102.092 | -0.0014 | 84.0808  | 262 | 44.6 | Betaine aldehyde cation         |
| 84.0822  | 102.092 | -0.0014 | 84.0808  | 150 | 52   | Betaine aldehyde cation         |
| 84.0822  | 102.092 | -0.0014 | 84.0808  | 148 | 48   | Betaine aldehyde cation         |
| 186.0588 | 163.084 | 0.0149  | 186.0737 | 140 | 90.4 | N,N-Bis(2-hydroxyethyl)glycine  |
| 186.0588 | 370.196 | 0.0467  | 186.1055 | 59  | 9.6  | Ser-His-Lys                     |
| 106.0872 | 105     | 0       | 106.09   | 161 | 77.9 | Diethanolamine                  |
| 106.0872 | 105.079 | -0.0009 | 106.0863 | 132 | 22.1 | Diethanolamine                  |
| 106.0872 | 105.079 | -0.0009 | 106.0863 | 132 | 22.1 | Diethanolamine                  |
| 84.0822  | 102.092 | -0.0014 | 84.0808  | 274 | 51   | Betaine aldehyde cation         |
| 84.0822  | 102.092 | -0.0014 | 84.0808  | 273 | 49   | Betaine aldehyde cation         |
| 84.0822  | 102.092 | -0.0014 | 84.0808  | 216 | 52   | Betaine aldehyde cation         |
| 84.0822  | 102.092 | -0.0014 | 84.0808  | 214 | 48   | Betaine aldehyde cation         |
| 84.0822  | 102.092 | -0.0014 | 84.0808  | 148 | 54.2 | Betaine aldehyde cation         |
| 84.0822  | 102.092 | -0.0014 | 84.0808  | 144 | 45.8 | Betaine aldehyde cation         |
| 148.0974 | 147.053 | -0.037  | 148.0604 | 20  | 37.1 | O-Acetyl-L-serine               |
| 148.0974 | 147.053 | -0.037  | 148.0604 | 20  | 37.1 | O-Acetyl-L-serine               |
| 148.0974 | 147     | -0.04   | 148.06   | 19  | 35.6 | N-acetyl-DL-serine              |
| 148.0974 | 147.053 | -0.037  | 148.0604 | 123 | 70.2 | O-Acetyl-L-serine               |
| 148.0974 | 147.053 | -0.037  | 148.0604 | 116 | 70.2 | O-Acetyl-L-serine               |
| 148.0974 | 147.053 | -0.037  | 148.0604 | 104 | 70.2 | O-Acetyl-L-serine               |
| 97.0774  | 114.104 | 0.0238  | 97.1012  | 41  | 100  | Cyclohexanol, 4-methyl-, trans- |
| 118.0873 | 117.079 | -0.001  | 118.0863 | 335 | 68.9 | Betaine                         |
| 118.0873 | 117.079 | -0.001  | 118.0863 | 333 | 68.9 | Betaine                         |
| 118.0873 | 117.079 | -0.001  | 118.0863 | 326 | 68.9 | Betaine                         |
| 118.0873 | 117.079 | -0.001  | 118.0863 | 431 | 57.5 | Betaine                         |
| 118.0873 | 117.079 | -0.001  | 118.0863 | 424 | 57.5 | Betaine                         |
| 118.0873 | 117.079 | -0.001  | 118.0863 | 421 | 57.5 | Betaine                         |
| 118.0873 | 117.079 | -0.001  | 118.0863 | 300 | 43.9 | Betaine                         |
| 118.0873 | 117.079 | -0.001  | 118.0863 | 299 | 43.9 | Betaine                         |
| 118.0873 | 117.079 | -0.001  | 118.0863 | 296 | 43.9 | Betaine                         |
| 118.0873 | 117     | 0       | 118.09   | 323 | 28.9 | Betaine                         |
| 118.0873 | 117.079 | -0.001  | 118.0863 | 313 | 20.4 | Betaine                         |
| 118.0873 | 117.079 | -0.001  | 118.0863 | 313 | 20.4 | Betaine                         |
| 106.0872 | 105     | 0       | 106.09   | 158 | 76.3 | Diethanolamine                  |
| 106.0872 | 105.079 | -0.0009 | 106.0863 | 121 | 18.6 | Diethanolamine                  |
| 106.0872 | 105.079 | -0.0009 | 106.0863 | 120 | 18.6 | Diethanolamine                  |

|          |         |         |          |     |      |                                           |
|----------|---------|---------|----------|-----|------|-------------------------------------------|
| 106.0872 | 105     | 0       | 106.09   | 159 | 79.6 | Diethanolamine                            |
| 106.0872 | 105.079 | -0.0009 | 106.0863 | 125 | 20.4 | Diethanolamine                            |
| 106.0872 | 105.079 | -0.0009 | 106.0863 | 124 | 20.4 | Diethanolamine                            |
| 106.0872 | 105     | 0       | 106.09   | 218 | 52.8 | Diethanolamine                            |
| 106.0872 | 105.079 | -0.0009 | 106.0863 | 198 | 24   | Diethanolamine                            |
| 106.0872 | 105.079 | -0.0009 | 106.0863 | 197 | 24   | Diethanolamine                            |
| 106.0872 | 105     | 0       | 106.09   | 159 | 76.8 | Diethanolamine                            |
| 106.0872 | 105.079 | -0.0009 | 106.0863 | 119 | 17.8 | Diethanolamine                            |
| 106.0872 | 105.079 | -0.0009 | 106.0863 | 119 | 17.8 | Diethanolamine                            |
| 84.0822  | 102.092 | -0.0014 | 84.0808  | 306 | 52   | Betaine aldehyde cation                   |
| 84.0822  | 102.092 | -0.0014 | 84.0808  | 304 | 48   | Betaine aldehyde cation                   |
| 84.0822  | 102.092 | -0.0014 | 84.0808  | 244 | 55.4 | Betaine aldehyde cation                   |
| 84.0822  | 102.092 | -0.0014 | 84.0808  | 239 | 44.6 | Betaine aldehyde cation                   |
| 84.0822  | 102.092 | -0.0014 | 84.0808  | 182 | 51   | Betaine aldehyde cation                   |
| 84.0822  | 102.092 | -0.0014 | 84.0808  | 181 | 49   | Betaine aldehyde cation                   |
| 186.0588 | 163.084 | 0.0149  | 186.0737 | 117 | 83   | N,N-Bis(2-hydroxyethyl)glycine            |
| 186.0588 | 163.084 | 0.0149  | 186.0737 | 94  | 83   | N,N-Bis(2-hydroxyethyl)glycine            |
| 186.0588 | 203.091 | 0.0285  | 186.0873 | 68  | 17   | Ala-Asn                                   |
| 186.0588 | 163.084 | 0.0149  | 186.0737 | 136 | 100  | N,N-Bis(2-hydroxyethyl)glycine            |
| 118.0873 | 117.079 | -0.001  | 118.0863 | 229 | 80.1 | Betaine                                   |
| 118.0873 | 117.079 | -0.001  | 118.0863 | 222 | 80.1 | Betaine                                   |
| 118.0873 | 117.079 | -0.001  | 118.0863 | 216 | 80.1 | Betaine                                   |
| 118.0873 | 117.079 | -0.001  | 118.0863 | 308 | 24.9 | Betaine                                   |
| 118.0873 | 117     | 0       | 118.09   | 308 | 24.9 | Betaine                                   |
| 118.0873 | 117.079 | -0.001  | 118.0863 | 306 | 24.9 | Betaine                                   |
| 118.0873 | 117.079 | -0.001  | 118.0863 | 262 | 48.9 | Betaine                                   |
| 118.0873 | 117.079 | -0.001  | 118.0863 | 261 | 48.9 | Betaine                                   |
| 118.0873 | 117.079 | -0.001  | 118.0863 | 258 | 48.9 | Betaine                                   |
| 118.0873 | 117.079 | -0.001  | 118.0863 | 346 | 24.6 | Betaine                                   |
| 118.0873 | 117.079 | -0.001  | 118.0863 | 346 | 24.6 | Betaine                                   |
| 118.0873 | 117.079 | -0.001  | 118.0863 | 345 | 24.6 | Betaine                                   |
| 148.0974 | 147.053 | -0.037  | 148.0604 | 155 | 63.5 | O-Acetyl-L-serine                         |
| 148.0974 | 147.053 | -0.037  | 148.0604 | 146 | 63.5 | O-Acetyl-L-serine                         |
| 148.0974 | 147     | -0.04   | 148.06   | 139 | 36.5 | O-acetyl-L-serine hydrochloride           |
| 148.0974 | 147.053 | -0.037  | 148.0604 | 124 | 100  | O-Acetyl-L-serine                         |
| 371.2885 | 370.308 | 0.0271  | 371.3156 | 198 | 100  | Hexanedioic acid, bis(2-ethylhexyl) ester |
| 371.2885 | 370.308 | 0.0271  | 371.3156 | 126 | 100  | Hexanedioic acid, bis(2-ethylhexyl) ester |
| 371.2885 | 370.308 | 0.0271  | 371.3156 | 118 | 100  | Hexanedioic acid, bis(2-ethylhexyl) ester |
| 371.2885 | 370.308 | 0.0271  | 371.3156 | 165 | 88.8 | Hexanedioic acid, bis(2-ethylhexyl) ester |
| 371.2885 | 370.308 | 0.0271  | 371.3156 | 154 | 88.8 | Hexanedioic acid, bis(2-ethylhexyl) ester |
| 371.2885 | 370.308 | 0.0271  | 371.3156 | 120 | 88.8 | Hexanedioic acid, bis(2-ethylhexyl) ester |

|          |         |         |          |     |      |                                           |
|----------|---------|---------|----------|-----|------|-------------------------------------------|
| 371.2885 | 370.308 | 0.0271  | 371.3156 | 144 | 81.9 | Hexanedioic acid, bis(2-ethylhexyl) ester |
| 371.2885 | 370.308 | 0.0271  | 371.3156 | 120 | 81.9 | Hexanedioic acid, bis(2-ethylhexyl) ester |
| 371.2885 | 370.308 | 0.0271  | 371.3156 | 70  | 81.9 | Hexanedioic acid, bis(2-ethylhexyl) ester |
| 118.0873 | 117.079 | -0.001  | 118.0863 | 252 | 49.9 | Betaine                                   |
| 118.0873 | 117.079 | -0.001  | 118.0863 | 252 | 49.9 | Betaine                                   |
| 118.0873 | 117.079 | -0.001  | 118.0863 | 249 | 49.9 | Betaine                                   |
| 118.0873 | 117.079 | -0.001  | 118.0863 | 313 | 30.9 | Betaine                                   |
| 118.0873 | 117.079 | -0.001  | 118.0863 | 310 | 30.9 | Betaine                                   |
| 118.0873 | 117.079 | -0.001  | 118.0863 | 310 | 30.9 | Betaine                                   |
| 106.0872 | 105     | 0       | 106.09   | 154 | 75.9 | Diethanolamine                            |
| 106.0872 | 105.079 | -0.0009 | 106.0863 | 117 | 18.5 | Diethanolamine                            |
| 106.0872 | 105.079 | -0.0009 | 106.0863 | 116 | 18.5 | Diethanolamine                            |
| 106.0872 | 105     | 0       | 106.09   | 224 | 80.4 | Diethanolamine                            |
| 106.0872 | 105.079 | -0.0009 | 106.0863 | 187 | 19.6 | Diethanolamine                            |
| 106.0872 | 105.079 | -0.0009 | 106.0863 | 186 | 19.6 | Diethanolamine                            |
| 84.0822  | 102.092 | -0.0014 | 84.0808  | 298 | 53.1 | Betaine aldehyde cation                   |
| 84.0822  | 102.092 | -0.0014 | 84.0808  | 295 | 46.9 | Betaine aldehyde cation                   |
| 84.0822  | 102.092 | -0.0014 | 84.0808  | 223 | 50   | Betaine aldehyde cation                   |
| 84.0822  | 102.092 | -0.0014 | 84.0808  | 223 | 50   | Betaine aldehyde cation                   |
| 84.0822  | 102.092 | -0.0014 | 84.0808  | 159 | 55.4 | Betaine aldehyde cation                   |
| 84.0822  | 102.092 | -0.0014 | 84.0808  | 154 | 44.6 | Betaine aldehyde cation                   |
| 84.0822  | 102.092 | -0.0014 | 84.0808  | 183 | 54.2 | Betaine aldehyde cation                   |
| 84.0822  | 102.092 | -0.0014 | 84.0808  | 179 | 45.8 | Betaine aldehyde cation                   |
| 186.0588 | 163.084 | 0.0149  | 186.0737 | 137 | 100  | N,N-Bis(2-hydroxyethyl)glycine            |
| 186.0588 | 370.196 | 0.0467  | 186.1055 | 56  | 100  | Ser-His-Lys                               |
| 170.0793 | 187.121 | 0.0383  | 170.1176 | 89  | 54.2 | 7-Keto-8-aminopelargonic acid             |
| 170.0793 | 187.121 | 0.0383  | 170.1176 | 85  | 45.8 | 7-Keto-8-aminopelargonic acid             |
| 148.0974 | 147     | -0.04   | 148.06   | 26  | 33.9 | O-acetyl-L-serine hydrochloride           |
| 148.0974 | 147     | -0.04   | 148.06   | 24  | 31.2 | O-acetyl-L-serine hydrochloride           |
| 148.0974 | 147.053 | -0.037  | 148.0604 | 9   | 18.9 | O-Acetyl-L-serine                         |
| 148.0974 | 147     | -0.04   | 148.06   | 3   | 100  | O-acetyl-L-serine hydrochloride           |
| 106.0872 | 105     | 0       | 106.09   | 171 | 75.1 | Diethanolamine                            |
| 106.0872 | 105.079 | -0.0009 | 106.0863 | 136 | 18.8 | Diethanolamine                            |
| 106.0872 | 105.079 | -0.0009 | 106.0863 | 136 | 18.8 | Diethanolamine                            |
| 106.0872 | 105     | 0       | 106.09   | 245 | 61.9 | Diethanolamine                            |
| 106.0872 | 105.079 | -0.0009 | 106.0863 | 230 | 37.5 | Diethanolamine                            |
| 106.0872 | 105.079 | -0.0009 | 106.0863 | 229 | 37.5 | Diethanolamine                            |
| 106.0872 | 105.079 | -0.0009 | 106.0863 | 109 | 100  | Diethanolamine                            |
| 106.0872 | 105.079 | -0.0009 | 106.0863 | 103 | 100  | Diethanolamine                            |
| 84.0822  | 102.092 | -0.0014 | 84.0808  | 272 | 52   | Betaine aldehyde cation                   |
| 84.0822  | 102.092 | -0.0014 | 84.0808  | 270 | 48   | Betaine aldehyde cation                   |
| 84.0822  | 102.092 | -0.0014 | 84.0808  | 214 | 52   | Betaine aldehyde cation                   |
| 84.0822  | 102.092 | -0.0014 | 84.0808  | 212 | 48   | Betaine aldehyde cation                   |
| 84.0822  | 102.092 | -0.0014 | 84.0808  | 124 | 54.2 | Betaine aldehyde cation                   |



|          |         |         |          |     |      |                                                       |
|----------|---------|---------|----------|-----|------|-------------------------------------------------------|
| 84.0822  | 102.092 | -0.0014 | 84.0808  | 120 | 45.8 | Betaine aldehyde cation                               |
| 824.7703 | 824     | 0       | 824.77   | 250 | 73.2 | TG 48:0; [M+NH4] <sup>+</sup> ;<br>TG(14:0/16:0/18:0) |
| 824.7703 | 824     | 0       | 824.77   | 227 | 26.8 | TG 48:0; [M+NH4] <sup>+</sup> ;<br>TG(16:0/16:0/16:0) |
| 824.7703 | 824     | 0       | 824.77   | 260 | 50   | TG 48:0; [M+NH4] <sup>+</sup> ;<br>TG(14:0/16:0/18:0) |
| 824.7703 | 824     | 0       | 824.77   | 260 | 50   | TG 48:0; [M+NH4] <sup>+</sup> ;<br>TG(16:0/16:0/16:0) |
| 824.7703 | 824     | 0       | 824.77   | 235 | 74.9 | TG 48:0; [M+NH4] <sup>+</sup> ;<br>TG(16:0/16:0/16:0) |
| 824.7703 | 824     | 0       | 824.77   | 211 | 25.1 | TG 48:0; [M+NH4] <sup>+</sup> ;<br>TG(14:0/16:0/18:0) |
| 824.7703 | 824     | 0       | 824.77   | 262 | 52   | TG 48:0; [M+NH4] <sup>+</sup> ;<br>TG(16:0/16:0/16:0) |
| 824.7703 | 824     | 0       | 824.77   | 260 | 48   | TG 48:0; [M+NH4] <sup>+</sup> ;<br>TG(14:0/16:0/18:0) |
| 118.0873 | 117.079 | -0.001  | 118.0863 | 332 | 41.8 | Betaine                                               |
| 118.0873 | 117.079 | -0.001  | 118.0863 | 332 | 41.8 | Betaine                                               |
| 118.0873 | 117.079 | -0.001  | 118.0863 | 327 | 41.8 | Betaine                                               |
| 118.0873 | 117.079 | -0.001  | 118.0863 | 387 | 28.1 | Betaine                                               |
| 118.0873 | 117.079 | -0.001  | 118.0863 | 384 | 28.1 | Betaine                                               |
| 118.0873 | 117.079 | -0.001  | 118.0863 | 384 | 28.1 | Betaine                                               |
| 118.0873 | 117.079 | -0.001  | 118.0863 | 250 | 56   | Betaine                                               |
| 118.0873 | 117.079 | -0.001  | 118.0863 | 250 | 56   | Betaine                                               |
| 118.0873 | 117.079 | -0.001  | 118.0863 | 247 | 56   | Betaine                                               |
| 118.0873 | 117.079 | -0.001  | 118.0863 | 305 | 34.3 | Betaine                                               |
| 118.0873 | 117.079 | -0.001  | 118.0863 | 305 | 34.3 | Betaine                                               |
| 118.0873 | 117.079 | -0.001  | 118.0863 | 302 | 34.3 | Betaine                                               |
| 106.0872 | 105     | 0       | 106.09   | 159 | 80.2 | Diethanolamine                                        |
| 106.0872 | 105.079 | -0.0009 | 106.0863 | 123 | 19.8 | Diethanolamine                                        |
| 106.0872 | 105.079 | -0.0009 | 106.0863 | 123 | 19.8 | Diethanolamine                                        |
| 106.0872 | 105     | 0       | 106.09   | 147 | 72.9 | Diethanolamine                                        |
| 106.0872 | 105.079 | -0.0009 | 106.0863 | 117 | 20.3 | Diethanolamine                                        |
| 106.0872 | 105.079 | -0.0009 | 106.0863 | 117 | 20.3 | Diethanolamine                                        |
| 106.0872 | 105     | 0       | 106.09   | 151 | 77.6 | Diethanolamine                                        |
| 106.0872 | 105.079 | -0.0009 | 106.0863 | 123 | 22.4 | Diethanolamine                                        |
| 106.0872 | 105.079 | -0.0009 | 106.0863 | 123 | 22.4 | Diethanolamine                                        |
| 84.0822  | 102.092 | -0.0014 | 84.0808  | 282 | 52   | Betaine aldehyde cation                               |
| 84.0822  | 102.092 | -0.0014 | 84.0808  | 280 | 48   | Betaine aldehyde cation                               |
| 84.0822  | 102.092 | -0.0014 | 84.0808  | 277 | 50   | Betaine aldehyde cation                               |
| 84.0822  | 102.092 | -0.0014 | 84.0808  | 277 | 50   | Betaine aldehyde cation                               |
| 84.0822  | 102.092 | -0.0014 | 84.0808  | 220 | 51   | Betaine aldehyde cation                               |
| 84.0822  | 102.092 | -0.0014 | 84.0808  | 219 | 49   | Betaine aldehyde cation                               |
| 186.0588 | 163.084 | 0.0149  | 186.0737 | 139 | 100  | N,N-Bis(2-hydroxyethyl)glycine                        |
| 186.0588 | 163.084 | 0.0149  | 186.0737 | 97  | 100  | N,N-Bis(2-hydroxyethyl)glycine                        |
| 186.0588 | 370.196 | 0.0467  | 186.1055 | 68  | 100  | Ser-His-Lys                                           |

|          |         |         |          |     |      |                                                       |
|----------|---------|---------|----------|-----|------|-------------------------------------------------------|
| 186.0588 | 163.084 | 0.0149  | 186.0737 | 142 | 91.7 | N,N-Bis(2-hydroxyethyl)glycine                        |
| 186.0588 | 370.196 | 0.0467  | 186.1055 | 57  | 8.3  | Ser-His-Lys                                           |
| 824.7703 | 824     | 0       | 824.77   | 311 | 85.4 | TG 48:0; [M+NH4] <sup>+</sup> ;<br>TG(14:0/16:0/18:0) |
| 824.7703 | 824     | 0       | 824.77   | 249 | 14.6 | TG 48:0; [M+NH4] <sup>+</sup> ;<br>TG(16:0/16:0/16:0) |
| 824.7703 | 824     | 0       | 824.77   | 98  | 100  | TG 48:0; [M+NH4] <sup>+</sup> ;<br>TG(14:0/16:0/18:0) |
| 97.0774  | 114.104 | 0.0238  | 97.1012  | 65  | 25.2 | Cyclohexanol, 4-methyl-, trans-                       |
| 97.0774  | 114.104 | 0.0238  | 97.1012  | 58  | 19.3 | Cyclohexanol, 2-methyl-, trans-                       |
| 97.0774  | 114.104 | 0.0238  | 97.1012  | 56  | 19.3 | Cyclohexanol, 2-methyl-, trans-                       |
| 118.0873 | 117.079 | -0.001  | 118.0863 | 277 | 100  | Betaine                                               |
| 118.0873 | 117.079 | -0.001  | 118.0863 | 275 | 100  | Betaine                                               |
| 118.0873 | 117.079 | -0.001  | 118.0863 | 274 | 100  | Betaine                                               |
| 118.0873 | 117.079 | -0.001  | 118.0863 | 398 | 62.9 | Betaine                                               |
| 118.0873 | 117.079 | -0.001  | 118.0863 | 393 | 62.9 | Betaine                                               |
| 118.0873 | 117.079 | -0.001  | 118.0863 | 390 | 62.9 | Betaine                                               |
| 118.0873 | 117.079 | -0.001  | 118.0863 | 302 | 72.8 | Betaine                                               |
| 118.0873 | 117.079 | -0.001  | 118.0863 | 296 | 72.8 | Betaine                                               |
| 118.0873 | 117.079 | -0.001  | 118.0863 | 283 | 72.8 | Betaine                                               |
| 118.0873 | 117.079 | -0.001  | 118.0863 | 371 | 53.1 | Betaine                                               |
| 118.0873 | 117.079 | -0.001  | 118.0863 | 370 | 53.1 | Betaine                                               |
| 118.0873 | 117.079 | -0.001  | 118.0863 | 366 | 53.1 | Betaine                                               |
| 106.0872 | 105     | 0       | 106.09   | 160 | 75.2 | Diethanolamine                                        |
| 106.0872 | 105.079 | -0.0009 | 106.0863 | 122 | 18   | Diethanolamine                                        |
| 106.0872 | 105.079 | -0.0009 | 106.0863 | 121 | 18   | Diethanolamine                                        |
| 106.0872 | 105     | 0       | 106.09   | 156 | 74.4 | Diethanolamine                                        |
| 106.0872 | 105.079 | -0.0009 | 106.0863 | 122 | 19.1 | Diethanolamine                                        |
| 106.0872 | 105.079 | -0.0009 | 106.0863 | 121 | 19.1 | Diethanolamine                                        |
| 106.0872 | 105     | 0       | 106.09   | 170 | 80.7 | Diethanolamine                                        |
| 106.0872 | 105.079 | -0.0009 | 106.0863 | 132 | 19.3 | Diethanolamine                                        |
| 106.0872 | 105.079 | -0.0009 | 106.0863 | 130 | 19.3 | Diethanolamine                                        |
| 186.0588 | 163.084 | 0.0149  | 186.0737 | 145 | 100  | N,N-Bis(2-hydroxyethyl)glycine                        |
| 186.0588 | 163.084 | 0.0149  | 186.0737 | 128 | 100  | N,N-Bis(2-hydroxyethyl)glycine                        |
| 876.8011 | 876     | 0       | 876.8    | 294 | 100  | TG 52:2; [M+NH4] <sup>+</sup> ;<br>TG(16:0/18:1/18:1) |
| 876.8011 | 876     | 0       | 876.8    | 310 | 86.6 | TG 52:2; [M+NH4] <sup>+</sup> ;<br>TG(16:0/18:1/18:1) |
| 876.8011 | 876     | 0       | 876.8    | 212 | 6.7  | TG 52:2; [M+NH4] <sup>+</sup> ;<br>TG(17:0/17:1/18:1) |
| 876.8011 | 876     | 0       | 876.8    | 207 | 5.4  | TG 52:2; [M+NH4] <sup>+</sup> ;<br>TG(16:1/18:0/18:1) |
| 876.8011 | 876     | 0       | 876.8    | 233 | 57.9 | TG 52:2; [M+NH4] <sup>+</sup> ;<br>TG(16:0/18:1/18:1) |
| 876.8011 | 876     | 0       | 876.8    | 224 | 42.1 | TG 52:2; [M+NH4] <sup>+</sup> ;<br>TG(16:1/18:0/18:1) |

|          |         |         |          |     |      |                                                       |
|----------|---------|---------|----------|-----|------|-------------------------------------------------------|
| 876.8011 | 876     | 0       | 876.8    | 306 | 90.4 | TG 52:2; [M+NH4] <sup>+</sup> ;<br>TG(16:0/18:1/18:1) |
| 876.8011 | 876     | 0       | 876.8    | 216 | 7.7  | TG 52:2; [M+NH4] <sup>+</sup> ;<br>TG(16:1/18:0/18:1) |
| 876.8011 | 876     | 0       | 876.8    | 178 | 1.9  | TG 52:2; [M+NH4] <sup>+</sup> ;<br>TG(16:0/18:0/18:2) |
| 118.0873 | 117.079 | -0.001  | 118.0863 | 333 | 29.8 | Betaine                                               |
| 118.0873 | 117.079 | -0.001  | 118.0863 | 333 | 29.8 | Betaine                                               |
| 118.0873 | 117.079 | -0.001  | 118.0863 | 330 | 29.8 | Betaine                                               |
| 118.0873 | 117.079 | -0.001  | 118.0863 | 275 | 58.7 | Betaine                                               |
| 118.0873 | 117.079 | -0.001  | 118.0863 | 275 | 58.7 | Betaine                                               |
| 118.0873 | 117.079 | -0.001  | 118.0863 | 272 | 58.7 | Betaine                                               |
| 118.0873 | 117.079 | -0.001  | 118.0863 | 324 | 38.4 | Betaine                                               |
| 118.0873 | 117.079 | -0.001  | 118.0863 | 324 | 38.4 | Betaine                                               |
| 118.0873 | 117.079 | -0.001  | 118.0863 | 320 | 38.4 | Betaine                                               |
| 84.0822  | 102.092 | -0.0014 | 84.0808  | 259 | 51   | Betaine aldehyde cation                               |
| 84.0822  | 102.092 | -0.0014 | 84.0808  | 258 | 49   | Betaine aldehyde cation                               |
| 84.0822  | 102.092 | -0.0014 | 84.0808  | 229 | 50   | Betaine aldehyde cation                               |
| 84.0822  | 102.092 | -0.0014 | 84.0808  | 229 | 50   | Betaine aldehyde cation                               |
| 84.0822  | 102.092 | -0.0014 | 84.0808  | 130 | 51   | Betaine aldehyde cation                               |
| 84.0822  | 102.092 | -0.0014 | 84.0808  | 129 | 49   | Betaine aldehyde cation                               |
| 84.0822  | 102.092 | -0.0014 | 84.0808  | 133 | 56   | Betaine aldehyde cation                               |
| 84.0822  | 102.092 | -0.0014 | 84.0808  | 127 | 44   | Betaine aldehyde cation                               |
| 186.0588 | 203.091 | 0.0285  | 186.0873 | 49  | 100  | Ala-Asn                                               |
| 186.0588 | 370.196 | 0.0467  | 186.1055 | 58  | 100  | Ser-His-Lys                                           |
| 148.0974 | 147     | -0.04   | 148.06   | 10  | 100  | O-acetyl-L-serine hydrochloride                       |
| 148.0974 | 147.053 | -0.037  | 148.0604 | 122 | 100  | O-Acetyl-L-serine                                     |
| 97.0774  | 114.104 | 0.0238  | 97.1012  | 26  | 28.9 | Cyclohexanemethanol                                   |
| 97.0774  | 114.104 | 0.0238  | 97.1012  | 22  | 24.4 | Cyclohexanol, 4-methyl-, trans-                       |
| 97.0774  | 114.104 | 0.0238  | 97.1012  | 22  | 24.4 | Cyclohexanol, 4-methyl-, trans-                       |
| 106.0872 | 105     | 0       | 106.09   | 190 | 67.3 | Diethanolamine                                        |
| 106.0872 | 105.079 | -0.0009 | 106.0863 | 168 | 26.6 | Diethanolamine                                        |
| 106.0872 | 105.079 | -0.0009 | 106.0863 | 166 | 26.6 | Diethanolamine                                        |
| 84.0822  | 102.092 | -0.0014 | 84.0808  | 298 | 51   | Betaine aldehyde cation                               |
| 84.0822  | 102.092 | -0.0014 | 84.0808  | 297 | 49   | Betaine aldehyde cation                               |
| 84.0822  | 102.092 | -0.0014 | 84.0808  | 242 | 54.2 | Betaine aldehyde cation                               |
| 84.0822  | 102.092 | -0.0014 | 84.0808  | 238 | 45.8 | Betaine aldehyde cation                               |
| 84.0822  | 102.092 | -0.0014 | 84.0808  | 202 | 52   | Betaine aldehyde cation                               |
| 84.0822  | 102.092 | -0.0014 | 84.0808  | 200 | 48   | Betaine aldehyde cation                               |
| 148.0974 | 147.053 | -0.037  | 148.0604 | 120 | 73.2 | O-Acetyl-L-serine                                     |
| 148.0974 | 147.053 | -0.037  | 148.0604 | 113 | 73.2 | O-Acetyl-L-serine                                     |
| 148.0974 | 147.053 | -0.037  | 148.0604 | 102 | 73.2 | O-Acetyl-L-serine                                     |
| 97.0774  | 114.104 | 0.0238  | 97.1012  | 39  | 30.9 | Cyclohexanemethanol                                   |
| 97.0774  | 114.104 | 0.0238  | 97.1012  | 38  | 29.7 | Cyclohexanol, 4-methyl-, trans-                       |
| 97.0774  | 114.104 | 0.0238  | 97.1012  | 37  | 30.9 | Cyclohexanemethanol                                   |
| 118.0873 | 117.079 | -0.001  | 118.0863 | 302 | 38.3 | Betaine                                               |
| 118.0873 | 117.079 | -0.001  | 118.0863 | 299 | 38.3 | Betaine                                               |

|          |         |         |          |     |      |                                 |
|----------|---------|---------|----------|-----|------|---------------------------------|
| 118.0873 | 117.079 | -0.001  | 118.0863 | 299 | 38.3 | Betaine                         |
| 118.0873 | 117.079 | -0.001  | 118.0863 | 358 | 60.1 | Betaine                         |
| 118.0873 | 117.079 | -0.001  | 118.0863 | 355 | 60.1 | Betaine                         |
| 118.0873 | 117.079 | -0.001  | 118.0863 | 351 | 60.1 | Betaine                         |
| 118.0873 | 117.079 | -0.001  | 118.0863 | 323 | 78   | Betaine                         |
| 118.0873 | 117.079 | -0.001  | 118.0863 | 310 | 78   | Betaine                         |
| 118.0873 | 117.079 | -0.001  | 118.0863 | 298 | 78   | Betaine                         |
| 118.0873 | 117.079 | -0.001  | 118.0863 | 293 | 65.5 | Betaine                         |
| 118.0873 | 117.079 | -0.001  | 118.0863 | 293 | 65.5 | Betaine                         |
| 118.0873 | 117.079 | -0.001  | 118.0863 | 289 | 65.5 | Betaine                         |
| 106.0872 | 105     | 0       | 106.09   | 158 | 80.2 | Diethanolamine                  |
| 106.0872 | 105.079 | -0.0009 | 106.0863 | 122 | 19.8 | Diethanolamine                  |
| 106.0872 | 105.079 | -0.0009 | 106.0863 | 122 | 19.8 | Diethanolamine                  |
| 106.0872 | 105     | 0       | 106.09   | 159 | 74.3 | Diethanolamine                  |
| 106.0872 | 105.079 | -0.0009 | 106.0863 | 127 | 19.9 | Diethanolamine                  |
| 106.0872 | 105.079 | -0.0009 | 106.0863 | 127 | 19.9 | Diethanolamine                  |
| 84.0822  | 102.092 | -0.0014 | 84.0808  | 310 | 52   | Betaine aldehyde cation         |
| 84.0822  | 102.092 | -0.0014 | 84.0808  | 308 | 48   | Betaine aldehyde cation         |
| 84.0822  | 102.092 | -0.0014 | 84.0808  | 287 | 50   | Betaine aldehyde cation         |
| 84.0822  | 102.092 | -0.0014 | 84.0808  | 287 | 50   | Betaine aldehyde cation         |
| 84.0822  | 102.092 | -0.0014 | 84.0808  | 193 | 51   | Betaine aldehyde cation         |
| 84.0822  | 102.092 | -0.0014 | 84.0808  | 192 | 49   | Betaine aldehyde cation         |
| 84.0822  | 102.092 | -0.0014 | 84.0808  | 143 | 51   | Betaine aldehyde cation         |
| 84.0822  | 102.092 | -0.0014 | 84.0808  | 142 | 49   | Betaine aldehyde cation         |
| 186.0588 | 370.196 | 0.0467  | 186.1055 | 31  | 100  | Ser-His-Lys                     |
| 186.0588 | 163.084 | 0.0149  | 186.0737 | 176 | 100  | N,N-Bis(2-hydroxyethyl)glycine  |
| 186.0588 | 163.084 | 0.0149  | 186.0737 | 155 | 88.9 | N,N-Bis(2-hydroxyethyl)glycine  |
| 186.0588 | 370.196 | 0.0467  | 186.1055 | 56  | 6.7  | Ser-His-Lys                     |
| 186.0588 | 370.196 | 0.0467  | 186.1055 | 43  | 4.3  | Ser-His-Lys                     |
| 170.0793 | 187.121 | 0.0383  | 170.1176 | 26  | 100  | 7-Keto-8-aminopelargonic acid   |
| 97.0774  | 114.104 | 0.0238  | 97.1012  | 28  | 24   | Cyclohexanol, 1-methyl-         |
| 97.0774  | 114.104 | 0.0238  | 97.1012  | 20  | 17.9 | Cycloheptanol                   |
| 97.0774  | 114.104 | 0.0238  | 97.1012  | 17  | 15.9 | Cyclohexanol, 2-methyl-, trans- |
| 118.0873 | 117.079 | -0.001  | 118.0863 | 249 | 100  | Betaine                         |
| 118.0873 | 117.079 | -0.001  | 118.0863 | 233 | 100  | Betaine                         |
| 118.0873 | 117.079 | -0.001  | 118.0863 | 211 | 100  | Betaine                         |
| 118.0873 | 117.079 | -0.001  | 118.0863 | 402 | 66.2 | Betaine                         |
| 118.0873 | 117.079 | -0.001  | 118.0863 | 398 | 66.2 | Betaine                         |
| 118.0873 | 117.079 | -0.001  | 118.0863 | 388 | 66.2 | Betaine                         |
| 118.0873 | 117.079 | -0.001  | 118.0863 | 289 | 65.4 | Betaine                         |
| 118.0873 | 117.079 | -0.001  | 118.0863 | 287 | 65.4 | Betaine                         |
| 118.0873 | 117.079 | -0.001  | 118.0863 | 284 | 65.4 | Betaine                         |
| 118.0873 | 117.079 | -0.001  | 118.0863 | 300 | 67.6 | Betaine                         |
| 118.0873 | 117.079 | -0.001  | 118.0863 | 300 | 67.6 | Betaine                         |
| 118.0873 | 117.079 | -0.001  | 118.0863 | 296 | 67.6 | Betaine                         |
| 106.0872 | 105     | 0       | 106.09   | 158 | 79.3 | Diethanolamine                  |
| 106.0872 | 105.079 | -0.0009 | 106.0863 | 125 | 20.7 | Diethanolamine                  |

|          |         |         |          |     |      |                                 |
|----------|---------|---------|----------|-----|------|---------------------------------|
| 106.0872 | 105.079 | -0.0009 | 106.0863 | 125 | 20.7 | Diethanolamine                  |
| 106.0872 | 105     | 0       | 106.09   | 156 | 75.1 | Diethanolamine                  |
| 106.0872 | 105.079 | -0.0009 | 106.0863 | 119 | 18.3 | Diethanolamine                  |
| 106.0872 | 105.079 | -0.0009 | 106.0863 | 118 | 18.3 | Diethanolamine                  |
| 106.0872 | 105     | 0       | 106.09   | 156 | 60.8 | Diethanolamine                  |
| 106.0872 | 105.079 | -0.0009 | 106.0863 | 141 | 36.9 | Diethanolamine                  |
| 106.0872 | 105.079 | -0.0009 | 106.0863 | 140 | 36.9 | Diethanolamine                  |
| 186.0588 | 203.091 | 0.0285  | 186.0873 | 78  | 100  | Ala-Asn                         |
| 186.0588 | 163.084 | 0.0149  | 186.0737 | 131 | 100  | N,N-Bis(2-hydroxyethyl)glycine  |
| 186.0588 | 370.196 | 0.0467  | 186.1055 | 61  | 100  | Ser-His-Lys                     |
| 186.0588 | 163.084 | 0.0149  | 186.0737 | 155 | 100  | N,N-Bis(2-hydroxyethyl)glycine  |
| 148.0974 | 147     | -0.04   | 148.06   | 6   | 100  | O-acetyl-L-serine hydrochloride |
| 148.0974 | 147.053 | -0.037  | 148.0604 | 148 | 100  | O-Acetyl-L-serine               |
| 118.0873 | 117.079 | -0.001  | 118.0863 | 339 | 30.3 | Betaine                         |
| 118.0873 | 117.079 | -0.001  | 118.0863 | 339 | 30.3 | Betaine                         |
| 118.0873 | 117.079 | -0.001  | 118.0863 | 335 | 30.3 | Betaine                         |
| 118.0873 | 117.079 | -0.001  | 118.0863 | 272 | 50.4 | Betaine                         |
| 118.0873 | 117.079 | -0.001  | 118.0863 | 272 | 50.4 | Betaine                         |
| 118.0873 | 117.079 | -0.001  | 118.0863 | 270 | 50.4 | Betaine                         |
| 118.0873 | 117.079 | -0.001  | 118.0863 | 325 | 32.8 | Betaine                         |
| 118.0873 | 117.079 | -0.001  | 118.0863 | 322 | 32.8 | Betaine                         |
| 118.0873 | 117.079 | -0.001  | 118.0863 | 322 | 32.8 | Betaine                         |
| 84.0822  | 102.092 | -0.0014 | 84.0808  | 251 | 51   | Betaine aldehyde cation         |
| 84.0822  | 102.092 | -0.0014 | 84.0808  | 250 | 49   | Betaine aldehyde cation         |
| 84.0822  | 102.092 | -0.0014 | 84.0808  | 207 | 54.2 | Betaine aldehyde cation         |
| 84.0822  | 102.092 | -0.0014 | 84.0808  | 203 | 45.8 | Betaine aldehyde cation         |
| 84.0822  | 102.092 | -0.0014 | 84.0808  | 176 | 52   | Betaine aldehyde cation         |
| 84.0822  | 102.092 | -0.0014 | 84.0808  | 174 | 48   | Betaine aldehyde cation         |
| 186.0588 | 370.196 | 0.0467  | 186.1055 | 46  | 35.9 | Ser-His-Lys                     |
| 186.0588 | 370.196 | 0.0467  | 186.1055 | 38  | 26.8 | Ser-His-Lys                     |
| 186.0588 | 370.196 | 0.0467  | 186.1055 | 29  | 19.4 | Ser-His-Lys                     |
| 186.0588 | 370.196 | 0.0467  | 186.1055 | 83  | 100  | Ser-His-Lys                     |
| 97.0774  | 114.104 | 0.0238  | 97.1012  | 24  | 55.4 | Cyclohexanemethanol             |
| 97.0774  | 114.104 | 0.0238  | 97.1012  | 20  | 55.4 | Cyclohexanemethanol             |
| 97.0774  | 114.104 | 0.0238  | 97.1012  | 19  | 44.6 | Cyclohexanol, 4-methyl-, trans- |
| 106.0872 | 105     | 0       | 106.09   | 156 | 78.2 | Diethanolamine                  |
| 106.0872 | 105.079 | -0.0009 | 106.0863 | 126 | 21.8 | Diethanolamine                  |
| 106.0872 | 105.079 | -0.0009 | 106.0863 | 126 | 21.8 | Diethanolamine                  |
| 106.0872 | 105     | 0       | 106.09   | 159 | 75.8 | Diethanolamine                  |
| 106.0872 | 105.079 | -0.0009 | 106.0863 | 124 | 19   | Diethanolamine                  |
| 106.0872 | 105.079 | -0.0009 | 106.0863 | 124 | 19   | Diethanolamine                  |
| 84.0822  | 102.092 | -0.0014 | 84.0808  | 276 | 50   | Betaine aldehyde cation         |
| 84.0822  | 102.092 | -0.0014 | 84.0808  | 276 | 50   | Betaine aldehyde cation         |
| 84.0822  | 102.092 | -0.0014 | 84.0808  | 265 | 51   | Betaine aldehyde cation         |
| 84.0822  | 102.092 | -0.0014 | 84.0808  | 264 | 49   | Betaine aldehyde cation         |
| 118.0873 | 117.079 | -0.001  | 118.0863 | 415 | 93.2 | Betaine                         |
| 118.0873 | 117.079 | -0.001  | 118.0863 | 412 | 93.2 | Betaine                         |

|          |         |         |          |     |      |                                 |
|----------|---------|---------|----------|-----|------|---------------------------------|
| 118.0873 | 117.079 | -0.001  | 118.0863 | 406 | 93.2 | Betaine                         |
| 118.0873 | 117.079 | -0.001  | 118.0863 | 327 | 33.7 | Betaine                         |
| 118.0873 | 117.079 | -0.001  | 118.0863 | 324 | 33.7 | Betaine                         |
| 118.0873 | 117.079 | -0.001  | 118.0863 | 323 | 33.7 | Betaine                         |
| 118.0873 | 117.079 | -0.001  | 118.0863 | 308 | 58.5 | Betaine                         |
| 118.0873 | 117.079 | -0.001  | 118.0863 | 307 | 58.5 | Betaine                         |
| 118.0873 | 117.079 | -0.001  | 118.0863 | 302 | 58.5 | Betaine                         |
| 106.0872 | 105     | 0       | 106.09   | 149 | 74.5 | Diethanolamine                  |
| 106.0872 | 105.079 | -0.0009 | 106.0863 | 114 | 18.7 | Diethanolamine                  |
| 106.0872 | 105.079 | -0.0009 | 106.0863 | 113 | 18.7 | Diethanolamine                  |
| 106.0872 | 105     | 0       | 106.09   | 235 | 77.3 | Diethanolamine                  |
| 106.0872 | 105.079 | -0.0009 | 106.0863 | 200 | 19.4 | Diethanolamine                  |
| 106.0872 | 105.079 | -0.0009 | 106.0863 | 198 | 19.4 | Diethanolamine                  |
| 106.0872 | 105     | 0       | 106.09   | 159 | 76.8 | Diethanolamine                  |
| 106.0872 | 105.079 | -0.0009 | 106.0863 | 119 | 17.8 | Diethanolamine                  |
| 106.0872 | 105.079 | -0.0009 | 106.0863 | 119 | 17.8 | Diethanolamine                  |
| 84.0822  | 102.092 | -0.0014 | 84.0808  | 299 | 50   | Betaine aldehyde cation         |
| 84.0822  | 102.092 | -0.0014 | 84.0808  | 299 | 50   | Betaine aldehyde cation         |
| 84.0822  | 102.092 | -0.0014 | 84.0808  | 267 | 52   | Betaine aldehyde cation         |
| 84.0822  | 102.092 | -0.0014 | 84.0808  | 265 | 48   | Betaine aldehyde cation         |
| 84.0822  | 102.092 | -0.0014 | 84.0808  | 221 | 56.6 | Betaine aldehyde cation         |
| 84.0822  | 102.092 | -0.0014 | 84.0808  | 214 | 43.4 | Betaine aldehyde cation         |
| 186.0588 | 163.084 | 0.0149  | 186.0737 | 184 | 90.9 | N,N-Bis(2-hydroxyethyl)glycine  |
| 186.0588 | 163.084 | 0.0149  | 186.0737 | 142 | 90.9 | N,N-Bis(2-hydroxyethyl)glycine  |
| 186.0588 | 203.091 | 0.0285  | 186.0873 | 89  | 7.4  | Ala-Asn                         |
| 186.0588 | 163.084 | 0.0149  | 186.0737 | 172 | 100  | N,N-Bis(2-hydroxyethyl)glycine  |
| 186.0588 | 163.084 | 0.0149  | 186.0737 | 99  | 100  | N,N-Bis(2-hydroxyethyl)glycine  |
| 186.0588 | 163.084 | 0.0149  | 186.0737 | 141 | 100  | N,N-Bis(2-hydroxyethyl)glycine  |
| 97.0774  | 114.104 | 0.0238  | 97.1012  | 33  | 20.3 | Cyclohexanol, 1-methyl-         |
| 97.0774  | 114.104 | 0.0238  | 97.1012  | 33  | 20.3 | Cyclohexanol, 4-methyl-, trans- |
| 97.0774  | 114.104 | 0.0238  | 97.1012  | 29  | 17.2 | Cyclohexanemethanol             |
| 118.0873 | 117.079 | -0.001  | 118.0863 | 365 | 35.5 | Betaine                         |
| 118.0873 | 117.079 | -0.001  | 118.0863 | 364 | 35.5 | Betaine                         |
| 118.0873 | 117.079 | -0.001  | 118.0863 | 359 | 35.5 | Betaine                         |
| 118.0873 | 117.079 | -0.001  | 118.0863 | 321 | 39.6 | Betaine                         |
| 118.0873 | 117.079 | -0.001  | 118.0863 | 317 | 39.6 | Betaine                         |
| 118.0873 | 117.079 | -0.001  | 118.0863 | 316 | 39.6 | Betaine                         |
| 118.0873 | 117.079 | -0.001  | 118.0863 | 318 | 47.3 | Betaine                         |
| 118.0873 | 117.079 | -0.001  | 118.0863 | 316 | 47.3 | Betaine                         |
| 118.0873 | 117.079 | -0.001  | 118.0863 | 315 | 47.3 | Betaine                         |
| 106.0872 | 105     | 0       | 106.09   | 228 | 79.6 | Diethanolamine                  |
| 106.0872 | 105.079 | -0.0009 | 106.0863 | 194 | 20.4 | Diethanolamine                  |
| 106.0872 | 105.079 | -0.0009 | 106.0863 | 193 | 20.4 | Diethanolamine                  |
| 106.0872 | 105     | 0       | 106.09   | 158 | 80.9 | Diethanolamine                  |
| 106.0872 | 105.079 | -0.0009 | 106.0863 | 119 | 19.1 | Diethanolamine                  |
| 106.0872 | 105.079 | -0.0009 | 106.0863 | 118 | 19.1 | Diethanolamine                  |
| 106.0872 | 105     | 0       | 106.09   | 159 | 75.5 | Diethanolamine                  |

|          |         |         |          |     |      |                                 |
|----------|---------|---------|----------|-----|------|---------------------------------|
| 106.0872 | 105.079 | -0.0009 | 106.0863 | 125 | 19.4 | Diethanolamine                  |
| 106.0872 | 105.079 | -0.0009 | 106.0863 | 124 | 19.4 | Diethanolamine                  |
| 186.0588 | 203.091 | 0.0285  | 186.0873 | 106 | 70.2 | Ala-Asn                         |
| 186.0588 | 203.095 | 0.0325  | 186.0913 | 85  | 29.8 | Indole-3-butyric acid           |
| 186.0588 | 370.196 | 0.0467  | 186.1055 | 33  | 100  | Ser-His-Lys                     |
| 186.0588 | 370.196 | 0.0467  | 186.1055 | 48  | 100  | Ser-His-Lys                     |
| 148.0974 | 147     | -0.04   | 148.06   | 19  | 100  | O-acetyl-L-serine hydrochloride |
| 148.0974 | 147.053 | -0.037  | 148.0604 | 171 | 100  | O-Acetyl-L-serine               |
| 148.0974 | 147.053 | -0.037  | 148.0604 | 160 | 100  | O-Acetyl-L-serine               |
| 148.0974 | 147.053 | -0.037  | 148.0604 | 107 | 100  | O-Acetyl-L-serine               |
| 118.0873 | 117.079 | -0.001  | 118.0863 | 321 | 34.7 | Betaine                         |
| 118.0873 | 117.079 | -0.001  | 118.0863 | 319 | 34.7 | Betaine                         |
| 118.0873 | 117.079 | -0.001  | 118.0863 | 318 | 34.7 | Betaine                         |
| 84.0822  | 102.092 | -0.0014 | 84.0808  | 269 | 53.1 | Betaine aldehyde cation         |
| 84.0822  | 102.092 | -0.0014 | 84.0808  | 266 | 46.9 | Betaine aldehyde cation         |
| 84.0822  | 102.092 | -0.0014 | 84.0808  | 213 | 51   | Betaine aldehyde cation         |
| 84.0822  | 102.092 | -0.0014 | 84.0808  | 212 | 49   | Betaine aldehyde cation         |
| 84.0822  | 102.092 | -0.0014 | 84.0808  | 222 | 55.4 | Betaine aldehyde cation         |
| 84.0822  | 102.092 | -0.0014 | 84.0808  | 217 | 44.6 | Betaine aldehyde cation         |
| 186.0588 | 163.084 | 0.0149  | 186.0737 | 113 | 84.9 | N,N-Bis(2-hydroxyethyl)glycine  |
| 186.0588 | 163.084 | 0.0149  | 186.0737 | 78  | 84.9 | N,N-Bis(2-hydroxyethyl)glycine  |
| 186.0588 | 203.091 | 0.0285  | 186.0873 | 53  | 15.1 | Ala-Asn                         |
| 186.0588 | 163.084 | 0.0149  | 186.0737 | 141 | 100  | N,N-Bis(2-hydroxyethyl)glycine  |
| 186.0588 | 370.196 | 0.0467  | 186.1055 | 107 | 100  | Ser-His-Lys                     |
| 148.0974 | 147     | -0.04   | 148.06   | 35  | 30.6 | O-acetyl-L-serine hydrochloride |
| 148.0974 | 147     | -0.04   | 148.06   | 35  | 30.6 | N-acetyl-DL-serine              |
| 148.0974 | 147.053 | -0.037  | 148.0604 | 29  | 24.1 | O-Acetyl-L-serine               |
| 148.0974 | 147     | -0.04   | 148.06   | 5   | 100  | O-acetyl-L-serine hydrochloride |
| 148.0974 | 147.053 | -0.037  | 148.0604 | 102 | 73.2 | O-Acetyl-L-serine               |
| 148.0974 | 147.053 | -0.037  | 148.0604 | 96  | 73.2 | O-Acetyl-L-serine               |
| 148.0974 | 147.053 | -0.037  | 148.0604 | 87  | 73.2 | O-Acetyl-L-serine               |
| 106.0872 | 105     | 0       | 106.09   | 158 | 79.6 | Diethanolamine                  |
| 106.0872 | 105.079 | -0.0009 | 106.0863 | 124 | 20.4 | Diethanolamine                  |
| 106.0872 | 105.079 | -0.0009 | 106.0863 | 123 | 20.4 | Diethanolamine                  |
| 84.0822  | 102.092 | -0.0014 | 84.0808  | 280 | 51   | Betaine aldehyde cation         |
| 84.0822  | 102.092 | -0.0014 | 84.0808  | 279 | 49   | Betaine aldehyde cation         |
| 84.0822  | 102.092 | -0.0014 | 84.0808  | 242 | 51   | Betaine aldehyde cation         |
| 84.0822  | 102.092 | -0.0014 | 84.0808  | 241 | 49   | Betaine aldehyde cation         |
| 84.0822  | 102.092 | -0.0014 | 84.0808  | 225 | 54.2 | Betaine aldehyde cation         |
| 84.0822  | 102.092 | -0.0014 | 84.0808  | 221 | 45.8 | Betaine aldehyde cation         |
| 118.0873 | 117.079 | -0.001  | 118.0863 | 376 | 99   | Betaine                         |
| 118.0873 | 117.079 | -0.001  | 118.0863 | 375 | 99   | Betaine                         |
| 118.0873 | 117.079 | -0.001  | 118.0863 | 373 | 99   | Betaine                         |
| 118.0873 | 117.079 | -0.001  | 118.0863 | 276 | 57.9 | Betaine                         |
| 118.0873 | 117.079 | -0.001  | 118.0863 | 274 | 57.9 | Betaine                         |
| 118.0873 | 117.079 | -0.001  | 118.0863 | 271 | 57.9 | Betaine                         |
| 118.0873 | 117.079 | -0.001  | 118.0863 | 301 | 69.2 | Betaine                         |

|          |         |         |          |     |      |                                 |
|----------|---------|---------|----------|-----|------|---------------------------------|
| 118.0873 | 117.079 | -0.001  | 118.0863 | 296 | 69.2 | Betaine                         |
| 118.0873 | 117.079 | -0.001  | 118.0863 | 293 | 69.2 | Betaine                         |
| 106.0872 | 105     | 0       | 106.09   | 159 | 78.6 | Diethanolamine                  |
| 106.0872 | 105.079 | -0.0009 | 106.0863 | 128 | 21.4 | Diethanolamine                  |
| 106.0872 | 105.079 | -0.0009 | 106.0863 | 128 | 21.4 | Diethanolamine                  |
| 106.0872 | 105     | 0       | 106.09   | 158 | 76   | Diethanolamine                  |
| 106.0872 | 105.079 | -0.0009 | 106.0863 | 121 | 18.5 | Diethanolamine                  |
| 106.0872 | 105.079 | -0.0009 | 106.0863 | 120 | 18.5 | Diethanolamine                  |
| 106.0872 | 105     | 0       | 106.09   | 277 | 60.6 | Diethanolamine                  |
| 106.0872 | 105.079 | -0.0009 | 106.0863 | 262 | 36.7 | Diethanolamine                  |
| 106.0872 | 105.079 | -0.0009 | 106.0863 | 261 | 36.7 | Diethanolamine                  |
| 84.0822  | 102.092 | -0.0014 | 84.0808  | 302 | 53.1 | Betaine aldehyde cation         |
| 84.0822  | 102.092 | -0.0014 | 84.0808  | 299 | 46.9 | Betaine aldehyde cation         |
| 84.0822  | 102.092 | -0.0014 | 84.0808  | 265 | 53.1 | Betaine aldehyde cation         |
| 84.0822  | 102.092 | -0.0014 | 84.0808  | 262 | 46.9 | Betaine aldehyde cation         |
| 84.0822  | 102.092 | -0.0014 | 84.0808  | 162 | 51   | Betaine aldehyde cation         |
| 84.0822  | 102.092 | -0.0014 | 84.0808  | 161 | 49   | Betaine aldehyde cation         |
| 84.0822  | 102.092 | -0.0014 | 84.0808  | 216 | 52   | Betaine aldehyde cation         |
| 84.0822  | 102.092 | -0.0014 | 84.0808  | 214 | 48   | Betaine aldehyde cation         |
| 186.0588 | 163.084 | 0.0149  | 186.0737 | 142 | 100  | N,N-Bis(2-hydroxyethyl)glycine  |
| 186.0588 | 163.084 | 0.0149  | 186.0737 | 164 | 100  | N,N-Bis(2-hydroxyethyl)glycine  |
| 148.0974 | 147     | -0.04   | 148.06   | 23  | 55.4 | O-acetyl-L-serine hydrochloride |
| 148.0974 | 147     | -0.04   | 148.06   | 18  | 44.6 | N-acetyl-DL-serine              |
| 148.0974 | 147     | -0.04   | 148.06   | 6   | 100  | O-acetyl-L-serine hydrochloride |
| 148.0974 | 147.053 | -0.037  | 148.0604 | 173 | 61.4 | O-Acetyl-L-serine               |
| 148.0974 | 147.053 | -0.037  | 148.0604 | 162 | 61.4 | O-Acetyl-L-serine               |
| 148.0974 | 147     | -0.04   | 148.06   | 154 | 29.8 | O-acetyl-L-serine hydrochloride |
| 148.0974 | 147.053 | -0.037  | 148.0604 | 175 | 66.1 | O-Acetyl-L-serine               |
| 148.0974 | 147.053 | -0.037  | 148.0604 | 162 | 66.1 | O-Acetyl-L-serine               |
| 148.0974 | 147     | -0.04   | 148.06   | 153 | 26.1 | O-acetyl-L-serine hydrochloride |
| 97.0774  | 114.104 | 0.0238  | 97.1012  | 43  | 26.6 | Cyclohexanol, 1-methyl-         |
| 97.0774  | 114.104 | 0.0238  | 97.1012  | 31  | 17.7 | Cycloheptanol                   |
| 97.0774  | 114.104 | 0.0238  | 97.1012  | 29  | 16.3 | Cyclohexanol, 4-methyl-, trans- |
| 118.0873 | 117.079 | -0.001  | 118.0863 | 383 | 100  | Betaine                         |
| 118.0873 | 117.079 | -0.001  | 118.0863 | 379 | 100  | Betaine                         |
| 118.0873 | 117.079 | -0.001  | 118.0863 | 377 | 100  | Betaine                         |
| 118.0873 | 117.079 | -0.001  | 118.0863 | 269 | 56.3 | Betaine                         |
| 118.0873 | 117.079 | -0.001  | 118.0863 | 269 | 56.3 | Betaine                         |
| 118.0873 | 117.079 | -0.001  | 118.0863 | 266 | 56.3 | Betaine                         |
| 118.0873 | 117.079 | -0.001  | 118.0863 | 380 | 50.1 | Betaine                         |
| 118.0873 | 117.079 | -0.001  | 118.0863 | 379 | 50.1 | Betaine                         |
| 118.0873 | 117.079 | -0.001  | 118.0863 | 376 | 50.1 | Betaine                         |
| 106.0872 | 105     | 0       | 106.09   | 114 | 71.4 | Diethanolamine                  |
| 106.0872 | 105.079 | -0.0009 | 106.0863 | 83  | 19.4 | Diethanolamine                  |
| 106.0872 | 105.079 | -0.0009 | 106.0863 | 83  | 19.4 | Diethanolamine                  |
| 106.0872 | 105     | 0       | 106.09   | 156 | 75.6 | Diethanolamine                  |
| 106.0872 | 105.079 | -0.0009 | 106.0863 | 119 | 18.4 | Diethanolamine                  |



|          |         |         |          |     |      |                                 |
|----------|---------|---------|----------|-----|------|---------------------------------|
| 106.0872 | 105.079 | -0.0009 | 106.0863 | 118 | 18.4 | Diethanolamine                  |
| 106.0872 | 105     | 0       | 106.09   | 163 | 100  | Diethanolamine                  |
| 106.0872 | 105     | 0       | 106.09   | 225 | 76.9 | Diethanolamine                  |
| 106.0872 | 105.079 | -0.0009 | 106.0863 | 199 | 23.1 | Diethanolamine                  |
| 106.0872 | 105.079 | -0.0009 | 106.0863 | 198 | 23.1 | Diethanolamine                  |
| 84.0822  | 102.092 | -0.0014 | 84.0808  | 316 | 54.2 | Betaine aldehyde cation         |
| 84.0822  | 102.092 | -0.0014 | 84.0808  | 312 | 45.8 | Betaine aldehyde cation         |
| 84.0822  | 102.092 | -0.0014 | 84.0808  | 272 | 51   | Betaine aldehyde cation         |
| 84.0822  | 102.092 | -0.0014 | 84.0808  | 271 | 49   | Betaine aldehyde cation         |
| 84.0822  | 102.092 | -0.0014 | 84.0808  | 211 | 52   | Betaine aldehyde cation         |
| 84.0822  | 102.092 | -0.0014 | 84.0808  | 209 | 48   | Betaine aldehyde cation         |
| 84.0822  | 102.092 | -0.0014 | 84.0808  | 155 | 51   | Betaine aldehyde cation         |
| 84.0822  | 102.092 | -0.0014 | 84.0808  | 154 | 49   | Betaine aldehyde cation         |
| 186.0588 | 163.084 | 0.0149  | 186.0737 | 124 | 100  | N,N-Bis(2-hydroxyethyl)glycine  |
| 118.0873 | 117.079 | -0.001  | 118.0863 | 266 | 58.7 | Betaine                         |
| 118.0873 | 117.079 | -0.001  | 118.0863 | 265 | 58.7 | Betaine                         |
| 118.0873 | 117.079 | -0.001  | 118.0863 | 262 | 58.7 | Betaine                         |
| 118.0873 | 117.079 | -0.001  | 118.0863 | 305 | 100  | Betaine                         |
| 118.0873 | 117.079 | -0.001  | 118.0863 | 305 | 100  | Betaine                         |
| 118.0873 | 117.079 | -0.001  | 118.0863 | 297 | 100  | Betaine                         |
| 84.0822  | 102.092 | -0.0014 | 84.0808  | 274 | 53.1 | Betaine aldehyde cation         |
| 84.0822  | 102.092 | -0.0014 | 84.0808  | 271 | 46.9 | Betaine aldehyde cation         |
| 84.0822  | 102.092 | -0.0014 | 84.0808  | 217 | 52   | Betaine aldehyde cation         |
| 84.0822  | 102.092 | -0.0014 | 84.0808  | 215 | 48   | Betaine aldehyde cation         |
| 84.0822  | 102.092 | -0.0014 | 84.0808  | 148 | 50   | Betaine aldehyde cation         |
| 84.0822  | 102.092 | -0.0014 | 84.0808  | 148 | 50   | Betaine aldehyde cation         |
| 186.0588 | 370.196 | 0.0467  | 186.1055 | 60  | 100  | Ser-His-Lys                     |
| 186.0588 | 163.084 | 0.0149  | 186.0737 | 118 | 100  | N,N-Bis(2-hydroxyethyl)glycine  |
| 186.0588 | 370.196 | 0.0467  | 186.1055 | 59  | 100  | Ser-His-Lys                     |
| 148.0974 | 147.053 | -0.037  | 148.0604 | 147 | 100  | O-Acetyl-L-serine               |
| 148.0974 | 147.053 | -0.037  | 148.0604 | 122 | 100  | O-Acetyl-L-serine               |
| 148.0974 | 147.053 | -0.037  | 148.0604 | 116 | 100  | O-Acetyl-L-serine               |
| 106.0872 | 105     | 0       | 106.09   | 159 | 73.2 | Diethanolamine                  |
| 106.0872 | 105.079 | -0.0009 | 106.0863 | 131 | 21.1 | Diethanolamine                  |
| 106.0872 | 105.079 | -0.0009 | 106.0863 | 130 | 21.1 | Diethanolamine                  |
| 84.0822  | 102.092 | -0.0014 | 84.0808  | 244 | 52   | Betaine aldehyde cation         |
| 84.0822  | 102.092 | -0.0014 | 84.0808  | 242 | 48   | Betaine aldehyde cation         |
| 84.0822  | 102.092 | -0.0014 | 84.0808  | 230 | 51   | Betaine aldehyde cation         |
| 84.0822  | 102.092 | -0.0014 | 84.0808  | 229 | 49   | Betaine aldehyde cation         |
| 84.0822  | 102.092 | -0.0014 | 84.0808  | 176 | 53.1 | Betaine aldehyde cation         |
| 84.0822  | 102.092 | -0.0014 | 84.0808  | 173 | 46.9 | Betaine aldehyde cation         |
| 84.0822  | 102.092 | -0.0014 | 84.0808  | 205 | 54.2 | Betaine aldehyde cation         |
| 84.0822  | 102.092 | -0.0014 | 84.0808  | 201 | 45.8 | Betaine aldehyde cation         |
| 148.0974 | 147.053 | -0.037  | 148.0604 | 168 | 76.6 | O-Acetyl-L-serine               |
| 148.0974 | 147.053 | -0.037  | 148.0604 | 157 | 76.6 | O-Acetyl-L-serine               |
| 148.0974 | 147     | -0.04   | 148.06   | 143 | 23.4 | O-acetyl-L-serine hydrochloride |
| 97.0774  | 114.104 | 0.0238  | 97.1012  | 29  | 28.4 | Cyclohexanol, 1-methyl-         |

|          |         |         |          |     |      |                                       |
|----------|---------|---------|----------|-----|------|---------------------------------------|
| 97.0774  | 114.104 | 0.0238  | 97.1012  | 22  | 21.7 | Cycloheptanol                         |
| 97.0774  | 114.104 | 0.0238  | 97.1012  | 16  | 17.1 | Cyclopentanemethanol, .alpha.-methyl- |
| 97.0774  | 114.104 | 0.0238  | 97.1012  | 35  | 25.1 | Cyclohexanemethanol                   |
| 97.0774  | 114.104 | 0.0238  | 97.1012  | 33  | 23.2 | Cyclohexanol, 4-methyl-, trans-       |
| 97.0774  | 114.104 | 0.0238  | 97.1012  | 30  | 25.1 | Cyclohexanemethanol                   |
| 118.0873 | 117.079 | -0.001  | 118.0863 | 353 | 56.8 | Betaine                               |
| 118.0873 | 117.079 | -0.001  | 118.0863 | 350 | 56.8 | Betaine                               |
| 118.0873 | 117.079 | -0.001  | 118.0863 | 346 | 56.8 | Betaine                               |
| 118.0873 | 117.079 | -0.001  | 118.0863 | 278 | 89.4 | Betaine                               |
| 118.0873 | 117.079 | -0.001  | 118.0863 | 271 | 89.4 | Betaine                               |
| 118.0873 | 117.079 | -0.001  | 118.0863 | 267 | 89.4 | Betaine                               |
| 118.0873 | 117.079 | -0.001  | 118.0863 | 382 | 43.5 | Betaine                               |
| 118.0873 | 117.079 | -0.001  | 118.0863 | 381 | 43.5 | Betaine                               |
| 118.0873 | 117.079 | -0.001  | 118.0863 | 377 | 43.5 | Betaine                               |
| 106.0872 | 105     | 0       | 106.09   | 140 | 74.2 | Diethanolamine                        |
| 106.0872 | 105.079 | -0.0009 | 106.0863 | 107 | 19.4 | Diethanolamine                        |
| 106.0872 | 105.079 | -0.0009 | 106.0863 | 106 | 19.4 | Diethanolamine                        |
| 106.0872 | 105     | 0       | 106.09   | 221 | 80.7 | Diethanolamine                        |
| 106.0872 | 105.079 | -0.0009 | 106.0863 | 183 | 19.3 | Diethanolamine                        |
| 106.0872 | 105.079 | -0.0009 | 106.0863 | 183 | 19.3 | Diethanolamine                        |
| 84.0822  | 102.092 | -0.0014 | 84.0808  | 299 | 52   | Betaine aldehyde cation               |
| 84.0822  | 102.092 | -0.0014 | 84.0808  | 297 | 48   | Betaine aldehyde cation               |
| 84.0822  | 102.092 | -0.0014 | 84.0808  | 290 | 51   | Betaine aldehyde cation               |
| 84.0822  | 102.092 | -0.0014 | 84.0808  | 289 | 49   | Betaine aldehyde cation               |
| 84.0822  | 102.092 | -0.0014 | 84.0808  | 223 | 55.4 | Betaine aldehyde cation               |
| 84.0822  | 102.092 | -0.0014 | 84.0808  | 218 | 44.6 | Betaine aldehyde cation               |
| 186.0588 | 163.084 | 0.0149  | 186.0737 | 165 | 100  | N,N-Bis(2-hydroxyethyl)glycine        |
| 118.0873 | 117.079 | -0.001  | 118.0863 | 410 | 49.1 | Betaine                               |
| 118.0873 | 117.079 | -0.001  | 118.0863 | 410 | 49.1 | Betaine                               |
| 118.0873 | 117.079 | -0.001  | 118.0863 | 406 | 49.1 | Betaine                               |
| 118.0873 | 117.079 | -0.001  | 118.0863 | 266 | 53.6 | Betaine                               |
| 118.0873 | 117.079 | -0.001  | 118.0863 | 265 | 53.6 | Betaine                               |
| 118.0873 | 117.079 | -0.001  | 118.0863 | 263 | 53.6 | Betaine                               |
| 118.0873 | 117.079 | -0.001  | 118.0863 | 352 | 98   | Betaine                               |
| 118.0873 | 117.079 | -0.001  | 118.0863 | 348 | 98   | Betaine                               |
| 118.0873 | 117.079 | -0.001  | 118.0863 | 346 | 98   | Betaine                               |
| 106.0872 | 105     | 0       | 106.09   | 166 | 73   | Diethanolamine                        |
| 106.0872 | 105.079 | -0.0009 | 106.0863 | 136 | 20.3 | Diethanolamine                        |
| 106.0872 | 105.079 | -0.0009 | 106.0863 | 136 | 20.3 | Diethanolamine                        |
| 106.0872 | 105     | 0       | 106.09   | 156 | 79.3 | Diethanolamine                        |
| 106.0872 | 105.079 | -0.0009 | 106.0863 | 123 | 20.7 | Diethanolamine                        |
| 106.0872 | 105.079 | -0.0009 | 106.0863 | 122 | 20.7 | Diethanolamine                        |
| 106.0872 | 105     | 0       | 106.09   | 267 | 56.6 | Diethanolamine                        |
| 106.0872 | 105.079 | -0.0009 | 106.0863 | 257 | 40   | Diethanolamine                        |
| 106.0872 | 105.079 | -0.0009 | 106.0863 | 256 | 40   | Diethanolamine                        |
| 106.0872 | 105.079 | -0.0009 | 106.0863 | 113 | 100  | Diethanolamine                        |

|          |         |         |          |     |      |                                 |
|----------|---------|---------|----------|-----|------|---------------------------------|
| 106.0872 | 105.079 | -0.0009 | 106.0863 | 113 | 100  | Diethanolamine                  |
| 106.0872 | 105.079 | -0.0009 | 106.0863 | 110 | 100  | Diethanolamine                  |
| 84.0822  | 102.092 | -0.0014 | 84.0808  | 328 | 50   | Betaine aldehyde cation         |
| 84.0822  | 102.092 | -0.0014 | 84.0808  | 328 | 50   | Betaine aldehyde cation         |
| 84.0822  | 102.092 | -0.0014 | 84.0808  | 273 | 50   | Betaine aldehyde cation         |
| 84.0822  | 102.092 | -0.0014 | 84.0808  | 273 | 50   | Betaine aldehyde cation         |
| 84.0822  | 102.092 | -0.0014 | 84.0808  | 197 | 53.1 | Betaine aldehyde cation         |
| 84.0822  | 102.092 | -0.0014 | 84.0808  | 194 | 46.9 | Betaine aldehyde cation         |
| 186.0588 | 163.084 | 0.0149  | 186.0737 | 140 | 90.1 | N,N-Bis(2-hydroxyethyl)glycine  |
| 186.0588 | 370.196 | 0.0467  | 186.1055 | 60  | 9.9  | Ser-His-Lys                     |
| 186.0588 | 163.084 | 0.0149  | 186.0737 | 162 | 100  | N,N-Bis(2-hydroxyethyl)glycine  |
| 118.0873 | 117.079 | -0.001  | 118.0863 | 275 | 84   | Betaine                         |
| 118.0873 | 117.079 | -0.001  | 118.0863 | 274 | 84   | Betaine                         |
| 118.0873 | 117.079 | -0.001  | 118.0863 | 274 | 84   | Betaine                         |
| 118.0873 | 117.079 | -0.001  | 118.0863 | 273 | 62.7 | Betaine                         |
| 118.0873 | 117.079 | -0.001  | 118.0863 | 273 | 62.7 | Betaine                         |
| 118.0873 | 117.079 | -0.001  | 118.0863 | 267 | 62.7 | Betaine                         |
| 118.0873 | 117.079 | -0.001  | 118.0863 | 264 | 58.7 | Betaine                         |
| 118.0873 | 117.079 | -0.001  | 118.0863 | 261 | 58.7 | Betaine                         |
| 118.0873 | 117.079 | -0.001  | 118.0863 | 259 | 58.7 | Betaine                         |
| 84.0822  | 102.092 | -0.0014 | 84.0808  | 238 | 50   | Betaine aldehyde cation         |
| 84.0822  | 102.092 | -0.0014 | 84.0808  | 238 | 50   | Betaine aldehyde cation         |
| 84.0822  | 102.092 | -0.0014 | 84.0808  | 196 | 50   | Betaine aldehyde cation         |
| 84.0822  | 102.092 | -0.0014 | 84.0808  | 196 | 50   | Betaine aldehyde cation         |
| 84.0822  | 102.092 | -0.0014 | 84.0808  | 188 | 52   | Betaine aldehyde cation         |
| 84.0822  | 102.092 | -0.0014 | 84.0808  | 186 | 48   | Betaine aldehyde cation         |
| 186.0588 | 370.196 | 0.0467  | 186.1055 | 81  | 100  | Ser-His-Lys                     |
| 148.0974 | 147     | -0.04   | 148.06   | 27  | 39.3 | O-acetyl-L-serine hydrochloride |
| 148.0974 | 147     | -0.04   | 148.06   | 21  | 30.9 | N-acetyl-DL-serine              |
| 148.0974 | 147.053 | -0.037  | 148.0604 | 20  | 29.7 | O-Acetyl-L-serine               |
| 148.0974 | 147.053 | -0.037  | 148.0604 | 140 | 100  | O-Acetyl-L-serine               |
| 148.0974 | 147.053 | -0.037  | 148.0604 | 129 | 100  | O-Acetyl-L-serine               |
| 97.0774  | 114.104 | 0.0238  | 97.1012  | 35  | 22.5 | Cyclohexanol, 4-methyl-, trans- |
| 97.0774  | 114.104 | 0.0238  | 97.1012  | 35  | 22.5 | Cyclohexanol, 4-methyl-, trans- |
| 97.0774  | 114.104 | 0.0238  | 97.1012  | 32  | 19.9 | Cyclohexanemethanol             |
| 106.0872 | 105     | 0       | 106.09   | 164 | 76.1 | Diethanolamine                  |
| 106.0872 | 105.079 | -0.0009 | 106.0863 | 124 | 17.7 | Diethanolamine                  |
| 106.0872 | 105.079 | -0.0009 | 106.0863 | 123 | 17.7 | Diethanolamine                  |
| 106.0872 | 105     | 0       | 106.09   | 158 | 75.4 | Diethanolamine                  |
| 106.0872 | 105.079 | -0.0009 | 106.0863 | 124 | 19.3 | Diethanolamine                  |
| 106.0872 | 105.079 | -0.0009 | 106.0863 | 124 | 19.3 | Diethanolamine                  |
| 148.0974 | 147.053 | -0.037  | 148.0604 | 127 | 68.7 | O-Acetyl-L-serine               |
| 148.0974 | 147.053 | -0.037  | 148.0604 | 120 | 68.7 | O-Acetyl-L-serine               |
| 148.0974 | 147.053 | -0.037  | 148.0604 | 108 | 68.7 | O-Acetyl-L-serine               |
| 106.0872 | 105     | 0       | 106.09   | 185 | 78.1 | Diethanolamine                  |
| 106.0872 | 105.079 | -0.0009 | 106.0863 | 153 | 20.9 | Diethanolamine                  |
| 106.0872 | 105.079 | -0.0009 | 106.0863 | 152 | 20.9 | Diethanolamine                  |

|          |         |         |          |     |      |                                 |
|----------|---------|---------|----------|-----|------|---------------------------------|
| 106.0872 | 105     | 0       | 106.09   | 210 | 62.1 | Diethanolamine                  |
| 106.0872 | 105.079 | -0.0009 | 106.0863 | 189 | 26.4 | Diethanolamine                  |
| 106.0872 | 105.079 | -0.0009 | 106.0863 | 188 | 26.4 | Diethanolamine                  |
| 118.0873 | 117.079 | -0.001  | 118.0863 | 231 | 93.3 | Betaine                         |
| 118.0873 | 117.079 | -0.001  | 118.0863 | 223 | 93.3 | Betaine                         |
| 118.0873 | 117.079 | -0.001  | 118.0863 | 220 | 93.3 | Betaine                         |
| 118.0873 | 117.079 | -0.001  | 118.0863 | 434 | 33.8 | Betaine                         |
| 118.0873 | 117.079 | -0.001  | 118.0863 | 431 | 33.8 | Betaine                         |
| 118.0873 | 117.079 | -0.001  | 118.0863 | 423 | 33.8 | Betaine                         |
| 118.0873 | 117.079 | -0.001  | 118.0863 | 321 | 80.7 | Betaine                         |
| 118.0873 | 117.079 | -0.001  | 118.0863 | 312 | 80.7 | Betaine                         |
| 118.0873 | 117.079 | -0.001  | 118.0863 | 296 | 80.7 | Betaine                         |
| 118.0873 | 117.079 | -0.001  | 118.0863 | 338 | 36.6 | Betaine                         |
| 118.0873 | 117.079 | -0.001  | 118.0863 | 337 | 36.6 | Betaine                         |
| 118.0873 | 117.079 | -0.001  | 118.0863 | 335 | 36.6 | Betaine                         |
| 84.0822  | 102.092 | -0.0014 | 84.0808  | 317 | 52   | Betaine aldehyde cation         |
| 84.0822  | 102.092 | -0.0014 | 84.0808  | 315 | 48   | Betaine aldehyde cation         |
| 84.0822  | 102.092 | -0.0014 | 84.0808  | 215 | 53.1 | Betaine aldehyde cation         |
| 84.0822  | 102.092 | -0.0014 | 84.0808  | 212 | 46.9 | Betaine aldehyde cation         |
| 84.0822  | 102.092 | -0.0014 | 84.0808  | 200 | 51   | Betaine aldehyde cation         |
| 84.0822  | 102.092 | -0.0014 | 84.0808  | 199 | 49   | Betaine aldehyde cation         |
| 84.0822  | 102.092 | -0.0014 | 84.0808  | 247 | 55.4 | Betaine aldehyde cation         |
| 84.0822  | 102.092 | -0.0014 | 84.0808  | 242 | 44.6 | Betaine aldehyde cation         |
| 186.0588 | 163.084 | 0.0149  | 186.0737 | 121 | 100  | N,N-Bis(2-hydroxyethyl)glycine  |
| 186.0588 | 163.084 | 0.0149  | 186.0737 | 153 | 100  | N,N-Bis(2-hydroxyethyl)glycine  |
| 148.0974 | 147     | -0.04   | 148.06   | 19  | 100  | O-acetyl-L-serine hydrochloride |
| 118.0873 | 117.079 | -0.001  | 118.0863 | 378 | 58.5 | Betaine                         |
| 118.0873 | 117.079 | -0.001  | 118.0863 | 370 | 58.5 | Betaine                         |
| 118.0873 | 117.079 | -0.001  | 118.0863 | 370 | 58.5 | Betaine                         |
| 118.0873 | 117.079 | -0.001  | 118.0863 | 244 | 41.3 | Betaine                         |
| 118.0873 | 117.079 | -0.001  | 118.0863 | 243 | 41.3 | Betaine                         |
| 118.0873 | 117.079 | -0.001  | 118.0863 | 243 | 41.3 | Betaine                         |
| 118.0873 | 117.079 | -0.001  | 118.0863 | 317 | 58.9 | Betaine                         |
| 118.0873 | 117.079 | -0.001  | 118.0863 | 315 | 58.9 | Betaine                         |
| 118.0873 | 117.079 | -0.001  | 118.0863 | 314 | 58.9 | Betaine                         |
| 106.0872 | 105     | 0       | 106.09   | 174 | 79.9 | Diethanolamine                  |
| 106.0872 | 105.079 | -0.0009 | 106.0863 | 139 | 20.1 | Diethanolamine                  |
| 106.0872 | 105.079 | -0.0009 | 106.0863 | 138 | 20.1 | Diethanolamine                  |
| 106.0872 | 105     | 0       | 106.09   | 202 | 78.9 | Diethanolamine                  |
| 106.0872 | 105.079 | -0.0009 | 106.0863 | 170 | 21.1 | Diethanolamine                  |
| 106.0872 | 105.079 | -0.0009 | 106.0863 | 170 | 21.1 | Diethanolamine                  |
| 106.0872 | 105     | 0       | 106.09   | 264 | 68.7 | Diethanolamine                  |
| 106.0872 | 105.079 | -0.0009 | 106.0863 | 244 | 31.3 | Diethanolamine                  |
| 106.0872 | 105.079 | -0.0009 | 106.0863 | 243 | 31.3 | Diethanolamine                  |
| 84.0822  | 102.092 | -0.0014 | 84.0808  | 272 | 52   | Betaine aldehyde cation         |
| 84.0822  | 102.092 | -0.0014 | 84.0808  | 270 | 48   | Betaine aldehyde cation         |
| 84.0822  | 102.092 | -0.0014 | 84.0808  | 273 | 51   | Betaine aldehyde cation         |

|          |         |         |          |     |      |                                 |
|----------|---------|---------|----------|-----|------|---------------------------------|
| 84.0822  | 102.092 | -0.0014 | 84.0808  | 272 | 49   | Betaine aldehyde cation         |
| 84.0822  | 102.092 | -0.0014 | 84.0808  | 184 | 55.4 | Betaine aldehyde cation         |
| 84.0822  | 102.092 | -0.0014 | 84.0808  | 179 | 44.6 | Betaine aldehyde cation         |
| 84.0822  | 102.092 | -0.0014 | 84.0808  | 219 | 53.1 | Betaine aldehyde cation         |
| 84.0822  | 102.092 | -0.0014 | 84.0808  | 216 | 46.9 | Betaine aldehyde cation         |
| 186.0588 | 203.091 | 0.0285  | 186.0873 | 60  | 100  | Ala-Asn                         |
| 186.0588 | 163.084 | 0.0149  | 186.0737 | 144 | 100  | N,N-Bis(2-hydroxyethyl)glycine  |
| 118.0873 | 117.079 | -0.001  | 118.0863 | 299 | 37.9 | Betaine                         |
| 118.0873 | 117.079 | -0.001  | 118.0863 | 297 | 37.9 | Betaine                         |
| 118.0873 | 117     | 0       | 118.09   | 294 | 30.5 | Betaine                         |
| 118.0873 | 117.079 | -0.001  | 118.0863 | 237 | 84.2 | Betaine                         |
| 118.0873 | 117.079 | -0.001  | 118.0863 | 236 | 84.2 | Betaine                         |
| 118.0873 | 117.079 | -0.001  | 118.0863 | 236 | 84.2 | Betaine                         |
| 118.0873 | 117.079 | -0.001  | 118.0863 | 266 | 58   | Betaine                         |
| 118.0873 | 117.079 | -0.001  | 118.0863 | 264 | 58   | Betaine                         |
| 118.0873 | 117.079 | -0.001  | 118.0863 | 261 | 58   | Betaine                         |
| 84.0822  | 102.092 | -0.0014 | 84.0808  | 245 | 51   | Betaine aldehyde cation         |
| 84.0822  | 102.092 | -0.0014 | 84.0808  | 244 | 49   | Betaine aldehyde cation         |
| 84.0822  | 102.092 | -0.0014 | 84.0808  | 246 | 51   | Betaine aldehyde cation         |
| 84.0822  | 102.092 | -0.0014 | 84.0808  | 245 | 49   | Betaine aldehyde cation         |
| 186.0588 | 163.084 | 0.0149  | 186.0737 | 154 | 91.4 | N,N-Bis(2-hydroxyethyl)glycine  |
| 186.0588 | 370.196 | 0.0467  | 186.1055 | 70  | 8.6  | Ser-His-Lys                     |
| 148.0974 | 147.053 | -0.037  | 148.0604 | 136 | 64.6 | O-Acetyl-L-serine               |
| 148.0974 | 147.053 | -0.037  | 148.0604 | 129 | 64.6 | O-Acetyl-L-serine               |
| 148.0974 | 147.053 | -0.037  | 148.0604 | 117 | 64.6 | O-Acetyl-L-serine               |
| 148.0974 | 147.053 | -0.037  | 148.0604 | 190 | 73.2 | O-Acetyl-L-serine               |
| 148.0974 | 147.053 | -0.037  | 148.0604 | 179 | 73.2 | O-Acetyl-L-serine               |
| 148.0974 | 147.053 | -0.037  | 148.0604 | 164 | 73.2 | O-Acetyl-L-serine               |
| 148.0974 | 147.053 | -0.037  | 148.0604 | 165 | 72.9 | O-Acetyl-L-serine               |
| 148.0974 | 147.053 | -0.037  | 148.0604 | 155 | 72.9 | O-Acetyl-L-serine               |
| 148.0974 | 147.053 | -0.037  | 148.0604 | 141 | 72.9 | O-Acetyl-L-serine               |
| 106.0872 | 105     | 0       | 106.09   | 203 | 75.2 | Diethanolamine                  |
| 106.0872 | 105.079 | -0.0009 | 106.0863 | 171 | 20.1 | Diethanolamine                  |
| 106.0872 | 105.079 | -0.0009 | 106.0863 | 171 | 20.1 | Diethanolamine                  |
| 106.0872 | 105     | 0       | 106.09   | 152 | 73.2 | Diethanolamine                  |
| 106.0872 | 105.079 | -0.0009 | 106.0863 | 129 | 26.8 | Diethanolamine                  |
| 106.0872 | 105.079 | -0.0009 | 106.0863 | 129 | 26.8 | Diethanolamine                  |
| 148.0974 | 147     | -0.04   | 148.06   | 39  | 100  | O-acetyl-L-serine hydrochloride |
| 148.0974 | 147     | -0.04   | 148.06   | 59  | 62.3 | O-acetyl-L-serine hydrochloride |
| 148.0974 | 147     | -0.04   | 148.06   | 44  | 37.7 | O-acetyl-L-serine hydrochloride |
| 148.0974 | 147.053 | -0.037  | 148.0604 | 102 | 100  | O-Acetyl-L-serine               |
| 106.0872 | 105     | 0       | 106.09   | 155 | 75.9 | Diethanolamine                  |
| 106.0872 | 105.079 | -0.0009 | 106.0863 | 120 | 19   | Diethanolamine                  |
| 106.0872 | 105.079 | -0.0009 | 106.0863 | 119 | 19   | Diethanolamine                  |
| 106.0872 | 105     | 0       | 106.09   | 235 | 66   | Diethanolamine                  |
| 106.0872 | 105.079 | -0.0009 | 106.0863 | 217 | 34   | Diethanolamine                  |
| 106.0872 | 105.079 | -0.0009 | 106.0863 | 216 | 34   | Diethanolamine                  |

|          |         |         |          |     |      |                                |
|----------|---------|---------|----------|-----|------|--------------------------------|
| 118.0873 | 117.079 | -0.001  | 118.0863 | 195 | 100  | Betaine                        |
| 118.0873 | 117.079 | -0.001  | 118.0863 | 3   | 100  | Betaine                        |
| 118.0873 | 117.079 | -0.001  | 118.0863 | 377 | 30.8 | Betaine                        |
| 118.0873 | 117.079 | -0.001  | 118.0863 | 376 | 30.8 | Betaine                        |
| 118.0873 | 117.079 | -0.001  | 118.0863 | 373 | 30.8 | Betaine                        |
| 118.0873 | 117.079 | -0.001  | 118.0863 | 301 | 67.5 | Betaine                        |
| 118.0873 | 117.079 | -0.001  | 118.0863 | 300 | 67.5 | Betaine                        |
| 118.0873 | 117.079 | -0.001  | 118.0863 | 296 | 67.5 | Betaine                        |
| 118.0873 | 117.079 | -0.001  | 118.0863 | 365 | 37.1 | Betaine                        |
| 118.0873 | 117.079 | -0.001  | 118.0863 | 364 | 37.1 | Betaine                        |
| 118.0873 | 117.079 | -0.001  | 118.0863 | 363 | 37.1 | Betaine                        |
| 84.0822  | 102.092 | -0.0014 | 84.0808  | 318 | 50   | Betaine aldehyde cation        |
| 84.0822  | 102.092 | -0.0014 | 84.0808  | 318 | 50   | Betaine aldehyde cation        |
| 84.0822  | 102.092 | -0.0014 | 84.0808  | 222 | 56   | Betaine aldehyde cation        |
| 84.0822  | 102.092 | -0.0014 | 84.0808  | 216 | 44   | Betaine aldehyde cation        |
| 84.0822  | 102.092 | -0.0014 | 84.0808  | 164 | 52   | Betaine aldehyde cation        |
| 84.0822  | 102.092 | -0.0014 | 84.0808  | 162 | 48   | Betaine aldehyde cation        |
| 84.0822  | 102.092 | -0.0014 | 84.0808  | 257 | 52   | Betaine aldehyde cation        |
| 84.0822  | 102.092 | -0.0014 | 84.0808  | 255 | 48   | Betaine aldehyde cation        |
| 186.0588 | 163.084 | 0.0149  | 186.0737 | 113 | 85.2 | N,N-Bis(2-hydroxyethyl)glycine |
| 186.0588 | 163.084 | 0.0149  | 186.0737 | 87  | 85.2 | N,N-Bis(2-hydroxyethyl)glycine |
| 186.0588 | 203.091 | 0.0285  | 186.0873 | 52  | 14.8 | Ala-Asn                        |
| 186.0588 | 370.196 | 0.0467  | 186.1055 | 67  | 100  | Ser-His-Lys                    |
| 186.0588 | 163.084 | 0.0149  | 186.0737 | 157 | 100  | N,N-Bis(2-hydroxyethyl)glycine |
| 148.0974 | 147.053 | -0.037  | 148.0604 | 2   | 100  | O-Acetyl-L-serine              |
| 148.0974 | 147.053 | -0.037  | 148.0604 | 2   | 100  | O-Acetyl-L-serine              |
| 148.0974 | 147.053 | -0.037  | 148.0604 | 119 | 73.2 | O-Acetyl-L-serine              |
| 148.0974 | 147.053 | -0.037  | 148.0604 | 112 | 73.2 | O-Acetyl-L-serine              |
| 148.0974 | 147.053 | -0.037  | 148.0604 | 100 | 73.2 | O-Acetyl-L-serine              |
| 148.0974 | 147.053 | -0.037  | 148.0604 | 130 | 68.7 | O-Acetyl-L-serine              |
| 148.0974 | 147.053 | -0.037  | 148.0604 | 122 | 68.7 | O-Acetyl-L-serine              |
| 148.0974 | 147.053 | -0.037  | 148.0604 | 110 | 68.7 | O-Acetyl-L-serine              |
| 106.0872 | 105.079 | -0.0009 | 106.0863 | 123 | 100  | Diethanolamine                 |
| 106.0872 | 105.079 | -0.0009 | 106.0863 | 123 | 100  | Diethanolamine                 |
| 106.0872 | 105.079 | -0.0009 | 106.0863 | 116 | 100  | Diethanolamine                 |
| 106.0872 | 105     | 0       | 106.09   | 160 | 78.9 | Diethanolamine                 |
| 106.0872 | 105.079 | -0.0009 | 106.0863 | 128 | 21.1 | Diethanolamine                 |
| 106.0872 | 105.079 | -0.0009 | 106.0863 | 127 | 21.1 | Diethanolamine                 |
| 118.0873 | 117.079 | -0.001  | 118.0863 | 258 | 82.9 | Betaine                        |
| 118.0873 | 117.079 | -0.001  | 118.0863 | 257 | 82.9 | Betaine                        |
| 118.0873 | 117.079 | -0.001  | 118.0863 | 254 | 82.9 | Betaine                        |
| 118.0873 | 117.079 | -0.001  | 118.0863 | 400 | 67.5 | Betaine                        |
| 118.0873 | 117.079 | -0.001  | 118.0863 | 393 | 67.5 | Betaine                        |
| 118.0873 | 117.079 | -0.001  | 118.0863 | 390 | 67.5 | Betaine                        |
| 118.0873 | 117     | 0       | 118.09   | 334 | 23   | Betaine                        |
| 118.0873 | 117.079 | -0.001  | 118.0863 | 334 | 23   | Betaine                        |
| 118.0873 | 117.079 | -0.001  | 118.0863 | 332 | 23   | Betaine                        |

|          |         |         |          |     |      |                                |
|----------|---------|---------|----------|-----|------|--------------------------------|
| 118.0873 | 117.079 | -0.001  | 118.0863 | 361 | 31.6 | Betaine                        |
| 118.0873 | 117.079 | -0.001  | 118.0863 | 357 | 31.6 | Betaine                        |
| 118.0873 | 117.079 | -0.001  | 118.0863 | 356 | 31.6 | Betaine                        |
| 84.0822  | 102.092 | -0.0014 | 84.0808  | 268 | 51   | Betaine aldehyde cation        |
| 84.0822  | 102.092 | -0.0014 | 84.0808  | 267 | 49   | Betaine aldehyde cation        |
| 84.0822  | 102.092 | -0.0014 | 84.0808  | 206 | 53.1 | Betaine aldehyde cation        |
| 84.0822  | 102.092 | -0.0014 | 84.0808  | 203 | 46.9 | Betaine aldehyde cation        |
| 84.0822  | 102.092 | -0.0014 | 84.0808  | 135 | 52   | Betaine aldehyde cation        |
| 84.0822  | 102.092 | -0.0014 | 84.0808  | 133 | 48   | Betaine aldehyde cation        |
| 84.0822  | 102.092 | -0.0014 | 84.0808  | 219 | 53.1 | Betaine aldehyde cation        |
| 84.0822  | 102.092 | -0.0014 | 84.0808  | 216 | 46.9 | Betaine aldehyde cation        |
| 186.0588 | 163.084 | 0.0149  | 186.0737 | 93  | 84.2 | N,N-Bis(2-hydroxyethyl)glycine |
| 186.0588 | 203.091 | 0.0285  | 186.0873 | 36  | 15.8 | Ala-Asn                        |
| 106.0872 | 105     | 0       | 106.09   | 211 | 69.8 | Diethanolamine                 |
| 106.0872 | 105.079 | -0.0009 | 106.0863 | 188 | 25.5 | Diethanolamine                 |
| 106.0872 | 105.079 | -0.0009 | 106.0863 | 186 | 25.5 | Diethanolamine                 |
| 118.0873 | 117.079 | -0.001  | 118.0863 | 385 | 45.1 | Betaine                        |
| 118.0873 | 117.079 | -0.001  | 118.0863 | 380 | 45.1 | Betaine                        |
| 118.0873 | 117.079 | -0.001  | 118.0863 | 379 | 45.1 | Betaine                        |
| 118.0873 | 117.079 | -0.001  | 118.0863 | 332 | 98.8 | Betaine                        |
| 118.0873 | 117.079 | -0.001  | 118.0863 | 330 | 98.8 | Betaine                        |
| 118.0873 | 117.079 | -0.001  | 118.0863 | 319 | 98.8 | Betaine                        |
| 118.0873 | 117.079 | -0.001  | 118.0863 | 348 | 38.2 | Betaine                        |
| 118.0873 | 117.079 | -0.001  | 118.0863 | 348 | 38.2 | Betaine                        |
| 118.0873 | 117.079 | -0.001  | 118.0863 | 344 | 38.2 | Betaine                        |
| 84.0822  | 102.092 | -0.0014 | 84.0808  | 308 | 52   | Betaine aldehyde cation        |
| 84.0822  | 102.092 | -0.0014 | 84.0808  | 306 | 48   | Betaine aldehyde cation        |
| 84.0822  | 102.092 | -0.0014 | 84.0808  | 285 | 50   | Betaine aldehyde cation        |
| 84.0822  | 102.092 | -0.0014 | 84.0808  | 285 | 50   | Betaine aldehyde cation        |
| 84.0822  | 102.092 | -0.0014 | 84.0808  | 218 | 56   | Betaine aldehyde cation        |
| 84.0822  | 102.092 | -0.0014 | 84.0808  | 212 | 44   | Betaine aldehyde cation        |
| 186.0588 | 163.084 | 0.0149  | 186.0737 | 132 | 84.2 | N,N-Bis(2-hydroxyethyl)glycine |
| 186.0588 | 163.084 | 0.0149  | 186.0737 | 101 | 84.2 | N,N-Bis(2-hydroxyethyl)glycine |
| 186.0588 | 203.091 | 0.0285  | 186.0873 | 75  | 15.8 | Ala-Asn                        |
| 186.0588 | 163.084 | 0.0149  | 186.0737 | 137 | 100  | N,N-Bis(2-hydroxyethyl)glycine |
| 148.0974 | 147.053 | -0.037  | 148.0604 | 122 | 59.4 | O-Acetyl-L-serine              |
| 148.0974 | 147.053 | -0.037  | 148.0604 | 115 | 59.4 | O-Acetyl-L-serine              |
| 148.0974 | 147.053 | -0.037  | 148.0604 | 103 | 59.4 | O-Acetyl-L-serine              |
| 148.0974 | 147.053 | -0.037  | 148.0604 | 96  | 59.9 | O-Acetyl-L-serine              |
| 148.0974 | 147.053 | -0.037  | 148.0604 | 92  | 59.9 | O-Acetyl-L-serine              |
| 148.0974 | 147.053 | -0.037  | 148.0604 | 83  | 59.9 | O-Acetyl-L-serine              |
| 106.0872 | 105     | 0       | 106.09   | 158 | 76.6 | Diethanolamine                 |
| 106.0872 | 105.079 | -0.0009 | 106.0863 | 133 | 23.4 | Diethanolamine                 |
| 106.0872 | 105.079 | -0.0009 | 106.0863 | 132 | 23.4 | Diethanolamine                 |
| 106.0872 | 105     | 0       | 106.09   | 148 | 70.2 | Diethanolamine                 |
| 106.0872 | 105.079 | -0.0009 | 106.0863 | 127 | 29.8 | Diethanolamine                 |
| 106.0872 | 105.079 | -0.0009 | 106.0863 | 126 | 29.8 | Diethanolamine                 |

|          |         |         |          |     |      |                                 |
|----------|---------|---------|----------|-----|------|---------------------------------|
| 170.0793 | 187.121 | 0.0383  | 170.1176 | 70  | 39.2 | 7-Keto-8-aminopelargonic acid   |
| 170.0793 | 187.121 | 0.0383  | 170.1176 | 65  | 31.6 | 7-Keto-8-aminopelargonic acid   |
| 170.0793 | 187.121 | 0.0383  | 170.1176 | 63  | 29.2 | 7-Keto-8-aminopelargonic acid   |
| 106.0872 | 105     | 0       | 106.09   | 189 | 76.4 | Diethanolamine                  |
| 106.0872 | 105.079 | -0.0009 | 106.0863 | 151 | 18.3 | Diethanolamine                  |
| 106.0872 | 105.079 | -0.0009 | 106.0863 | 150 | 18.3 | Diethanolamine                  |
| 118.0873 | 117.079 | -0.001  | 118.0863 | 349 | 57.7 | Betaine                         |
| 118.0873 | 117.079 | -0.001  | 118.0863 | 347 | 57.7 | Betaine                         |
| 118.0873 | 117.079 | -0.001  | 118.0863 | 342 | 57.7 | Betaine                         |
| 118.0873 | 117.079 | -0.001  | 118.0863 | 277 | 61.8 | Betaine                         |
| 118.0873 | 117.079 | -0.001  | 118.0863 | 274 | 61.8 | Betaine                         |
| 118.0873 | 117.079 | -0.001  | 118.0863 | 274 | 61.8 | Betaine                         |
| 118.0873 | 117.079 | -0.001  | 118.0863 | 364 | 58   | Betaine                         |
| 118.0873 | 117.079 | -0.001  | 118.0863 | 361 | 58   | Betaine                         |
| 118.0873 | 117.079 | -0.001  | 118.0863 | 360 | 58   | Betaine                         |
| 84.0822  | 102.092 | -0.0014 | 84.0808  | 319 | 53.1 | Betaine aldehyde cation         |
| 84.0822  | 102.092 | -0.0014 | 84.0808  | 316 | 46.9 | Betaine aldehyde cation         |
| 84.0822  | 102.092 | -0.0014 | 84.0808  | 267 | 52   | Betaine aldehyde cation         |
| 84.0822  | 102.092 | -0.0014 | 84.0808  | 265 | 48   | Betaine aldehyde cation         |
| 84.0822  | 102.092 | -0.0014 | 84.0808  | 191 | 52   | Betaine aldehyde cation         |
| 84.0822  | 102.092 | -0.0014 | 84.0808  | 189 | 48   | Betaine aldehyde cation         |
| 186.0588 | 163.084 | 0.0149  | 186.0737 | 87  | 82.2 | N,N-Bis(2-hydroxyethyl)glycine  |
| 186.0588 | 163.084 | 0.0149  | 186.0737 | 64  | 82.2 | N,N-Bis(2-hydroxyethyl)glycine  |
| 186.0588 | 203.091 | 0.0285  | 186.0873 | 43  | 17.8 | Ala-Asn                         |
| 186.0588 | 163.084 | 0.0149  | 186.0737 | 83  | 100  | N,N-Bis(2-hydroxyethyl)glycine  |
| 97.0774  | 114.104 | 0.0238  | 97.1012  | 44  | 22.9 | Cyclohexanemethanol             |
| 97.0774  | 114.104 | 0.0238  | 97.1012  | 42  | 21.1 | Cyclohexanol, 4-methyl-, trans- |
| 97.0774  | 114.104 | 0.0238  | 97.1012  | 38  | 17.8 | Cyclohexanol, 2-methyl-, trans- |
| 106.0872 | 105     | 0       | 106.09   | 166 | 75.3 | Diethanolamine                  |
| 106.0872 | 105.079 | -0.0009 | 106.0863 | 130 | 18.6 | Diethanolamine                  |
| 106.0872 | 105.079 | -0.0009 | 106.0863 | 129 | 18.6 | Diethanolamine                  |
| 106.0872 | 105     | 0       | 106.09   | 159 | 73.5 | Diethanolamine                  |
| 106.0872 | 105.079 | -0.0009 | 106.0863 | 128 | 20   | Diethanolamine                  |
| 106.0872 | 105.079 | -0.0009 | 106.0863 | 127 | 20   | Diethanolamine                  |
| 118.0873 | 117.079 | -0.001  | 118.0863 | 397 | 99   | Betaine                         |
| 118.0873 | 117.079 | -0.001  | 118.0863 | 396 | 99   | Betaine                         |
| 118.0873 | 117.079 | -0.001  | 118.0863 | 394 | 99   | Betaine                         |
| 118.0873 | 117.079 | -0.001  | 118.0863 | 323 | 98.3 | Betaine                         |
| 118.0873 | 117.079 | -0.001  | 118.0863 | 322 | 98.3 | Betaine                         |
| 118.0873 | 117.079 | -0.001  | 118.0863 | 316 | 98.3 | Betaine                         |
| 118.0873 | 117.079 | -0.001  | 118.0863 | 370 | 32.5 | Betaine                         |
| 118.0873 | 117.079 | -0.001  | 118.0863 | 368 | 32.5 | Betaine                         |
| 118.0873 | 117.079 | -0.001  | 118.0863 | 364 | 32.5 | Betaine                         |
| 84.0822  | 102.092 | -0.0014 | 84.0808  | 325 | 52   | Betaine aldehyde cation         |
| 84.0822  | 102.092 | -0.0014 | 84.0808  | 323 | 48   | Betaine aldehyde cation         |
| 84.0822  | 102.092 | -0.0014 | 84.0808  | 309 | 53.1 | Betaine aldehyde cation         |
| 84.0822  | 102.092 | -0.0014 | 84.0808  | 306 | 46.9 | Betaine aldehyde cation         |



|          |         |         |          |     |      |                                 |
|----------|---------|---------|----------|-----|------|---------------------------------|
| 84.0822  | 102.092 | -0.0014 | 84.0808  | 158 | 54.2 | Betaine aldehyde cation         |
| 84.0822  | 102.092 | -0.0014 | 84.0808  | 154 | 45.8 | Betaine aldehyde cation         |
| 84.0822  | 102.092 | -0.0014 | 84.0808  | 186 | 51   | Betaine aldehyde cation         |
| 84.0822  | 102.092 | -0.0014 | 84.0808  | 185 | 49   | Betaine aldehyde cation         |
| 186.0588 | 370.196 | 0.0467  | 186.1055 | 38  | 100  | Ser-His-Lys                     |
| 186.0588 | 163.084 | 0.0149  | 186.0737 | 141 | 100  | N,N-Bis(2-hydroxyethyl)glycine  |
| 186.0588 | 163.084 | 0.0149  | 186.0737 | 150 | 100  | N,N-Bis(2-hydroxyethyl)glycine  |
| 148.0974 | 147     | -0.04   | 148.06   | 18  | 100  | O-acetyl-L-serine hydrochloride |
| 148.0974 | 147     | -0.04   | 148.06   | 13  | 100  | O-acetyl-L-serine hydrochloride |
| 148.0974 | 147.053 | -0.037  | 148.0604 | 215 | 78.6 | O-Acetyl-L-serine               |
| 148.0974 | 147.053 | -0.037  | 148.0604 | 201 | 78.6 | O-Acetyl-L-serine               |
| 148.0974 | 147     | -0.04   | 148.06   | 184 | 21.4 | O-acetyl-L-serine hydrochloride |
| 97.0774  | 114.104 | 0.0238  | 97.1012  | 55  | 22   | Cyclohexanol, 4-methyl-, trans- |
| 97.0774  | 114.104 | 0.0238  | 97.1012  | 53  | 20.3 | Cyclohexanol, 2-methyl-, trans- |
| 97.0774  | 114.104 | 0.0238  | 97.1012  | 51  | 22   | Cyclohexanol, 4-methyl-, trans- |
| 97.0774  | 114.104 | 0.0238  | 97.1012  | 34  | 26.6 | Cyclohexanemethanol             |
| 97.0774  | 114.104 | 0.0238  | 97.1012  | 31  | 23.5 | Cyclohexanol, 1-methyl-         |
| 97.0774  | 114.104 | 0.0238  | 97.1012  | 27  | 19.9 | Cyclohexanol, 4-methyl-, trans- |
| 106.0872 | 105     | 0       | 106.09   | 157 | 78.6 | Diethanolamine                  |
| 106.0872 | 105.079 | -0.0009 | 106.0863 | 122 | 19.7 | Diethanolamine                  |
| 106.0872 | 105.079 | -0.0009 | 106.0863 | 121 | 19.7 | Diethanolamine                  |
| 106.0872 | 105     | 0       | 106.09   | 202 | 76.1 | Diethanolamine                  |
| 106.0872 | 105.079 | -0.0009 | 106.0863 | 167 | 19.1 | Diethanolamine                  |
| 106.0872 | 105.079 | -0.0009 | 106.0863 | 166 | 19.1 | Diethanolamine                  |
| 118.0873 | 117.079 | -0.001  | 118.0863 | 217 | 100  | Betaine                         |
| 118.0873 | 117.079 | -0.001  | 118.0863 | 206 | 100  | Betaine                         |
| 118.0873 | 117.079 | -0.001  | 118.0863 | 201 | 100  | Betaine                         |
| 118.0873 | 117.079 | -0.001  | 118.0863 | 413 | 50.4 | Betaine                         |
| 118.0873 | 117.079 | -0.001  | 118.0863 | 409 | 50.4 | Betaine                         |
| 118.0873 | 117.079 | -0.001  | 118.0863 | 409 | 50.4 | Betaine                         |
| 118.0873 | 117     | 0       | 118.09   | 317 | 24.9 | Betaine                         |
| 118.0873 | 117.079 | -0.001  | 118.0863 | 316 | 23.9 | Betaine                         |
| 118.0873 | 117.079 | -0.001  | 118.0863 | 316 | 23.9 | Betaine                         |
| 118.0873 | 117     | 0       | 118.09   | 354 | 25.4 | Betaine                         |
| 118.0873 | 117     | 0       | 118.09   | 351 | 22.5 | Betaine                         |
| 118.0873 | 117.079 | -0.001  | 118.0863 | 348 | 19.9 | Betaine                         |
| 84.0822  | 102.092 | -0.0014 | 84.0808  | 307 | 52   | Betaine aldehyde cation         |
| 84.0822  | 102.092 | -0.0014 | 84.0808  | 305 | 48   | Betaine aldehyde cation         |
| 84.0822  | 102.092 | -0.0014 | 84.0808  | 269 | 50   | Betaine aldehyde cation         |
| 84.0822  | 102.092 | -0.0014 | 84.0808  | 269 | 50   | Betaine aldehyde cation         |
| 84.0822  | 102.092 | -0.0014 | 84.0808  | 173 | 52   | Betaine aldehyde cation         |
| 84.0822  | 102.092 | -0.0014 | 84.0808  | 171 | 48   | Betaine aldehyde cation         |
| 186.0588 | 163.084 | 0.0149  | 186.0737 | 125 | 100  | N,N-Bis(2-hydroxyethyl)glycine  |
| 106.0872 | 105     | 0       | 106.09   | 186 | 74.1 | Diethanolamine                  |
| 106.0872 | 105.079 | -0.0009 | 106.0863 | 162 | 24.8 | Diethanolamine                  |
| 106.0872 | 105.079 | -0.0009 | 106.0863 | 161 | 24.8 | Diethanolamine                  |
| 106.0872 | 105     | 0       | 106.09   | 270 | 73.2 | Diethanolamine                  |

|          |         |         |          |     |      |                                 |
|----------|---------|---------|----------|-----|------|---------------------------------|
| 106.0872 | 105.079 | -0.0009 | 106.0863 | 246 | 24.5 | Diethanolamine                  |
| 106.0872 | 105.079 | -0.0009 | 106.0863 | 245 | 24.5 | Diethanolamine                  |
| 106.0872 | 105     | 0       | 106.09   | 157 | 80.9 | Diethanolamine                  |
| 106.0872 | 105.079 | -0.0009 | 106.0863 | 118 | 19.1 | Diethanolamine                  |
| 106.0872 | 105.079 | -0.0009 | 106.0863 | 118 | 19.1 | Diethanolamine                  |
| 118.0873 | 117.079 | -0.001  | 118.0863 | 365 | 46.3 | Betaine                         |
| 118.0873 | 117.079 | -0.001  | 118.0863 | 363 | 46.3 | Betaine                         |
| 118.0873 | 117.079 | -0.001  | 118.0863 | 361 | 46.3 | Betaine                         |
| 118.0873 | 117.079 | -0.001  | 118.0863 | 248 | 71.1 | Betaine                         |
| 118.0873 | 117.079 | -0.001  | 118.0863 | 245 | 71.1 | Betaine                         |
| 118.0873 | 117.079 | -0.001  | 118.0863 | 238 | 71.1 | Betaine                         |
| 118.0873 | 117     | 0       | 118.09   | 320 | 26.5 | Betaine                         |
| 118.0873 | 117.079 | -0.001  | 118.0863 | 319 | 25.5 | Betaine                         |
| 118.0873 | 117.079 | -0.001  | 118.0863 | 318 | 25.5 | Betaine                         |
| 84.0822  | 102.092 | -0.0014 | 84.0808  | 315 | 52   | Betaine aldehyde cation         |
| 84.0822  | 102.092 | -0.0014 | 84.0808  | 313 | 48   | Betaine aldehyde cation         |
| 84.0822  | 102.092 | -0.0014 | 84.0808  | 299 | 50   | Betaine aldehyde cation         |
| 84.0822  | 102.092 | -0.0014 | 84.0808  | 299 | 50   | Betaine aldehyde cation         |
| 84.0822  | 102.092 | -0.0014 | 84.0808  | 155 | 50   | Betaine aldehyde cation         |
| 84.0822  | 102.092 | -0.0014 | 84.0808  | 155 | 50   | Betaine aldehyde cation         |
| 148.0974 | 147     | -0.04   | 148.06   | 31  | 56   | N-acetyl-DL-serine              |
| 148.0974 | 147     | -0.04   | 148.06   | 25  | 44   | O-acetyl-L-serine hydrochloride |
| 148.0974 | 147.053 | -0.037  | 148.0604 | 116 | 73.5 | O-Acetyl-L-serine               |
| 148.0974 | 147     | -0.04   | 148.06   | 69  | 15.4 | O-acetyl-L-serine hydrochloride |
| 148.0974 | 147     | -0.04   | 148.06   | 60  | 11.2 | O-acetyl-L-serine hydrochloride |
| 148.0974 | 147.053 | -0.037  | 148.0604 | 143 | 65.7 | O-Acetyl-L-serine               |
| 148.0974 | 147.053 | -0.037  | 148.0604 | 134 | 65.7 | O-Acetyl-L-serine               |
| 148.0974 | 147     | -0.04   | 148.06   | 122 | 27.9 | O-acetyl-L-serine hydrochloride |
| 118.0873 | 117.079 | -0.001  | 118.0863 | 265 | 57.3 | Betaine                         |
| 118.0873 | 117.079 | -0.001  | 118.0863 | 265 | 57.3 | Betaine                         |
| 118.0873 | 117.079 | -0.001  | 118.0863 | 262 | 57.3 | Betaine                         |
| 84.0822  | 102.092 | -0.0014 | 84.0808  | 276 | 53.1 | Betaine aldehyde cation         |
| 84.0822  | 102.092 | -0.0014 | 84.0808  | 273 | 46.9 | Betaine aldehyde cation         |
| 84.0822  | 102.092 | -0.0014 | 84.0808  | 256 | 53.1 | Betaine aldehyde cation         |
| 84.0822  | 102.092 | -0.0014 | 84.0808  | 253 | 46.9 | Betaine aldehyde cation         |
| 84.0822  | 102.092 | -0.0014 | 84.0808  | 103 | 54.2 | Betaine aldehyde cation         |
| 84.0822  | 102.092 | -0.0014 | 84.0808  | 99  | 45.8 | Betaine aldehyde cation         |
| 84.0822  | 102.092 | -0.0014 | 84.0808  | 149 | 53.1 | Betaine aldehyde cation         |
| 84.0822  | 102.092 | -0.0014 | 84.0808  | 146 | 46.9 | Betaine aldehyde cation         |
| 186.0588 | 163.084 | 0.0149  | 186.0737 | 177 | 100  | N,N-Bis(2-hydroxyethyl)glycine  |
| 186.0588 | 163.084 | 0.0149  | 186.0737 | 152 | 92.7 | N,N-Bis(2-hydroxyethyl)glycine  |
| 186.0588 | 370.196 | 0.0467  | 186.1055 | 55  | 7.3  | Ser-His-Lys                     |
| 148.0974 | 147     | -0.04   | 148.06   | 82  | 68.7 | O-acetyl-L-serine hydrochloride |
| 148.0974 | 147     | -0.04   | 148.06   | 62  | 31.3 | O-acetyl-L-serine hydrochloride |
| 148.0974 | 147.053 | -0.037  | 148.0604 | 169 | 59.3 | O-Acetyl-L-serine               |
| 148.0974 | 147     | -0.04   | 148.06   | 158 | 40.7 | O-acetyl-L-serine hydrochloride |
| 148.0974 | 147.053 | -0.037  | 148.0604 | 155 | 59.3 | O-Acetyl-L-serine               |

|          |         |         |          |     |      |                                 |
|----------|---------|---------|----------|-----|------|---------------------------------|
| 97.0774  | 114.104 | 0.0238  | 97.1012  | 60  | 29.1 | Cyclohexanol, 1-methyl-         |
| 97.0774  | 114.104 | 0.0238  | 97.1012  | 52  | 21.7 | Cycloheptanol                   |
| 97.0774  | 114.104 | 0.0238  | 97.1012  | 47  | 17.5 | Cyclohexanol, 2-methyl-, trans- |
| 106.0872 | 105     | 0       | 106.09   | 159 | 75.9 | Diethanolamine                  |
| 106.0872 | 105.079 | -0.0009 | 106.0863 | 124 | 19   | Diethanolamine                  |
| 106.0872 | 105.079 | -0.0009 | 106.0863 | 123 | 19   | Diethanolamine                  |
| 106.0872 | 105     | 0       | 106.09   | 186 | 71.8 | Diethanolamine                  |
| 106.0872 | 105.079 | -0.0009 | 106.0863 | 161 | 21.9 | Diethanolamine                  |
| 106.0872 | 105.079 | -0.0009 | 106.0863 | 160 | 21.9 | Diethanolamine                  |
| 106.0872 | 105     | 0       | 106.09   | 157 | 78.6 | Diethanolamine                  |
| 106.0872 | 105.079 | -0.0009 | 106.0863 | 126 | 21.4 | Diethanolamine                  |
| 106.0872 | 105.079 | -0.0009 | 106.0863 | 125 | 21.4 | Diethanolamine                  |
| 118.0873 | 117.079 | -0.001  | 118.0863 | 278 | 100  | Betaine                         |
| 118.0873 | 117.079 | -0.001  | 118.0863 | 278 | 100  | Betaine                         |
| 118.0873 | 117.079 | -0.001  | 118.0863 | 276 | 100  | Betaine                         |
| 118.0873 | 117.079 | -0.001  | 118.0863 | 390 | 53.2 | Betaine                         |
| 118.0873 | 117.079 | -0.001  | 118.0863 | 387 | 53.2 | Betaine                         |
| 118.0873 | 117.079 | -0.001  | 118.0863 | 387 | 53.2 | Betaine                         |
| 118.0873 | 117.079 | -0.001  | 118.0863 | 237 | 80.8 | Betaine                         |
| 118.0873 | 117.079 | -0.001  | 118.0863 | 234 | 80.8 | Betaine                         |
| 118.0873 | 117.079 | -0.001  | 118.0863 | 233 | 80.8 | Betaine                         |
| 118.0873 | 117.079 | -0.001  | 118.0863 | 416 | 57.6 | Betaine                         |
| 118.0873 | 117.079 | -0.001  | 118.0863 | 415 | 57.6 | Betaine                         |
| 118.0873 | 117.079 | -0.001  | 118.0863 | 414 | 57.6 | Betaine                         |
| 84.0822  | 102.092 | -0.0014 | 84.0808  | 317 | 54.2 | Betaine aldehyde cation         |
| 84.0822  | 102.092 | -0.0014 | 84.0808  | 313 | 45.8 | Betaine aldehyde cation         |
| 84.0822  | 102.092 | -0.0014 | 84.0808  | 292 | 51   | Betaine aldehyde cation         |
| 84.0822  | 102.092 | -0.0014 | 84.0808  | 291 | 49   | Betaine aldehyde cation         |
| 84.0822  | 102.092 | -0.0014 | 84.0808  | 190 | 53.1 | Betaine aldehyde cation         |
| 84.0822  | 102.092 | -0.0014 | 84.0808  | 187 | 46.9 | Betaine aldehyde cation         |
| 186.0588 | 163.084 | 0.0149  | 186.0737 | 102 | 65.5 | N,N-Bis(2-hydroxyethyl)glycine  |
| 186.0588 | 163.084 | 0.0149  | 186.0737 | 95  | 65.5 | N,N-Bis(2-hydroxyethyl)glycine  |
| 186.0588 | 203.091 | 0.0285  | 186.0873 | 76  | 19.6 | Ala-Asn                         |
| 186.0588 | 163.084 | 0.0149  | 186.0737 | 148 | 100  | N,N-Bis(2-hydroxyethyl)glycine  |
| 186.0588 | 163.084 | 0.0149  | 186.0737 | 157 | 100  | N,N-Bis(2-hydroxyethyl)glycine  |
| 148.0974 | 147     | -0.04   | 148.06   | 32  | 37.6 | N-acetyl-DL-serine              |
| 148.0974 | 147     | -0.04   | 148.06   | 28  | 31.8 | O-acetyl-L-serine hydrochloride |
| 148.0974 | 147     | -0.04   | 148.06   | 27  | 30.6 | O-acetyl-L-serine hydrochloride |
| 148.0974 | 147.053 | -0.037  | 148.0604 | 177 | 69.7 | O-Acetyl-L-serine               |
| 148.0974 | 147.053 | -0.037  | 148.0604 | 168 | 69.7 | O-Acetyl-L-serine               |
| 148.0974 | 147     | -0.04   | 148.06   | 153 | 23.3 | O-acetyl-L-serine hydrochloride |
| 97.0774  | 114.104 | 0.0238  | 97.1012  | 41  | 23.3 | Cyclohexanol, 4-methyl-, trans- |
| 97.0774  | 114.104 | 0.0238  | 97.1012  | 39  | 21.5 | Cyclohexanemethanol             |
| 97.0774  | 114.104 | 0.0238  | 97.1012  | 34  | 17.3 | Cyclohexanol, 1-methyl-         |
| 106.0872 | 105     | 0       | 106.09   | 164 | 74   | Diethanolamine                  |
| 106.0872 | 105.079 | -0.0009 | 106.0863 | 124 | 17.2 | Diethanolamine                  |
| 106.0872 | 105.079 | -0.0009 | 106.0863 | 123 | 17.2 | Diethanolamine                  |

|          |         |         |          |     |      |                                 |
|----------|---------|---------|----------|-----|------|---------------------------------|
| 106.0872 | 105     | 0       | 106.09   | 154 | 78.9 | Diethanolamine                  |
| 106.0872 | 105.079 | -0.0009 | 106.0863 | 122 | 21.1 | Diethanolamine                  |
| 106.0872 | 105.079 | -0.0009 | 106.0863 | 122 | 21.1 | Diethanolamine                  |
| 106.0872 | 105.079 | -0.0009 | 106.0863 | 167 | 100  | Diethanolamine                  |
| 106.0872 | 105.079 | -0.0009 | 106.0863 | 166 | 100  | Diethanolamine                  |
| 106.0872 | 105.079 | -0.0009 | 106.0863 | 166 | 100  | Diethanolamine                  |
| 186.0588 | 163.084 | 0.0149  | 186.0737 | 170 | 100  | N,N-Bis(2-hydroxyethyl)glycine  |
| 186.0588 | 370.196 | 0.0467  | 186.1055 | 68  | 100  | Ser-His-Lys                     |
| 106.0872 | 105     | 0       | 106.09   | 170 | 75.8 | Diethanolamine                  |
| 106.0872 | 105.079 | -0.0009 | 106.0863 | 129 | 17.3 | Diethanolamine                  |
| 106.0872 | 105.079 | -0.0009 | 106.0863 | 128 | 17.3 | Diethanolamine                  |
| 106.0872 | 105     | 0       | 106.09   | 156 | 80.2 | Diethanolamine                  |
| 106.0872 | 105.079 | -0.0009 | 106.0863 | 120 | 19.8 | Diethanolamine                  |
| 106.0872 | 105.079 | -0.0009 | 106.0863 | 120 | 19.8 | Diethanolamine                  |
| 106.0872 | 105     | 0       | 106.09   | 187 | 68.4 | Diethanolamine                  |
| 106.0872 | 105.079 | -0.0009 | 106.0863 | 166 | 29.1 | Diethanolamine                  |
| 106.0872 | 105.079 | -0.0009 | 106.0863 | 164 | 29.1 | Diethanolamine                  |
| 106.0872 | 105     | 0       | 106.09   | 153 | 78.6 | Diethanolamine                  |
| 106.0872 | 105.079 | -0.0009 | 106.0863 | 122 | 21.4 | Diethanolamine                  |
| 106.0872 | 105.079 | -0.0009 | 106.0863 | 122 | 21.4 | Diethanolamine                  |
| 118.0873 | 117.079 | -0.001  | 118.0863 | 374 | 66.3 | Betaine                         |
| 118.0873 | 117.079 | -0.001  | 118.0863 | 371 | 66.3 | Betaine                         |
| 118.0873 | 117.079 | -0.001  | 118.0863 | 362 | 66.3 | Betaine                         |
| 118.0873 | 117.079 | -0.001  | 118.0863 | 333 | 30.3 | Betaine                         |
| 118.0873 | 117.079 | -0.001  | 118.0863 | 333 | 30.3 | Betaine                         |
| 118.0873 | 117     | 0       | 118.09   | 330 | 26.8 | Betaine                         |
| 84.0822  | 102.092 | -0.0014 | 84.0808  | 321 | 50   | Betaine aldehyde cation         |
| 84.0822  | 102.092 | -0.0014 | 84.0808  | 321 | 50   | Betaine aldehyde cation         |
| 84.0822  | 102.092 | -0.0014 | 84.0808  | 254 | 55.4 | Betaine aldehyde cation         |
| 84.0822  | 102.092 | -0.0014 | 84.0808  | 249 | 44.6 | Betaine aldehyde cation         |
| 84.0822  | 102.092 | -0.0014 | 84.0808  | 228 | 53.1 | Betaine aldehyde cation         |
| 84.0822  | 102.092 | -0.0014 | 84.0808  | 225 | 46.9 | Betaine aldehyde cation         |
| 170.0793 | 187.121 | 0.0383  | 170.1176 | 40  | 100  | 7-Keto-8-aminopelargonic acid   |
| 148.0974 | 147     | -0.04   | 148.06   | 15  | 100  | O-acetyl-L-serine hydrochloride |
| 148.0974 | 147.053 | -0.037  | 148.0604 | 133 | 100  | O-Acetyl-L-serine               |
| 148.0974 | 147.053 | -0.037  | 148.0604 | 127 | 100  | O-Acetyl-L-serine               |
| 84.0822  | 102.092 | -0.0014 | 84.0808  | 187 | 50   | Betaine aldehyde cation         |
| 84.0822  | 102.092 | -0.0014 | 84.0808  | 187 | 50   | Betaine aldehyde cation         |
| 84.0822  | 102.092 | -0.0014 | 84.0808  | 182 | 52   | Betaine aldehyde cation         |
| 84.0822  | 102.092 | -0.0014 | 84.0808  | 180 | 48   | Betaine aldehyde cation         |
| 84.0822  | 102.092 | -0.0014 | 84.0808  | 136 | 51   | Betaine aldehyde cation         |
| 84.0822  | 102.092 | -0.0014 | 84.0808  | 135 | 49   | Betaine aldehyde cation         |
| 118.0873 | 117.079 | -0.001  | 118.0863 | 402 | 71   | Betaine                         |
| 118.0873 | 117.079 | -0.001  | 118.0863 | 400 | 71   | Betaine                         |
| 118.0873 | 117.079 | -0.001  | 118.0863 | 391 | 71   | Betaine                         |
| 118.0873 | 117.079 | -0.001  | 118.0863 | 295 | 66   | Betaine                         |
| 118.0873 | 117.079 | -0.001  | 118.0863 | 293 | 66   | Betaine                         |

|          |         |         |          |     |      |                                 |
|----------|---------|---------|----------|-----|------|---------------------------------|
| 118.0873 | 117.079 | -0.001  | 118.0863 | 284 | 66   | Betaine                         |
| 118.0873 | 117.079 | -0.001  | 118.0863 | 332 | 98.8 | Betaine                         |
| 118.0873 | 117.079 | -0.001  | 118.0863 | 328 | 98.8 | Betaine                         |
| 118.0873 | 117.079 | -0.001  | 118.0863 | 328 | 98.8 | Betaine                         |
| 186.0588 | 370.196 | 0.0467  | 186.1055 | 61  | 100  | Ser-His-Lys                     |
| 186.0588 | 163.084 | 0.0149  | 186.0737 | 131 | 100  | N,N-Bis(2-hydroxyethyl)glycine  |
| 148.0974 | 147.053 | -0.037  | 148.0604 | 35  | 37.8 | O-Acetyl-L-serine               |
| 148.0974 | 147     | -0.04   | 148.06   | 35  | 37.8 | O-acetyl-L-serine hydrochloride |
| 148.0974 | 147.053 | -0.037  | 148.0604 | 34  | 37.8 | O-Acetyl-L-serine               |
| 148.0974 | 147.053 | -0.037  | 148.0604 | 130 | 74.9 | O-Acetyl-L-serine               |
| 148.0974 | 147.053 | -0.037  | 148.0604 | 122 | 74.9 | O-Acetyl-L-serine               |
| 148.0974 | 147.053 | -0.037  | 148.0604 | 111 | 74.9 | O-Acetyl-L-serine               |
| 148.0974 | 147.053 | -0.037  | 148.0604 | 125 | 53.4 | O-Acetyl-L-serine               |
| 148.0974 | 147.053 | -0.037  | 148.0604 | 120 | 53.4 | O-Acetyl-L-serine               |
| 148.0974 | 147.053 | -0.037  | 148.0604 | 112 | 53.4 | O-Acetyl-L-serine               |
| 97.0774  | 114.104 | 0.0238  | 97.1012  | 47  | 24.4 | Cyclohexanol, 4-methyl-, trans- |
| 97.0774  | 114.104 | 0.0238  | 97.1012  | 44  | 21.6 | Cyclohexanemethanol             |
| 97.0774  | 114.104 | 0.0238  | 97.1012  | 39  | 17.4 | Cyclohexanol, 2-methyl-, trans- |
| 106.0872 | 105     | 0       | 106.09   | 152 | 78.9 | Diethanolamine                  |
| 106.0872 | 105.079 | -0.0009 | 106.0863 | 120 | 21.1 | Diethanolamine                  |
| 106.0872 | 105.079 | -0.0009 | 106.0863 | 119 | 21.1 | Diethanolamine                  |
| 106.0872 | 105     | 0       | 106.09   | 157 | 78.2 | Diethanolamine                  |
| 106.0872 | 105.079 | -0.0009 | 106.0863 | 127 | 21.8 | Diethanolamine                  |
| 106.0872 | 105.079 | -0.0009 | 106.0863 | 127 | 21.8 | Diethanolamine                  |
| 84.0822  | 102.092 | -0.0014 | 84.0808  | 285 | 50   | Betaine aldehyde cation         |
| 84.0822  | 102.092 | -0.0014 | 84.0808  | 285 | 50   | Betaine aldehyde cation         |
| 84.0822  | 102.092 | -0.0014 | 84.0808  | 267 | 52   | Betaine aldehyde cation         |
| 84.0822  | 102.092 | -0.0014 | 84.0808  | 265 | 48   | Betaine aldehyde cation         |
| 84.0822  | 102.092 | -0.0014 | 84.0808  | 252 | 51   | Betaine aldehyde cation         |
| 84.0822  | 102.092 | -0.0014 | 84.0808  | 251 | 49   | Betaine aldehyde cation         |
| 118.0873 | 117.079 | -0.001  | 118.0863 | 390 | 38.2 | Betaine                         |
| 118.0873 | 117.079 | -0.001  | 118.0863 | 389 | 38.2 | Betaine                         |
| 118.0873 | 117.079 | -0.001  | 118.0863 | 385 | 38.2 | Betaine                         |
| 118.0873 | 117.079 | -0.001  | 118.0863 | 291 | 65.3 | Betaine                         |
| 118.0873 | 117.079 | -0.001  | 118.0863 | 288 | 65.3 | Betaine                         |
| 118.0873 | 117.079 | -0.001  | 118.0863 | 287 | 65.3 | Betaine                         |
| 118.0873 | 117.079 | -0.001  | 118.0863 | 365 | 55.7 | Betaine                         |
| 118.0873 | 117.079 | -0.001  | 118.0863 | 364 | 55.7 | Betaine                         |
| 118.0873 | 117.079 | -0.001  | 118.0863 | 359 | 55.7 | Betaine                         |
| 186.0588 | 370.196 | 0.0467  | 186.1055 | 56  | 100  | Ser-His-Lys                     |
| 186.0588 | 163.084 | 0.0149  | 186.0737 | 129 | 76.9 | N,N-Bis(2-hydroxyethyl)glycine  |
| 186.0588 | 163.084 | 0.0149  | 186.0737 | 116 | 76.9 | N,N-Bis(2-hydroxyethyl)glycine  |
| 186.0588 | 203.091 | 0.0285  | 186.0873 | 92  | 18.7 | Ala-Asn                         |
| 148.0974 | 147.053 | -0.037  | 148.0604 | 133 | 63.4 | O-Acetyl-L-serine               |
| 148.0974 | 147.053 | -0.037  | 148.0604 | 125 | 63.4 | O-Acetyl-L-serine               |
| 148.0974 | 147.053 | -0.037  | 148.0604 | 113 | 63.4 | O-Acetyl-L-serine               |
| 106.0872 | 105     | 0       | 106.09   | 158 | 75.1 | Diethanolamine                  |

|          |         |         |          |     |      |                                           |
|----------|---------|---------|----------|-----|------|-------------------------------------------|
| 106.0872 | 105.079 | -0.0009 | 106.0863 | 125 | 19.6 | Diethanolamine                            |
| 106.0872 | 105.079 | -0.0009 | 106.0863 | 124 | 19.6 | Diethanolamine                            |
| 106.0872 | 105     | 0       | 106.09   | 158 | 75.4 | Diethanolamine                            |
| 106.0872 | 105.079 | -0.0009 | 106.0863 | 124 | 19.3 | Diethanolamine                            |
| 106.0872 | 105.079 | -0.0009 | 106.0863 | 123 | 19.3 | Diethanolamine                            |
| 106.0872 | 105     | 0       | 106.09   | 154 | 78.9 | Diethanolamine                            |
| 106.0872 | 105.079 | -0.0009 | 106.0863 | 122 | 21.1 | Diethanolamine                            |
| 106.0872 | 105.079 | -0.0009 | 106.0863 | 121 | 21.1 | Diethanolamine                            |
| 84.0822  | 102.092 | -0.0014 | 84.0808  | 311 | 51   | Betaine aldehyde cation                   |
| 84.0822  | 102.092 | -0.0014 | 84.0808  | 310 | 49   | Betaine aldehyde cation                   |
| 84.0822  | 102.092 | -0.0014 | 84.0808  | 244 | 52   | Betaine aldehyde cation                   |
| 84.0822  | 102.092 | -0.0014 | 84.0808  | 242 | 48   | Betaine aldehyde cation                   |
| 118.0873 | 117.079 | -0.001  | 118.0863 | 177 | 100  | 5-Aminovaleric acid                       |
| 118.0873 | 117.079 | -0.001  | 118.0863 | 168 | 100  | 5-Aminovaleric acid                       |
| 118.0873 | 117.079 | -0.001  | 118.0863 | 416 | 98.5 | Betaine                                   |
| 118.0873 | 117.079 | -0.001  | 118.0863 | 413 | 98.5 | Betaine                                   |
| 118.0873 | 117.079 | -0.001  | 118.0863 | 410 | 98.5 | Betaine                                   |
| 118.0873 | 117.079 | -0.001  | 118.0863 | 278 | 59.1 | Betaine                                   |
| 118.0873 | 117.079 | -0.001  | 118.0863 | 274 | 59.1 | Betaine                                   |
| 118.0873 | 117.079 | -0.001  | 118.0863 | 274 | 59.1 | Betaine                                   |
| 118.0873 | 117.079 | -0.001  | 118.0863 | 340 | 48.1 | Betaine                                   |
| 118.0873 | 117.079 | -0.001  | 118.0863 | 336 | 48.1 | Betaine                                   |
| 118.0873 | 117.079 | -0.001  | 118.0863 | 335 | 48.1 | Betaine                                   |
| 186.0588 | 370.196 | 0.0467  | 186.1055 | 46  | 100  | Ser-His-Lys                               |
| 186.0588 | 163.084 | 0.0149  | 186.0737 | 153 | 91.8 | N,N-Bis(2-hydroxyethyl)glycine            |
| 186.0588 | 163.084 | 0.0149  | 186.0737 | 107 | 91.8 | N,N-Bis(2-hydroxyethyl)glycine            |
| 186.0588 | 203.091 | 0.0285  | 186.0873 | 67  | 8.2  | Ala-Asn                                   |
| 186.0588 | 163.084 | 0.0149  | 186.0737 | 140 | 100  | N,N-Bis(2-hydroxyethyl)glycine            |
| 148.0974 | 147     | -0.04   | 148.06   | 65  | 51.2 | O-acetyl-L-serine hydrochloride           |
| 148.0974 | 147     | -0.04   | 148.06   | 48  | 27.9 | O-acetyl-L-serine hydrochloride           |
| 148.0974 | 147     | -0.04   | 148.06   | 40  | 20.8 | N-acetyl-DL-serine                        |
| 148.0974 | 147.053 | -0.037  | 148.0604 | 170 | 100  | O-Acetyl-L-serine                         |
| 106.0872 | 105     | 0       | 106.09   | 159 | 75.5 | Diethanolamine                            |
| 106.0872 | 105.079 | -0.0009 | 106.0863 | 122 | 18.4 | Diethanolamine                            |
| 106.0872 | 105.079 | -0.0009 | 106.0863 | 121 | 18.4 | Diethanolamine                            |
| 106.0872 | 105     | 0       | 106.09   | 261 | 79.6 | Diethanolamine                            |
| 106.0872 | 105.079 | -0.0009 | 106.0863 | 227 | 20.4 | Diethanolamine                            |
| 106.0872 | 105.079 | -0.0009 | 106.0863 | 226 | 20.4 | Diethanolamine                            |
| 371.2746 | 370.308 | 0.041   | 371.3156 | 228 | 89.2 | Hexanedioic acid, bis(2-ethylhexyl) ester |
| 371.2746 | 370.308 | 0.041   | 371.3156 | 105 | 89.2 | Hexanedioic acid, bis(2-ethylhexyl) ester |
| 371.2746 | 370.308 | 0.041   | 371.3156 | 103 | 89.2 | Hexanedioic acid, bis(2-ethylhexyl) ester |
| 371.2746 | 370.308 | 0.041   | 371.3156 | 169 | 100  | Hexanedioic acid, bis(2-ethylhexyl) ester |

|          |         |         |          |     |      |                                               |
|----------|---------|---------|----------|-----|------|-----------------------------------------------|
| 371.2746 | 370.308 | 0.041   | 371.3156 | 153 | 100  | Hexanedioic acid, bis(2-ethylhexyl) ester     |
| 371.2746 | 370.308 | 0.041   | 371.3156 | 119 | 100  | Hexanedioic acid, bis(2-ethylhexyl) ester     |
| 371.2746 | 370.308 | 0.041   | 371.3156 | 85  | 100  | Hexanedioic acid, bis(2-ethylhexyl) ester     |
| 371.2746 | 370.308 | 0.041   | 371.3156 | 72  | 100  | Hexanedioic acid, bis(2-ethylhexyl) ester     |
| 371.2746 | 370.308 | 0.041   | 371.3156 | 40  | 100  | Hexanedioic acid, bis(2-ethylhexyl) ester     |
| 371.2746 | 370.214 | -0.0529 | 371.2217 | 56  | 100  | 17-Phenyltrilor-13,14-dihydroprostaglandin A2 |
| 371.2746 | 370.214 | -0.0529 | 371.2217 | 48  | 100  | 17-Phenyltrilor-13,14-dihydroprostaglandin A2 |
| 97.0774  | 114.104 | 0.0238  | 97.1012  | 25  | 26.2 | Cyclohexanol, 1-methyl-                       |
| 97.0774  | 114.104 | 0.0238  | 97.1012  | 15  | 18.5 | Cyclopentanemethanol, .alpha.-methyl-         |
| 97.0774  | 114.104 | 0.0238  | 97.1012  | 12  | 18.5 | Cyclopentanemethanol, .alpha.-methyl-         |
| 106.0872 | 105     | 0       | 106.09   | 159 | 79.9 | Diethanolamine                                |
| 106.0872 | 105.079 | -0.0009 | 106.0863 | 124 | 20.1 | Diethanolamine                                |
| 106.0872 | 105.079 | -0.0009 | 106.0863 | 124 | 20.1 | Diethanolamine                                |
| 84.0822  | 102.092 | -0.0014 | 84.0808  | 295 | 52   | Betaine aldehyde cation                       |
| 84.0822  | 102.092 | -0.0014 | 84.0808  | 293 | 48   | Betaine aldehyde cation                       |
| 84.0822  | 102.092 | -0.0014 | 84.0808  | 267 | 51   | Betaine aldehyde cation                       |
| 84.0822  | 102.092 | -0.0014 | 84.0808  | 266 | 49   | Betaine aldehyde cation                       |
| 84.0822  | 102.092 | -0.0014 | 84.0808  | 201 | 56   | Betaine aldehyde cation                       |
| 84.0822  | 102.092 | -0.0014 | 84.0808  | 195 | 44   | Betaine aldehyde cation                       |
| 118.0873 | 117.079 | -0.001  | 118.0863 | 371 | 62.5 | Betaine                                       |
| 118.0873 | 117.079 | -0.001  | 118.0863 | 371 | 62.5 | Betaine                                       |
| 118.0873 | 117.079 | -0.001  | 118.0863 | 360 | 62.5 | Betaine                                       |
| 118.0873 | 117.079 | -0.001  | 118.0863 | 298 | 66.5 | Betaine                                       |
| 118.0873 | 117.079 | -0.001  | 118.0863 | 297 | 66.5 | Betaine                                       |
| 118.0873 | 117.079 | -0.001  | 118.0863 | 289 | 66.5 | Betaine                                       |
| 118.0873 | 117.079 | -0.001  | 118.0863 | 315 | 58.5 | Betaine                                       |
| 118.0873 | 117.079 | -0.001  | 118.0863 | 314 | 58.5 | Betaine                                       |
| 118.0873 | 117.079 | -0.001  | 118.0863 | 313 | 58.5 | Betaine                                       |
| 186.0588 | 163.084 | 0.0149  | 186.0737 | 141 | 100  | N,N-Bis(2-hydroxyethyl)glycine                |
| 148.0974 | 147     | -0.04   | 148.06   | 20  | 31.3 | N-acetyl-DL-serine                            |
| 148.0974 | 147     | -0.04   | 148.06   | 15  | 25.2 | O-acetyl-L-serine hydrochloride               |
| 148.0974 | 147.053 | -0.037  | 148.0604 | 15  | 25.2 | O-Acetyl-L-serine                             |
| 148.0974 | 147.053 | -0.037  | 148.0604 | 143 | 100  | O-Acetyl-L-serine                             |
| 97.0774  | 114.104 | 0.0238  | 97.1012  | 39  | 25.2 | Cyclohexanemethanol                           |
| 97.0774  | 114.104 | 0.0238  | 97.1012  | 32  | 19.3 | Cyclohexanol, 1-methyl-                       |
| 97.0774  | 114.104 | 0.0238  | 97.1012  | 32  | 25.2 | Cyclohexanemethanol                           |
| 106.0872 | 105     | 0       | 106.09   | 156 | 71.7 | Diethanolamine                                |
| 106.0872 | 105.079 | -0.0009 | 106.0863 | 134 | 28.3 | Diethanolamine                                |

|          |         |         |          |     |      |                                 |
|----------|---------|---------|----------|-----|------|---------------------------------|
| 106.0872 | 105.079 | -0.0009 | 106.0863 | 133 | 28.3 | Diethanolamine                  |
| 106.0872 | 105     | 0       | 106.09   | 158 | 79.6 | Diethanolamine                  |
| 106.0872 | 105.079 | -0.0009 | 106.0863 | 124 | 20.4 | Diethanolamine                  |
| 106.0872 | 105.079 | -0.0009 | 106.0863 | 123 | 20.4 | Diethanolamine                  |
| 106.0872 | 105     | 0       | 106.09   | 230 | 76.6 | Diethanolamine                  |
| 106.0872 | 105.079 | -0.0009 | 106.0863 | 205 | 23.4 | Diethanolamine                  |
| 106.0872 | 105.079 | -0.0009 | 106.0863 | 205 | 23.4 | Diethanolamine                  |
| 84.0822  | 102.092 | -0.0014 | 84.0808  | 290 | 50   | Betaine aldehyde cation         |
| 84.0822  | 102.092 | -0.0014 | 84.0808  | 290 | 50   | Betaine aldehyde cation         |
| 84.0822  | 102.092 | -0.0014 | 84.0808  | 248 | 51   | Betaine aldehyde cation         |
| 84.0822  | 102.092 | -0.0014 | 84.0808  | 247 | 49   | Betaine aldehyde cation         |
| 84.0822  | 102.092 | -0.0014 | 84.0808  | 178 | 54.2 | Betaine aldehyde cation         |
| 84.0822  | 102.092 | -0.0014 | 84.0808  | 174 | 45.8 | Betaine aldehyde cation         |
| 118.0873 | 117.079 | -0.001  | 118.0863 | 359 | 39.7 | Betaine                         |
| 118.0873 | 117.079 | -0.001  | 118.0863 | 358 | 39.7 | Betaine                         |
| 118.0873 | 117.079 | -0.001  | 118.0863 | 357 | 39.7 | Betaine                         |
| 118.0873 | 117.079 | -0.001  | 118.0863 | 305 | 68.2 | Betaine                         |
| 118.0873 | 117.079 | -0.001  | 118.0863 | 304 | 68.2 | Betaine                         |
| 118.0873 | 117.079 | -0.001  | 118.0863 | 296 | 68.2 | Betaine                         |
| 118.0873 | 117.079 | -0.001  | 118.0863 | 315 | 47.1 | Betaine                         |
| 118.0873 | 117.079 | -0.001  | 118.0863 | 314 | 47.1 | Betaine                         |
| 118.0873 | 117.079 | -0.001  | 118.0863 | 314 | 47.1 | Betaine                         |
| 148.0974 | 147.053 | -0.037  | 148.0604 | 112 | 50.2 | O-Acetyl-L-serine               |
| 148.0974 | 147.053 | -0.037  | 148.0604 | 106 | 50.2 | O-Acetyl-L-serine               |
| 148.0974 | 147.053 | -0.037  | 148.0604 | 96  | 50.2 | O-Acetyl-L-serine               |
| 148.0974 | 147.053 | -0.037  | 148.0604 | 131 | 54.7 | O-Acetyl-L-serine               |
| 148.0974 | 147.053 | -0.037  | 148.0604 | 125 | 54.7 | O-Acetyl-L-serine               |
| 148.0974 | 147     | -0.04   | 148.06   | 118 | 35.3 | O-acetyl-L-serine hydrochloride |
| 148.0974 | 147.053 | -0.037  | 148.0604 | 184 | 70.3 | O-Acetyl-L-serine               |
| 148.0974 | 147.053 | -0.037  | 148.0604 | 169 | 70.3 | O-Acetyl-L-serine               |
| 148.0974 | 147     | -0.04   | 148.06   | 158 | 21.1 | O-acetyl-L-serine hydrochloride |
| 97.0774  | 114.104 | 0.0238  | 97.1012  | 33  | 25.4 | Cyclohexanol, 2-methyl-, trans- |
| 97.0774  | 114.104 | 0.0238  | 97.1012  | 32  | 24.5 | Cyclohexanemethanol             |
| 97.0774  | 114.104 | 0.0238  | 97.1012  | 28  | 24.5 | Cyclohexanemethanol             |
| 106.0872 | 105     | 0       | 106.09   | 151 | 78.2 | Diethanolamine                  |
| 106.0872 | 105.079 | -0.0009 | 106.0863 | 121 | 21.8 | Diethanolamine                  |
| 106.0872 | 105.079 | -0.0009 | 106.0863 | 120 | 21.8 | Diethanolamine                  |
| 106.0872 | 105.079 | -0.0009 | 106.0863 | 173 | 100  | Diethanolamine                  |
| 106.0872 | 105.079 | -0.0009 | 106.0863 | 165 | 100  | Diethanolamine                  |
| 106.0872 | 105.079 | -0.0009 | 106.0863 | 105 | 100  | Diethanolamine                  |
| 106.0872 | 105.079 | -0.0009 | 106.0863 | 105 | 100  | Diethanolamine                  |
| 106.0872 | 105.079 | -0.0009 | 106.0863 | 104 | 100  | Diethanolamine                  |
| 84.0822  | 102.092 | -0.0014 | 84.0808  | 317 | 52   | Betaine aldehyde cation         |
| 84.0822  | 102.092 | -0.0014 | 84.0808  | 315 | 48   | Betaine aldehyde cation         |
| 84.0822  | 102.092 | -0.0014 | 84.0808  | 271 | 52   | Betaine aldehyde cation         |
| 84.0822  | 102.092 | -0.0014 | 84.0808  | 269 | 48   | Betaine aldehyde cation         |
| 84.0822  | 102.092 | -0.0014 | 84.0808  | 207 | 54.2 | Betaine aldehyde cation         |



|          |         |         |          |     |      |                                 |
|----------|---------|---------|----------|-----|------|---------------------------------|
| 84.0822  | 102.092 | -0.0014 | 84.0808  | 203 | 45.8 | Betaine aldehyde cation         |
| 118.0873 | 117.079 | -0.001  | 118.0863 | 207 | 100  | Betaine                         |
| 118.0873 | 117.079 | -0.001  | 118.0863 | 397 | 50.6 | Betaine                         |
| 118.0873 | 117.079 | -0.001  | 118.0863 | 395 | 50.6 | Betaine                         |
| 118.0873 | 117.079 | -0.001  | 118.0863 | 389 | 50.6 | Betaine                         |
| 118.0873 | 117.079 | -0.001  | 118.0863 | 277 | 58.4 | Betaine                         |
| 118.0873 | 117.079 | -0.001  | 118.0863 | 274 | 58.4 | Betaine                         |
| 118.0873 | 117.079 | -0.001  | 118.0863 | 273 | 58.4 | Betaine                         |
| 118.0873 | 117.079 | -0.001  | 118.0863 | 351 | 53.1 | Betaine                         |
| 118.0873 | 117.079 | -0.001  | 118.0863 | 345 | 53.1 | Betaine                         |
| 118.0873 | 117.079 | -0.001  | 118.0863 | 345 | 53.1 | Betaine                         |
| 186.0588 | 163.084 | 0.0149  | 186.0737 | 134 | 91.1 | N,N-Bis(2-hydroxyethyl)glycine  |
| 186.0588 | 370.196 | 0.0467  | 186.1055 | 51  | 8.9  | Ser-His-Lys                     |
| 148.0974 | 147     | -0.04   | 148.06   | 26  | 24.2 | O-acetyl-L-serine hydrochloride |
| 148.0974 | 147.053 | -0.037  | 148.0604 | 25  | 23.2 | O-Acetyl-L-serine               |
| 148.0974 | 147.053 | -0.037  | 148.0604 | 25  | 23.2 | O-Acetyl-L-serine               |
| 148.0974 | 147.053 | -0.037  | 148.0604 | 41  | 32.1 | O-Acetyl-L-serine               |
| 148.0974 | 147     | -0.04   | 148.06   | 36  | 25.9 | O-acetyl-L-serine hydrochloride |
| 148.0974 | 147.053 | -0.037  | 148.0604 | 35  | 32.1 | O-Acetyl-L-serine               |
| 148.0974 | 147.053 | -0.037  | 148.0604 | 81  | 100  | O-Acetyl-L-serine               |
| 148.0974 | 147.053 | -0.037  | 148.0604 | 71  | 49   | O-Acetyl-L-serine               |
| 148.0974 | 147.053 | -0.037  | 148.0604 | 68  | 49   | O-Acetyl-L-serine               |
| 148.0974 | 147.053 | -0.037  | 148.0604 | 61  | 49   | O-Acetyl-L-serine               |
| 97.0774  | 114.104 | 0.0238  | 97.1012  | 24  | 52   | Cyclohexanol, 4-methyl-, trans- |
| 97.0774  | 114.104 | 0.0238  | 97.1012  | 22  | 48   | Cyclohexanemethanol             |
| 97.0774  | 114.104 | 0.0238  | 97.1012  | 16  | 48   | Cyclohexanemethanol             |
| 106.0872 | 105     | 0       | 106.09   | 158 | 78.3 | Diethanolamine                  |
| 106.0872 | 105.079 | -0.0009 | 106.0863 | 124 | 20.1 | Diethanolamine                  |
| 106.0872 | 105.079 | -0.0009 | 106.0863 | 124 | 20.1 | Diethanolamine                  |
| 106.0872 | 105     | 0       | 106.09   | 148 | 77.9 | Diethanolamine                  |
| 106.0872 | 105.079 | -0.0009 | 106.0863 | 119 | 22.1 | Diethanolamine                  |
| 106.0872 | 105.079 | -0.0009 | 106.0863 | 118 | 22.1 | Diethanolamine                  |
| 106.0872 | 105     | 0       | 106.09   | 214 | 75   | Diethanolamine                  |
| 106.0872 | 105.079 | -0.0009 | 106.0863 | 183 | 20.4 | Diethanolamine                  |
| 106.0872 | 105.079 | -0.0009 | 106.0863 | 182 | 20.4 | Diethanolamine                  |
| 84.0822  | 102.092 | -0.0014 | 84.0808  | 309 | 53.1 | Betaine aldehyde cation         |
| 84.0822  | 102.092 | -0.0014 | 84.0808  | 306 | 46.9 | Betaine aldehyde cation         |
| 84.0822  | 102.092 | -0.0014 | 84.0808  | 247 | 52   | Betaine aldehyde cation         |
| 84.0822  | 102.092 | -0.0014 | 84.0808  | 245 | 48   | Betaine aldehyde cation         |
| 84.0822  | 102.092 | -0.0014 | 84.0808  | 154 | 100  | Betaine aldehyde cation         |
| 84.0822  | 102.092 | -0.0014 | 84.0808  | 169 | 56.6 | Betaine aldehyde cation         |
| 84.0822  | 102.092 | -0.0014 | 84.0808  | 162 | 43.4 | Betaine aldehyde cation         |
| 118.0873 | 117.079 | -0.001  | 118.0863 | 364 | 61.1 | Betaine                         |
| 118.0873 | 117.079 | -0.001  | 118.0863 | 361 | 61.1 | Betaine                         |
| 118.0873 | 117.079 | -0.001  | 118.0863 | 359 | 61.1 | Betaine                         |
| 118.0873 | 117.079 | -0.001  | 118.0863 | 386 | 98.5 | Betaine                         |
| 118.0873 | 117.079 | -0.001  | 118.0863 | 382 | 98.5 | Betaine                         |

|          |         |         |          |     |      |                                 |
|----------|---------|---------|----------|-----|------|---------------------------------|
| 118.0873 | 117.079 | -0.001  | 118.0863 | 377 | 98.5 | Betaine                         |
| 118.0873 | 117.079 | -0.001  | 118.0863 | 281 | 66.6 | Betaine                         |
| 118.0873 | 117.079 | -0.001  | 118.0863 | 278 | 66.6 | Betaine                         |
| 118.0873 | 117.079 | -0.001  | 118.0863 | 275 | 66.6 | Betaine                         |
| 118.0873 | 117.079 | -0.001  | 118.0863 | 327 | 27.1 | Betaine                         |
| 118.0873 | 117.079 | -0.001  | 118.0863 | 326 | 27.1 | Betaine                         |
| 118.0873 | 117     | 0       | 118.09   | 325 | 25   | Betaine                         |
| 148.0974 | 147     | -0.04   | 148.06   | 9   | 50   | O-acetyl-L-serine hydrochloride |
| 148.0974 | 147     | -0.04   | 148.06   | 9   | 50   | N-acetyl-DL-serine              |
| 148.0974 | 147.053 | -0.037  | 148.0604 | 210 | 76.6 | O-Acetyl-L-serine               |
| 148.0974 | 147.053 | -0.037  | 148.0604 | 197 | 76.6 | O-Acetyl-L-serine               |
| 148.0974 | 147     | -0.04   | 148.06   | 185 | 23.4 | O-acetyl-L-serine hydrochloride |
| 148.0974 | 147.053 | -0.037  | 148.0604 | 117 | 43.7 | O-Acetyl-L-serine               |
| 148.0974 | 147.053 | -0.037  | 148.0604 | 115 | 43.7 | O-Acetyl-L-serine               |
| 148.0974 | 147     | -0.04   | 148.06   | 114 | 38.6 | O-acetyl-L-serine hydrochloride |
| 97.0774  | 114.104 | 0.0238  | 97.1012  | 20  | 100  | Cyclohexanemethanol             |
| 97.0774  | 114.104 | 0.0238  | 97.1012  | 110 | 60   | Cyclohexanemethanol             |
| 97.0774  | 114.104 | 0.0238  | 97.1012  | 107 | 60   | Cyclohexanemethanol             |
| 97.0774  | 114.104 | 0.0238  | 97.1012  | 106 | 60   | Cyclohexanemethanol             |
| 106.0872 | 105     | 0       | 106.09   | 245 | 75.7 | Diethanolamine                  |
| 106.0872 | 105.079 | -0.0009 | 106.0863 | 214 | 20.6 | Diethanolamine                  |
| 106.0872 | 105.079 | -0.0009 | 106.0863 | 212 | 20.6 | Diethanolamine                  |
| 186.0588 | 370.196 | 0.0467  | 186.1055 | 32  | 54.2 | Ser-His-Lys                     |
| 186.0588 | 370.196 | 0.0467  | 186.1055 | 28  | 45.8 | Ser-His-Lys                     |
| 148.0974 | 147.053 | -0.037  | 148.0604 | 26  | 21   | O-Acetyl-L-serine               |
| 148.0974 | 147.053 | -0.037  | 148.0604 | 26  | 21   | O-Acetyl-L-serine               |
| 148.0974 | 147     | -0.04   | 148.06   | 26  | 21   | O-acetyl-L-serine hydrochloride |
| 148.0974 | 147.053 | -0.037  | 148.0604 | 49  | 100  | O-Acetyl-L-serine               |
| 148.0974 | 147.053 | -0.037  | 148.0604 | 49  | 100  | O-Acetyl-L-serine               |
| 84.0822  | 102.092 | -0.0014 | 84.0808  | 141 | 52   | Betaine aldehyde cation         |
| 84.0822  | 102.092 | -0.0014 | 84.0808  | 139 | 48   | Betaine aldehyde cation         |
| 84.0822  | 102.092 | -0.0014 | 84.0808  | 185 | 51   | Betaine aldehyde cation         |
| 84.0822  | 102.092 | -0.0014 | 84.0808  | 184 | 49   | Betaine aldehyde cation         |
| 118.0873 | 117.079 | -0.001  | 118.0863 | 326 | 37.3 | Betaine                         |
| 118.0873 | 117.079 | -0.001  | 118.0863 | 324 | 37.3 | Betaine                         |
| 118.0873 | 117.079 | -0.001  | 118.0863 | 323 | 37.3 | Betaine                         |
| 118.0873 | 117.079 | -0.001  | 118.0863 | 272 | 61.3 | Betaine                         |
| 118.0873 | 117.079 | -0.001  | 118.0863 | 272 | 61.3 | Betaine                         |
| 118.0873 | 117.079 | -0.001  | 118.0863 | 269 | 61.3 | Betaine                         |
| 118.0873 | 117.079 | -0.001  | 118.0863 | 257 | 54.7 | Betaine                         |
| 118.0873 | 117.079 | -0.001  | 118.0863 | 257 | 54.7 | Betaine                         |
| 118.0873 | 117.079 | -0.001  | 118.0863 | 255 | 54.7 | Betaine                         |
| 186.0588 | 163.084 | 0.0149  | 186.0737 | 119 | 100  | N,N-Bis(2-hydroxyethyl)glycine  |
| 186.0588 | 370.196 | 0.0467  | 186.1055 | 55  | 100  | Ser-His-Lys                     |
| 186.0588 | 163.084 | 0.0149  | 186.0737 | 147 | 100  | N,N-Bis(2-hydroxyethyl)glycine  |
| 148.0974 | 147.053 | -0.037  | 148.0604 | 114 | 50.2 | O-Acetyl-L-serine               |
| 148.0974 | 147.053 | -0.037  | 148.0604 | 108 | 50.2 | O-Acetyl-L-serine               |

|          |         |         |          |     |      |                                           |
|----------|---------|---------|----------|-----|------|-------------------------------------------|
| 148.0974 | 147.053 | -0.037  | 148.0604 | 97  | 50.2 | O-Acetyl-L-serine                         |
| 371.2746 | 370.308 | 0.041   | 371.3156 | 194 | 70.6 | Hexanedioic acid, bis(2-ethylhexyl) ester |
| 371.2746 | 370.308 | 0.041   | 371.3156 | 138 | 70.6 | Hexanedioic acid, bis(2-ethylhexyl) ester |
| 371.2746 | 370.308 | 0.041   | 371.3156 | 136 | 70.6 | Hexanedioic acid, bis(2-ethylhexyl) ester |
| 371.2746 | 370.308 | 0.041   | 371.3156 | 170 | 78.3 | Hexanedioic acid, bis(2-ethylhexyl) ester |
| 371.2746 | 370.308 | 0.041   | 371.3156 | 149 | 78.3 | Hexanedioic acid, bis(2-ethylhexyl) ester |
| 371.2746 | 370.308 | 0.041   | 371.3156 | 109 | 78.3 | Hexanedioic acid, bis(2-ethylhexyl) ester |
| 371.2746 | 370.308 | 0.041   | 371.3156 | 80  | 100  | Hexanedioic acid, bis(2-ethylhexyl) ester |
| 371.2746 | 370.308 | 0.041   | 371.3156 | 68  | 100  | Hexanedioic acid, bis(2-ethylhexyl) ester |
| 371.2746 | 370.308 | 0.041   | 371.3156 | 54  | 100  | Hexanedioic acid, bis(2-ethylhexyl) ester |
| 371.2746 | 370.308 | 0.041   | 371.3156 | 140 | 100  | Hexanedioic acid, bis(2-ethylhexyl) ester |
| 371.2746 | 370.308 | 0.041   | 371.3156 | 122 | 100  | Hexanedioic acid, bis(2-ethylhexyl) ester |
| 371.2746 | 370.308 | 0.041   | 371.3156 | 102 | 100  | Hexanedioic acid, bis(2-ethylhexyl) ester |
| 97.0774  | 114.104 | 0.0238  | 97.1012  | 75  | 21.6 | Cyclohexanol, 1-methyl-                   |
| 97.0774  | 114.104 | 0.0238  | 97.1012  | 74  | 20.7 | Cyclopentanemethanol, .alpha.-methyl-     |
| 97.0774  | 114.104 | 0.0238  | 97.1012  | 74  | 20.7 | Cyclohexanemethanol                       |
| 106.0872 | 105     | 0       | 106.09   | 155 | 71.7 | Diethanolamine                            |
| 106.0872 | 105.079 | -0.0009 | 106.0863 | 133 | 28.3 | Diethanolamine                            |
| 106.0872 | 105.079 | -0.0009 | 106.0863 | 133 | 28.3 | Diethanolamine                            |
| 106.0872 | 105     | 0       | 106.09   | 232 | 78.2 | Diethanolamine                            |
| 106.0872 | 105.079 | -0.0009 | 106.0863 | 202 | 21.8 | Diethanolamine                            |
| 106.0872 | 105.079 | -0.0009 | 106.0863 | 201 | 21.8 | Diethanolamine                            |
| 84.0822  | 102.092 | -0.0014 | 84.0808  | 289 | 51   | Betaine aldehyde cation                   |
| 84.0822  | 102.092 | -0.0014 | 84.0808  | 288 | 49   | Betaine aldehyde cation                   |
| 84.0822  | 102.092 | -0.0014 | 84.0808  | 252 | 53.1 | Betaine aldehyde cation                   |
| 84.0822  | 102.092 | -0.0014 | 84.0808  | 249 | 46.9 | Betaine aldehyde cation                   |
| 84.0822  | 102.092 | -0.0014 | 84.0808  | 113 | 53.1 | Betaine aldehyde cation                   |
| 84.0822  | 102.092 | -0.0014 | 84.0808  | 110 | 46.9 | Betaine aldehyde cation                   |
| 118.0873 | 117.079 | -0.001  | 118.0863 | 319 | 32.2 | Betaine                                   |
| 118.0873 | 117.079 | -0.001  | 118.0863 | 318 | 32.2 | Betaine                                   |
| 118.0873 | 117.079 | -0.001  | 118.0863 | 318 | 32.2 | Betaine                                   |
| 118.0873 | 117.079 | -0.001  | 118.0863 | 276 | 61.7 | Betaine                                   |
| 118.0873 | 117.079 | -0.001  | 118.0863 | 273 | 61.7 | Betaine                                   |
| 118.0873 | 117.079 | -0.001  | 118.0863 | 272 | 61.7 | Betaine                                   |

|          |         |         |          |     |      |                                       |
|----------|---------|---------|----------|-----|------|---------------------------------------|
| 118.0873 | 117.079 | -0.001  | 118.0863 | 372 | 45.1 | Betaine                               |
| 118.0873 | 117.079 | -0.001  | 118.0863 | 370 | 45.1 | Betaine                               |
| 118.0873 | 117.079 | -0.001  | 118.0863 | 367 | 45.1 | Betaine                               |
| 186.0588 | 370.196 | 0.0467  | 186.1055 | 52  | 100  | Ser-His-Lys                           |
| 186.0588 | 203.091 | 0.0285  | 186.0873 | 75  | 100  | Ala-Asn                               |
| 148.0974 | 147     | -0.04   | 148.06   | 33  | 56   | O-acetyl-L-serine hydrochloride       |
| 148.0974 | 147     | -0.04   | 148.06   | 27  | 44   | O-acetyl-L-serine hydrochloride       |
| 148.0974 | 147.053 | -0.037  | 148.0604 | 178 | 100  | O-Acetyl-L-serine                     |
| 148.0974 | 147.053 | -0.037  | 148.0604 | 167 | 100  | O-Acetyl-L-serine                     |
| 97.0774  | 114.104 | 0.0238  | 97.1012  | 98  | 24.3 | Cyclohexanol, 4-methyl-, trans-       |
| 97.0774  | 114.104 | 0.0238  | 97.1012  | 87  | 16.6 | Cycloheptanol                         |
| 97.0774  | 114.104 | 0.0238  | 97.1012  | 87  | 16.6 | Cyclopentanemethanol, .alpha.-methyl- |
| 106.0872 | 105     | 0       | 106.09   | 154 | 74.8 | Diethanolamine                        |
| 106.0872 | 105.079 | -0.0009 | 106.0863 | 118 | 18.5 | Diethanolamine                        |
| 106.0872 | 105.079 | -0.0009 | 106.0863 | 117 | 18.5 | Diethanolamine                        |
| 106.0872 | 105     | 0       | 106.09   | 253 | 76.6 | Diethanolamine                        |
| 106.0872 | 105.079 | -0.0009 | 106.0863 | 228 | 23.4 | Diethanolamine                        |
| 106.0872 | 105.079 | -0.0009 | 106.0863 | 228 | 23.4 | Diethanolamine                        |
| 84.0822  | 102.092 | -0.0014 | 84.0808  | 300 | 55.4 | Betaine aldehyde cation               |
| 84.0822  | 102.092 | -0.0014 | 84.0808  | 295 | 44.6 | Betaine aldehyde cation               |
| 84.0822  | 102.092 | -0.0014 | 84.0808  | 253 | 53.1 | Betaine aldehyde cation               |
| 84.0822  | 102.092 | -0.0014 | 84.0808  | 250 | 46.9 | Betaine aldehyde cation               |
| 84.0822  | 102.092 | -0.0014 | 84.0808  | 228 | 55.4 | Betaine aldehyde cation               |
| 84.0822  | 102.092 | -0.0014 | 84.0808  | 223 | 44.6 | Betaine aldehyde cation               |
| 118.0873 | 117.079 | -0.001  | 118.0863 | 321 | 50.1 | Betaine                               |
| 118.0873 | 117.079 | -0.001  | 118.0863 | 320 | 50.1 | Betaine                               |
| 118.0873 | 117.079 | -0.001  | 118.0863 | 319 | 50.1 | Betaine                               |
| 118.0873 | 117.079 | -0.001  | 118.0863 | 365 | 55.6 | Betaine                               |
| 118.0873 | 117.079 | -0.001  | 118.0863 | 364 | 55.6 | Betaine                               |
| 118.0873 | 117.079 | -0.001  | 118.0863 | 361 | 55.6 | Betaine                               |
| 148.0974 | 147     | -0.04   | 148.06   | 12  | 100  | O-acetyl-L-serine hydrochloride       |
| 148.0974 | 147.053 | -0.037  | 148.0604 | 119 | 100  | O-Acetyl-L-serine                     |
| 148.0974 | 147.053 | -0.037  | 148.0604 | 112 | 100  | O-Acetyl-L-serine                     |
| 97.0774  | 114.104 | 0.0238  | 97.1012  | 70  | 52   | Cyclohexanemethanol                   |
| 97.0774  | 114.104 | 0.0238  | 97.1012  | 68  | 48   | Cyclopentanemethanol, .alpha.-methyl- |
| 97.0774  | 114.104 | 0.0238  | 97.1012  | 66  | 48   | Cyclopentanemethanol, .alpha.-methyl- |
| 106.0872 | 105     | 0       | 106.09   | 157 | 79.3 | Diethanolamine                        |
| 106.0872 | 105.079 | -0.0009 | 106.0863 | 124 | 20.7 | Diethanolamine                        |
| 106.0872 | 105.079 | -0.0009 | 106.0863 | 123 | 20.7 | Diethanolamine                        |
| 106.0872 | 105.079 | -0.0009 | 106.0863 | 111 | 100  | Diethanolamine                        |
| 106.0872 | 105.079 | -0.0009 | 106.0863 | 110 | 100  | Diethanolamine                        |
| 106.0872 | 105.079 | -0.0009 | 106.0863 | 109 | 100  | Diethanolamine                        |
| 84.0822  | 102.092 | -0.0014 | 84.0808  | 289 | 51   | Betaine aldehyde cation               |
| 84.0822  | 102.092 | -0.0014 | 84.0808  | 288 | 49   | Betaine aldehyde cation               |

|          |         |         |          |     |      |                                       |
|----------|---------|---------|----------|-----|------|---------------------------------------|
| 84.0822  | 102.092 | -0.0014 | 84.0808  | 253 | 51   | Betaine aldehyde cation               |
| 84.0822  | 102.092 | -0.0014 | 84.0808  | 252 | 49   | Betaine aldehyde cation               |
| 84.0822  | 102.092 | -0.0014 | 84.0808  | 157 | 55.4 | Betaine aldehyde cation               |
| 84.0822  | 102.092 | -0.0014 | 84.0808  | 152 | 44.6 | Betaine aldehyde cation               |
| 84.0822  | 102.092 | -0.0014 | 84.0808  | 171 | 54.2 | Betaine aldehyde cation               |
| 84.0822  | 102.092 | -0.0014 | 84.0808  | 167 | 45.8 | Betaine aldehyde cation               |
| 118.0873 | 117.079 | -0.001  | 118.0863 | 330 | 43.4 | Betaine                               |
| 118.0873 | 117.079 | -0.001  | 118.0863 | 326 | 43.4 | Betaine                               |
| 118.0873 | 117.079 | -0.001  | 118.0863 | 324 | 43.4 | Betaine                               |
| 118.0873 | 117.079 | -0.001  | 118.0863 | 272 | 72.7 | Betaine                               |
| 118.0873 | 117.079 | -0.001  | 118.0863 | 272 | 72.7 | Betaine                               |
| 118.0873 | 117.079 | -0.001  | 118.0863 | 271 | 72.7 | Betaine                               |
| 118.0873 | 117.079 | -0.001  | 118.0863 | 326 | 99   | Betaine                               |
| 118.0873 | 117.079 | -0.001  | 118.0863 | 325 | 99   | Betaine                               |
| 118.0873 | 117.079 | -0.001  | 118.0863 | 322 | 99   | Betaine                               |
| 97.0774  | 114.104 | 0.0238  | 97.1012  | 51  | 25.3 | Cyclohexanol, 1-methyl-               |
| 97.0774  | 114.104 | 0.0238  | 97.1012  | 44  | 19.4 | Cyclohexanol, 2-methyl-, trans-       |
| 97.0774  | 114.104 | 0.0238  | 97.1012  | 40  | 16.4 | Cyclopentanemethanol, .alpha.-methyl- |
| 84.0822  | 102.092 | -0.0014 | 84.0808  | 255 | 50   | Betaine aldehyde cation               |
| 84.0822  | 102.092 | -0.0014 | 84.0808  | 255 | 50   | Betaine aldehyde cation               |
| 84.0822  | 102.092 | -0.0014 | 84.0808  | 185 | 51   | Betaine aldehyde cation               |
| 84.0822  | 102.092 | -0.0014 | 84.0808  | 184 | 49   | Betaine aldehyde cation               |
| 84.0822  | 102.092 | -0.0014 | 84.0808  | 166 | 53.1 | Betaine aldehyde cation               |
| 84.0822  | 102.092 | -0.0014 | 84.0808  | 163 | 46.9 | Betaine aldehyde cation               |
| 106.0872 | 105     | 0       | 106.09   | 159 | 78.9 | Diethanolamine                        |
| 106.0872 | 105.079 | -0.0009 | 106.0863 | 127 | 21.1 | Diethanolamine                        |
| 106.0872 | 105.079 | -0.0009 | 106.0863 | 126 | 21.1 | Diethanolamine                        |
| 106.0872 | 105     | 0       | 106.09   | 180 | 67.3 | Diethanolamine                        |
| 106.0872 | 105.079 | -0.0009 | 106.0863 | 161 | 32.7 | Diethanolamine                        |
| 106.0872 | 105.079 | -0.0009 | 106.0863 | 160 | 32.7 | Diethanolamine                        |
| 186.0588 | 370.196 | 0.0467  | 186.1055 | 38  | 100  | Ser-His-Lys                           |
| 186.0588 | 370.196 | 0.0467  | 186.1055 | 68  | 100  | Ser-His-Lys                           |
| 148.0974 | 147     | -0.04   | 148.06   | 21  | 100  | O-acetyl-L-serine hydrochloride       |
| 148.0974 | 147.053 | -0.037  | 148.0604 | 140 | 100  | O-Acetyl-L-serine                     |
| 84.0822  | 102.092 | -0.0014 | 84.0808  | 168 | 51   | Betaine aldehyde cation               |
| 84.0822  | 102.092 | -0.0014 | 84.0808  | 167 | 49   | Betaine aldehyde cation               |
| 84.0822  | 102.092 | -0.0014 | 84.0808  | 149 | 50   | Betaine aldehyde cation               |
| 84.0822  | 102.092 | -0.0014 | 84.0808  | 149 | 50   | Betaine aldehyde cation               |
| 84.0822  | 102.092 | -0.0014 | 84.0808  | 147 | 52   | Betaine aldehyde cation               |
| 84.0822  | 102.092 | -0.0014 | 84.0808  | 145 | 48   | Betaine aldehyde cation               |
| 186.0588 | 370.196 | 0.0467  | 186.1055 | 73  | 100  | Ser-His-Lys                           |
| 118.0873 | 117.079 | -0.001  | 118.0863 | 213 | 100  | Betaine                               |
| 118.0873 | 117.079 | -0.001  | 118.0863 | 212 | 100  | Betaine                               |
| 118.0873 | 117.079 | -0.001  | 118.0863 | 211 | 100  | Betaine                               |
| 121.1229 | 60.032  | -0.051  | 121.072  | 21  | 64.7 | Urea                                  |
| 121.1229 | 60.032  | -0.051  | 121.072  | 20  | 64.7 | Urea                                  |

|          |         |         |          |     |      |                         |
|----------|---------|---------|----------|-----|------|-------------------------|
| 121.1229 | 60.032  | -0.051  | 121.072  | 20  | 64.7 | Urea                    |
| 121.1229 | 60.032  | -0.051  | 121.072  | 37  | 78.9 | Urea                    |
| 121.1229 | 60.032  | -0.051  | 121.072  | 30  | 78.9 | Urea                    |
| 121.1229 | 60.032  | -0.051  | 121.072  | 24  | 78.9 | Urea                    |
| 121.1229 | 60.058  | -0.0006 | 121.1223 | 2   | 100  | 1-Propanol              |
| 121.1229 | 60.032  | -0.051  | 121.072  | 44  | 81.7 | Urea                    |
| 121.1229 | 60.032  | -0.051  | 121.072  | 37  | 81.7 | Urea                    |
| 121.1229 | 60.032  | -0.051  | 121.072  | 27  | 81.7 | Urea                    |
| 84.0822  | 102.092 | -0.0014 | 84.0808  | 247 | 51   | Betaine aldehyde cation |
| 84.0822  | 102.092 | -0.0014 | 84.0808  | 246 | 49   | Betaine aldehyde cation |
| 84.0822  | 102.092 | -0.0014 | 84.0808  | 184 | 52   | Betaine aldehyde cation |
| 84.0822  | 102.092 | -0.0014 | 84.0808  | 182 | 48   | Betaine aldehyde cation |
| 84.0822  | 102.092 | -0.0014 | 84.0808  | 200 | 53.1 | Betaine aldehyde cation |
| 84.0822  | 102.092 | -0.0014 | 84.0808  | 197 | 46.9 | Betaine aldehyde cation |
| 106.0872 | 105     | 0       | 106.09   | 151 | 75.3 | Diethanolamine          |
| 106.0872 | 105.079 | -0.0009 | 106.0863 | 114 | 18.3 | Diethanolamine          |
| 106.0872 | 105.079 | -0.0009 | 106.0863 | 113 | 18.3 | Diethanolamine          |
| 106.0872 | 105.079 | -0.0009 | 106.0863 | 125 | 100  | Diethanolamine          |
| 106.0872 | 105.079 | -0.0009 | 106.0863 | 124 | 100  | Diethanolamine          |
| 106.0872 | 105.079 | -0.0009 | 106.0863 | 118 | 100  | Diethanolamine          |
| 106.0872 | 105     | 0       | 106.09   | 218 | 77.3 | Diethanolamine          |
| 106.0872 | 105.079 | -0.0009 | 106.0863 | 191 | 22.7 | Diethanolamine          |
| 106.0872 | 105.079 | -0.0009 | 106.0863 | 190 | 22.7 | Diethanolamine          |
| 148.0974 | 147.053 | -0.037  | 148.0604 | 89  | 69.5 | O-Acetyl-L-serine       |
| 148.0974 | 147.053 | -0.037  | 148.0604 | 85  | 69.5 | O-Acetyl-L-serine       |
| 148.0974 | 147.053 | -0.037  | 148.0604 | 78  | 69.5 | O-Acetyl-L-serine       |
| 121.1229 | 60.032  | -0.051  | 121.072  | 29  | 77.9 | Urea                    |
| 121.1229 | 60.032  | -0.051  | 121.072  | 28  | 77.9 | Urea                    |
| 121.1229 | 60.032  | -0.051  | 121.072  | 27  | 77.9 | Urea                    |
| 121.1229 | 60.032  | -0.051  | 121.072  | 31  | 78.2 | Urea                    |
| 121.1229 | 60.032  | -0.051  | 121.072  | 25  | 78.2 | Urea                    |
| 121.1229 | 60.032  | -0.051  | 121.072  | 20  | 78.2 | Urea                    |
| 121.1229 | 60.058  | -0.0006 | 121.1223 | 10  | 100  | 1-Propanol              |
| 121.1229 | 60.058  | -0.0006 | 121.1223 | 8   | 100  | 1-Propanol              |
| 121.1229 | 60.058  | -0.0006 | 121.1223 | 8   | 100  | 1-Propanol              |
| 121.1229 | 60.032  | -0.051  | 121.072  | 73  | 83.2 | Urea                    |
| 121.1229 | 60.032  | -0.051  | 121.072  | 64  | 83.2 | Urea                    |
| 121.1229 | 60.032  | -0.051  | 121.072  | 53  | 83.2 | Urea                    |
| 228.1067 | 227.12  | 0.021   | 228.1277 | 146 | 100  | Ametryn                 |
| 228.1067 | 227.12  | 0.021   | 228.1277 | 111 | 100  | Ametryn                 |
| 228.1067 | 227.12  | 0.021   | 228.1277 | 99  | 100  | Ametryn                 |
| 84.0822  | 102.092 | -0.0014 | 84.0808  | 237 | 53.1 | Betaine aldehyde cation |
| 84.0822  | 102.092 | -0.0014 | 84.0808  | 234 | 46.9 | Betaine aldehyde cation |
| 84.0822  | 102.092 | -0.0014 | 84.0808  | 185 | 51   | Betaine aldehyde cation |
| 84.0822  | 102.092 | -0.0014 | 84.0808  | 184 | 49   | Betaine aldehyde cation |
| 84.0822  | 102.092 | -0.0014 | 84.0808  | 190 | 51   | Betaine aldehyde cation |
| 84.0822  | 102.092 | -0.0014 | 84.0808  | 189 | 49   | Betaine aldehyde cation |

|          |         |         |          |     |      |                                 |
|----------|---------|---------|----------|-----|------|---------------------------------|
| 106.0872 | 105     | 0       | 106.09   | 160 | 75.3 | Diethanolamine                  |
| 106.0872 | 105.079 | -0.0009 | 106.0863 | 122 | 18   | Diethanolamine                  |
| 106.0872 | 105.079 | -0.0009 | 106.0863 | 122 | 18   | Diethanolamine                  |
| 106.0872 | 105     | 0       | 106.09   | 159 | 75.5 | Diethanolamine                  |
| 106.0872 | 105.079 | -0.0009 | 106.0863 | 125 | 19.4 | Diethanolamine                  |
| 106.0872 | 105.079 | -0.0009 | 106.0863 | 124 | 19.4 | Diethanolamine                  |
| 106.0872 | 105     | 0       | 106.09   | 159 | 74.3 | Diethanolamine                  |
| 106.0872 | 105.079 | -0.0009 | 106.0863 | 129 | 20.6 | Diethanolamine                  |
| 106.0872 | 105.079 | -0.0009 | 106.0863 | 128 | 20.6 | Diethanolamine                  |
| 121.1229 | 60.032  | -0.051  | 121.072  | 26  | 76.9 | Urea                            |
| 121.1229 | 60.032  | -0.051  | 121.072  | 24  | 76.9 | Urea                            |
| 121.1229 | 60.032  | -0.051  | 121.072  | 23  | 76.9 | Urea                            |
| 121.1229 | 60.032  | -0.051  | 121.072  | 38  | 68.7 | Urea                            |
| 121.1229 | 60.032  | -0.051  | 121.072  | 32  | 68.7 | Urea                            |
| 121.1229 | 60.032  | -0.051  | 121.072  | 25  | 68.7 | Urea                            |
| 121.1229 | 60.032  | -0.051  | 121.072  | 64  | 85.6 | Urea                            |
| 121.1229 | 60.032  | -0.051  | 121.072  | 59  | 85.6 | Urea                            |
| 121.1229 | 60.032  | -0.051  | 121.072  | 58  | 85.6 | Urea                            |
| 228.1067 | 227.12  | 0.021   | 228.1277 | 67  | 100  | Ametryn                         |
| 84.0822  | 102.092 | -0.0014 | 84.0808  | 262 | 52   | Betaine aldehyde cation         |
| 84.0822  | 102.092 | -0.0014 | 84.0808  | 260 | 48   | Betaine aldehyde cation         |
| 84.0822  | 102.092 | -0.0014 | 84.0808  | 219 | 51   | Betaine aldehyde cation         |
| 84.0822  | 102.092 | -0.0014 | 84.0808  | 218 | 49   | Betaine aldehyde cation         |
| 84.0822  | 102.092 | -0.0014 | 84.0808  | 132 | 51   | Betaine aldehyde cation         |
| 84.0822  | 102.092 | -0.0014 | 84.0808  | 131 | 49   | Betaine aldehyde cation         |
| 106.0872 | 105     | 0       | 106.09   | 169 | 76   | Diethanolamine                  |
| 106.0872 | 105.079 | -0.0009 | 106.0863 | 128 | 17.3 | Diethanolamine                  |
| 106.0872 | 105.079 | -0.0009 | 106.0863 | 127 | 17.3 | Diethanolamine                  |
| 106.0872 | 105     | 0       | 106.09   | 151 | 76.6 | Diethanolamine                  |
| 106.0872 | 105.079 | -0.0009 | 106.0863 | 126 | 23.4 | Diethanolamine                  |
| 106.0872 | 105.079 | -0.0009 | 106.0863 | 126 | 23.4 | Diethanolamine                  |
| 106.0872 | 105     | 0       | 106.09   | 200 | 64.3 | Diethanolamine                  |
| 106.0872 | 105.079 | -0.0009 | 106.0863 | 178 | 25.4 | Diethanolamine                  |
| 106.0872 | 105.079 | -0.0009 | 106.0863 | 177 | 25.4 | Diethanolamine                  |
| 148.0974 | 147     | -0.04   | 148.06   | 59  | 51   | O-acetyl-L-serine hydrochloride |
| 148.0974 | 147     | -0.04   | 148.06   | 58  | 49   | N-acetyl-DL-serine              |
| 148.0974 | 147.053 | -0.037  | 148.0604 | 149 | 100  | O-Acetyl-L-serine               |
| 148.0974 | 147.053 | -0.037  | 148.0604 | 139 | 100  | O-Acetyl-L-serine               |
| 148.0974 | 147.053 | -0.037  | 148.0604 | 120 | 100  | O-Acetyl-L-serine               |
| 148.0974 | 147.053 | -0.037  | 148.0604 | 113 | 100  | O-Acetyl-L-serine               |
| 148.0974 | 147.053 | -0.037  | 148.0604 | 102 | 100  | O-Acetyl-L-serine               |
| 103.1124 | 102.068 | -0.037  | 103.0754 | 114 | 82.4 | Pentanoic acid                  |
| 103.1124 | 102.068 | -0.037  | 103.0754 | 107 | 82.4 | Pentanoic acid                  |
| 103.1124 | 102.068 | -0.037  | 103.0754 | 79  | 82.4 | Pentanoic acid                  |
| 103.1124 | 102.068 | -0.037  | 103.0754 | 64  | 100  | Pentanoic acid                  |
| 103.1124 | 102.068 | -0.037  | 103.0754 | 56  | 100  | Pentanoic acid                  |
| 103.1124 | 102.068 | -0.037  | 103.0754 | 40  | 100  | Pentanoic acid                  |

|          |         |         |          |     |      |                                 |
|----------|---------|---------|----------|-----|------|---------------------------------|
| 121.1229 | 60.032  | -0.051  | 121.072  | 58  | 80.9 | Urea                            |
| 121.1229 | 60.032  | -0.051  | 121.072  | 55  | 80.9 | Urea                            |
| 121.1229 | 60.032  | -0.051  | 121.072  | 54  | 80.9 | Urea                            |
| 121.1229 | 60.032  | -0.051  | 121.072  | 67  | 83.1 | Urea                            |
| 121.1229 | 60.032  | -0.051  | 121.072  | 59  | 83.1 | Urea                            |
| 121.1229 | 60.032  | -0.051  | 121.072  | 48  | 83.1 | Urea                            |
| 121.1229 | 60.058  | -0.0006 | 121.1223 | 2   | 100  | 1-Propanol                      |
| 121.1229 | 60.058  | -0.0006 | 121.1223 | 2   | 100  | 1-Propanol                      |
| 121.1229 | 60.058  | -0.0006 | 121.1223 | 1   | 100  | 1-Propanol                      |
| 148.0974 | 147     | -0.04   | 148.06   | 64  | 54.2 | O-acetyl-L-serine hydrochloride |
| 148.0974 | 147     | -0.04   | 148.06   | 60  | 45.8 | O-acetyl-L-serine hydrochloride |
| 103.1124 | 102.068 | -0.037  | 103.0754 | 204 | 77.3 | Pentanoic acid                  |
| 103.1124 | 102.068 | -0.037  | 103.0754 | 202 | 77.3 | Pentanoic acid                  |
| 103.1124 | 102.116 | 0.011   | 103.123  | 177 | 22.7 | 1,5-Pentanediamine              |
| 103.1124 | 102.116 | 0.011   | 103.123  | 166 | 52   | 1,5-Pentanediamine              |
| 103.1124 | 102.116 | 0.011   | 103.123  | 165 | 52   | 1,5-Pentanediamine              |
| 103.1124 | 102.068 | -0.037  | 103.0754 | 164 | 48   | Pentanoic acid                  |
| 186.0588 | 163.084 | 0.0149  | 186.0737 | 157 | 100  | N,N-Bis(2-hydroxyethyl)glycine  |
| 186.0588 | 163.084 | 0.0149  | 186.0737 | 108 | 100  | N,N-Bis(2-hydroxyethyl)glycine  |
| 84.0822  | 102.092 | -0.0014 | 84.0808  | 257 | 54.2 | Betaine aldehyde cation         |
| 84.0822  | 102.092 | -0.0014 | 84.0808  | 253 | 45.8 | Betaine aldehyde cation         |
| 84.0822  | 102.092 | -0.0014 | 84.0808  | 187 | 52   | Betaine aldehyde cation         |
| 84.0822  | 102.092 | -0.0014 | 84.0808  | 185 | 48   | Betaine aldehyde cation         |
| 84.0822  | 102.092 | -0.0014 | 84.0808  | 197 | 55.4 | Betaine aldehyde cation         |
| 84.0822  | 102.092 | -0.0014 | 84.0808  | 192 | 44.6 | Betaine aldehyde cation         |
| 106.0872 | 105     | 0       | 106.09   | 159 | 73.7 | Diethanolamine                  |
| 106.0872 | 105.079 | -0.0009 | 106.0863 | 127 | 19.7 | Diethanolamine                  |
| 106.0872 | 105.079 | -0.0009 | 106.0863 | 127 | 19.7 | Diethanolamine                  |
| 106.0872 | 105     | 0       | 106.09   | 171 | 72.3 | Diethanolamine                  |
| 106.0872 | 105.079 | -0.0009 | 106.0863 | 146 | 22   | Diethanolamine                  |
| 106.0872 | 105.079 | -0.0009 | 106.0863 | 145 | 22   | Diethanolamine                  |
| 106.0872 | 105     | 0       | 106.09   | 201 | 62.3 | Diethanolamine                  |
| 106.0872 | 105.079 | -0.0009 | 106.0863 | 186 | 37.7 | Diethanolamine                  |
| 106.0872 | 105.079 | -0.0009 | 106.0863 | 184 | 37.7 | Diethanolamine                  |
| 121.1229 | 60.032  | -0.051  | 121.072  | 20  | 68.7 | Urea                            |
| 121.1229 | 60.032  | -0.051  | 121.072  | 19  | 68.7 | Urea                            |
| 121.1229 | 60.032  | -0.051  | 121.072  | 18  | 68.7 | Urea                            |
| 121.1229 | 60.032  | -0.051  | 121.072  | 28  | 77.6 | Urea                            |
| 121.1229 | 60.032  | -0.051  | 121.072  | 25  | 77.6 | Urea                            |
| 121.1229 | 60.032  | -0.051  | 121.072  | 23  | 77.6 | Urea                            |
| 121.1229 | 60.058  | -0.0006 | 121.1223 | 2   | 100  | 1-Propanol                      |
| 121.1229 | 60.058  | -0.0006 | 121.1223 | 1   | 100  | 1-Propanol                      |
| 121.1229 | 60.058  | -0.0006 | 121.1223 | 1   | 100  | 1-Propanol                      |
| 121.1229 | 60.058  | -0.0006 | 121.1223 | 1   | 100  | 1-Propanol                      |
| 121.1229 | 60.058  | -0.0006 | 121.1223 | 1   | 100  | 1-Propanol                      |
| 121.1229 | 60.058  | -0.0006 | 121.1223 | 1   | 100  | 1-Propanol                      |
| 228.1067 | 227.12  | 0.021   | 228.1277 | 116 | 100  | Ametryn                         |



|          |         |         |          |     |      |                                       |
|----------|---------|---------|----------|-----|------|---------------------------------------|
| 228.1067 | 227.12  | 0.021   | 228.1277 | 87  | 100  | Ametryn                               |
| 228.1067 | 227.12  | 0.021   | 228.1277 | 82  | 100  | Ametryn                               |
| 103.1124 | 102.068 | -0.037  | 103.0754 | 195 | 78.2 | Pentanoic acid                        |
| 103.1124 | 102.068 | -0.037  | 103.0754 | 180 | 78.2 | Pentanoic acid                        |
| 103.1124 | 102.116 | 0.011   | 103.123  | 165 | 21.8 | 1,5-Pentanediamine                    |
| 103.1124 | 102.116 | 0.011   | 103.123  | 218 | 100  | 1,5-Pentanediamine                    |
| 103.1124 | 102.116 | 0.011   | 103.123  | 215 | 100  | 1,5-Pentanediamine                    |
| 103.1124 | 102.116 | 0.011   | 103.123  | 213 | 100  | 1,5-Pentanediamine                    |
| 103.1124 | 102.116 | 0.011   | 103.123  | 216 | 100  | 1,5-Pentanediamine                    |
| 103.1124 | 102.116 | 0.011   | 103.123  | 214 | 100  | 1,5-Pentanediamine                    |
| 103.1124 | 102.116 | 0.011   | 103.123  | 211 | 100  | 1,5-Pentanediamine                    |
| 106.0872 | 105     | 0       | 106.09   | 158 | 79.3 | Diethanolamine                        |
| 106.0872 | 105.079 | -0.0009 | 106.0863 | 125 | 20.7 | Diethanolamine                        |
| 106.0872 | 105.079 | -0.0009 | 106.0863 | 124 | 20.7 | Diethanolamine                        |
| 106.0872 | 105     | 0       | 106.09   | 151 | 78.9 | Diethanolamine                        |
| 106.0872 | 105.079 | -0.0009 | 106.0863 | 119 | 21.1 | Diethanolamine                        |
| 106.0872 | 105.079 | -0.0009 | 106.0863 | 118 | 21.1 | Diethanolamine                        |
| 121.1229 | 60.032  | -0.051  | 121.072  | 20  | 63.5 | Urea                                  |
| 121.1229 | 60.032  | -0.051  | 121.072  | 18  | 63.5 | Urea                                  |
| 121.1229 | 60.032  | -0.051  | 121.072  | 16  | 63.5 | Urea                                  |
| 121.1229 | 60.032  | -0.051  | 121.072  | 45  | 82.2 | Urea                                  |
| 121.1229 | 60.032  | -0.051  | 121.072  | 38  | 82.2 | Urea                                  |
| 121.1229 | 60.032  | -0.051  | 121.072  | 31  | 82.2 | Urea                                  |
| 121.1229 | 60.058  | -0.0006 | 121.1223 | 2   | 100  | 1-Propanol                            |
| 121.1229 | 60.058  | -0.0006 | 121.1223 | 1   | 100  | 1-Propanol                            |
| 121.1229 | 60.058  | -0.0006 | 121.1223 | 1   | 100  | 1-Propanol                            |
| 121.1229 | 60.032  | -0.051  | 121.072  | 59  | 84   | Urea                                  |
| 121.1229 | 60.032  | -0.051  | 121.072  | 51  | 84   | Urea                                  |
| 121.1229 | 60.058  | -0.0006 | 121.1223 | 3   | 16   | 1-Propanol                            |
| 148.0974 | 147.053 | -0.037  | 148.0604 | 117 | 53.2 | O-Acetyl-L-serine                     |
| 148.0974 | 147.053 | -0.037  | 148.0604 | 109 | 53.2 | O-Acetyl-L-serine                     |
| 148.0974 | 147     | -0.04   | 148.06   | 107 | 37.5 | O-acetyl-L-serine hydrochloride       |
| 148.0974 | 147.053 | -0.037  | 148.0604 | 156 | 77.3 | O-Acetyl-L-serine                     |
| 148.0974 | 147.053 | -0.037  | 148.0604 | 143 | 77.3 | O-Acetyl-L-serine                     |
| 148.0974 | 147.053 | -0.037  | 148.0604 | 133 | 77.3 | O-Acetyl-L-serine                     |
| 148.0974 | 147.053 | -0.037  | 148.0604 | 177 | 71.9 | O-Acetyl-L-serine                     |
| 148.0974 | 147.053 | -0.037  | 148.0604 | 165 | 71.9 | O-Acetyl-L-serine                     |
| 148.0974 | 147     | -0.04   | 148.06   | 151 | 21.5 | O-acetyl-L-serine hydrochloride       |
| 97.0774  | 114.104 | 0.0238  | 97.1012  | 7   | 100  | Cyclopentanemethanol, .alpha.-methyl- |
| 84.0822  | 102.092 | -0.0014 | 84.0808  | 277 | 50   | Betaine aldehyde cation               |
| 84.0822  | 102.092 | -0.0014 | 84.0808  | 277 | 50   | Betaine aldehyde cation               |
| 84.0822  | 102.092 | -0.0014 | 84.0808  | 205 | 51   | Betaine aldehyde cation               |
| 84.0822  | 102.092 | -0.0014 | 84.0808  | 204 | 49   | Betaine aldehyde cation               |
| 84.0822  | 102.092 | -0.0014 | 84.0808  | 164 | 54.2 | Betaine aldehyde cation               |
| 84.0822  | 102.092 | -0.0014 | 84.0808  | 160 | 45.8 | Betaine aldehyde cation               |
| 84.0822  | 102.092 | -0.0014 | 84.0808  | 148 | 51   | Betaine aldehyde cation               |

|          |         |         |          |     |      |                                 |
|----------|---------|---------|----------|-----|------|---------------------------------|
| 84.0822  | 102.092 | -0.0014 | 84.0808  | 147 | 49   | Betaine aldehyde cation         |
| 106.0872 | 105     | 0       | 106.09   | 193 | 73.4 | Diethanolamine                  |
| 106.0872 | 105.079 | -0.0009 | 106.0863 | 165 | 21.2 | Diethanolamine                  |
| 106.0872 | 105.079 | -0.0009 | 106.0863 | 164 | 21.2 | Diethanolamine                  |
| 106.0872 | 105     | 0       | 106.09   | 157 | 73.9 | Diethanolamine                  |
| 106.0872 | 105.079 | -0.0009 | 106.0863 | 126 | 20.1 | Diethanolamine                  |
| 106.0872 | 105.079 | -0.0009 | 106.0863 | 126 | 20.1 | Diethanolamine                  |
| 106.0872 | 105.079 | -0.0009 | 106.0863 | 128 | 100  | Diethanolamine                  |
| 106.0872 | 105.079 | -0.0009 | 106.0863 | 127 | 100  | Diethanolamine                  |
| 106.0872 | 105.079 | -0.0009 | 106.0863 | 126 | 100  | Diethanolamine                  |
| 103.1124 | 102.116 | 0.011   | 103.123  | 106 | 73.2 | 1,5-Pentanediamine              |
| 103.1124 | 102.116 | 0.011   | 103.123  | 103 | 73.2 | 1,5-Pentanediamine              |
| 103.1124 | 102.116 | 0.011   | 103.123  | 103 | 73.2 | 1,5-Pentanediamine              |
| 84.0822  | 102.092 | -0.0014 | 84.0808  | 194 | 53.1 | Betaine aldehyde cation         |
| 84.0822  | 102.092 | -0.0014 | 84.0808  | 191 | 46.9 | Betaine aldehyde cation         |
| 84.0822  | 102.092 | -0.0014 | 84.0808  | 192 | 51   | Betaine aldehyde cation         |
| 84.0822  | 102.092 | -0.0014 | 84.0808  | 191 | 49   | Betaine aldehyde cation         |
| 84.0822  | 102.092 | -0.0014 | 84.0808  | 134 | 51   | Betaine aldehyde cation         |
| 84.0822  | 102.092 | -0.0014 | 84.0808  | 133 | 49   | Betaine aldehyde cation         |
| 121.1229 | 60.032  | -0.051  | 121.072  | 26  | 71.7 | Urea                            |
| 121.1229 | 60.032  | -0.051  | 121.072  | 24  | 71.7 | Urea                            |
| 121.1229 | 60.032  | -0.051  | 121.072  | 21  | 71.7 | Urea                            |
| 121.1229 | 60.032  | -0.051  | 121.072  | 38  | 77.3 | Urea                            |
| 121.1229 | 60.032  | -0.051  | 121.072  | 34  | 77.3 | Urea                            |
| 121.1229 | 60.032  | -0.051  | 121.072  | 32  | 77.3 | Urea                            |
| 121.1229 | 60.058  | -0.0006 | 121.1223 | 3   | 100  | 1-Propanol                      |
| 121.1229 | 60.058  | -0.0006 | 121.1223 | 2   | 100  | 1-Propanol                      |
| 121.1229 | 60.058  | -0.0006 | 121.1223 | 2   | 100  | 1-Propanol                      |
| 121.1229 | 60.032  | -0.051  | 121.072  | 38  | 80.2 | Urea                            |
| 121.1229 | 60.032  | -0.051  | 121.072  | 31  | 80.2 | Urea                            |
| 121.1229 | 60.032  | -0.051  | 121.072  | 23  | 80.2 | Urea                            |
| 148.0974 | 147.053 | -0.037  | 148.0604 | 116 | 61.8 | O-Acetyl-L-serine               |
| 148.0974 | 147.053 | -0.037  | 148.0604 | 109 | 61.8 | O-Acetyl-L-serine               |
| 148.0974 | 147.053 | -0.037  | 148.0604 | 99  | 61.8 | O-Acetyl-L-serine               |
| 148.0974 | 147.053 | -0.037  | 148.0604 | 159 | 67.3 | O-Acetyl-L-serine               |
| 148.0974 | 147.053 | -0.037  | 148.0604 | 148 | 67.3 | O-Acetyl-L-serine               |
| 148.0974 | 147     | -0.04   | 148.06   | 140 | 32.7 | O-acetyl-L-serine hydrochloride |
| 103.1124 | 102.116 | 0.011   | 103.123  | 101 | 81.9 | 1,5-Pentanediamine              |
| 103.1124 | 102.116 | 0.011   | 103.123  | 98  | 81.9 | 1,5-Pentanediamine              |
| 103.1124 | 102.116 | 0.011   | 103.123  | 97  | 81.9 | 1,5-Pentanediamine              |
| 103.1124 | 102.116 | 0.011   | 103.123  | 222 | 85.2 | 1,5-Pentanediamine              |
| 103.1124 | 102.116 | 0.011   | 103.123  | 221 | 85.2 | 1,5-Pentanediamine              |
| 103.1124 | 102.116 | 0.011   | 103.123  | 215 | 85.2 | 1,5-Pentanediamine              |
| 97.0774  | 114.104 | 0.0238  | 97.1012  | 17  | 100  | Cyclohexanemethanol             |
| 106.0872 | 105     | 0       | 106.09   | 222 | 73.8 | Diethanolamine                  |
| 106.0872 | 105.079 | -0.0009 | 106.0863 | 197 | 22.5 | Diethanolamine                  |
| 106.0872 | 105.079 | -0.0009 | 106.0863 | 196 | 22.5 | Diethanolamine                  |

|          |         |         |          |     |      |                         |
|----------|---------|---------|----------|-----|------|-------------------------|
| 106.0872 | 105     | 0       | 106.09   | 159 | 73.4 | Diethanolamine          |
| 106.0872 | 105.079 | -0.0009 | 106.0863 | 128 | 20   | Diethanolamine          |
| 106.0872 | 105.079 | -0.0009 | 106.0863 | 127 | 20   | Diethanolamine          |
| 84.0822  | 102.092 | -0.0014 | 84.0808  | 284 | 52   | Betaine aldehyde cation |
| 84.0822  | 102.092 | -0.0014 | 84.0808  | 282 | 48   | Betaine aldehyde cation |
| 84.0822  | 102.092 | -0.0014 | 84.0808  | 257 | 50   | Betaine aldehyde cation |
| 84.0822  | 102.092 | -0.0014 | 84.0808  | 257 | 50   | Betaine aldehyde cation |
| 84.0822  | 102.092 | -0.0014 | 84.0808  | 231 | 55.4 | Betaine aldehyde cation |
| 84.0822  | 102.092 | -0.0014 | 84.0808  | 226 | 44.6 | Betaine aldehyde cation |
| 228.1067 | 227.12  | 0.021   | 228.1277 | 118 | 100  | Ametryn                 |
| 228.1067 | 227.12  | 0.021   | 228.1277 | 94  | 100  | Ametryn                 |
| 228.1067 | 227.12  | 0.021   | 228.1277 | 89  | 100  | Ametryn                 |
| 121.1229 | 60.032  | -0.051  | 121.072  | 14  | 61.5 | Urea                    |
| 121.1229 | 60.032  | -0.051  | 121.072  | 12  | 61.5 | Urea                    |
| 121.1229 | 60.032  | -0.051  | 121.072  | 10  | 61.5 | Urea                    |
| 121.1229 | 60.032  | -0.051  | 121.072  | 25  | 76.6 | Urea                    |
| 121.1229 | 60.032  | -0.051  | 121.072  | 20  | 76.6 | Urea                    |
| 121.1229 | 60.032  | -0.051  | 121.072  | 17  | 76.6 | Urea                    |
| 121.1229 | 60.058  | -0.0006 | 121.1223 | 4   | 100  | 1-Propanol              |
| 121.1229 | 60.058  | -0.0006 | 121.1223 | 1   | 100  | 1-Propanol              |
| 121.1229 | 60.058  | -0.0006 | 121.1223 | 1   | 100  | 1-Propanol              |
| 121.1229 | 60.032  | -0.051  | 121.072  | 45  | 78.6 | Urea                    |
| 121.1229 | 60.032  | -0.051  | 121.072  | 36  | 78.6 | Urea                    |
| 121.1229 | 60.032  | -0.051  | 121.072  | 28  | 78.6 | Urea                    |
| 148.0974 | 147.053 | -0.037  | 148.0604 | 106 | 59.9 | O-Acetyl-L-serine       |
| 148.0974 | 147.053 | -0.037  | 148.0604 | 101 | 59.9 | O-Acetyl-L-serine       |
| 148.0974 | 147.053 | -0.037  | 148.0604 | 91  | 59.9 | O-Acetyl-L-serine       |
| 148.0974 | 147.053 | -0.037  | 148.0604 | 136 | 100  | O-Acetyl-L-serine       |
| 148.0974 | 147.053 | -0.037  | 148.0604 | 128 | 100  | O-Acetyl-L-serine       |
| 148.0974 | 147.053 | -0.037  | 148.0604 | 187 | 75   | O-Acetyl-L-serine       |
| 148.0974 | 147.053 | -0.037  | 148.0604 | 175 | 75   | O-Acetyl-L-serine       |
| 148.0974 | 147.053 | -0.037  | 148.0604 | 158 | 75   | O-Acetyl-L-serine       |
| 106.0872 | 105     | 0       | 106.09   | 158 | 76.1 | Diethanolamine          |
| 106.0872 | 105.079 | -0.0009 | 106.0863 | 122 | 18.8 | Diethanolamine          |
| 106.0872 | 105.079 | -0.0009 | 106.0863 | 122 | 18.8 | Diethanolamine          |
| 106.0872 | 105     | 0       | 106.09   | 235 | 75.8 | Diethanolamine          |
| 106.0872 | 105.079 | -0.0009 | 106.0863 | 205 | 21.1 | Diethanolamine          |
| 106.0872 | 105.079 | -0.0009 | 106.0863 | 204 | 21.1 | Diethanolamine          |
| 84.0822  | 102.092 | -0.0014 | 84.0808  | 303 | 52   | Betaine aldehyde cation |
| 84.0822  | 102.092 | -0.0014 | 84.0808  | 301 | 48   | Betaine aldehyde cation |
| 84.0822  | 102.092 | -0.0014 | 84.0808  | 239 | 53.1 | Betaine aldehyde cation |
| 84.0822  | 102.092 | -0.0014 | 84.0808  | 236 | 46.9 | Betaine aldehyde cation |
| 84.0822  | 102.092 | -0.0014 | 84.0808  | 139 | 54.2 | Betaine aldehyde cation |
| 84.0822  | 102.092 | -0.0014 | 84.0808  | 135 | 45.8 | Betaine aldehyde cation |
| 84.0822  | 102.092 | -0.0014 | 84.0808  | 186 | 56   | Betaine aldehyde cation |
| 84.0822  | 102.092 | -0.0014 | 84.0808  | 180 | 44   | Betaine aldehyde cation |
| 228.1067 | 227.12  | 0.021   | 228.1277 | 104 | 100  | Ametryn                 |

|          |         |         |          |     |      |                                       |
|----------|---------|---------|----------|-----|------|---------------------------------------|
| 228.1067 | 227.12  | 0.021   | 228.1277 | 98  | 100  | Ametryn                               |
| 228.1067 | 227.12  | 0.021   | 228.1277 | 94  | 100  | Ametryn                               |
| 121.1229 | 60.032  | -0.051  | 121.072  | 63  | 85.6 | Urea                                  |
| 121.1229 | 60.032  | -0.051  | 121.072  | 62  | 85.6 | Urea                                  |
| 121.1229 | 60.032  | -0.051  | 121.072  | 61  | 85.6 | Urea                                  |
| 121.1229 | 60.032  | -0.051  | 121.072  | 45  | 80.4 | Urea                                  |
| 121.1229 | 60.032  | -0.051  | 121.072  | 38  | 80.4 | Urea                                  |
| 121.1229 | 60.032  | -0.051  | 121.072  | 31  | 80.4 | Urea                                  |
| 121.1229 | 60.032  | -0.051  | 121.072  | 46  | 82.2 | Urea                                  |
| 121.1229 | 60.058  | -0.0006 | 121.1223 | 2   | 17.8 | 1-Propanol                            |
| 121.1229 | 60.058  | -0.0006 | 121.1223 | 1   | 17.8 | 1-Propanol                            |
| 121.1229 | 60.032  | -0.051  | 121.072  | 37  | 79.9 | Urea                                  |
| 121.1229 | 60.032  | -0.051  | 121.072  | 30  | 79.9 | Urea                                  |
| 121.1229 | 60.032  | -0.051  | 121.072  | 23  | 79.9 | Urea                                  |
| 148.0974 | 147     | -0.04   | 148.06   | 25  | 100  | O-acetyl-L-serine hydrochloride       |
| 148.0974 | 147.053 | -0.037  | 148.0604 | 165 | 100  | O-Acetyl-L-serine                     |
| 148.0974 | 147.053 | -0.037  | 148.0604 | 154 | 100  | O-Acetyl-L-serine                     |
| 148.0974 | 147.053 | -0.037  | 148.0604 | 142 | 76.6 | O-Acetyl-L-serine                     |
| 148.0974 | 147.053 | -0.037  | 148.0604 | 133 | 76.6 | O-Acetyl-L-serine                     |
| 148.0974 | 147.053 | -0.037  | 148.0604 | 120 | 76.6 | O-Acetyl-L-serine                     |
| 97.0774  | 114.104 | 0.0238  | 97.1012  | 25  | 19.9 | Cyclohexanol, 2-methyl-, trans-       |
| 97.0774  | 114.104 | 0.0238  | 97.1012  | 23  | 18.4 | Cycloheptanol                         |
| 97.0774  | 114.104 | 0.0238  | 97.1012  | 22  | 17.7 | Cyclopentanemethanol, .alpha.-methyl- |
| 106.0872 | 105     | 0       | 106.09   | 155 | 74.4 | Diethanolamine                        |
| 106.0872 | 105.079 | -0.0009 | 106.0863 | 121 | 19.1 | Diethanolamine                        |
| 106.0872 | 105.079 | -0.0009 | 106.0863 | 120 | 19.1 | Diethanolamine                        |
| 106.0872 | 105     | 0       | 106.09   | 183 | 79.3 | Diethanolamine                        |
| 106.0872 | 105.079 | -0.0009 | 106.0863 | 150 | 20.7 | Diethanolamine                        |
| 106.0872 | 105.079 | -0.0009 | 106.0863 | 150 | 20.7 | Diethanolamine                        |
| 106.0872 | 105.079 | -0.0009 | 106.0863 | 151 | 100  | Diethanolamine                        |
| 106.0872 | 105.079 | -0.0009 | 106.0863 | 150 | 100  | Diethanolamine                        |
| 106.0872 | 105.079 | -0.0009 | 106.0863 | 144 | 100  | Diethanolamine                        |
| 121.1229 | 60.032  | -0.051  | 121.072  | 41  | 81.4 | Urea                                  |
| 121.1229 | 60.032  | -0.051  | 121.072  | 38  | 81.4 | Urea                                  |
| 121.1229 | 60.032  | -0.051  | 121.072  | 35  | 81.4 | Urea                                  |
| 121.1229 | 60.032  | -0.051  | 121.072  | 40  | 80.9 | Urea                                  |
| 121.1229 | 60.032  | -0.051  | 121.072  | 32  | 80.9 | Urea                                  |
| 121.1229 | 60.032  | -0.051  | 121.072  | 25  | 80.9 | Urea                                  |
| 121.1229 | 60.032  | -0.051  | 121.072  | 44  | 81.9 | Urea                                  |
| 121.1229 | 60.032  | -0.051  | 121.072  | 36  | 81.9 | Urea                                  |
| 121.1229 | 60.058  | -0.0006 | 121.1223 | 1   | 18.1 | 1-Propanol                            |
| 103.1124 | 102.068 | -0.037  | 103.0754 | 107 | 100  | Pentanoic acid                        |
| 103.1124 | 102.068 | -0.037  | 103.0754 | 68  | 100  | Pentanoic acid                        |
| 103.1124 | 102.068 | -0.037  | 103.0754 | 67  | 100  | Pentanoic acid                        |
| 103.1124 | 102.116 | 0.011   | 103.123  | 164 | 91.8 | 1,5-Pentanediamine                    |
| 103.1124 | 102.116 | 0.011   | 103.123  | 161 | 91.8 | 1,5-Pentanediamine                    |

|          |         |         |          |     |      |                                               |
|----------|---------|---------|----------|-----|------|-----------------------------------------------|
| 103.1124 | 102.068 | -0.037  | 103.0754 | 78  | 8.2  | Pentanoic acid                                |
| 84.0822  | 102.092 | -0.0014 | 84.0808  | 191 | 50   | Betaine aldehyde cation                       |
| 84.0822  | 102.092 | -0.0014 | 84.0808  | 191 | 50   | Betaine aldehyde cation                       |
| 84.0822  | 102.092 | -0.0014 | 84.0808  | 167 | 52   | Betaine aldehyde cation                       |
| 84.0822  | 102.092 | -0.0014 | 84.0808  | 165 | 48   | Betaine aldehyde cation                       |
| 228.1067 | 227.12  | 0.021   | 228.1277 | 54  | 100  | Ametryn                                       |
| 103.1124 | 102.116 | 0.011   | 103.123  | 104 | 63.5 | 1,5-Pentanediamine                            |
| 103.1124 | 102.116 | 0.011   | 103.123  | 103 | 63.5 | 1,5-Pentanediamine                            |
| 103.1124 | 102.116 | 0.011   | 103.123  | 102 | 63.5 | 1,5-Pentanediamine                            |
| 103.1124 | 102.116 | 0.011   | 103.123  | 217 | 100  | 1,5-Pentanediamine                            |
| 103.1124 | 102.116 | 0.011   | 103.123  | 215 | 100  | 1,5-Pentanediamine                            |
| 103.1124 | 102.116 | 0.011   | 103.123  | 213 | 100  | 1,5-Pentanediamine                            |
| 103.1124 | 102.116 | 0.011   | 103.123  | 227 | 100  | 1,5-Pentanediamine                            |
| 103.1124 | 102.116 | 0.011   | 103.123  | 225 | 100  | 1,5-Pentanediamine                            |
| 371.2569 | 370.214 | -0.0352 | 371.2217 | 74  | 32.4 | 17-Phenyltrinor-13,14-dihydroprostaglandin A2 |
| 371.2569 | 370.214 | -0.0352 | 371.2217 | 74  | 32.4 | Spiromesifen                                  |
| 371.2569 | 370.214 | -0.0352 | 371.2217 | 72  | 32.4 | 17-Phenyltrinor-13,14-dihydroprostaglandin A2 |
| 371.2569 | 370.222 | -0.028  | 371.2289 | 46  | 55.4 | PyroGlu-Ile-Lys                               |
| 371.2569 | 370.222 | -0.028  | 371.2289 | 41  | 44.6 | PyroGlu-Ile-Lys                               |
| 371.2569 | 370.214 | -0.0352 | 371.2217 | 57  | 100  | 17-Phenyltrinor-13,14-dihydroprostaglandin A2 |
| 371.2569 | 370.214 | -0.0352 | 371.2217 | 51  | 100  | 17-Phenyltrinor-13,14-dihydroprostaglandin A2 |
| 186.0588 | 370.196 | 0.0467  | 186.1055 | 60  | 100  | Ser-His-Lys                                   |
| 106.0872 | 105     | 0       | 106.09   | 159 | 78.6 | Diethanolamine                                |
| 106.0872 | 105.079 | -0.0009 | 106.0863 | 128 | 21.4 | Diethanolamine                                |
| 106.0872 | 105.079 | -0.0009 | 106.0863 | 127 | 21.4 | Diethanolamine                                |
| 106.0872 | 105     | 0       | 106.09   | 157 | 78.9 | Diethanolamine                                |
| 106.0872 | 105.079 | -0.0009 | 106.0863 | 125 | 21.1 | Diethanolamine                                |
| 106.0872 | 105.079 | -0.0009 | 106.0863 | 124 | 21.1 | Diethanolamine                                |
| 106.0872 | 105     | 0       | 106.09   | 174 | 79.9 | Diethanolamine                                |
| 106.0872 | 105.079 | -0.0009 | 106.0863 | 139 | 20.1 | Diethanolamine                                |
| 106.0872 | 105.079 | -0.0009 | 106.0863 | 139 | 20.1 | Diethanolamine                                |
| 84.0822  | 102.092 | -0.0014 | 84.0808  | 317 | 52   | Betaine aldehyde cation                       |
| 84.0822  | 102.092 | -0.0014 | 84.0808  | 315 | 48   | Betaine aldehyde cation                       |
| 84.0822  | 102.092 | -0.0014 | 84.0808  | 256 | 50   | Betaine aldehyde cation                       |
| 84.0822  | 102.092 | -0.0014 | 84.0808  | 256 | 50   | Betaine aldehyde cation                       |
| 84.0822  | 102.092 | -0.0014 | 84.0808  | 200 | 54.2 | Betaine aldehyde cation                       |
| 84.0822  | 102.092 | -0.0014 | 84.0808  | 196 | 45.8 | Betaine aldehyde cation                       |
| 228.1067 | 227.12  | 0.021   | 228.1277 | 114 | 100  | Ametryn                                       |
| 228.1067 | 227.12  | 0.021   | 228.1277 | 74  | 100  | Ametryn                                       |
| 228.1067 | 227.12  | 0.021   | 228.1277 | 63  | 100  | Ametryn                                       |
| 121.1229 | 60.032  | -0.051  | 121.072  | 26  | 73.2 | Urea                                          |
| 121.1229 | 60.032  | -0.051  | 121.072  | 24  | 73.2 | Urea                                          |
| 121.1229 | 60.032  | -0.051  | 121.072  | 24  | 73.2 | Urea                                          |

|          |         |         |          |     |      |                                 |
|----------|---------|---------|----------|-----|------|---------------------------------|
| 121.1229 | 60.032  | -0.051  | 121.072  | 53  | 83.3 | Urea                            |
| 121.1229 | 60.032  | -0.051  | 121.072  | 45  | 83.3 | Urea                            |
| 121.1229 | 60.032  | -0.051  | 121.072  | 37  | 83.3 | Urea                            |
| 121.1229 | 60.058  | -0.0006 | 121.1223 | 2   | 100  | 1-Propanol                      |
| 121.1229 | 60.058  | -0.0006 | 121.1223 | 1   | 100  | 1-Propanol                      |
| 121.1229 | 60.032  | -0.051  | 121.072  | 41  | 80.9 | Urea                            |
| 121.1229 | 60.032  | -0.051  | 121.072  | 34  | 80.9 | Urea                            |
| 121.1229 | 60.032  | -0.051  | 121.072  | 26  | 80.9 | Urea                            |
| 148.0974 | 147.053 | -0.037  | 148.0604 | 158 | 100  | O-Acetyl-L-serine               |
| 97.0774  | 114.104 | 0.0238  | 97.1012  | 50  | 33.9 | Cyclohexanol, 1-methyl-         |
| 97.0774  | 114.104 | 0.0238  | 97.1012  | 43  | 25.9 | Cycloheptanol                   |
| 97.0774  | 114.104 | 0.0238  | 97.1012  | 38  | 20.9 | Cyclohexanol, 4-methyl-, trans- |
| 106.0872 | 105.079 | -0.0009 | 106.0863 | 119 | 100  | Diethanolamine                  |
| 106.0872 | 105.079 | -0.0009 | 106.0863 | 119 | 100  | Diethanolamine                  |
| 106.0872 | 105.079 | -0.0009 | 106.0863 | 117 | 100  | Diethanolamine                  |
| 228.1067 | 227.12  | 0.021   | 228.1277 | 70  | 100  | Ametryn                         |
| 121.1229 | 60.032  | -0.051  | 121.072  | 47  | 82.7 | Urea                            |
| 121.1229 | 60.032  | -0.051  | 121.072  | 47  | 82.7 | Urea                            |
| 121.1229 | 60.032  | -0.051  | 121.072  | 47  | 82.7 | Urea                            |
| 121.1229 | 60.032  | -0.051  | 121.072  | 40  | 80.9 | Urea                            |
| 121.1229 | 60.032  | -0.051  | 121.072  | 33  | 80.9 | Urea                            |
| 121.1229 | 60.032  | -0.051  | 121.072  | 27  | 80.9 | Urea                            |
| 121.1229 | 60.058  | -0.0006 | 121.1223 | 1   | 100  | 1-Propanol                      |
| 121.1229 | 60.058  | -0.0006 | 121.1223 | 1   | 100  | 1-Propanol                      |
| 121.1229 | 60.058  | -0.0006 | 121.1223 | 1   | 100  | 1-Propanol                      |
| 121.1229 | 60.032  | -0.051  | 121.072  | 45  | 82.2 | Urea                            |
| 121.1229 | 60.032  | -0.051  | 121.072  | 37  | 82.2 | Urea                            |
| 121.1229 | 60.058  | -0.0006 | 121.1223 | 1   | 17.8 | 1-Propanol                      |
| 106.0872 | 105     | 0       | 106.09   | 169 | 75   | Diethanolamine                  |
| 106.0872 | 105.079 | -0.0009 | 106.0863 | 135 | 19.2 | Diethanolamine                  |
| 106.0872 | 105.079 | -0.0009 | 106.0863 | 135 | 19.2 | Diethanolamine                  |
| 106.0872 | 105     | 0       | 106.09   | 157 | 75   | Diethanolamine                  |
| 106.0872 | 105.079 | -0.0009 | 106.0863 | 124 | 19.6 | Diethanolamine                  |
| 106.0872 | 105.079 | -0.0009 | 106.0863 | 123 | 19.6 | Diethanolamine                  |
| 106.0872 | 105.079 | -0.0009 | 106.0863 | 156 | 100  | Diethanolamine                  |
| 106.0872 | 105.079 | -0.0009 | 106.0863 | 155 | 100  | Diethanolamine                  |
| 106.0872 | 105.079 | -0.0009 | 106.0863 | 154 | 100  | Diethanolamine                  |
| 84.0822  | 102.092 | -0.0014 | 84.0808  | 293 | 52   | Betaine aldehyde cation         |
| 84.0822  | 102.092 | -0.0014 | 84.0808  | 291 | 48   | Betaine aldehyde cation         |
| 84.0822  | 102.092 | -0.0014 | 84.0808  | 234 | 52   | Betaine aldehyde cation         |
| 84.0822  | 102.092 | -0.0014 | 84.0808  | 232 | 48   | Betaine aldehyde cation         |
| 84.0822  | 102.092 | -0.0014 | 84.0808  | 231 | 52   | Betaine aldehyde cation         |
| 84.0822  | 102.092 | -0.0014 | 84.0808  | 229 | 48   | Betaine aldehyde cation         |
| 103.1124 | 102.116 | 0.011   | 103.123  | 127 | 87.3 | 1,5-Pentanediamine              |
| 103.1124 | 102.116 | 0.011   | 103.123  | 127 | 87.3 | 1,5-Pentanediamine              |
| 103.1124 | 102.116 | 0.011   | 103.123  | 119 | 87.3 | 1,5-Pentanediamine              |
| 103.1124 | 102.068 | -0.037  | 103.0754 | 93  | 100  | Pentanoic acid                  |

|          |         |         |          |     |      |                                       |
|----------|---------|---------|----------|-----|------|---------------------------------------|
| 103.1124 | 102.068 | -0.037  | 103.0754 | 66  | 100  | Pentanoic acid                        |
| 103.1124 | 102.068 | -0.037  | 103.0754 | 64  | 100  | Pentanoic acid                        |
| 118.0873 | 117     | 0       | 118.09   | 263 | 30.2 | Betaine                               |
| 118.0873 | 117     | 0       | 118.09   | 263 | 30.2 | Betaine                               |
| 118.0873 | 117.079 | -0.001  | 118.0863 | 260 | 26.7 | Betaine                               |
| 118.0873 | 117.079 | -0.001  | 118.0863 | 257 | 59.8 | Betaine                               |
| 118.0873 | 117.079 | -0.001  | 118.0863 | 254 | 59.8 | Betaine                               |
| 118.0873 | 117.079 | -0.001  | 118.0863 | 252 | 59.8 | Betaine                               |
| 118.0873 | 117.079 | -0.001  | 118.0863 | 345 | 48.4 | Betaine                               |
| 118.0873 | 117.079 | -0.001  | 118.0863 | 342 | 48.4 | Betaine                               |
| 118.0873 | 117.079 | -0.001  | 118.0863 | 341 | 48.4 | Betaine                               |
| 186.0588 | 163.084 | 0.0149  | 186.0737 | 156 | 100  | N,N-Bis(2-hydroxyethyl)glycine        |
| 186.0588 | 370.196 | 0.0467  | 186.1055 | 86  | 100  | Ser-His-Lys                           |
| 186.0588 | 163.084 | 0.0149  | 186.0737 | 150 | 100  | N,N-Bis(2-hydroxyethyl)glycine        |
| 84.0822  | 102.092 | -0.0014 | 84.0808  | 196 | 52   | Betaine aldehyde cation               |
| 84.0822  | 102.092 | -0.0014 | 84.0808  | 194 | 48   | Betaine aldehyde cation               |
| 84.0822  | 102.092 | -0.0014 | 84.0808  | 179 | 53.1 | Betaine aldehyde cation               |
| 84.0822  | 102.092 | -0.0014 | 84.0808  | 176 | 46.9 | Betaine aldehyde cation               |
| 84.0822  | 102.092 | -0.0014 | 84.0808  | 183 | 50   | Betaine aldehyde cation               |
| 84.0822  | 102.092 | -0.0014 | 84.0808  | 183 | 50   | Betaine aldehyde cation               |
| 118.0873 | 117.079 | -0.001  | 118.0863 | 454 | 73.9 | Betaine                               |
| 118.0873 | 117.079 | -0.001  | 118.0863 | 442 | 73.9 | Betaine                               |
| 118.0873 | 117.079 | -0.001  | 118.0863 | 442 | 73.9 | Betaine                               |
| 118.0873 | 117.079 | -0.001  | 118.0863 | 324 | 79.5 | Betaine                               |
| 118.0873 | 117.079 | -0.001  | 118.0863 | 316 | 79.5 | Betaine                               |
| 118.0873 | 117.079 | -0.001  | 118.0863 | 316 | 79.5 | Betaine                               |
| 118.0873 | 117.079 | -0.001  | 118.0863 | 366 | 62.6 | Betaine                               |
| 118.0873 | 117.079 | -0.001  | 118.0863 | 363 | 62.6 | Betaine                               |
| 118.0873 | 117.079 | -0.001  | 118.0863 | 358 | 62.6 | Betaine                               |
| 97.0774  | 114.104 | 0.0238  | 97.1012  | 45  | 26.4 | Cyclohexanol, 1-methyl-               |
| 97.0774  | 114.104 | 0.0238  | 97.1012  | 34  | 18.1 | Cycloheptanol                         |
| 97.0774  | 114.104 | 0.0238  | 97.1012  | 30  | 15.3 | Cyclohexanol, 4-methyl-, trans-       |
| 97.0774  | 114.104 | 0.0238  | 97.1012  | 28  | 22.2 | Cycloheptanol                         |
| 97.0774  | 114.104 | 0.0238  | 97.1012  | 24  | 18.7 | Cyclohexanol, 2-methyl-, trans-       |
| 97.0774  | 114.104 | 0.0238  | 97.1012  | 20  | 15.8 | Cyclopentanemethanol, .alpha.-methyl- |
| 106.0872 | 105     | 0       | 106.09   | 159 | 74.6 | Diethanolamine                        |
| 106.0872 | 105.079 | -0.0009 | 106.0863 | 127 | 19.9 | Diethanolamine                        |
| 106.0872 | 105.079 | -0.0009 | 106.0863 | 126 | 19.9 | Diethanolamine                        |
| 186.0588 | 370.196 | 0.0467  | 186.1055 | 39  | 100  | Ser-His-Lys                           |
| 186.0588 | 163.084 | 0.0149  | 186.0737 | 165 | 93.8 | N,N-Bis(2-hydroxyethyl)glycine        |
| 186.0588 | 370.196 | 0.0467  | 186.1055 | 58  | 6.2  | Ser-His-Lys                           |
| 224.1293 | 446.228 | -0.0081 | 224.1212 | 87  | 64.7 | Tyr-His-Lys                           |
| 224.1293 | 223.084 | -0.0376 | 224.0917 | 70  | 35.3 | N-Acetyl-L-tyrosine                   |
| 224.1293 | 223.084 | -0.0376 | 224.0917 | 55  | 35.3 | N-Acetyl-L-tyrosine                   |
| 224.1293 | 223.084 | -0.0376 | 224.0917 | 218 | 93.1 | N-Acetyl-L-tyrosine                   |
| 224.1293 | 223.084 | -0.0376 | 224.0917 | 196 | 93.1 | N-Acetyl-L-tyrosine                   |

|          |         |         |          |     |      |                                 |
|----------|---------|---------|----------|-----|------|---------------------------------|
| 224.1293 | 223.084 | -0.0376 | 224.0917 | 171 | 93.1 | N-Acetyl-L-tyrosine             |
| 224.1293 | 223.084 | -0.0376 | 224.0917 | 300 | 88.4 | N-Acetyl-L-tyrosine             |
| 224.1293 | 223.084 | -0.0376 | 224.0917 | 288 | 88.4 | N-Acetyl-L-tyrosine             |
| 224.1293 | 223.084 | -0.0376 | 224.0917 | 267 | 88.4 | N-Acetyl-L-tyrosine             |
| 118.0873 | 117.079 | -0.001  | 118.0863 | 392 | 72.2 | Betaine                         |
| 118.0873 | 117.079 | -0.001  | 118.0863 | 389 | 72.2 | Betaine                         |
| 118.0873 | 117.079 | -0.001  | 118.0863 | 378 | 72.2 | Betaine                         |
| 118.0873 | 117.079 | -0.001  | 118.0863 | 257 | 65.1 | Betaine                         |
| 118.0873 | 117.079 | -0.001  | 118.0863 | 255 | 65.1 | Betaine                         |
| 118.0873 | 117.079 | -0.001  | 118.0863 | 251 | 65.1 | Betaine                         |
| 118.0873 | 117.079 | -0.001  | 118.0863 | 268 | 40.1 | Betaine                         |
| 118.0873 | 117.079 | -0.001  | 118.0863 | 266 | 40.1 | Betaine                         |
| 118.0873 | 117.079 | -0.001  | 118.0863 | 266 | 40.1 | Betaine                         |
| 97.0774  | 114.104 | 0.0238  | 97.1012  | 71  | 25.7 | Cyclohexanol, 1-methyl-         |
| 97.0774  | 114.104 | 0.0238  | 97.1012  | 66  | 20.7 | Cyclohexanemethanol             |
| 97.0774  | 114.104 | 0.0238  | 97.1012  | 60  | 16.3 | Cycloheptanol                   |
| 186.0588 | 370.196 | 0.0467  | 186.1055 | 55  | 35.3 | Ser-His-Lys                     |
| 186.0588 | 370.196 | 0.0467  | 186.1055 | 49  | 27.7 | Ser-His-Lys                     |
| 186.0588 | 370.196 | 0.0467  | 186.1055 | 37  | 18.5 | Ser-His-Lys                     |
| 186.0588 | 370.196 | 0.0467  | 186.1055 | 50  | 100  | Ser-His-Lys                     |
| 224.1293 | 223.1   | -0.022  | 224.107  | 159 | 100  | N-Fluorenylacetamide            |
| 224.1293 | 223.1   | -0.022  | 224.107  | 155 | 100  | N-Fluorenylacetamide            |
| 224.1293 | 223.1   | -0.022  | 224.107  | 147 | 100  | N-Fluorenylacetamide            |
| 224.1293 | 223.084 | -0.0376 | 224.0917 | 146 | 51   | N-Acetyl-L-tyrosine             |
| 224.1293 | 446.228 | -0.0081 | 224.1212 | 145 | 49   | Tyr-His-Lys                     |
| 224.1293 | 223.084 | -0.0376 | 224.0917 | 144 | 51   | N-Acetyl-L-tyrosine             |
| 224.1293 | 223.084 | -0.0376 | 224.0917 | 254 | 93.8 | N-Acetyl-L-tyrosine             |
| 224.1293 | 223.084 | -0.0376 | 224.0917 | 246 | 93.8 | N-Acetyl-L-tyrosine             |
| 224.1293 | 223.084 | -0.0376 | 224.0917 | 216 | 93.8 | N-Acetyl-L-tyrosine             |
| 224.1293 | 223.084 | -0.0376 | 224.0917 | 279 | 91.5 | N-Acetyl-L-tyrosine             |
| 224.1293 | 223.084 | -0.0376 | 224.0917 | 245 | 91.5 | N-Acetyl-L-tyrosine             |
| 224.1293 | 223.084 | -0.0376 | 224.0917 | 213 | 91.5 | N-Acetyl-L-tyrosine             |
| 125.9874 | 125     | 0.04    | 126.03   | 169 | 91.8 | 2-Aminoethylphosphonic acid     |
| 125.9874 | 125.015 | 0.0345  | 126.0219 | 83  | 8.2  | Taurine                         |
| 125.9874 | 125     | 0.04    | 126.03   | 151 | 100  | 2-Aminoethylphosphonic acid     |
| 125.9874 | 125     | 0.04    | 126.03   | 145 | 100  | 2-Aminoethylphosphonic acid     |
| 186.0588 | 163.084 | 0.0149  | 186.0737 | 183 | 89   | N,N-Bis(2-hydroxyethyl)glycine  |
| 186.0588 | 163.084 | 0.0149  | 186.0737 | 116 | 89   | N,N-Bis(2-hydroxyethyl)glycine  |
| 186.0588 | 370.196 | 0.0467  | 186.1055 | 57  | 3.9  | Ser-His-Lys                     |
| 97.0774  | 114.104 | 0.0238  | 97.1012  | 45  | 55.1 | Cyclohexanol, 4-methyl-, trans- |
| 97.0774  | 114.104 | 0.0238  | 97.1012  | 25  | 25.1 | Cyclohexanol, 1-methyl-         |
| 97.0774  | 114.104 | 0.0238  | 97.1012  | 19  | 19.7 | Cycloheptanol                   |
| 167.0138 | 166.049 | 0.0426  | 167.0564 | 272 | 91.3 | 7-Methylxanthine                |
| 167.0138 | 166.049 | 0.0426  | 167.0564 | 267 | 91.3 | 7-Methylxanthine                |
| 167.0138 | 166.049 | 0.0426  | 167.0564 | 264 | 91.3 | 7-Methylxanthine                |
| 167.0138 | 166.049 | 0.0426  | 167.0564 | 280 | 96.3 | 7-Methylxanthine                |
| 167.0138 | 166.049 | 0.0426  | 167.0564 | 275 | 96.3 | 7-Methylxanthine                |



|          |         |         |          |     |      |                                       |
|----------|---------|---------|----------|-----|------|---------------------------------------|
| 167.0138 | 166.049 | 0.0426  | 167.0564 | 251 | 96.3 | 7-Methylxanthine                      |
| 167.0138 | 166.049 | 0.0426  | 167.0564 | 264 | 90.9 | 7-Methylxanthine                      |
| 167.0138 | 166.049 | 0.0426  | 167.0564 | 263 | 90.9 | 7-Methylxanthine                      |
| 167.0138 | 166.049 | 0.0426  | 167.0564 | 249 | 90.9 | 7-Methylxanthine                      |
| 167.0138 | 166.049 | 0.0426  | 167.0564 | 329 | 96.2 | 7-Methylxanthine                      |
| 167.0138 | 166.049 | 0.0426  | 167.0564 | 313 | 96.2 | 7-Methylxanthine                      |
| 167.0138 | 166.049 | 0.0426  | 167.0564 | 311 | 96.2 | 7-Methylxanthine                      |
| 118.0873 | 117.079 | -0.001  | 118.0863 | 206 | 100  | Betaine                               |
| 118.0873 | 117.079 | -0.001  | 118.0863 | 30  | 100  | Betaine                               |
| 118.0873 | 117.079 | -0.001  | 118.0863 | 30  | 100  | Betaine                               |
| 118.0873 | 117.079 | -0.001  | 118.0863 | 479 | 68.2 | Betaine                               |
| 118.0873 | 117.079 | -0.001  | 118.0863 | 475 | 68.2 | Betaine                               |
| 118.0873 | 117.079 | -0.001  | 118.0863 | 467 | 68.2 | Betaine                               |
| 118.0873 | 117.079 | -0.001  | 118.0863 | 298 | 60.8 | Betaine                               |
| 118.0873 | 117.079 | -0.001  | 118.0863 | 298 | 60.8 | Betaine                               |
| 118.0873 | 117.079 | -0.001  | 118.0863 | 295 | 60.8 | Betaine                               |
| 118.0873 | 117.079 | -0.001  | 118.0863 | 345 | 42.1 | Betaine                               |
| 118.0873 | 117.079 | -0.001  | 118.0863 | 340 | 42.1 | Betaine                               |
| 118.0873 | 117.079 | -0.001  | 118.0863 | 337 | 42.1 | Betaine                               |
| 186.0588 | 163.084 | 0.0149  | 186.0737 | 138 | 85.9 | N,N-Bis(2-hydroxyethyl)glycine        |
| 186.0588 | 203.091 | 0.0285  | 186.0873 | 74  | 14.1 | Ala-Asn                               |
| 97.0774  | 114.104 | 0.0238  | 97.1012  | 33  | 100  | Cyclopentanemethanol, .alpha.-methyl- |
| 97.0774  | 114.104 | 0.0238  | 97.1012  | 29  | 23.8 | Cyclohexanol, 1-methyl-               |
| 97.0774  | 114.104 | 0.0238  | 97.1012  | 20  | 17.3 | Cycloheptanol                         |
| 97.0774  | 114.104 | 0.0238  | 97.1012  | 17  | 15.3 | Cyclohexanemethanol                   |
| 118.0873 | 117.079 | -0.001  | 118.0863 | 367 | 29.5 | Betaine                               |
| 118.0873 | 117.079 | -0.001  | 118.0863 | 362 | 29.5 | Betaine                               |
| 118.0873 | 117.079 | -0.001  | 118.0863 | 361 | 29.5 | Betaine                               |
| 118.0873 | 117.079 | -0.001  | 118.0863 | 508 | 74.5 | Betaine                               |
| 118.0873 | 117.079 | -0.001  | 118.0863 | 500 | 74.5 | Betaine                               |
| 118.0873 | 117.079 | -0.001  | 118.0863 | 490 | 74.5 | Betaine                               |
| 118.0873 | 117.079 | -0.001  | 118.0863 | 302 | 66.9 | Betaine                               |
| 118.0873 | 117.079 | -0.001  | 118.0863 | 297 | 66.9 | Betaine                               |
| 118.0873 | 117.079 | -0.001  | 118.0863 | 292 | 66.9 | Betaine                               |
| 118.0873 | 117.079 | -0.001  | 118.0863 | 293 | 71.8 | Betaine                               |
| 118.0873 | 117.079 | -0.001  | 118.0863 | 291 | 71.8 | Betaine                               |
| 118.0873 | 117.079 | -0.001  | 118.0863 | 288 | 71.8 | Betaine                               |
| 186.0588 | 203.091 | 0.0285  | 186.0873 | 61  | 84.7 | Ala-Asn                               |
| 186.0588 | 163.084 | 0.0149  | 186.0737 | 2   | 15.3 | N,N-Bis(2-hydroxyethyl)glycine        |
| 186.0588 | 163.084 | 0.0149  | 186.0737 | 148 | 100  | N,N-Bis(2-hydroxyethyl)glycine        |
| 224.1293 | 446.228 | -0.0081 | 224.1212 | 115 | 88   | Tyr-His-Lys                           |
| 224.1293 | 223.084 | -0.0376 | 224.0917 | 42  | 12   | Bendiocarb                            |
| 224.1293 | 223.084 | -0.0376 | 224.0917 | 296 | 94.1 | N-Acetyl-L-tyrosine                   |
| 224.1293 | 223.084 | -0.0376 | 224.0917 | 273 | 94.1 | N-Acetyl-L-tyrosine                   |
| 224.1293 | 223.084 | -0.0376 | 224.0917 | 249 | 94.1 | N-Acetyl-L-tyrosine                   |
| 224.1293 | 223.084 | -0.0376 | 224.0917 | 275 | 81.5 | N-Acetyl-L-tyrosine                   |

|          |         |         |          |     |      |                                 |
|----------|---------|---------|----------|-----|------|---------------------------------|
| 224.1293 | 223.084 | -0.0376 | 224.0917 | 256 | 81.5 | N-Acetyl-L-tyrosine             |
| 224.1293 | 223.084 | -0.0376 | 224.0917 | 226 | 81.5 | N-Acetyl-L-tyrosine             |
| 118.0873 | 117.079 | -0.001  | 118.0863 | 335 | 48.9 | Betaine                         |
| 118.0873 | 117.079 | -0.001  | 118.0863 | 328 | 48.9 | Betaine                         |
| 118.0873 | 117.079 | -0.001  | 118.0863 | 323 | 48.9 | Betaine                         |
| 118.0873 | 117.079 | -0.001  | 118.0863 | 387 | 56.3 | Betaine                         |
| 118.0873 | 117.079 | -0.001  | 118.0863 | 385 | 56.3 | Betaine                         |
| 118.0873 | 117.079 | -0.001  | 118.0863 | 380 | 56.3 | Betaine                         |
| 118.0873 | 117.079 | -0.001  | 118.0863 | 316 | 83.4 | Betaine                         |
| 118.0873 | 117.079 | -0.001  | 118.0863 | 314 | 83.4 | Betaine                         |
| 118.0873 | 117.079 | -0.001  | 118.0863 | 304 | 83.4 | Betaine                         |
| 118.0873 | 117.079 | -0.001  | 118.0863 | 319 | 62.9 | Betaine                         |
| 118.0873 | 117.079 | -0.001  | 118.0863 | 315 | 62.9 | Betaine                         |
| 118.0873 | 117.079 | -0.001  | 118.0863 | 313 | 62.9 | Betaine                         |
| 186.0588 | 163.084 | 0.0149  | 186.0737 | 134 | 100  | N,N-Bis(2-hydroxyethyl)glycine  |
| 186.0588 | 370.196 | 0.0467  | 186.1055 | 55  | 52   | Ser-His-Lys                     |
| 186.0588 | 370.196 | 0.0467  | 186.1055 | 53  | 48   | Ser-His-Lys                     |
| 186.0588 | 370.196 | 0.0467  | 186.1055 | 59  | 100  | Ser-His-Lys                     |
| 118.0873 | 117.079 | -0.001  | 118.0863 | 265 | 100  | Betaine                         |
| 118.0873 | 117.079 | -0.001  | 118.0863 | 257 | 100  | Betaine                         |
| 118.0873 | 117.079 | -0.001  | 118.0863 | 243 | 100  | Betaine                         |
| 118.0873 | 117.079 | -0.001  | 118.0863 | 444 | 62.9 | Betaine                         |
| 118.0873 | 117.079 | -0.001  | 118.0863 | 441 | 62.9 | Betaine                         |
| 118.0873 | 117.079 | -0.001  | 118.0863 | 432 | 62.9 | Betaine                         |
| 118.0873 | 117.079 | -0.001  | 118.0863 | 207 | 67.7 | Betaine                         |
| 118.0873 | 117.079 | -0.001  | 118.0863 | 206 | 67.7 | Betaine                         |
| 118.0873 | 117.079 | -0.001  | 118.0863 | 201 | 67.7 | Betaine                         |
| 118.0873 | 117.079 | -0.001  | 118.0863 | 291 | 59.3 | Betaine                         |
| 118.0873 | 117.079 | -0.001  | 118.0863 | 288 | 59.3 | Betaine                         |
| 118.0873 | 117.079 | -0.001  | 118.0863 | 283 | 59.3 | Betaine                         |
| 186.0588 | 163.084 | 0.0149  | 186.0737 | 147 | 100  | N,N-Bis(2-hydroxyethyl)glycine  |
| 186.0588 | 163.084 | 0.0149  | 186.0737 | 147 | 100  | N,N-Bis(2-hydroxyethyl)glycine  |
| 97.0774  | 114.104 | 0.0238  | 97.1012  | 22  | 33.6 | Cyclohexanol, 2-methyl-, trans- |
| 97.0774  | 114.104 | 0.0238  | 97.1012  | 16  | 26.4 | Cyclohexanol, 4-methyl-, trans- |
| 97.0774  | 114.104 | 0.0238  | 97.1012  | 14  | 26.4 | Cyclohexanol, 4-methyl-, trans- |
| 140.0692 | 139.1   | 0.038   | 140.107  | 96  | 100  | Tropinone                       |
| 140.0692 | 139.1   | 0.038   | 140.107  | 95  | 100  | Tropinone                       |
| 140.0692 | 139.1   | 0.038   | 140.107  | 91  | 100  | Tropinone                       |
| 118.0873 | 117.079 | -0.001  | 118.0863 | 329 | 42.2 | Betaine                         |
| 118.0873 | 117.079 | -0.001  | 118.0863 | 329 | 42.2 | Betaine                         |
| 118.0873 | 117.079 | -0.001  | 118.0863 | 326 | 42.2 | Betaine                         |
| 118.0873 | 117.079 | -0.001  | 118.0863 | 378 | 76.4 | Betaine                         |
| 118.0873 | 117.079 | -0.001  | 118.0863 | 371 | 76.4 | Betaine                         |
| 118.0873 | 117.079 | -0.001  | 118.0863 | 362 | 76.4 | Betaine                         |
| 118.0873 | 117.079 | -0.001  | 118.0863 | 279 | 69.3 | Betaine                         |
| 118.0873 | 117.079 | -0.001  | 118.0863 | 279 | 69.3 | Betaine                         |
| 118.0873 | 117.079 | -0.001  | 118.0863 | 275 | 69.3 | Betaine                         |

|          |         |         |          |     |      |                                |
|----------|---------|---------|----------|-----|------|--------------------------------|
| 118.0873 | 117.079 | -0.001  | 118.0863 | 355 | 61.4 | Betaine                        |
| 118.0873 | 117.079 | -0.001  | 118.0863 | 350 | 61.4 | Betaine                        |
| 118.0873 | 117.079 | -0.001  | 118.0863 | 349 | 61.4 | Betaine                        |
| 186.0588 | 163.084 | 0.0149  | 186.0737 | 172 | 100  | N,N-Bis(2-hydroxyethyl)glycine |
| 186.0588 | 163.084 | 0.0149  | 186.0737 | 157 | 84.9 | N,N-Bis(2-hydroxyethyl)glycine |
| 186.0588 | 203.095 | 0.0325  | 186.0913 | 97  | 15.1 | Indole-3-butyric acid          |
| 186.0588 | 203.095 | 0.0325  | 186.0913 | 83  | 15.1 | Indole-3-butyric acid          |
| 186.0588 | 163.084 | 0.0149  | 186.0737 | 139 | 100  | N,N-Bis(2-hydroxyethyl)glycine |
| 195.1236 | 194.115 | -0.0009 | 195.1227 | 280 | 98.4 | Tetraethylene glycol           |
| 195.1236 | 194.115 | -0.0009 | 195.1227 | 279 | 98.4 | Tetraethylene glycol           |
| 195.1236 | 194.115 | -0.0009 | 195.1227 | 277 | 98.4 | Tetraethylene glycol           |
| 195.1236 | 194.115 | -0.0009 | 195.1227 | 241 | 100  | Tetraethylene glycol           |
| 195.1236 | 194.115 | -0.0009 | 195.1227 | 241 | 100  | Tetraethylene glycol           |
| 195.1236 | 194.115 | -0.0009 | 195.1227 | 239 | 100  | Tetraethylene glycol           |
| 118.0873 | 117     | 0       | 118.09   | 339 | 24.1 | Betaine                        |
| 118.0873 | 117.079 | -0.001  | 118.0863 | 336 | 21.3 | Betaine                        |
| 118.0873 | 117     | 0       | 118.09   | 336 | 21.3 | Betaine                        |
| 118.0873 | 117.079 | -0.001  | 118.0863 | 506 | 68.9 | Betaine                        |
| 118.0873 | 117.079 | -0.001  | 118.0863 | 501 | 68.9 | Betaine                        |
| 118.0873 | 117.079 | -0.001  | 118.0863 | 501 | 68.9 | Betaine                        |
| 118.0873 | 117.079 | -0.001  | 118.0863 | 169 | 61.4 | Betaine                        |
| 118.0873 | 117.079 | -0.001  | 118.0863 | 169 | 61.4 | Betaine                        |
| 118.0873 | 117.079 | -0.001  | 118.0863 | 163 | 61.4 | Betaine                        |
| 118.0873 | 117.079 | -0.001  | 118.0863 | 283 | 65.8 | Betaine                        |
| 118.0873 | 117.079 | -0.001  | 118.0863 | 282 | 65.8 | Betaine                        |
| 118.0873 | 117.079 | -0.001  | 118.0863 | 278 | 65.8 | Betaine                        |
| 186.0588 | 163.084 | 0.0149  | 186.0737 | 203 | 92.3 | N,N-Bis(2-hydroxyethyl)glycine |
| 186.0588 | 163.084 | 0.0149  | 186.0737 | 146 | 92.3 | N,N-Bis(2-hydroxyethyl)glycine |
| 186.0588 | 203.091 | 0.0285  | 186.0873 | 99  | 6.4  | Ala-Asn                        |
| 186.0588 | 163.084 | 0.0149  | 186.0737 | 161 | 94   | N,N-Bis(2-hydroxyethyl)glycine |
| 186.0588 | 370.196 | 0.0467  | 186.1055 | 51  | 6    | Ser-His-Lys                    |
| 140.0692 | 139.063 | 0.0014  | 140.0706 | 55  | 100  | 5-Amino-2-methoxyphenol        |
| 224.1293 | 223.1   | -0.022  | 224.107  | 138 | 76.6 | N-Fluorenylacetamide           |
| 224.1293 | 223.1   | -0.022  | 224.107  | 131 | 76.6 | N-Fluorenylacetamide           |
| 224.1293 | 223.1   | -0.022  | 224.107  | 130 | 76.6 | N-Fluorenylacetamide           |
| 224.1293 | 446.228 | -0.0081 | 224.1212 | 134 | 49.4 | Tyr-His-Lys                    |
| 224.1293 | 223.084 | -0.0376 | 224.0917 | 124 | 34.9 | N-Acetyl-L-tyrosine            |
| 224.1293 | 223.084 | -0.0376 | 224.0917 | 113 | 34.9 | N-Acetyl-L-tyrosine            |
| 224.1293 | 223.084 | -0.0376 | 224.0917 | 204 | 87.1 | N-Acetyl-L-tyrosine            |
| 224.1293 | 223.084 | -0.0376 | 224.0917 | 194 | 87.1 | N-Acetyl-L-tyrosine            |
| 224.1293 | 223.084 | -0.0376 | 224.0917 | 168 | 87.1 | N-Acetyl-L-tyrosine            |
| 224.1293 | 223.084 | -0.0376 | 224.0917 | 274 | 91.7 | N-Acetyl-L-tyrosine            |
| 224.1293 | 223.084 | -0.0376 | 224.0917 | 258 | 91.7 | N-Acetyl-L-tyrosine            |
| 224.1293 | 223.084 | -0.0376 | 224.0917 | 221 | 91.7 | N-Acetyl-L-tyrosine            |
| 118.0873 | 117.079 | -0.001  | 118.0863 | 215 | 80.1 | Betaine                        |
| 118.0873 | 117.079 | -0.001  | 118.0863 | 211 | 80.1 | Betaine                        |
| 118.0873 | 117.079 | -0.001  | 118.0863 | 205 | 80.1 | Betaine                        |

|          |         |         |          |     |      |                                  |
|----------|---------|---------|----------|-----|------|----------------------------------|
| 118.0873 | 117.079 | -0.001  | 118.0863 | 423 | 77.2 | Betaine                          |
| 118.0873 | 117.079 | -0.001  | 118.0863 | 414 | 77.2 | Betaine                          |
| 118.0873 | 117.079 | -0.001  | 118.0863 | 401 | 77.2 | Betaine                          |
| 118.0873 | 117.079 | -0.001  | 118.0863 | 350 | 87   | Betaine                          |
| 118.0873 | 117.079 | -0.001  | 118.0863 | 344 | 87   | Betaine                          |
| 118.0873 | 117.079 | -0.001  | 118.0863 | 340 | 87   | Betaine                          |
| 118.0873 | 117.079 | -0.001  | 118.0863 | 293 | 81.6 | Betaine                          |
| 118.0873 | 117.079 | -0.001  | 118.0863 | 293 | 81.6 | Betaine                          |
| 118.0873 | 117.079 | -0.001  | 118.0863 | 289 | 81.6 | Betaine                          |
| 186.0588 | 163.084 | 0.0149  | 186.0737 | 168 | 100  | N,N-Bis(2-hydroxyethyl)glycine   |
| 186.0588 | 163.084 | 0.0149  | 186.0737 | 141 | 100  | N,N-Bis(2-hydroxyethyl)glycine   |
| 224.1293 | 223.084 | -0.0376 | 224.0917 | 203 | 76   | N-Acetyl-L-tyrosine              |
| 224.1293 | 223.084 | -0.0376 | 224.0917 | 200 | 76   | N-Acetyl-L-tyrosine              |
| 224.1293 | 223.084 | -0.0376 | 224.0917 | 194 | 76   | N-Acetyl-L-tyrosine              |
| 224.1293 | 223.084 | -0.0376 | 224.0917 | 214 | 100  | N-Acetyl-L-tyrosine              |
| 224.1293 | 223.084 | -0.0376 | 224.0917 | 198 | 100  | N-Acetyl-L-tyrosine              |
| 224.1293 | 223.084 | -0.0376 | 224.0917 | 162 | 100  | N-Acetyl-L-tyrosine              |
| 224.1293 | 223.084 | -0.0376 | 224.0917 | 314 | 86.1 | N-Acetyl-L-tyrosine              |
| 224.1293 | 223.084 | -0.0376 | 224.0917 | 296 | 86.1 | N-Acetyl-L-tyrosine              |
| 224.1293 | 223.084 | -0.0376 | 224.0917 | 275 | 86.1 | N-Acetyl-L-tyrosine              |
| 118.0873 | 117.079 | -0.001  | 118.0863 | 245 | 87.3 | Betaine                          |
| 118.0873 | 117.079 | -0.001  | 118.0863 | 236 | 87.3 | Betaine                          |
| 118.0873 | 117.079 | -0.001  | 118.0863 | 230 | 87.3 | Betaine                          |
| 118.0873 | 117     | 0       | 118.09   | 359 | 33.3 | Betaine                          |
| 118.0873 | 117     | 0       | 118.09   | 349 | 23.5 | Betaine                          |
| 118.0873 | 117.079 | -0.001  | 118.0863 | 339 | 16.6 | Betaine                          |
| 118.0873 | 117.079 | -0.001  | 118.0863 | 316 | 71.8 | Betaine                          |
| 118.0873 | 117.079 | -0.001  | 118.0863 | 313 | 71.8 | Betaine                          |
| 118.0873 | 117.079 | -0.001  | 118.0863 | 313 | 71.8 | Betaine                          |
| 186.0588 | 163.084 | 0.0149  | 186.0737 | 137 | 100  | N,N-Bis(2-hydroxyethyl)glycine   |
| 186.0588 | 163.084 | 0.0149  | 186.0737 | 157 | 100  | N,N-Bis(2-hydroxyethyl)glycine   |
| 224.1293 | 223.1   | -0.022  | 224.107  | 166 | 96.6 | N-Fluorenylacetamide             |
| 224.1293 | 223.1   | -0.022  | 224.107  | 165 | 96.6 | N-Fluorenylacetamide             |
| 224.1293 | 241.117 | -0.0151 | 224.1142 | 27  | 3.4  | (6R)-5,6,7,8-Tetrahydrobiopterin |
| 224.1293 | 223.084 | -0.0376 | 224.0917 | 123 | 39.4 | N-Acetyl-L-tyrosine              |
| 224.1293 | 446.228 | -0.0081 | 224.1212 | 115 | 29.4 | Tyr-His-Lys                      |
| 224.1293 | 223.084 | -0.0376 | 224.0917 | 110 | 39.4 | N-Acetyl-L-tyrosine              |
| 224.1293 | 223.084 | -0.0376 | 224.0917 | 258 | 79.9 | N-Acetyl-L-tyrosine              |
| 224.1293 | 223.084 | -0.0376 | 224.0917 | 257 | 79.9 | N-Acetyl-L-tyrosine              |
| 224.1293 | 223.084 | -0.0376 | 224.0917 | 243 | 79.9 | N-Acetyl-L-tyrosine              |
| 224.1293 | 446.228 | -0.0081 | 224.1212 | 186 | 49.5 | Tyr-His-Lys                      |
| 224.1293 | 223.084 | -0.0376 | 224.0917 | 183 | 43.7 | N-Acetyl-L-tyrosine              |
| 224.1293 | 223.084 | -0.0376 | 224.0917 | 171 | 43.7 | N-Acetyl-L-tyrosine              |
| 118.0873 | 117.079 | -0.001  | 118.0863 | 303 | 78.1 | Betaine                          |
| 118.0873 | 117.079 | -0.001  | 118.0863 | 293 | 78.1 | Betaine                          |
| 118.0873 | 117.079 | -0.001  | 118.0863 | 271 | 78.1 | Betaine                          |
| 118.0873 | 117.079 | -0.001  | 118.0863 | 482 | 65   | Betaine                          |

|          |         |         |          |     |      |                                |
|----------|---------|---------|----------|-----|------|--------------------------------|
| 118.0873 | 117.079 | -0.001  | 118.0863 | 481 | 65   | Betaine                        |
| 118.0873 | 117.079 | -0.001  | 118.0863 | 476 | 65   | Betaine                        |
| 118.0873 | 117.079 | -0.001  | 118.0863 | 234 | 66.3 | Betaine                        |
| 118.0873 | 117.079 | -0.001  | 118.0863 | 234 | 66.3 | Betaine                        |
| 118.0873 | 117.079 | -0.001  | 118.0863 | 229 | 66.3 | Betaine                        |
| 118.0873 | 117.079 | -0.001  | 118.0863 | 215 | 68.6 | Betaine                        |
| 118.0873 | 117.079 | -0.001  | 118.0863 | 215 | 68.6 | Betaine                        |
| 118.0873 | 117.079 | -0.001  | 118.0863 | 214 | 68.6 | Betaine                        |
| 186.0588 | 370.196 | 0.0467  | 186.1055 | 92  | 43.2 | Ser-His-Lys                    |
| 186.0588 | 370.196 | 0.0467  | 186.1055 | 91  | 41.6 | Ser-His-Lys                    |
| 186.0588 | 370.196 | 0.0467  | 186.1055 | 68  | 15.2 | Ser-His-Lys                    |
| 140.0692 | 139.1   | 0.038   | 140.107  | 45  | 41.8 | Tropinone                      |
| 140.0692 | 139.1   | 0.038   | 140.107  | 44  | 41.8 | Tropinone                      |
| 140.0692 | 139.1   | 0.038   | 140.107  | 44  | 41.8 | Tropinone                      |
| 97.0774  | 114.104 | 0.0238  | 97.1012  | 21  | 21   | Cyclohexanol, 1-methyl-        |
| 97.0774  | 114.104 | 0.0238  | 97.1012  | 16  | 16.9 | Cycloheptanol                  |
| 97.0774  | 114.104 | 0.0238  | 97.1012  | 15  | 16.3 | Cyclohexanemethanol            |
| 224.1293 | 223.1   | -0.022  | 224.107  | 165 | 79.2 | N-Fluorenylacetamide           |
| 224.1293 | 223.1   | -0.022  | 224.107  | 164 | 79.2 | N-Fluorenylacetamide           |
| 224.1293 | 223.1   | -0.022  | 224.107  | 154 | 79.2 | N-Fluorenylacetamide           |
| 224.1293 | 446.228 | -0.0081 | 224.1212 | 145 | 50.1 | Tyr-His-Lys                    |
| 224.1293 | 223.084 | -0.0376 | 224.0917 | 133 | 33.4 | N-Acetyl-L-tyrosine            |
| 224.1293 | 223.084 | -0.0376 | 224.0917 | 125 | 33.4 | N-Acetyl-L-tyrosine            |
| 224.1293 | 223.084 | -0.0376 | 224.0917 | 169 | 92.3 | N-Acetyl-L-tyrosine            |
| 224.1293 | 223.084 | -0.0376 | 224.0917 | 153 | 92.3 | N-Acetyl-L-tyrosine            |
| 224.1293 | 223.084 | -0.0376 | 224.0917 | 123 | 92.3 | N-Acetyl-L-tyrosine            |
| 224.1293 | 223.084 | -0.0376 | 224.0917 | 303 | 76.5 | N-Acetyl-L-tyrosine            |
| 224.1293 | 223.084 | -0.0376 | 224.0917 | 302 | 76.5 | N-Acetyl-L-tyrosine            |
| 224.1293 | 223.084 | -0.0376 | 224.0917 | 297 | 76.5 | N-Acetyl-L-tyrosine            |
| 118.0873 | 117.079 | -0.001  | 118.0863 | 279 | 63.6 | Betaine                        |
| 118.0873 | 117.079 | -0.001  | 118.0863 | 271 | 63.6 | Betaine                        |
| 118.0873 | 117.079 | -0.001  | 118.0863 | 267 | 63.6 | Betaine                        |
| 118.0873 | 117.079 | -0.001  | 118.0863 | 519 | 69.9 | Betaine                        |
| 118.0873 | 117.079 | -0.001  | 118.0863 | 510 | 69.9 | Betaine                        |
| 118.0873 | 117.079 | -0.001  | 118.0863 | 510 | 69.9 | Betaine                        |
| 118.0873 | 117.079 | -0.001  | 118.0863 | 340 | 84   | Betaine                        |
| 118.0873 | 117.079 | -0.001  | 118.0863 | 335 | 84   | Betaine                        |
| 118.0873 | 117.079 | -0.001  | 118.0863 | 322 | 84   | Betaine                        |
| 118.0873 | 117.079 | -0.001  | 118.0863 | 264 | 98.3 | Betaine                        |
| 118.0873 | 117.079 | -0.001  | 118.0863 | 264 | 98.3 | Betaine                        |
| 118.0873 | 117.079 | -0.001  | 118.0863 | 247 | 98.3 | Betaine                        |
| 186.0588 | 163.084 | 0.0149  | 186.0737 | 165 | 87.2 | N,N-Bis(2-hydroxyethyl)glycine |
| 186.0588 | 163.084 | 0.0149  | 186.0737 | 117 | 87.2 | N,N-Bis(2-hydroxyethyl)glycine |
| 186.0588 | 203.091 | 0.0285  | 186.0873 | 87  | 10.3 | Ala-Asn                        |
| 186.0588 | 163.084 | 0.0149  | 186.0737 | 138 | 100  | N,N-Bis(2-hydroxyethyl)glycine |
| 224.1293 | 223.106 | -0.0164 | 224.1129 | 88  | 100  | N-Acetyl-D-galactosaminitol    |
| 224.1293 | 223.106 | -0.0164 | 224.1129 | 86  | 100  | N-Acetyl-D-galactosaminitol    |

|          |         |         |          |     |      |                                |
|----------|---------|---------|----------|-----|------|--------------------------------|
| 224.1293 | 223.106 | -0.0164 | 224.1129 | 84  | 100  | N-Acetyl-D-galactosaminitol    |
| 224.1293 | 223.084 | -0.0376 | 224.0917 | 103 | 100  | N-Acetyl-L-tyrosine            |
| 224.1293 | 223.084 | -0.0376 | 224.0917 | 95  | 100  | N-Acetyl-L-tyrosine            |
| 224.1293 | 223.084 | -0.0376 | 224.0917 | 295 | 93.4 | N-Acetyl-L-tyrosine            |
| 224.1293 | 223.084 | -0.0376 | 224.0917 | 270 | 93.4 | N-Acetyl-L-tyrosine            |
| 224.1293 | 223.084 | -0.0376 | 224.0917 | 234 | 93.4 | N-Acetyl-L-tyrosine            |
| 224.1293 | 223.084 | -0.0376 | 224.0917 | 336 | 84.5 | N-Acetyl-L-tyrosine            |
| 224.1293 | 223.084 | -0.0376 | 224.0917 | 332 | 84.5 | N-Acetyl-L-tyrosine            |
| 224.1293 | 223.084 | -0.0376 | 224.0917 | 328 | 84.5 | N-Acetyl-L-tyrosine            |
| 118.0873 | 117.079 | -0.001  | 118.0863 | 338 | 54.8 | Betaine                        |
| 118.0873 | 117.079 | -0.001  | 118.0863 | 338 | 54.8 | Betaine                        |
| 118.0873 | 117.079 | -0.001  | 118.0863 | 331 | 54.8 | Betaine                        |
| 118.0873 | 117.079 | -0.001  | 118.0863 | 499 | 46   | Betaine                        |
| 118.0873 | 117.079 | -0.001  | 118.0863 | 495 | 46   | Betaine                        |
| 118.0873 | 117.079 | -0.001  | 118.0863 | 493 | 46   | Betaine                        |
| 118.0873 | 117.079 | -0.001  | 118.0863 | 372 | 62.9 | Betaine                        |
| 118.0873 | 117.079 | -0.001  | 118.0863 | 372 | 62.9 | Betaine                        |
| 118.0873 | 117.079 | -0.001  | 118.0863 | 364 | 62.9 | Betaine                        |
| 118.0873 | 117.079 | -0.001  | 118.0863 | 182 | 64.6 | Betaine                        |
| 118.0873 | 117.079 | -0.001  | 118.0863 | 179 | 64.6 | Betaine                        |
| 118.0873 | 117.079 | -0.001  | 118.0863 | 174 | 64.6 | Betaine                        |
| 186.0588 | 163.084 | 0.0149  | 186.0737 | 150 | 100  | N,N-Bis(2-hydroxyethyl)glycine |
| 224.1293 | 223.084 | -0.0376 | 224.0917 | 193 | 79.9 | N-Acetyl-L-tyrosine            |
| 224.1293 | 223.084 | -0.0376 | 224.0917 | 183 | 79.9 | N-Acetyl-L-tyrosine            |
| 224.1293 | 223.084 | -0.0376 | 224.0917 | 171 | 79.9 | N-Acetyl-L-tyrosine            |
| 224.1293 | 223.084 | -0.0376 | 224.0917 | 279 | 95.8 | N-Acetyl-L-tyrosine            |
| 224.1293 | 223.084 | -0.0376 | 224.0917 | 251 | 95.8 | N-Acetyl-L-tyrosine            |
| 224.1293 | 223.084 | -0.0376 | 224.0917 | 228 | 95.8 | N-Acetyl-L-tyrosine            |
| 224.1293 | 223.084 | -0.0376 | 224.0917 | 320 | 88.7 | N-Acetyl-L-tyrosine            |
| 224.1293 | 223.084 | -0.0376 | 224.0917 | 302 | 88.7 | N-Acetyl-L-tyrosine            |
| 224.1293 | 223.084 | -0.0376 | 224.0917 | 267 | 88.7 | N-Acetyl-L-tyrosine            |
| 118.0873 | 117.079 | -0.001  | 118.0863 | 358 | 31.6 | Betaine                        |
| 118.0873 | 117     | 0       | 118.09   | 355 | 27.9 | Betaine                        |
| 118.0873 | 117.079 | -0.001  | 118.0863 | 352 | 31.6 | Betaine                        |
| 118.0873 | 117.079 | -0.001  | 118.0863 | 472 | 58.2 | Betaine                        |
| 118.0873 | 117.079 | -0.001  | 118.0863 | 467 | 58.2 | Betaine                        |
| 118.0873 | 117.079 | -0.001  | 118.0863 | 462 | 58.2 | Betaine                        |
| 118.0873 | 117.079 | -0.001  | 118.0863 | 289 | 70.2 | Betaine                        |
| 118.0873 | 117.079 | -0.001  | 118.0863 | 287 | 70.2 | Betaine                        |
| 118.0873 | 117.079 | -0.001  | 118.0863 | 282 | 70.2 | Betaine                        |
| 118.0873 | 117.079 | -0.001  | 118.0863 | 358 | 70.1 | Betaine                        |
| 118.0873 | 117.079 | -0.001  | 118.0863 | 355 | 70.1 | Betaine                        |
| 118.0873 | 117.079 | -0.001  | 118.0863 | 352 | 70.1 | Betaine                        |
| 186.0588 | 163.084 | 0.0149  | 186.0737 | 141 | 90.4 | N,N-Bis(2-hydroxyethyl)glycine |
| 186.0588 | 370.196 | 0.0467  | 186.1055 | 60  | 9.6  | Ser-His-Lys                    |
| 186.0588 | 370.196 | 0.0467  | 186.1055 | 48  | 100  | Ser-His-Lys                    |
| 224.1293 | 223.1   | -0.022  | 224.107  | 154 | 100  | N-Fluorenylacetamide           |

|          |         |         |          |     |      |                                               |
|----------|---------|---------|----------|-----|------|-----------------------------------------------|
| 224.1293 | 223.1   | -0.022  | 224.107  | 141 | 100  | N-Fluorenylacetamide                          |
| 224.1293 | 223.1   | -0.022  | 224.107  | 137 | 100  | N-Fluorenylacetamide                          |
| 224.1293 | 223.084 | -0.0376 | 224.0917 | 168 | 51.6 | N-Acetyl-L-tyrosine                           |
| 224.1293 | 446.228 | -0.0081 | 224.1212 | 158 | 36.4 | Tyr-His-Lys                                   |
| 224.1293 | 223.084 | -0.0376 | 224.0917 | 138 | 51.6 | N-Acetyl-L-tyrosine                           |
| 224.1293 | 223.084 | -0.0376 | 224.0917 | 141 | 78.6 | N-Acetyl-L-tyrosine                           |
| 224.1293 | 223.084 | -0.0376 | 224.0917 | 128 | 78.6 | N-Acetyl-L-tyrosine                           |
| 224.1293 | 223.084 | -0.0376 | 224.0917 | 103 | 78.6 | N-Acetyl-L-tyrosine                           |
| 224.1293 | 223.084 | -0.0376 | 224.0917 | 156 | 58.6 | N-Acetyl-L-tyrosine                           |
| 224.1293 | 223.084 | -0.0376 | 224.0917 | 150 | 58.6 | N-Acetyl-L-tyrosine                           |
| 224.1293 | 446.228 | -0.0081 | 224.1212 | 146 | 41.4 | Tyr-His-Lys                                   |
| 118.0873 | 117.079 | -0.001  | 118.0863 | 296 | 37.6 | Betaine                                       |
| 118.0873 | 117.079 | -0.001  | 118.0863 | 295 | 37.6 | Betaine                                       |
| 118.0873 | 117.079 | -0.001  | 118.0863 | 294 | 37.6 | Betaine                                       |
| 118.0873 | 117.079 | -0.001  | 118.0863 | 482 | 63.3 | Betaine                                       |
| 118.0873 | 117.079 | -0.001  | 118.0863 | 480 | 63.3 | Betaine                                       |
| 118.0873 | 117.079 | -0.001  | 118.0863 | 472 | 63.3 | Betaine                                       |
| 118.0873 | 117.079 | -0.001  | 118.0863 | 321 | 85.2 | Betaine                                       |
| 118.0873 | 117.079 | -0.001  | 118.0863 | 320 | 85.2 | Betaine                                       |
| 118.0873 | 117.079 | -0.001  | 118.0863 | 307 | 85.2 | Betaine                                       |
| 118.0873 | 117.079 | -0.001  | 118.0863 | 253 | 44.6 | Betaine                                       |
| 118.0873 | 117.079 | -0.001  | 118.0863 | 252 | 44.6 | Betaine                                       |
| 118.0873 | 117.079 | -0.001  | 118.0863 | 250 | 44.6 | Betaine                                       |
| 186.0588 | 163.084 | 0.0149  | 186.0737 | 158 | 92.3 | N,N-Bis(2-hydroxyethyl)glycine                |
| 186.0588 | 370.196 | 0.0467  | 186.1055 | 65  | 7.6  | Ser-His-Lys                                   |
| 140.0692 | 139.027 | -0.035  | 140.0342 | 120 | 55.4 | 3-Pyridinecarboxylic acid, 1,6-dihydro-6-oxo- |
| 140.0692 | 139.027 | -0.035  | 140.0342 | 116 | 55.4 | 3-Pyridinecarboxylic acid, 1,6-dihydro-6-oxo- |
| 140.0692 | 139.063 | 0.0014  | 140.0706 | 115 | 44.6 | 3-Amino-2,3-dihydrobenzoic acid               |
| 97.0774  | 114.104 | 0.0238  | 97.1012  | 31  | 20.2 | Cyclohexanemethanol                           |
| 97.0774  | 114.104 | 0.0238  | 97.1012  | 31  | 20.2 | Cyclohexanol, 1-methyl-                       |
| 97.0774  | 114.104 | 0.0238  | 97.1012  | 30  | 19.4 | Cyclohexanol, 4-methyl-, trans-               |
| 224.1293 | 223.1   | -0.022  | 224.107  | 143 | 100  | N-Fluorenylacetamide                          |
| 224.1293 | 223.1   | -0.022  | 224.107  | 134 | 100  | N-Fluorenylacetamide                          |
| 224.1293 | 223.084 | -0.0376 | 224.0917 | 221 | 52.8 | N-Acetyl-L-tyrosine                           |
| 224.1293 | 223.084 | -0.0376 | 224.0917 | 220 | 52.8 | N-Acetyl-L-tyrosine                           |
| 224.1293 | 223.084 | -0.0376 | 224.0917 | 210 | 52.8 | N-Acetyl-L-tyrosine                           |
| 224.1293 | 223.084 | -0.0376 | 224.0917 | 291 | 95.6 | N-Acetyl-L-tyrosine                           |
| 224.1293 | 223.084 | -0.0376 | 224.0917 | 277 | 95.6 | N-Acetyl-L-tyrosine                           |
| 224.1293 | 223.084 | -0.0376 | 224.0917 | 242 | 95.6 | N-Acetyl-L-tyrosine                           |
| 224.1293 | 223.084 | -0.0376 | 224.0917 | 278 | 72   | N-Acetyl-L-tyrosine                           |
| 224.1293 | 223.084 | -0.0376 | 224.0917 | 260 | 72   | N-Acetyl-L-tyrosine                           |
| 224.1293 | 446.228 | -0.0081 | 224.1212 | 252 | 21.6 | Tyr-His-Lys                                   |
| 118.0873 | 117.079 | -0.001  | 118.0863 | 421 | 71.1 | Betaine                                       |
| 118.0873 | 117.079 | -0.001  | 118.0863 | 421 | 71.1 | Betaine                                       |

|          |         |         |          |     |      |                                |
|----------|---------|---------|----------|-----|------|--------------------------------|
| 118.0873 | 117.079 | -0.001  | 118.0863 | 416 | 71.1 | Betaine                        |
| 118.0873 | 117.079 | -0.001  | 118.0863 | 517 | 67   | Betaine                        |
| 118.0873 | 117.079 | -0.001  | 118.0863 | 513 | 67   | Betaine                        |
| 118.0873 | 117.079 | -0.001  | 118.0863 | 509 | 67   | Betaine                        |
| 118.0873 | 117.079 | -0.001  | 118.0863 | 288 | 67.9 | Betaine                        |
| 118.0873 | 117.079 | -0.001  | 118.0863 | 287 | 67.9 | Betaine                        |
| 118.0873 | 117.079 | -0.001  | 118.0863 | 283 | 67.9 | Betaine                        |
| 118.0873 | 117.079 | -0.001  | 118.0863 | 373 | 72.5 | Betaine                        |
| 118.0873 | 117.079 | -0.001  | 118.0863 | 373 | 72.5 | Betaine                        |
| 118.0873 | 117.079 | -0.001  | 118.0863 | 363 | 72.5 | Betaine                        |
| 186.0588 | 163.084 | 0.0149  | 186.0737 | 141 | 85.9 | N,N-Bis(2-hydroxyethyl)glycine |
| 186.0588 | 370.196 | 0.0467  | 186.1055 | 77  | 14.1 | Ser-His-Lys                    |
| 140.0692 | 139.063 | 0.0014  | 140.0706 | 89  | 100  | 5-Amino-2-methoxyphenol        |
| 140.0692 | 139.063 | 0.0014  | 140.0706 | 85  | 100  | 5-Amino-2-methoxyphenol        |
| 140.0692 | 139.063 | 0.0014  | 140.0706 | 84  | 100  | 5-Amino-2-methoxyphenol        |
| 224.1293 | 223.106 | -0.0164 | 224.1129 | 97  | 100  | N-Acetyl-D-galactosaminitol    |
| 224.1293 | 223.106 | -0.0164 | 224.1129 | 93  | 100  | N-Acetyl-D-galactosaminitol    |
| 224.1293 | 223.106 | -0.0164 | 224.1129 | 91  | 100  | N-Acetyl-D-galactosaminitol    |
| 224.1293 | 446.228 | -0.0081 | 224.1212 | 94  | 36.8 | Tyr-His-Lys                    |
| 224.1293 | 223.106 | -0.0164 | 224.1129 | 87  | 28.2 | N-Acetyl-D-galactosaminitol    |
| 224.1293 | 223.106 | -0.0164 | 224.1129 | 87  | 28.2 | N-Acetyl-D-galactosaminitol    |
| 224.1293 | 223.084 | -0.0376 | 224.0917 | 215 | 87.8 | N-Acetyl-L-tyrosine            |
| 224.1293 | 223.084 | -0.0376 | 224.0917 | 205 | 87.8 | N-Acetyl-L-tyrosine            |
| 224.1293 | 223.084 | -0.0376 | 224.0917 | 174 | 87.8 | N-Acetyl-L-tyrosine            |
| 224.1293 | 223.084 | -0.0376 | 224.0917 | 273 | 82.7 | N-Acetyl-L-tyrosine            |
| 224.1293 | 223.084 | -0.0376 | 224.0917 | 265 | 82.7 | N-Acetyl-L-tyrosine            |
| 224.1293 | 223.084 | -0.0376 | 224.0917 | 249 | 82.7 | N-Acetyl-L-tyrosine            |
| 118.0873 | 117.079 | -0.001  | 118.0863 | 435 | 97.3 | Betaine                        |
| 118.0873 | 117.079 | -0.001  | 118.0863 | 432 | 97.3 | Betaine                        |
| 118.0873 | 117.079 | -0.001  | 118.0863 | 421 | 97.3 | Betaine                        |
| 118.0873 | 117.079 | -0.001  | 118.0863 | 385 | 97   | Betaine                        |
| 118.0873 | 117.079 | -0.001  | 118.0863 | 368 | 97   | Betaine                        |
| 118.0873 | 117.079 | -0.001  | 118.0863 | 342 | 97   | Betaine                        |
| 118.0873 | 117.079 | -0.001  | 118.0863 | 305 | 73.6 | Betaine                        |
| 118.0873 | 117.079 | -0.001  | 118.0863 | 296 | 73.6 | Betaine                        |
| 118.0873 | 117.079 | -0.001  | 118.0863 | 295 | 73.6 | Betaine                        |
| 186.0588 | 163.084 | 0.0149  | 186.0737 | 122 | 81.3 | N,N-Bis(2-hydroxyethyl)glycine |
| 186.0588 | 163.084 | 0.0149  | 186.0737 | 106 | 81.3 | N,N-Bis(2-hydroxyethyl)glycine |
| 186.0588 | 203.091 | 0.0285  | 186.0873 | 66  | 15.5 | Ala-Asn                        |
| 186.0588 | 163.084 | 0.0149  | 186.0737 | 155 | 100  | N,N-Bis(2-hydroxyethyl)glycine |
| 224.1293 | 446.228 | -0.0081 | 224.1212 | 154 | 45.8 | Tyr-His-Lys                    |
| 224.1293 | 223.084 | -0.0376 | 224.0917 | 150 | 38.7 | N-Acetyl-L-tyrosine            |
| 224.1293 | 223.084 | -0.0376 | 224.0917 | 148 | 38.7 | N-Acetyl-L-tyrosine            |
| 224.1293 | 223.084 | -0.0376 | 224.0917 | 320 | 94.9 | N-Acetyl-L-tyrosine            |
| 224.1293 | 223.084 | -0.0376 | 224.0917 | 306 | 94.9 | N-Acetyl-L-tyrosine            |
| 224.1293 | 223.084 | -0.0376 | 224.0917 | 274 | 94.9 | N-Acetyl-L-tyrosine            |
| 224.1293 | 223.084 | -0.0376 | 224.0917 | 137 | 58.6 | N-Acetyl-L-tyrosine            |



|          |         |         |          |     |      |                                       |
|----------|---------|---------|----------|-----|------|---------------------------------------|
| 224.1293 | 223.084 | -0.0376 | 224.0917 | 130 | 58.6 | N-Acetyl-L-tyrosine                   |
| 224.1293 | 223.084 | -0.0376 | 224.0917 | 130 | 58.6 | N-Acetyl-L-tyrosine                   |
| 118.0873 | 117.079 | -0.001  | 118.0863 | 188 | 100  | Betaine                               |
| 118.0873 | 117.079 | -0.001  | 118.0863 | 4   | 100  | Betaine                               |
| 118.0873 | 117.079 | -0.001  | 118.0863 | 3   | 100  | Betaine                               |
| 118.0873 | 117.079 | -0.001  | 118.0863 | 426 | 73.8 | Betaine                               |
| 118.0873 | 117.079 | -0.001  | 118.0863 | 424 | 73.8 | Betaine                               |
| 118.0873 | 117.079 | -0.001  | 118.0863 | 405 | 73.8 | Betaine                               |
| 118.0873 | 117.079 | -0.001  | 118.0863 | 307 | 74.9 | Betaine                               |
| 118.0873 | 117.079 | -0.001  | 118.0863 | 301 | 74.9 | Betaine                               |
| 118.0873 | 117.079 | -0.001  | 118.0863 | 300 | 74.9 | Betaine                               |
| 118.0873 | 117.079 | -0.001  | 118.0863 | 450 | 98.7 | Betaine                               |
| 118.0873 | 117.079 | -0.001  | 118.0863 | 450 | 98.7 | Betaine                               |
| 118.0873 | 117.079 | -0.001  | 118.0863 | 448 | 98.7 | Betaine                               |
| 186.0588 | 163.084 | 0.0149  | 186.0737 | 110 | 100  | N,N-Bis(2-hydroxyethyl)glycine        |
| 97.0774  | 114.104 | 0.0238  | 97.1012  | 50  | 25.9 | Cyclohexanol, 1-methyl-               |
| 97.0774  | 114.104 | 0.0238  | 97.1012  | 40  | 18.3 | Cycloheptanol                         |
| 97.0774  | 114.104 | 0.0238  | 97.1012  | 38  | 16.9 | Cyclopentanemethanol, .alpha.-methyl- |
| 97.0774  | 114.104 | 0.0238  | 97.1012  | 30  | 23.8 | Cyclohexanol, 1-methyl-               |
| 97.0774  | 114.104 | 0.0238  | 97.1012  | 21  | 17.3 | Cycloheptanol                         |
| 97.0774  | 114.104 | 0.0238  | 97.1012  | 19  | 15.9 | Cyclohexanol, 2-methyl-, trans-       |
| 224.1293 | 223.1   | -0.022  | 224.107  | 171 | 100  | N-Fluorenylacetamide                  |
| 224.1293 | 223.1   | -0.022  | 224.107  | 161 | 100  | N-Fluorenylacetamide                  |
| 224.1293 | 223.084 | -0.0376 | 224.0917 | 179 | 48.5 | N-Acetyl-L-tyrosine                   |
| 224.1293 | 446.228 | -0.0081 | 224.1212 | 174 | 39.1 | Tyr-His-Lys                           |
| 224.1293 | 223.084 | -0.0376 | 224.0917 | 169 | 48.5 | N-Acetyl-L-tyrosine                   |
| 224.1293 | 223.084 | -0.0376 | 224.0917 | 354 | 91.2 | N-Acetyl-L-tyrosine                   |
| 224.1293 | 223.084 | -0.0376 | 224.0917 | 319 | 91.2 | N-Acetyl-L-tyrosine                   |
| 224.1293 | 223.084 | -0.0376 | 224.0917 | 263 | 91.2 | N-Acetyl-L-tyrosine                   |
| 224.1293 | 223.084 | -0.0376 | 224.0917 | 236 | 78.9 | N-Acetyl-L-tyrosine                   |
| 224.1293 | 223.084 | -0.0376 | 224.0917 | 210 | 78.9 | N-Acetyl-L-tyrosine                   |
| 224.1293 | 446.228 | -0.0081 | 224.1212 | 193 | 17.4 | Tyr-His-Lys                           |
| 118.0873 | 117.079 | -0.001  | 118.0863 | 220 | 69.2 | Betaine                               |
| 118.0873 | 117.079 | -0.001  | 118.0863 | 216 | 69.2 | Betaine                               |
| 118.0873 | 117.079 | -0.001  | 118.0863 | 211 | 69.2 | Betaine                               |
| 118.0873 | 117.079 | -0.001  | 118.0863 | 498 | 67.3 | Betaine                               |
| 118.0873 | 117.079 | -0.001  | 118.0863 | 481 | 67.3 | Betaine                               |
| 118.0873 | 117.079 | -0.001  | 118.0863 | 477 | 67.3 | Betaine                               |
| 118.0873 | 117.079 | -0.001  | 118.0863 | 292 | 73.6 | Betaine                               |
| 118.0873 | 117.079 | -0.001  | 118.0863 | 290 | 73.6 | Betaine                               |
| 118.0873 | 117.079 | -0.001  | 118.0863 | 289 | 73.6 | Betaine                               |
| 118.0873 | 117.079 | -0.001  | 118.0863 | 296 | 49.5 | Betaine                               |
| 118.0873 | 117.079 | -0.001  | 118.0863 | 291 | 49.5 | Betaine                               |
| 118.0873 | 117.079 | -0.001  | 118.0863 | 285 | 49.5 | Betaine                               |
| 186.0588 | 370.196 | 0.0467  | 186.1055 | 54  | 100  | Ser-His-Lys                           |
| 97.0774  | 114.104 | 0.0238  | 97.1012  | 37  | 26.6 | Cyclohexanol, 1-methyl-               |

|          |         |         |          |     |      |                                       |
|----------|---------|---------|----------|-----|------|---------------------------------------|
| 97.0774  | 114.104 | 0.0238  | 97.1012  | 26  | 18.3 | Cycloheptanol                         |
| 97.0774  | 114.104 | 0.0238  | 97.1012  | 23  | 16.1 | Cyclopentanemethanol, .alpha.-methyl- |
| 224.1293 | 223.1   | -0.022  | 224.107  | 151 | 100  | N-Fluorenylacетamide                  |
| 224.1293 | 223.1   | -0.022  | 224.107  | 149 | 100  | N-Fluorenylacетamide                  |
| 224.1293 | 223.1   | -0.022  | 224.107  | 147 | 100  | N-Fluorenylacетamide                  |
| 224.1293 | 223.084 | -0.0376 | 224.0917 | 205 | 80.4 | N-Acetyl-L-tyrosine                   |
| 224.1293 | 223.084 | -0.0376 | 224.0917 | 191 | 80.4 | N-Acetyl-L-tyrosine                   |
| 224.1293 | 223.084 | -0.0376 | 224.0917 | 172 | 80.4 | N-Acetyl-L-tyrosine                   |
| 224.1293 | 223.084 | -0.0376 | 224.0917 | 262 | 93.7 | N-Acetyl-L-tyrosine                   |
| 224.1293 | 223.084 | -0.0376 | 224.0917 | 239 | 93.7 | N-Acetyl-L-tyrosine                   |
| 224.1293 | 223.084 | -0.0376 | 224.0917 | 215 | 93.7 | N-Acetyl-L-tyrosine                   |
| 224.1293 | 223.084 | -0.0376 | 224.0917 | 294 | 89.1 | N-Acetyl-L-tyrosine                   |
| 224.1293 | 223.084 | -0.0376 | 224.0917 | 287 | 89.1 | N-Acetyl-L-tyrosine                   |
| 224.1293 | 223.084 | -0.0376 | 224.0917 | 267 | 89.1 | N-Acetyl-L-tyrosine                   |
| 118.0873 | 117.079 | -0.001  | 118.0863 | 573 | 78   | Betaine                               |
| 118.0873 | 117.079 | -0.001  | 118.0863 | 566 | 78   | Betaine                               |
| 118.0873 | 117.079 | -0.001  | 118.0863 | 555 | 78   | Betaine                               |
| 118.0873 | 117.079 | -0.001  | 118.0863 | 252 | 80.8 | Betaine                               |
| 118.0873 | 117.079 | -0.001  | 118.0863 | 249 | 80.8 | Betaine                               |
| 118.0873 | 117.079 | -0.001  | 118.0863 | 241 | 80.8 | Betaine                               |
| 118.0873 | 117.079 | -0.001  | 118.0863 | 360 | 75.3 | Betaine                               |
| 118.0873 | 117.079 | -0.001  | 118.0863 | 358 | 75.3 | Betaine                               |
| 118.0873 | 117.079 | -0.001  | 118.0863 | 349 | 75.3 | Betaine                               |
| 186.0588 | 203.091 | 0.0285  | 186.0873 | 70  | 72.7 | Ala-Asn                               |
| 186.0588 | 163.084 | 0.0149  | 186.0737 | 18  | 14.5 | N,N-Bis(2-hydroxyethyl)glycine        |
| 186.0588 | 203.095 | 0.0325  | 186.0913 | 15  | 12.8 | Indole-3-butyric acid                 |
| 186.0588 | 370.196 | 0.0467  | 186.1055 | 58  | 100  | Ser-His-Lys                           |
| 97.0774  | 114.104 | 0.0238  | 97.1012  | 39  | 21.9 | Cyclohexanol, 1-methyl-               |
| 97.0774  | 114.104 | 0.0238  | 97.1012  | 35  | 18.5 | Cyclohexanol, 4-methyl-, trans-       |
| 97.0774  | 114.104 | 0.0238  | 97.1012  | 33  | 17.1 | Cyclohexanemethanol                   |
| 224.1293 | 223.1   | -0.022  | 224.107  | 124 | 100  | N-Fluorenylacетamide                  |
| 224.1293 | 223.084 | -0.0376 | 224.0917 | 174 | 47.6 | N-Acetyl-L-tyrosine                   |
| 224.1293 | 223.084 | -0.0376 | 224.0917 | 168 | 47.6 | N-Acetyl-L-tyrosine                   |
| 224.1293 | 446.228 | -0.0081 | 224.1212 | 168 | 37.5 | Tyr-His-Lys                           |
| 224.1293 | 223.084 | -0.0376 | 224.0917 | 311 | 95.9 | N-Acetyl-L-tyrosine                   |
| 224.1293 | 223.084 | -0.0376 | 224.0917 | 299 | 95.9 | N-Acetyl-L-tyrosine                   |
| 224.1293 | 223.084 | -0.0376 | 224.0917 | 262 | 95.9 | N-Acetyl-L-tyrosine                   |
| 224.1293 | 223.084 | -0.0376 | 224.0917 | 273 | 86.4 | N-Acetyl-L-tyrosine                   |
| 224.1293 | 223.084 | -0.0376 | 224.0917 | 252 | 86.4 | N-Acetyl-L-tyrosine                   |
| 224.1293 | 223.084 | -0.0376 | 224.0917 | 225 | 86.4 | N-Acetyl-L-tyrosine                   |
| 118.0873 | 117.079 | -0.001  | 118.0863 | 60  | 83   | 5-Aminovaleric acid                   |
| 118.0873 | 117.079 | -0.001  | 118.0863 | 57  | 83   | 5-Aminovaleric acid                   |
| 118.0873 | 117.079 | -0.001  | 118.0863 | 51  | 83   | 5-Aminovaleric acid                   |
| 118.0873 | 117.079 | -0.001  | 118.0863 | 499 | 69   | Betaine                               |
| 118.0873 | 117.079 | -0.001  | 118.0863 | 497 | 69   | Betaine                               |
| 118.0873 | 117.079 | -0.001  | 118.0863 | 492 | 69   | Betaine                               |

|          |         |         |          |     |      |                                 |
|----------|---------|---------|----------|-----|------|---------------------------------|
| 118.0873 | 117.079 | -0.001  | 118.0863 | 354 | 83.8 | Betaine                         |
| 118.0873 | 117.079 | -0.001  | 118.0863 | 343 | 83.8 | Betaine                         |
| 118.0873 | 117.079 | -0.001  | 118.0863 | 322 | 83.8 | Betaine                         |
| 118.0873 | 117.079 | -0.001  | 118.0863 | 331 | 68.7 | Betaine                         |
| 118.0873 | 117.079 | -0.001  | 118.0863 | 328 | 68.7 | Betaine                         |
| 118.0873 | 117.079 | -0.001  | 118.0863 | 323 | 68.7 | Betaine                         |
| 186.0588 | 203.091 | 0.0285  | 186.0873 | 70  | 100  | Ala-Asn                         |
| 186.0588 | 370.196 | 0.0467  | 186.1055 | 68  | 100  | Ser-His-Lys                     |
| 97.0774  | 114.104 | 0.0238  | 97.1012  | 48  | 26.3 | Cyclohexanol, 1-methyl-         |
| 97.0774  | 114.104 | 0.0238  | 97.1012  | 36  | 17.5 | Cyclohexanol, 2-methyl-, trans- |
| 97.0774  | 114.104 | 0.0238  | 97.1012  | 36  | 17.5 | Cycloheptanol                   |
| 97.0774  | 114.104 | 0.0238  | 97.1012  | 38  | 25.3 | Cyclohexanol, 1-methyl-         |
| 97.0774  | 114.104 | 0.0238  | 97.1012  | 27  | 17.4 | Cycloheptanol                   |
| 97.0774  | 114.104 | 0.0238  | 97.1012  | 25  | 16   | Cyclohexanemethanol             |
| 224.1293 | 223.1   | -0.022  | 224.107  | 157 | 84   | N-Fluorenylacetamide            |
| 224.1293 | 223.1   | -0.022  | 224.107  | 151 | 84   | N-Fluorenylacetamide            |
| 224.1293 | 223.1   | -0.022  | 224.107  | 147 | 84   | N-Fluorenylacetamide            |
| 224.1293 | 223.084 | -0.0376 | 224.0917 | 126 | 56.6 | N-Acetyl-L-tyrosine             |
| 224.1293 | 223.106 | -0.0164 | 224.1129 | 119 | 43.4 | N-Acetyl-D-galactosaminitol     |
| 224.1293 | 223.106 | -0.0164 | 224.1129 | 118 | 43.4 | N-Acetyl-D-galactosaminitol     |
| 224.1293 | 223.084 | -0.0376 | 224.0917 | 257 | 100  | N-Acetyl-L-tyrosine             |
| 224.1293 | 223.084 | -0.0376 | 224.0917 | 233 | 100  | N-Acetyl-L-tyrosine             |
| 224.1293 | 223.084 | -0.0376 | 224.0917 | 201 | 100  | N-Acetyl-L-tyrosine             |
| 224.1293 | 223.084 | -0.0376 | 224.0917 | 265 | 88.3 | N-Acetyl-L-tyrosine             |
| 224.1293 | 223.084 | -0.0376 | 224.0917 | 242 | 88.3 | N-Acetyl-L-tyrosine             |
| 224.1293 | 223.084 | -0.0376 | 224.0917 | 211 | 88.3 | N-Acetyl-L-tyrosine             |
| 118.0873 | 117.079 | -0.001  | 118.0863 | 342 | 72.3 | Betaine                         |
| 118.0873 | 117.079 | -0.001  | 118.0863 | 335 | 72.3 | Betaine                         |
| 118.0873 | 117.079 | -0.001  | 118.0863 | 329 | 72.3 | Betaine                         |
| 118.0873 | 117.079 | -0.001  | 118.0863 | 430 | 43.8 | Betaine                         |
| 118.0873 | 117.079 | -0.001  | 118.0863 | 425 | 43.8 | Betaine                         |
| 118.0873 | 117.079 | -0.001  | 118.0863 | 424 | 43.8 | Betaine                         |
| 118.0873 | 117.079 | -0.001  | 118.0863 | 295 | 78.8 | Betaine                         |
| 118.0873 | 117.079 | -0.001  | 118.0863 | 295 | 78.8 | Betaine                         |
| 118.0873 | 117.079 | -0.001  | 118.0863 | 291 | 78.8 | Betaine                         |
| 118.0873 | 117.079 | -0.001  | 118.0863 | 265 | 72.3 | Betaine                         |
| 118.0873 | 117.079 | -0.001  | 118.0863 | 258 | 72.3 | Betaine                         |
| 118.0873 | 117.079 | -0.001  | 118.0863 | 253 | 72.3 | Betaine                         |
| 186.0588 | 163.084 | 0.0149  | 186.0737 | 179 | 100  | N,N-Bis(2-hydroxyethyl)glycine  |
| 186.0588 | 163.084 | 0.0149  | 186.0737 | 136 | 100  | N,N-Bis(2-hydroxyethyl)glycine  |
| 186.0588 | 163.084 | 0.0149  | 186.0737 | 150 | 87.5 | N,N-Bis(2-hydroxyethyl)glycine  |
| 186.0588 | 370.196 | 0.0467  | 186.1055 | 79  | 12.5 | Ser-His-Lys                     |
| 186.0588 | 163.084 | 0.0149  | 186.0737 | 154 | 100  | N,N-Bis(2-hydroxyethyl)glycine  |
| 140.0692 | 139     | 0.04    | 140.11   | 51  | 100  | Tropinone                       |
| 97.0774  | 114.104 | 0.0238  | 97.1012  | 69  | 20.1 | Cyclohexanemethanol             |
| 97.0774  | 114.104 | 0.0238  | 97.1012  | 69  | 20.1 | Cyclohexanol, 4-methyl-, trans- |
| 97.0774  | 114.104 | 0.0238  | 97.1012  | 68  | 19.3 | Cyclohexanol, 1-methyl-         |

|          |         |         |          |     |      |                                |
|----------|---------|---------|----------|-----|------|--------------------------------|
| 224.1293 | 446.228 | -0.0081 | 224.1212 | 167 | 46.8 | Tyr-His-Lys                    |
| 224.1293 | 223.084 | -0.0376 | 224.0917 | 159 | 34.9 | N-Acetyl-L-tyrosine            |
| 224.1293 | 223.084 | -0.0376 | 224.0917 | 150 | 34.9 | N-Acetyl-L-tyrosine            |
| 224.1293 | 223.084 | -0.0376 | 224.0917 | 181 | 87.5 | N-Acetyl-L-tyrosine            |
| 224.1293 | 223.084 | -0.0376 | 224.0917 | 155 | 87.5 | N-Acetyl-L-tyrosine            |
| 224.1293 | 446.228 | -0.0081 | 224.1212 | 110 | 12.5 | Tyr-His-Lys                    |
| 224.1293 | 223.084 | -0.0376 | 224.0917 | 288 | 86.9 | N-Acetyl-L-tyrosine            |
| 224.1293 | 223.084 | -0.0376 | 224.0917 | 275 | 86.9 | N-Acetyl-L-tyrosine            |
| 224.1293 | 223.084 | -0.0376 | 224.0917 | 248 | 86.9 | N-Acetyl-L-tyrosine            |
| 118.0873 | 117.079 | -0.001  | 118.0863 | 313 | 66.2 | Betaine                        |
| 118.0873 | 117.079 | -0.001  | 118.0863 | 308 | 66.2 | Betaine                        |
| 118.0873 | 117.079 | -0.001  | 118.0863 | 296 | 66.2 | Betaine                        |
| 118.0873 | 117.079 | -0.001  | 118.0863 | 439 | 44.1 | Betaine                        |
| 118.0873 | 117.079 | -0.001  | 118.0863 | 435 | 44.1 | Betaine                        |
| 118.0873 | 117.079 | -0.001  | 118.0863 | 431 | 44.1 | Betaine                        |
| 118.0873 | 117.079 | -0.001  | 118.0863 | 372 | 59.1 | Betaine                        |
| 118.0873 | 117.079 | -0.001  | 118.0863 | 368 | 59.1 | Betaine                        |
| 118.0873 | 117.079 | -0.001  | 118.0863 | 366 | 59.1 | Betaine                        |
| 118.0873 | 117.079 | -0.001  | 118.0863 | 291 | 44   | Betaine                        |
| 118.0873 | 117.079 | -0.001  | 118.0863 | 285 | 44   | Betaine                        |
| 118.0873 | 117.079 | -0.001  | 118.0863 | 284 | 44   | Betaine                        |
| 186.0588 | 370.196 | 0.0467  | 186.1055 | 105 | 100  | Ser-His-Lys                    |
| 186.0588 | 163.084 | 0.0149  | 186.0737 | 149 | 100  | N,N-Bis(2-hydroxyethyl)glycine |
| 140.0692 | 139.063 | 0.0014  | 140.0706 | 30  | 100  | 5-Amino-2-methoxyphenol        |
| 97.0774  | 114.104 | 0.0238  | 97.1012  | 69  | 23.8 | Cyclohexanol, 1-methyl-        |
| 97.0774  | 114.104 | 0.0238  | 97.1012  | 61  | 17.8 | Cycloheptanol                  |
| 97.0774  | 114.104 | 0.0238  | 97.1012  | 60  | 17.1 | Cyclohexanemethanol            |
| 195.1236 | 194.115 | -0.0009 | 195.1227 | 276 | 100  | Tetraethylene glycol           |
| 195.1236 | 194.115 | -0.0009 | 195.1227 | 270 | 100  | Tetraethylene glycol           |
| 195.1236 | 194.115 | -0.0009 | 195.1227 | 263 | 100  | Tetraethylene glycol           |
| 195.1236 | 194.115 | -0.0009 | 195.1227 | 278 | 100  | Tetraethylene glycol           |
| 195.1236 | 194.115 | -0.0009 | 195.1227 | 276 | 100  | Tetraethylene glycol           |
| 195.1236 | 194.115 | -0.0009 | 195.1227 | 271 | 100  | Tetraethylene glycol           |
| 195.1236 | 194.115 | -0.0009 | 195.1227 | 261 | 100  | Tetraethylene glycol           |
| 195.1236 | 194.115 | -0.0009 | 195.1227 | 258 | 100  | Tetraethylene glycol           |
| 195.1236 | 194.115 | -0.0009 | 195.1227 | 258 | 100  | Tetraethylene glycol           |
| 118.0873 | 117.079 | -0.001  | 118.0863 | 246 | 100  | Betaine                        |
| 118.0873 | 117.079 | -0.001  | 118.0863 | 243 | 100  | Betaine                        |
| 118.0873 | 117.079 | -0.001  | 118.0863 | 235 | 100  | Betaine                        |
| 118.0873 | 117.079 | -0.001  | 118.0863 | 443 | 34.9 | Betaine                        |
| 118.0873 | 117.079 | -0.001  | 118.0863 | 439 | 34.9 | Betaine                        |
| 118.0873 | 117.079 | -0.001  | 118.0863 | 439 | 34.9 | Betaine                        |
| 118.0873 | 117.079 | -0.001  | 118.0863 | 372 | 100  | Betaine                        |
| 118.0873 | 117.079 | -0.001  | 118.0863 | 369 | 100  | Betaine                        |
| 118.0873 | 117.079 | -0.001  | 118.0863 | 365 | 100  | Betaine                        |
| 118.0873 | 117.079 | -0.001  | 118.0863 | 264 | 75.6 | Betaine                        |
| 118.0873 | 117.079 | -0.001  | 118.0863 | 262 | 75.6 | Betaine                        |

|          |         |         |          |     |      |                                |
|----------|---------|---------|----------|-----|------|--------------------------------|
| 118.0873 | 117.079 | -0.001  | 118.0863 | 256 | 75.6 | Betaine                        |
| 186.0588 | 163.084 | 0.0149  | 186.0737 | 132 | 80.4 | N,N-Bis(2-hydroxyethyl)glycine |
| 186.0588 | 203.091 | 0.0285  | 186.0873 | 95  | 19.6 | Ala-Asn                        |
| 186.0588 | 163.084 | 0.0149  | 186.0737 | 56  | 80.4 | N,N-Bis(2-hydroxyethyl)glycine |
| 186.0588 | 163.084 | 0.0149  | 186.0737 | 150 | 91.4 | N,N-Bis(2-hydroxyethyl)glycine |
| 186.0588 | 163.084 | 0.0149  | 186.0737 | 96  | 91.4 | N,N-Bis(2-hydroxyethyl)glycine |
| 186.0588 | 203.091 | 0.0285  | 186.0873 | 66  | 8.6  | Ala-Asn                        |
| 186.0588 | 370.196 | 0.0467  | 186.1055 | 54  | 100  | Ser-His-Lys                    |
| 186.0588 | 163.084 | 0.0149  | 186.0737 | 176 | 100  | N,N-Bis(2-hydroxyethyl)glycine |
| 224.1293 | 223.1   | -0.022  | 224.107  | 143 | 83.1 | N-Fluorenylacetamide           |
| 224.1293 | 223.1   | -0.022  | 224.107  | 138 | 83.1 | N-Fluorenylacetamide           |
| 224.1293 | 223.1   | -0.022  | 224.107  | 134 | 83.1 | N-Fluorenylacetamide           |
| 224.1293 | 223.084 | -0.0376 | 224.0917 | 160 | 45.6 | N-Acetyl-L-tyrosine            |
| 224.1293 | 446.228 | -0.0081 | 224.1212 | 157 | 40.3 | Tyr-His-Lys                    |
| 224.1293 | 223.084 | -0.0376 | 224.0917 | 150 | 45.6 | N-Acetyl-L-tyrosine            |
| 224.1293 | 223.084 | -0.0376 | 224.0917 | 165 | 100  | N-Acetyl-L-tyrosine            |
| 224.1293 | 223.084 | -0.0376 | 224.0917 | 158 | 100  | N-Acetyl-L-tyrosine            |
| 224.1293 | 223.084 | -0.0376 | 224.0917 | 137 | 100  | N-Acetyl-L-tyrosine            |
| 224.1293 | 223.084 | -0.0376 | 224.0917 | 312 | 94.2 | N-Acetyl-L-tyrosine            |
| 224.1293 | 223.084 | -0.0376 | 224.0917 | 293 | 94.2 | N-Acetyl-L-tyrosine            |
| 224.1293 | 223.084 | -0.0376 | 224.0917 | 257 | 94.2 | N-Acetyl-L-tyrosine            |
| 118.0873 | 117.079 | -0.001  | 118.0863 | 558 | 97.9 | Betaine                        |
| 118.0873 | 117.079 | -0.001  | 118.0863 | 548 | 97.9 | Betaine                        |
| 118.0873 | 117.079 | -0.001  | 118.0863 | 541 | 97.9 | Betaine                        |
| 118.0873 | 117.079 | -0.001  | 118.0863 | 235 | 76.5 | Betaine                        |
| 118.0873 | 117.079 | -0.001  | 118.0863 | 233 | 76.5 | Betaine                        |
| 118.0873 | 117.079 | -0.001  | 118.0863 | 223 | 76.5 | Betaine                        |
| 118.0873 | 117.079 | -0.001  | 118.0863 | 270 | 70.2 | Betaine                        |
| 118.0873 | 117.079 | -0.001  | 118.0863 | 268 | 70.2 | Betaine                        |
| 118.0873 | 117.079 | -0.001  | 118.0863 | 266 | 70.2 | Betaine                        |
| 186.0588 | 163.084 | 0.0149  | 186.0737 | 167 | 100  | N,N-Bis(2-hydroxyethyl)glycine |
| 186.0588 | 163.084 | 0.0149  | 186.0737 | 96  | 100  | N,N-Bis(2-hydroxyethyl)glycine |
| 224.1293 | 223.084 | -0.0376 | 224.0917 | 233 | 71   | N-Acetyl-L-tyrosine            |
| 224.1293 | 223.084 | -0.0376 | 224.0917 | 225 | 71   | N-Acetyl-L-tyrosine            |
| 224.1293 | 446.228 | -0.0081 | 224.1212 | 203 | 19.7 | Tyr-His-Lys                    |
| 224.1293 | 223.084 | -0.0376 | 224.0917 | 302 | 96   | N-Acetyl-L-tyrosine            |
| 224.1293 | 223.084 | -0.0376 | 224.0917 | 266 | 96   | N-Acetyl-L-tyrosine            |
| 224.1293 | 223.084 | -0.0376 | 224.0917 | 219 | 96   | N-Acetyl-L-tyrosine            |
| 224.1293 | 223.084 | -0.0376 | 224.0917 | 267 | 81   | N-Acetyl-L-tyrosine            |
| 224.1293 | 223.084 | -0.0376 | 224.0917 | 253 | 81   | N-Acetyl-L-tyrosine            |
| 224.1293 | 223.084 | -0.0376 | 224.0917 | 227 | 81   | N-Acetyl-L-tyrosine            |
| 118.0873 | 117.079 | -0.001  | 118.0863 | 485 | 44.5 | Betaine                        |
| 118.0873 | 117.079 | -0.001  | 118.0863 | 484 | 44.5 | Betaine                        |
| 118.0873 | 117.079 | -0.001  | 118.0863 | 480 | 44.5 | Betaine                        |
| 118.0873 | 117.079 | -0.001  | 118.0863 | 259 | 81   | Betaine                        |
| 118.0873 | 117.079 | -0.001  | 118.0863 | 255 | 81   | Betaine                        |
| 118.0873 | 117.079 | -0.001  | 118.0863 | 245 | 81   | Betaine                        |

|          |         |         |          |     |      |                                 |
|----------|---------|---------|----------|-----|------|---------------------------------|
| 118.0873 | 117.079 | -0.001  | 118.0863 | 397 | 67.4 | Betaine                         |
| 118.0873 | 117.079 | -0.001  | 118.0863 | 394 | 67.4 | Betaine                         |
| 118.0873 | 117.079 | -0.001  | 118.0863 | 392 | 67.4 | Betaine                         |
| 186.0588 | 163.084 | 0.0149  | 186.0737 | 140 | 100  | N,N-Bis(2-hydroxyethyl)glycine  |
| 186.0588 | 163.084 | 0.0149  | 186.0737 | 159 | 100  | N,N-Bis(2-hydroxyethyl)glycine  |
| 97.0774  | 114.104 | 0.0238  | 97.1012  | 70  | 26.2 | Cyclohexanol, 1-methyl-         |
| 97.0774  | 114.104 | 0.0238  | 97.1012  | 61  | 19.1 | Cycloheptanol                   |
| 97.0774  | 114.104 | 0.0238  | 97.1012  | 53  | 14.2 | Cyclohexanol, 2-methyl-, trans- |
| 224.1293 | 446.228 | -0.0081 | 224.1212 | 131 | 57.9 | Tyr-His-Lys                     |
| 224.1293 | 223.084 | -0.0376 | 224.0917 | 122 | 42.1 | N-Acetyl-L-tyrosine             |
| 224.1293 | 223.084 | -0.0376 | 224.0917 | 121 | 42.1 | N-Acetyl-L-tyrosine             |
| 224.1293 | 223.084 | -0.0376 | 224.0917 | 321 | 94.7 | N-Acetyl-L-tyrosine             |
| 224.1293 | 223.084 | -0.0376 | 224.0917 | 311 | 94.7 | N-Acetyl-L-tyrosine             |
| 224.1293 | 223.084 | -0.0376 | 224.0917 | 299 | 94.7 | N-Acetyl-L-tyrosine             |
| 224.1293 | 223.084 | -0.0376 | 224.0917 | 221 | 77.8 | N-Acetyl-L-tyrosine             |
| 224.1293 | 223.084 | -0.0376 | 224.0917 | 210 | 77.8 | N-Acetyl-L-tyrosine             |
| 224.1293 | 223.084 | -0.0376 | 224.0917 | 198 | 77.8 | N-Acetyl-L-tyrosine             |
| 118.0873 | 117.079 | -0.001  | 118.0863 | 329 | 55.9 | Betaine                         |
| 118.0873 | 117.079 | -0.001  | 118.0863 | 324 | 55.9 | Betaine                         |
| 118.0873 | 117.079 | -0.001  | 118.0863 | 317 | 55.9 | Betaine                         |
| 118.0873 | 117.079 | -0.001  | 118.0863 | 501 | 70.4 | Betaine                         |
| 118.0873 | 117.079 | -0.001  | 118.0863 | 496 | 70.4 | Betaine                         |
| 118.0873 | 117.079 | -0.001  | 118.0863 | 485 | 70.4 | Betaine                         |
| 118.0873 | 117.079 | -0.001  | 118.0863 | 275 | 75.2 | Betaine                         |
| 118.0873 | 117.079 | -0.001  | 118.0863 | 269 | 75.2 | Betaine                         |
| 118.0873 | 117.079 | -0.001  | 118.0863 | 267 | 75.2 | Betaine                         |
| 118.0873 | 117.079 | -0.001  | 118.0863 | 280 | 73.1 | Betaine                         |
| 118.0873 | 117.079 | -0.001  | 118.0863 | 278 | 73.1 | Betaine                         |
| 118.0873 | 117.079 | -0.001  | 118.0863 | 274 | 73.1 | Betaine                         |
| 186.0588 | 370.196 | 0.0467  | 186.1055 | 68  | 100  | Ser-His-Lys                     |
| 186.0588 | 163.084 | 0.0149  | 186.0737 | 155 | 100  | N,N-Bis(2-hydroxyethyl)glycine  |
| 97.0774  | 114.104 | 0.0238  | 97.1012  | 46  | 23.7 | Cyclohexanol, 1-methyl-         |
| 97.0774  | 114.104 | 0.0238  | 97.1012  | 37  | 17.2 | Cycloheptanol                   |
| 97.0774  | 114.104 | 0.0238  | 97.1012  | 35  | 15.9 | Cyclohexanol, 4-methyl-, trans- |
| 224.1293 | 223.1   | -0.022  | 224.107  | 133 | 100  | N-Fluorenylacetamide            |
| 224.1293 | 223.1   | -0.022  | 224.107  | 128 | 100  | N-Fluorenylacetamide            |
| 224.1293 | 223.1   | -0.022  | 224.107  | 126 | 100  | N-Fluorenylacetamide            |
| 224.1293 | 223.084 | -0.0376 | 224.0917 | 146 | 54.5 | N-Acetyl-L-tyrosine             |
| 224.1293 | 446.228 | -0.0081 | 224.1212 | 139 | 41.8 | Tyr-His-Lys                     |
| 224.1293 | 223.084 | -0.0376 | 224.0917 | 133 | 54.5 | N-Acetyl-L-tyrosine             |
| 224.1293 | 223.084 | -0.0376 | 224.0917 | 213 | 91.4 | N-Acetyl-L-tyrosine             |
| 224.1293 | 223.084 | -0.0376 | 224.0917 | 207 | 91.4 | N-Acetyl-L-tyrosine             |
| 224.1293 | 446.228 | -0.0081 | 224.1212 | 129 | 8.6  | Tyr-His-Lys                     |
| 224.1293 | 223.084 | -0.0376 | 224.0917 | 192 | 76.3 | N-Acetyl-L-tyrosine             |
| 224.1293 | 223.084 | -0.0376 | 224.0917 | 178 | 76.3 | N-Acetyl-L-tyrosine             |
| 224.1293 | 223.084 | -0.0376 | 224.0917 | 162 | 76.3 | N-Acetyl-L-tyrosine             |
| 118.0873 | 117.079 | -0.001  | 118.0863 | 306 | 77   | Betaine                         |

|          |         |         |          |     |      |                                               |
|----------|---------|---------|----------|-----|------|-----------------------------------------------|
| 118.0873 | 117.079 | -0.001  | 118.0863 | 299 | 77   | Betaine                                       |
| 118.0873 | 117.079 | -0.001  | 118.0863 | 292 | 77   | Betaine                                       |
| 118.0873 | 117.079 | -0.001  | 118.0863 | 445 | 63.7 | Betaine                                       |
| 118.0873 | 117.079 | -0.001  | 118.0863 | 443 | 63.7 | Betaine                                       |
| 118.0873 | 117.079 | -0.001  | 118.0863 | 433 | 63.7 | Betaine                                       |
| 118.0873 | 117.079 | -0.001  | 118.0863 | 232 | 62.8 | Betaine                                       |
| 118.0873 | 117.079 | -0.001  | 118.0863 | 232 | 62.8 | Betaine                                       |
| 118.0873 | 117.079 | -0.001  | 118.0863 | 227 | 62.8 | Betaine                                       |
| 118.0873 | 117.079 | -0.001  | 118.0863 | 237 | 69.5 | Betaine                                       |
| 118.0873 | 117.079 | -0.001  | 118.0863 | 236 | 69.5 | Betaine                                       |
| 118.0873 | 117.079 | -0.001  | 118.0863 | 231 | 69.5 | Betaine                                       |
| 186.0588 | 203.091 | 0.0285  | 186.0873 | 68  | 100  | Ala-Asn                                       |
| 186.0588 | 370.196 | 0.0467  | 186.1055 | 66  | 100  | Ser-His-Lys                                   |
| 186.0588 | 163.084 | 0.0149  | 186.0737 | 133 | 100  | N,N-Bis(2-hydroxyethyl)glycine                |
| 140.0692 | 139.063 | 0.0014  | 140.0706 | 59  | 52   | 5-Amino-2-methoxyphenol                       |
| 140.0692 | 139.1   | 0.038   | 140.107  | 57  | 48   | Tropinone                                     |
| 140.0692 | 139.1   | 0.038   | 140.107  | 55  | 48   | Tropinone                                     |
| 224.1293 | 446.228 | -0.0081 | 224.1212 | 102 | 68.9 | Tyr-His-Lys                                   |
| 224.1293 | 446.228 | -0.0081 | 224.1212 | 72  | 19.1 | Tyr-His-Lys                                   |
| 224.1293 | 446.228 | -0.0081 | 224.1212 | 58  | 12   | Tyr-His-Lys                                   |
| 224.1293 | 223.1   | -0.022  | 224.107  | 133 | 100  | N-Fluorenylacetamide                          |
| 224.1293 | 223.084 | -0.0376 | 224.0917 | 173 | 100  | N-Acetyl-L-tyrosine                           |
| 224.1293 | 223.084 | -0.0376 | 224.0917 | 155 | 100  | N-Acetyl-L-tyrosine                           |
| 224.1293 | 223.084 | -0.0376 | 224.0917 | 126 | 100  | N-Acetyl-L-tyrosine                           |
| 224.1293 | 223.084 | -0.0376 | 224.0917 | 346 | 94.3 | N-Acetyl-L-tyrosine                           |
| 224.1293 | 223.084 | -0.0376 | 224.0917 | 331 | 94.3 | N-Acetyl-L-tyrosine                           |
| 224.1293 | 223.084 | -0.0376 | 224.0917 | 307 | 94.3 | N-Acetyl-L-tyrosine                           |
| 118.0873 | 117.079 | -0.001  | 118.0863 | 485 | 43   | Betaine                                       |
| 118.0873 | 117.079 | -0.001  | 118.0863 | 478 | 43   | Betaine                                       |
| 118.0873 | 117.079 | -0.001  | 118.0863 | 473 | 43   | Betaine                                       |
| 118.0873 | 117.079 | -0.001  | 118.0863 | 236 | 72.2 | Betaine                                       |
| 118.0873 | 117.079 | -0.001  | 118.0863 | 236 | 72.2 | Betaine                                       |
| 118.0873 | 117.079 | -0.001  | 118.0863 | 231 | 72.2 | Betaine                                       |
| 118.0873 | 117.079 | -0.001  | 118.0863 | 267 | 42.2 | Betaine                                       |
| 118.0873 | 117     | 0       | 118.09   | 261 | 33.2 | Betaine                                       |
| 118.0873 | 117.079 | -0.001  | 118.0863 | 260 | 42.2 | Betaine                                       |
| 186.0588 | 163.084 | 0.0149  | 186.0737 | 153 | 92.1 | N,N-Bis(2-hydroxyethyl)glycine                |
| 186.0588 | 370.196 | 0.0467  | 186.1055 | 63  | 7.9  | Ser-His-Lys                                   |
| 140.0692 | 139.027 | -0.035  | 140.0342 | 19  | 100  | 3-Pyridinecarboxylic acid, 1,6-dihydro-6-oxo- |
| 140.0692 | 139.027 | -0.035  | 140.0342 | 10  | 100  | 3-Pyridinecarboxylic acid, 1,6-dihydro-6-oxo- |
| 140.0692 | 139.027 | -0.035  | 140.0342 | 7   | 100  | 3-Pyridinecarboxylic acid, 1,6-dihydro-6-oxo- |
| 140.0692 | 139.027 | -0.035  | 140.0342 | 80  | 100  | 3-Pyridinecarboxylic acid, 1,6-dihydro-6-oxo- |

|          |         |         |          |     |      |                                               |
|----------|---------|---------|----------|-----|------|-----------------------------------------------|
| 140.0692 | 139.027 | -0.035  | 140.0342 | 79  | 100  | 3-Pyridinecarboxylic acid, 1,6-dihydro-6-oxo- |
| 140.0692 | 139.027 | -0.035  | 140.0342 | 78  | 100  | 3-Pyridinecarboxylic acid, 1,6-dihydro-6-oxo- |
| 97.0774  | 114.104 | 0.0238  | 97.1012  | 134 | 45.3 | Cyclohexanol, 1-methyl-                       |
| 97.0774  | 114.104 | 0.0238  | 97.1012  | 131 | 40   | Cyclohexanemethanol                           |
| 97.0774  | 114.104 | 0.0238  | 97.1012  | 108 | 14.6 | Cyclopentanemethanol, .alpha.-methyl-         |
| 195.1236 | 194.115 | -0.0009 | 195.1227 | 279 | 100  | Tetraethylene glycol                          |
| 195.1236 | 194.115 | -0.0009 | 195.1227 | 278 | 100  | Tetraethylene glycol                          |
| 195.1236 | 194.115 | -0.0009 | 195.1227 | 276 | 100  | Tetraethylene glycol                          |
| 195.1236 | 194.115 | -0.0009 | 195.1227 | 281 | 100  | Tetraethylene glycol                          |
| 195.1236 | 194.115 | -0.0009 | 195.1227 | 279 | 100  | Tetraethylene glycol                          |
| 195.1236 | 194.115 | -0.0009 | 195.1227 | 278 | 100  | Tetraethylene glycol                          |
| 118.0873 | 117.079 | -0.001  | 118.0863 | 262 | 83.6 | Betaine                                       |
| 118.0873 | 117.079 | -0.001  | 118.0863 | 261 | 83.6 | Betaine                                       |
| 118.0873 | 117.079 | -0.001  | 118.0863 | 253 | 83.6 | Betaine                                       |
| 118.0873 | 117.079 | -0.001  | 118.0863 | 491 | 65.7 | Betaine                                       |
| 118.0873 | 117.079 | -0.001  | 118.0863 | 487 | 65.7 | Betaine                                       |
| 118.0873 | 117.079 | -0.001  | 118.0863 | 479 | 65.7 | Betaine                                       |
| 118.0873 | 117.079 | -0.001  | 118.0863 | 227 | 69.4 | Betaine                                       |
| 118.0873 | 117.079 | -0.001  | 118.0863 | 227 | 69.4 | Betaine                                       |
| 118.0873 | 117.079 | -0.001  | 118.0863 | 222 | 69.4 | Betaine                                       |
| 118.0873 | 117.079 | -0.001  | 118.0863 | 310 | 63.7 | Betaine                                       |
| 118.0873 | 117.079 | -0.001  | 118.0863 | 305 | 63.7 | Betaine                                       |
| 118.0873 | 117.079 | -0.001  | 118.0863 | 299 | 63.7 | Betaine                                       |
| 186.0588 | 370.196 | 0.0467  | 186.1055 | 55  | 100  | Ser-His-Lys                                   |
| 186.0588 | 163.084 | 0.0149  | 186.0737 | 141 | 100  | N,N-Bis(2-hydroxyethyl)glycine                |
| 186.0588 | 163.084 | 0.0149  | 186.0737 | 157 | 100  | N,N-Bis(2-hydroxyethyl)glycine                |
| 140.0692 | 139.063 | 0.0014  | 140.0706 | 27  | 100  | 5-Amino-2-methoxyphenol                       |
| 97.0774  | 114.104 | 0.0238  | 97.1012  | 44  | 25.9 | Cyclohexanemethanol                           |
| 97.0774  | 114.104 | 0.0238  | 97.1012  | 42  | 23.9 | Cyclohexanol, 4-methyl-, trans-               |
| 97.0774  | 114.104 | 0.0238  | 97.1012  | 35  | 25.9 | Cyclohexanemethanol                           |
| 224.1293 | 223.1   | -0.022  | 224.107  | 139 | 100  | N-Fluorenylacetamide                          |
| 224.1293 | 223.1   | -0.022  | 224.107  | 133 | 100  | N-Fluorenylacetamide                          |
| 224.1293 | 223.1   | -0.022  | 224.107  | 126 | 100  | N-Fluorenylacetamide                          |
| 224.1293 | 223.084 | -0.0376 | 224.0917 | 199 | 50.3 | N-Acetyl-L-tyrosine                           |
| 224.1293 | 223.084 | -0.0376 | 224.0917 | 188 | 50.3 | N-Acetyl-L-tyrosine                           |
| 224.1293 | 446.228 | -0.0081 | 224.1212 | 186 | 32.5 | Tyr-His-Lys                                   |
| 224.1293 | 223.084 | -0.0376 | 224.0917 | 287 | 97.4 | N-Acetyl-L-tyrosine                           |
| 224.1293 | 223.084 | -0.0376 | 224.0917 | 263 | 97.4 | N-Acetyl-L-tyrosine                           |
| 224.1293 | 223.084 | -0.0376 | 224.0917 | 220 | 97.4 | N-Acetyl-L-tyrosine                           |
| 224.1293 | 223.084 | -0.0376 | 224.0917 | 298 | 89.9 | N-Acetyl-L-tyrosine                           |
| 224.1293 | 223.084 | -0.0376 | 224.0917 | 279 | 89.9 | N-Acetyl-L-tyrosine                           |
| 224.1293 | 223.084 | -0.0376 | 224.0917 | 256 | 89.9 | N-Acetyl-L-tyrosine                           |
| 118.0873 | 117.079 | -0.001  | 118.0863 | 414 | 90   | Betaine                                       |
| 118.0873 | 117.079 | -0.001  | 118.0863 | 411 | 90   | Betaine                                       |



|          |         |         |          |     |      |                                       |
|----------|---------|---------|----------|-----|------|---------------------------------------|
| 118.0873 | 117.079 | -0.001  | 118.0863 | 398 | 90   | Betaine                               |
| 118.0873 | 117.079 | -0.001  | 118.0863 | 459 | 41.6 | Betaine                               |
| 118.0873 | 117.079 | -0.001  | 118.0863 | 458 | 41.6 | Betaine                               |
| 118.0873 | 117.079 | -0.001  | 118.0863 | 450 | 41.6 | Betaine                               |
| 118.0873 | 117.079 | -0.001  | 118.0863 | 331 | 98.8 | Betaine                               |
| 118.0873 | 117.079 | -0.001  | 118.0863 | 318 | 98.8 | Betaine                               |
| 118.0873 | 117.079 | -0.001  | 118.0863 | 297 | 98.8 | Betaine                               |
| 118.0873 | 117.079 | -0.001  | 118.0863 | 221 | 73.2 | Betaine                               |
| 118.0873 | 117.079 | -0.001  | 118.0863 | 218 | 73.2 | Betaine                               |
| 118.0873 | 117.079 | -0.001  | 118.0863 | 213 | 73.2 | Betaine                               |
| 186.0588 | 370.196 | 0.0467  | 186.1055 | 74  | 100  | Ser-His-Lys                           |
| 186.0588 | 163.084 | 0.0149  | 186.0737 | 131 | 100  | N,N-Bis(2-hydroxyethyl)glycine        |
| 140.0692 | 139.1   | 0.038   | 140.107  | 38  | 100  | Tropinone                             |
| 140.0692 | 139.1   | 0.038   | 140.107  | 37  | 100  | Tropinone                             |
| 140.0692 | 139.1   | 0.038   | 140.107  | 36  | 100  | Tropinone                             |
| 224.1293 | 223.084 | -0.0376 | 224.0917 | 178 | 100  | N-Acetyl-L-tyrosine                   |
| 224.1293 | 223.084 | -0.0376 | 224.0917 | 170 | 100  | N-Acetyl-L-tyrosine                   |
| 224.1293 | 223.084 | -0.0376 | 224.0917 | 167 | 100  | N-Acetyl-L-tyrosine                   |
| 224.1293 | 223.084 | -0.0376 | 224.0917 | 161 | 45   | N-Acetyl-L-tyrosine                   |
| 224.1293 | 223.084 | -0.0376 | 224.0917 | 160 | 45   | N-Acetyl-L-tyrosine                   |
| 224.1293 | 223.084 | -0.0376 | 224.0917 | 157 | 45   | N-Acetyl-L-tyrosine                   |
| 224.1293 | 223.084 | -0.0376 | 224.0917 | 362 | 96.5 | N-Acetyl-L-tyrosine                   |
| 224.1293 | 223.084 | -0.0376 | 224.0917 | 347 | 96.5 | N-Acetyl-L-tyrosine                   |
| 224.1293 | 223.084 | -0.0376 | 224.0917 | 305 | 96.5 | N-Acetyl-L-tyrosine                   |
| 224.1293 | 223.084 | -0.0376 | 224.0917 | 308 | 90.6 | N-Acetyl-L-tyrosine                   |
| 224.1293 | 223.084 | -0.0376 | 224.0917 | 293 | 90.6 | N-Acetyl-L-tyrosine                   |
| 224.1293 | 223.084 | -0.0376 | 224.0917 | 254 | 90.6 | N-Acetyl-L-tyrosine                   |
| 118.0873 | 117.079 | -0.001  | 118.0863 | 361 | 28.4 | Betaine                               |
| 118.0873 | 117.079 | -0.001  | 118.0863 | 358 | 28.4 | Betaine                               |
| 118.0873 | 117     | 0       | 118.09   | 357 | 24   | Betaine                               |
| 118.0873 | 117.079 | -0.001  | 118.0863 | 441 | 72.7 | Betaine                               |
| 118.0873 | 117.079 | -0.001  | 118.0863 | 433 | 72.7 | Betaine                               |
| 118.0873 | 117.079 | -0.001  | 118.0863 | 423 | 72.7 | Betaine                               |
| 118.0873 | 117.079 | -0.001  | 118.0863 | 354 | 85.7 | Betaine                               |
| 118.0873 | 117.079 | -0.001  | 118.0863 | 354 | 85.7 | Betaine                               |
| 118.0873 | 117.079 | -0.001  | 118.0863 | 342 | 85.7 | Betaine                               |
| 118.0873 | 117.079 | -0.001  | 118.0863 | 433 | 64.6 | Betaine                               |
| 118.0873 | 117.079 | -0.001  | 118.0863 | 431 | 64.6 | Betaine                               |
| 118.0873 | 117.079 | -0.001  | 118.0863 | 421 | 64.6 | Betaine                               |
| 186.0588 | 163.084 | 0.0149  | 186.0737 | 137 | 100  | N,N-Bis(2-hydroxyethyl)glycine        |
| 97.0774  | 114.104 | 0.0238  | 97.1012  | 90  | 44.5 | Cyclohexanol, 1-methyl-               |
| 97.0774  | 114.104 | 0.0238  | 97.1012  | 80  | 31.4 | Cyclohexanemethanol                   |
| 97.0774  | 114.104 | 0.0238  | 97.1012  | 73  | 24.1 | Cyclopentanemethanol, .alpha.-methyl- |
| 97.0774  | 114.104 | 0.0238  | 97.1012  | 39  | 22.1 | Cyclohexanemethanol                   |
| 97.0774  | 114.104 | 0.0238  | 97.1012  | 37  | 20.4 | Cyclohexanol, 4-methyl-, trans-       |
| 97.0774  | 114.104 | 0.0238  | 97.1012  | 34  | 18   | Cyclohexanol, 1-methyl-               |

|          |         |         |          |     |      |                                 |
|----------|---------|---------|----------|-----|------|---------------------------------|
| 97.0774  | 114.104 | 0.0238  | 97.1012  | 21  | 32.3 | Cyclohexanol, 1-methyl-         |
| 97.0774  | 114.104 | 0.0238  | 97.1012  | 14  | 24.7 | Cycloheptanol                   |
| 97.0774  | 114.104 | 0.0238  | 97.1012  | 12  | 22.8 | Cyclohexanol, 4-methyl-, trans- |
| 224.1293 | 223.084 | -0.0376 | 224.0917 | 230 | 46.1 | N-Acetyl-L-tyrosine             |
| 224.1293 | 223.084 | -0.0376 | 224.0917 | 230 | 46.1 | N-Acetyl-L-tyrosine             |
| 224.1293 | 223.084 | -0.0376 | 224.0917 | 226 | 46.1 | N-Acetyl-L-tyrosine             |
| 224.1293 | 223.084 | -0.0376 | 224.0917 | 274 | 89.5 | N-Acetyl-L-tyrosine             |
| 224.1293 | 223.084 | -0.0376 | 224.0917 | 269 | 89.5 | N-Acetyl-L-tyrosine             |
| 224.1293 | 223.084 | -0.0376 | 224.0917 | 253 | 89.5 | N-Acetyl-L-tyrosine             |
| 224.1293 | 223.084 | -0.0376 | 224.0917 | 209 | 89.6 | N-Acetyl-L-tyrosine             |
| 224.1293 | 223.084 | -0.0376 | 224.0917 | 192 | 89.6 | N-Acetyl-L-tyrosine             |
| 224.1293 | 223.084 | -0.0376 | 224.0917 | 163 | 89.6 | N-Acetyl-L-tyrosine             |
| 118.0873 | 117.079 | -0.001  | 118.0863 | 331 | 59.8 | Betaine                         |
| 118.0873 | 117.079 | -0.001  | 118.0863 | 321 | 59.8 | Betaine                         |
| 118.0873 | 117.079 | -0.001  | 118.0863 | 314 | 59.8 | Betaine                         |
| 118.0873 | 117.079 | -0.001  | 118.0863 | 532 | 67.2 | Betaine                         |
| 118.0873 | 117.079 | -0.001  | 118.0863 | 524 | 67.2 | Betaine                         |
| 118.0873 | 117.079 | -0.001  | 118.0863 | 511 | 67.2 | Betaine                         |
| 118.0873 | 117.079 | -0.001  | 118.0863 | 286 | 76.1 | Betaine                         |
| 118.0873 | 117.079 | -0.001  | 118.0863 | 282 | 76.1 | Betaine                         |
| 118.0873 | 117.079 | -0.001  | 118.0863 | 276 | 76.1 | Betaine                         |
| 118.0873 | 117.079 | -0.001  | 118.0863 | 234 | 65   | Betaine                         |
| 118.0873 | 117.079 | -0.001  | 118.0863 | 232 | 65   | Betaine                         |
| 118.0873 | 117.079 | -0.001  | 118.0863 | 231 | 65   | Betaine                         |
| 186.0588 | 203.091 | 0.0285  | 186.0873 | 75  | 76.9 | Ala-Asn                         |
| 186.0588 | 163.084 | 0.0149  | 186.0737 | 29  | 16.2 | N,N-Bis(2-hydroxyethyl)glycine  |
| 186.0588 | 168.042 | 0.0173  | 186.0761 | 8   | 6.9  | 3-Hydroxy-4-methoxybenzoic acid |
| 186.0588 | 163.084 | 0.0149  | 186.0737 | 141 | 100  | N,N-Bis(2-hydroxyethyl)glycine  |
| 186.0588 | 163.084 | 0.0149  | 186.0737 | 152 | 100  | N,N-Bis(2-hydroxyethyl)glycine  |
| 224.1293 | 223.106 | -0.0164 | 224.1129 | 82  | 100  | N-Acetyl-D-galactosaminitol     |
| 224.1293 | 223.106 | -0.0164 | 224.1129 | 81  | 100  | N-Acetyl-D-galactosaminitol     |
| 224.1293 | 223.106 | -0.0164 | 224.1129 | 81  | 100  | N-Acetyl-D-galactosaminitol     |
| 224.1293 | 223.084 | -0.0376 | 224.0917 | 174 | 54.2 | N-Acetyl-L-tyrosine             |
| 224.1293 | 446.228 | -0.0081 | 224.1212 | 170 | 45.8 | Tyr-His-Lys                     |
| 224.1293 | 223.084 | -0.0376 | 224.0917 | 167 | 54.2 | N-Acetyl-L-tyrosine             |
| 224.1293 | 223.084 | -0.0376 | 224.0917 | 267 | 91.7 | N-Acetyl-L-tyrosine             |
| 224.1293 | 223.084 | -0.0376 | 224.0917 | 236 | 91.7 | N-Acetyl-L-tyrosine             |
| 224.1293 | 223.084 | -0.0376 | 224.0917 | 196 | 91.7 | N-Acetyl-L-tyrosine             |
| 224.1293 | 223.084 | -0.0376 | 224.0917 | 173 | 68.1 | N-Acetyl-L-tyrosine             |
| 224.1293 | 223.084 | -0.0376 | 224.0917 | 165 | 68.1 | N-Acetyl-L-tyrosine             |
| 224.1293 | 223.084 | -0.0376 | 224.0917 | 160 | 68.1 | N-Acetyl-L-tyrosine             |
| 118.0873 | 117.079 | -0.001  | 118.0863 | 220 | 100  | Betaine                         |
| 118.0873 | 117.079 | -0.001  | 118.0863 | 215 | 100  | Betaine                         |
| 118.0873 | 117.079 | -0.001  | 118.0863 | 214 | 100  | Betaine                         |
| 118.0873 | 117.079 | -0.001  | 118.0863 | 416 | 55.2 | Betaine                         |
| 118.0873 | 117.079 | -0.001  | 118.0863 | 415 | 55.2 | Betaine                         |

|          |         |         |          |     |      |                                 |
|----------|---------|---------|----------|-----|------|---------------------------------|
| 118.0873 | 117.079 | -0.001  | 118.0863 | 413 | 55.2 | Betaine                         |
| 118.0873 | 117.079 | -0.001  | 118.0863 | 256 | 69.3 | Betaine                         |
| 118.0873 | 117.079 | -0.001  | 118.0863 | 255 | 69.3 | Betaine                         |
| 118.0873 | 117.079 | -0.001  | 118.0863 | 251 | 69.3 | Betaine                         |
| 118.0873 | 117.079 | -0.001  | 118.0863 | 296 | 73.5 | Betaine                         |
| 118.0873 | 117.079 | -0.001  | 118.0863 | 293 | 73.5 | Betaine                         |
| 118.0873 | 117.079 | -0.001  | 118.0863 | 291 | 73.5 | Betaine                         |
| 140.0692 | 139.063 | 0.0014  | 140.0706 | 40  | 100  | 5-Amino-2-methoxyphenol         |
| 140.0692 | 139.063 | 0.0014  | 140.0706 | 33  | 100  | 5-Amino-2-methoxyphenol         |
| 140.0692 | 139.063 | 0.0014  | 140.0706 | 28  | 100  | 5-Amino-2-methoxyphenol         |
| 186.0588 | 163.084 | 0.0149  | 186.0737 | 89  | 100  | N,N-Bis(2-hydroxyethyl)glycine  |
| 186.0588 | 163.084 | 0.0149  | 186.0737 | 140 | 100  | N,N-Bis(2-hydroxyethyl)glycine  |
| 97.0774  | 114.104 | 0.0238  | 97.1012  | 24  | 33.6 | Cyclohexanol, 1-methyl-         |
| 97.0774  | 114.104 | 0.0238  | 97.1012  | 18  | 26.4 | Cycloheptanol                   |
| 97.0774  | 114.104 | 0.0238  | 97.1012  | 13  | 21.3 | Cyclohexanol, 4-methyl-, trans- |
| 195.1236 | 194.115 | -0.0009 | 195.1227 | 345 | 100  | Tetraethylene glycol            |
| 195.1236 | 194.115 | -0.0009 | 195.1227 | 340 | 100  | Tetraethylene glycol            |
| 195.1236 | 194.115 | -0.0009 | 195.1227 | 334 | 100  | Tetraethylene glycol            |
| 195.1236 | 194.115 | -0.0009 | 195.1227 | 297 | 100  | Tetraethylene glycol            |
| 195.1236 | 194.115 | -0.0009 | 195.1227 | 295 | 100  | Tetraethylene glycol            |
| 195.1236 | 194.115 | -0.0009 | 195.1227 | 294 | 100  | Tetraethylene glycol            |
| 195.1236 | 194.115 | -0.0009 | 195.1227 | 266 | 100  | Tetraethylene glycol            |
| 195.1236 | 194.115 | -0.0009 | 195.1227 | 266 | 100  | Tetraethylene glycol            |
| 195.1236 | 194.115 | -0.0009 | 195.1227 | 266 | 100  | Tetraethylene glycol            |
| 195.1236 | 194.115 | -0.0009 | 195.1227 | 266 | 100  | Tetraethylene glycol            |
| 195.1236 | 194.115 | -0.0009 | 195.1227 | 263 | 100  | Tetraethylene glycol            |
| 195.1236 | 194.115 | -0.0009 | 195.1227 | 262 | 100  | Tetraethylene glycol            |
| 195.1236 | 194.115 | -0.0009 | 195.1227 | 259 | 100  | Tetraethylene glycol            |
| 118.0873 | 117.079 | -0.001  | 118.0863 | 237 | 97.7 | Betaine                         |
| 118.0873 | 117.079 | -0.001  | 118.0863 | 234 | 97.7 | Betaine                         |
| 118.0873 | 117.079 | -0.001  | 118.0863 | 224 | 97.7 | Betaine                         |
| 118.0873 | 117.079 | -0.001  | 118.0863 | 569 | 74.2 | Betaine                         |
| 118.0873 | 117.079 | -0.001  | 118.0863 | 561 | 74.2 | Betaine                         |
| 118.0873 | 117.079 | -0.001  | 118.0863 | 555 | 74.2 | Betaine                         |
| 118.0873 | 117.079 | -0.001  | 118.0863 | 306 | 76.3 | Betaine                         |
| 118.0873 | 117.079 | -0.001  | 118.0863 | 304 | 76.3 | Betaine                         |
| 118.0873 | 117.079 | -0.001  | 118.0863 | 293 | 76.3 | Betaine                         |
| 118.0873 | 117.079 | -0.001  | 118.0863 | 449 | 85.8 | Betaine                         |
| 118.0873 | 117.079 | -0.001  | 118.0863 | 448 | 85.8 | Betaine                         |
| 118.0873 | 117.079 | -0.001  | 118.0863 | 445 | 85.8 | Betaine                         |
| 186.0588 | 163.084 | 0.0149  | 186.0737 | 137 | 76.6 | N,N-Bis(2-hydroxyethyl)glycine  |
| 186.0588 | 163.084 | 0.0149  | 186.0737 | 122 | 76.6 | N,N-Bis(2-hydroxyethyl)glycine  |
| 186.0588 | 203.091 | 0.0285  | 186.0873 | 103 | 19.6 | Ala-Asn                         |
| 97.0774  | 114.104 | 0.0238  | 97.1012  | 30  | 24.5 | Cyclohexanol, 1-methyl-         |
| 97.0774  | 114.104 | 0.0238  | 97.1012  | 22  | 18.3 | Cycloheptanol                   |
| 97.0774  | 114.104 | 0.0238  | 97.1012  | 18  | 15.4 | Cyclohexanol, 2-methyl-, trans- |
| 118.0873 | 117.079 | -0.001  | 118.0863 | 278 | 60.5 | Betaine                         |
| 118.0873 | 117.079 | -0.001  | 118.0863 | 271 | 60.5 | Betaine                         |

|          |         |         |          |     |      |                                       |
|----------|---------|---------|----------|-----|------|---------------------------------------|
| 118.0873 | 117.079 | -0.001  | 118.0863 | 270 | 60.5 | Betaine                               |
| 118.0873 | 117.079 | -0.001  | 118.0863 | 490 | 47   | Betaine                               |
| 118.0873 | 117.079 | -0.001  | 118.0863 | 483 | 47   | Betaine                               |
| 118.0873 | 117.079 | -0.001  | 118.0863 | 480 | 47   | Betaine                               |
| 118.0873 | 117.079 | -0.001  | 118.0863 | 424 | 98.2 | Betaine                               |
| 118.0873 | 117.079 | -0.001  | 118.0863 | 420 | 98.2 | Betaine                               |
| 118.0873 | 117.079 | -0.001  | 118.0863 | 415 | 98.2 | Betaine                               |
| 118.0873 | 117.079 | -0.001  | 118.0863 | 316 | 74.8 | Betaine                               |
| 118.0873 | 117.079 | -0.001  | 118.0863 | 316 | 74.8 | Betaine                               |
| 118.0873 | 117.079 | -0.001  | 118.0863 | 313 | 74.8 | Betaine                               |
| 186.0588 | 163.084 | 0.0149  | 186.0737 | 141 | 100  | N,N-Bis(2-hydroxyethyl)glycine        |
| 97.0774  | 114.104 | 0.0238  | 97.1012  | 26  | 58.6 | Cyclohexanemethanol                   |
| 97.0774  | 114.104 | 0.0238  | 97.1012  | 20  | 58.6 | Cyclohexanemethanol                   |
| 97.0774  | 114.104 | 0.0238  | 97.1012  | 16  | 41.4 | Cyclopentanemethanol, .alpha.-methyl- |
| 97.0774  | 114.104 | 0.0238  | 97.1012  | 25  | 33.6 | Cyclohexanol, 1-methyl-               |
| 97.0774  | 114.104 | 0.0238  | 97.1012  | 19  | 26.4 | Cycloheptanol                         |
| 97.0774  | 114.104 | 0.0238  | 97.1012  | 14  | 21.3 | Cyclohexanol, 4-methyl-, trans-       |
| 224.1293 | 223.084 | -0.0376 | 224.0917 | 184 | 55.3 | N-Acetyl-L-tyrosine                   |
| 224.1293 | 223.084 | -0.0376 | 224.0917 | 165 | 55.3 | N-Acetyl-L-tyrosine                   |
| 224.1293 | 223.1   | -0.022  | 224.107  | 162 | 21.8 | N-Fluorenylacetamide                  |
| 224.1293 | 223.084 | -0.0376 | 224.0917 | 300 | 92.1 | N-Acetyl-L-tyrosine                   |
| 224.1293 | 223.084 | -0.0376 | 224.0917 | 268 | 92.1 | N-Acetyl-L-tyrosine                   |
| 224.1293 | 223.084 | -0.0376 | 224.0917 | 234 | 92.1 | N-Acetyl-L-tyrosine                   |
| 224.1293 | 223.084 | -0.0376 | 224.0917 | 259 | 83.3 | N-Acetyl-L-tyrosine                   |
| 224.1293 | 223.084 | -0.0376 | 224.0917 | 243 | 83.3 | N-Acetyl-L-tyrosine                   |
| 224.1293 | 223.084 | -0.0376 | 224.0917 | 216 | 83.3 | N-Acetyl-L-tyrosine                   |
| 118.0873 | 117.079 | -0.001  | 118.0863 | 306 | 70.4 | Betaine                               |
| 118.0873 | 117.079 | -0.001  | 118.0863 | 301 | 70.4 | Betaine                               |
| 118.0873 | 117.079 | -0.001  | 118.0863 | 285 | 70.4 | Betaine                               |
| 118.0873 | 117.079 | -0.001  | 118.0863 | 542 | 75.2 | Betaine                               |
| 118.0873 | 117.079 | -0.001  | 118.0863 | 536 | 75.2 | Betaine                               |
| 118.0873 | 117.079 | -0.001  | 118.0863 | 525 | 75.2 | Betaine                               |
| 118.0873 | 117.079 | -0.001  | 118.0863 | 361 | 94.6 | Betaine                               |
| 118.0873 | 117.079 | -0.001  | 118.0863 | 342 | 94.6 | Betaine                               |
| 118.0873 | 117.079 | -0.001  | 118.0863 | 310 | 94.6 | Betaine                               |
| 118.0873 | 117.079 | -0.001  | 118.0863 | 399 | 63.6 | Betaine                               |
| 118.0873 | 117.079 | -0.001  | 118.0863 | 398 | 63.6 | Betaine                               |
| 118.0873 | 117.079 | -0.001  | 118.0863 | 396 | 63.6 | Betaine                               |
| 186.0588 | 163.084 | 0.0149  | 186.0737 | 153 | 100  | N,N-Bis(2-hydroxyethyl)glycine        |
| 224.1293 | 223.1   | -0.022  | 224.107  | 134 | 93.1 | N-Fluorenylacetamide                  |
| 224.1293 | 241.117 | -0.0151 | 224.1142 | 34  | 6.9  | (6R)-5,6,7,8-Tetrahydrobiopterin      |
| 224.1293 | 223.084 | -0.0376 | 224.0917 | 152 | 45.7 | N-Acetyl-L-tyrosine                   |
| 224.1293 | 223.084 | -0.0376 | 224.0917 | 150 | 45.7 | N-Acetyl-L-tyrosine                   |
| 224.1293 | 223.084 | -0.0376 | 224.0917 | 149 | 45.7 | N-Acetyl-L-tyrosine                   |
| 224.1293 | 223.084 | -0.0376 | 224.0917 | 269 | 92.8 | N-Acetyl-L-tyrosine                   |
| 224.1293 | 223.084 | -0.0376 | 224.0917 | 262 | 92.8 | N-Acetyl-L-tyrosine                   |

|          |         |         |          |     |      |                                               |
|----------|---------|---------|----------|-----|------|-----------------------------------------------|
| 224.1293 | 223.084 | -0.0376 | 224.0917 | 229 | 92.8 | N-Acetyl-L-tyrosine                           |
| 224.1293 | 223.084 | -0.0376 | 224.0917 | 275 | 87   | N-Acetyl-L-tyrosine                           |
| 224.1293 | 223.084 | -0.0376 | 224.0917 | 251 | 87   | N-Acetyl-L-tyrosine                           |
| 224.1293 | 223.084 | -0.0376 | 224.0917 | 224 | 87   | N-Acetyl-L-tyrosine                           |
| 118.0873 | 117.079 | -0.001  | 118.0863 | 369 | 63   | Betaine                                       |
| 118.0873 | 117.079 | -0.001  | 118.0863 | 362 | 63   | Betaine                                       |
| 118.0873 | 117.079 | -0.001  | 118.0863 | 350 | 63   | Betaine                                       |
| 118.0873 | 117.079 | -0.001  | 118.0863 | 492 | 67.8 | Betaine                                       |
| 118.0873 | 117.079 | -0.001  | 118.0863 | 491 | 67.8 | Betaine                                       |
| 118.0873 | 117.079 | -0.001  | 118.0863 | 480 | 67.8 | Betaine                                       |
| 118.0873 | 117.079 | -0.001  | 118.0863 | 405 | 95.2 | Betaine                                       |
| 118.0873 | 117.079 | -0.001  | 118.0863 | 375 | 95.2 | Betaine                                       |
| 118.0873 | 117.079 | -0.001  | 118.0863 | 347 | 95.2 | Betaine                                       |
| 118.0873 | 117.079 | -0.001  | 118.0863 | 299 | 67.6 | Betaine                                       |
| 118.0873 | 117.079 | -0.001  | 118.0863 | 298 | 67.6 | Betaine                                       |
| 118.0873 | 117.079 | -0.001  | 118.0863 | 296 | 67.6 | Betaine                                       |
| 186.0588 | 163.084 | 0.0149  | 186.0737 | 174 | 100  | N,N-Bis(2-hydroxyethyl)glycine                |
| 140.0692 | 139.063 | 0.0014  | 140.0706 | 78  | 59.3 | 3-Amino-2,3-dihydrobenzoic acid               |
| 140.0692 | 139.027 | -0.035  | 140.0342 | 67  | 40.7 | 3-Pyridinecarboxylic acid, 1,6-dihydro-6-oxo- |
| 140.0692 | 139.027 | -0.035  | 140.0342 | 58  | 40.7 | 3-Pyridinecarboxylic acid, 1,6-dihydro-6-oxo- |
| 97.0774  | 114.104 | 0.0238  | 97.1012  | 18  | 100  | Cyclohexanemethanol                           |
| 195.1236 | 194.115 | -0.0009 | 195.1227 | 139 | 92.3 | Tetraethylene glycol                          |
| 195.1236 | 194.115 | -0.0009 | 195.1227 | 133 | 92.3 | Tetraethylene glycol                          |
| 195.1236 | 194.115 | -0.0009 | 195.1227 | 128 | 92.3 | Tetraethylene glycol                          |
| 195.1236 | 194.115 | -0.0009 | 195.1227 | 332 | 100  | Tetraethylene glycol                          |
| 195.1236 | 194.115 | -0.0009 | 195.1227 | 332 | 100  | Tetraethylene glycol                          |
| 195.1236 | 194.115 | -0.0009 | 195.1227 | 328 | 100  | Tetraethylene glycol                          |
| 195.1236 | 194.115 | -0.0009 | 195.1227 | 263 | 100  | Tetraethylene glycol                          |
| 195.1236 | 194.115 | -0.0009 | 195.1227 | 262 | 100  | Tetraethylene glycol                          |
| 195.1236 | 194.115 | -0.0009 | 195.1227 | 261 | 100  | Tetraethylene glycol                          |
| 118.0873 | 117.079 | -0.001  | 118.0863 | 325 | 69.7 | Betaine                                       |
| 118.0873 | 117.079 | -0.001  | 118.0863 | 320 | 69.7 | Betaine                                       |
| 118.0873 | 117.079 | -0.001  | 118.0863 | 311 | 69.7 | Betaine                                       |
| 118.0873 | 117.079 | -0.001  | 118.0863 | 459 | 57.5 | Betaine                                       |
| 118.0873 | 117.079 | -0.001  | 118.0863 | 457 | 57.5 | Betaine                                       |
| 118.0873 | 117.079 | -0.001  | 118.0863 | 455 | 57.5 | Betaine                                       |
| 118.0873 | 117.079 | -0.001  | 118.0863 | 322 | 61.6 | Betaine                                       |
| 118.0873 | 117.079 | -0.001  | 118.0863 | 317 | 61.6 | Betaine                                       |
| 118.0873 | 117.079 | -0.001  | 118.0863 | 317 | 61.6 | Betaine                                       |
| 118.0873 | 117.079 | -0.001  | 118.0863 | 313 | 64.9 | Betaine                                       |
| 118.0873 | 117.079 | -0.001  | 118.0863 | 306 | 64.9 | Betaine                                       |
| 118.0873 | 117.079 | -0.001  | 118.0863 | 303 | 64.9 | Betaine                                       |
| 140.0692 | 139.1   | 0.038   | 140.107  | 131 | 100  | Tropinone                                     |
| 140.0692 | 139.1   | 0.038   | 140.107  | 129 | 100  | Tropinone                                     |

|          |         |         |          |     |      |                                               |
|----------|---------|---------|----------|-----|------|-----------------------------------------------|
| 140.0692 | 139.1   | 0.038   | 140.107  | 126 | 100  | Tropinone                                     |
| 186.0588 | 370.196 | 0.0467  | 186.1055 | 87  | 100  | Ser-His-Lys                                   |
| 97.0774  | 114.104 | 0.0238  | 97.1012  | 47  | 20.6 | Cyclohexanol, 4-methyl-, trans-               |
| 97.0774  | 114.104 | 0.0238  | 97.1012  | 45  | 20.6 | Cyclohexanol, 4-methyl-, trans-               |
| 97.0774  | 114.104 | 0.0238  | 97.1012  | 43  | 17.4 | Cyclohexanol, 1-methyl-                       |
| 97.0774  | 114.104 | 0.0238  | 97.1012  | 22  | 32   | Cyclohexanol, 1-methyl-                       |
| 97.0774  | 114.104 | 0.0238  | 97.1012  | 16  | 25.2 | Cyclohexanol, 4-methyl-, trans-               |
| 97.0774  | 114.104 | 0.0238  | 97.1012  | 16  | 25.2 | Cyclohexanol, 4-methyl-, trans-               |
| 224.1293 | 446.228 | -0.0081 | 224.1212 | 162 | 50.8 | Tyr-His-Lys                                   |
| 224.1293 | 223.084 | -0.0376 | 224.0917 | 157 | 41   | N-Acetyl-L-tyrosine                           |
| 224.1293 | 223.084 | -0.0376 | 224.0917 | 140 | 41   | N-Acetyl-L-tyrosine                           |
| 224.1293 | 223.084 | -0.0376 | 224.0917 | 259 | 88.8 | N-Acetyl-L-tyrosine                           |
| 224.1293 | 223.084 | -0.0376 | 224.0917 | 243 | 88.8 | N-Acetyl-L-tyrosine                           |
| 224.1293 | 223.084 | -0.0376 | 224.0917 | 220 | 88.8 | N-Acetyl-L-tyrosine                           |
| 224.1293 | 223.084 | -0.0376 | 224.0917 | 268 | 80.1 | N-Acetyl-L-tyrosine                           |
| 224.1293 | 223.084 | -0.0376 | 224.0917 | 244 | 80.1 | N-Acetyl-L-tyrosine                           |
| 224.1293 | 446.228 | -0.0081 | 224.1212 | 222 | 16.9 | Tyr-His-Lys                                   |
| 118.0873 | 117.079 | -0.001  | 118.0863 | 254 | 89.1 | Betaine                                       |
| 118.0873 | 117.079 | -0.001  | 118.0863 | 244 | 89.1 | Betaine                                       |
| 118.0873 | 117.079 | -0.001  | 118.0863 | 242 | 89.1 | Betaine                                       |
| 118.0873 | 117.079 | -0.001  | 118.0863 | 465 | 98.4 | Betaine                                       |
| 118.0873 | 117.079 | -0.001  | 118.0863 | 458 | 98.4 | Betaine                                       |
| 118.0873 | 117.079 | -0.001  | 118.0863 | 449 | 98.4 | Betaine                                       |
| 118.0873 | 117.079 | -0.001  | 118.0863 | 215 | 72.5 | Betaine                                       |
| 118.0873 | 117.079 | -0.001  | 118.0863 | 210 | 72.5 | Betaine                                       |
| 118.0873 | 117.079 | -0.001  | 118.0863 | 204 | 72.5 | Betaine                                       |
| 118.0873 | 117.079 | -0.001  | 118.0863 | 374 | 66.6 | Betaine                                       |
| 118.0873 | 117.079 | -0.001  | 118.0863 | 371 | 66.6 | Betaine                                       |
| 118.0873 | 117.079 | -0.001  | 118.0863 | 366 | 66.6 | Betaine                                       |
| 186.0588 | 163.084 | 0.0149  | 186.0737 | 159 | 100  | N,N-Bis(2-hydroxyethyl)glycine                |
| 140.0692 | 139.063 | 0.0014  | 140.0706 | 94  | 55.3 | 3-Amino-2,3-dihydrobenzoic acid               |
| 140.0692 | 139.063 | 0.0014  | 140.0706 | 75  | 26.8 | 5-Amino-2-methoxyphenol                       |
| 140.0692 | 139.027 | -0.035  | 140.0342 | 63  | 17.9 | 3-Pyridinecarboxylic acid, 1,6-dihydro-6-oxo- |
| 224.1293 | 241.117 | -0.0151 | 224.1142 | 25  | 100  | (6R)-5,6,7,8-Tetrahydrobiopterin              |
| 224.1293 | 223.1   | -0.022  | 224.107  | 101 | 41.3 | N-Fluorenylacetamide                          |
| 224.1293 | 446.228 | -0.0081 | 224.1212 | 98  | 36.5 | Tyr-His-Lys                                   |
| 224.1293 | 223.084 | -0.0376 | 224.0917 | 83  | 22.1 | N-Acetyl-L-tyrosine                           |
| 224.1293 | 223.084 | -0.0376 | 224.0917 | 336 | 97.5 | N-Acetyl-L-tyrosine                           |
| 224.1293 | 223.084 | -0.0376 | 224.0917 | 329 | 97.5 | N-Acetyl-L-tyrosine                           |
| 224.1293 | 223.084 | -0.0376 | 224.0917 | 292 | 97.5 | N-Acetyl-L-tyrosine                           |
| 224.1293 | 223.084 | -0.0376 | 224.0917 | 301 | 91.2 | N-Acetyl-L-tyrosine                           |
| 224.1293 | 223.084 | -0.0376 | 224.0917 | 288 | 91.2 | N-Acetyl-L-tyrosine                           |
| 224.1293 | 223.084 | -0.0376 | 224.0917 | 252 | 91.2 | N-Acetyl-L-tyrosine                           |
| 118.0873 | 117.079 | -0.001  | 118.0863 | 469 | 97.8 | Betaine                                       |
| 118.0873 | 117.079 | -0.001  | 118.0863 | 467 | 97.8 | Betaine                                       |

|          |         |         |          |     |      |                                       |
|----------|---------|---------|----------|-----|------|---------------------------------------|
| 118.0873 | 117.079 | -0.001  | 118.0863 | 463 | 97.8 | Betaine                               |
| 118.0873 | 117.079 | -0.001  | 118.0863 | 355 | 98.6 | Betaine                               |
| 118.0873 | 117.079 | -0.001  | 118.0863 | 350 | 98.6 | Betaine                               |
| 118.0873 | 117.079 | -0.001  | 118.0863 | 336 | 98.6 | Betaine                               |
| 118.0873 | 117.079 | -0.001  | 118.0863 | 333 | 75.7 | Betaine                               |
| 118.0873 | 117.079 | -0.001  | 118.0863 | 330 | 75.7 | Betaine                               |
| 118.0873 | 117.079 | -0.001  | 118.0863 | 328 | 75.7 | Betaine                               |
| 186.0588 | 163.084 | 0.0149  | 186.0737 | 110 | 100  | N,N-Bis(2-hydroxyethyl)glycine        |
| 186.0588 | 163.084 | 0.0149  | 186.0737 | 102 | 100  | N,N-Bis(2-hydroxyethyl)glycine        |
| 97.0774  | 114.104 | 0.0238  | 97.1012  | 38  | 23.9 | Cyclohexanol, 1-methyl-               |
| 97.0774  | 114.104 | 0.0238  | 97.1012  | 28  | 16.9 | Cyclohexanol, 4-methyl-, trans-       |
| 97.0774  | 114.104 | 0.0238  | 97.1012  | 28  | 16.9 | Cycloheptanol                         |
| 97.0774  | 114.104 | 0.0238  | 97.1012  | 44  | 19.2 | Cyclohexanol, 4-methyl-, trans-       |
| 97.0774  | 114.104 | 0.0238  | 97.1012  | 44  | 19.2 | Cyclohexanol, 1-methyl-               |
| 97.0774  | 114.104 | 0.0238  | 97.1012  | 41  | 17   | Cyclopentanemethanol, .alpha.-methyl- |
| 224.1293 | 223.106 | -0.0164 | 224.1129 | 121 | 100  | N-Acetyl-D-galactosaminitol           |
| 224.1293 | 223.106 | -0.0164 | 224.1129 | 114 | 100  | N-Acetyl-D-galactosaminitol           |
| 224.1293 | 223.106 | -0.0164 | 224.1129 | 108 | 100  | N-Acetyl-D-galactosaminitol           |
| 224.1293 | 223.084 | -0.0376 | 224.0917 | 151 | 49.2 | N-Acetyl-L-tyrosine                   |
| 224.1293 | 446.228 | -0.0081 | 224.1212 | 150 | 47.3 | Tyr-His-Lys                           |
| 224.1293 | 223.084 | -0.0376 | 224.0917 | 141 | 49.2 | N-Acetyl-L-tyrosine                   |
| 224.1293 | 223.084 | -0.0376 | 224.0917 | 261 | 93   | N-Acetyl-L-tyrosine                   |
| 224.1293 | 223.084 | -0.0376 | 224.0917 | 248 | 93   | N-Acetyl-L-tyrosine                   |
| 224.1293 | 223.084 | -0.0376 | 224.0917 | 219 | 93   | N-Acetyl-L-tyrosine                   |
| 224.1293 | 223.084 | -0.0376 | 224.0917 | 230 | 90.7 | N-Acetyl-L-tyrosine                   |
| 224.1293 | 223.084 | -0.0376 | 224.0917 | 206 | 90.7 | N-Acetyl-L-tyrosine                   |
| 224.1293 | 223.084 | -0.0376 | 224.0917 | 169 | 90.7 | N-Acetyl-L-tyrosine                   |
| 118.0873 | 117.079 | -0.001  | 118.0863 | 278 | 100  | Betaine                               |
| 118.0873 | 117.079 | -0.001  | 118.0863 | 272 | 100  | Betaine                               |
| 118.0873 | 117.079 | -0.001  | 118.0863 | 259 | 100  | Betaine                               |
| 118.0873 | 117.079 | -0.001  | 118.0863 | 479 | 67.2 | Betaine                               |
| 118.0873 | 117.079 | -0.001  | 118.0863 | 473 | 67.2 | Betaine                               |
| 118.0873 | 117.079 | -0.001  | 118.0863 | 468 | 67.2 | Betaine                               |
| 118.0873 | 117.079 | -0.001  | 118.0863 | 364 | 77   | Betaine                               |
| 118.0873 | 117.079 | -0.001  | 118.0863 | 362 | 77   | Betaine                               |
| 118.0873 | 117.079 | -0.001  | 118.0863 | 359 | 77   | Betaine                               |
| 118.0873 | 117.079 | -0.001  | 118.0863 | 178 | 61.7 | Betaine                               |
| 118.0873 | 117.079 | -0.001  | 118.0863 | 177 | 61.7 | Betaine                               |
| 118.0873 | 117.079 | -0.001  | 118.0863 | 172 | 61.7 | Betaine                               |
| 186.0588 | 163.084 | 0.0149  | 186.0737 | 86  | 54.5 | N,N-Bis(2-hydroxyethyl)glycine        |
| 186.0588 | 203.091 | 0.0285  | 186.0873 | 70  | 31.4 | Ala-Asn                               |
| 186.0588 | 168.042 | 0.0173  | 186.0761 | 16  | 6.1  | 3-Hydroxy-4-methoxybenzoic acid       |
| 186.0588 | 163.084 | 0.0149  | 186.0737 | 158 | 100  | N,N-Bis(2-hydroxyethyl)glycine        |
| 224.1293 | 446.228 | -0.0081 | 224.1212 | 123 | 67.9 | Tyr-His-Lys                           |
| 224.1293 | 223.084 | -0.0376 | 224.0917 | 79  | 14.7 | N-Acetyl-L-tyrosine                   |

|          |         |         |          |     |      |                                               |
|----------|---------|---------|----------|-----|------|-----------------------------------------------|
| 224.1293 | 223.106 | -0.0164 | 224.1129 | 77  | 13.6 | N-Acetyl-D-galactosaminitol                   |
| 224.1293 | 223.084 | -0.0376 | 224.0917 | 307 | 97.2 | N-Acetyl-L-tyrosine                           |
| 224.1293 | 223.084 | -0.0376 | 224.0917 | 286 | 97.2 | N-Acetyl-L-tyrosine                           |
| 224.1293 | 223.084 | -0.0376 | 224.0917 | 242 | 97.2 | N-Acetyl-L-tyrosine                           |
| 224.1293 | 223.084 | -0.0376 | 224.0917 | 214 | 61.1 | N-Acetyl-L-tyrosine                           |
| 224.1293 | 223.084 | -0.0376 | 224.0917 | 198 | 61.1 | N-Acetyl-L-tyrosine                           |
| 224.1293 | 223.084 | -0.0376 | 224.0917 | 196 | 61.1 | N-Acetyl-L-tyrosine                           |
| 118.0873 | 117.079 | -0.001  | 118.0863 | 227 | 81.1 | Betaine                                       |
| 118.0873 | 117.079 | -0.001  | 118.0863 | 226 | 81.1 | Betaine                                       |
| 118.0873 | 117.079 | -0.001  | 118.0863 | 224 | 81.1 | Betaine                                       |
| 118.0873 | 117.079 | -0.001  | 118.0863 | 475 | 66.8 | Betaine                                       |
| 118.0873 | 117.079 | -0.001  | 118.0863 | 472 | 66.8 | Betaine                                       |
| 118.0873 | 117.079 | -0.001  | 118.0863 | 467 | 66.8 | Betaine                                       |
| 118.0873 | 117.079 | -0.001  | 118.0863 | 320 | 83.8 | Betaine                                       |
| 118.0873 | 117.079 | -0.001  | 118.0863 | 317 | 83.8 | Betaine                                       |
| 118.0873 | 117.079 | -0.001  | 118.0863 | 312 | 83.8 | Betaine                                       |
| 118.0873 | 117.079 | -0.001  | 118.0863 | 231 | 39   | Betaine                                       |
| 118.0873 | 117     | 0       | 118.09   | 228 | 34.5 | Betaine                                       |
| 118.0873 | 117.079 | -0.001  | 118.0863 | 225 | 39   | Betaine                                       |
| 186.0588 | 370.196 | 0.0467  | 186.1055 | 41  | 100  | Ser-His-Lys                                   |
| 140.0692 | 139.063 | 0.0014  | 140.0706 | 41  | 100  | 5-Amino-2-methoxyphenol                       |
| 140.0692 | 139.063 | 0.0014  | 140.0706 | 89  | 56.6 | 3-Amino-2,3-dihydrobenzoic acid               |
| 140.0692 | 139.027 | -0.035  | 140.0342 | 82  | 43.4 | 3-Pyridinecarboxylic acid, 1,6-dihydro-6-oxo- |
| 140.0692 | 139.027 | -0.035  | 140.0342 | 75  | 43.4 | 3-Pyridinecarboxylic acid, 1,6-dihydro-6-oxo- |
| 97.0774  | 114.104 | 0.0238  | 97.1012  | 40  | 23.5 | Cyclohexanol, 1-methyl-                       |
| 97.0774  | 114.104 | 0.0238  | 97.1012  | 34  | 18.5 | Cyclohexanol, 4-methyl-, trans-               |
| 97.0774  | 114.104 | 0.0238  | 97.1012  | 31  | 16.3 | Cycloheptanol                                 |
| 224.1293 | 223.084 | -0.0376 | 224.0917 | 185 | 70.9 | N-Acetyl-L-tyrosine                           |
| 224.1293 | 223.084 | -0.0376 | 224.0917 | 168 | 70.9 | N-Acetyl-L-tyrosine                           |
| 224.1293 | 223.084 | -0.0376 | 224.0917 | 166 | 70.9 | N-Acetyl-L-tyrosine                           |
| 224.1293 | 446.228 | -0.0081 | 224.1212 | 95  | 76.9 | Tyr-His-Lys                                   |
| 224.1293 | 223.084 | -0.0376 | 224.0917 | 69  | 23.1 | N-Acetyl-L-tyrosine                           |
| 224.1293 | 223.084 | -0.0376 | 224.0917 | 276 | 97.1 | N-Acetyl-L-tyrosine                           |
| 224.1293 | 223.084 | -0.0376 | 224.0917 | 263 | 97.1 | N-Acetyl-L-tyrosine                           |
| 224.1293 | 223.084 | -0.0376 | 224.0917 | 227 | 97.1 | N-Acetyl-L-tyrosine                           |
| 224.1293 | 223.084 | -0.0376 | 224.0917 | 304 | 90.8 | N-Acetyl-L-tyrosine                           |
| 224.1293 | 223.084 | -0.0376 | 224.0917 | 282 | 90.8 | N-Acetyl-L-tyrosine                           |
| 224.1293 | 223.084 | -0.0376 | 224.0917 | 248 | 90.8 | N-Acetyl-L-tyrosine                           |
| 118.0873 | 117.079 | -0.001  | 118.0863 | 390 | 70.2 | Betaine                                       |
| 118.0873 | 117.079 | -0.001  | 118.0863 | 389 | 70.2 | Betaine                                       |
| 118.0873 | 117.079 | -0.001  | 118.0863 | 382 | 70.2 | Betaine                                       |
| 118.0873 | 117.079 | -0.001  | 118.0863 | 527 | 70.7 | Betaine                                       |
| 118.0873 | 117.079 | -0.001  | 118.0863 | 522 | 70.7 | Betaine                                       |
| 118.0873 | 117.079 | -0.001  | 118.0863 | 516 | 70.7 | Betaine                                       |



|          |         |        |          |     |      |         |
|----------|---------|--------|----------|-----|------|---------|
| 118.0873 | 117.079 | -0.001 | 118.0863 | 305 | 85.4 | Betaine |
| 118.0873 | 117.079 | -0.001 | 118.0863 | 305 | 85.4 | Betaine |
| 118.0873 | 117.079 | -0.001 | 118.0863 | 292 | 85.4 | Betaine |
| 118.0873 | 117.079 | -0.001 | 118.0863 | 265 | 54   | Betaine |
| 118.0873 | 117.079 | -0.001 | 118.0863 | 263 | 54   | Betaine |
| 118.0873 | 117.079 | -0.001 | 118.0863 | 260 | 54   | Betaine |

**Table A8.** List of non-volatile metabolites (LC/MS) for managed population animals. Samples collected in Dec 2011 from multiple animals were pooled. Experiment was conducted using specialized lipids fraction protocol on RP column (refer to Materials and Methods section) in negative ion mode. Only top match is given for each compound.

| Parent m/z | Mass    | Delta (m/z) | Library Precursor m/z | Match Score | Probability (%) | Chem ID                         |
|------------|---------|-------------|-----------------------|-------------|-----------------|---------------------------------|
| 187.0432   | 186.046 | 0.0104      | 187.0536              | 195         | 86.             | Carbimazole                     |
| 187.0432   | 186.046 | 0.0104      | 187.0536              | 190         | 87.             | Carbimazole                     |
| 311.1692   | 310.193 | 0.0314      | 311.2006              | 40          | 10              | Cannabinol                      |
| 311.1692   | 310.193 | 0.0314      | 311.2006              | 45          | 10              | Mestranol                       |
| 311.1692   | 310.193 | 0.0314      | 311.2006              | 45          | 10              | Mestranol                       |
| 311.1692   | 310.193 | 0.0314      | 311.2006              | 34          | 10              | Mestranol                       |
| 297.153    | 296.178 | 0.0319      | 297.1849              | 17          | 10              | 5,8,11,14-Eicosatetraynoic acid |
| 309.1749   | 310.181 | -8E-04      | 309.1741              | 214         | 21.             | (Oxyethylene)lauryl sulfate     |
| 309.1749   | 310.181 | -8E-04      | 309.1741              | 209         | 58.             | (Oxyethylene)lauryl sulfate     |
| 325.1848   | 324.184 | 0.0063      | 325.1911              | 46          | 10              | Quinine                         |
| 325.1848   | 324.184 | 0.0063      | 325.1911              | 53          | 10              | Quinine                         |
| 325.1848   | 324.184 | 0.0063      | 325.1911              | 52          | 10              | Quinine                         |
| 325.1848   | 326.192 | -5E-04      | 325.1843              | 129         | 90.             | Dodecylbenzenesulfonic acid     |
| 325.1848   | 324.184 | 0.0063      | 325.1911              | 40          | 10              | Quinine                         |
| 325.1848   | 324.184 | 0.0063      | 325.1911              | 27          | 10              | Quinine                         |
| 325.1848   | 324.184 | 0.0063      | 325.1911              | 41          | 10              | Quinine                         |
| 325.1848   | 324.184 | 0.0063      | 325.1911              | 36          | 10              | Quinine                         |
| 325.1848   | 324.184 | 0.0063      | 325.1911              | 50          | 10              | Quinine                         |
| 325.1848   | 324.184 | 0.0063      | 325.1911              | 31          | 10              | Quinine                         |
| 311.1692   | 310.193 | 0.0314      | 311.2006              | 60          | 10              | Mestranol                       |
| 311.1692   | 310.193 | 0.0314      | 311.2006              | 60          | 10              | Mestranol                       |
| 311.1692   | 310.193 | 0.0314      | 311.2006              | 31          | 10              | Mestranol                       |
| 325.1848   | 324.184 | 0.0063      | 325.1911              | 37          | 10              | Quinine                         |
| 325.1848   | 324.184 | 0.0063      | 325.1911              | 32          | 10              | Quinine                         |
| 325.1848   | 324.184 | 0.0063      | 325.1911              | 82          | 10              | Quinine                         |
| 311.1692   | 310.116 | -0.045      | 311.1238              | 50          | 10              | .alpha.-L-Glu-L-Tyr             |
| 325.1848   | 324.184 | 0.0063      | 325.1911              | 45          | 10              | Quinine                         |
| 325.1848   | 324.184 | 0.0063      | 325.1911              | 18          | 10              | Quinine                         |
| 325.1848   | 324.184 | 0.0063      | 325.1911              | 39          | 10              | Quinine                         |
| 325.1848   | 324.184 | 0.0063      | 325.1911              | 51          | 73.             | Quinine                         |
| 325.1848   | 324.184 | 0.0063      | 325.1911              | 59          | 10              | Quinine                         |
| 325.1848   | 324.184 | 0.0063      | 325.1911              | 38          | 10              | Quinine                         |
| 325.1848   | 324.184 | 0.0063      | 325.1911              | 37          | 10              | Quinine                         |
| 325.1848   | 324.184 | 0.0063      | 325.1911              | 66          | 59.             | Quinine                         |
| 325.1848   | 324.184 | 0.0063      | 325.1911              | 45          | 10              | Quinine                         |
| 325.1848   | 324.184 | 0.0063      | 325.1911              | 40          | 10              | Quinine                         |
| 325.1848   | 324.184 | 0.0063      | 325.1911              | 50          | 10              | Quinine                         |
| 325.1848   | 324.184 | 0.0063      | 325.1911              | 63          | 10              | Quinine                         |

|          |         |        |          |     |      |                                  |
|----------|---------|--------|----------|-----|------|----------------------------------|
| 325.1848 | 324.184 | 0.0063 | 325.1911 | 35  | 100  | Quinine                          |
| 311.1692 | 310.116 | -0.045 | 311.1238 | 48  | 100  | .alpha.-L-Glu-L-Tyr              |
| 283.2642 | 282.256 | -0.001 | 283.2632 | 25  | 54.2 | 6-Octadecenoic acid, (Z)-        |
| 283.2642 | 282.256 | -0.001 | 283.2632 | 26  | 100  | 6-Octadecenoic acid, (Z)-        |
| 325.1848 | 324.184 | 0.0063 | 325.1911 | 67  | 100  | Quinine                          |
| 325.1848 | 324.184 | 0.0063 | 325.1911 | 57  | 100  | Quinine                          |
| 325.1848 | 324.184 | 0.0063 | 325.1911 | 54  | 100  | Quinine                          |
| 325.1848 | 324.184 | 0.0063 | 325.1911 | 48  | 100  | Quinine                          |
| 311.1692 | 310.193 | 0.0314 | 311.2006 | 56  | 100  | Mestranol                        |
| 311.1692 | 312.176 | -6E-04 | 311.1686 | 38  | 100  | Benzenesulfonic acid, 4-undecyl- |
| 311.1692 | 310.193 | 0.0314 | 311.2006 | 20  | 100  | Mestranol                        |
| 325.1848 | 324.184 | 0.0063 | 325.1911 | 57  | 100  | Quinine                          |
| 325.1848 | 324.184 | 0.0063 | 325.1911 | 46  | 100  | Quinine                          |
| 325.1848 | 324.184 | 0.0063 | 325.1911 | 44  | 100  | Quinine                          |
| 325.1848 | 324.184 | 0.0063 | 325.1911 | 47  | 100  | Quinine                          |
| 325.1848 | 324.184 | 0.0063 | 325.1911 | 49  | 100  | Quinine                          |
| 325.1848 | 324.184 | 0.0063 | 325.1911 | 35  | 100  | Quinine                          |
| 325.1848 | 324.184 | 0.0063 | 325.1911 | 43  | 100  | Quinine                          |
| 325.1848 | 324.184 | 0.0063 | 325.1911 | 54  | 100  | Quinine                          |
| 325.1848 | 324.184 | 0.0063 | 325.1911 | 32  | 100  | Quinine                          |
| 325.1848 | 324.184 | 0.0063 | 325.1911 | 34  | 100  | Quinine                          |
| 325.1848 | 324.184 | 0.0063 | 325.1911 | 30  | 100  | Quinine                          |
| 325.1848 | 324.184 | 0.0063 | 325.1911 | 65  | 100  | Quinine                          |
| 325.1848 | 324.184 | 0.0063 | 325.1911 | 39  | 100  | Quinine                          |
| 325.1848 | 324.184 | 0.0063 | 325.1911 | 79  | 100  | Quinine                          |
| 311.1692 | 310.116 | -0.045 | 311.1238 | 39  | 59.3 | .alpha.-L-Glu-L-Tyr              |
| 112.9862 | 112.027 | 0.0484 | 113.0346 | 97  | 100  | 4,6-Dihydroxypyrimidine          |
| 112.9862 | 112.027 | 0.0484 | 113.0346 | 186 | 100  | 4,6-Dihydroxypyrimidine          |
| 311.1692 | 310.148 | -0.014 | 311.1554 | 37  | 100  | Desmethylocitalopram             |
| 311.1692 | 310.193 | 0.0314 | 311.2006 | 50  | 100  | Mestranol                        |
| 325.1848 | 324.184 | 0.0063 | 325.1911 | 52  | 100  | Quinine                          |
| 325.1848 | 324.184 | 0.0063 | 325.1911 | 55  | 100  | Quinine                          |
| 325.1848 | 324.184 | 0.0063 | 325.1911 | 40  | 100  | Quinine                          |
| 325.1848 | 324.184 | 0.0063 | 325.1911 | 72  | 100  | Quinine                          |
| 311.1692 | 310.193 | 0.0314 | 311.2006 | 17  | 100  | Mestranol                        |
| 112.9862 | 112.027 | 0.0484 | 113.0346 | 74  | 100  | 4,6-Dihydroxypyrimidine          |
| 112.9862 | 112.027 | 0.0484 | 113.0346 | 124 | 100  | 4,6-Dihydroxypyrimidine          |
| 112.9862 | 112.027 | 0.0484 | 113.0346 | 89  | 100  | 4,6-Dihydroxypyrimidine          |
| 112.9862 | 130.027 | 0.0371 | 113.0233 | 191 | 95.7 | Butanedioic acid, methylene-     |
| 325.1848 | 324.184 | 0.0063 | 325.1911 | 27  | 100  | Quinine                          |
| 325.1848 | 324.184 | 0.0063 | 325.1911 | 62  | 100  | Quinine                          |
| 325.1848 | 324.184 | 0.0063 | 325.1911 | 51  | 100  | Quinine                          |
| 112.9862 | 112.027 | 0.0484 | 113.0346 | 70  | 100  | 4,6-Dihydroxypyrimidine          |
| 112.9862 | 112.027 | 0.0484 | 113.0346 | 60  | 100  | 4,6-Dihydroxypyrimidine          |
| 112.9862 | 112.027 | 0.0484 | 113.0346 | 84  | 100  | 4,6-Dihydroxypyrimidine          |
| 325.1848 | 324.184 | 0.0063 | 325.1911 | 35  | 100  | Quinine                          |
| 325.1848 | 324.184 | 0.0063 | 325.1911 | 55  | 100  | Quinine                          |

|          |         |        |          |     |     |                              |
|----------|---------|--------|----------|-----|-----|------------------------------|
| 325.1848 | 324.184 | 0.0063 | 325.1911 | 36  | 100 | Quinine                      |
| 325.1848 | 324.184 | 0.0063 | 325.1911 | 58  | 100 | Quinine                      |
| 112.9862 | 112.027 | 0.0484 | 113.0346 | 93  | 100 | 4,6-Dihydroxypyrimidine      |
| 112.9862 | 112.027 | 0.0484 | 113.0346 | 60  | 100 | 4,6-Dihydroxypyrimidine      |
| 112.9862 | 112.027 | 0.0484 | 113.0346 | 85  | 100 | 4,6-Dihydroxypyrimidine      |
| 311.1692 | 310.193 | 0.0314 | 311.2006 | 40  | 100 | Mestranol                    |
| 112.9862 | 112.027 | 0.0484 | 113.0346 | 96  | 100 | 4,6-Dihydroxypyrimidine      |
| 112.9862 | 112.027 | 0.0484 | 113.0346 | 100 | 100 | 4,6-Dihydroxypyrimidine      |
| 325.1848 | 324.184 | 0.0063 | 325.1911 | 35  | 100 | Quinine                      |
| 325.1848 | 324.184 | 0.0063 | 325.1911 | 59  | 100 | Quinine                      |
| 325.1848 | 324.184 | 0.0063 | 325.1911 | 59  | 100 | Quinine                      |
| 325.1848 | 324.184 | 0.0063 | 325.1911 | 42  | 100 | Quinine                      |
| 112.9862 | 112.027 | 0.0484 | 113.0346 | 106 | 100 | 4,6-Dihydroxypyrimidine      |
| 112.9862 | 112.027 | 0.0484 | 113.0346 | 94  | 100 | 4,6-Dihydroxypyrimidine      |
| 112.9862 | 112.027 | 0.0484 | 113.0346 | 78  | 100 | 4,6-Dihydroxypyrimidine      |
| 112.9862 | 112.027 | 0.0484 | 113.0346 | 97  | 100 | 4,6-Dihydroxypyrimidine      |
| 112.9862 | 112.027 | 0.0484 | 113.0346 | 108 | 100 | 4,6-Dihydroxypyrimidine      |
| 112.9862 | 130.027 | 0.0371 | 113.0233 | 146 | 100 | Butanedioic acid, methylene- |
| 112.9862 | 112.027 | 0.0484 | 113.0346 | 95  | 100 | 4,6-Dihydroxypyrimidine      |
| 112.9862 | 112.027 | 0.0484 | 113.0346 | 103 | 100 | 4,6-Dihydroxypyrimidine      |
| 112.9862 | 112.027 | 0.0484 | 113.0346 | 81  | 100 | 4,6-Dihydroxypyrimidine      |
| 112.9862 | 112.027 | 0.0484 | 113.0346 | 89  | 100 | 4,6-Dihydroxypyrimidine      |
| 112.9862 | 112.027 | 0.0484 | 113.0346 | 218 | 100 | 4,6-Dihydroxypyrimidine      |
| 112.9862 | 112.027 | 0.0484 | 113.0346 | 120 | 100 | 4,6-Dihydroxypyrimidine      |
| 112.9862 | 112.027 | 0.0484 | 113.0346 | 80  | 100 | 4,6-Dihydroxypyrimidine      |

**Table A9.** List of non-volatile metabolites (LC/MS) for managed population animals. Samples collected in Dec 2011 from multiple animals were pooled. Experiment was conducted using specialized lipids fraction protocol on RP column (refer to Materials and Methods section) in negative ion mode. Top three matches are given for each compound.

| Parent m/z | Mass    | Delta (m/z) | Library Precurs or m/z | Match Score | Probability (%) | Chem ID                                      |
|------------|---------|-------------|------------------------|-------------|-----------------|----------------------------------------------|
| 187.0432   | 186.046 | 0.0104      | 187.0536               | 195         | 86.1            | Carbimazole                                  |
| 187.0432   | 186.046 | 0.0104      | 187.0536               | 130         | 13.9            | Ethyl 2-amino-4-methylthiazole-5-carboxylate |
| 187.0432   | 186.046 | 0.0104      | 187.0536               | 127         | 13.9            | Ethyl 2-amino-4-methylthiazole-5-carboxylate |
| 187.0432   | 186.046 | 0.0104      | 187.0536               | 190         | 87.3            | Carbimazole                                  |
| 187.0432   | 186.046 | 0.0104      | 187.0536               | 178         | 87.3            | Carbimazole                                  |
| 187.0432   | 186.046 | 0.0104      | 187.0536               | 120         | 12.7            | Ethyl 2-amino-4-methylthiazole-5-carboxylate |
| 311.1692   | 310.193 | 0.0314      | 311.2006               | 40          | 100             | Cannabinol                                   |
| 311.1692   | 310.193 | 0.0314      | 311.2006               | 45          | 100             | Mestranol                                    |
| 311.1692   | 310.193 | 0.0314      | 311.2006               | 33          | 100             | Mestranol                                    |
| 311.1692   | 310.193 | 0.0314      | 311.2006               | 45          | 100             | Mestranol                                    |
| 311.1692   | 310.193 | 0.0314      | 311.2006               | 34          | 100             | Mestranol                                    |
| 311.1692   | 310.193 | 0.0314      | 311.2006               | 29          | 100             | Mestranol                                    |
| 311.1692   | 310.193 | 0.0314      | 311.2006               | 23          | 100             | Mestranol                                    |
| 297.153    | 296.178 | 0.0319      | 297.1849               | 17          | 100             | 5,8,11,14-Eicosatetraynoic acid              |
| 309.1749   | 310.181 | -0.0008     | 309.1741               | 214         | 21.9            | (Oxyethylene)lauryl sulfate                  |
| 309.1749   | 310.181 | -0.0008     | 309.1741               | 199         | 13.3            | (Oxyethylene)lauryl sulfate                  |
| 309.1749   | 310.181 | -0.0008     | 309.1741               | 198         | 12.8            | (Oxyethylene)lauryl sulfate                  |
| 309.1749   | 310.181 | -0.0008     | 309.1741               | 209         | 58.1            | (Oxyethylene)lauryl sulfate                  |
| 309.1749   | 310.181 | -0.0008     | 309.1741               | 175         | 14.9            | (Oxyethylene)lauryl sulfate                  |
| 309.1749   | 310.181 | -0.0008     | 309.1741               | 174         | 14.3            | (Oxyethylene)lauryl sulfate                  |
| 325.1848   | 324.184 | 0.0063      | 325.1911               | 46          | 100             | Quinine                                      |
| 325.1848   | 324.184 | 0.0063      | 325.1911               | 44          | 100             | Quinine                                      |
| 325.1848   | 324.184 | 0.0063      | 325.1911               | 42          | 100             | Quinine                                      |
| 325.1848   | 324.184 | 0.0063      | 325.1911               | 53          | 100             | Quinine                                      |
| 325.1848   | 324.184 | 0.0063      | 325.1911               | 52          | 100             | Quinine                                      |
| 325.1848   | 324.184 | 0.0063      | 325.1911               | 51          | 100             | Quinine                                      |
| 325.1848   | 324.184 | 0.0063      | 325.1911               | 52          | 100             | Quinine                                      |
| 325.1848   | 324.184 | 0.0063      | 325.1911               | 25          | 100             | Quinine                                      |
| 325.1848   | 326.192 | -0.0005     | 325.1843               | 129         | 90.4            | Dodecylbenzenesulfonic acid                  |
| 325.1848   | 324.184 | 0.0063      | 325.1911               | 48          | 9.6             | Quinine                                      |
| 325.1848   | 324.184 | 0.0063      | 325.1911               | 47          | 9.6             | Quinine                                      |
| 325.1848   | 324.184 | 0.0063      | 325.1911               | 40          | 100             | Quinine                                      |
| 325.1848   | 324.184 | 0.0063      | 325.1911               | 40          | 100             | Quinine                                      |
| 325.1848   | 324.184 | 0.0063      | 325.1911               | 39          | 100             | Quinine                                      |
| 325.1848   | 324.184 | 0.0063      | 325.1911               | 27          | 100             | Quinine                                      |

|          |         |         |          |    |      |                     |
|----------|---------|---------|----------|----|------|---------------------|
| 325.1848 | 324.184 | 0.0063  | 325.1911 | 41 | 100  | Quinine             |
| 325.1848 | 324.184 | 0.0063  | 325.1911 | 36 | 100  | Quinine             |
| 325.1848 | 324.184 | 0.0063  | 325.1911 | 35 | 100  | Quinine             |
| 325.1848 | 324.184 | 0.0063  | 325.1911 | 32 | 100  | Quinine             |
| 325.1848 | 324.184 | 0.0063  | 325.1911 | 50 | 100  | Quinine             |
| 325.1848 | 324.184 | 0.0063  | 325.1911 | 49 | 100  | Quinine             |
| 325.1848 | 324.184 | 0.0063  | 325.1911 | 48 | 100  | Quinine             |
| 325.1848 | 324.184 | 0.0063  | 325.1911 | 31 | 100  | Quinine             |
| 311.1692 | 310.193 | 0.0314  | 311.2006 | 60 | 100  | Mestranol           |
| 311.1692 | 310.193 | 0.0314  | 311.2006 | 52 | 100  | Mestranol           |
| 311.1692 | 310.193 | 0.0314  | 311.2006 | 60 | 100  | Mestranol           |
| 311.1692 | 310.193 | 0.0314  | 311.2006 | 31 | 100  | Mestranol           |
| 311.1692 | 310.193 | 0.0314  | 311.2006 | 29 | 100  | Mestranol           |
| 311.1692 | 310.193 | 0.0314  | 311.2006 | 26 | 100  | Mestranol           |
| 325.1848 | 324.184 | 0.0063  | 325.1911 | 37 | 100  | Quinine             |
| 325.1848 | 324.184 | 0.0063  | 325.1911 | 34 | 100  | Quinine             |
| 325.1848 | 324.184 | 0.0063  | 325.1911 | 32 | 100  | Quinine             |
| 325.1848 | 324.184 | 0.0063  | 325.1911 | 32 | 100  | Quinine             |
| 325.1848 | 324.184 | 0.0063  | 325.1911 | 31 | 100  | Quinine             |
| 325.1848 | 324.184 | 0.0063  | 325.1911 | 30 | 100  | Quinine             |
| 325.1848 | 324.184 | 0.0063  | 325.1911 | 82 | 100  | Quinine             |
| 325.1848 | 324.184 | 0.0063  | 325.1911 | 80 | 100  | Quinine             |
| 325.1848 | 324.184 | 0.0063  | 325.1911 | 78 | 100  | Quinine             |
| 311.1692 | 310.116 | -0.0454 | 311.1238 | 50 | 100  | .alpha.-L-Glu-L-Tyr |
| 325.1848 | 324.184 | 0.0063  | 325.1911 | 45 | 100  | Quinine             |
| 325.1848 | 324.184 | 0.0063  | 325.1911 | 45 | 100  | Quinine             |
| 325.1848 | 324.184 | 0.0063  | 325.1911 | 43 | 100  | Quinine             |
| 325.1848 | 324.184 | 0.0063  | 325.1911 | 18 | 100  | Quinine             |
| 325.1848 | 324.184 | 0.0063  | 325.1911 | 17 | 100  | Quinine             |
| 325.1848 | 324.184 | 0.0063  | 325.1911 | 16 | 100  | Quinine             |
| 325.1848 | 324.184 | 0.0063  | 325.1911 | 39 | 100  | Quinine             |
| 325.1848 | 324.184 | 0.0063  | 325.1911 | 37 | 100  | Quinine             |
| 325.1848 | 324.184 | 0.0063  | 325.1911 | 34 | 100  | Quinine             |
| 325.1848 | 324.184 | 0.0063  | 325.1911 | 51 | 73.2 | Quinine             |
| 325.1848 | 324.184 | 0.0063  | 325.1911 | 50 | 73.2 | Quinine             |
| 325.1848 | 324.184 | 0.0063  | 325.1911 | 47 | 73.2 | Quinine             |
| 325.1848 | 324.184 | 0.0063  | 325.1911 | 59 | 100  | Quinine             |
| 325.1848 | 324.184 | 0.0063  | 325.1911 | 53 | 100  | Quinine             |
| 325.1848 | 324.184 | 0.0063  | 325.1911 | 51 | 100  | Quinine             |
| 325.1848 | 324.184 | 0.0063  | 325.1911 | 38 | 100  | Quinine             |
| 325.1848 | 324.184 | 0.0063  | 325.1911 | 37 | 100  | Quinine             |
| 325.1848 | 324.184 | 0.0063  | 325.1911 | 35 | 100  | Quinine             |
| 325.1848 | 324.184 | 0.0063  | 325.1911 | 37 | 100  | Quinine             |
| 325.1848 | 324.184 | 0.0063  | 325.1911 | 36 | 100  | Quinine             |
| 325.1848 | 324.184 | 0.0063  | 325.1911 | 35 | 100  | Quinine             |
| 325.1848 | 324.184 | 0.0063  | 325.1911 | 66 | 59.3 | Quinine             |
| 325.1848 | 324.184 | 0.0063  | 325.1911 | 64 | 59.3 | Quinine             |

|          |         |         |          |    |      |                                  |
|----------|---------|---------|----------|----|------|----------------------------------|
| 325.1848 | 324.184 | 0.0063  | 325.1911 | 64 | 59.3 | Quinine                          |
| 325.1848 | 324.184 | 0.0063  | 325.1911 | 45 | 100  | Quinine                          |
| 325.1848 | 324.184 | 0.0063  | 325.1911 | 43 | 100  | Quinine                          |
| 325.1848 | 324.184 | 0.0063  | 325.1911 | 38 | 100  | Quinine                          |
| 325.1848 | 324.184 | 0.0063  | 325.1911 | 40 | 100  | Quinine                          |
| 325.1848 | 324.184 | 0.0063  | 325.1911 | 37 | 100  | Quinine                          |
| 325.1848 | 324.184 | 0.0063  | 325.1911 | 32 | 100  | Quinine                          |
| 325.1848 | 324.184 | 0.0063  | 325.1911 | 50 | 100  | Quinine                          |
| 325.1848 | 324.184 | 0.0063  | 325.1911 | 48 | 100  | Quinine                          |
| 325.1848 | 324.184 | 0.0063  | 325.1911 | 47 | 100  | Quinine                          |
| 325.1848 | 324.184 | 0.0063  | 325.1911 | 63 | 100  | Quinine                          |
| 325.1848 | 324.184 | 0.0063  | 325.1911 | 62 | 100  | Quinine                          |
| 325.1848 | 324.184 | 0.0063  | 325.1911 | 62 | 100  | Quinine                          |
| 325.1848 | 324.184 | 0.0063  | 325.1911 | 35 | 100  | Quinine                          |
| 311.1692 | 310.116 | -0.0454 | 311.1238 | 48 | 100  | .alpha.-L-Glu-L-Tyr              |
| 283.2642 | 282.256 | -0.001  | 283.2632 | 25 | 54.2 | 6-Octadecenoic acid, (Z)-        |
| 283.2642 | 282.256 | -0.001  | 283.2632 | 21 | 45.8 | Elaidic acid                     |
| 283.2642 | 282.256 | -0.001  | 283.2632 | 26 | 100  | 6-Octadecenoic acid, (Z)-        |
| 325.1848 | 324.184 | 0.0063  | 325.1911 | 67 | 100  | Quinine                          |
| 325.1848 | 324.184 | 0.0063  | 325.1911 | 66 | 100  | Quinine                          |
| 325.1848 | 324.184 | 0.0063  | 325.1911 | 65 | 100  | Quinine                          |
| 325.1848 | 324.184 | 0.0063  | 325.1911 | 57 | 100  | Quinine                          |
| 325.1848 | 324.184 | 0.0063  | 325.1911 | 53 | 100  | Quinine                          |
| 325.1848 | 324.184 | 0.0063  | 325.1911 | 47 | 100  | Quinine                          |
| 325.1848 | 324.184 | 0.0063  | 325.1911 | 54 | 100  | Quinine                          |
| 325.1848 | 324.184 | 0.0063  | 325.1911 | 52 | 100  | Quinine                          |
| 325.1848 | 324.184 | 0.0063  | 325.1911 | 51 | 100  | Quinine                          |
| 325.1848 | 324.184 | 0.0063  | 325.1911 | 48 | 100  | Quinine                          |
| 325.1848 | 324.184 | 0.0063  | 325.1911 | 46 | 100  | Quinine                          |
| 325.1848 | 324.184 | 0.0063  | 325.1911 | 44 | 100  | Quinine                          |
| 311.1692 | 310.193 | 0.0314  | 311.2006 | 56 | 100  | Mestranol                        |
| 311.1692 | 310.193 | 0.0314  | 311.2006 | 51 | 100  | Mestranol                        |
| 311.1692 | 310.193 | 0.0314  | 311.2006 | 48 | 100  | Mestranol                        |
| 311.1692 | 312.176 | -0.0006 | 311.1686 | 38 | 100  | Benzenesulfonic acid, 4-undecyl- |
| 311.1692 | 310.193 | 0.0314  | 311.2006 | 20 | 100  | Mestranol                        |
| 325.1848 | 324.184 | 0.0063  | 325.1911 | 57 | 100  | Quinine                          |
| 325.1848 | 324.184 | 0.0063  | 325.1911 | 55 | 100  | Quinine                          |
| 325.1848 | 324.184 | 0.0063  | 325.1911 | 53 | 100  | Quinine                          |
| 325.1848 | 324.184 | 0.0063  | 325.1911 | 46 | 100  | Quinine                          |
| 325.1848 | 324.184 | 0.0063  | 325.1911 | 45 | 100  | Quinine                          |
| 325.1848 | 324.184 | 0.0063  | 325.1911 | 41 | 100  | Quinine                          |
| 325.1848 | 324.184 | 0.0063  | 325.1911 | 44 | 100  | Quinine                          |
| 325.1848 | 324.184 | 0.0063  | 325.1911 | 47 | 100  | Quinine                          |
| 325.1848 | 324.184 | 0.0063  | 325.1911 | 43 | 100  | Quinine                          |
| 325.1848 | 324.184 | 0.0063  | 325.1911 | 42 | 100  | Quinine                          |
| 325.1848 | 324.184 | 0.0063  | 325.1911 | 49 | 100  | Quinine                          |

|          |         |         |          |     |      |                         |
|----------|---------|---------|----------|-----|------|-------------------------|
| 325.1848 | 324.184 | 0.0063  | 325.1911 | 47  | 100  | Quinine                 |
| 325.1848 | 324.184 | 0.0063  | 325.1911 | 44  | 100  | Quinine                 |
| 325.1848 | 324.184 | 0.0063  | 325.1911 | 35  | 100  | Quinine                 |
| 325.1848 | 324.184 | 0.0063  | 325.1911 | 43  | 100  | Quinine                 |
| 325.1848 | 324.184 | 0.0063  | 325.1911 | 40  | 100  | Quinine                 |
| 325.1848 | 324.184 | 0.0063  | 325.1911 | 39  | 100  | Quinine                 |
| 325.1848 | 324.184 | 0.0063  | 325.1911 | 54  | 100  | Quinine                 |
| 325.1848 | 324.184 | 0.0063  | 325.1911 | 53  | 100  | Quinine                 |
| 325.1848 | 324.184 | 0.0063  | 325.1911 | 51  | 100  | Quinine                 |
| 325.1848 | 324.184 | 0.0063  | 325.1911 | 32  | 100  | Quinine                 |
| 325.1848 | 324.184 | 0.0063  | 325.1911 | 32  | 100  | Quinine                 |
| 325.1848 | 324.184 | 0.0063  | 325.1911 | 28  | 100  | Quinine                 |
| 325.1848 | 324.184 | 0.0063  | 325.1911 | 34  | 100  | Quinine                 |
| 325.1848 | 324.184 | 0.0063  | 325.1911 | 30  | 100  | Quinine                 |
| 325.1848 | 324.184 | 0.0063  | 325.1911 | 28  | 100  | Quinine                 |
| 325.1848 | 324.184 | 0.0063  | 325.1911 | 26  | 100  | Quinine                 |
| 325.1848 | 324.184 | 0.0063  | 325.1911 | 65  | 100  | Quinine                 |
| 325.1848 | 324.184 | 0.0063  | 325.1911 | 63  | 100  | Quinine                 |
| 325.1848 | 324.184 | 0.0063  | 325.1911 | 58  | 100  | Quinine                 |
| 325.1848 | 324.184 | 0.0063  | 325.1911 | 39  | 100  | Quinine                 |
| 325.1848 | 324.184 | 0.0063  | 325.1911 | 39  | 100  | Quinine                 |
| 325.1848 | 324.184 | 0.0063  | 325.1911 | 38  | 100  | Quinine                 |
| 325.1848 | 324.184 | 0.0063  | 325.1911 | 79  | 100  | Quinine                 |
| 325.1848 | 324.184 | 0.0063  | 325.1911 | 76  | 100  | Quinine                 |
| 325.1848 | 324.184 | 0.0063  | 325.1911 | 76  | 100  | Quinine                 |
| 311.1692 | 310.116 | -0.0454 | 311.1238 | 39  | 59.3 | .alpha.-L-Glu-L-Tyr     |
| 311.1692 | 310.193 | 0.0314  | 311.2006 | 28  | 40.7 | Mestranol               |
| 112.9862 | 112.027 | 0.0484  | 113.0346 | 97  | 100  | 4,6-Dihydroxypyrimidine |
| 112.9862 | 112.027 | 0.0484  | 113.0346 | 96  | 100  | 4,6-Dihydroxypyrimidine |
| 112.9862 | 112.027 | 0.0484  | 113.0346 | 93  | 100  | 4,6-Dihydroxypyrimidine |
| 112.9862 | 112.027 | 0.0484  | 113.0346 | 186 | 100  | 4,6-Dihydroxypyrimidine |
| 112.9862 | 112.027 | 0.0484  | 113.0346 | 166 | 100  | 4,6-Dihydroxypyrimidine |
| 311.1692 | 310.148 | -0.0138 | 311.1554 | 37  | 100  | Desmethylcitalopram     |
| 311.1692 | 310.193 | 0.0314  | 311.2006 | 50  | 100  | Mestranol               |
| 325.1848 | 324.184 | 0.0063  | 325.1911 | 52  | 100  | Quinine                 |
| 325.1848 | 324.184 | 0.0063  | 325.1911 | 52  | 100  | Quinine                 |
| 325.1848 | 324.184 | 0.0063  | 325.1911 | 51  | 100  | Quinine                 |
| 325.1848 | 324.184 | 0.0063  | 325.1911 | 55  | 100  | Quinine                 |
| 325.1848 | 324.184 | 0.0063  | 325.1911 | 54  | 100  | Quinine                 |
| 325.1848 | 324.184 | 0.0063  | 325.1911 | 49  | 100  | Quinine                 |
| 325.1848 | 324.184 | 0.0063  | 325.1911 | 40  | 100  | Quinine                 |
| 325.1848 | 324.184 | 0.0063  | 325.1911 | 72  | 100  | Quinine                 |
| 311.1692 | 310.193 | 0.0314  | 311.2006 | 17  | 100  | Mestranol               |
| 112.9862 | 112.027 | 0.0484  | 113.0346 | 74  | 100  | 4,6-Dihydroxypyrimidine |
| 112.9862 | 112.027 | 0.0484  | 113.0346 | 73  | 100  | 4,6-Dihydroxypyrimidine |
| 112.9862 | 112.027 | 0.0484  | 113.0346 | 72  | 100  | 4,6-Dihydroxypyrimidine |
| 112.9862 | 112.027 | 0.0484  | 113.0346 | 124 | 100  | 4,6-Dihydroxypyrimidine |



|          |         |        |          |     |      |                              |
|----------|---------|--------|----------|-----|------|------------------------------|
| 112.9862 | 112.027 | 0.0484 | 113.0346 | 120 | 100  | 4,6-Dihydroxypyrimidine      |
| 112.9862 | 112.027 | 0.0484 | 113.0346 | 115 | 100  | 4,6-Dihydroxypyrimidine      |
| 112.9862 | 112.027 | 0.0484 | 113.0346 | 89  | 100  | 4,6-Dihydroxypyrimidine      |
| 112.9862 | 112.027 | 0.0484 | 113.0346 | 87  | 100  | 4,6-Dihydroxypyrimidine      |
| 112.9862 | 112.027 | 0.0484 | 113.0346 | 86  | 100  | 4,6-Dihydroxypyrimidine      |
| 112.9862 | 130.027 | 0.0371 | 113.0233 | 191 | 95.7 | Butanedioic acid, methylene- |
| 112.9862 | 130.027 | 0.0371 | 113.0233 | 173 | 95.7 | Butanedioic acid, methylene- |
| 112.9862 | 130.027 | 0.0371 | 113.0233 | 172 | 95.7 | Butanedioic acid, methylene- |
| 325.1848 | 324.184 | 0.0063 | 325.1911 | 27  | 100  | Quinine                      |
| 325.1848 | 324.184 | 0.0063 | 325.1911 | 24  | 100  | Quinine                      |
| 325.1848 | 324.184 | 0.0063 | 325.1911 | 23  | 100  | Quinine                      |
| 325.1848 | 324.184 | 0.0063 | 325.1911 | 62  | 100  | Quinine                      |
| 325.1848 | 324.184 | 0.0063 | 325.1911 | 61  | 100  | Quinine                      |
| 325.1848 | 324.184 | 0.0063 | 325.1911 | 61  | 100  | Quinine                      |
| 325.1848 | 324.184 | 0.0063 | 325.1911 | 51  | 100  | Quinine                      |
| 112.9862 | 112.027 | 0.0484 | 113.0346 | 70  | 100  | 4,6-Dihydroxypyrimidine      |
| 112.9862 | 112.027 | 0.0484 | 113.0346 | 69  | 100  | 4,6-Dihydroxypyrimidine      |
| 112.9862 | 112.027 | 0.0484 | 113.0346 | 68  | 100  | 4,6-Dihydroxypyrimidine      |
| 112.9862 | 112.027 | 0.0484 | 113.0346 | 60  | 100  | 4,6-Dihydroxypyrimidine      |
| 112.9862 | 112.027 | 0.0484 | 113.0346 | 59  | 100  | 4,6-Dihydroxypyrimidine      |
| 112.9862 | 112.027 | 0.0484 | 113.0346 | 58  | 100  | 4,6-Dihydroxypyrimidine      |
| 112.9862 | 112.027 | 0.0484 | 113.0346 | 84  | 100  | 4,6-Dihydroxypyrimidine      |
| 112.9862 | 112.027 | 0.0484 | 113.0346 | 82  | 100  | 4,6-Dihydroxypyrimidine      |
| 112.9862 | 112.027 | 0.0484 | 113.0346 | 82  | 100  | 4,6-Dihydroxypyrimidine      |
| 325.1848 | 324.184 | 0.0063 | 325.1911 | 35  | 100  | Quinine                      |
| 325.1848 | 324.184 | 0.0063 | 325.1911 | 35  | 100  | Quinine                      |
| 325.1848 | 324.184 | 0.0063 | 325.1911 | 35  | 100  | Quinine                      |
| 325.1848 | 324.184 | 0.0063 | 325.1911 | 55  | 100  | Quinine                      |
| 325.1848 | 324.184 | 0.0063 | 325.1911 | 36  | 100  | Quinine                      |
| 325.1848 | 324.184 | 0.0063 | 325.1911 | 58  | 100  | Quinine                      |
| 325.1848 | 324.184 | 0.0063 | 325.1911 | 56  | 100  | Quinine                      |
| 325.1848 | 324.184 | 0.0063 | 325.1911 | 55  | 100  | Quinine                      |
| 112.9862 | 112.027 | 0.0484 | 113.0346 | 93  | 100  | 4,6-Dihydroxypyrimidine      |
| 112.9862 | 112.027 | 0.0484 | 113.0346 | 89  | 100  | 4,6-Dihydroxypyrimidine      |
| 112.9862 | 112.027 | 0.0484 | 113.0346 | 60  | 100  | 4,6-Dihydroxypyrimidine      |
| 112.9862 | 112.027 | 0.0484 | 113.0346 | 59  | 100  | 4,6-Dihydroxypyrimidine      |
| 112.9862 | 112.027 | 0.0484 | 113.0346 | 57  | 100  | 4,6-Dihydroxypyrimidine      |
| 112.9862 | 112.027 | 0.0484 | 113.0346 | 85  | 100  | 4,6-Dihydroxypyrimidine      |
| 112.9862 | 112.027 | 0.0484 | 113.0346 | 82  | 100  | 4,6-Dihydroxypyrimidine      |
| 112.9862 | 112.027 | 0.0484 | 113.0346 | 79  | 100  | 4,6-Dihydroxypyrimidine      |
| 311.1692 | 310.193 | 0.0314 | 311.2006 | 40  | 100  | Mestranol                    |
| 112.9862 | 112.027 | 0.0484 | 113.0346 | 96  | 100  | 4,6-Dihydroxypyrimidine      |
| 112.9862 | 112.027 | 0.0484 | 113.0346 | 95  | 100  | 4,6-Dihydroxypyrimidine      |
| 112.9862 | 112.027 | 0.0484 | 113.0346 | 92  | 100  | 4,6-Dihydroxypyrimidine      |
| 112.9862 | 112.027 | 0.0484 | 113.0346 | 100 | 100  | 4,6-Dihydroxypyrimidine      |
| 112.9862 | 112.027 | 0.0484 | 113.0346 | 100 | 100  | 4,6-Dihydroxypyrimidine      |
| 112.9862 | 112.027 | 0.0484 | 113.0346 | 96  | 100  | 4,6-Dihydroxypyrimidine      |

|          |         |        |          |     |     |                              |
|----------|---------|--------|----------|-----|-----|------------------------------|
| 325.1848 | 324.184 | 0.0063 | 325.1911 | 35  | 100 | Quinine                      |
| 325.1848 | 324.184 | 0.0063 | 325.1911 | 30  | 100 | Quinine                      |
| 325.1848 | 324.184 | 0.0063 | 325.1911 | 27  | 100 | Quinine                      |
| 325.1848 | 324.184 | 0.0063 | 325.1911 | 59  | 100 | Quinine                      |
| 325.1848 | 324.184 | 0.0063 | 325.1911 | 57  | 100 | Quinine                      |
| 325.1848 | 324.184 | 0.0063 | 325.1911 | 55  | 100 | Quinine                      |
| 325.1848 | 324.184 | 0.0063 | 325.1911 | 59  | 100 | Quinine                      |
| 325.1848 | 324.184 | 0.0063 | 325.1911 | 58  | 100 | Quinine                      |
| 325.1848 | 324.184 | 0.0063 | 325.1911 | 57  | 100 | Quinine                      |
| 325.1848 | 324.184 | 0.0063 | 325.1911 | 42  | 100 | Quinine                      |
| 112.9862 | 112.027 | 0.0484 | 113.0346 | 106 | 100 | 4,6-Dihydroxypyrimidine      |
| 112.9862 | 112.027 | 0.0484 | 113.0346 | 94  | 100 | 4,6-Dihydroxypyrimidine      |
| 112.9862 | 112.027 | 0.0484 | 113.0346 | 93  | 100 | 4,6-Dihydroxypyrimidine      |
| 112.9862 | 112.027 | 0.0484 | 113.0346 | 88  | 100 | 4,6-Dihydroxypyrimidine      |
| 112.9862 | 112.027 | 0.0484 | 113.0346 | 78  | 100 | 4,6-Dihydroxypyrimidine      |
| 112.9862 | 112.027 | 0.0484 | 113.0346 | 76  | 100 | 4,6-Dihydroxypyrimidine      |
| 112.9862 | 112.027 | 0.0484 | 113.0346 | 71  | 100 | 4,6-Dihydroxypyrimidine      |
| 112.9862 | 112.027 | 0.0484 | 113.0346 | 97  | 100 | 4,6-Dihydroxypyrimidine      |
| 112.9862 | 112.027 | 0.0484 | 113.0346 | 95  | 100 | 4,6-Dihydroxypyrimidine      |
| 112.9862 | 112.027 | 0.0484 | 113.0346 | 95  | 100 | 4,6-Dihydroxypyrimidine      |
| 112.9862 | 112.027 | 0.0484 | 113.0346 | 108 | 100 | 4,6-Dihydroxypyrimidine      |
| 112.9862 | 112.027 | 0.0484 | 113.0346 | 108 | 100 | 4,6-Dihydroxypyrimidine      |
| 112.9862 | 112.027 | 0.0484 | 113.0346 | 103 | 100 | 4,6-Dihydroxypyrimidine      |
| 112.9862 | 130.027 | 0.0371 | 113.0233 | 146 | 100 | Butanedioic acid, methylene- |
| 112.9862 | 130.027 | 0.0371 | 113.0233 | 129 | 100 | Butanedioic acid, methylene- |
| 112.9862 | 112.027 | 0.0484 | 113.0346 | 95  | 100 | 4,6-Dihydroxypyrimidine      |
| 112.9862 | 112.027 | 0.0484 | 113.0346 | 90  | 100 | 4,6-Dihydroxypyrimidine      |
| 112.9862 | 112.027 | 0.0484 | 113.0346 | 90  | 100 | 4,6-Dihydroxypyrimidine      |
| 112.9862 | 112.027 | 0.0484 | 113.0346 | 103 | 100 | 4,6-Dihydroxypyrimidine      |
| 112.9862 | 112.027 | 0.0484 | 113.0346 | 102 | 100 | 4,6-Dihydroxypyrimidine      |
| 112.9862 | 112.027 | 0.0484 | 113.0346 | 94  | 100 | 4,6-Dihydroxypyrimidine      |
| 112.9862 | 112.027 | 0.0484 | 113.0346 | 81  | 100 | 4,6-Dihydroxypyrimidine      |
| 112.9862 | 112.027 | 0.0484 | 113.0346 | 79  | 100 | 4,6-Dihydroxypyrimidine      |
| 112.9862 | 112.027 | 0.0484 | 113.0346 | 78  | 100 | 4,6-Dihydroxypyrimidine      |
| 112.9862 | 112.027 | 0.0484 | 113.0346 | 89  | 100 | 4,6-Dihydroxypyrimidine      |
| 112.9862 | 112.027 | 0.0484 | 113.0346 | 87  | 100 | 4,6-Dihydroxypyrimidine      |
| 112.9862 | 112.027 | 0.0484 | 113.0346 | 83  | 100 | 4,6-Dihydroxypyrimidine      |
| 112.9862 | 112.027 | 0.0484 | 113.0346 | 218 | 100 | 4,6-Dihydroxypyrimidine      |
| 112.9862 | 112.027 | 0.0484 | 113.0346 | 215 | 100 | 4,6-Dihydroxypyrimidine      |
| 112.9862 | 112.027 | 0.0484 | 113.0346 | 203 | 100 | 4,6-Dihydroxypyrimidine      |
| 112.9862 | 112.027 | 0.0484 | 113.0346 | 120 | 100 | 4,6-Dihydroxypyrimidine      |
| 112.9862 | 112.027 | 0.0484 | 113.0346 | 119 | 100 | 4,6-Dihydroxypyrimidine      |
| 112.9862 | 112.027 | 0.0484 | 113.0346 | 109 | 100 | 4,6-Dihydroxypyrimidine      |
| 112.9862 | 112.027 | 0.0484 | 113.0346 | 80  | 100 | 4,6-Dihydroxypyrimidine      |
| 112.9862 | 112.027 | 0.0484 | 113.0346 | 79  | 100 | 4,6-Dihydroxypyrimidine      |
| 112.9862 | 112.027 | 0.0484 | 113.0346 | 75  | 100 | 4,6-Dihydroxypyrimidine      |

**Table A10.** List of non-volatile metabolites (LC/MS) for wild population animals. Sample was pooled from multiple animals (FB246, FB127, F268, F242, F142 collected in May 2011, 2012). Experiment was conducted using specialized lipids fraction protocol on RP column (refer to Materials and Methods section) in positive ion mode. Only top match is given for each compound.

| Parent m/z | Mass    | Delta (m/z) | Library Precursor m/z | Match Score | Probability (%) | Chem ID                                      |
|------------|---------|-------------|-----------------------|-------------|-----------------|----------------------------------------------|
| 170.1251   | 187.121 | -0.0075     | 170.1176              | 397         | 76              | 7-Keto-8-aminopelargonic acid                |
| 474.2907   | 473.275 | -0.0084     | 474.2823              | 51          | 100             | Leu-Trp-Arg                                  |
| 400.3206   | 400.343 | 0.0215      | 400.3421              | 163         | 21              | Palmitoyl-L-carnitine cation                 |
| 170.1251   | 187.121 | -0.0075     | 170.1176              | 386         | 61              | 7-Keto-8-aminopelargonic acid                |
| 461.3108   | 460.28  | -0.0237     | 461.2871              | 52          | 100             | Trp-Lys-Lys                                  |
| 472.291    | 471.314 | 0.03        | 472.321               | 74          | 100             | Terfenadine                                  |
| 170.1251   | 187.121 | -0.0075     | 170.1176              | 378         | 72              | 7-Keto-8-aminopelargonic acid                |
| 400.3206   | 400.343 | 0.0215      | 400.3421              | 110         | 10              | Palmitoyl-L-carnitine cation                 |
| 472.291    | 471.314 | 0.03        | 472.321               | 108         | 100             | Terfenadine                                  |
| 400.3206   | 400.343 | 0.0215      | 400.3421              | 76          | 57              | Palmitoyl-L-carnitine cation                 |
| 170.1251   | 187.121 | -0.0075     | 170.1176              | 394         | 78              | 7-Keto-8-aminopelargonic acid                |
| 370.2484   | 369.288 | 0.0468      | 370.2952              | 279         | 20              | N-Oleoyl-L-serine                            |
| 414.2746   | 413.239 | -0.0287     | 414.2459              | 84          | 100             | PyroGlu-Arg-Lys                              |
| 472.291    | 471.314 | 0.03        | 472.321               | 102         | 100             | Terfenadine                                  |
| 170.1251   | 187.121 | -0.0075     | 170.1176              | 367         | 45              | 7-Keto-8-aminopelargonic acid                |
| 655.4667   | 654.492 | 0.0324      | 655.4991              | 112         | 38              | Deca(propylene glycol) monobutyl ether       |
| 516.3205   | 515.292 | -0.0216     | 516.2989              | 69          | 100             | Taurocholic acid                             |
| 170.1251   | 169.085 | -0.0327     | 170.0924              | 452         | 49              | L-Histidine, 1-methyl-                       |
| 474.2907   | 473.275 | -0.0084     | 474.2823              | 36          | 55              | Ile-Trp-Arg                                  |
| 170.1251   | 187.121 | -0.0075     | 170.1176              | 420         | 75              | 7-Keto-8-aminopelargonic acid                |
| 400.3206   | 400.343 | 0.0215      | 400.3421              | 112         | 42              | Palmitoyl-L-carnitine cation                 |
| 516.3205   | 515.292 | -0.0216     | 516.2989              | 74          | 100             | Taurocholic acid                             |
| 170.1251   | 187.121 | -0.0075     | 170.1176              | 351         | 57              | 7-Keto-8-aminopelargonic acid                |
| 472.291    | 471.314 | 0.03        | 472.321               | 162         | 100             | Terfenadine                                  |
| 461.2688   | 461     | -0.04       | 461.23                | 6           | 27              | PA 17:0; [M+Na] <sup>+</sup> ; GPA(4:0/13:0) |
| 516.3205   | 515.292 | -0.0216     | 516.2989              | 59          | 100             | Taurocholic acid                             |
| 472.291    | 471.314 | 0.03        | 472.321               | 111         | 100             | Terfenadine                                  |
| 414.2891   | 449.314 | 0.0112      | 414.3003              | 98          | 100             | Glycodeoxycholic acid                        |
| 472.291    | 471.314 | 0.03        | 472.321               | 150         | 100             | Terfenadine                                  |

|          |         |         |          |     |      |                                             |
|----------|---------|---------|----------|-----|------|---------------------------------------------|
| 516.3205 | 515.292 | -0.0216 | 516.2989 | 269 | 100  | Taurocholic acid                            |
| 472.3318 | 471.314 | -0.011  | 472.321  | 181 | 100  | Terfenadine                                 |
| 170.14   | 169.085 | -0.0476 | 170.0924 | 221 | 53.7 | L-Histidine, 3-methyl-                      |
| 391.2847 | 390.277 | -0.0005 | 391.2843 | 89  | 51.2 | Bis(2-ethylhexyl) phthalate                 |
| 419.3154 | 418.308 | 0.0002  | 419.3156 | 196 | 100  | 1,2-Benzenedicarboxylic acid, dinonyl ester |
| 149.0233 | 166.027 | 0       | 149.0233 | 451 | 99   | 1,2-Benzenedicarboxylic acid                |
| 311.1646 | 310.193 | 0.036   | 311.2006 | 99  | 67.9 | Mestranol                                   |
| 279.159  | 278.152 | 0.0001  | 279.1591 | 235 | 96.3 | Dibutyl phthalate                           |
| 516.3205 | 515.292 | -0.0216 | 516.2989 | 261 | 100  | Taurocholic acid                            |
| 170.135  | 187.121 | -0.0174 | 170.1176 | 346 | 66.5 | 7-Keto-8-aminopelargonic acid               |
| 399.2511 | 398.243 | -0.0005 | 399.2506 | 236 | 100  | Tris(butoxyethyl) phosphate                 |
| 163.0749 | 179.095 | 0.0005  | 163.0754 | 250 | 75.1 | 3,4-Methylenedioxyamphetamine               |
| 516.3205 | 515.292 | -0.0216 | 516.2989 | 261 | 100  | Taurocholic acid                            |
| 472.291  | 471.314 | 0.03    | 472.321  | 281 | 100  | Terfenadine                                 |
| 387.1826 | 386     | -0.05   | 387.13   | 229 | 23.8 | 1-O-b-D-glucopyranosyl sinapate             |
| 267.172  | 266.165 | 0       | 267.172  | 221 | 99   | Tributyl phosphate                          |
| 458.3056 | 435.281 | -0.0357 | 458.2699 | 90  | 100  | N-Acetyl-S-geranylgeranyl-L-cysteine        |
| 391.2847 | 390.277 | -0.0005 | 391.2843 | 142 | 49.7 | Diocetyl phthalate                          |
| 404.2083 | 403.207 | 0.006   | 404.214  | 55  | 8.7  | Glu-Gln-Lys                                 |
| 474.2907 | 473.275 | -0.0084 | 474.2823 | 107 | 68.4 | Leu-Trp-Arg                                 |
| 170.1251 | 169.085 | -0.0327 | 170.0924 | 332 | 34.4 | L-Histidine, 1-methyl-                      |
| 518.3165 | 495.332 | 0.0052  | 518.3217 | 89  | 100  | 1-Hexadecanoyl-sn-glycero-3-phosphocholine  |
| 516.3205 | 515.292 | -0.0216 | 516.2989 | 172 | 100  | Taurocholic acid                            |
| 170.1251 | 187.121 | -0.0075 | 170.1176 | 373 | 68.1 | 7-Keto-8-aminopelargonic acid               |
| 472.291  | 471.314 | 0.03    | 472.321  | 197 | 100  | Terfenadine                                 |
| 279.0943 | 278.086 | -0.0009 | 279.0933 | 30  | 100  | Triphenylphosphine oxide                    |
| 387.1826 | 386     | -0.05   | 387.13   | 241 | 22.8 | 1-O-b-D-glucopyranosyl sinapate             |
| 288.2521 | 287.196 | -0.049  | 288.203  | 122 | 26.1 | Leu-Arg                                     |
| 516.3205 | 515.292 | -0.0216 | 516.2989 | 199 | 100  | Taurocholic acid                            |
| 474.2907 | 473.275 | -0.0084 | 474.2823 | 180 | 62.2 | Leu-Trp-Arg                                 |
| 655.4667 | 654.492 | 0.0324  | 655.4991 | 198 | 19.8 | Deca(propylene glycol) monobutyl ether      |
| 170.1251 | 187.121 | -0.0075 | 170.1176 | 383 | 71.5 | 7-Keto-8-aminopelargonic acid               |
| 370.2484 | 369.288 | 0.0468  | 370.2952 | 295 | 18.9 | N-Oleoyl-L-serine                           |
| 249.1125 | 249.139 | 0.0261  | 249.1386 | 217 | 69.6 | 1H-Pyrazolium, 1,2-dimethyl-3,5-diphenyl-   |

|          |         |         |          |     |      |                                            |
|----------|---------|---------|----------|-----|------|--------------------------------------------|
| 207.157  | 206.152 | 0.0021  | 207.1591 | 350 | 78.9 | Tri(propylene glycol) methyl ether         |
| 496.417  | 495.369 | -0.0408 | 496.3762 | 145 | 100  | 2-O-Methyl PAF C-16                        |
| 414.2891 | 449.314 | 0.0112  | 414.3003 | 269 | 95   | Glycodeoxycholic acid                      |
| 472.291  | 471.314 | 0.03    | 472.321  | 55  | 100  | Terfenadine                                |
| 170.1122 | 187.121 | 0.0054  | 170.1176 | 415 | 71   | 7-Keto-8-aminopelargonic acid              |
| 655.4943 | 654.492 | 0.0048  | 655.4991 | 249 | 20.2 | Deca(propylene glycol) monobutyl ether     |
| 170.1251 | 187.121 | -0.0075 | 170.1176 | 419 | 70.6 | 7-Keto-8-aminopelargonic acid              |
| 472.3318 | 471.314 | -0.011  | 472.321  | 102 | 100  | Terfenadine                                |
| 655.4667 | 654.492 | 0.0324  | 655.4991 | 141 | 52   | Deca(propylene glycol) monobutyl ether     |
| 472.3318 | 471.314 | -0.011  | 472.321  | 63  | 100  | Terfenadine                                |
| 516.3205 | 515.292 | -0.0216 | 516.2989 | 79  | 100  | Taurocholic acid                           |
| 516.3205 | 515.292 | -0.0216 | 516.2989 | 140 | 100  | Taurocholic acid                           |
| 170.1122 | 169.085 | -0.0198 | 170.0924 | 346 | 45.1 | L-Histidine, 1-methyl-                     |
| 472.3318 | 471.314 | -0.011  | 472.321  | 192 | 100  | Terfenadine                                |
| 516.3205 | 515.292 | -0.0216 | 516.2989 | 130 | 100  | Taurocholic acid                           |
| 170.1122 | 169.085 | -0.0198 | 170.0924 | 354 | 58.9 | L-Histidine, 3-methyl-                     |
| 170.1251 | 169.085 | -0.0327 | 170.0924 | 342 | 68.3 | L-Histidine, 3-methyl-                     |
| 206.1384 | 223.106 | -0.0361 | 206.1023 | 157 | 76.7 | N-Acetyl-D-galactosaminitol                |
| 114.091  | 113.059 | -0.0248 | 114.0662 | 308 | 28.3 | Creatinine                                 |
| 414.2891 | 413     | 0.05    | 414.34   | 191 | 100  | Solasodine                                 |
| 474.2907 | 473.275 | -0.0084 | 474.2823 | 84  | 62.3 | Trp-Ile-Arg                                |
| 328.1988 | 327.147 | -0.0445 | 328.1543 | 81  | 39.3 | Naloxone                                   |
| 516.3205 | 515.292 | -0.0216 | 516.2989 | 274 | 100  | Taurocholic acid                           |
| 370.2484 | 369.288 | 0.0468  | 370.2952 | 192 | 16.9 | N-Oleoyl-L-serine                          |
| 472.3318 | 471.314 | -0.011  | 472.321  | 109 | 100  | Terfenadine                                |
| 461.2688 | 460.28  | 0.0183  | 461.2871 | 61  | 100  | Trp-Lys-Lys                                |
| 206.1384 | 223.106 | -0.0361 | 206.1023 | 227 | 96.4 | N-Acetyl-D-galactosaminitol                |
| 474.2907 | 473.275 | -0.0084 | 474.2823 | 133 | 34   | Leu-Trp-Arg                                |
| 422.2707 | 421.233 | -0.0309 | 422.2398 | 101 | 39.7 | Gln-Phe-Lys                                |
| 370.2484 | 369.288 | 0.0468  | 370.2952 | 147 | 15.1 | N-Oleoyl-L-serine                          |
| 414.259  | 449.314 | 0.0413  | 414.3003 | 258 | 96.6 | Glycodeoxycholic acid                      |
| 518.3165 | 495.332 | 0.0052  | 518.3217 | 49  | 100  | 1-Hexadecanoyl-sn-glycero-3-phosphocholine |
| 461.2688 | 460.243 | -0.0181 | 461.2507 | 127 | 22.6 | Trp-Gln-Lys                                |
| 422.2573 | 421.233 | -0.0175 | 422.2398 | 129 | 25.6 | Phe-Gln-Lys                                |
| 458.3056 | 435.281 | -0.0357 | 458.2699 | 64  | 100  | N-Acetyl-S-geranylgeranyl-L-cysteine       |
| 239.141  | 239     | 0.04    | 239.18   | 7   | 37.6 | MG 9:0; [M+Li]+;<br>MG(9:0/0:0/0:0)        |

|          |         |         |          |     |      |                                                    |
|----------|---------|---------|----------|-----|------|----------------------------------------------------|
| 169.0621 | 169     | 0.05    | 169.11   | 55  | 71   | MG 4:0; [M+Li]+;<br>MG(4:0/0:0/0:0)                |
| 458.3056 | 435.281 | -0.0357 | 458.2699 | 100 | 100  | N-Acetyl-S-geranylgeranyl-L-cysteine               |
| 422.2345 | 421.269 | 0.0417  | 422.2762 | 32  | 100  | Phe-Lys-Lys                                        |
| 461.2688 | 460.243 | -0.0181 | 461.2507 | 151 | 20.4 | Trp-Gln-Lys                                        |
| 472.291  | 471.314 | 0.03    | 472.321  | 82  | 100  | Terfenadine                                        |
| 370.2484 | 369.288 | 0.0468  | 370.2952 | 114 | 20.4 | N-Oleoyl-L-serine                                  |
| 195.1223 | 194.115 | 0.0004  | 195.1227 | 305 | 100  | Tetraethylene glycol                               |
| 516.3205 | 515.292 | -0.0216 | 516.2989 | 97  | 100  | Taurocholic acid                                   |
| 170.1251 | 169.085 | -0.0327 | 170.0924 | 386 | 51.7 | L-Histidine, 1-methyl-                             |
| 244.1904 | 226.193 | 0.0367  | 244.2271 | 494 | 98.2 | 2,4,7,9-Tetramethyl-5-decyne-4,7-diol              |
| 226.1797 | 225.136 | -0.0359 | 226.1438 | 157 | 73.3 | 3,4,5-TrimethoxyAmphetamine                        |
| 474.2907 | 473.275 | -0.0084 | 474.2823 | 44  | 33.5 | Ile-Trp-Arg                                        |
| 472.291  | 471.314 | 0.03    | 472.321  | 77  | 100  | Terfenadine                                        |
| 370.2484 | 369.288 | 0.0468  | 370.2952 | 107 | 16.6 | N-Oleoyl-L-serine                                  |
| 414.259  | 413.202 | -0.0494 | 414.2096 | 38  | 100  | PyroGlu-Gln-Arg                                    |
| 422.2417 | 421.233 | -0.0019 | 422.2398 | 98  | 26.6 | Gln-Phe-Lys                                        |
| 474.2907 | 473.275 | -0.0084 | 474.2823 | 58  | 48.6 | Ile-Trp-Arg                                        |
| 518.3165 | 495.332 | 0.0052  | 518.3217 | 69  | 100  | 1-Hexadecanoyl-sn-glycero-3-phosphocholine         |
| 195.1223 | 194.115 | 0.0004  | 195.1227 | 356 | 99   | Tetraethylene glycol                               |
| 244.1904 | 226.193 | 0.0367  | 244.2271 | 393 | 97.4 | 2,4,7,9-Tetramethyl-5-decyne-4,7-diol              |
| 474.2907 | 473.275 | -0.0084 | 474.2823 | 84  | 35.2 | Ile-Trp-Arg                                        |
| 518.3165 | 495.332 | 0.0052  | 518.3217 | 74  | 55.4 | 1-Hexadecanoyl-sn-glycero-3-phosphocholine         |
| 370.2484 | 370     | -0.04   | 370.21   | 111 | 40.2 | MGDG 7:0; [M+NH4-CO]+;<br>MGDG(3:0/4:0)            |
| 239.1487 | 238.099 | -0.043  | 239.106  | 26  | 100  | 4-(2-Hydroxyethyl)piperazine-1-ethanesulfonic acid |
| 137.0453 | 136.039 | 0.0005  | 137.0458 | 386 | 91.9 | Hypoxanthine                                       |
| 474.2907 | 473.275 | -0.0084 | 474.2823 | 100 | 68.7 | Ile-Trp-Arg                                        |
| 370.2484 | 370     | -0.04   | 370.21   | 133 | 14.6 | MGDG 7:0; [M+NH4-CO]+;<br>MGDG(2:0/5:0)            |
| 655.4667 | 654.492 | 0.0324  | 655.4991 | 130 | 43.4 | Deca(propylene glycol)monobutyl ether              |
| 474.2907 | 473.275 | -0.0084 | 474.2823 | 59  | 100  | Leu-Trp-Arg                                        |
| 472.291  | 471.314 | 0.03    | 472.321  | 105 | 100  | Terfenadine                                        |
| 414.2746 | 449.314 | 0.0257  | 414.3003 | 70  | 100  | Glycodeoxycholic acid                              |
| 787.6688 | 786.661 | 0       | 787.6688 | 54  | 100  | N-Docosanoyl-4-sphingenyl-1-O-phosphorylcholine    |
| 139.0503 | 138.043 | -0.0001 | 139.0502 | 596 | 80.3 | 4-Imidazoleacrylic acid                            |
| 414.259  | 449.314 | 0.0413  | 414.3003 | 121 | 100  | Glycodeoxycholic acid                              |

|          |         |         |          |     |      |                                                                   |
|----------|---------|---------|----------|-----|------|-------------------------------------------------------------------|
| 170.1444 | 169.085 | -0.052  | 170.0924 | 358 | 47.4 | L-Histidine, 3-methyl-                                            |
| 638.6067 | 638     | -0.04   | 638.57   | 122 | 36.6 | DG 36:2; [M+NH <sub>4</sub> ] <sup>+</sup> ;<br>DG(14:1/22:1/0:0) |
| 402.2682 | 401.278 | 0.017   | 402.285  | 24  | 100  | Myriocin                                                          |
| 474.2907 | 473.275 | -0.0084 | 474.2823 | 60  | 37.8 | Leu-Trp-Arg                                                       |
| 170.14   | 187.121 | -0.0224 | 170.1176 | 205 | 60   | 7-Keto-8-aminopelargonic<br>acid                                  |
| 170.1251 | 169.085 | -0.0327 | 170.0924 | 260 | 59.6 | L-Histidine, 1-methyl-                                            |
| 458.3056 | 435.281 | -0.0357 | 458.2699 | 44  | 100  | N-Acetyl-S-geranylgeranyl-L-<br>cysteine                          |
| 474.2907 | 473.275 | -0.0084 | 474.2823 | 52  | 43.1 | Trp-Ile-Arg                                                       |
| 170.1251 | 169.085 | -0.0327 | 170.0924 | 237 | 75.8 | L-Histidine, 3-methyl-                                            |
| 474.2907 | 473.275 | -0.0084 | 474.2823 | 67  | 56.2 | Leu-Trp-Arg                                                       |
| 474.2907 | 473.275 | -0.0084 | 474.2823 | 48  | 56.7 | Leu-Trp-Arg                                                       |
| 458.3056 | 435.281 | -0.0357 | 458.2699 | 11  | 100  | N-Acetyl-S-geranylgeranyl-L-<br>cysteine                          |
| 400.355  | 400.343 | -0.0129 | 400.3421 | 36  | 18.8 | Palmitoyl-L-carnitine cation                                      |
| 437.2353 | 436.207 | -0.021  | 437.2143 | 94  | 100  | Phe-Asp-Arg                                                       |
| 170.1251 | 187.121 | -0.0075 | 170.1176 | 11  | 50   | 7-Keto-8-aminopelargonic<br>acid                                  |
| 655.4667 | 654.492 | 0.0324  | 655.4991 | 247 | 27.6 | Deca(propylene glycol)<br>monobutyl ether                         |
| 170.1251 | 187.121 | -0.0075 | 170.1176 | 105 | 27.5 | 7-Keto-8-aminopelargonic<br>acid                                  |
| 400.3206 | 400.343 | 0.0215  | 400.3421 | 15  | 100  | Palmitoyl-L-carnitine cation                                      |
| 170.1251 | 169.085 | -0.0327 | 170.0924 | 262 | 41.6 | L-Histidine, 1-methyl-                                            |
| 343.2943 | 408.288 | -0.03   | 343.2643 | 17  | 100  | Cholic acid                                                       |
| 170.135  | 187.121 | -0.0174 | 170.1176 | 190 | 36.4 | 7-Keto-8-aminopelargonic<br>acid                                  |
| 461.2453 | 460.243 | 0.0054  | 461.2507 | 62  | 37.5 | Trp-Gln-Lys                                                       |
| 170.1251 | 169.085 | -0.0327 | 170.0924 | 218 | 38.8 | L-Histidine, 3-methyl-                                            |
| 787.6248 | 786.661 | 0.044   | 787.6688 | 211 | 18.6 | N-Docosanoyl-4-sphingeny-1-<br>O-phosphorylcholine                |
| 461.2688 | 230.152 | 0.0421  | 461.3109 | 30  | 100  | Dodecanedioic acid                                                |
| 170.135  | 187.121 | -0.0174 | 170.1176 | 236 | 37   | 7-Keto-8-aminopelargonic<br>acid                                  |
| 655.4667 | 654.492 | 0.0324  | 655.4991 | 129 | 41.9 | Deca(propylene glycol)<br>monobutyl ether                         |
| 461.2904 | 230.163 | 0.043   | 461.3334 | 189 | 93.4 | Leu-Val                                                           |
| 655.4667 | 654.492 | 0.0324  | 655.4991 | 124 | 37.2 | Deca(propylene glycol)<br>monobutyl ether                         |
| 400.3206 | 400.343 | 0.0215  | 400.3421 | 149 | 8.9  | Palmitoyl-L-carnitine cation                                      |
| 170.14   | 187.121 | -0.0224 | 170.1176 | 341 | 56.5 | 7-Keto-8-aminopelargonic<br>acid                                  |
| 400.3206 | 400.343 | 0.0215  | 400.3421 | 343 | 16.5 | Palmitoyl-L-carnitine cation                                      |
| 655.4667 | 654.492 | 0.0324  | 655.4991 | 113 | 38.1 | Deca(propylene glycol)<br>monobutyl ether                         |

|          |         |         |          |     |      |                                                                       |
|----------|---------|---------|----------|-----|------|-----------------------------------------------------------------------|
| 695.4097 | 672.473 | 0.0525  | 695.4622 | 14  | 100  | 1-Hexadecanoyl-2-(9Z,12Z-octadecadienyl)-sn-glycero-3-phosphoric acid |
| 170.1444 | 187.121 | -0.0268 | 170.1176 | 120 | 46.6 | 7-Keto-8-aminopelargonic acid                                         |
| 695.4097 | 672.473 | 0.0525  | 695.4622 | 31  | 100  | 1-Hexadecanoyl-2-(9Z,12Z-octadecadienyl)-sn-glycero-3-phosphoric acid |
| 400.3206 | 400.343 | 0.0215  | 400.3421 | 197 | 10   | Palmitoyl-L-carnitine cation                                          |
| 343.2827 | 342.256 | -0.0195 | 343.2632 | 93  | 100  | Retinyl propionate                                                    |
| 400.3206 | 400.343 | 0.0215  | 400.3421 | 302 | 12.5 | Palmitoyl-L-carnitine cation                                          |
| 170.1251 | 187.121 | -0.0075 | 170.1176 | 68  | 25.6 | 7-Keto-8-aminopelargonic acid                                         |
| 472.291  | 471.314 | 0.03    | 472.321  | 47  | 100  | Terfenadine                                                           |
| 458.3056 | 435.281 | -0.0357 | 458.2699 | 65  | 100  | N-Acetyl-S-geranylgeranyl-L-cysteine                                  |
| 414.2891 | 413     | 0.05    | 414.34   | 28  | 100  | Solasodine                                                            |
| 474.2907 | 473.275 | -0.0084 | 474.2823 | 24  | 100  | Ile-Trp-Arg                                                           |
| 170.1251 | 187.121 | -0.0075 | 170.1176 | 81  | 23.3 | 7-Keto-8-aminopelargonic acid                                         |
| 414.259  | 413.239 | -0.0131 | 414.2459 | 40  | 29.8 | PyroGlu-Lys-Arg                                                       |
| 458.3056 | 435.281 | -0.0357 | 458.2699 | 30  | 100  | N-Acetyl-S-geranylgeranyl-L-cysteine                                  |
| 458.3056 | 435.281 | -0.0357 | 458.2699 | 51  | 100  | N-Acetyl-S-geranylgeranyl-L-cysteine                                  |
| 414.2746 | 449.314 | 0.0257  | 414.3003 | 50  | 100  | Glycodeoxycholic acid                                                 |
| 474.2907 | 473.275 | -0.0084 | 474.2823 | 58  | 50.9 | Leu-Trp-Arg                                                           |
| 518.3165 | 495.332 | 0.0052  | 518.3217 | 92  | 100  | 1-Hexadecanoyl-sn-glycero-3-phosphocholine                            |
| 474.2907 | 473.275 | -0.0084 | 474.2823 | 46  | 100  | Leu-Trp-Arg                                                           |
| 458.3056 | 435.281 | -0.0357 | 458.2699 | 64  | 100  | N-Acetyl-S-geranylgeranyl-L-cysteine                                  |
| 474.2907 | 473.275 | -0.0084 | 474.2823 | 87  | 27.5 | Ile-Trp-Arg                                                           |
| 170.1251 | 169     | -0.04   | 170.09   | 278 | 32.5 | 3-Methyl-L-histidine                                                  |
| 474.2907 | 473.275 | -0.0084 | 474.2823 | 27  | 30.1 | Leu-Trp-Arg                                                           |
| 655.4667 | 654.492 | 0.0324  | 655.4991 | 145 | 45.5 | Deca(propylene glycol) monobutyl ether                                |
| 170.1251 | 187.121 | -0.0075 | 170.1176 | 31  | 23.4 | 7-Keto-8-aminopelargonic acid                                         |
| 474.2907 | 473.275 | -0.0084 | 474.2823 | 53  | 64.7 | Leu-Trp-Arg                                                           |
| 170.1251 | 187.121 | -0.0075 | 170.1176 | 50  | 25.9 | 7-Keto-8-aminopelargonic acid                                         |
| 474.2907 | 473.275 | -0.0084 | 474.2823 | 23  | 100  | Leu-Trp-Arg                                                           |
| 170.1251 | 187.121 | -0.0075 | 170.1176 | 71  | 36.4 | 7-Keto-8-aminopelargonic acid                                         |
| 474.2907 | 473.275 | -0.0084 | 474.2823 | 59  | 19.8 | Ile-Trp-Arg                                                           |



|          |         |         |          |     |      |                                            |
|----------|---------|---------|----------|-----|------|--------------------------------------------|
| 170.1251 | 187.121 | -0.0075 | 170.1176 | 133 | 46.7 | 7-Keto-8-aminopelargonic acid              |
| 170.1251 | 187.121 | -0.0075 | 170.1176 | 75  | 24.5 | 7-Keto-8-aminopelargonic acid              |
| 422.2573 | 421.269 | 0.0189  | 422.2762 | 25  | 100  | Phe-Lys-Lys                                |
| 170.1251 | 187.121 | -0.0075 | 170.1176 | 113 | 32.2 | 7-Keto-8-aminopelargonic acid              |
| 472.261  | 471.223 | -0.0307 | 472.2303 | 66  | 100  | PyroGlu-Trp-Arg                            |
| 458.3056 | 435.281 | -0.0357 | 458.2699 | 80  | 100  | N-Acetyl-S-geranylgeranyl-L-cysteine       |
| 170.1251 | 187.121 | -0.0075 | 170.1176 | 90  | 39   | 7-Keto-8-aminopelargonic acid              |
| 474.2907 | 473.275 | -0.0084 | 474.2823 | 61  | 100  | Ile-Trp-Arg                                |
| 458.2695 | 435.281 | 0.0004  | 458.2699 | 35  | 100  | N-Acetyl-S-geranylgeranyl-L-cysteine       |
| 518.277  | 495.332 | 0.0447  | 518.3217 | 60  | 100  | 1-Hexadecanoyl-sn-glycero-3-phosphocholine |
| 458.3056 | 435.281 | -0.0357 | 458.2699 | 33  | 100  | N-Acetyl-S-geranylgeranyl-L-cysteine       |
| 474.2449 | 473.275 | 0.0374  | 474.2823 | 68  | 38.8 | Trp-Ile-Arg                                |
| 515.3745 | 246.211 | 0.0373  | 515.4117 | 29  | 100  | Dodecyldimethylphosphine oxide             |
| 170.1251 | 187.121 | -0.0075 | 170.1176 | 124 | 37.5 | 7-Keto-8-aminopelargonic acid              |
| 170.1251 | 187.121 | -0.0075 | 170.1176 | 129 | 38.4 | 7-Keto-8-aminopelargonic acid              |
| 515.3601 | 246.211 | 0.0516  | 515.4117 | 44  | 100  | Dodecyldimethylphosphine oxide             |
| 474.2449 | 473.275 | 0.0374  | 474.2823 | 101 | 67.3 | Trp-Ile-Arg                                |
| 458.2695 | 435.281 | 0.0004  | 458.2699 | 67  | 100  | N-Acetyl-S-geranylgeranyl-L-cysteine       |
| 170.1251 | 187.121 | -0.0075 | 170.1176 | 169 | 39.6 | 7-Keto-8-aminopelargonic acid              |
| 474.2907 | 473.275 | -0.0084 | 474.2823 | 90  | 48.2 | Ile-Trp-Arg                                |
| 170.1251 | 187.121 | -0.0075 | 170.1176 | 187 | 49.9 | 7-Keto-8-aminopelargonic acid              |
| 458.2578 | 435.281 | 0.0121  | 458.2699 | 132 | 100  | N-Acetyl-S-geranylgeranyl-L-cysteine       |
| 474.2907 | 473.275 | -0.0084 | 474.2823 | 77  | 56   | Trp-Ile-Arg                                |
| 518.3165 | 495.332 | 0.0052  | 518.3217 | 72  | 100  | 1-Hexadecanoyl-sn-glycero-3-phosphocholine |
| 170.1251 | 187.121 | -0.0075 | 170.1176 | 196 | 53   | 7-Keto-8-aminopelargonic acid              |
| 170.1251 | 187.121 | -0.0075 | 170.1176 | 146 | 33.3 | 7-Keto-8-aminopelargonic acid              |
| 474.2907 | 473.275 | -0.0084 | 474.2823 | 48  | 100  | Ile-Trp-Arg                                |
| 400.3206 | 400.343 | 0.0215  | 400.3421 | 36  | 56   | Palmitoyl-L-carnitine cation               |

|          |         |         |          |     |      |                                                                |
|----------|---------|---------|----------|-----|------|----------------------------------------------------------------|
| 458.3056 | 435.281 | -0.0357 | 458.2699 | 66  | 100  | N-Acetyl-S-geranylgeranyl-L-cysteine                           |
| 170.1251 | 187.121 | -0.0075 | 170.1176 | 194 | 46.8 | 7-Keto-8-aminopelargonic acid                                  |
| 170.1251 | 187.121 | -0.0075 | 170.1176 | 143 | 40.3 | 7-Keto-8-aminopelargonic acid                                  |
| 458.2403 | 435.281 | 0.0296  | 458.2699 | 85  | 79.3 | N-Acetyl-S-geranylgeranyl-L-cysteine                           |
| 400.3206 | 401.278 | -0.0501 | 400.2705 | 60  | 73.2 | Myriocin                                                       |
| 170.1251 | 187.121 | -0.0075 | 170.1176 | 204 | 65.7 | 7-Keto-8-aminopelargonic acid                                  |
| 458.3056 | 435.281 | -0.0357 | 458.2699 | 58  | 100  | N-Acetyl-S-geranylgeranyl-L-cysteine                           |
| 655.4667 | 654.492 | 0.0324  | 655.4991 | 107 | 45.9 | Deca(propylene glycol) monobutyl ether                         |
| 170.1251 | 187.121 | -0.0075 | 170.1176 | 122 | 38.5 | 7-Keto-8-aminopelargonic acid                                  |
| 414.259  | 413.202 | -0.0494 | 414.2096 | 115 | 49.9 | PyroGlu-Gln-Arg                                                |
| 370.2484 | 370     | -0.04   | 370.21   | 205 | 41.3 | MGDG 7:0; [M+NH <sub>4</sub> -CO] <sup>+</sup> ; MGDG(2:0/5:0) |
| 343.2757 | 342.256 | -0.0125 | 343.2632 | 109 | 56.3 | Retinyl propionate                                             |
| 170.1251 | 187.121 | -0.0075 | 170.1176 | 201 | 48.4 | 7-Keto-8-aminopelargonic acid                                  |
| 518.3165 | 495.332 | 0.0052  | 518.3217 | 83  | 100  | 1-Hexadecanoyl-sn-glycero-3-phosphocholine                     |
| 458.3056 | 435.281 | -0.0357 | 458.2699 | 46  | 100  | N-Acetyl-S-geranylgeranyl-L-cysteine                           |
| 170.1251 | 187.121 | -0.0075 | 170.1176 | 142 | 59.5 | 7-Keto-8-aminopelargonic acid                                  |
| 474.2907 | 473.275 | -0.0084 | 474.2823 | 59  | 36.5 | Leu-Trp-Arg                                                    |
| 458.3056 | 435.281 | -0.0357 | 458.2699 | 48  | 100  | N-Acetyl-S-geranylgeranyl-L-cysteine                           |
| 170.1251 | 187.121 | -0.0075 | 170.1176 | 156 | 48.5 | 7-Keto-8-aminopelargonic acid                                  |
| 474.2907 | 473.275 | -0.0084 | 474.2823 | 50  | 40.2 | Ile-Trp-Arg                                                    |
| 458.3056 | 435.281 | -0.0357 | 458.2699 | 39  | 100  | N-Acetyl-S-geranylgeranyl-L-cysteine                           |
| 170.1251 | 187.121 | -0.0075 | 170.1176 | 221 | 52   | 7-Keto-8-aminopelargonic acid                                  |
| 414.259  | 413.202 | -0.0494 | 414.2096 | 75  | 100  | PyroGlu-Gln-Arg                                                |
| 458.3056 | 435.281 | -0.0357 | 458.2699 | 56  | 100  | N-Acetyl-S-geranylgeranyl-L-cysteine                           |
| 474.2907 | 473.275 | -0.0084 | 474.2823 | 39  | 100  | Ile-Trp-Arg                                                    |
| 170.1251 | 187.121 | -0.0075 | 170.1176 | 215 | 62.3 | 7-Keto-8-aminopelargonic acid                                  |
| 400.3206 | 401.278 | -0.0501 | 400.2705 | 48  | 44.7 | Myriocin                                                       |

|          |         |         |          |     |      |                                            |
|----------|---------|---------|----------|-----|------|--------------------------------------------|
| 170.1251 | 187.121 | -0.0075 | 170.1176 | 192 | 59.3 | 7-Keto-8-aminopelargonic acid              |
| 518.3165 | 495.332 | 0.0052  | 518.3217 | 133 | 100  | 1-Hexadecanoyl-sn-glycero-3-phosphocholine |
| 170.1251 | 187.121 | -0.0075 | 170.1176 | 227 | 50.4 | 7-Keto-8-aminopelargonic acid              |
| 458.3056 | 435.281 | -0.0357 | 458.2699 | 65  | 100  | N-Acetyl-S-geranylgeranyl-L-cysteine       |
| 400.3206 | 400.343 | 0.0215  | 400.3421 | 38  | 100  | Palmitoyl-L-carnitine cation               |
| 170.1251 | 187.121 | -0.0075 | 170.1176 | 248 | 45.4 | 7-Keto-8-aminopelargonic acid              |
| 518.3165 | 495.332 | 0.0052  | 518.3217 | 64  | 100  | 1-Hexadecanoyl-sn-glycero-3-phosphocholine |
| 170.135  | 187.121 | -0.0174 | 170.1176 | 175 | 41.8 | 7-Keto-8-aminopelargonic acid              |
| 400.3206 | 400.343 | 0.0215  | 400.3421 | 82  | 37   | Palmitoyl-L-carnitine cation               |
| 414.2746 | 413.239 | -0.0287 | 414.2459 | 75  | 35.7 | PyroGlu-Lys-Arg                            |
| 414.2746 | 413.239 | -0.0287 | 414.2459 | 49  | 39   | PyroGlu-Lys-Arg                            |
| 170.1251 | 187.121 | -0.0075 | 170.1176 | 235 | 62.2 | 7-Keto-8-aminopelargonic acid              |
| 343.2873 | 408.288 | -0.0231 | 343.2643 | 45  | 100  | Cholic acid                                |
| 414.2746 | 413.239 | -0.0287 | 414.2459 | 101 | 68.7 | PyroGlu-Lys-Arg                            |
| 170.135  | 187.121 | -0.0174 | 170.1176 | 219 | 47.1 | 7-Keto-8-aminopelargonic acid              |
| 458.3056 | 435.281 | -0.0357 | 458.2699 | 58  | 100  | N-Acetyl-S-geranylgeranyl-L-cysteine       |
| 518.3165 | 495.332 | 0.0052  | 518.3217 | 63  | 100  | 1-Hexadecanoyl-sn-glycero-3-phosphocholine |
| 400.3206 | 400.343 | 0.0215  | 400.3421 | 87  | 25.1 | Palmitoyl-L-carnitine cation               |
| 474.2907 | 473.275 | -0.0084 | 474.2823 | 32  | 100  | Ile-Trp-Arg                                |
| 170.1251 | 169.085 | -0.0327 | 170.0924 | 166 | 36.4 | L-Histidine, 1-methyl-                     |
| 343.2757 | 342.256 | -0.0125 | 343.2632 | 95  | 100  | Retinyl propionate                         |
| 458.3056 | 435.281 | -0.0357 | 458.2699 | 76  | 100  | N-Acetyl-S-geranylgeranyl-L-cysteine       |
| 414.2746 | 413.239 | -0.0287 | 414.2459 | 95  | 100  | PyroGlu-Lys-Arg                            |
| 170.1251 | 187.121 | -0.0075 | 170.1176 | 262 | 50.8 | 7-Keto-8-aminopelargonic acid              |
| 458.3056 | 435.281 | -0.0357 | 458.2699 | 65  | 100  | N-Acetyl-S-geranylgeranyl-L-cysteine       |
| 170.1251 | 187.121 | -0.0075 | 170.1176 | 229 | 44.8 | 7-Keto-8-aminopelargonic acid              |
| 170.1251 | 169.085 | -0.0327 | 170.0924 | 235 | 37   | L-Histidine, 1-methyl-                     |
| 458.3056 | 435.281 | -0.0357 | 458.2699 | 58  | 100  | N-Acetyl-S-geranylgeranyl-L-cysteine       |
| 474.2642 | 473.275 | 0.0181  | 474.2823 | 53  | 41.8 | Leu-Trp-Arg                                |
| 170.1251 | 169.085 | -0.0327 | 170.0924 | 206 | 37.1 | L-Histidine, 1-methyl-                     |

|          |         |         |          |     |      |                                            |
|----------|---------|---------|----------|-----|------|--------------------------------------------|
| 458.3056 | 435.281 | -0.0357 | 458.2699 | 39  | 100  | N-Acetyl-S-geranylgeranyl-L-cysteine       |
| 170.1251 | 187.121 | -0.0075 | 170.1176 | 225 | 40.9 | 7-Keto-8-aminopelargonic acid              |
| 474.2907 | 473.275 | -0.0084 | 474.2823 | 41  | 73.2 | Ile-Trp-Arg                                |
| 343.2757 | 342.256 | -0.0125 | 343.2632 | 117 | 86.1 | Retinyl propionate                         |
| 370.2484 | 370     | -0.04   | 370.21   | 167 | 31.2 | MGDG 7:0; [M+NH4-CO]+; MGDG(2:0/5:0)       |
| 170.1251 | 169.085 | -0.0327 | 170.0924 | 253 | 46.6 | L-Histidine, 1-methyl-                     |
| 370.2217 | 370     | -0.01   | 370.21   | 148 | 50   | MGDG 7:0; [M+NH4-CO]+; MGDG(2:0/5:0)       |
| 170.1251 | 169.085 | -0.0327 | 170.0924 | 382 | 79.6 | L-Histidine, 1-methyl-                     |
| 343.2757 | 408.288 | -0.0114 | 343.2643 | 55  | 100  | Cholic acid                                |
| 370.2484 | 369.288 | 0.0468  | 370.2952 | 208 | 12.1 | N-Oleoyl-L-serine                          |
| 170.1251 | 169.085 | -0.0327 | 170.0924 | 336 | 71.4 | L-Histidine, 1-methyl-                     |
| 370.2484 | 370     | -0.04   | 370.21   | 181 | 34   | MGDG 7:0; [M+NH4-CO]+; MGDG(2:0/5:0)       |
| 518.3165 | 495.332 | 0.0052  | 518.3217 | 79  | 100  | 1-Hexadecanoyl-sn-glycero-3-phosphocholine |
| 474.2907 | 473.275 | -0.0084 | 474.2823 | 57  | 100  | Leu-Trp-Arg                                |
| 170.1251 | 169.085 | -0.0327 | 170.0924 | 266 | 44.5 | L-Histidine, 1-methyl-                     |
| 170.1251 | 169.085 | -0.0327 | 170.0924 | 269 | 60.2 | L-Histidine, 1-methyl-                     |
| 474.2907 | 473.275 | -0.0084 | 474.2823 | 25  | 42.4 | Ile-Trp-Arg                                |
| 170.1251 | 187.121 | -0.0075 | 170.1176 | 299 | 40.6 | 7-Keto-8-aminopelargonic acid              |
| 474.2907 | 473.275 | -0.0084 | 474.2823 | 29  | 100  | Ile-Trp-Arg                                |
| 170.1251 | 169.085 | -0.0327 | 170.0924 | 222 | 51.4 | L-Histidine, 1-methyl-                     |
| 170.1251 | 187.121 | -0.0075 | 170.1176 | 322 | 47   | 7-Keto-8-aminopelargonic acid              |
| 370.2484 | 370     | -0.04   | 370.21   | 141 | 13.7 | MGDG 7:0; [M+NH4-CO]+; MGDG(2:0/5:0)       |
| 170.1251 | 169.085 | -0.0327 | 170.0924 | 361 | 78.9 | L-Histidine, 1-methyl-                     |
| 474.2907 | 473.275 | -0.0084 | 474.2823 | 35  | 48   | Leu-Trp-Arg                                |
| 170.1251 | 169.085 | -0.0327 | 170.0924 | 309 | 65.2 | L-Histidine, 1-methyl-                     |
| 170.1251 | 187.121 | -0.0075 | 170.1176 | 237 | 30.7 | 7-Keto-8-aminopelargonic acid              |
| 370.1994 | 370     | 0.01    | 370.21   | 195 | 49.5 | MGDG 7:0; [M+NH4-CO]+; MGDG(2:0/5:0)       |
| 170.1251 | 169.085 | -0.0327 | 170.0924 | 313 | 76.5 | L-Histidine, 1-methyl-                     |
| 370.1994 | 370     | 0.01    | 370.21   | 138 | 48.5 | MGDG 7:0; [M+NH4-CO]+; MGDG(2:0/5:0)       |
| 170.1251 | 169.085 | -0.0327 | 170.0924 | 217 | 61.2 | L-Histidine, 1-methyl-                     |
| 474.2907 | 473.275 | -0.0084 | 474.2823 | 17  | 100  | Ile-Trp-Arg                                |
| 170.1251 | 187.121 | -0.0075 | 170.1176 | 208 | 36.6 | 7-Keto-8-aminopelargonic acid              |
| 458.3056 | 435.281 | -0.0357 | 458.2699 | 35  | 100  | N-Acetyl-S-geranylgeranyl-L-cysteine       |

|          |         |         |          |     |      |                                                     |
|----------|---------|---------|----------|-----|------|-----------------------------------------------------|
| 370.2084 | 370     | 0       | 370.21   | 131 | 48   | MGDG 7:0; [M+NH4-CO]+;<br>MGDG(2:0/5:0)             |
| 170.1251 | 187.121 | -0.0075 | 170.1176 | 205 | 36.7 | 7-Keto-8-aminopelargonic<br>acid                    |
| 474.2907 | 473.275 | -0.0084 | 474.2823 | 45  | 100  | Leu-Trp-Arg                                         |
| 370.2484 | 370     | -0.04   | 370.21   | 127 | 29.6 | MGDG 7:0; [M+NH4-CO]+;<br>MGDG(2:0/5:0)             |
| 170.1251 | 187.121 | -0.0075 | 170.1176 | 251 | 40.8 | 7-Keto-8-aminopelargonic<br>acid                    |
| 370.2484 | 370     | -0.04   | 370.21   | 127 | 33.2 | MGDG 7:0; [M+NH4-CO]+;<br>MGDG(2:0/5:0)             |
| 370.2484 | 370     | -0.04   | 370.21   | 145 | 16.9 | MGDG 7:0; [M+NH4-CO]+;<br>MGDG(2:0/5:0)             |
| 170.1251 | 187.121 | -0.0075 | 170.1176 | 223 | 38.3 | 7-Keto-8-aminopelargonic<br>acid                    |
| 170.1251 | 169.085 | -0.0327 | 170.0924 | 299 | 60.9 | L-Histidine, 1-methyl-                              |
| 458.2578 | 435.281 | 0.0121  | 458.2699 | 47  | 43.4 | N-Acetyl-S-geranylgeranyl-L-<br>cysteine            |
| 170.1251 | 187.121 | -0.0075 | 170.1176 | 264 | 55.1 | 7-Keto-8-aminopelargonic<br>acid                    |
| 474.2907 | 473.275 | -0.0084 | 474.2823 | 23  | 100  | Ile-Trp-Arg                                         |
| 170.1251 | 187.121 | -0.0075 | 170.1176 | 222 | 55.9 | 7-Keto-8-aminopelargonic<br>acid                    |
| 170.1251 | 187.121 | -0.0075 | 170.1176 | 211 | 46.9 | 7-Keto-8-aminopelargonic<br>acid                    |
| 170.1251 | 187.121 | -0.0075 | 170.1176 | 197 | 57.1 | 7-Keto-8-aminopelargonic<br>acid                    |
| 170.1251 | 187.121 | -0.0075 | 170.1176 | 265 | 58.1 | 7-Keto-8-aminopelargonic<br>acid                    |
| 474.2907 | 473.275 | -0.0084 | 474.2823 | 25  | 40.2 | Ile-Trp-Arg                                         |
| 370.2484 | 370     | -0.04   | 370.21   | 148 | 37.6 | MGDG 7:0; [M+NH4-CO]+;<br>MGDG(2:0/5:0)             |
| 414.2746 | 449.314 | 0.0257  | 414.3003 | 67  | 100  | Glycodeoxycholic acid                               |
| 472.291  | 471.314 | 0.03    | 472.321  | 51  | 100  | Terfenadine                                         |
| 170.1251 | 187.121 | -0.0075 | 170.1176 | 385 | 73.1 | 7-Keto-8-aminopelargonic<br>acid                    |
| 170.1251 | 187.121 | -0.0075 | 170.1176 | 424 | 69.7 | 7-Keto-8-aminopelargonic<br>acid                    |
| 170.1251 | 187.121 | -0.0075 | 170.1176 | 398 | 73.5 | 7-Keto-8-aminopelargonic<br>acid                    |
| 414.2746 | 413.239 | -0.0287 | 414.2459 | 115 | 43.7 | PyroGlu-Arg-Lys                                     |
| 170.1444 | 187.121 | -0.0268 | 170.1176 | 390 | 78.1 | 7-Keto-8-aminopelargonic<br>acid                    |
| 787.6248 | 786.661 | 0.044   | 787.6688 | 111 | 100  | N-Docosanoyl-4-sphingenyl-1-<br>O-phosphorylcholine |
| 195.1223 | 388.243 | 0.007   | 195.129  | 52  | 100  | Leu-Thr-Arg                                         |
| 474.2907 | 473.275 | -0.0084 | 474.2823 | 55  | 100  | Leu-Trp-Arg                                         |

|          |         |         |          |     |      |                                            |
|----------|---------|---------|----------|-----|------|--------------------------------------------|
| 170.14   | 187.121 | -0.0224 | 170.1176 | 279 | 70.4 | 7-Keto-8-aminopelargonic acid              |
| 472.291  | 471.314 | 0.03    | 472.321  | 102 | 100  | Terfenadine                                |
| 518.3165 | 495.332 | 0.0052  | 518.3217 | 50  | 100  | 1-Hexadecanoyl-sn-glycero-3-phosphocholine |
| 655.5166 | 654.492 | -0.0175 | 655.4991 | 241 | 100  | Deca(propylene glycol) monobutyl ether     |
| 170.1251 | 169.085 | -0.0327 | 170.0924 | 362 | 66.9 | L-Histidine, 1-methyl-                     |
| 461.3108 | 460.28  | -0.0237 | 461.2871 | 31  | 57.3 | Trp-Lys-Lys                                |

**Table A11.** List of non-volatile metabolites (LC/MS) for managed population animals. Samples collected in Dec 2011 from multiple animals were pooled. Experiment was conducted using specialized lipids fraction protocol on RP column (refer to Materials and Methods section) in positive ion mode. Top three matches are given for each compound.

| Parent m/z | Mass    | Delta (m/z) | Library Precurs or m/z | Match Score | Probability (%) | Chem ID                          |
|------------|---------|-------------|------------------------|-------------|-----------------|----------------------------------|
| 170.1251   | 187.121 | -0.0075     | 170.1176               | 397         | 76.5            | 7-Keto-8-aminopelargonic acid    |
| 170.1251   | 187.121 | -0.0075     | 170.1176               | 358         | 18.1            | 7-Keto-8-aminopelargonic acid    |
| 170.1251   | 187.121 | -0.0075     | 170.1176               | 309         | 3.7             | 7-Keto-8-aminopelargonic acid    |
| 474.2907   | 473.275 | -0.0084     | 474.2823               | 51          | 100             | Leu-Trp-Arg                      |
| 400.3206   | 400.343 | 0.0215      | 400.3421               | 163         | 21.4            | Palmitoyl-L-carnitine cation     |
| 400.3206   | 400.343 | 0.0215      | 400.3421               | 158         | 17.2            | Palmitoyl-L-carnitine cation     |
| 400.3206   | 400.343 | 0.0215      | 400.3421               | 156         | 15.9            | Palmitoyl-L-carnitine cation     |
| 170.1251   | 187.121 | -0.0075     | 170.1176               | 386         | 61.8            | 7-Keto-8-aminopelargonic acid    |
| 170.1251   | 169.085 | -0.0327     | 170.0924               | 362         | 20.7            | L-Histidine, 1-methyl-           |
| 170.1251   | 169.085 | -0.0327     | 170.0924               | 360         | 20.7            | L-Histidine, 1-methyl-           |
| 461.3108   | 460.28  | -0.0237     | 461.2871               | 52          | 100             | Trp-Lys-Lys                      |
| 472.291    | 471.314 | 0.03        | 472.321                | 74          | 100             | Terfenadine                      |
| 170.1251   | 187.121 | -0.0075     | 170.1176               | 378         | 72.5            | 7-Keto-8-aminopelargonic acid    |
| 170.1251   | 187.121 | -0.0075     | 170.1176               | 350         | 20.9            | 7-Keto-8-aminopelargonic acid    |
| 170.1251   | 169.085 | -0.0327     | 170.0924               | 295         | 4.1             | L-Histidine, 1-methyl-           |
| 400.3206   | 400.343 | 0.0215      | 400.3421               | 110         | 10.2            | Palmitoyl-L-carnitine cation     |
| 400.3206   | 400.343 | 0.0215      | 400.3421               | 110         | 10.2            | Palmitoyl-L-carnitine cation     |
| 400.3206   | 400.343 | 0.0215      | 400.3421               | 109         | 9.8             | Palmitoyl-L-carnitine cation     |
| 472.291    | 471.314 | 0.03        | 472.321                | 108         | 100             | Terfenadine                      |
| 400.3206   | 400.343 | 0.0215      | 400.3421               | 76          | 57.9            | Palmitoyl-L-carnitine cation     |
| 400.3206   | 400.343 | 0.0215      | 400.3421               | 67          | 42.1            | Palmitoyl-L-carnitine cation     |
| 170.1251   | 187.121 | -0.0075     | 170.1176               | 394         | 78.3            | 7-Keto-8-aminopelargonic acid    |
| 170.1251   | 187.121 | -0.0075     | 170.1176               | 351         | 17.3            | 7-Keto-8-aminopelargonic acid    |
| 170.1251   | 169.085 | -0.0327     | 170.0924               | 303         | 3.6             | L-Histidine, 1-methyl-           |
| 370.2484   | 369.288 | 0.0468      | 370.2952               | 279         | 20.2            | N-Oleoyl-L-serine                |
| 370.2484   | 369.288 | 0.0468      | 370.2952               | 277         | 18.6            | N-Oleoyl-L-serine                |
| 370.2484   | 369.288 | 0.0468      | 370.2952               | 267         | 13.1            | N-Oleoyl-L-serine                |
| 414.2746   | 413.239 | -0.0287     | 414.2459               | 84          | 100             | PyroGlu-Arg-Lys                  |
| 472.291    | 471.314 | 0.03        | 472.321                | 102         | 100             | Terfenadine                      |
| 170.1251   | 187.121 | -0.0075     | 170.1176               | 367         | 45              | 7-Keto-8-aminopelargonic acid    |
| 170.1251   | 169.085 | -0.0327     | 170.0924               | 347         | 20.5            | L-Histidine, 3-methyl-           |
| 170.1251   | 169.085 | -0.0327     | 170.0924               | 343         | 17.3            | L-Histidine, 1-methyl-           |
| 655.4667   | 654.492 | 0.0324      | 655.4991               | 112         | 38.6            | Deca(propylene glycol) monobutyl |
| 655.4667   | 654.492 | 0.0324      | 655.4991               | 108         | 32.6            | Deca(propylene glycol) monobutyl |
| 655.4667   | 654.492 | 0.0324      | 655.4991               | 105         | 28.8            | Deca(propylene glycol) monobutyl |

|          |         |         |          |     |      |                                              |
|----------|---------|---------|----------|-----|------|----------------------------------------------|
| 516.3205 | 515.292 | -0.0216 | 516.2989 | 69  | 100  | Taurocholic acid                             |
| 170.1251 | 169.085 | -0.0327 | 170.0924 | 452 | 49.4 | L-Histidine, 1-methyl-                       |
| 170.1251 | 169.085 | -0.0327 | 170.0924 | 452 | 49.4 | L-Histidine, 1-methyl-                       |
| 170.1251 | 169.085 | -0.0327 | 170.0924 | 451 | 49.4 | L-Histidine, 1-methyl-                       |
| 474.2907 | 473.275 | -0.0084 | 474.2823 | 36  | 55.4 | Ile-Trp-Arg                                  |
| 474.2907 | 473.275 | -0.0084 | 474.2823 | 31  | 44.6 | Leu-Trp-Arg                                  |
| 170.1251 | 187.121 | -0.0075 | 170.1176 | 420 | 75.7 | 7-Keto-8-aminopelargonic acid                |
| 170.1251 | 187.121 | -0.0075 | 170.1176 | 360 | 13.4 | 7-Keto-8-aminopelargonic acid                |
| 170.1251 | 169.085 | -0.0327 | 170.0924 | 344 | 7.7  | L-Histidine, 1-methyl-                       |
| 400.3206 | 400.343 | 0.0215  | 400.3421 | 112 | 42.6 | Palmitoyl-L-carnitine cation                 |
| 400.3206 | 400.343 | 0.0215  | 400.3421 | 101 | 29.2 | Palmitoyl-L-carnitine cation                 |
| 400.3206 | 400.343 | 0.0215  | 400.3421 | 100 | 28.1 | Palmitoyl-L-carnitine cation                 |
| 516.3205 | 515.292 | -0.0216 | 516.2989 | 74  | 100  | Taurocholic acid                             |
| 170.1251 | 187.121 | -0.0075 | 170.1176 | 351 | 57.5 | 7-Keto-8-aminopelargonic acid                |
| 170.1251 | 169.085 | -0.0327 | 170.0924 | 329 | 22.7 | L-Histidine, 1-methyl-                       |
| 170.1251 | 169.085 | -0.0327 | 170.0924 | 328 | 22.7 | L-Histidine, 1-methyl-                       |
| 472.291  | 471.314 | 0.03    | 472.321  | 162 | 100  | Terfenadine                                  |
| 472.291  | 471.314 | 0.03    | 472.321  | 149 | 100  | Terfenadine                                  |
| 461.2688 | 461     | -0.04   | 461.23   | 6   | 27.1 | PA 17:0; [M+Na] <sup>+</sup> ; GPA(4:0/13:0) |
| 461.2688 | 461     | -0.04   | 461.23   | 6   | 27.1 | PA 17:0; [M+Na] <sup>+</sup> ; GPA(13:0/4:0) |
| 461.2688 | 461     | -0.04   | 461.23   | 2   | 22.9 | PA 17:0; [M+Na] <sup>+</sup> ; GPA(2:0/15:0) |
| 516.3205 | 515.292 | -0.0216 | 516.2989 | 59  | 100  | Taurocholic acid                             |
| 472.291  | 471.314 | 0.03    | 472.321  | 111 | 100  | Terfenadine                                  |
| 414.2891 | 449.314 | 0.0112  | 414.3003 | 98  | 100  | Glycodeoxycholic acid                        |
| 414.2891 | 449.314 | 0.0112  | 414.3003 | 88  | 100  | Glycodeoxycholic acid                        |
| 472.291  | 471.314 | 0.03    | 472.321  | 150 | 100  | Terfenadine                                  |
| 472.291  | 471.314 | 0.03    | 472.321  | 131 | 100  | Terfenadine                                  |
| 516.3205 | 515.292 | -0.0216 | 516.2989 | 269 | 100  | Taurocholic acid                             |
| 516.3205 | 515.292 | -0.0216 | 516.2989 | 252 | 100  | Taurocholic acid                             |
| 516.3205 | 515.292 | -0.0216 | 516.2989 | 250 | 100  | Taurocholic acid                             |
| 472.3318 | 471.314 | -0.011  | 472.321  | 181 | 100  | Terfenadine                                  |
| 472.3318 | 471.314 | -0.011  | 472.321  | 153 | 100  | Terfenadine                                  |
| 170.14   | 169.085 | -0.0476 | 170.0924 | 221 | 53.7 | L-Histidine, 3-methyl-                       |
| 170.14   | 169.085 | -0.0476 | 170.0924 | 220 | 53.7 | L-Histidine, 3-methyl-                       |
| 170.14   | 169.085 | -0.0476 | 170.0924 | 211 | 53.7 | L-Histidine, 3-methyl-                       |
| 391.2847 | 390.277 | -0.0005 | 391.2843 | 89  | 51.2 | Bis(2-ethylhexyl) phthalate                  |
| 391.2847 | 390.277 | -0.0005 | 391.2843 | 85  | 43.2 | Diethyl phthalate                            |
| 391.2847 | 390.277 | -0.0005 | 391.2843 | 77  | 43.2 | Diethyl phthalate                            |
| 419.3154 | 418.308 | 0.0002  | 419.3156 | 196 | 100  | 1,2-Benzenedicarboxylic acid, dinonyl ester  |
| 149.0233 | 166.027 | 0       | 149.0233 | 451 | 99   | 1,2-Benzenedicarboxylic acid                 |
| 149.0233 | 166.027 | 0       | 149.0233 | 447 | 99   | 1,2-Benzenedicarboxylic acid                 |
| 149.0233 | 166.027 | 0       | 149.0233 | 441 | 99   | 1,2-Benzenedicarboxylic acid                 |
| 311.1646 | 310.193 | 0.036   | 311.2006 | 99  | 67.9 | Mestranol                                    |
| 311.1646 | 310.193 | 0.036   | 311.2006 | 95  | 67.9 | Mestranol                                    |
| 311.1646 | 310.193 | 0.036   | 311.2006 | 92  | 67.9 | Mestranol                                    |
| 279.159  | 278.152 | 0.0001  | 279.1591 | 235 | 96.3 | Dibutyl phthalate                            |



|          |         |         |          |     |      |                                            |
|----------|---------|---------|----------|-----|------|--------------------------------------------|
| 279.159  | 278.152 | 0.0001  | 279.1591 | 235 | 96.3 | Dibutyl phthalate                          |
| 279.159  | 278.152 | 0.0001  | 279.1591 | 233 | 96.3 | Dibutyl phthalate                          |
| 516.3205 | 515.292 | -0.0216 | 516.2989 | 261 | 100  | Taurocholic acid                           |
| 516.3205 | 515.292 | -0.0216 | 516.2989 | 255 | 100  | Taurocholic acid                           |
| 516.3205 | 515.292 | -0.0216 | 516.2989 | 222 | 100  | Taurocholic acid                           |
| 170.135  | 187.121 | -0.0174 | 170.1176 | 346 | 66.5 | 7-Keto-8-aminopelargonic acid              |
| 170.135  | 187.121 | -0.0174 | 170.1176 | 296 | 13.5 | 7-Keto-8-aminopelargonic acid              |
| 170.135  | 169.085 | -0.0426 | 170.0924 | 284 | 9    | L-Histidine, 1-methyl-                     |
| 399.2511 | 398.243 | -0.0005 | 399.2506 | 236 | 100  | Tris(butoxyethyl) phosphate                |
| 399.2511 | 398.243 | -0.0004 | 399.2506 | 90  | 100  | Tris(butoxyethyl) phosphate                |
| 399.2511 | 398.243 | -0.0004 | 399.2506 | 89  | 100  | Tris(butoxyethyl) phosphate                |
| 163.0749 | 179.095 | 0.0005  | 163.0754 | 250 | 75.1 | 3,4-Methylenedioxyamphetamine              |
| 163.0749 | 179.095 | 0.0005  | 163.0754 | 247 | 75.1 | 3,4-Methylenedioxyamphetamine              |
| 163.0749 | 179.095 | 0.0005  | 163.0754 | 244 | 75.1 | 3,4-Methylenedioxyamphetamine              |
| 516.3205 | 515.292 | -0.0216 | 516.2989 | 261 | 100  | Taurocholic acid                           |
| 516.3205 | 515.292 | -0.0216 | 516.2989 | 261 | 100  | Taurocholic acid                           |
| 516.3205 | 515.292 | -0.0216 | 516.2989 | 248 | 100  | Taurocholic acid                           |
| 472.291  | 471.314 | 0.03    | 472.321  | 281 | 100  | Terfenadine                                |
| 472.291  | 471.314 | 0.03    | 472.321  | 242 | 100  | Terfenadine                                |
| 472.291  | 471.314 | 0.03    | 472.321  | 173 | 100  | Terfenadine                                |
| 387.1826 | 386     | -0.05   | 387.13   | 229 | 23.8 | 1-O-b-D-glucopyranosyl sinapate            |
| 387.1826 | 386     | -0.05   | 387.13   | 224 | 19.2 | 1-O-b-D-glucopyranosyl sinapate            |
| 387.1826 | 386     | -0.05   | 387.13   | 220 | 16.2 | 1-O-b-D-glucopyranosyl sinapate            |
| 267.172  | 266.165 | 0       | 267.172  | 221 | 99   | Tributyl phosphate                         |
| 267.172  | 266.165 | 0       | 267.172  | 221 | 99   | Tributyl phosphate                         |
| 267.172  | 266.165 | 0       | 267.172  | 220 | 99   | Tributyl phosphate                         |
| 458.3056 | 435.281 | -0.0357 | 458.2699 | 90  | 100  | N-Acetyl-S-geranylgeranyl-L-cysteine       |
| 391.2847 | 390.277 | -0.0005 | 391.2843 | 142 | 49.7 | Diocetyl phthalate                         |
| 391.2847 | 390.277 | -0.0005 | 391.2843 | 141 | 47.8 | Bis(2-ethylhexyl) phthalate                |
| 391.2847 | 390.277 | -0.0005 | 391.2843 | 128 | 49.7 | Diocetyl phthalate                         |
| 404.2083 | 403.207 | 0.006   | 404.214  | 55  | 8.7  | Glu-Gln-Lys                                |
| 404.2083 | 403.207 | 0.006   | 404.214  | 49  | 6.8  | Glu-Gln-Lys                                |
| 404.2083 | 403.207 | 0.006   | 404.214  | 49  | 6.8  | Gln-Glu-Lys                                |
| 474.2907 | 473.275 | -0.0084 | 474.2823 | 107 | 68.4 | Leu-Trp-Arg                                |
| 474.2907 | 473.275 | -0.0084 | 474.2823 | 64  | 15.1 | Leu-Trp-Arg                                |
| 474.2907 | 473.275 | -0.0084 | 474.2823 | 61  | 13.3 | Leu-Trp-Arg                                |
| 170.1251 | 169.085 | -0.0327 | 170.0924 | 332 | 34.4 | L-Histidine, 1-methyl-                     |
| 170.1251 | 169.085 | -0.0327 | 170.0924 | 330 | 34.4 | L-Histidine, 1-methyl-                     |
| 170.1251 | 169.085 | -0.0327 | 170.0924 | 327 | 34.4 | L-Histidine, 1-methyl-                     |
| 518.3165 | 495.332 | 0.0052  | 518.3217 | 89  | 100  | 1-Hexadecanoyl-sn-glycero-3-phosphocholine |
| 516.3205 | 515.292 | -0.0216 | 516.2989 | 172 | 100  | Taurocholic acid                           |
| 516.3205 | 515.292 | -0.0216 | 516.2989 | 166 | 100  | Taurocholic acid                           |
| 516.3205 | 515.292 | -0.0216 | 516.2989 | 166 | 100  | Taurocholic acid                           |
| 170.1251 | 187.121 | -0.0075 | 170.1176 | 373 | 68.1 | 7-Keto-8-aminopelargonic acid              |
| 170.1251 | 187.121 | -0.0075 | 170.1176 | 329 | 14.8 | 7-Keto-8-aminopelargonic acid              |
| 170.1251 | 169.085 | -0.0327 | 170.0924 | 313 | 8.5  | L-Histidine, 1-methyl-                     |

|          |         |         |          |     |      |                                          |
|----------|---------|---------|----------|-----|------|------------------------------------------|
| 472.291  | 471.314 | 0.03    | 472.321  | 197 | 100  | Terfenadine                              |
| 472.291  | 471.314 | 0.03    | 472.321  | 164 | 100  | Terfenadine                              |
| 279.0943 | 278.086 | -0.0009 | 279.0933 | 30  | 100  | Triphenylphosphine oxide                 |
| 279.0943 | 278.086 | -0.0009 | 279.0933 | 22  | 100  | Triphenylphosphine oxide                 |
| 279.0943 | 278.086 | -0.0009 | 279.0933 | 20  | 100  | Triphenylphosphine oxide                 |
| 387.1826 | 386     | -0.05   | 387.13   | 241 | 22.8 | 1-O-b-D-glucofuranosyl sinapate          |
| 387.1826 | 386     | -0.05   | 387.13   | 241 | 22.8 | 1-O-b-D-glucofuranosyl sinapate          |
| 387.1826 | 386     | -0.05   | 387.13   | 233 | 17   | 1-O-b-D-glucofuranosyl sinapate          |
| 288.2521 | 287.196 | -0.049  | 288.203  | 122 | 26.1 | Leu-Arg                                  |
| 288.2521 | 287.196 | -0.049  | 288.203  | 119 | 23.1 | Arg-Leu                                  |
| 288.2521 | 287.196 | -0.049  | 288.203  | 106 | 14.9 | Arg-Ile                                  |
| 516.3205 | 515.292 | -0.0216 | 516.2989 | 199 | 100  | Taurocholic acid                         |
| 516.3205 | 515.292 | -0.0216 | 516.2989 | 193 | 100  | Taurocholic acid                         |
| 516.3205 | 515.292 | -0.0216 | 516.2989 | 192 | 100  | Taurocholic acid                         |
| 474.2907 | 473.275 | -0.0084 | 474.2823 | 180 | 62.2 | Leu-Trp-Arg                              |
| 474.2907 | 473.275 | -0.0084 | 474.2823 | 136 | 13.5 | Leu-Trp-Arg                              |
| 474.2907 | 473.275 | -0.0084 | 474.2823 | 117 | 6.5  | Ile-Trp-Arg                              |
| 655.4667 | 654.492 | 0.0324  | 655.4991 | 198 | 19.8 | Deca(propylene glycol) monobutyl ether   |
| 655.4667 | 654.492 | 0.0324  | 655.4991 | 194 | 16.7 | Deca(propylene glycol) monobutyl ether   |
| 655.4667 | 654.492 | 0.0324  | 655.4991 | 188 | 13.1 | Deca(propylene glycol) monobutyl ether   |
| 170.1251 | 187.121 | -0.0075 | 170.1176 | 383 | 71.5 | 7-Keto-8-aminopelargonic acid            |
| 170.1251 | 187.121 | -0.0075 | 170.1176 | 329 | 14   | 7-Keto-8-aminopelargonic acid            |
| 170.1251 | 169.085 | -0.0327 | 170.0924 | 319 | 9.9  | L-Histidine, 1-methyl-                   |
| 370.2484 | 369.288 | 0.0468  | 370.2952 | 295 | 18.9 | N-Oleoyl-L-serine                        |
| 370.2484 | 369.288 | 0.0468  | 370.2952 | 288 | 14.4 | N-Oleoyl-L-serine                        |
| 370.2484 | 369.288 | 0.0468  | 370.2952 | 285 | 12.8 | N-Oleoyl-L-serine                        |
| 249.1125 | 249.139 | 0.0261  | 249.1386 | 217 | 69.6 | 1H-Pyrazolium, 1,2-dimethyl-3,5-diphenyl |
| 249.1125 | 249.139 | 0.0261  | 249.1386 | 211 | 69.6 | 1H-Pyrazolium, 1,2-dimethyl-3,5-diphenyl |
| 249.1125 | 249.139 | 0.0261  | 249.1386 | 210 | 69.6 | 1H-Pyrazolium, 1,2-dimethyl-3,5-diphenyl |
| 207.157  | 206.152 | 0.0021  | 207.1591 | 350 | 78.9 | Tri(propylene glycol) methyl ether       |
| 207.157  | 206.152 | 0.0021  | 207.1591 | 343 | 78.9 | Tri(propylene glycol) methyl ether       |
| 207.157  | 206.152 | 0.0021  | 207.1591 | 342 | 78.9 | Tri(propylene glycol) methyl ether       |
| 496.417  | 495.369 | -0.0408 | 496.3762 | 145 | 100  | 2-O-Methyl PAF C-16                      |
| 496.417  | 495.369 | -0.0408 | 496.3762 | 142 | 100  | 2-O-Methyl PAF C-16                      |
| 496.417  | 495.369 | -0.0408 | 496.3762 | 139 | 100  | 2-O-Methyl PAF C-16                      |
| 414.2891 | 449.314 | 0.0112  | 414.3003 | 269 | 95   | Glycodeoxycholic acid                    |
| 414.2891 | 449.314 | 0.0112  | 414.3003 | 262 | 95   | Glycodeoxycholic acid                    |
| 414.2891 | 413     | 0.05    | 414.34   | 141 | 4.1  | Solasodine                               |
| 472.291  | 471.314 | 0.03    | 472.321  | 55  | 100  | Terfenadine                              |
| 170.1122 | 187.121 | 0.0054  | 170.1176 | 415 | 71   | 7-Keto-8-aminopelargonic acid            |
| 170.1122 | 187.121 | 0.0054  | 170.1176 | 365 | 14.4 | 7-Keto-8-aminopelargonic acid            |

|          |         |         |          |     |      |                                        |
|----------|---------|---------|----------|-----|------|----------------------------------------|
| 170.1122 | 169.085 | -0.0198 | 170.0924 | 359 | 11.4 | L-Histidine, 1-methyl-                 |
| 655.4943 | 654.492 | 0.0048  | 655.4991 | 249 | 20.2 | Deca(propylene glycol) monobutyl ether |
| 655.4943 | 654.492 | 0.0048  | 655.4991 | 248 | 19.4 | Deca(propylene glycol) monobutyl ether |
| 655.4943 | 654.492 | 0.0048  | 655.4991 | 239 | 14.1 | Deca(propylene glycol) monobutyl ether |
| 170.1251 | 187.121 | -0.0075 | 170.1176 | 419 | 70.6 | 7-Keto-8-aminopelargonic acid          |
| 170.1251 | 187.121 | -0.0075 | 170.1176 | 370 | 14.5 | 7-Keto-8-aminopelargonic acid          |
| 170.1251 | 169.085 | -0.0327 | 170.0924 | 362 | 10.8 | L-Histidine, 1-methyl-                 |
| 472.3318 | 471.314 | -0.011  | 472.321  | 102 | 100  | Terfenadine                            |
| 472.3318 | 471.314 | -0.011  | 472.321  | 85  | 100  | Terfenadine                            |
| 655.4667 | 654.492 | 0.0324  | 655.4991 | 141 | 52   | Deca(propylene glycol) monobutyl ether |
| 655.4667 | 654.492 | 0.0324  | 655.4991 | 139 | 48   | Deca(propylene glycol) monobutyl ether |
| 472.3318 | 471.314 | -0.011  | 472.321  | 63  | 100  | Terfenadine                            |
| 472.3318 | 471.314 | -0.011  | 472.321  | 58  | 100  | Terfenadine                            |
| 516.3205 | 515.292 | -0.0216 | 516.2989 | 79  | 100  | Taurocholic acid                       |
| 516.3205 | 515.292 | -0.0216 | 516.2989 | 77  | 100  | Taurocholic acid                       |
| 516.3205 | 515.292 | -0.0216 | 516.2989 | 77  | 100  | Taurocholic acid                       |
| 516.3205 | 515.292 | -0.0216 | 516.2989 | 140 | 100  | Taurocholic acid                       |
| 516.3205 | 515.292 | -0.0216 | 516.2989 | 140 | 100  | Taurocholic acid                       |
| 516.3205 | 515.292 | -0.0216 | 516.2989 | 136 | 100  | Taurocholic acid                       |
| 170.1122 | 169.085 | -0.0198 | 170.0924 | 346 | 45.1 | L-Histidine, 1-methyl-                 |
| 170.1122 | 169.085 | -0.0198 | 170.0924 | 346 | 45.1 | L-Histidine, 1-methyl-                 |
| 170.1122 | 169.085 | -0.0198 | 170.0924 | 344 | 41.6 | L-Histidine, 3-methyl-                 |
| 472.3318 | 471.314 | -0.011  | 472.321  | 192 | 100  | Terfenadine                            |
| 472.3318 | 471.314 | -0.011  | 472.321  | 171 | 100  | Terfenadine                            |
| 472.3318 | 471.314 | -0.011  | 472.321  | 131 | 100  | Terfenadine                            |
| 516.3205 | 515.292 | -0.0216 | 516.2989 | 130 | 100  | Taurocholic acid                       |
| 516.3205 | 515.292 | -0.0216 | 516.2989 | 123 | 100  | Taurocholic acid                       |
| 516.3205 | 515.292 | -0.0216 | 516.2989 | 123 | 100  | Taurocholic acid                       |
| 170.1122 | 169.085 | -0.0198 | 170.0924 | 354 | 58.9 | L-Histidine, 3-methyl-                 |
| 170.1122 | 169.085 | -0.0198 | 170.0924 | 351 | 58.9 | L-Histidine, 3-methyl-                 |
| 170.1122 | 169.085 | -0.0198 | 170.0924 | 350 | 58.9 | L-Histidine, 3-methyl-                 |
| 170.1251 | 169.085 | -0.0327 | 170.0924 | 342 | 68.3 | L-Histidine, 3-methyl-                 |
| 170.1251 | 169.085 | -0.0327 | 170.0924 | 334 | 68.3 | L-Histidine, 3-methyl-                 |
| 170.1251 | 169.085 | -0.0327 | 170.0924 | 323 | 68.3 | L-Histidine, 3-methyl-                 |
| 206.1384 | 223.106 | -0.0361 | 206.1023 | 157 | 76.7 | N-Acetyl-D-galactosaminitol            |
| 206.1384 | 410.217 | -0.0229 | 206.1155 | 114 | 16.9 | Tyr-Thr-Lys                            |
| 206.1384 | 223.106 | -0.0361 | 206.1023 | 111 | 76.7 | N-Acetyl-D-galactosaminitol            |
| 114.091  | 113.059 | -0.0248 | 114.0662 | 308 | 28.3 | Creatinine                             |
| 114.091  | 113.059 | -0.0248 | 114.0662 | 308 | 28.3 | Creatinine                             |
| 114.091  | 113.059 | -0.0248 | 114.0662 | 306 | 28.3 | Creatinine                             |
| 414.2891 | 413     | 0.05    | 414.34   | 191 | 100  | Solasodine                             |
| 474.2907 | 473.275 | -0.0084 | 474.2823 | 84  | 62.3 | Trp-Ile-Arg                            |

|          |         |         |          |     |      |                                                    |
|----------|---------|---------|----------|-----|------|----------------------------------------------------|
| 474.2907 | 473.275 | -0.0084 | 474.2823 | 69  | 37.7 | Trp-Ile-Arg                                        |
| 328.1988 | 327.147 | -0.0445 | 328.1543 | 81  | 39.3 | Naloxone                                           |
| 328.1988 | 327.147 | -0.0445 | 328.1543 | 80  | 37.8 | 6-Monoacetylmorphine                               |
| 328.1988 | 327.147 | -0.0445 | 328.1543 | 69  | 37.8 | 6-Monoacetylmorphine                               |
| 516.3205 | 515.292 | -0.0216 | 516.2989 | 274 | 100  | Taurocholic acid                                   |
| 516.3205 | 515.292 | -0.0216 | 516.2989 | 267 | 100  | Taurocholic acid                                   |
| 516.3205 | 515.292 | -0.0216 | 516.2989 | 266 | 100  | Taurocholic acid                                   |
| 370.2484 | 369.288 | 0.0468  | 370.2952 | 192 | 16.9 | N-Oleoyl-L-serine                                  |
| 370.2484 | 369.288 | 0.0468  | 370.2952 | 189 | 14.9 | N-Oleoyl-L-serine                                  |
| 370.2484 | 369.288 | 0.0468  | 370.2952 | 179 | 10.5 | N-Oleoyl-L-serine                                  |
| 472.3318 | 471.314 | -0.011  | 472.321  | 109 | 100  | Terfenadine                                        |
| 472.3318 | 471.314 | -0.011  | 472.321  | 88  | 100  | Terfenadine                                        |
| 461.2688 | 460.28  | 0.0183  | 461.2871 | 61  | 100  | Trp-Lys-Lys                                        |
| 206.1384 | 223.106 | -0.0361 | 206.1023 | 227 | 96.4 | N-Acetyl-D-galactosaminitol                        |
| 206.1384 | 223.106 | -0.0361 | 206.1023 | 157 | 96.4 | N-Acetyl-D-galactosaminitol                        |
| 206.1384 | 223.106 | -0.0361 | 206.1023 | 152 | 96.4 | N-Acetyl-D-galactosaminitol                        |
| 474.2907 | 473.275 | -0.0084 | 474.2823 | 133 | 34   | Leu-Trp-Arg                                        |
| 474.2907 | 473.275 | -0.0084 | 474.2823 | 117 | 19.6 | Ile-Trp-Arg                                        |
| 474.2907 | 473.275 | -0.0084 | 474.2823 | 116 | 18.8 | Trp-Ile-Arg                                        |
| 422.2707 | 421.233 | -0.0309 | 422.2398 | 101 | 39.7 | Gln-Phe-Lys                                        |
| 422.2707 | 421.233 | -0.0309 | 422.2398 | 96  | 32   | Gln-Phe-Lys                                        |
| 422.2707 | 421.233 | -0.0309 | 422.2398 | 93  | 28.3 | Gln-Phe-Lys                                        |
| 370.2484 | 369.288 | 0.0468  | 370.2952 | 147 | 15.1 | N-Oleoyl-L-serine                                  |
| 370.2484 | 369.288 | 0.0468  | 370.2952 | 139 | 11.3 | N-Oleoyl-L-serine                                  |
| 370.2484 | 369.288 | 0.0468  | 370.2952 | 138 | 10.8 | N-Oleoyl-L-serine                                  |
| 414.259  | 449.314 | 0.0413  | 414.3003 | 258 | 96.6 | Glycodeoxycholic acid                              |
| 414.259  | 449.314 | 0.0413  | 414.3003 | 210 | 96.6 | Glycodeoxycholic acid                              |
| 414.259  | 413.202 | -0.0494 | 414.2096 | 106 | 2.6  | PyroGlu-Gln-Arg                                    |
| 518.3165 | 495.332 | 0.0052  | 518.3217 | 49  | 100  | 1-Hexadecanoyl-sn-glycero-3-phosphocholine         |
| 461.2688 | 460.243 | -0.0181 | 461.2507 | 127 | 22.6 | Trp-Gln-Lys                                        |
| 461.2688 | 460.243 | -0.0181 | 461.2507 | 117 | 15.9 | Trp-Gln-Lys                                        |
| 461.2688 | 460.243 | -0.0181 | 461.2507 | 115 | 14.7 | Trp-Gln-Lys                                        |
| 422.2573 | 421.233 | -0.0175 | 422.2398 | 129 | 25.6 | Phe-Gln-Lys                                        |
| 422.2573 | 421.233 | -0.0175 | 422.2398 | 123 | 20.1 | Phe-Gln-Lys                                        |
| 422.2573 | 421.233 | -0.0175 | 422.2398 | 121 | 18.6 | Phe-Gln-Lys                                        |
| 458.3056 | 435.281 | -0.0357 | 458.2699 | 64  | 100  | N-Acetyl-S-geranylgeranyl-L-cysteine               |
| 458.3056 | 435.281 | -0.0357 | 458.2699 | 56  | 100  | N-Acetyl-S-geranylgeranyl-L-cysteine               |
| 239.141  | 239     | 0.04    | 239.18   | 7   | 37.6 | MG 9:0; [M+Li] <sup>+</sup> ; MG(9:0/0:0/0:0)      |
| 239.141  | 238.099 | -0.035  | 239.106  | 3   | 31.8 | 4-(2-Hydroxyethyl)piperazine-1-ethanesulfonic acid |
| 239.141  | 238.099 | -0.035  | 239.106  | 3   | 31.8 | 4-(2-Hydroxyethyl)piperazine-1-ethanesulfonic acid |
| 169.0621 | 169     | 0.05    | 169.11   | 55  | 71   | MG 4:0; [M+Li] <sup>+</sup> ; MG(4:0/0:0/0:0)      |
| 169.0621 | 210.1   | -0.0013 | 169.0608 | 14  | 16.2 | Aprobarbital                                       |
| 169.0621 | 146.069 | -0.0037 | 169.0584 | 8   | 12.7 | Ala-Gly                                            |
| 458.3056 | 435.281 | -0.0357 | 458.2699 | 100 | 100  | N-Acetyl-S-geranylgeranyl-L-cysteine               |

|          |         |         |          |     |      |                                            |
|----------|---------|---------|----------|-----|------|--------------------------------------------|
| 458.3056 | 435.281 | -0.0357 | 458.2699 | 93  | 100  | N-Acetyl-S-geranylgeranyl-L-cysteine       |
| 458.3056 | 435.281 | -0.0357 | 458.2699 | 65  | 100  | N-Acetyl-S-geranylgeranyl-L-cysteine       |
| 422.2345 | 421.269 | 0.0417  | 422.2762 | 32  | 100  | Phe-Lys-Lys                                |
| 461.2688 | 460.243 | -0.0181 | 461.2507 | 151 | 20.4 | Trp-Gln-Lys                                |
| 461.2688 | 460.28  | 0.0183  | 461.2871 | 136 | 12.4 | Lys-Trp-Lys                                |
| 461.2688 | 460.243 | -0.0181 | 461.2507 | 135 | 11.9 | Trp-Gln-Lys                                |
| 472.291  | 471.314 | 0.03    | 472.321  | 82  | 100  | Terfenadine                                |
| 370.2484 | 369.288 | 0.0468  | 370.2952 | 114 | 20.4 | N-Oleoyl-L-serine                          |
| 370.2484 | 369.288 | 0.0468  | 370.2952 | 113 | 19.6 | N-Oleoyl-L-serine                          |
| 370.2484 | 369.288 | 0.0468  | 370.2952 | 113 | 19.6 | N-Oleoyl-L-serine                          |
| 195.1223 | 194.115 | 0.0004  | 195.1227 | 305 | 100  | Tetraethylene glycol                       |
| 195.1223 | 194.115 | 0.0004  | 195.1227 | 303 | 100  | Tetraethylene glycol                       |
| 195.1223 | 194.115 | 0.0004  | 195.1227 | 298 | 100  | Tetraethylene glycol                       |
| 516.3205 | 515.292 | -0.0216 | 516.2989 | 97  | 100  | Taurocholic acid                           |
| 516.3205 | 515.292 | -0.0216 | 516.2989 | 92  | 100  | Taurocholic acid                           |
| 516.3205 | 515.292 | -0.0216 | 516.2989 | 86  | 100  | Taurocholic acid                           |
| 170.1251 | 169.085 | -0.0327 | 170.0924 | 386 | 51.7 | L-Histidine, 1-methyl-                     |
| 170.1251 | 169.085 | -0.0327 | 170.0924 | 385 | 51.7 | L-Histidine, 1-methyl-                     |
| 170.1251 | 169.085 | -0.0327 | 170.0924 | 379 | 51.7 | L-Histidine, 1-methyl-                     |
| 244.1904 | 226.193 | 0.0367  | 244.2271 | 494 | 98.2 | 2,4,7,9-Tetramethyl-5-decyne-4,7-diol      |
| 244.1904 | 226.193 | 0.0367  | 244.2271 | 234 | 98.2 | 2,4,7,9-Tetramethyl-5-decyne-4,7-diol      |
| 244.1904 | 243.158 | -0.0248 | 244.1656 | 156 | 1    | Pro-Lys                                    |
| 226.1797 | 225.136 | -0.0359 | 226.1438 | 157 | 73.3 | 3,4,5-TrimethoxyAmphetamine                |
| 226.1797 | 450.259 | -0.0429 | 226.1368 | 117 | 17   | Ile-Tyr-Arg                                |
| 226.1797 | 450.259 | -0.0429 | 226.1368 | 86  | 4.6  | Ile-Tyr-Arg                                |
| 474.2907 | 473.275 | -0.0084 | 474.2823 | 44  | 33.5 | Ile-Trp-Arg                                |
| 474.2907 | 473.275 | -0.0084 | 474.2823 | 36  | 25   | Trp-Ile-Arg                                |
| 474.2907 | 473.275 | -0.0084 | 474.2823 | 29  | 19.2 | Leu-Trp-Arg                                |
| 472.291  | 471.314 | 0.03    | 472.321  | 77  | 100  | Terfenadine                                |
| 370.2484 | 369.288 | 0.0468  | 370.2952 | 107 | 16.6 | N-Oleoyl-L-serine                          |
| 370.2484 | 369.288 | 0.0468  | 370.2952 | 102 | 13.4 | N-Oleoyl-L-serine                          |
| 370.2484 | 369.288 | 0.0468  | 370.2952 | 99  | 11.9 | N-Oleoyl-L-serine                          |
| 414.259  | 413.202 | -0.0494 | 414.2096 | 38  | 100  | PyroGlu-Gln-Arg                            |
| 422.2417 | 421.233 | -0.0019 | 422.2398 | 98  | 26.6 | Gln-Phe-Lys                                |
| 422.2417 | 421.233 | -0.0019 | 422.2398 | 93  | 21.5 | Gln-Phe-Lys                                |
| 422.2417 | 421.233 | -0.0019 | 422.2398 | 90  | 19   | Phe-Gln-Lys                                |
| 474.2907 | 473.275 | -0.0084 | 474.2823 | 58  | 48.6 | Ile-Trp-Arg                                |
| 474.2907 | 473.275 | -0.0084 | 474.2823 | 50  | 36.3 | Leu-Trp-Arg                                |
| 474.2907 | 473.275 | -0.0084 | 474.2823 | 11  | 8.6  | Leu-Trp-Arg                                |
| 518.3165 | 495.332 | 0.0052  | 518.3217 | 69  | 100  | 1-Hexadecanoyl-sn-glycero-3-phosphocholine |
| 195.1223 | 194.115 | 0.0004  | 195.1227 | 356 | 99   | Tetraethylene glycol                       |
| 195.1223 | 194.115 | 0.0004  | 195.1227 | 354 | 99   | Tetraethylene glycol                       |
| 195.1223 | 194.115 | 0.0004  | 195.1227 | 353 | 99   | Tetraethylene glycol                       |
| 244.1904 | 226.193 | 0.0367  | 244.2271 | 393 | 97.4 | 2,4,7,9-Tetramethyl-5-decyne-4,7-diol      |
| 244.1904 | 226.193 | 0.0367  | 244.2271 | 189 | 97.4 | 2,4,7,9-Tetramethyl-5-decyne-4,7-diol      |
| 244.1904 | 243.158 | -0.0248 | 244.1656 | 133 | 1    | Pro-Lys                                    |

|          |         |         |          |     |      |                                                    |
|----------|---------|---------|----------|-----|------|----------------------------------------------------|
| 474.2907 | 473.275 | -0.0084 | 474.2823 | 84  | 35.2 | Ile-Trp-Arg                                        |
| 474.2907 | 473.275 | -0.0084 | 474.2823 | 81  | 31.1 | Leu-Trp-Arg                                        |
| 474.2907 | 473.275 | -0.0084 | 474.2823 | 65  | 17.9 | Trp-Ile-Arg                                        |
| 518.3165 | 495.332 | 0.0052  | 518.3217 | 74  | 55.4 | 1-Hexadecanoyl-sn-glycero-3-phosphocholine         |
| 518.3165 | 495.332 | 0.0052  | 518.3217 | 69  | 44.6 | 1-Hexadecanoyl-sn-glycero-3-phosphocholine         |
| 370.2484 | 370     | -0.04   | 370.21   | 111 | 40.2 | MGDG 7:0; [M+NH4-CO]+; MGDG(3:0/4:0)               |
| 370.2484 | 370     | -0.04   | 370.21   | 111 | 40.2 | MGDG 7:0; [M+NH4-CO]+; MGDG(4:0/3:0)               |
| 370.2484 | 370     | -0.04   | 370.21   | 74  | 9.8  | MGDG 7:0; [M+NH4-CO]+; MGDG(2:0/5:0)               |
| 239.1487 | 238.099 | -0.043  | 239.106  | 26  | 100  | 4-(2-Hydroxyethyl)piperazine-1-ethanesulfonic acid |
| 239.1487 | 238.099 | -0.043  | 239.106  | 21  | 100  | 4-(2-Hydroxyethyl)piperazine-1-ethanesulfonic acid |
| 137.0453 | 136.039 | 0.0005  | 137.0458 | 386 | 91.9 | Hypoxanthine                                       |
| 137.0453 | 136.039 | 0.0005  | 137.0458 | 374 | 91.9 | Hypoxanthine                                       |
| 137.0453 | 136.039 | 0.0005  | 137.0458 | 368 | 91.9 | Hypoxanthine                                       |
| 474.2907 | 473.275 | -0.0084 | 474.2823 | 100 | 68.7 | Ile-Trp-Arg                                        |
| 474.2907 | 473.275 | -0.0084 | 474.2823 | 80  | 31.3 | Leu-Trp-Arg                                        |
| 370.2484 | 370     | -0.04   | 370.21   | 133 | 14.6 | MGDG 7:0; [M+NH4-CO]+; MGDG(2:0/5:0)               |
| 370.2484 | 370     | -0.04   | 370.21   | 133 | 14.6 | MGDG 7:0; [M+NH4-CO]+; MGDG(5:0/2:0)               |
| 370.2484 | 369.288 | 0.0468  | 370.2952 | 131 | 13.5 | N-Oleoyl-L-serine                                  |
| 655.4667 | 654.492 | 0.0324  | 655.4991 | 130 | 43.4 | Deca(propylene glycol) monobutyl ether             |
| 655.4667 | 654.492 | 0.0324  | 655.4991 | 122 | 32.4 | Deca(propylene glycol) monobutyl ether             |
| 655.4667 | 654.492 | 0.0324  | 655.4991 | 114 | 24.2 | Deca(propylene glycol) monobutyl ether             |
| 474.2907 | 473.275 | -0.0084 | 474.2823 | 59  | 100  | Leu-Trp-Arg                                        |
| 472.291  | 471.314 | 0.03    | 472.321  | 105 | 100  | Terfenadine                                        |
| 414.2746 | 449.314 | 0.0257  | 414.3003 | 70  | 100  | Glycodeoxycholic acid                              |
| 414.2746 | 449.314 | 0.0257  | 414.3003 | 56  | 100  | Glycodeoxycholic acid                              |
| 414.2746 | 449.314 | 0.0257  | 414.3003 | 42  | 100  | Glycodeoxycholic acid                              |
| 787.6688 | 786.661 | 0       | 787.6688 | 54  | 100  | N-Docosanoyl-4-sphingenyl-1-O-phosphorylcholine    |
| 139.0503 | 138.043 | -0.0001 | 139.0502 | 596 | 80.3 | 4-Imidazoleacrylic acid                            |
| 139.0503 | 138.043 | -0.0001 | 139.0502 | 589 | 80.3 | 4-Imidazoleacrylic acid                            |
| 139.0503 | 138.043 | -0.0001 | 139.0502 | 586 | 80.3 | 4-Imidazoleacrylic acid                            |
| 414.259  | 449.314 | 0.0413  | 414.3003 | 121 | 100  | Glycodeoxycholic acid                              |
| 414.259  | 449.314 | 0.0413  | 414.3003 | 96  | 100  | Glycodeoxycholic acid                              |
| 414.259  | 449.314 | 0.0413  | 414.3003 | 71  | 100  | Glycodeoxycholic acid                              |
| 170.1444 | 169.085 | -0.052  | 170.0924 | 358 | 47.4 | L-Histidine, 3-methyl-                             |

|          |         |         |          |     |      |                                                   |
|----------|---------|---------|----------|-----|------|---------------------------------------------------|
| 170.1444 | 169.085 | -0.052  | 170.0924 | 357 | 47.4 | L-Histidine, 3-methyl-                            |
| 170.1444 | 169.085 | -0.052  | 170.0924 | 352 | 47.4 | L-Histidine, 3-methyl-                            |
| 638.6067 | 638     | -0.04   | 638.57   | 122 | 36.6 | DG 36:2; [M+NH4] <sup>+</sup> ; DG(14:1/22:1/0:0) |
| 638.6067 | 638     | -0.04   | 638.57   | 122 | 36.6 | DG 36:2; [M+NH4] <sup>+</sup> ; DG(22:1/14:1/0:0) |
| 638.6067 | 638     | -0.04   | 638.57   | 99  | 13.4 | DG 36:2; [M+NH4] <sup>+</sup> ; DG(16:1/20:1/0:0) |
| 402.2682 | 401.278 | 0.017   | 402.285  | 24  | 100  | Myriocin                                          |
| 474.2907 | 473.275 | -0.0084 | 474.2823 | 60  | 37.8 | Leu-Trp-Arg                                       |
| 474.2907 | 473.275 | -0.0084 | 474.2823 | 44  | 21.8 | Ile-Trp-Arg                                       |
| 474.2907 | 473.275 | -0.0084 | 474.2823 | 43  | 20.9 | Trp-Ile-Arg                                       |
| 170.14   | 187.121 | -0.0224 | 170.1176 | 205 | 60   | 7-Keto-8-aminopelargonic acid                     |
| 170.14   | 187.121 | -0.0224 | 170.1176 | 189 | 34.6 | 7-Keto-8-aminopelargonic acid                     |
| 170.14   | 169.089 | -0.0436 | 170.0964 | 122 | 5.3  | Pyridine, 4-benzyl-                               |
| 170.1251 | 169.085 | -0.0327 | 170.0924 | 260 | 59.6 | L-Histidine, 1-methyl-                            |
| 170.1251 | 169.085 | -0.0327 | 170.0924 | 260 | 59.6 | L-Histidine, 1-methyl-                            |
| 170.1251 | 169.085 | -0.0327 | 170.0924 | 249 | 59.6 | L-Histidine, 1-methyl-                            |
| 458.3056 | 435.281 | -0.0357 | 458.2699 | 44  | 100  | N-Acetyl-S-geranylgeranyl-L-cysteine              |
| 474.2907 | 473.275 | -0.0084 | 474.2823 | 52  | 43.1 | Trp-Ile-Arg                                       |
| 474.2907 | 473.275 | -0.0084 | 474.2823 | 44  | 32.2 | Leu-Trp-Arg                                       |
| 474.2907 | 473.275 | -0.0084 | 474.2823 | 37  | 24.6 | Ile-Trp-Arg                                       |
| 170.1251 | 169.085 | -0.0327 | 170.0924 | 237 | 75.8 | L-Histidine, 3-methyl-                            |
| 170.1251 | 187.121 | -0.0075 | 170.1176 | 199 | 18.1 | 7-Keto-8-aminopelargonic acid                     |
| 170.1251 | 187.121 | -0.0075 | 170.1176 | 175 | 6.1  | 7-Keto-8-aminopelargonic acid                     |
| 474.2907 | 473.275 | -0.0084 | 474.2823 | 67  | 56.2 | Leu-Trp-Arg                                       |
| 474.2907 | 473.275 | -0.0084 | 474.2823 | 34  | 14.7 | Ile-Trp-Arg                                       |
| 474.2907 | 473.275 | -0.0084 | 474.2823 | 19  | 8.9  | Leu-Trp-Arg                                       |
| 474.2907 | 473.275 | -0.0084 | 474.2823 | 48  | 56.7 | Leu-Trp-Arg                                       |
| 474.2907 | 473.275 | -0.0084 | 474.2823 | 24  | 19   | Ile-Trp-Arg                                       |
| 474.2907 | 473.275 | -0.0084 | 474.2823 | 14  | 13.4 | Leu-Trp-Arg                                       |
| 458.3056 | 435.281 | -0.0357 | 458.2699 | 11  | 100  | N-Acetyl-S-geranylgeranyl-L-cysteine              |
| 400.355  | 400.343 | -0.0129 | 400.3421 | 36  | 18.8 | Palmitoyl-L-carnitine cation                      |
| 400.355  | 400.343 | -0.0129 | 400.3421 | 36  | 18.8 | Palmitoyl-L-carnitine cation                      |
| 400.355  | 400.343 | -0.0129 | 400.3421 | 34  | 17.3 | Palmitoyl-L-carnitine cation                      |
| 437.2353 | 436.207 | -0.021  | 437.2143 | 94  | 100  | Phe-Asp-Arg                                       |
| 170.1251 | 187.121 | -0.0075 | 170.1176 | 11  | 50   | 7-Keto-8-aminopelargonic acid                     |
| 170.1251 | 187.121 | -0.0075 | 170.1176 | 11  | 50   | 7-Keto-8-aminopelargonic acid                     |
| 655.4667 | 654.492 | 0.0324  | 655.4991 | 247 | 27.6 | Deca(propylene glycol) monobutyl ether            |
| 655.4667 | 654.492 | 0.0324  | 655.4991 | 240 | 21.1 | Deca(propylene glycol) monobutyl ether            |
| 655.4667 | 654.492 | 0.0324  | 655.4991 | 234 | 16.6 | Deca(propylene glycol) monobutyl ether            |
| 170.1251 | 187.121 | -0.0075 | 170.1176 | 105 | 27.5 | 7-Keto-8-aminopelargonic acid                     |
| 170.1251 | 187.121 | -0.0075 | 170.1176 | 101 | 23.3 | 7-Keto-8-aminopelargonic acid                     |
| 170.1251 | 169.074 | -0.0439 | 170.0812 | 89  | 15.5 | Pyridoxine                                        |

|          |         |         |          |     |      |                                                 |
|----------|---------|---------|----------|-----|------|-------------------------------------------------|
| 400.3206 | 400.343 | 0.0215  | 400.3421 | 15  | 100  | Palmitoyl-L-carnitine cation                    |
| 170.1251 | 169.085 | -0.0327 | 170.0924 | 262 | 41.6 | L-Histidine, 1-methyl-                          |
| 170.1251 | 169.085 | -0.0327 | 170.0924 | 261 | 41.6 | L-Histidine, 1-methyl-                          |
| 170.1251 | 169.085 | -0.0327 | 170.0924 | 259 | 41.6 | L-Histidine, 1-methyl-                          |
| 343.2943 | 408.288 | -0.03   | 343.2643 | 17  | 100  | Cholic acid                                     |
| 170.135  | 187.121 | -0.0174 | 170.1176 | 190 | 36.4 | 7-Keto-8-aminopelargonic acid                   |
| 170.135  | 187.121 | -0.0174 | 170.1176 | 186 | 30.7 | 7-Keto-8-aminopelargonic acid                   |
| 170.135  | 169.089 | -0.0386 | 170.0964 | 176 | 21.7 | Pyridine, 4-benzyl-                             |
| 461.2453 | 460.243 | 0.0054  | 461.2507 | 62  | 37.5 | Trp-Gln-Lys                                     |
| 461.2453 | 460.243 | 0.0054  | 461.2507 | 60  | 34.6 | Trp-Gln-Lys                                     |
| 461.2453 | 460.243 | 0.0054  | 461.2507 | 55  | 27.9 | Trp-Gln-Lys                                     |
| 170.1251 | 169.085 | -0.0327 | 170.0924 | 218 | 38.8 | L-Histidine, 3-methyl-                          |
| 170.1251 | 187.121 | -0.0075 | 170.1176 | 218 | 38.8 | 7-Keto-8-aminopelargonic acid                   |
| 170.1251 | 169.085 | -0.0327 | 170.0924 | 217 | 38.8 | L-Histidine, 3-methyl-                          |
| 787.6248 | 786.661 | 0.044   | 787.6688 | 211 | 18.6 | N-Docosanoyl-4-sphingenyl-1-O-phosphorylcholine |
| 787.6248 | 786.661 | 0.044   | 787.6688 | 203 | 13.9 | N-Docosanoyl-4-sphingenyl-1-O-phosphorylcholine |
| 787.6248 | 786.661 | 0.044   | 787.6688 | 198 | 11.2 | N-Docosanoyl-4-sphingenyl-1-O-phosphorylcholine |
| 461.2688 | 230.152 | 0.0421  | 461.3109 | 30  | 100  | Dodecanedioic acid                              |
| 170.135  | 187.121 | -0.0174 | 170.1176 | 236 | 37   | 7-Keto-8-aminopelargonic acid                   |
| 170.135  | 169     | -0.04   | 170.09   | 220 | 21.3 | 3-Methyl-L-histidine                            |
| 170.135  | 169.085 | -0.0426 | 170.0924 | 213 | 16.3 | L-Histidine, 3-methyl-                          |
| 655.4667 | 654.492 | 0.0324  | 655.4991 | 129 | 41.9 | Deca(propylene glycol) monobutyl ether          |
| 655.4667 | 654.492 | 0.0324  | 655.4991 | 119 | 29.6 | Deca(propylene glycol) monobutyl ether          |
| 655.4667 | 654.492 | 0.0324  | 655.4991 | 118 | 28.4 | Deca(propylene glycol) monobutyl ether          |
| 461.2904 | 230.163 | 0.043   | 461.3334 | 189 | 93.4 | Leu-Val                                         |
| 461.2904 | 230.152 | 0.0205  | 461.3109 | 86  | 6.6  | Dodecanedioic acid                              |
| 461.2904 | 230.163 | 0.043   | 461.3334 | 8   | 93.4 | Leu-Val                                         |
| 655.4667 | 654.492 | 0.0324  | 655.4991 | 124 | 37.2 | Deca(propylene glycol) monobutyl ether          |
| 655.4667 | 654.492 | 0.0324  | 655.4991 | 120 | 31.4 | Deca(propylene glycol) monobutyl ether          |
| 655.4667 | 654.492 | 0.0324  | 655.4991 | 120 | 31.4 | Deca(propylene glycol) monobutyl ether          |
| 400.3206 | 400.343 | 0.0215  | 400.3421 | 149 | 8.9  | Palmitoyl-L-carnitine cation                    |
| 400.3206 | 400.343 | 0.0215  | 400.3421 | 148 | 8.6  | Palmitoyl-L-carnitine cation                    |
| 400.3206 | 400.343 | 0.0215  | 400.3421 | 148 | 8.6  | Palmitoyl-L-carnitine cation                    |
| 170.14   | 187.121 | -0.0224 | 170.1176 | 341 | 56.5 | 7-Keto-8-aminopelargonic acid                   |
| 170.14   | 187.121 | -0.0224 | 170.1176 | 322 | 27.4 | 7-Keto-8-aminopelargonic acid                   |
| 170.14   | 169.085 | -0.0476 | 170.0924 | 283 | 6.5  | L-Histidine, 3-methyl-                          |
| 400.3206 | 400.343 | 0.0215  | 400.3421 | 343 | 16.5 | Palmitoyl-L-carnitine cation                    |
| 400.3206 | 400.343 | 0.0215  | 400.3421 | 338 | 13.3 | Palmitoyl-L-carnitine cation                    |



|          |         |         |          |     |      |                                                                        |
|----------|---------|---------|----------|-----|------|------------------------------------------------------------------------|
| 400.3206 | 400.343 | 0.0215  | 400.3421 | 338 | 13.3 | Palmitoyl-L-carnitine cation                                           |
| 655.4667 | 654.492 | 0.0324  | 655.4991 | 113 | 38.1 | Deca(propylene glycol) monobutyl ether                                 |
| 655.4667 | 654.492 | 0.0324  | 655.4991 | 109 | 32.2 | Deca(propylene glycol) monobutyl ether                                 |
| 655.4667 | 654.492 | 0.0324  | 655.4991 | 107 | 29.7 | Deca(propylene glycol) monobutyl ether                                 |
| 695.4097 | 672.473 | 0.0525  | 695.4622 | 14  | 100  | 1-Hexadecanoyl-2-(9Z,12Z-octadecadienoyl)-sn-glycero-3-phosphoric acid |
| 170.1444 | 187.121 | -0.0268 | 170.1176 | 120 | 46.6 | 7-Keto-8-aminopelargonic acid                                          |
| 170.1444 | 187.121 | -0.0268 | 170.1176 | 107 | 30.1 | 7-Keto-8-aminopelargonic acid                                          |
| 170.1444 | 169.085 | -0.052  | 170.0924 | 69  | 7.2  | L-Histidine, 3-methyl-                                                 |
| 695.4097 | 672.473 | 0.0525  | 695.4622 | 31  | 100  | 1-Hexadecanoyl-2-(9Z,12Z-octadecadienoyl)-sn-glycero-3-phosphoric acid |
| 400.3206 | 400.343 | 0.0215  | 400.3421 | 197 | 10   | Palmitoyl-L-carnitine cation                                           |
| 400.3206 | 400.343 | 0.0215  | 400.3421 | 194 | 8.8  | Palmitoyl-L-carnitine cation                                           |
| 400.3206 | 400.343 | 0.0215  | 400.3421 | 194 | 8.8  | Palmitoyl-L-carnitine cation                                           |
| 343.2827 | 342.256 | -0.0195 | 343.2632 | 93  | 100  | Retinyl propionate                                                     |
| 400.3206 | 400.343 | 0.0215  | 400.3421 | 302 | 12.5 | Palmitoyl-L-carnitine cation                                           |
| 400.3206 | 400.343 | 0.0215  | 400.3421 | 302 | 12.5 | Palmitoyl-L-carnitine cation                                           |
| 400.3206 | 400.343 | 0.0215  | 400.3421 | 302 | 12.5 | Palmitoyl-L-carnitine cation                                           |
| 170.1251 | 187.121 | -0.0075 | 170.1176 | 68  | 25.6 | 7-Keto-8-aminopelargonic acid                                          |
| 170.1251 | 187.121 | -0.0075 | 170.1176 | 61  | 19.6 | 7-Keto-8-aminopelargonic acid                                          |
| 170.1251 | 169.085 | -0.0327 | 170.0924 | 53  | 14.6 | L-Histidine, 1-methyl-                                                 |
| 472.291  | 471.314 | 0.03    | 472.321  | 47  | 100  | Terfenadine                                                            |
| 472.291  | 471.314 | 0.03    | 472.321  | 36  | 100  | Terfenadine                                                            |
| 458.3056 | 435.281 | -0.0357 | 458.2699 | 65  | 100  | N-Acetyl-S-geranylgeranyl-L-cysteine                                   |
| 414.2891 | 413     | 0.05    | 414.34   | 28  | 100  | Solasodine                                                             |
| 474.2907 | 473.275 | -0.0084 | 474.2823 | 24  | 100  | Ile-Trp-Arg                                                            |
| 170.1251 | 187.121 | -0.0075 | 170.1176 | 81  | 23.3 | 7-Keto-8-aminopelargonic acid                                          |
| 170.1251 | 187.121 | -0.0075 | 170.1176 | 78  | 20.5 | 7-Keto-8-aminopelargonic acid                                          |
| 170.1251 | 169.085 | -0.0327 | 170.0924 | 65  | 13.3 | L-Histidine, 3-methyl-                                                 |
| 414.259  | 413.239 | -0.0131 | 414.2459 | 40  | 29.8 | PyroGlu-Lys-Arg                                                        |
| 414.259  | 413.239 | -0.0131 | 414.2459 | 39  | 28.6 | PyroGlu-Lys-Arg                                                        |
| 414.259  | 413.239 | -0.0131 | 414.2459 | 37  | 26.4 | PyroGlu-Lys-Arg                                                        |
| 458.3056 | 435.281 | -0.0357 | 458.2699 | 30  | 100  | N-Acetyl-S-geranylgeranyl-L-cysteine                                   |
| 458.3056 | 435.281 | -0.0357 | 458.2699 | 51  | 100  | N-Acetyl-S-geranylgeranyl-L-cysteine                                   |
| 414.2746 | 449.314 | 0.0257  | 414.3003 | 50  | 100  | Glycodeoxycholic acid                                                  |
| 474.2907 | 473.275 | -0.0084 | 474.2823 | 58  | 50.9 | Leu-Trp-Arg                                                            |
| 474.2907 | 473.275 | -0.0084 | 474.2823 | 41  | 27.8 | Ile-Trp-Arg                                                            |
| 474.2907 | 473.275 | -0.0084 | 474.2823 | 34  | 21.3 | Trp-Ile-Arg                                                            |
| 518.3165 | 495.332 | 0.0052  | 518.3217 | 92  | 100  | 1-Hexadecanoyl-sn-glycero-3-phosphocholine                             |
| 474.2907 | 473.275 | -0.0084 | 474.2823 | 46  | 100  | Leu-Trp-Arg                                                            |
| 458.3056 | 435.281 | -0.0357 | 458.2699 | 64  | 100  | N-Acetyl-S-geranylgeranyl-L-cysteine                                   |

|          |         |         |          |     |      |                                        |
|----------|---------|---------|----------|-----|------|----------------------------------------|
| 474.2907 | 473.275 | -0.0084 | 474.2823 | 87  | 27.5 | Ile-Trp-Arg                            |
| 474.2907 | 473.275 | -0.0084 | 474.2823 | 66  | 11.7 | Ile-Trp-Arg                            |
| 474.2907 | 473.275 | -0.0084 | 474.2823 | 61  | 9.4  | Trp-Ile-Arg                            |
| 170.1251 | 169     | -0.04   | 170.09   | 278 | 32.5 | 3-Methyl-L-histidine                   |
| 170.1251 | 187.121 | -0.0075 | 170.1176 | 276 | 30   | 7-Keto-8-aminopelargonic acid          |
| 170.1251 | 169.085 | -0.0327 | 170.0924 | 272 | 25.4 | L-Histidine, 3-methyl-                 |
| 474.2907 | 473.275 | -0.0084 | 474.2823 | 27  | 30.1 | Leu-Trp-Arg                            |
| 474.2907 | 473.275 | -0.0084 | 474.2823 | 26  | 28.9 | Leu-Trp-Arg                            |
| 474.2907 | 473.275 | -0.0084 | 474.2823 | 23  | 25.5 | Ile-Trp-Arg                            |
| 655.4667 | 654.492 | 0.0324  | 655.4991 | 145 | 45.5 | Deca(propylene glycol) monobutyl ether |
| 655.4667 | 654.492 | 0.0324  | 655.4991 | 140 | 36.7 | Deca(propylene glycol) monobutyl ether |
| 655.4667 | 654.492 | 0.0324  | 655.4991 | 121 | 17.8 | Deca(propylene glycol) monobutyl ether |
| 170.1251 | 187.121 | -0.0075 | 170.1176 | 31  | 23.4 | 7-Keto-8-aminopelargonic acid          |
| 170.1251 | 187.121 | -0.0075 | 170.1176 | 31  | 23.4 | 7-Keto-8-aminopelargonic acid          |
| 170.1251 | 187.121 | -0.0075 | 170.1176 | 21  | 16.5 | 7-Keto-8-aminopelargonic acid          |
| 474.2907 | 473.275 | -0.0084 | 474.2823 | 53  | 64.7 | Leu-Trp-Arg                            |
| 474.2907 | 473.275 | -0.0084 | 474.2823 | 36  | 35.3 | Ile-Trp-Arg                            |
| 170.1251 | 187.121 | -0.0075 | 170.1176 | 50  | 25.9 | 7-Keto-8-aminopelargonic acid          |
| 170.1251 | 187.121 | -0.0075 | 170.1176 | 48  | 23.9 | 7-Keto-8-aminopelargonic acid          |
| 170.1251 | 187.121 | -0.0075 | 170.1176 | 31  | 13   | 7-Keto-8-aminopelargonic acid          |
| 474.2907 | 473.275 | -0.0084 | 474.2823 | 23  | 100  | Leu-Trp-Arg                            |
| 170.1251 | 187.121 | -0.0075 | 170.1176 | 71  | 36.4 | 7-Keto-8-aminopelargonic acid          |
| 170.1251 | 187.121 | -0.0075 | 170.1176 | 68  | 32.2 | 7-Keto-8-aminopelargonic acid          |
| 170.1251 | 187.121 | -0.0075 | 170.1176 | 47  | 13.7 | 7-Keto-8-aminopelargonic acid          |
| 474.2907 | 473.275 | -0.0084 | 474.2823 | 59  | 19.8 | Ile-Trp-Arg                            |
| 474.2907 | 473.275 | -0.0084 | 474.2823 | 57  | 18.2 | Leu-Trp-Arg                            |
| 474.2907 | 473.275 | -0.0084 | 474.2823 | 54  | 16.1 | Ile-Trp-Arg                            |
| 170.1251 | 187.121 | -0.0075 | 170.1176 | 133 | 46.7 | 7-Keto-8-aminopelargonic acid          |
| 170.1251 | 187.121 | -0.0075 | 170.1176 | 120 | 30.2 | 7-Keto-8-aminopelargonic acid          |
| 170.1251 | 187.121 | -0.0075 | 170.1176 | 77  | 6.7  | 7-Keto-8-aminopelargonic acid          |
| 170.1251 | 187.121 | -0.0075 | 170.1176 | 75  | 24.5 | 7-Keto-8-aminopelargonic acid          |
| 170.1251 | 187.121 | -0.0075 | 170.1176 | 73  | 22.6 | 7-Keto-8-aminopelargonic acid          |
| 170.1251 | 169.085 | -0.0327 | 170.0924 | 72  | 21.7 | L-Histidine, 3-methyl-                 |
| 422.2573 | 421.269 | 0.0189  | 422.2762 | 25  | 100  | Phe-Lys-Lys                            |
| 170.1251 | 187.121 | -0.0075 | 170.1176 | 113 | 32.2 | 7-Keto-8-aminopelargonic acid          |
| 170.1251 | 187.121 | -0.0075 | 170.1176 | 111 | 29.7 | 7-Keto-8-aminopelargonic acid          |
| 170.1251 | 169.085 | -0.0327 | 170.0924 | 108 | 26.2 | L-Histidine, 1-methyl-                 |
| 472.261  | 471.223 | -0.0307 | 472.2303 | 66  | 100  | PyroGlu-Trp-Arg                        |
| 458.3056 | 435.281 | -0.0357 | 458.2699 | 80  | 100  | N-Acetyl-S-geranylgeranyl-L-cysteine   |
| 170.1251 | 187.121 | -0.0075 | 170.1176 | 90  | 39   | 7-Keto-8-aminopelargonic acid          |
| 170.1251 | 187.121 | -0.0075 | 170.1176 | 88  | 36   | 7-Keto-8-aminopelargonic acid          |
| 170.1251 | 187.121 | -0.0075 | 170.1176 | 62  | 10.8 | 7-Keto-8-aminopelargonic acid          |
| 474.2907 | 473.275 | -0.0084 | 474.2823 | 61  | 100  | Ile-Trp-Arg                            |
| 458.2695 | 435.281 | 0.0004  | 458.2699 | 35  | 100  | N-Acetyl-S-geranylgeranyl-L-cysteine   |

|          |         |         |          |     |      |                                            |
|----------|---------|---------|----------|-----|------|--------------------------------------------|
| 458.2695 | 435.281 | 0.0004  | 458.2699 | 23  | 100  | N-Acetyl-S-geranylgeranyl-L-cysteine       |
| 458.2695 | 435.281 | 0.0004  | 458.2699 | 21  | 100  | N-Acetyl-S-geranylgeranyl-L-cysteine       |
| 518.277  | 495.332 | 0.0447  | 518.3217 | 60  | 100  | 1-Hexadecanoyl-sn-glycero-3-phosphocholine |
| 458.3056 | 435.281 | -0.0357 | 458.2699 | 33  | 100  | N-Acetyl-S-geranylgeranyl-L-cysteine       |
| 458.3056 | 435.281 | -0.0357 | 458.2699 | 30  | 100  | N-Acetyl-S-geranylgeranyl-L-cysteine       |
| 458.3056 | 435.281 | -0.0357 | 458.2699 | 27  | 100  | N-Acetyl-S-geranylgeranyl-L-cysteine       |
| 474.2449 | 473.275 | 0.0374  | 474.2823 | 68  | 38.8 | Trp-Ile-Arg                                |
| 474.2449 | 473.275 | 0.0374  | 474.2823 | 68  | 38.8 | Trp-Leu-Arg                                |
| 474.2449 | 473.275 | 0.0374  | 474.2823 | 52  | 22.4 | Ile-Trp-Arg                                |
| 515.3745 | 246.211 | 0.0373  | 515.4117 | 29  | 100  | Dodecyldimethylphosphine oxide             |
| 515.3745 | 246.211 | 0.0373  | 515.4117 | 9   | 100  | Dodecyldimethylphosphine oxide             |
| 515.3745 | 246.211 | 0.0373  | 515.4117 | 7   | 100  | Dodecyldimethylphosphine oxide             |
| 170.1251 | 187.121 | -0.0075 | 170.1176 | 124 | 37.5 | 7-Keto-8-aminopelargonic acid              |
| 170.1251 | 187.121 | -0.0075 | 170.1176 | 122 | 34.6 | 7-Keto-8-aminopelargonic acid              |
| 170.1251 | 169.085 | -0.0327 | 170.0924 | 117 | 27.9 | L-Histidine, 1-methyl-                     |
| 170.1251 | 187.121 | -0.0075 | 170.1176 | 129 | 38.4 | 7-Keto-8-aminopelargonic acid              |
| 170.1251 | 187.121 | -0.0075 | 170.1176 | 128 | 36.9 | 7-Keto-8-aminopelargonic acid              |
| 170.1251 | 169.085 | -0.0327 | 170.0924 | 116 | 24.6 | L-Histidine, 1-methyl-                     |
| 515.3601 | 246.211 | 0.0516  | 515.4117 | 44  | 100  | Dodecyldimethylphosphine oxide             |
| 474.2449 | 473.275 | 0.0374  | 474.2823 | 101 | 67.3 | Trp-Ile-Arg                                |
| 474.2449 | 473.275 | 0.0374  | 474.2823 | 82  | 32.7 | Ile-Trp-Arg                                |
| 458.2695 | 435.281 | 0.0004  | 458.2699 | 67  | 100  | N-Acetyl-S-geranylgeranyl-L-cysteine       |
| 170.1251 | 187.121 | -0.0075 | 170.1176 | 169 | 39.6 | 7-Keto-8-aminopelargonic acid              |
| 170.1251 | 187.121 | -0.0075 | 170.1176 | 158 | 27.2 | 7-Keto-8-aminopelargonic acid              |
| 170.1251 | 169.085 | -0.0327 | 170.0924 | 143 | 16.5 | L-Histidine, 3-methyl-                     |
| 474.2907 | 473.275 | -0.0084 | 474.2823 | 90  | 48.2 | Ile-Trp-Arg                                |
| 474.2907 | 473.275 | -0.0084 | 474.2823 | 85  | 38.8 | Trp-Ile-Arg                                |
| 474.2907 | 473.275 | -0.0084 | 474.2823 | 61  | 13   | Leu-Trp-Arg                                |
| 170.1251 | 187.121 | -0.0075 | 170.1176 | 187 | 49.9 | 7-Keto-8-aminopelargonic acid              |
| 170.1251 | 187.121 | -0.0075 | 170.1176 | 174 | 32.2 | 7-Keto-8-aminopelargonic acid              |
| 170.1251 | 169.085 | -0.0327 | 170.0924 | 133 | 7.3  | L-Histidine, 1-methyl-                     |
| 458.2578 | 435.281 | 0.0121  | 458.2699 | 132 | 100  | N-Acetyl-S-geranylgeranyl-L-cysteine       |
| 458.2578 | 435.281 | 0.0121  | 458.2699 | 99  | 100  | N-Acetyl-S-geranylgeranyl-L-cysteine       |
| 458.2578 | 435.281 | 0.0121  | 458.2699 | 97  | 100  | N-Acetyl-S-geranylgeranyl-L-cysteine       |
| 474.2907 | 473.275 | -0.0084 | 474.2823 | 77  | 56   | Trp-Ile-Arg                                |
| 474.2907 | 473.275 | -0.0084 | 474.2823 | 71  | 44   | Ile-Trp-Arg                                |
| 518.3165 | 495.332 | 0.0052  | 518.3217 | 72  | 100  | 1-Hexadecanoyl-sn-glycero-3-phosphocholine |
| 170.1251 | 187.121 | -0.0075 | 170.1176 | 196 | 53   | 7-Keto-8-aminopelargonic acid              |
| 170.1251 | 187.121 | -0.0075 | 170.1176 | 183 | 34.3 | 7-Keto-8-aminopelargonic acid              |
| 170.1251 | 187.121 | -0.0075 | 170.1176 | 138 | 7.3  | 7-Keto-8-aminopelargonic acid              |
| 170.1251 | 187.121 | -0.0075 | 170.1176 | 146 | 33.3 | 7-Keto-8-aminopelargonic acid              |
| 170.1251 | 187.121 | -0.0075 | 170.1176 | 143 | 29.5 | 7-Keto-8-aminopelargonic acid              |
| 170.1251 | 169.085 | -0.0327 | 170.0924 | 138 | 23.8 | L-Histidine, 1-methyl-                     |
| 474.2907 | 473.275 | -0.0084 | 474.2823 | 48  | 100  | Ile-Trp-Arg                                |
| 400.3206 | 400.343 | 0.0215  | 400.3421 | 36  | 56   | Palmitoyl-L-carnitine cation               |

|          |         |         |          |     |      |                                                |
|----------|---------|---------|----------|-----|------|------------------------------------------------|
| 400.3206 | 400.343 | 0.0215  | 400.3421 | 30  | 44   | Palmitoyl-L-carnitine cation                   |
| 458.3056 | 435.281 | -0.0357 | 458.2699 | 66  | 100  | N-Acetyl-S-geranylgeranyl-L-cysteine           |
| 170.1251 | 187.121 | -0.0075 | 170.1176 | 194 | 46.8 | 7-Keto-8-aminopelargonic acid                  |
| 170.1251 | 187.121 | -0.0075 | 170.1176 | 185 | 34   | 7-Keto-8-aminopelargonic acid                  |
| 170.1251 | 187.121 | -0.0075 | 170.1176 | 143 | 7.6  | 7-Keto-8-aminopelargonic acid                  |
| 170.1251 | 187.121 | -0.0075 | 170.1176 | 143 | 40.3 | 7-Keto-8-aminopelargonic acid                  |
| 170.1251 | 187.121 | -0.0075 | 170.1176 | 132 | 27.7 | 7-Keto-8-aminopelargonic acid                  |
| 170.1251 | 169.085 | -0.0327 | 170.0924 | 116 | 15.9 | L-Histidine, 1-methyl-                         |
| 458.2403 | 435.281 | 0.0296  | 458.2699 | 85  | 79.3 | N-Acetyl-S-geranylgeranyl-L-cysteine           |
| 458.2403 | 457.244 | 0.011   | 458.251  | 52  | 20.7 | Pro-Trp-Arg                                    |
| 400.3206 | 401.278 | -0.0501 | 400.2705 | 60  | 73.2 | Myriocin                                       |
| 400.3206 | 400.343 | 0.0215  | 400.3421 | 37  | 26.8 | Palmitoyl-L-carnitine cation                   |
| 170.1251 | 187.121 | -0.0075 | 170.1176 | 204 | 65.7 | 7-Keto-8-aminopelargonic acid                  |
| 170.1251 | 187.121 | -0.0075 | 170.1176 | 181 | 24   | 7-Keto-8-aminopelargonic acid                  |
| 170.1251 | 169.085 | -0.0327 | 170.0924 | 132 | 4.9  | L-Histidine, 1-methyl-                         |
| 458.3056 | 435.281 | -0.0357 | 458.2699 | 58  | 100  | N-Acetyl-S-geranylgeranyl-L-cysteine           |
| 655.4667 | 654.492 | 0.0324  | 655.4991 | 107 | 45.9 | Deca(propylene glycol) monobutyl ether         |
| 655.4667 | 654.492 | 0.0324  | 655.4991 | 93  | 28.7 | Deca(propylene glycol) monobutyl ether         |
| 655.4667 | 654.492 | 0.0324  | 655.4991 | 90  | 25.4 | Deca(propylene glycol) monobutyl ether         |
| 170.1251 | 187.121 | -0.0075 | 170.1176 | 122 | 38.5 | 7-Keto-8-aminopelargonic acid                  |
| 170.1251 | 187.121 | -0.0075 | 170.1176 | 120 | 35.5 | 7-Keto-8-aminopelargonic acid                  |
| 170.1251 | 187.121 | -0.0075 | 170.1176 | 85  | 8.9  | 7-Keto-8-aminopelargonic acid                  |
| 414.259  | 413.202 | -0.0494 | 414.2096 | 115 | 49.9 | PyroGlu-Gln-Arg                                |
| 414.259  | 413.202 | -0.0494 | 414.2096 | 101 | 31.2 | PyroGlu-Gln-Arg                                |
| 414.259  | 413.202 | -0.0494 | 414.2096 | 86  | 18.9 | PyroGlu-Gln-Arg                                |
| 370.2484 | 370     | -0.04   | 370.21   | 205 | 41.3 | MGDG 7:0; [M+NH4-CO]+;<br>MGDG(2:0/5:0)        |
| 370.2484 | 370     | -0.04   | 370.21   | 205 | 41.3 | MGDG 7:0; [M+NH4-CO]+;<br>MGDG(5:0/2:0)        |
| 370.2484 | 369.288 | 0.0468  | 370.2952 | 113 | 3.5  | N-Oleoyl-L-serine                              |
| 343.2757 | 342.256 | -0.0125 | 343.2632 | 109 | 56.3 | Retinyl propionate                             |
| 343.2757 | 408.288 | -0.0114 | 343.2643 | 95  | 35.2 | Cholic acid                                    |
| 343.2757 | 408.288 | -0.0114 | 343.2643 | 92  | 35.2 | Cholic acid                                    |
| 170.1251 | 187.121 | -0.0075 | 170.1176 | 201 | 48.4 | 7-Keto-8-aminopelargonic acid                  |
| 170.1251 | 187.121 | -0.0075 | 170.1176 | 195 | 38   | 7-Keto-8-aminopelargonic acid                  |
| 170.1251 | 169.085 | -0.0327 | 170.0924 | 145 | 7.7  | L-Histidine, 1-methyl-                         |
| 518.3165 | 495.332 | 0.0052  | 518.3217 | 83  | 100  | 1-Hexadecanoyl-sn-glycero-3-<br>phosphocholine |
| 458.3056 | 435.281 | -0.0357 | 458.2699 | 46  | 100  | N-Acetyl-S-geranylgeranyl-L-cysteine           |
| 170.1251 | 187.121 | -0.0075 | 170.1176 | 142 | 59.5 | 7-Keto-8-aminopelargonic acid                  |
| 170.1251 | 187.121 | -0.0075 | 170.1176 | 125 | 32.5 | 7-Keto-8-aminopelargonic acid                  |
| 170.1251 | 187.121 | -0.0075 | 170.1176 | 89  | 8    | 7-Keto-8-aminopelargonic acid                  |
| 474.2907 | 473.275 | -0.0084 | 474.2823 | 59  | 36.5 | Leu-Trp-Arg                                    |
| 474.2907 | 473.275 | -0.0084 | 474.2823 | 43  | 21   | Ile-Trp-Arg                                    |

|          |         |         |          |     |      |                                            |
|----------|---------|---------|----------|-----|------|--------------------------------------------|
| 474.2907 | 473.275 | -0.0084 | 474.2823 | 38  | 16.9 | Trp-Ile-Arg                                |
| 458.3056 | 435.281 | -0.0357 | 458.2699 | 48  | 100  | N-Acetyl-S-geranylgeranyl-L-cysteine       |
| 458.3056 | 435.281 | -0.0357 | 458.2699 | 36  | 100  | N-Acetyl-S-geranylgeranyl-L-cysteine       |
| 458.3056 | 435.281 | -0.0357 | 458.2699 | 35  | 100  | N-Acetyl-S-geranylgeranyl-L-cysteine       |
| 170.1251 | 187.121 | -0.0075 | 170.1176 | 156 | 48.5 | 7-Keto-8-aminopelargonic acid              |
| 170.1251 | 187.121 | -0.0075 | 170.1176 | 152 | 41   | 7-Keto-8-aminopelargonic acid              |
| 170.1251 | 187.121 | -0.0075 | 170.1176 | 110 | 9.2  | 7-Keto-8-aminopelargonic acid              |
| 474.2907 | 473.275 | -0.0084 | 474.2823 | 50  | 40.2 | Ile-Trp-Arg                                |
| 474.2907 | 473.275 | -0.0084 | 474.2823 | 49  | 38.7 | Leu-Trp-Arg                                |
| 474.2907 | 473.275 | -0.0084 | 474.2823 | 32  | 21.1 | Ile-Trp-Arg                                |
| 458.3056 | 435.281 | -0.0357 | 458.2699 | 39  | 100  | N-Acetyl-S-geranylgeranyl-L-cysteine       |
| 458.3056 | 435.281 | -0.0357 | 458.2699 | 28  | 100  | N-Acetyl-S-geranylgeranyl-L-cysteine       |
| 170.1251 | 187.121 | -0.0075 | 170.1176 | 221 | 52   | 7-Keto-8-aminopelargonic acid              |
| 170.1251 | 187.121 | -0.0075 | 170.1176 | 213 | 38.8 | 7-Keto-8-aminopelargonic acid              |
| 170.1251 | 187.121 | -0.0075 | 170.1176 | 158 | 7.5  | 7-Keto-8-aminopelargonic acid              |
| 414.259  | 413.202 | -0.0494 | 414.2096 | 75  | 100  | PyroGlu-Gln-Arg                            |
| 458.3056 | 435.281 | -0.0357 | 458.2699 | 56  | 100  | N-Acetyl-S-geranylgeranyl-L-cysteine       |
| 474.2907 | 473.275 | -0.0084 | 474.2823 | 39  | 100  | Ile-Trp-Arg                                |
| 170.1251 | 187.121 | -0.0075 | 170.1176 | 215 | 62.3 | 7-Keto-8-aminopelargonic acid              |
| 170.1251 | 187.121 | -0.0075 | 170.1176 | 195 | 28.4 | 7-Keto-8-aminopelargonic acid              |
| 170.1251 | 187.121 | -0.0075 | 170.1176 | 128 | 4.4  | 7-Keto-8-aminopelargonic acid              |
| 400.3206 | 401.278 | -0.0501 | 400.2705 | 48  | 44.7 | Myriocin                                   |
| 400.3206 | 401.278 | -0.0501 | 400.2705 | 47  | 44.7 | Myriocin                                   |
| 400.3206 | 400.343 | 0.0215  | 400.3421 | 28  | 20.4 | Palmitoyl-L-carnitine cation               |
| 170.1251 | 187.121 | -0.0075 | 170.1176 | 192 | 59.3 | 7-Keto-8-aminopelargonic acid              |
| 170.1251 | 187.121 | -0.0075 | 170.1176 | 174 | 30.6 | 7-Keto-8-aminopelargonic acid              |
| 170.1251 | 169.085 | -0.0327 | 170.0924 | 142 | 8.2  | L-Histidine, 1-methyl-                     |
| 518.3165 | 495.332 | 0.0052  | 518.3217 | 133 | 100  | 1-Hexadecanoyl-sn-glycero-3-phosphocholine |
| 170.1251 | 187.121 | -0.0075 | 170.1176 | 227 | 50.4 | 7-Keto-8-aminopelargonic acid              |
| 170.1251 | 187.121 | -0.0075 | 170.1176 | 218 | 36.6 | 7-Keto-8-aminopelargonic acid              |
| 170.1251 | 187.121 | -0.0075 | 170.1176 | 180 | 8.8  | 7-Keto-8-aminopelargonic acid              |
| 458.3056 | 435.281 | -0.0357 | 458.2699 | 65  | 100  | N-Acetyl-S-geranylgeranyl-L-cysteine       |
| 400.3206 | 400.343 | 0.0215  | 400.3421 | 38  | 100  | Palmitoyl-L-carnitine cation               |
| 170.1251 | 187.121 | -0.0075 | 170.1176 | 248 | 45.4 | 7-Keto-8-aminopelargonic acid              |
| 170.1251 | 187.121 | -0.0075 | 170.1176 | 246 | 41.9 | 7-Keto-8-aminopelargonic acid              |
| 170.1251 | 169.085 | -0.0327 | 170.0924 | 203 | 9.2  | L-Histidine, 1-methyl-                     |
| 518.3165 | 495.332 | 0.0052  | 518.3217 | 64  | 100  | 1-Hexadecanoyl-sn-glycero-3-phosphocholine |
| 170.135  | 187.121 | -0.0174 | 170.1176 | 175 | 41.8 | 7-Keto-8-aminopelargonic acid              |
| 170.135  | 187.121 | -0.0174 | 170.1176 | 173 | 38.5 | 7-Keto-8-aminopelargonic acid              |
| 170.135  | 169.085 | -0.0426 | 170.0924 | 118 | 7.5  | L-Histidine, 1-methyl-                     |
| 400.3206 | 400.343 | 0.0215  | 400.3421 | 82  | 37   | Palmitoyl-L-carnitine cation               |
| 400.3206 | 400.343 | 0.0215  | 400.3421 | 80  | 34.1 | Palmitoyl-L-carnitine cation               |
| 400.3206 | 400.343 | 0.0215  | 400.3421 | 76  | 28.8 | Palmitoyl-L-carnitine cation               |
| 414.2746 | 413.239 | -0.0287 | 414.2459 | 75  | 35.7 | PyroGlu-Lys-Arg                            |
| 414.2746 | 413.239 | -0.0287 | 414.2459 | 67  | 26.6 | PyroGlu-Lys-Arg                            |

|          |         |         |          |     |      |                                            |
|----------|---------|---------|----------|-----|------|--------------------------------------------|
| 414.2746 | 413.239 | -0.0287 | 414.2459 | 60  | 20.4 | PyroGlu-Lys-Arg                            |
| 414.2746 | 413.239 | -0.0287 | 414.2459 | 49  | 39   | PyroGlu-Lys-Arg                            |
| 414.2746 | 413.239 | -0.0287 | 414.2459 | 30  | 18.9 | PyroGlu-Lys-Arg                            |
| 414.2746 | 413.239 | -0.0287 | 414.2459 | 28  | 17.5 | PyroGlu-Lys-Arg                            |
| 170.1251 | 187.121 | -0.0075 | 170.1176 | 235 | 62.2 | 7-Keto-8-aminopelargonic acid              |
| 170.1251 | 187.121 | -0.0075 | 170.1176 | 213 | 24.6 | 7-Keto-8-aminopelargonic acid              |
| 170.1251 | 169.085 | -0.0327 | 170.0924 | 189 | 8.2  | L-Histidine, 1-methyl-                     |
| 343.2873 | 408.288 | -0.0231 | 343.2643 | 45  | 100  | Cholic acid                                |
| 343.2873 | 408.288 | -0.0231 | 343.2643 | 34  | 100  | Cholic acid                                |
| 343.2873 | 408.288 | -0.0231 | 343.2643 | 24  | 100  | Cholic acid                                |
| 414.2746 | 413.239 | -0.0287 | 414.2459 | 101 | 68.7 | PyroGlu-Lys-Arg                            |
| 414.2746 | 413.239 | -0.0287 | 414.2459 | 81  | 31.3 | PyroGlu-Lys-Arg                            |
| 170.135  | 187.121 | -0.0174 | 170.1176 | 219 | 47.1 | 7-Keto-8-aminopelargonic acid              |
| 170.135  | 187.121 | -0.0174 | 170.1176 | 208 | 32.3 | 7-Keto-8-aminopelargonic acid              |
| 170.135  | 187.121 | -0.0174 | 170.1176 | 152 | 6.2  | 7-Keto-8-aminopelargonic acid              |
| 458.3056 | 435.281 | -0.0357 | 458.2699 | 58  | 100  | N-Acetyl-S-geranylgeranyl-L-cysteine       |
| 518.3165 | 495.332 | 0.0052  | 518.3217 | 63  | 100  | 1-Hexadecanoyl-sn-glycero-3-phosphocholine |
| 400.3206 | 400.343 | 0.0215  | 400.3421 | 87  | 25.1 | Palmitoyl-L-carnitine cation               |
| 400.3206 | 400.343 | 0.0215  | 400.3421 | 85  | 23.2 | Palmitoyl-L-carnitine cation               |
| 400.3206 | 400.343 | 0.0215  | 400.3421 | 82  | 20.5 | Palmitoyl-L-carnitine cation               |
| 474.2907 | 473.275 | -0.0084 | 474.2823 | 32  | 100  | Ile-Trp-Arg                                |
| 170.1251 | 169.085 | -0.0327 | 170.0924 | 166 | 36.4 | L-Histidine, 1-methyl-                     |
| 170.1251 | 169.085 | -0.0327 | 170.0924 | 165 | 36.4 | L-Histidine, 1-methyl-                     |
| 170.1251 | 169.085 | -0.0327 | 170.0924 | 164 | 36.4 | L-Histidine, 1-methyl-                     |
| 343.2757 | 342.256 | -0.0125 | 343.2632 | 95  | 100  | Retinyl propionate                         |
| 458.3056 | 435.281 | -0.0357 | 458.2699 | 76  | 100  | N-Acetyl-S-geranylgeranyl-L-cysteine       |
| 414.2746 | 413.239 | -0.0287 | 414.2459 | 95  | 100  | PyroGlu-Lys-Arg                            |
| 170.1251 | 187.121 | -0.0075 | 170.1176 | 262 | 50.8 | 7-Keto-8-aminopelargonic acid              |
| 170.1251 | 187.121 | -0.0075 | 170.1176 | 253 | 36.9 | 7-Keto-8-aminopelargonic acid              |
| 170.1251 | 169.085 | -0.0327 | 170.0924 | 208 | 7.9  | L-Histidine, 3-methyl-                     |
| 458.3056 | 435.281 | -0.0357 | 458.2699 | 65  | 100  | N-Acetyl-S-geranylgeranyl-L-cysteine       |
| 170.1251 | 187.121 | -0.0075 | 170.1176 | 229 | 44.8 | 7-Keto-8-aminopelargonic acid              |
| 170.1251 | 187.121 | -0.0075 | 170.1176 | 216 | 28.9 | 7-Keto-8-aminopelargonic acid              |
| 170.1251 | 169.085 | -0.0327 | 170.0924 | 197 | 14.1 | L-Histidine, 1-methyl-                     |
| 170.1251 | 169.085 | -0.0327 | 170.0924 | 235 | 37   | L-Histidine, 1-methyl-                     |
| 170.1251 | 169.085 | -0.0327 | 170.0924 | 233 | 37   | L-Histidine, 1-methyl-                     |
| 170.1251 | 169.085 | -0.0327 | 170.0924 | 232 | 37   | L-Histidine, 1-methyl-                     |
| 458.3056 | 435.281 | -0.0357 | 458.2699 | 58  | 100  | N-Acetyl-S-geranylgeranyl-L-cysteine       |
| 474.2642 | 473.275 | 0.0181  | 474.2823 | 53  | 41.8 | Leu-Trp-Arg                                |
| 474.2642 | 473.275 | 0.0181  | 474.2823 | 48  | 33.7 | Ile-Trp-Arg                                |
| 474.2642 | 473.275 | 0.0181  | 474.2823 | 39  | 24.5 | Ile-Trp-Arg                                |
| 170.1251 | 169.085 | -0.0327 | 170.0924 | 206 | 37.1 | L-Histidine, 1-methyl-                     |
| 170.1251 | 169.085 | -0.0327 | 170.0924 | 204 | 37.1 | L-Histidine, 1-methyl-                     |
| 170.1251 | 169.085 | -0.0327 | 170.0924 | 204 | 37.1 | L-Histidine, 1-methyl-                     |
| 458.3056 | 435.281 | -0.0357 | 458.2699 | 39  | 100  | N-Acetyl-S-geranylgeranyl-L-cysteine       |
| 170.1251 | 187.121 | -0.0075 | 170.1176 | 225 | 40.9 | 7-Keto-8-aminopelargonic acid              |

|          |         |         |          |     |      |                                                |
|----------|---------|---------|----------|-----|------|------------------------------------------------|
| 170.1251 | 187.121 | -0.0075 | 170.1176 | 223 | 37.7 | 7-Keto-8-aminopelargonic acid                  |
| 170.1251 | 169.085 | -0.0327 | 170.0924 | 168 | 7.3  | L-Histidine, 1-methyl-                         |
| 474.2907 | 473.275 | -0.0084 | 474.2823 | 41  | 73.2 | Ile-Trp-Arg                                    |
| 474.2907 | 473.275 | -0.0084 | 474.2823 | 18  | 26.8 | Ile-Trp-Arg                                    |
| 343.2757 | 342.256 | -0.0125 | 343.2632 | 117 | 86.1 | Retinyl propionate                             |
| 343.2757 | 408.288 | -0.0114 | 343.2643 | 52  | 13.9 | Cholic acid                                    |
| 343.2757 | 408.288 | -0.0114 | 343.2643 | 42  | 13.9 | Cholic acid                                    |
| 370.2484 | 370     | -0.04   | 370.21   | 167 | 31.2 | MGDG 7:0; [M+NH4-CO]+;<br>MGDG(2:0/5:0)        |
| 370.2484 | 370     | -0.04   | 370.21   | 167 | 31.2 | MGDG 7:0; [M+NH4-CO]+;<br>MGDG(5:0/2:0)        |
| 370.2484 | 369.288 | 0.0468  | 370.2952 | 101 | 4.9  | N-Oleoyl-L-serine                              |
| 170.1251 | 169.085 | -0.0327 | 170.0924 | 253 | 46.6 | L-Histidine, 1-methyl-                         |
| 170.1251 | 169.085 | -0.0327 | 170.0924 | 251 | 46.6 | L-Histidine, 1-methyl-                         |
| 170.1251 | 169.085 | -0.0327 | 170.0924 | 247 | 46.6 | L-Histidine, 1-methyl-                         |
| 370.2217 | 370     | -0.01   | 370.21   | 148 | 50   | MGDG 7:0; [M+NH4-CO]+;<br>MGDG(2:0/5:0)        |
| 370.2217 | 370     | -0.01   | 370.21   | 148 | 50   | MGDG 7:0; [M+NH4-CO]+;<br>MGDG(5:0/2:0)        |
| 170.1251 | 169.085 | -0.0327 | 170.0924 | 382 | 79.6 | L-Histidine, 1-methyl-                         |
| 170.1251 | 169.085 | -0.0327 | 170.0924 | 381 | 79.6 | L-Histidine, 1-methyl-                         |
| 170.1251 | 169.085 | -0.0327 | 170.0924 | 377 | 79.6 | L-Histidine, 1-methyl-                         |
| 343.2757 | 408.288 | -0.0114 | 343.2643 | 55  | 100  | Cholic acid                                    |
| 343.2757 | 408.288 | -0.0114 | 343.2643 | 50  | 100  | Cholic acid                                    |
| 343.2757 | 408.288 | -0.0114 | 343.2643 | 40  | 100  | Cholic acid                                    |
| 370.2484 | 369.288 | 0.0468  | 370.2952 | 208 | 12.1 | N-Oleoyl-L-serine                              |
| 370.2484 | 369.288 | 0.0468  | 370.2952 | 207 | 11.7 | N-Oleoyl-L-serine                              |
| 370.2484 | 369.288 | 0.0468  | 370.2952 | 206 | 11.2 | N-Oleoyl-L-serine                              |
| 170.1251 | 169.085 | -0.0327 | 170.0924 | 336 | 71.4 | L-Histidine, 1-methyl-                         |
| 170.1251 | 169.085 | -0.0327 | 170.0924 | 336 | 71.4 | L-Histidine, 1-methyl-                         |
| 170.1251 | 169.085 | -0.0327 | 170.0924 | 331 | 71.4 | L-Histidine, 1-methyl-                         |
| 370.2484 | 370     | -0.04   | 370.21   | 181 | 34   | MGDG 7:0; [M+NH4-CO]+;<br>MGDG(2:0/5:0)        |
| 370.2484 | 370     | -0.04   | 370.21   | 181 | 34   | MGDG 7:0; [M+NH4-CO]+;<br>MGDG(5:0/2:0)        |
| 370.2484 | 369.288 | 0.0468  | 370.2952 | 125 | 6.5  | N-Oleoyl-L-serine                              |
| 518.3165 | 495.332 | 0.0052  | 518.3217 | 79  | 100  | 1-Hexadecanoyl-sn-glycero-3-<br>phosphocholine |
| 474.2907 | 473.275 | -0.0084 | 474.2823 | 57  | 100  | Leu-Trp-Arg                                    |
| 170.1251 | 169.085 | -0.0327 | 170.0924 | 266 | 44.5 | L-Histidine, 1-methyl-                         |
| 170.1251 | 187.121 | -0.0075 | 170.1176 | 258 | 33.2 | 7-Keto-8-aminopelargonic acid                  |
| 170.1251 | 169.085 | -0.0327 | 170.0924 | 256 | 44.5 | L-Histidine, 1-methyl-                         |
| 170.1251 | 169.085 | -0.0327 | 170.0924 | 269 | 60.2 | L-Histidine, 1-methyl-                         |
| 170.1251 | 169.085 | -0.0327 | 170.0924 | 266 | 60.2 | L-Histidine, 1-methyl-                         |
| 170.1251 | 169.085 | -0.0327 | 170.0924 | 264 | 60.2 | L-Histidine, 1-methyl-                         |
| 474.2907 | 473.275 | -0.0084 | 474.2823 | 25  | 42.4 | Ile-Trp-Arg                                    |
| 474.2907 | 473.275 | -0.0084 | 474.2823 | 20  | 34.2 | Ile-Trp-Arg                                    |

|          |         |         |          |     |      |                                         |
|----------|---------|---------|----------|-----|------|-----------------------------------------|
| 474.2907 | 473.275 | -0.0084 | 474.2823 | 9   | 23.4 | Leu-Trp-Arg                             |
| 170.1251 | 187.121 | -0.0075 | 170.1176 | 299 | 40.6 | 7-Keto-8-aminopelargonic acid           |
| 170.1251 | 169.085 | -0.0327 | 170.0924 | 287 | 27   | L-Histidine, 1-methyl-                  |
| 170.1251 | 169.085 | -0.0327 | 170.0924 | 286 | 27   | L-Histidine, 1-methyl-                  |
| 474.2907 | 473.275 | -0.0084 | 474.2823 | 29  | 100  | Ile-Trp-Arg                             |
| 170.1251 | 169.085 | -0.0327 | 170.0924 | 222 | 51.4 | L-Histidine, 1-methyl-                  |
| 170.1251 | 169.085 | -0.0327 | 170.0924 | 216 | 51.4 | L-Histidine, 1-methyl-                  |
| 170.1251 | 169.085 | -0.0327 | 170.0924 | 215 | 51.4 | L-Histidine, 1-methyl-                  |
| 170.1251 | 187.121 | -0.0075 | 170.1176 | 322 | 47   | 7-Keto-8-aminopelargonic acid           |
| 170.1251 | 169.085 | -0.0327 | 170.0924 | 305 | 25.6 | L-Histidine, 1-methyl-                  |
| 170.1251 | 169.085 | -0.0327 | 170.0924 | 304 | 25.6 | L-Histidine, 1-methyl-                  |
| 370.2484 | 370     | -0.04   | 370.21   | 141 | 13.7 | MGDG 7:0; [M+NH4-CO]+;<br>MGDG(2:0/5:0) |
| 370.2484 | 370     | -0.04   | 370.21   | 141 | 13.7 | MGDG 7:0; [M+NH4-CO]+;<br>MGDG(5:0/2:0) |
| 370.2484 | 369.288 | 0.0468  | 370.2952 | 135 | 10.8 | N-Oleoyl-L-serine                       |
| 170.1251 | 169.085 | -0.0327 | 170.0924 | 361 | 78.9 | L-Histidine, 1-methyl-                  |
| 170.1251 | 169.085 | -0.0327 | 170.0924 | 355 | 78.9 | L-Histidine, 1-methyl-                  |
| 170.1251 | 169.085 | -0.0327 | 170.0924 | 353 | 78.9 | L-Histidine, 1-methyl-                  |
| 474.2907 | 473.275 | -0.0084 | 474.2823 | 35  | 48   | Leu-Trp-Arg                             |
| 474.2907 | 473.275 | -0.0084 | 474.2823 | 19  | 27.6 | Ile-Trp-Arg                             |
| 474.2907 | 473.275 | -0.0084 | 474.2823 | 16  | 24.4 | Ile-Trp-Arg                             |
| 170.1251 | 169.085 | -0.0327 | 170.0924 | 309 | 65.2 | L-Histidine, 1-methyl-                  |
| 170.1251 | 169.085 | -0.0327 | 170.0924 | 308 | 65.2 | L-Histidine, 1-methyl-                  |
| 170.1251 | 169.085 | -0.0327 | 170.0924 | 307 | 65.2 | L-Histidine, 1-methyl-                  |
| 170.1251 | 187.121 | -0.0075 | 170.1176 | 237 | 30.7 | 7-Keto-8-aminopelargonic acid           |
| 170.1251 | 169.085 | -0.0327 | 170.0924 | 235 | 28.3 | L-Histidine, 3-methyl-                  |
| 170.1251 | 169.085 | -0.0327 | 170.0924 | 231 | 28.3 | L-Histidine, 3-methyl-                  |
| 370.1994 | 370     | 0.01    | 370.21   | 195 | 49.5 | MGDG 7:0; [M+NH4-CO]+;<br>MGDG(2:0/5:0) |
| 370.1994 | 370     | 0.01    | 370.21   | 195 | 49.5 | MGDG 7:0; [M+NH4-CO]+;<br>MGDG(5:0/2:0) |
| 370.1994 | 369.158 | -0.0345 | 370.1649 | 23  | 1    | Heroin                                  |
| 170.1251 | 169.085 | -0.0327 | 170.0924 | 313 | 76.5 | L-Histidine, 1-methyl-                  |
| 170.1251 | 169.085 | -0.0327 | 170.0924 | 310 | 76.5 | L-Histidine, 1-methyl-                  |
| 170.1251 | 169.085 | -0.0327 | 170.0924 | 309 | 76.5 | L-Histidine, 1-methyl-                  |
| 370.1994 | 370     | 0.01    | 370.21   | 138 | 48.5 | MGDG 7:0; [M+NH4-CO]+;<br>MGDG(2:0/5:0) |
| 370.1994 | 370     | 0.01    | 370.21   | 138 | 48.5 | MGDG 7:0; [M+NH4-CO]+;<br>MGDG(5:0/2:0) |
| 370.1994 | 369.158 | -0.0345 | 370.1649 | 24  | 3    | Heroin                                  |
| 170.1251 | 169.085 | -0.0327 | 170.0924 | 217 | 61.2 | L-Histidine, 1-methyl-                  |
| 170.1251 | 169.085 | -0.0327 | 170.0924 | 213 | 61.2 | L-Histidine, 1-methyl-                  |
| 170.1251 | 169.085 | -0.0327 | 170.0924 | 210 | 61.2 | L-Histidine, 1-methyl-                  |
| 474.2907 | 473.275 | -0.0084 | 474.2823 | 17  | 100  | Ile-Trp-Arg                             |
| 170.1251 | 187.121 | -0.0075 | 170.1176 | 208 | 36.6 | 7-Keto-8-aminopelargonic acid           |
| 170.1251 | 187.121 | -0.0075 | 170.1176 | 204 | 30.9 | 7-Keto-8-aminopelargonic acid           |



|          |         |         |          |     |      |                                         |
|----------|---------|---------|----------|-----|------|-----------------------------------------|
| 170.1251 | 169.085 | -0.0327 | 170.0924 | 193 | 21.2 | L-Histidine, 1-methyl-                  |
| 458.3056 | 435.281 | -0.0357 | 458.2699 | 35  | 100  | N-Acetyl-S-geranylgeranyl-L-cysteine    |
| 370.2084 | 370     | 0       | 370.21   | 131 | 48   | MGDG 7:0; [M+NH4-CO]+;<br>MGDG(2:0/5:0) |
| 370.2084 | 370     | 0       | 370.21   | 131 | 48   | MGDG 7:0; [M+NH4-CO]+;<br>MGDG(5:0/2:0) |
| 370.2084 | 369.158 | -0.0435 | 370.1649 | 41  | 4.1  | Heroin                                  |
| 170.1251 | 187.121 | -0.0075 | 170.1176 | 205 | 36.7 | 7-Keto-8-aminopelargonic acid           |
| 170.1251 | 187.121 | -0.0075 | 170.1176 | 196 | 26.6 | 7-Keto-8-aminopelargonic acid           |
| 170.1251 | 169.085 | -0.0327 | 170.0924 | 195 | 25.6 | L-Histidine, 1-methyl-                  |
| 474.2907 | 473.275 | -0.0084 | 474.2823 | 45  | 100  | Leu-Trp-Arg                             |
| 370.2484 | 370     | -0.04   | 370.21   | 127 | 29.6 | MGDG 7:0; [M+NH4-CO]+;<br>MGDG(2:0/5:0) |
| 370.2484 | 370     | -0.04   | 370.21   | 127 | 29.6 | MGDG 7:0; [M+NH4-CO]+;<br>MGDG(5:0/2:0) |
| 370.2484 | 369.288 | 0.0468  | 370.2952 | 61  | 4.7  | N-Oleoyl-L-serine                       |
| 170.1251 | 187.121 | -0.0075 | 170.1176 | 251 | 40.8 | 7-Keto-8-aminopelargonic acid           |
| 170.1251 | 169.085 | -0.0327 | 170.0924 | 235 | 23.5 | L-Histidine, 1-methyl-                  |
| 170.1251 | 187.121 | -0.0075 | 170.1176 | 235 | 23.5 | 7-Keto-8-aminopelargonic acid           |
| 370.2484 | 370     | -0.04   | 370.21   | 127 | 33.2 | MGDG 7:0; [M+NH4-CO]+;<br>MGDG(2:0/5:0) |
| 370.2484 | 370     | -0.04   | 370.21   | 127 | 33.2 | MGDG 7:0; [M+NH4-CO]+;<br>MGDG(5:0/2:0) |
| 370.2484 | 369.288 | 0.0468  | 370.2952 | 52  | 4.3  | N-Oleoyl-L-serine                       |
| 370.2484 | 370     | -0.04   | 370.21   | 145 | 16.9 | MGDG 7:0; [M+NH4-CO]+;<br>MGDG(2:0/5:0) |
| 370.2484 | 370     | -0.04   | 370.21   | 145 | 16.9 | MGDG 7:0; [M+NH4-CO]+;<br>MGDG(5:0/2:0) |
| 370.2484 | 369.288 | 0.0468  | 370.2952 | 122 | 6.2  | N-Oleoyl-L-serine                       |
| 170.1251 | 187.121 | -0.0075 | 170.1176 | 223 | 38.3 | 7-Keto-8-aminopelargonic acid           |
| 170.1251 | 169.085 | -0.0327 | 170.0924 | 217 | 30.1 | L-Histidine, 1-methyl-                  |
| 170.1251 | 169.085 | -0.0327 | 170.0924 | 212 | 30.1 | L-Histidine, 1-methyl-                  |
| 170.1251 | 169.085 | -0.0327 | 170.0924 | 299 | 60.9 | L-Histidine, 1-methyl-                  |
| 170.1251 | 169.085 | -0.0327 | 170.0924 | 293 | 60.9 | L-Histidine, 1-methyl-                  |
| 170.1251 | 169.085 | -0.0327 | 170.0924 | 293 | 60.9 | L-Histidine, 1-methyl-                  |
| 458.2578 | 435.281 | 0.0121  | 458.2699 | 47  | 43.4 | N-Acetyl-S-geranylgeranyl-L-cysteine    |
| 458.2578 | 457.244 | -0.007  | 458.251  | 29  | 22.4 | Pro-Trp-Arg                             |
| 458.2578 | 457.244 | -0.007  | 458.251  | 25  | 18.9 | Trp-Pro-Arg                             |
| 170.1251 | 187.121 | -0.0075 | 170.1176 | 264 | 55.1 | 7-Keto-8-aminopelargonic acid           |
| 170.1251 | 187.121 | -0.0075 | 170.1176 | 250 | 34.5 | 7-Keto-8-aminopelargonic acid           |
| 170.1251 | 187.121 | -0.0075 | 170.1176 | 195 | 6.7  | 7-Keto-8-aminopelargonic acid           |
| 474.2907 | 473.275 | -0.0084 | 474.2823 | 23  | 100  | Ile-Trp-Arg                             |
| 170.1251 | 187.121 | -0.0075 | 170.1176 | 222 | 55.9 | 7-Keto-8-aminopelargonic acid           |
| 170.1251 | 187.121 | -0.0075 | 170.1176 | 206 | 32.2 | 7-Keto-8-aminopelargonic acid           |
| 170.1251 | 169.085 | -0.0327 | 170.0924 | 170 | 8    | L-Histidine, 1-methyl-                  |
| 170.1251 | 187.121 | -0.0075 | 170.1176 | 211 | 46.9 | 7-Keto-8-aminopelargonic acid           |
| 170.1251 | 187.121 | -0.0075 | 170.1176 | 203 | 35   | 7-Keto-8-aminopelargonic acid           |

|          |         |         |          |     |      |                                                                   |
|----------|---------|---------|----------|-----|------|-------------------------------------------------------------------|
| 170.1251 | 169.085 | -0.0327 | 170.0924 | 150 | 6.9  | L-Histidine, 1-methyl-                                            |
| 170.1251 | 187.121 | -0.0075 | 170.1176 | 197 | 57.1 | 7-Keto-8-aminopelargonic acid                                     |
| 170.1251 | 187.121 | -0.0075 | 170.1176 | 178 | 27.7 | 7-Keto-8-aminopelargonic acid                                     |
| 170.1251 | 169.085 | -0.0327 | 170.0924 | 125 | 5.5  | L-Histidine, 1-methyl-                                            |
| 170.1251 | 187.121 | -0.0075 | 170.1176 | 265 | 58.1 | 7-Keto-8-aminopelargonic acid                                     |
| 170.1251 | 187.121 | -0.0075 | 170.1176 | 245 | 26.5 | 7-Keto-8-aminopelargonic acid                                     |
| 170.1251 | 169.085 | -0.0327 | 170.0924 | 208 | 6.4  | L-Histidine, 3-methyl-                                            |
| 474.2907 | 473.275 | -0.0084 | 474.2823 | 25  | 40.2 | Ile-Trp-Arg                                                       |
| 474.2907 | 473.275 | -0.0084 | 474.2823 | 20  | 32.4 | Ile-Trp-Arg                                                       |
| 474.2907 | 473.275 | -0.0084 | 474.2823 | 16  | 27.4 | Leu-Trp-Arg                                                       |
| 370.2484 | 370     | -0.04   | 370.21   | 148 | 37.6 | MGDG 7:0; [M+NH <sub>4</sub> -CO] <sup>+</sup> ;<br>MGDG(2:0/5:0) |
| 370.2484 | 370     | -0.04   | 370.21   | 148 | 37.6 | MGDG 7:0; [M+NH <sub>4</sub> -CO] <sup>+</sup> ;<br>MGDG(5:0/2:0) |
| 370.2484 | 369.288 | 0.0468  | 370.2952 | 67  | 4    | N-Oleoyl-L-serine                                                 |
| 414.2746 | 449.314 | 0.0257  | 414.3003 | 67  | 100  | Glycodeoxycholic acid                                             |
| 414.2746 | 449.314 | 0.0257  | 414.3003 | 51  | 100  | Glycodeoxycholic acid                                             |
| 472.291  | 471.314 | 0.03    | 472.321  | 51  | 100  | Terfenadine                                                       |
| 170.1251 | 187.121 | -0.0075 | 170.1176 | 385 | 73.1 | 7-Keto-8-aminopelargonic acid                                     |
| 170.1251 | 187.121 | -0.0075 | 170.1176 | 358 | 21.5 | 7-Keto-8-aminopelargonic acid                                     |
| 170.1251 | 187.121 | -0.0075 | 170.1176 | 287 | 3.1  | 7-Keto-8-aminopelargonic acid                                     |
| 170.1251 | 187.121 | -0.0075 | 170.1176 | 424 | 69.7 | 7-Keto-8-aminopelargonic acid                                     |
| 170.1251 | 187.121 | -0.0075 | 170.1176 | 384 | 16.2 | 7-Keto-8-aminopelargonic acid                                     |
| 170.1251 | 169.085 | -0.0327 | 170.0924 | 370 | 10.1 | L-Histidine, 1-methyl-                                            |
| 170.1251 | 187.121 | -0.0075 | 170.1176 | 398 | 73.5 | 7-Keto-8-aminopelargonic acid                                     |
| 170.1251 | 187.121 | -0.0075 | 170.1176 | 361 | 17.9 | 7-Keto-8-aminopelargonic acid                                     |
| 170.1251 | 169.085 | -0.0327 | 170.0924 | 337 | 6    | L-Histidine, 1-methyl-                                            |
| 414.2746 | 413.239 | -0.0287 | 414.2459 | 115 | 43.7 | PyroGlu-Arg-Lys                                                   |
| 414.2746 | 413.239 | -0.0287 | 414.2459 | 103 | 29.1 | PyroGlu-Arg-Lys                                                   |
| 414.2746 | 413.239 | -0.0287 | 414.2459 | 72  | 7.9  | PyroGlu-Lys-Arg                                                   |
| 170.1444 | 187.121 | -0.0268 | 170.1176 | 390 | 78.1 | 7-Keto-8-aminopelargonic acid                                     |
| 170.1444 | 187.121 | -0.0268 | 170.1176 | 338 | 15.6 | 7-Keto-8-aminopelargonic acid                                     |
| 170.1444 | 169.085 | -0.052  | 170.0924 | 291 | 3.3  | L-Histidine, 1-methyl-                                            |
| 787.6248 | 786.661 | 0.044   | 787.6688 | 111 | 100  | N-Docosanoyl-4-sphinganyl-1-O-phosphorylcholine                   |
| 195.1223 | 388.243 | 0.007   | 195.129  | 52  | 100  | Leu-Thr-Arg                                                       |
| 474.2907 | 473.275 | -0.0084 | 474.2823 | 55  | 100  | Leu-Trp-Arg                                                       |
| 170.14   | 187.121 | -0.0224 | 170.1176 | 279 | 70.4 | 7-Keto-8-aminopelargonic acid                                     |
| 170.14   | 187.121 | -0.0224 | 170.1176 | 246 | 18.4 | 7-Keto-8-aminopelargonic acid                                     |
| 170.14   | 169.085 | -0.0476 | 170.0924 | 212 | 4.7  | L-Histidine, 1-methyl-                                            |
| 472.291  | 471.314 | 0.03    | 472.321  | 102 | 100  | Terfenadine                                                       |
| 518.3165 | 495.332 | 0.0052  | 518.3217 | 50  | 100  | 1-Hexadecanoyl-sn-glycero-3-phosphocholine                        |
| 655.5166 | 654.492 | -0.0175 | 655.4991 | 241 | 100  | Deca(propylene glycol) monobutyl ether                            |
| 170.1251 | 169.085 | -0.0327 | 170.0924 | 362 | 66.9 | L-Histidine, 1-methyl-                                            |
| 170.1251 | 169.085 | -0.0327 | 170.0924 | 362 | 66.9 | L-Histidine, 1-methyl-                                            |

|          |         |         |          |     |      |                        |
|----------|---------|---------|----------|-----|------|------------------------|
| 170.1251 | 169.085 | -0.0327 | 170.0924 | 359 | 66.9 | L-Histidine, 1-methyl- |
| 461.3108 | 460.28  | -0.0237 | 461.2871 | 31  | 57.3 | Trp-Lys-Lys            |
| 461.3108 | 460.28  | -0.0237 | 461.2871 | 23  | 42.7 | Trp-Lys-Lys            |

**Table A12.** List of non-volatile metabolites (LC/MS) in sea water. Experiment was conducted using HILIC column in positive ion mode (refer to Materials and Methods section).

| Parent m/z | Mass    | Delta (m/z) | Library Precursor | Match Score | Probability (%) | Chem ID                      |
|------------|---------|-------------|-------------------|-------------|-----------------|------------------------------|
| 276.1945   | 275.159 | -0.0279     | 276.1666          | 174         | 68.4            | Arg-Thr                      |
| 276.1945   | 319.133 | -0.0438     | 276.1507          | 79          | 100             | Norfloxacin                  |
| 276.1945   | 275.152 | -0.0351     | 276.1594          | 176         | 74.1            | Methylenedioxypropylvalerone |
| 276.1945   | 275.152 | -0.0351     | 276.1594          | 218         | 89.8            | Methylenedioxypropylvalerone |
| 276.1945   | 275.159 | -0.0279     | 276.1666          | 131         | 57.5            | Arg-Thr                      |
| 276.1945   | 275.159 | -0.0279     | 276.1666          | 154         | 34.9            | Thr-Arg                      |
| 276.1945   | 275.159 | -0.0279     | 276.1666          | 142         | 62.3            | Arg-Thr                      |
| 276.1945   | 275.152 | -0.0351     | 276.1594          | 134         | 66.1            | Methylenedioxypropylvalerone |
| 276.1945   | 275.152 | -0.0351     | 276.1594          | 142         | 54              | Methylenedioxypropylvalerone |
| 276.1945   | 275.159 | -0.0279     | 276.1666          | 157         | 55.8            | Arg-Thr                      |
| 276.1945   | 319.133 | -0.0438     | 276.1507          | 171         | 79.5            | Norfloxacin                  |
| 276.1945   | 275.152 | -0.0351     | 276.1594          | 152         | 78.1            | Methylenedioxypropylvalerone |
| 150.1003   | 167.095 | -0.009      | 150.0913          | 264         | 90.4            | Synephrine                   |
| 150.1003   | 167.095 | -0.009      | 150.0913          | 325         | 87.6            | Synephrine                   |
| 150.1003   | 167.095 | -0.009      | 150.0913          | 203         | 45.9            | Synephrine                   |
| 150.1003   | 167.095 | -0.009      | 150.0913          | 225         | 60.8            | Synephrine                   |
| 150.0885   | 167.095 | 0.0028      | 150.0913          | 195         | 53.5            | Synephrine                   |
| 150.0885   | 149.07  | -0.0111     | 150.0774          | 343         | 94              | Adenine, N6-methyl           |
| 150.0885   | 149.07  | -0.0111     | 150.0774          | 244         | 86.3            | Adenine, N6-methyl           |
| 150.0885   | 167.095 | 0.0028      | 150.0913          | 262         | 42.8            | Synephrine                   |
| 205.1202   | 204.072 | -0.0408     | 205.0794          | 136         | 75.1            | Levamisole                   |
| 205.1202   | 408.237 | 0.0057      | 205.1259          | 154         | 16.9            | Tyr-Val-Lys                  |
| 205.1202   | 204.072 | -0.0408     | 205.0794          | 200         | 12.7            | Levamisole                   |
| 205.1202   | 204.072 | -0.0408     | 205.0794          | 257         | 56.2            | Levamisole                   |
| 205.1202   | 204.075 | -0.0383     | 205.0819          | 82          | 76.9            | Gly-Glu                      |
| 205.1202   | 188.116 | -0.0008     | 205.1194          | 173         | 75.3            | Glycyl-L-norleucine          |
| 205.1202   | 204.075 | -0.0383     | 205.0819          | 164         | 27.6            | Ala-Asp                      |
| 205.1202   | 408.212 | -0.0069     | 205.1133          | 227         | 23.1            | Phe-Ser-Arg                  |
| 150.0831   | 167.095 | 0.0082      | 150.0913          | 225         | 80.2            | Synephrine                   |
| 150.0831   | 167.095 | 0.0082      | 150.0913          | 261         | 38.8            | Synephrine                   |
| 150.0831   | 149.07  | -0.0057     | 150.0774          | 316         | 80.7            | Adenine, N6-methyl           |
| 150.0831   | 167.095 | 0.0082      | 150.0913          | 278         | 92              | Synephrine                   |
| 257.1363   | 256.117 | -0.0119     | 257.1244          | 103         | 34.5            | Thr-His                      |
| 257.1363   | 256.117 | -0.0119     | 257.1244          | 169         | 67              | Thr-His                      |
| 257.1363   | 256.117 | -0.0119     | 257.1244          | 201         | 24.7            | Thr-His                      |
| 257.1363   | 256.117 | -0.0119     | 257.1244          | 213         | 53.7            | Thr-His                      |
| 150.1003   | 303.147 | -0.009      | 150.0913          | 253         | 75.7            | Cocaine                      |
| 150.1003   | 149     | -0.02       | 150.08            | 277         | 39.7            | 3-Methyladenine              |
| 150.1003   | 149.07  | -0.0229     | 150.0774          | 213         | 69.4            | Adenine, N6-methyl           |
| 150.1003   | 149.07  | -0.0229     | 150.0774          | 293         | 36.4            | Adenine, N6-methyl           |
| 150.1003   | 167.095 | -0.009      | 150.0913          | 180         | 86.9            | Synephrine                   |

|          |         |         |          |     |      |                                                      |
|----------|---------|---------|----------|-----|------|------------------------------------------------------|
| 150.1003 | 149.105 | 0.0122  | 150.1125 | 218 | 67.1 | Triethanolamine                                      |
| 150.1003 | 167.095 | -0.009  | 150.0913 | 254 | 82.6 | Synephrine                                           |
| 150.1003 | 167.058 | -0.045  | 150.055  | 287 | 70.8 | 3-Methyl-2-nitrobenzyl alcohol                       |
| 150.0831 | 149.12  | 0.0446  | 150.1277 | 280 | 79   | Methamphetamine                                      |
| 150.0831 | 149.07  | -0.0057 | 150.0774 | 359 | 94   | Adenine, N6-methyl                                   |
| 150.0831 | 149.12  | 0.0446  | 150.1277 | 236 | 43   | Methamphetamine                                      |
| 150.0831 | 167.095 | 0.0082  | 150.0913 | 236 | 80.7 | Synephrine                                           |
| 150.0885 | 167.095 | 0.0028  | 150.0913 | 150 | 43.1 | Synephrine                                           |
| 150.0885 | 149.07  | -0.0111 | 150.0774 | 204 | 51.2 | Adenine, N6-methyl                                   |
| 150.0885 | 149.07  | -0.0111 | 150.0774 | 269 | 83.4 | Adenine, N6-methyl                                   |
| 150.0885 | 149.07  | -0.0111 | 150.0774 | 153 | 76.4 | Adenine, N6-methyl                                   |
| 176.0975 | 175     | -0.03   | 176.07   | 191 | 70.3 | 1-Methoxy-3-carbaldehyde                             |
| 176.0975 | 175     | -0.03   | 176.07   | 79  | 79.6 | 1-Methoxy-3-carbaldehyde                             |
| 176.0975 | 175     | -0.03   | 176.07   | 84  | 66   | 1-Methoxy-3-carbaldehyde                             |
| 283.1685 | 282.122 | -0.0396 | 283.1289 | 139 | 54.6 | Thr-Tyr                                              |
| 283.1685 | 282.179 | 0.0179  | 283.1864 | 260 | 67.7 | 1,3-Bis(tris(hydroxymethyl)methylamino)propane       |
| 283.1685 | 282.179 | 0.0179  | 283.1864 | 313 | 70.1 | 1,3-Bis(tris(hydroxymethyl)methylamino)propane       |
| 283.1685 | 282.179 | 0.0179  | 283.1864 | 309 | 79.3 | 1,3-Bis(tris(hydroxymethyl)methylamino)propane       |
| 257.1363 | 256.117 | -0.0119 | 257.1244 | 133 | 67.2 | Thr-His                                              |
| 257.1363 | 256.11  | -0.0191 | 257.1172 | 128 | 79.1 | Pterostilbene                                        |
| 257.1363 | 256.11  | -0.0191 | 257.1172 | 82  | 100  | Pterostilbene                                        |
| 257.1363 | 256.11  | -0.0191 | 257.1172 | 147 | 100  | Pterostilbene                                        |
| 225.1677 | 224.127 | -0.0331 | 225.1346 | 22  | 100  | Pirimicarb-desmethyl                                 |
| 225.1677 | 448.229 | -0.046  | 225.122  | 177 | 26.1 | His-His-Arg                                          |
| 225.1677 | 0       | -0.02   | 225.15   | 177 | 55.5 | Methyl jasmonate                                     |
| 225.1677 | 224.116 | -0.0443 | 225.1234 | 177 | 82.8 | Butalbital                                           |
| 238.1427 | 237.103 | -0.0319 | 238.1108 | 76  | 100  | 3-(Cyclohexylamino)-2-hydroxy-1-propanesulfonic acid |
| 238.1427 | 0       | -0.05   | 238.09   | 157 | 39.7 | Biopterin                                            |
| 238.1427 | 237.092 | -0.0434 | 238.0993 | 189 | 48.4 | Ketamine                                             |
| 238.1427 | 237.103 | -0.0319 | 238.1108 | 217 | 58.8 | Methionine sulphone, butyl ester                     |
| 150.1003 | 149     | -0.02   | 150.08   | 146 | 35.3 | 3-Methyladenine                                      |
| 150.1003 | 149.07  | -0.0229 | 150.0774 | 224 | 52.6 | Adenine, N6-methyl                                   |
| 150.1003 | 149.07  | -0.0229 | 150.0774 | 346 | 89.9 | Adenine, N6-methyl                                   |
| 150.1003 | 167.095 | -0.009  | 150.0913 | 340 | 72.7 | Synephrine                                           |
| 176.1195 | 175     | -0.05   | 176.07   | 129 | 100  | 1-Methoxy-3-carbaldehyde                             |
| 176.1195 | 175     | -0.05   | 176.07   | 136 | 71.4 | 1-Methoxy-3-carbaldehyde                             |
| 176.1195 | 175.096 | -0.017  | 176.103  | 46  | 37.1 | L-Citrulline                                         |

|          |         |         |          |     |      |                                |
|----------|---------|---------|----------|-----|------|--------------------------------|
| 266.1194 | 283.128 | 0.0054  | 266.1248 | 101 | 84.8 | His-Gln                        |
| 284.1259 | 283.164 | 0.0458  | 284.1717 | 142 | 51.9 | His-Lys                        |
| 284.1259 | 283.164 | 0.0458  | 284.1717 | 238 | 69.7 | His-Lys                        |
| 284.1259 | 283.164 | 0.0458  | 284.1717 | 150 | 34.8 | His-Lys                        |
| 284.1259 | 0       | 0.01    | 284.14   | 230 | 74.6 | His Gln                        |
| 150.0831 | 149     | 0       | 150.08   | 129 | 33.1 | 3-Methyladenine                |
| 150.0831 | 149.07  | -0.0057 | 150.0774 | 309 | 96.5 | Adenine, N6-methyl             |
| 150.0831 | 167.095 | 0.0082  | 150.0913 | 436 | 89.9 | Synephrine                     |
| 150.0831 | 149.07  | -0.0057 | 150.0774 | 146 | 47.8 | Adenine, N6-methyl             |
| 150.1003 | 167.095 | -0.009  | 150.0913 | 291 | 64.7 | Synephrine                     |
| 150.1003 | 167.058 | -0.045  | 150.055  | 277 | 68.6 | 3-Methyl-2-nitrobenzyl alcohol |
| 150.1003 | 149.07  | -0.0229 | 150.0774 | 232 | 35.8 | Adenine, N6-methyl             |
| 150.1003 | 167.058 | -0.045  | 150.055  | 264 | 78.8 | 3-Methyl-2-nitrobenzyl alcohol |
| 257.1594 | 256.117 | -0.035  | 257.1244 | 92  | 40.7 | His-Thr                        |
| 257.1594 | 256.11  | -0.0422 | 257.1172 | 187 | 49.6 | Pterostilbene                  |
| 257.1594 | 256.117 | -0.035  | 257.1244 | 228 | 39.1 | His-Thr                        |
| 257.1594 | 256.117 | -0.035  | 257.1244 | 235 | 38.2 | His-Thr                        |
| 289.1998 | 288.209 | 0.0164  | 289.2162 | 4   | 100  | 5-Androsten-3.beta.-ol-17-one  |
| 289.1998 | 288.209 | 0.0164  | 289.2162 | 16  | 12.5 | 5-Androsten-3.beta.-ol-17-one  |
| 289.1998 | 288.209 | 0.0164  | 289.2162 | 21  | 11.5 | 5.alpha.-Androstane-3,17-dione |
| 289.1998 | 288.209 | 0.0164  | 289.2162 | 42  | 13.9 | 5.alpha.-Androstane-3,17-dione |
| 276.1945 | 275.159 | -0.0279 | 276.1666 | 99  | 20.1 | Thr-Arg                        |
| 276.1945 | 275.159 | -0.0279 | 276.1666 | 99  | 52.6 | Arg-Thr                        |
| 276.1945 | 319.133 | -0.0438 | 276.1507 | 171 | 62.8 | Norfloxacin                    |
| 276.1945 | 0       | -0.03   | 276.16   | 189 | 24.6 | Homatropine                    |
| 276.1945 | 275.159 | -0.0279 | 276.1666 | 165 | 48.7 | Arg-Thr                        |
| 276.1945 | 275.152 | -0.0351 | 276.1594 | 139 | 57.4 | Methylenedioxypropyvalerone    |
| 276.1945 | 275.152 | -0.0351 | 276.1594 | 135 | 60   | Methylenedioxypropyvalerone    |
| 276.1945 | 275.152 | -0.0351 | 276.1594 | 104 | 57.4 | Methylenedioxypropyvalerone    |
| 276.1945 | 275.159 | -0.0279 | 276.1666 | 123 | 34   | Thr-Arg                        |
| 276.1945 | 275.152 | -0.0351 | 276.1594 | 159 | 47.9 | Methylenedioxypropyvalerone    |
| 276.1945 | 275.159 | -0.0279 | 276.1666 | 107 | 23.1 | Thr-Arg                        |
| 276.1945 | 275.152 | -0.0351 | 276.1594 | 170 | 79.3 | Methylenedioxypropyvalerone    |
| 205.1202 | 204.075 | -0.0383 | 205.0819 | 154 | 76.3 | Gly-Glu                        |
| 205.1202 | 204.09  | -0.023  | 205.0972 | 200 | 60.7 | L-Tryptophan                   |
| 205.1202 | 204.09  | -0.023  | 205.0972 | 253 | 57.5 | Fenozolone                     |
| 205.1202 | 204.072 | -0.0408 | 205.0794 | 352 | 57   | Levamisole                     |
| 205.1202 | 204.075 | -0.0383 | 205.0819 | 71  | 73   | Gly-Glu                        |
| 205.1202 | 204.09  | -0.023  | 205.0972 | 297 | 76.1 | L-Tryptophan                   |
| 205.1202 | 408.223 | -0.001  | 205.119  | 207 | 35.9 | Pro-His-Arg                    |
| 205.1202 | 204.072 | -0.0408 | 205.0794 | 331 | 70.2 | Levamisole                     |

|          |         |         |          |     |      |                                                |
|----------|---------|---------|----------|-----|------|------------------------------------------------|
| 150.0787 | 167.058 | -0.024  | 150.055  | 210 | 47.7 | 3-Methyl-2-nitrobenzyl alcohol                 |
| 150.0787 | 167.095 | 0.0126  | 150.0913 | 372 | 69.1 | Synephrine                                     |
| 150.0787 | 167.058 | -0.024  | 150.055  | 235 | 51   | 3-Methyl-2-nitrobenzyl alcohol                 |
| 150.0787 | 167.095 | 0.0126  | 150.0913 | 198 | 45.9 | Synephrine                                     |
| 205.1202 | 204.075 | -0.0383 | 205.0819 | 160 | 40.2 | Gly-Glu                                        |
| 205.1202 | 204.072 | -0.0408 | 205.0794 | 235 | 47.4 | Levamisole                                     |
| 205.1202 | 204.072 | -0.0408 | 205.0794 | 198 | 20.4 | Tetramisole                                    |
| 205.1202 | 204.072 | -0.0408 | 205.0794 | 291 | 73.3 | Levamisole                                     |
| 258.1748 | 275.148 | -0.03   | 258.1448 | 82  | 72.8 | Lys-Glu                                        |
| 258.1748 | 275.127 | -0.0511 | 258.1237 | 124 | 75.2 | Trp-Ala                                        |
| 258.1748 | 0       | 0.02    | 258.19   | 117 | 32.6 | Dextroprphan                                   |
| 258.1748 | 257.142 | -0.026  | 258.1488 | 268 | 93.2 | Medifoxamine                                   |
| 205.1202 | 204.075 | -0.0383 | 205.0819 | 82  | 53.1 | Gly-Glu                                        |
| 205.1202 | 204.075 | -0.0383 | 205.0819 | 184 | 94   | Gly-Glu                                        |
| 205.1202 | 204.09  | -0.023  | 205.0972 | 203 | 35.9 | L-Tryptophan                                   |
| 205.1202 | 408.237 | 0.0057  | 205.1259 | 258 | 41.4 | Tyr-Val-Lys                                    |
| 205.1202 | 204.072 | -0.0408 | 205.0794 | 80  | 65.5 | Levamisole                                     |
| 205.1202 | 204.09  | -0.023  | 205.0972 | 278 | 70.4 | L-Tryptophan                                   |
| 205.1202 | 204.1   | -0.013  | 205.107  | 224 | 30.2 | 1,6-Anhydro-b-D-glucose, permethyl-            |
| 205.1202 | 204.072 | -0.0408 | 205.0794 | 244 | 47.7 | Tetramisole                                    |
| 150.0885 | 149.07  | -0.0111 | 150.0774 | 281 | 60.4 | Adenine, N6-methyl                             |
| 150.0885 | 149.07  | -0.0111 | 150.0774 | 392 | 93.2 | Adenine, N6-methyl                             |
| 150.0885 | 149     | -0.01   | 150.08   | 280 | 51.8 | 3-Methyladenine                                |
| 150.0885 | 149.07  | -0.0111 | 150.0774 | 291 | 80.3 | Adenine, N6-methyl                             |
| 150.0885 | 167.095 | 0.0028  | 150.0913 | 200 | 63.7 | Synephrine                                     |
| 150.0885 | 149.07  | -0.0111 | 150.0774 | 212 | 77.3 | Adenine, N6-methyl                             |
| 150.0885 | 149.07  | -0.0111 | 150.0774 | 301 | 74.4 | Adenine, N6-methyl                             |
| 150.0885 | 149.07  | -0.0111 | 150.0774 | 294 | 47.4 | Adenine, N6-methyl                             |
| 176.1041 | 193.058 | -0.0494 | 176.0547 | 13  | 58.6 | S-(2-Boronoethyl)-L-cysteine                   |
| 176.1041 | 175     | -0.03   | 176.07   | 250 | 63.2 | 1-Methoxy-3-carbaldehyde                       |
| 283.1685 | 282.179 | 0.0179  | 283.1864 | 128 | 43.5 | 1,3-Bis(tris(hydroxymethyl)methylamino)propane |
| 283.1685 | 282.179 | 0.0179  | 283.1864 | 221 | 49.6 | 1,3-Bis(tris(hydroxymethyl)methylamino)propane |
| 283.1685 | 282.179 | 0.0179  | 283.1864 | 294 | 61.8 | 1,3-Bis(tris(hydroxymethyl)methylamino)propane |
| 283.1685 | 0       | -0.02   | 283.15   | 193 | 48.6 | Artemisinin                                    |
| 205.1202 | 204.075 | -0.0383 | 205.0819 | 96  | 51.3 | Gly-Glu                                        |
| 205.1202 | 204.072 | -0.0408 | 205.0794 | 247 | 71.7 | Levamisole                                     |
| 205.1202 | 204.09  | -0.023  | 205.0972 | 305 | 65.5 | Fenozolone                                     |

|          |         |         |          |     |      |                                                         |
|----------|---------|---------|----------|-----|------|---------------------------------------------------------|
| 205.1202 | 204.072 | -0.0408 | 205.0794 | 217 | 31.4 | Tetramisole                                             |
| 134.0966 | 151.1   | -0.0002 | 134.0964 | 18  | 11.6 | Norephedrine                                            |
| 134.0966 | 283.164 | -0.0204 | 134.0762 | 223 | 27   | Lys-His                                                 |
| 134.0966 | 134.11  | 0.012   | 134.109  | 206 | 20.7 | Benzene, n-butyl-                                       |
| 134.0966 | 135     | -0.05   | 134.05   | 220 | 72.1 | Adenine                                                 |
| 150.0885 | 167.095 | 0.0028  | 150.0913 | 195 | 88.2 | Synephrine                                              |
| 150.0885 | 149.07  | -0.0111 | 150.0774 | 228 | 50.2 | Adenine, N6-methyl                                      |
| 150.0885 | 149.07  | -0.0111 | 150.0774 | 244 | 54.9 | Adenine, N6-methyl                                      |
| 150.0885 | 149.07  | -0.0111 | 150.0774 | 247 | 84.4 | Adenine, N6-methyl                                      |
| 205.1202 | 204.075 | -0.0383 | 205.0819 | 165 | 76.5 | Gly-Glu                                                 |
| 205.1202 | 408.201 | -0.0125 | 205.1077 | 160 | 18.4 | Phe-Asp-Lys                                             |
| 205.1202 | 204.1   | -0.013  | 205.107  | 171 | 26.8 | 1,6-Anhydro-b-D-glucose,<br>permethyl-                  |
| 205.1202 | 408.223 | -0.001  | 205.119  | 237 | 23.6 | Pro-His-Arg                                             |
| 176.0975 | 175     | -0.03   | 176.07   | 111 | 100  | 1-Methoxy-3-carbaldehyde                                |
| 176.0975 | 175.048 | -0.0421 | 176.0554 | 67  | 33.5 | N-Acetyl-L-aspartic acid                                |
| 176.0975 | 175.063 | -0.0269 | 176.0706 | 31  | 100  | 3-Indoleacetic acid                                     |
| 257.1363 | 256.117 | -0.0119 | 257.1244 | 144 | 47   | Thr-His                                                 |
| 257.1363 | 256.117 | -0.0119 | 257.1244 | 128 | 78.9 | Thr-His                                                 |
| 257.1363 | 256.11  | -0.0191 | 257.1172 | 128 | 80.4 | Pterostilbene                                           |
| 257.1363 | 256.117 | -0.0119 | 257.1244 | 112 | 40.6 | Thr-His                                                 |
| 238.1227 | 237.103 | -0.0119 | 238.1108 | 152 | 78   | 3-(Cyclohexylamino)-2-hydroxy<br>1-propanesulfonic acid |
| 238.1227 | 237.086 | -0.0292 | 238.0935 | 130 | 37.5 | 6-Biopterin                                             |
| 238.1227 | 237.092 | -0.0234 | 238.0993 | 182 | 79   | Ketamine                                                |
| 238.1227 | 237.092 | -0.0234 | 238.0993 | 179 | 61.4 | Ketamine                                                |
| 150.0831 | 167.095 | 0.0082  | 150.0913 | 129 | 33.9 | Synephrine                                              |
| 150.0831 | 167.095 | 0.0082  | 150.0913 | 272 | 79.3 | Synephrine                                              |
| 150.0831 | 149.07  | -0.0057 | 150.0774 | 352 | 93.4 | Adenine, N6-methyl                                      |
| 150.0831 | 149.07  | -0.0057 | 150.0774 | 229 | 92.3 | Adenine, N6-methyl                                      |
| 176.0975 | 175     | -0.03   | 176.07   | 138 | 88.9 | 1-Methoxy-3-carbaldehyde                                |
| 176.0975 | 175     | -0.03   | 176.07   | 125 | 73.4 | 1-Methoxy-3-carbaldehyde                                |
| 176.0975 | 175     | -0.03   | 176.07   | 58  | 100  | 1-Methoxy-3-carbaldehyde                                |
| 176.0975 | 175.063 | -0.0269 | 176.0706 | 131 | 100  | 3-Indoleacetic acid                                     |
| 150.1003 | 167.095 | -0.009  | 150.0913 | 239 | 79.8 | Synephrine                                              |
| 150.1003 | 149.07  | -0.0229 | 150.0774 | 292 | 64.1 | Adenine, N6-methyl                                      |
| 150.1003 | 149.07  | -0.0229 | 150.0774 | 346 | 90.7 | Adenine, N6-methyl                                      |
| 150.1003 | 149.07  | -0.0229 | 150.0774 | 189 | 77.8 | Adenine, N6-methyl                                      |
| 150.1003 | 169.074 | -0.0442 | 150.0561 | 226 | 47   | DL-Norepinephrine                                       |
| 150.1003 | 167.095 | -0.009  | 150.0913 | 319 | 41   | Synephrine                                              |
| 150.1003 | 149.07  | -0.0229 | 150.0774 | 227 | 80   | Adenine, N6-methyl                                      |
| 150.1003 | 149.12  | 0.0274  | 150.1277 | 361 | 78.8 | Methamphetamine                                         |
| 231.0825 | 230.09  | 0.0151  | 231.0976 | 30  | 100  | Asp-Pro                                                 |
| 231.0825 | 230.103 | 0.0279  | 231.1104 | 83  | 53.1 | (m-<br>Trifluoromethylphenyl)piperazi<br>ne             |



|          |         |         |          |     |      |                                                |
|----------|---------|---------|----------|-----|------|------------------------------------------------|
| 231.0825 | 0       | 0.03    | 231.11   | 122 | 62.1 | N- (3-TRIFLUOROMETHYLPHENYL)PIPERAZINE (TFMPP) |
| 231.0825 | 0       | 0.03    | 231.11   | 93  | 100  | N- (3-TRIFLUOROMETHYLPHENYL)PIPERAZINE (TFMPP) |
| 276.1945 | 275.159 | -0.0279 | 276.1666 | 205 | 77.4 | Arg-Thr                                        |
| 276.1945 | 275.159 | -0.0279 | 276.1666 | 121 | 62.3 | Arg-Thr                                        |
| 276.1945 | 319.133 | -0.0438 | 276.1507 | 182 | 68   | Norfloxacin                                    |
| 276.1945 | 275.152 | -0.0351 | 276.1594 | 264 | 77.6 | Methylenedioxypropylvalerone                   |
| 276.1945 | 275.159 | -0.0279 | 276.1666 | 167 | 73.6 | Arg-Thr                                        |
| 276.1945 | 275.152 | -0.0351 | 276.1594 | 165 | 83.7 | Methylenedioxypropylvalerone                   |
| 276.1945 | 275.163 | -0.0238 | 276.1707 | 117 | 69   | Physostigmine                                  |
| 276.1945 | 275.152 | -0.0351 | 276.1594 | 246 | 69.8 | Methylenedioxypropylvalerone                   |
| 276.1945 | 275.159 | -0.0279 | 276.1666 | 203 | 83.2 | Arg-Thr                                        |
| 276.1945 | 319.133 | -0.0438 | 276.1507 | 170 | 74.8 | Norfloxacin                                    |
| 276.1945 | 275.159 | -0.0279 | 276.1666 | 114 | 38.2 | Arg-Thr                                        |
| 276.1945 | 275.159 | -0.0279 | 276.1666 | 155 | 25   | Arg-Thr                                        |
| 150.1003 | 303.147 | -0.009  | 150.0913 | 136 | 68.4 | Cocaine                                        |
| 150.1003 | 149.07  | -0.0229 | 150.0774 | 204 | 70   | Adenine, N6-methyl                             |
| 150.1003 | 149.07  | -0.0229 | 150.0774 | 158 | 72   | Adenine, N6-methyl                             |
| 150.1003 | 167.058 | -0.045  | 150.055  | 325 | 79.9 | 3-Methyl-2-nitrobenzyl alcohol                 |
| 150.1003 | 167.095 | -0.009  | 150.0913 | 159 | 78   | Synephrine                                     |
| 150.1003 | 149.07  | -0.0229 | 150.0774 | 289 | 73.6 | Adenine, N6-methyl                             |
| 150.1003 | 149.12  | 0.0274  | 150.1277 | 261 | 69.5 | Methamphetamine                                |
| 150.1003 | 149.07  | -0.0229 | 150.0774 | 236 | 92.2 | Adenine, N6-methyl                             |
| 205.1202 | 204.075 | -0.0383 | 205.0819 | 115 | 46.7 | Gly-Glu                                        |
| 205.1202 | 408.223 | -0.001  | 205.119  | 198 | 67.7 | Pro-His-Arg                                    |
| 205.1202 | 204.072 | -0.0408 | 205.0794 | 249 | 20.1 | Levamisole                                     |
| 205.1202 | 204.1   | -0.013  | 205.107  | 202 | 35.6 | 1,6-Anhydro-b-D-glucose, permethyl-            |
| 150.1003 | 167.095 | -0.009  | 150.0913 | 264 | 76.1 | Synephrine                                     |
| 150.1003 | 149.07  | -0.0229 | 150.0774 | 344 | 98.5 | Adenine, N6-methyl                             |
| 150.1003 | 149.12  | 0.0274  | 150.1277 | 177 | 61.2 | Methamphetamine                                |
| 150.1003 | 149.07  | -0.0229 | 150.0774 | 157 | 42.1 | Adenine, N6-methyl                             |
| 176.1041 | 175     | -0.03   | 176.07   | 59  | 82.2 | 1-Methoxy-3-carbaldehyde                       |
| 176.1041 | 175     | -0.03   | 176.07   | 80  | 85.6 | 1-Methoxy-3-carbaldehyde                       |
| 176.1041 | 175.063 | -0.0335 | 176.0706 | 254 | 84   | 3-Indoleacetic acid                            |
| 205.1202 | 204.072 | -0.0408 | 205.0794 | 192 | 93.3 | Tetramisole                                    |
| 205.1202 | 408.223 | -0.001  | 205.119  | 146 | 26.1 | Pro-His-Arg                                    |
| 205.1202 | 204.09  | -0.023  | 205.0972 | 319 | 70.7 | Fenozolone                                     |
| 205.1202 | 408.212 | -0.0069 | 205.1133 | 266 | 18.5 | Tyr-Ala-Arg                                    |
| 205.1202 | 204.075 | -0.0383 | 205.0819 | 81  | 62.3 | Ala-Asp                                        |
| 205.1202 | 204.09  | -0.023  | 205.0972 | 254 | 74.9 | Fenozolone                                     |

|          |         |         |          |     |      |                                                     |
|----------|---------|---------|----------|-----|------|-----------------------------------------------------|
| 205.1202 | 204.1   | -0.013  | 205.107  | 202 | 37.4 | 1,6-Anhydro-b-D-glucose, permethyl-                 |
| 205.1202 | 204.09  | -0.023  | 205.0972 | 284 | 39.1 | Fenozolone                                          |
| 150.1003 | 303.147 | -0.009  | 150.0913 | 118 | 70.5 | Cocaine                                             |
| 150.1003 | 149.07  | -0.0229 | 150.0774 | 195 | 71.2 | Adenine, N6-methyl                                  |
| 150.1003 | 167.095 | -0.009  | 150.0913 | 288 | 76.2 | Synephrine                                          |
| 150.1003 | 150.128 | 0.0274  | 150.1277 | 215 | 60.7 | N-Butyl-4-methylpyridinium                          |
| 205.1202 | 204.072 | -0.0408 | 205.0794 | 66  | 56.6 | Levamisole                                          |
| 205.1202 | 204.09  | -0.023  | 205.0972 | 119 | 77   | Fenozolone                                          |
| 205.1202 | 408.223 | -0.001  | 205.119  | 119 | 36.3 | Pro-His-Arg                                         |
| 205.1202 | 204.072 | -0.0408 | 205.0794 | 145 | 35.1 | Levamisole                                          |
| 276.1945 | 275.159 | -0.0279 | 276.1666 | 100 | 40.5 | Thr-Arg                                             |
| 276.1945 | 275.152 | -0.0351 | 276.1594 | 186 | 79.8 | Methylenedioxypropylvalerone                        |
| 276.1945 | 275.152 | -0.0351 | 276.1594 | 122 | 80.9 | Methylenedioxypropylvalerone                        |
| 276.1945 | 275.152 | -0.0351 | 276.1594 | 229 | 92.7 | Methylenedioxypropylvalerone                        |
| 205.1202 | 204.075 | -0.0383 | 205.0819 | 114 | 100  | Gly-Glu                                             |
| 205.1202 | 204.09  | -0.023  | 205.0972 | 151 | 38.2 | Fenozolone                                          |
| 205.1202 | 204.09  | -0.023  | 205.0972 | 191 | 35.6 | Ethotoin                                            |
| 150.1003 | 149.07  | -0.0229 | 150.0774 | 50  | 43.9 | Adenine, N6-methyl                                  |
| 150.1003 | 149.07  | -0.0229 | 150.0774 | 85  | 45.3 | Adenine, N6-methyl                                  |
| 150.1003 | 150.128 | 0.0274  | 150.1277 | 236 | 73.8 | N-Butyl-4-methylpyridinium                          |
| 150.1003 | 149.07  | -0.0229 | 150.0774 | 72  | 66   | Adenine, N6-methyl                                  |
| 163.1358 | 162.116 | -0.013  | 163.123  | 18  | 21   | Anabasine                                           |
| 163.1358 | 162.116 | -0.013  | 163.123  | 13  | 100  | Nicotine                                            |
| 163.1358 | 162.126 | -0.0029 | 163.1329 | 274 | 94.1 | Ethanol, 2-(2-butoxyethoxy)-                        |
| 163.1358 | 162.116 | -0.013  | 163.123  | 247 | 68.8 | Nicotine                                            |
| 515.4017 | 514.406 | 0.0112  | 515.4129 | 192 | 100  | Propanoic acid, 3,3'-thiobis-, didodecyl ester      |
| 515.4017 | 514.406 | 0.0112  | 515.4129 | 279 | 100  | Propanoic acid, 3,3'-thiobis-, didodecyl ester      |
| 515.4017 | 514.406 | 0.0112  | 515.4129 | 284 | 100  | Propanoic acid, 3,3'-thiobis-, didodecyl ester      |
| 425.2912 | 426.295 | -0.003  | 425.2882 | 77  | 38.7 | Leupeptin                                           |
| 425.2912 | 424.255 | -0.0293 | 425.2619 | 134 | 51   | His-Ile-Arg                                         |
| 303.2336 | 320.235 | -0.0017 | 303.2319 | 51  | 16.3 | 15(S)-Hydroxy-(5Z,8Z,11Z,13E)-eicosatetraenoic acid |
| 303.2336 | 320.235 | -0.0017 | 303.2319 | 121 | 43.9 | 15(S)-Hydroxy-(5Z,8Z,11Z,13E)-eicosatetraenoic acid |
| 303.2336 | 302.225 | -0.0017 | 303.2319 | 206 | 34.4 | 17.alpha.-Methyltestosterone                        |
| 303.2336 | 320.235 | -0.0017 | 303.2319 | 356 | 66.3 | 15(S)-Hydroxy-(5Z,8Z,11Z,13E)-eicosatetraenoic acid |
| 211.1671 | 0       | -0.04   | 211.13   | 238 | 45.2 | Jasmonic acid                                       |
| 211.1671 | 210.126 | -0.0342 | 211.1329 | 279 | 66.9 | Jasmonic Acid                                       |
| 211.1671 | 210.126 | -0.0342 | 211.1329 | 470 | 74.7 | Jasmonic Acid                                       |

|          |         |         |          |     |      |                                                    |
|----------|---------|---------|----------|-----|------|----------------------------------------------------|
| 211.1671 | 210.126 | -0.0342 | 211.1329 | 408 | 60.3 | Jasmonic Acid                                      |
| 283.1685 | 260.148 | -0.0308 | 283.1377 | 108 | 29.9 | Lys-Asn                                            |
| 283.1685 | 282.179 | 0.0179  | 283.1864 | 61  | 33   | 1,3-Bis(tris(hydroxymethyl)methylamino)propane     |
| 283.1685 | 0       | -0.02   | 283.15   | 145 | 54.9 | Artemisinin                                        |
| 283.1685 | 0       | -0.02   | 283.15   | 149 | 58.9 | Artemisinin                                        |
| 283.1685 | 0       | -0.02   | 283.15   | 103 | 49.8 | Artemisinin                                        |
| 283.1685 | 282.122 | -0.0396 | 283.1289 | 14  | 54.2 | Tyr-Thr                                            |
| 283.1685 | 282.179 | 0.0179  | 283.1864 | 74  | 61.1 | 1,3-Bis(tris(hydroxymethyl)methylamino)propane     |
| 283.1685 | 0       | -0.02   | 283.15   | 150 | 72.5 | Artemisinin                                        |
| 115.0768 | 114.025 | -0.0444 | 115.0324 | 3   | 100  | Methimazole                                        |
| 211.1441 | 210.1   | -0.0364 | 211.1077 | 234 | 77.9 | Aprobarbital                                       |
| 211.1441 | 0       | -0.01   | 211.13   | 232 | 36.5 | Jasmonic acid                                      |
| 211.1441 | 210.126 | -0.0112 | 211.1329 | 266 | 69.1 | Jasmonic Acid                                      |
| 211.1441 | 420.249 | -0.0126 | 211.1315 | 228 | 33.9 | Phe-Val-Arg                                        |
| 211.1441 | 210.126 | -0.0112 | 211.1329 | 195 | 42.8 | Jasmonic Acid                                      |
| 211.1441 | 228.147 | 0       | 211.1441 | 308 | 78.2 | Ile-Pro                                            |
| 211.1441 | 420.249 | -0.0126 | 211.1315 | 267 | 38.5 | Phe-Val-Arg                                        |
| 211.1441 | 420.249 | -0.0126 | 211.1315 | 266 | 67.4 | Phe-Val-Arg                                        |
| 211.1441 | 420.179 | -0.0473 | 211.0968 | 244 | 59.8 | Met-Asp-Arg                                        |
| 211.1441 | 228.147 | 0       | 211.1441 | 268 | 67.7 | Ile-Pro                                            |
| 211.1441 | 210.1   | -0.0364 | 211.1077 | 244 | 44   | Aprobarbital                                       |
| 211.1441 | 420.179 | -0.0473 | 211.0968 | 201 | 48.8 | Met-Asp-Arg                                        |
| 532.3931 | 509.385 | -0.0194 | 532.3737 | 43  | 100  | Lyso-PAF C-18                                      |
| 532.3931 | 514.318 | -0.0417 | 532.3514 | 297 | 100  | 3,6,9,12,15-Pentaoxonacosan-1-ol, hydrogen sulfate |
| 532.3931 | 514.318 | -0.0417 | 532.3514 | 289 | 100  | 3,6,9,12,15-Pentaoxonacosan-1-ol, hydrogen sulfate |
| 532.3931 | 514.318 | -0.0417 | 532.3514 | 190 | 100  | 3,6,9,12,15-Pentaoxonacosan-1-ol, hydrogen sulfate |
| 532.3856 | 509.385 | -0.0119 | 532.3737 | 50  | 100  | Lyso-PAF C-18                                      |
| 532.3856 | 514.318 | -0.0342 | 532.3514 | 275 | 100  | 3,6,9,12,15-Pentaoxonacosan-1-ol, hydrogen sulfate |
| 532.3856 | 514.318 | -0.0342 | 532.3514 | 343 | 100  | 3,6,9,12,15-Pentaoxonacosan-1-ol, hydrogen sulfate |
| 532.3856 | 514.318 | -0.0342 | 532.3514 | 128 | 100  | 3,6,9,12,15-Pentaoxonacosan-1-ol, hydrogen sulfate |
| 283.1685 | 260.148 | -0.0308 | 283.1377 | 174 | 63.6 | Lys-Asn                                            |

|          |         |         |          |     |      |                               |
|----------|---------|---------|----------|-----|------|-------------------------------|
| 283.1685 | 300.173 | 0.0008  | 283.1693 | 107 | 41.3 | 2-Methoxyestrone              |
| 283.1685 | 282.122 | -0.0396 | 283.1289 | 147 | 64.5 | Tyr-Thr                       |
| 283.1685 | 0       | -0.02   | 283.15   | 103 | 71   | Artemisinin                   |
| 211.1813 | 210.159 | -0.0147 | 211.1666 | 18  | 100  | Altretamine                   |
| 211.1813 | 420.249 | -0.0498 | 211.1315 | 268 | 56.1 | Phe-Val-Arg                   |
| 211.1813 | 0       | -0.05   | 211.13   | 257 | 34.4 | Jasmonic acid                 |
| 211.1813 | 210.126 | -0.0484 | 211.1329 | 89  | 43.9 | Jasmonic Acid                 |
| 276.2063 | 275.159 | -0.0397 | 276.1666 | 105 | 47.1 | Thr-Arg                       |
| 276.2063 | 275.152 | -0.0469 | 276.1594 | 173 | 38.4 | Homatropine                   |
| 276.2063 | 275.159 | -0.0397 | 276.1666 | 106 | 44.3 | Arg-Thr                       |
| 276.2063 | 275.152 | -0.0469 | 276.1594 | 185 | 75.5 | Methylenedioxypropylvalerone  |
| 163.0993 | 164.068 | -0.0381 | 163.0612 | 288 | 68.5 | L-(+)-Rhamnose                |
| 163.0993 | 179.095 | -0.0239 | 163.0754 | 295 | 79.4 | 3,4-Methylenedioxyamphetamine |
| 163.0993 | 179.095 | -0.0239 | 163.0754 | 338 | 37.3 | 3,4-Methylenedioxyamphetamine |
| 163.0993 | 179.095 | -0.0239 | 163.0754 | 343 | 82.7 | 3,4-Methylenedioxyamphetamine |
| 211.1113 | 0       | 0.02    | 211.13   | 182 | 52   | Jasmonic acid                 |
| 211.1113 | 210.126 | 0.0216  | 211.1329 | 236 | 21.8 | Jasmonic Acid                 |
| 211.1113 | 210.126 | 0.0216  | 211.1329 | 268 | 54   | Jasmonic Acid                 |
| 211.1113 | 210.1   | -0.0036 | 211.1077 | 145 | 45.6 | Aprobarbital                  |
| 211.1113 | 0       | 0.02    | 211.13   | 115 | 30.8 | Jasmonic acid                 |
| 211.1113 | 210.1   | -0.0036 | 211.1077 | 206 | 35.7 | Aprobarbital                  |
| 211.1113 | 210.1   | -0.0036 | 211.1077 | 245 | 23   | Aprobarbital                  |
| 211.1113 | 420.249 | 0.0202  | 211.1315 | 188 | 37.6 | Phe-Val-Arg                   |
| 283.1823 | 300.209 | 0.0233  | 283.2056 | 130 | 46   | 9-cis-Retinoic acid           |
| 283.1823 | 282.181 | 0.0061  | 283.1884 | 278 | 71.3 | Doxepin-D3                    |
| 283.1823 | 300.173 | -0.013  | 283.1693 | 222 | 56   | 2-Methoxyestrone              |
| 283.1823 | 0       | -0.03   | 283.15   | 235 | 72.3 | Artemisinin                   |
| 211.132  | 188.116 | -0.0267 | 211.1053 | 21  | 40.2 | Ile-Gly                       |
| 211.132  | 0       | 0       | 211.13   | 227 | 43   | Jasmonic acid                 |
| 211.132  | 228.147 | 0.0121  | 211.1441 | 279 | 38.2 | Ile-Pro                       |
| 211.132  | 0       | -0.03   | 211.1    | 243 | 38.6 | Sinapyl alcohol               |
| 150.0885 | 167.095 | 0.0028  | 150.0913 | 153 | 71.3 | Synephrine                    |
| 150.0885 | 167.095 | 0.0028  | 150.0913 | 372 | 65.5 | Synephrine                    |
| 150.0885 | 149.07  | -0.0111 | 150.0774 | 272 | 82.1 | Adenine, N6-methyl            |
| 150.0885 | 149.12  | 0.0392  | 150.1277 | 345 | 53.8 | Methamphetamine               |
| 205.1202 | 204.075 | -0.0383 | 205.0819 | 192 | 36   | Gly-Glu                       |
| 205.1202 | 204.075 | -0.0383 | 205.0819 | 181 | 42.6 | alpha.-L-Glu-Gly              |
| 205.1202 | 204.072 | -0.0408 | 205.0794 | 228 | 22.3 | Tetramisole                   |
| 205.1202 | 204.09  | -0.023  | 205.0972 | 259 | 20   | L-Tryptophan                  |
| 205.1202 | 204.075 | -0.0383 | 205.0819 | 142 | 33.6 | alpha.-L-Glu-Gly              |
| 205.1202 | 204.072 | -0.0408 | 205.0794 | 207 | 19.2 | Levamisole                    |
| 205.1202 | 0       | -0.04   | 205.08   | 258 | 28.4 | gamma-D-Glutamylglycine       |
| 205.1202 | 408.237 | 0.0057  | 205.1259 | 335 | 81.2 | Tyr-Val-Lys                   |
| 205.1202 | 408.161 | -0.0323 | 205.0879 | 128 | 44   | Cys-Met-Arg                   |

|          |         |         |          |     |      |                                                             |
|----------|---------|---------|----------|-----|------|-------------------------------------------------------------|
| 205.1202 | 0       | -0.04   | 205.08   | 260 | 49.7 | gamma-D-Glutamylglycine                                     |
| 205.1202 | 204.09  | -0.023  | 205.0972 | 221 | 29.3 | L-Tryptophan                                                |
| 205.1202 | 408.237 | 0.0057  | 205.1259 | 232 | 21.4 | Tyr-Val-Lys                                                 |
| 115.0571 | 0       | -0.03   | 115.03   | 189 | 62.9 | Methimazole                                                 |
| 211.1548 | 210.126 | -0.0219 | 211.1329 | 243 | 69.8 | Jasmonic Acid                                               |
| 211.1548 | 210.126 | -0.0219 | 211.1329 | 266 | 44.8 | Jasmonic Acid                                               |
| 211.1548 | 210.126 | -0.0219 | 211.1329 | 236 | 33.5 | Jasmonic Acid                                               |
| 211.1548 | 420.249 | -0.0233 | 211.1315 | 256 | 25.6 | Phe-Val-Arg                                                 |
| 205.1202 | 0       | -0.04   | 205.08   | 116 | 18.4 | gamma-D-Glutamylglycine                                     |
| 205.1202 | 204.1   | -0.013  | 205.107  | 262 | 45   | 1,6-Anhydro-b-D-glucose, permethyl-                         |
| 205.1202 | 408.237 | 0.0057  | 205.1259 | 255 | 24   | Tyr-Val-Lys                                                 |
| 205.1202 | 204.1   | -0.013  | 205.107  | 200 | 19.5 | 1,6-Anhydro-b-D-glucose, permethyl-                         |
| 211.1548 | 210.126 | -0.0219 | 211.1329 | 182 | 31.1 | Jasmonic Acid                                               |
| 211.1548 | 0       | -0.02   | 211.13   | 250 | 71.6 | Jasmonic acid                                               |
| 211.1548 | 210.1   | -0.0471 | 211.1077 | 256 | 38.7 | Aprobarbital                                                |
| 211.1548 | 210.1   | -0.0471 | 211.1077 | 268 | 48.6 | Aprobarbital                                                |
| 115.0571 | 114.025 | -0.0247 | 115.0324 | 50  | 32   | Methimazole                                                 |
| 115.0571 | 0       | -0.01   | 115.05   | 196 | 50.1 | Dihydrouracil                                               |
| 115.0571 | 0       | -0.03   | 115.03   | 8   | 36.1 | Methimazole                                                 |
| 115.0571 | 114.043 | -0.0069 | 115.0502 | 17  | 100  | Dihydrouracil                                               |
| 115.0571 | 132.042 | -0.018  | 115.039  | 86  | 55.1 | Glutaric acid                                               |
| 176.0975 | 193.058 | -0.0428 | 176.0547 | 99  | 73.7 | S-(2-Boronoethyl)-L-cysteine                                |
| 176.0975 | 175     | -0.03   | 176.07   | 152 | 76.5 | 1-Methoxy-3-carbaldehyde                                    |
| 176.0975 | 175.063 | -0.0269 | 176.0706 | 238 | 55.4 | 3-Indoleacetic acid                                         |
| 258.1677 | 0       | -0.05   | 258.12   | 195 | 76.3 | 4'-(DIMETHYLAMINO)AZOXY BENZENE N-OXIDE                     |
| 258.1677 | 0       | -0.05   | 258.12   | 162 | 81.2 | 4'-(DIMETHYLAMINO)AZOXY BENZENE N-OXIDE                     |
| 258.1677 | 0       | 0.02    | 258.19   | 81  | 100  | Dextrorphan                                                 |
| 258.1677 | 0       | 0.02    | 258.19   | 265 | 74.9 | Dextrorphan                                                 |
| 343.2033 | 342.215 | 0.0194  | 343.2227 | 29  | 100  | Loxistatin                                                  |
| 343.2033 | 344.235 | 0.0246  | 343.2279 | 168 | 67.7 | (+/-)-10-hydroxy-4Z,7Z,11E,13Z,16Z,19Z-docosahexaenoic acid |
| 343.2033 | 342.215 | 0.0194  | 343.2227 | 136 | 82.8 | Loxistatin                                                  |
| 343.2033 | 342.227 | 0.031   | 343.234  | 139 | 66.8 | Val-Pro-Lys                                                 |
| 266.1481 | 265.168 | 0.027   | 266.1751 | 41  | 100  | Oxprenolol                                                  |
| 266.1481 | 265.095 | -0.0458 | 266.1023 | 181 | 83.7 | 3,4-Dihydroxycinnamic acid (L-alanine methyl ester) amide   |
| 266.1481 | 265.15  | 0.0092  | 266.1573 | 196 | 29.6 | Esprocarb                                                   |
| 266.1481 | 265.168 | 0.027   | 266.1751 | 44  | 100  | Oxprenolol                                                  |

|          |         |         |          |     |      |                                          |
|----------|---------|---------|----------|-----|------|------------------------------------------|
| 283.1685 | 300.173 | 0.0008  | 283.1693 | 95  | 62.5 | 2-Methoxyestrone                         |
| 283.1685 | 0       | -0.02   | 283.15   | 223 | 43   | Artemisinin                              |
| 283.1685 | 0       | -0.02   | 283.15   | 306 | 81.1 | Artemisinin                              |
| 283.1685 | 0       | -0.02   | 283.15   | 313 | 90.3 | Artemisinin                              |
| 176.0975 | 175.084 | -0.0058 | 176.0917 | 97  | 79   | N-Carboxyethyl-.gamma.-aminobutyric acid |
| 176.0975 | 175     | -0.03   | 176.07   | 143 | 70.4 | 1-Methoxy-3-carbaldehyde                 |
| 150.1003 | 149.07  | -0.0229 | 150.0774 | 150 | 75.7 | Adenine, N6-methyl                       |
| 150.1003 | 149.07  | -0.0229 | 150.0774 | 294 | 84.7 | Adenine, N6-methyl                       |
| 150.1003 | 149.07  | -0.0229 | 150.0774 | 317 | 74.7 | Adenine, N6-methyl                       |
| 150.1003 | 167.095 | -0.009  | 150.0913 | 241 | 50.6 | Synephrine                               |
| 150.1003 | 149.084 | -0.009  | 150.0913 | 54  | 48.9 | S(-)-Cathinone                           |
| 150.1003 | 149.105 | 0.0122  | 150.1125 | 220 | 67.5 | Triethanolamine                          |
| 150.1003 | 167.095 | -0.009  | 150.0913 | 229 | 72.5 | Synephrine                               |
| 150.1003 | 149.07  | -0.0229 | 150.0774 | 310 | 56.8 | Adenine, N6-methyl                       |
| 211.1441 | 188.116 | -0.0388 | 211.1053 | 93  | 68.4 | Ile-Gly                                  |
| 211.1441 | 210.126 | -0.0112 | 211.1329 | 140 | 32.2 | Jasmonic Acid                            |
| 211.1441 | 210.126 | -0.0112 | 211.1329 | 209 | 31.9 | Jasmonic Acid                            |
| 211.1441 | 210.1   | -0.0364 | 211.1077 | 288 | 79.5 | Aprobarbital                             |
| 276.1945 | 275.159 | -0.0279 | 276.1666 | 114 | 51.4 | Thr-Arg                                  |
| 276.1945 | 319.133 | -0.0438 | 276.1507 | 61  | 60.8 | Norfloxacin                              |
| 276.1945 | 319.133 | -0.0438 | 276.1507 | 137 | 69.9 | Norfloxacin                              |
| 276.1945 | 275.152 | -0.0351 | 276.1594 | 200 | 48   | Homatropine                              |
| 276.1945 | 275.148 | -0.0391 | 276.1554 | 104 | 20.5 | Glu-Lys                                  |
| 276.1945 | 275.152 | -0.0351 | 276.1594 | 145 | 34.7 | 4-Hydroxypropranolol                     |
| 276.1945 | 319.133 | -0.0438 | 276.1507 | 105 | 53.5 | Norfloxacin                              |
| 276.1945 | 275.152 | -0.0351 | 276.1594 | 136 | 66.1 | Homatropine                              |
| 276.1945 | 275.159 | -0.0279 | 276.1666 | 174 | 39.5 | Thr-Arg                                  |
| 276.1945 | 275.152 | -0.0351 | 276.1594 | 129 | 47.1 | Methylenedioxyprovalerone                |
| 276.1945 | 275.159 | -0.0279 | 276.1666 | 179 | 21.1 | Thr-Arg                                  |
| 276.1945 | 319.133 | -0.0438 | 276.1507 | 202 | 45.1 | Norfloxacin                              |
| 150.0885 | 167.095 | 0.0028  | 150.0913 | 182 | 60   | Synephrine                               |
| 150.0885 | 149.07  | -0.0111 | 150.0774 | 337 | 96.3 | Adenine, N6-methyl                       |
| 150.0885 | 149.07  | -0.0111 | 150.0774 | 307 | 87.6 | Adenine, N6-methyl                       |
| 150.0885 | 167.095 | 0.0028  | 150.0913 | 316 | 82.8 | Synephrine                               |
| 115.0709 | 0       | -0.02   | 115.05   | 126 | 43.7 | 3-Cyano-L-alanine                        |
| 115.0709 | 132.053 | -0.0207 | 115.0502 | 11  | 100  | 3-Ureidopropionic acid                   |
| 211.1441 | 210.126 | -0.0112 | 211.1329 | 87  | 29.6 | Jasmonic Acid                            |
| 211.1441 | 210.126 | -0.0112 | 211.1329 | 71  | 15.5 | Jasmonic Acid                            |
| 211.1441 | 210.126 | -0.0112 | 211.1329 | 232 | 40.6 | Jasmonic Acid                            |
| 211.1441 | 0       | -0.01   | 211.13   | 264 | 42.3 | Jasmonic acid                            |
| 211.1113 | 188.116 | -0.006  | 211.1053 | 77  | 26.8 | Ile-Gly                                  |
| 211.1113 | 210.126 | 0.0216  | 211.1329 | 192 | 28.2 | Jasmonic Acid                            |
| 211.1113 | 210.1   | -0.0036 | 211.1077 | 260 | 62.5 | Aprobarbital                             |
| 211.1113 | 210.1   | -0.0036 | 211.1077 | 207 | 43.4 | Aprobarbital                             |
| 115.0692 | 0       | -0.02   | 115.05   | 113 | 25.6 | Dihydrouracil                            |
| 115.0692 | 114.025 | -0.0368 | 115.0324 | 48  | 56.6 | Methimazole                              |

|          |         |         |          |     |      |                                                            |
|----------|---------|---------|----------|-----|------|------------------------------------------------------------|
| 276.1945 | 275.159 | -0.0279 | 276.1666 | 130 | 28.9 | Thr-Arg                                                    |
| 276.1945 | 275.159 | -0.0279 | 276.1666 | 144 | 22.2 | Arg-Thr                                                    |
| 276.1945 | 275.152 | -0.0351 | 276.1594 | 170 | 52.7 | Methylenedioxypropylvalerone                               |
| 276.1945 | 275.159 | -0.0279 | 276.1666 | 202 | 25.5 | Thr-Arg                                                    |
| 343.209  | 342.202 | -0.0002 | 343.2088 | 170 | 12.4 | Ala-Pro-Arg                                                |
| 343.209  | 342.215 | 0.0137  | 343.2227 | 190 | 55.9 | Loxistatin                                                 |
| 343.209  | 342.215 | 0.0137  | 343.2227 | 182 | 33.4 | Loxistatin                                                 |
| 343.209  | 342.215 | 0.0137  | 343.2227 | 231 | 49.8 | Loxistatin                                                 |
| 276.1945 | 275.159 | -0.0279 | 276.1666 | 214 | 58.7 | Thr-Arg                                                    |
| 276.1945 | 275.159 | -0.0279 | 276.1666 | 206 | 55.9 | Thr-Arg                                                    |
| 276.1945 | 319.133 | -0.0438 | 276.1507 | 157 | 37.2 | Norfloxacin                                                |
| 276.1945 | 275.152 | -0.0351 | 276.1594 | 185 | 43.2 | Homatropine                                                |
| 343.2127 | 344.235 | 0.0152  | 343.2279 | 189 | 78   | (+/-)-4-hydroxy-5E,7Z,10Z,13Z,16Z,19Z-docosahexaenoic acid |
| 343.2127 | 342.256 | 0.0505  | 343.2632 | 170 | 52.8 | Retinyl propionate                                         |
| 343.2127 | 171.126 | 0.0464  | 343.2591 | 251 | 54.4 | Gabapentin                                                 |
| 343.2127 | 171.126 | 0.0464  | 343.2591 | 236 | 47.7 | Gabapentin                                                 |
| 257.1363 | 256.117 | -0.0119 | 257.1244 | 176 | 25.3 | His-Thr                                                    |
| 257.1363 | 256.117 | -0.0119 | 257.1244 | 200 | 45   | Thr-His                                                    |
| 257.1363 | 256.117 | -0.0119 | 257.1244 | 301 | 28.7 | Thr-His                                                    |
| 257.1363 | 256.117 | -0.0119 | 257.1244 | 164 | 38.3 | Thr-His                                                    |
| 150.0787 | 149.07  | -0.0013 | 150.0774 | 145 | 41.4 | Adenine, N6-methyl                                         |
| 150.0787 | 149.07  | -0.0013 | 150.0774 | 351 | 97.5 | Adenine, N6-methyl                                         |
| 150.0787 | 167.095 | 0.0126  | 150.0913 | 363 | 82.6 | Synephrine                                                 |
| 150.0787 | 149.07  | -0.0013 | 150.0774 | 343 | 52.5 | Adenine, N6-methyl                                         |
| 150.1003 | 167.095 | -0.009  | 150.0913 | 229 | 72.7 | Synephrine                                                 |
| 150.1003 | 167.095 | -0.009  | 150.0913 | 303 | 55.9 | Synephrine                                                 |
| 150.1003 | 149.07  | -0.0229 | 150.0774 | 372 | 93   | Adenine, N6-methyl                                         |
| 150.1003 | 167.058 | -0.045  | 150.055  | 286 | 52.9 | 3-Methyl-2-nitrobenzyl alcohol                             |
| 150.0885 | 149.07  | -0.0111 | 150.0774 | 353 | 89.7 | Adenine, N6-methyl                                         |
| 150.0885 | 149.07  | -0.0111 | 150.0774 | 266 | 43.9 | Adenine, N6-methyl                                         |
| 150.0885 | 149.07  | -0.0111 | 150.0774 | 409 | 96.3 | Adenine, N6-methyl                                         |
| 150.0885 | 149.07  | -0.0111 | 150.0774 | 263 | 56   | Adenine, N6-methyl                                         |
| 150.1003 | 149.07  | -0.0229 | 150.0774 | 242 | 46   | Adenine, N6-methyl                                         |
| 150.1003 | 149.07  | -0.0229 | 150.0774 | 261 | 71.1 | Adenine, N6-methyl                                         |
| 150.1003 | 149.07  | -0.0229 | 150.0774 | 342 | 75.2 | Adenine, N6-methyl                                         |
| 150.1003 | 149.07  | -0.0229 | 150.0774 | 231 | 47.4 | Adenine, N6-methyl                                         |
| 225.1804 | 0       | -0.03   | 225.15   | 261 | 79.9 | Methyl jasmonate                                           |
| 225.1804 | 0       | -0.03   | 225.15   | 357 | 84.5 | Methyl jasmonate                                           |
| 225.1804 | 0       | -0.03   | 225.15   | 286 | 86.2 | Methyl jasmonate                                           |
| 225.1804 | 0       | -0.03   | 225.15   | 403 | 97.7 | Methyl jasmonate                                           |
| 211.1548 | 0       | -0.02   | 211.13   | 139 | 35.6 | Jasmonic acid                                              |
| 211.1548 | 210.126 | -0.0219 | 211.1329 | 280 | 45.6 | Jasmonic Acid                                              |
| 211.1548 | 210.126 | -0.0219 | 211.1329 | 255 | 34.7 | Jasmonic Acid                                              |
| 211.1548 | 0       | -0.02   | 211.13   | 303 | 53.8 | Jasmonic acid                                              |

|          |         |         |          |     |      |                                                |
|----------|---------|---------|----------|-----|------|------------------------------------------------|
| 150.1003 | 149.07  | -0.0229 | 150.0774 | 292 | 87.2 | Adenine, N6-methyl                             |
| 150.1003 | 149.07  | -0.0229 | 150.0774 | 292 | 92.3 | Adenine, N6-methyl                             |
| 150.1003 | 149.07  | -0.0229 | 150.0774 | 266 | 55.6 | Adenine, N6-methyl                             |
| 150.1003 | 149.07  | -0.0229 | 150.0774 | 254 | 67.7 | Adenine, N6-methyl                             |
| 205.1202 | 204.075 | -0.0383 | 205.0819 | 169 | 97.4 | Gly-Glu                                        |
| 205.1202 | 204.1   | -0.013  | 205.107  | 189 | 44.3 | 1,6-Anhydro-b-D-glucose, permethyl-            |
| 205.1202 | 204.072 | -0.0408 | 205.0794 | 299 | 54.4 | Tetramisole                                    |
| 205.1202 | 204.072 | -0.0408 | 205.0794 | 251 | 26.3 | Levamisole                                     |
| 137.0462 | 136.039 | -0.0004 | 137.0458 | 26  | 8.8  | Allopurinol                                    |
| 137.0462 | 136.039 | -0.0004 | 137.0458 | 314 | 81.8 | Hypoxanthine                                   |
| 137.0462 | 136.039 | -0.0004 | 137.0458 | 91  | 13.6 | Hypoxanthine                                   |
| 137.0462 | 154.063 | 0.0135  | 137.0597 | 134 | 24.6 | 2-Hydroxy-3-methoxybenzyl alcohol              |
| 205.1202 | 204.072 | -0.0408 | 205.0794 | 196 | 60.3 | Tetramisole                                    |
| 205.1202 | 204.1   | -0.013  | 205.107  | 251 | 54.9 | 1,6-Anhydro-b-D-glucose, permethyl-            |
| 205.1202 | 204.072 | -0.0408 | 205.0794 | 185 | 36.5 | Levamisole                                     |
| 205.1202 | 204.072 | -0.0408 | 205.0794 | 357 | 53.9 | Levamisole                                     |
| 150.0885 | 149     | -0.01   | 150.08   | 135 | 41.8 | 3-Methyladenine                                |
| 150.0885 | 149.07  | -0.0111 | 150.0774 | 408 | 96.2 | Adenine, N6-methyl                             |
| 150.0885 | 149.07  | -0.0111 | 150.0774 | 378 | 81.4 | Adenine, N6-methyl                             |
| 150.0885 | 167.095 | 0.0028  | 150.0913 | 295 | 81   | Synephrine                                     |
| 137.0462 | 154.027 | -0.0229 | 137.0233 | 2   | 100  | .beta.-Resorcylic acid                         |
| 137.0462 | 154.027 | -0.0229 | 137.0233 | 114 | 18.3 | Benzoic acid, 2,3-dihydroxy-                   |
| 137.0462 | 136.039 | -0.0004 | 137.0458 | 20  | 8.3  | Hypoxanthine                                   |
| 137.0462 | 136.039 | -0.0004 | 137.0458 | 58  | 20.6 | Hypoxanthine                                   |
| 283.1685 | 282.179 | 0.0179  | 283.1864 | 101 | 66   | 1,3-Bis(tris(hydroxymethyl)methylamino)propane |
| 283.1685 | 0       | -0.02   | 283.15   | 219 | 68   | Artemisinin                                    |
| 283.1685 | 282.122 | -0.0396 | 283.1289 | 241 | 28.1 | Thr-Tyr                                        |
| 283.1685 | 282.179 | 0.0179  | 283.1864 | 276 | 64.3 | 1,3-Bis(tris(hydroxymethyl)methylamino)propane |
| 205.1202 | 204.075 | -0.0383 | 205.0819 | 178 | 51.4 | Gly-Glu                                        |
| 205.1202 | 408.161 | -0.0323 | 205.0879 | 173 | 22.4 | Cys-Met-Arg                                    |
| 205.1202 | 204.072 | -0.0408 | 205.0794 | 201 | 21.3 | Levamisole                                     |
| 205.1202 | 204.072 | -0.0408 | 205.0794 | 356 | 69.3 | Tetramisole                                    |
| 150.1003 | 167.095 | -0.009  | 150.0913 | 264 | 93.6 | Synephrine                                     |
| 150.1003 | 149.07  | -0.0229 | 150.0774 | 321 | 73.5 | Adenine, N6-methyl                             |
| 150.1003 | 149.07  | -0.0229 | 150.0774 | 387 | 94.8 | Adenine, N6-methyl                             |
| 150.1003 | 167.095 | -0.009  | 150.0913 | 265 | 56   | Synephrine                                     |
| 276.1945 | 275.159 | -0.0279 | 276.1666 | 199 | 70.5 | Arg-Thr                                        |
| 276.1945 | 275.159 | -0.0279 | 276.1666 | 133 | 24.9 | Thr-Arg                                        |
| 276.1945 | 275.152 | -0.0351 | 276.1594 | 207 | 90.8 | Methylenedioxyprovalerone                      |
| 276.1945 | 275.152 | -0.0351 | 276.1594 | 276 | 78.4 | Methylenedioxyprovalerone                      |



|          |         |         |          |     |      |                                     |
|----------|---------|---------|----------|-----|------|-------------------------------------|
| 276.2063 | 275.159 | -0.0397 | 276.1666 | 235 | 70.1 | Arg-Thr                             |
| 276.2063 | 275.159 | -0.0397 | 276.1666 | 219 | 78.4 | Arg-Thr                             |
| 276.2063 | 275.152 | -0.0469 | 276.1594 | 152 | 80.4 | Methylenedioxypropylvalerone        |
| 276.2063 | 275.152 | -0.0469 | 276.1594 | 255 | 74.9 | Homatropine                         |
| 211.1247 | 188.116 | -0.0194 | 211.1053 | 18  | 16.6 | Ile-Gly                             |
| 211.1247 | 420.223 | -0.006  | 211.119  | 36  | 11.8 | His-His-Lys                         |
| 211.1247 | 210.126 | 0.0082  | 211.1329 | 94  | 20.7 | Jasmonic Acid                       |
| 211.1247 | 210.126 | 0.0082  | 211.1329 | 152 | 28.6 | Jasmonic Acid                       |
| 211.1247 | 0       | 0.01    | 211.13   | 40  | 16.3 | Jasmonic acid                       |
| 211.1247 | 0       | 0.01    | 211.13   | 92  | 44   | Jasmonic acid                       |
| 211.1247 | 0       | -0.04   | 211.08   | 96  | 17.4 | D-Glucoheptose                      |
| 211.1247 | 420.249 | 0.0068  | 211.1315 | 75  | 14.4 | Phe-Val-Arg                         |
| 211.128  | 210.126 | 0.0049  | 211.1329 | 37  | 11.4 | Jasmonic Acid                       |
| 211.128  | 0       | 0       | 211.13   | 138 | 17.1 | Jasmonic acid                       |
| 211.128  | 210.126 | 0.0049  | 211.1329 | 99  | 17.1 | Jasmonic Acid                       |
| 211.128  | 0       | 0       | 211.13   | 146 | 44.4 | Jasmonic acid                       |
| 163.1098 | 162     | 0       | 163.11   | 171 | 47.4 | DL-5-Hydroxylysine<br>hydrochloride |
| 163.1098 | 162.1   | -0.0021 | 163.1077 | 248 | 52.8 | DL-Lysine, 5-hydroxy-               |
| 163.1098 | 162     | 0       | 163.11   | 275 | 33.5 | DL-5-Hydroxylysine<br>hydrochloride |
| 163.1098 | 162.116 | 0.013   | 163.123  | 319 | 60.7 | Anabasine                           |
| 133.097  | 150.079 | -0.021  | 133.076  | 10  | 50   | 3-Methylbenzamide oxime             |
| 133.097  | 150.068 | -0.032  | 133.0648 | 236 | 68.1 | (2S,3S)-(-)-3-Phenylglycidol        |
| 133.097  | 150.068 | -0.032  | 133.0648 | 320 | 73.2 | (2S,3S)-(-)-3-Phenylglycidol        |
| 133.097  | 150.068 | -0.032  | 133.0648 | 253 | 41.2 | (2S,3S)-(-)-3-Phenylglycidol        |
| 276.2157 | 0       | -0.05   | 276.17   | 82  | 67.3 | cyclobenzaprine                     |
| 205.1375 | 188.116 | -0.0181 | 205.1194 | 172 | 73.5 | Glycyl-L-norleucine                 |
| 205.1375 | 408.223 | -0.018  | 205.119  | 185 | 44.2 | Pro-His-Arg                         |
| 205.1375 | 408.237 | -0.0116 | 205.1259 | 158 | 62.8 | Tyr-Val-Lys                         |
| 205.1375 | 408.212 | -0.0242 | 205.1133 | 344 | 58.2 | Phe-Ser-Arg                         |
| 276.2157 | 258.183 | 0.0012  | 276.2169 | 55  | 100  | Tetradecanedioic acid               |
| 276.2157 | 258.183 | 0.0012  | 276.2169 | 77  | 83.8 | Tetradecanedioic acid               |
| 276.2157 | 0       | -0.05   | 276.17   | 85  | 100  | cyclobenzaprine                     |
| 276.2157 | 0       | -0.05   | 276.17   | 128 | 87.1 | cyclobenzaprine                     |
| 176.1125 | 175.096 | -0.009  | 176.103  | 43  | 100  | L-Citrulline                        |
| 176.1125 | 175     | -0.04   | 176.07   | 167 | 73.6 | 1-Methoxy-3-carbaldehyde            |
| 163.1098 | 162.064 | -0.0385 | 163.0713 | 103 | 48.3 | Gly-Ser                             |
| 163.1098 | 179.095 | -0.0344 | 163.0754 | 148 | 32.1 | 3,4-<br>Methylenedioxyamphetamine   |
| 163.1098 | 162     | 0       | 163.11   | 254 | 43.6 | DL-5-Hydroxylysine<br>hydrochloride |
| 163.1098 | 162.116 | 0.013   | 163.123  | 231 | 60   | Anabasine                           |
| 149.0962 | 148.074 | -0.0154 | 149.0808 | 279 | 76.8 | Mevalonic acid                      |
| 149.0962 | 165.115 | -0.0001 | 149.0961 | 347 | 99   | (+/-)-p-Methoxyamphetamine          |

|          |         |         |          |     |      |                                                |
|----------|---------|---------|----------|-----|------|------------------------------------------------|
| 149.0962 | 165.115 | -0.0001 | 149.0961 | 343 | 91.5 | (+/-)-p-Methoxyamphetamine                     |
| 149.0962 | 165.115 | -0.0001 | 149.0961 | 306 | 69.7 | (+/-)-p-Methoxyamphetamine                     |
| 205.1375 | 188.116 | -0.0181 | 205.1194 | 132 | 60.6 | Glycyl-L-norleucine                            |
| 205.1375 | 188.116 | -0.0181 | 205.1194 | 114 | 21.1 | Glycyl-L-norleucine                            |
| 205.1375 | 408.161 | -0.0496 | 205.0879 | 127 | 30.5 | Cys-Met-Arg                                    |
| 205.1375 | 204.09  | -0.0403 | 205.0972 | 267 | 30.7 | Fenozolone                                     |
| 205.1375 | 188.116 | -0.0181 | 205.1194 | 163 | 94.1 | Glycyl-L-norleucine                            |
| 205.1375 | 188.116 | -0.0181 | 205.1194 | 126 | 20.9 | Glycyl-L-norleucine                            |
| 205.1375 | 408.223 | -0.018  | 205.119  | 303 | 65.8 | Pro-His-Arg                                    |
| 205.1375 | 408.237 | -0.0116 | 205.1259 | 325 | 44.9 | Tyr-Val-Lys                                    |
| 163.1064 | 179.095 | -0.031  | 163.0754 | 140 | 74.8 | 3,4-Methylenedioxyamphetamine                  |
| 163.1064 | 162.126 | 0.0264  | 163.1329 | 211 | 67   | Ethanol, 2-(2-butoxyethoxy)-                   |
| 163.1064 | 164.068 | -0.0452 | 163.0612 | 222 | 44.6 | L-(+)-Rhamnose                                 |
| 163.1064 | 162.116 | 0.017   | 163.123  | 241 | 38   | Anabasine                                      |
| 163.1098 | 179.095 | -0.0344 | 163.0754 | 97  | 22.9 | 3,4-Methylenedioxyamphetamine                  |
| 163.1098 | 162.1   | -0.0021 | 163.1077 | 131 | 33.8 | DL-Lysine, 5-hydroxy-                          |
| 163.1098 | 162.116 | 0.013   | 163.123  | 302 | 63.5 | Anabasine                                      |
| 163.1098 | 162.1   | -0.0021 | 163.1077 | 282 | 69.2 | DL-Lysine, 5-hydroxy-                          |
| 327.2164 | 344.235 | 0.0155  | 327.2319 | 115 | 72   | Medroxyprogesterone                            |
| 327.2164 | 344.199 | -0.0209 | 327.1955 | 144 | 46.9 | Tetrahydrocannabinol(nor-delta-9-HOOC)         |
| 327.2164 | 344.199 | -0.0209 | 327.1955 | 170 | 35.5 | Tetrahydrocannabinol(nor-delta-9-HOOC)         |
| 283.1898 | 0       | -0.04   | 283.15   | 134 | 37.5 | Artemisinin                                    |
| 283.1898 | 300.173 | -0.0205 | 283.1693 | 147 | 39.9 | 2-Methoxyestrone                               |
| 283.1898 | 0       | -0.04   | 283.15   | 275 | 76.3 | Artemisinin                                    |
| 283.1898 | 0       | -0.04   | 283.15   | 239 | 49.2 | Artemisinin                                    |
| 283.1898 | 0       | -0.04   | 283.15   | 127 | 47.4 | Artemisinin                                    |
| 283.1898 | 282.179 | -0.0034 | 283.1864 | 182 | 48.1 | 1,3-Bis(tris(hydroxymethyl)methylamino)propane |
| 283.1898 | 0       | -0.04   | 283.15   | 222 | 68.3 | Artemisinin                                    |
| 283.1898 | 0       | -0.04   | 283.15   | 263 | 78.1 | Artemisinin                                    |
| 283.1898 | 0       | -0.04   | 283.15   | 111 | 42.7 | Artemisinin                                    |
| 283.1898 | 282.179 | -0.0034 | 283.1864 | 236 | 62.8 | 1,3-Bis(tris(hydroxymethyl)methylamino)propane |
| 283.1898 | 300.173 | -0.0205 | 283.1693 | 187 | 41   | 2-Methoxyestrone                               |
| 283.1898 | 300.173 | -0.0205 | 283.1693 | 218 | 49.2 | 2-Methoxyestrone                               |
| 257.1488 | 256.117 | -0.0244 | 257.1244 | 187 | 43   | Thr-His                                        |
| 257.1488 | 256.117 | -0.0244 | 257.1244 | 180 | 53.3 | Thr-His                                        |
| 257.1488 | 256.117 | -0.0244 | 257.1244 | 157 | 26.3 | Thr-His                                        |
| 257.1488 | 256.117 | -0.0244 | 257.1244 | 188 | 38.9 | His-Thr                                        |

|          |         |         |          |     |      |                                                |
|----------|---------|---------|----------|-----|------|------------------------------------------------|
| 205.1202 | 204.075 | -0.0383 | 205.0819 | 131 | 63.4 | Gly-Glu                                        |
| 205.1202 | 204.1   | -0.013  | 205.107  | 146 | 27.3 | 1,6-Anhydro-b-D-glucose, permethyl-            |
| 205.1202 | 204.072 | -0.0408 | 205.0794 | 340 | 74.8 | Levamisole                                     |
| 205.1202 | 408.223 | -0.001  | 205.119  | 206 | 20.7 | His-Pro-Arg                                    |
| 283.1854 | 0       | -0.04   | 283.15   | 102 | 43.1 | Artemisinin                                    |
| 283.1854 | 282.179 | 0.001   | 283.1864 | 224 | 91.1 | 1,3-Bis(tris(hydroxymethyl)methylamino)propane |
| 283.1854 | 282.179 | 0.001   | 283.1864 | 244 | 77.7 | 1,3-Bis(tris(hydroxymethyl)methylamino)propane |
| 283.1854 | 0       | -0.04   | 283.15   | 308 | 69.3 | Artemisinin                                    |
| 283.1898 | 0       | -0.04   | 283.15   | 122 | 44.3 | Artemisinin                                    |
| 283.1898 | 282.179 | -0.0034 | 283.1864 | 220 | 71.4 | 1,3-Bis(tris(hydroxymethyl)methylamino)propane |
| 283.1898 | 0       | -0.04   | 283.15   | 198 | 44.7 | Artemisinin                                    |
| 283.1898 | 0       | -0.04   | 283.15   | 264 | 75.4 | Artemisinin                                    |
| 343.3048 | 342.256 | -0.0416 | 343.2632 | 34  | 77.3 | Retinyl propionate                             |
| 343.3048 | 342.256 | -0.0416 | 343.2632 | 71  | 70   | Retinyl propionate                             |
| 327.2164 | 344.199 | -0.0209 | 327.1955 | 96  | 58   | Tetrahydrocannabinol(nor-delta-9-HOOC)         |
| 327.2164 | 326.199 | -0.0097 | 327.2067 | 224 | 51.8 | Ajmaline                                       |
| 327.2164 | 0       | -0.01   | 327.21   | 139 | 70.8 | Hydroquinidine                                 |
| 327.2164 | 326.192 | -0.0176 | 327.1988 | 75  | 60   | Dodecylbenzenesulfonic acid                    |
| 327.2164 | 0       | -0.01   | 327.21   | 172 | 59   | Ajmaline                                       |
| 327.2164 | 326.192 | -0.0176 | 327.1988 | 118 | 31.3 | Dodecylbenzenesulfonic acid                    |
| 176.1195 | 175     | -0.05   | 176.07   | 128 | 48.8 | 1-Methoxy-3-carbaldehyde                       |
| 176.1195 | 175     | -0.05   | 176.07   | 122 | 45.8 | 1-Methoxy-3-carbaldehyde                       |
| 176.1195 | 175     | -0.05   | 176.07   | 121 | 70.2 | 1-Methoxy-3-carbaldehyde                       |
| 169.1192 | 168.115 | 0.0031  | 169.1223 | 166 | 81.1 | Jasmine lactone                                |
| 169.1192 | 168.115 | 0.0031  | 169.1223 | 228 | 84.8 | Jasmine lactone                                |
| 169.1192 | 168.115 | 0.0031  | 169.1223 | 228 | 88.9 | Jasmine lactone                                |
| 169.1192 | 168.09  | -0.022  | 169.0972 | 308 | 55.4 | Pyridoxamine                                   |
| 169.1215 | 336.147 | -0.0409 | 169.0806 | 159 | 45.2 | Ser-Cys-Lys                                    |
| 169.1215 | 336.147 | -0.0409 | 169.0806 | 250 | 65   | Ser-Cys-Lys                                    |
| 169.1215 | 168.115 | 0.0008  | 169.1223 | 209 | 69.9 | Jasmine lactone                                |
| 169.1215 | 168.09  | -0.0243 | 169.0972 | 170 | 42.4 | Pyridoxamine                                   |
| 163.1028 | 162.064 | -0.0315 | 163.0713 | 83  | 41.7 | Gly-Ser                                        |
| 163.1028 | 162.126 | 0.0301  | 163.1329 | 215 | 46.6 | Ethanol, 2-(2-butoxyethoxy)-                   |
| 163.1028 | 162.116 | 0.02    | 163.123  | 345 | 80   | Anabasine                                      |
| 163.1028 | 162.116 | 0.02    | 163.123  | 474 | 90.9 | Anabasine                                      |
| 276.1945 | 275.159 | -0.0279 | 276.1666 | 171 | 39.1 | Arg-Thr                                        |
| 276.1945 | 0       | -0.03   | 276.16   | 160 | 30.8 | Homatropine                                    |
| 276.1945 | 0       | -0.03   | 276.16   | 220 | 77.4 | Homatropine                                    |
| 276.1945 | 275.152 | -0.0351 | 276.1594 | 285 | 74.2 | Homatropine                                    |

|          |         |         |          |     |      |                                        |
|----------|---------|---------|----------|-----|------|----------------------------------------|
| 164.0069 | 163.046 | 0.0459  | 164.0528 | 74  | 44   | Benzothiazole, 2,5-dimethyl-           |
| 164.0069 | 163.046 | 0.0459  | 164.0528 | 118 | 67.7 | Benzothiazole, 2,5-dimethyl-           |
| 164.0069 | 163.046 | 0.0459  | 164.0528 | 151 | 80   | Benzothiazole, 2,5-dimethyl-           |
| 164.0069 | 163.048 | 0.0484  | 164.0553 | 147 | 60   | 4-Hydroxy-L-glutamic acid              |
| 327.2164 | 326.199 | -0.0097 | 327.2067 | 70  | 60   | Ajmaline                               |
| 327.2164 | 344.199 | -0.0209 | 327.1955 | 128 | 100  | Tetrahydrocannabinol(nor-delta-9-HOOC) |
| 327.2164 | 326.192 | -0.0176 | 327.1988 | 156 | 47.8 | Dodecylbenzenesulfonic acid            |
| 176.1195 | 175.121 | 0.0086  | 176.1281 | 301 | 65.6 | Threonine, butyl ester                 |
| 176.1195 | 175     | -0.05   | 176.07   | 78  | 79.6 | 1-Methoxy-3-carbaldehyde               |
| 176.1195 | 175     | -0.05   | 176.07   | 105 | 56.6 | 1-Methoxy-3-carbaldehyde               |
| 205.1375 | 188.116 | -0.0181 | 205.1194 | 155 | 90.1 | Glycyl-L-norleucine                    |
| 205.1375 | 204.09  | -0.0403 | 205.0972 | 201 | 92.9 | Fenozolone                             |
| 205.1375 | 204.09  | -0.0403 | 205.0972 | 263 | 73.3 | Fenozolone                             |
| 205.1375 | 408.201 | -0.0298 | 205.1077 | 341 | 52.1 | Phe-Asp-Lys                            |
| 149.0908 | 148     | -0.05   | 149.04   | 89  | 64.1 | (S)-(+)-Citramalic acid                |
| 149.0908 | 148.1   | 0.0165  | 149.1073 | 130 | 76.5 | Normicotine                            |
| 149.0908 | 165.115 | 0.0053  | 149.0961 | 146 | 78.2 | (+/-)-p-Methoxyamphetamine             |
| 149.0908 | 148.1   | 0.0165  | 149.1073 | 197 | 64.7 | N-Benzylacetamidine                    |
| 149.1107 | 148.1   | -0.0034 | 149.1073 | 11  | 39   | N-Benzylacetamidine                    |
| 149.1107 | 165.115 | -0.0146 | 149.0961 | 142 | 86.8 | (+/-)-p-Methoxyamphetamine             |
| 149.1107 | 148.1   | -0.0034 | 149.1073 | 196 | 55.4 | N-Benzylacetamidine                    |
| 149.1107 | 166.063 | -0.051  | 149.0597 | 261 | 71.6 | Tropic acid                            |
| 149.0962 | 165.115 | -0.0001 | 149.0961 | 169 | 95.2 | (+/-)-p-Methoxyamphetamine             |
| 149.0962 | 165.115 | -0.0001 | 149.0961 | 177 | 76.2 | (+/-)-p-Methoxyamphetamine             |
| 149.0962 | 165.115 | -0.0001 | 149.0961 | 118 | 81.2 | (+/-)-p-Methoxyamphetamine             |
| 149.0962 | 165.115 | -0.0001 | 149.0961 | 239 | 80.7 | (+/-)-p-Methoxyamphetamine             |
| 371.2391 | 370.196 | -0.0354 | 371.2037 | 19  | 100  | His-Ser-Lys                            |
| 149.0962 | 165.115 | -0.0001 | 149.0961 | 86  | 82.8 | (+/-)-p-Methoxyamphetamine             |
| 149.0962 | 165.115 | -0.0001 | 149.0961 | 201 | 80.4 | (+/-)-p-Methoxyamphetamine             |
| 149.0962 | 165.115 | -0.0001 | 149.0961 | 191 | 83.8 | (+/-)-p-Methoxyamphetamine             |
| 149.0962 | 165.115 | -0.0001 | 149.0961 | 219 | 77.3 | (+/-)-p-Methoxyamphetamine             |
| 150.1003 | 167.095 | -0.009  | 150.0913 | 139 | 49.6 | Synephrine                             |
| 150.1003 | 149.07  | -0.0229 | 150.0774 | 288 | 70.8 | Adenine, N6-methyl                     |
| 150.1003 | 149.07  | -0.0229 | 150.0774 | 286 | 87.5 | Adenine, N6-methyl                     |
| 150.1003 | 149.07  | -0.0229 | 150.0774 | 285 | 66.6 | Adenine, N6-methyl                     |
| 205.1202 | 188.116 | -0.0008 | 205.1194 | 188 | 78.3 | Glycyl-L-norleucine                    |

|          |         |         |          |     |      |                              |
|----------|---------|---------|----------|-----|------|------------------------------|
| 205.1202 | 204.075 | -0.0383 | 205.0819 | 142 | 60.4 | Gly-Glu                      |
| 205.1202 | 408.223 | -0.001  | 205.119  | 214 | 12   | His-Pro-Arg                  |
| 205.1202 | 204.09  | -0.023  | 205.0972 | 221 | 19   | Fenozolone                   |
| 176.1125 | 350.195 | -0.007  | 176.105  | 61  | 65.8 | Phe-Gly-Lys                  |
| 176.1125 | 175     | -0.04   | 176.07   | 101 | 78.2 | 1-Methoxy-3-carbaldehyde     |
| 149.1041 | 148.1   | 0.0032  | 149.1073 | 69  | 59.3 | N-Benzylacetamidine          |
| 149.1041 | 165.115 | -0.008  | 149.0961 | 191 | 94   | (.+/-)-p-Methoxyamphetamine  |
| 149.1041 | 165.115 | -0.008  | 149.0961 | 243 | 81.9 | (.+/-)-p-Methoxyamphetamine  |
| 149.1041 | 165.115 | -0.008  | 149.0961 | 260 | 53.8 | (.+/-)-p-Methoxyamphetamine  |
| 176.1125 | 175.121 | 0.0156  | 176.1281 | 58  | 68.7 | Threonine, butyl ester       |
| 164.0069 | 163.046 | 0.0459  | 164.0528 | 119 | 54.1 | Benzothiazole, 2,5-dimethyl- |
| 164.0069 | 163.046 | 0.0459  | 164.0528 | 129 | 74.1 | Benzothiazole, 2,5-dimethyl- |
| 164.0069 | 163.049 | 0.0498  | 164.0567 | 15  | 100  | Pterine                      |
| 257.1488 | 256.117 | -0.0244 | 257.1244 | 69  | 54.2 | Thr-His                      |
| 257.1488 | 256.117 | -0.0244 | 257.1244 | 118 | 43.5 | Thr-His                      |
| 257.1488 | 256.11  | -0.0316 | 257.1172 | 108 | 62.9 | Pterostilbene                |
| 257.1488 | 256.11  | -0.0316 | 257.1172 | 148 | 100  | Pterostilbene                |
| 164.0069 | 163.046 | 0.0459  | 164.0528 | 151 | 80.2 | Benzothiazole, 2,5-dimethyl- |
| 164.0069 | 163.049 | 0.0498  | 164.0567 | 109 | 67.3 | Pterine                      |
| 164.0069 | 163.046 | 0.0459  | 164.0528 | 79  | 100  | Benzothiazole, 2,5-dimethyl- |
| 164.0069 | 163.048 | 0.0484  | 164.0553 | 128 | 62.8 | 4-Hydroxy-L-glutamic acid    |
| 164.0069 | 163.046 | 0.0459  | 164.0528 | 164 | 86.3 | Benzothiazole, 2,5-dimethyl- |
| 164.0069 | 163.046 | 0.0459  | 164.0528 | 109 | 72.4 | Benzothiazole, 2,5-dimethyl- |
| 164.0069 | 163     | 0.03    | 164.04   | 71  | 84.7 | N-Acetyl-L-cysteine          |
| 164.0069 | 163.049 | 0.0498  | 164.0567 | 51  | 56   | Pterine                      |
| 238.168  | 474.234 | -0.0438 | 238.1242 | 80  | 41.7 | Trp-Asn-Arg                  |
| 238.168  | 474.234 | -0.0438 | 238.1242 | 44  | 35.5 | Trp-Asn-Arg                  |
| 238.168  | 237.136 | -0.0242 | 238.1438 | 33  | 100  | Viloxazine                   |
| 176.1195 | 175.121 | 0.0086  | 176.1281 | 4   | 100  | Threonine, butyl ester       |
| 176.1195 | 175     | -0.05   | 176.07   | 31  | 100  | 1-Methoxy-3-carbaldehyde     |
| 205.1375 | 188.116 | -0.0181 | 205.1194 | 100 | 60.9 | Glycyl-L-norleucine          |
| 205.1375 | 188.116 | -0.0181 | 205.1194 | 37  | 79.6 | Glycyl-L-norleucine          |
| 205.1375 | 204.09  | -0.0403 | 205.0972 | 56  | 100  | Fenozolone                   |
| 205.1375 | 204.09  | -0.0403 | 205.0972 | 289 | 82.1 | Ethotoin                     |
| 205.1375 | 188.116 | -0.0181 | 205.1194 | 176 | 59.4 | Glycyl-L-norleucine          |
| 205.1375 | 408.201 | -0.0298 | 205.1077 | 165 | 15.8 | Phe-Asp-Lys                  |
| 205.1375 | 204.09  | -0.0403 | 205.0972 | 173 | 65.6 | Fenozolone                   |
| 205.1375 | 408.212 | -0.0242 | 205.1133 | 305 | 56.1 | Phe-Ser-Arg                  |
| 169.1265 | 168.115 | -0.0042 | 169.1223 | 37  | 33.6 | Jasmine lactone              |
| 169.1265 | 336.147 | -0.0459 | 169.0806 | 125 | 75.1 | Ser-Cys-Lys                  |
| 169.1265 | 168.115 | -0.0042 | 169.1223 | 136 | 61.6 | Jasmine lactone              |
| 150.1003 | 167.095 | -0.009  | 150.0913 | 116 | 33.3 | Synephrine                   |
| 150.1003 | 149.07  | -0.0229 | 150.0774 | 62  | 41.2 | Adenine, N6-methyl           |
| 150.1003 | 149.105 | 0.0122  | 150.1125 | 172 | 55.1 | Triethanolamine              |

|          |         |         |          |     |      |                              |
|----------|---------|---------|----------|-----|------|------------------------------|
| 150.1003 | 167.095 | -0.009  | 150.0913 | 353 | 77.4 | Synephrine                   |
| 150.1003 | 303.147 | -0.009  | 150.0913 | 79  | 56.6 | Cocaine                      |
| 150.1003 | 149.084 | -0.009  | 150.0913 | 169 | 24.3 | S(-)-Cathinone               |
| 150.1003 | 149.07  | -0.0229 | 150.0774 | 95  | 52.4 | Adenine, N6-methyl           |
| 150.1003 | 149.07  | -0.0229 | 150.0774 | 87  | 100  | Adenine, N6-methyl           |
| 169.1115 | 146.069 | -0.0531 | 169.0584 | 53  | 18.6 | Gly-Ala                      |
| 169.1115 | 168.115 | 0.0108  | 169.1223 | 179 | 94.7 | Jasmine lactone              |
| 169.1115 | 186.1   | -0.0143 | 169.0972 | 183 | 89.3 | Ala-Pro                      |
| 285.284  | 302.246 | -0.0416 | 285.2424 | 30  | 100  | Glycerol 1-myristate         |
| 285.284  | 302.246 | -0.0416 | 285.2424 | 63  | 100  | Glycerol 1-myristate         |
| 285.284  | 302.246 | -0.0416 | 285.2424 | 87  | 100  | Glycerol 1-myristate         |
| 285.284  | 302.246 | -0.0416 | 285.2424 | 183 | 100  | Glycerol 1-myristate         |
| 164.0069 | 163.046 | 0.0459  | 164.0528 | 68  | 51.9 | Benzothiazole, 2,5-dimethyl- |
| 164.0069 | 163.046 | 0.0459  | 164.0528 | 100 | 84.5 | Benzothiazole, 2,5-dimethyl- |
| 164.0069 | 163.038 | 0.0386  | 164.0455 | 37  | 100  | 7-Nitroindazole              |
| 164.0069 | 163.046 | 0.0459  | 164.0528 | 116 | 76.7 | Benzothiazole, 2,5-dimethyl- |
| 164.0069 | 163.046 | 0.0459  | 164.0528 | 94  | 39.9 | Benzothiazole, 2,5-dimethyl- |
| 164.0069 | 163.049 | 0.0498  | 164.0567 | 42  | 100  | Pterine                      |
| 164.0069 | 163.046 | 0.0459  | 164.0528 | 114 | 66.9 | Benzothiazole, 2,5-dimethyl- |
| 164.0069 | 163.049 | 0.0498  | 164.0567 | 69  | 79.3 | Pterine                      |
| 164.0069 | 163.038 | 0.0386  | 164.0455 | 6   | 100  | 7-Nitroindazole              |
| 164.0069 | 163.046 | 0.0459  | 164.0528 | 123 | 82.5 | Benzothiazole, 2,5-dimethyl- |
| 164.0069 | 163.046 | 0.0459  | 164.0528 | 67  | 79.6 | Benzothiazole, 2,5-dimethyl- |
| 164.0069 | 163.049 | 0.0498  | 164.0567 | 86  | 81.2 | Pterine                      |
| 164.0069 | 163.048 | 0.0484  | 164.0553 | 51  | 100  | 4-Hydroxy-L-glutamic acid    |
| 225.154  | 0       | 0       | 225.15   | 44  | 80.9 | Methyl jasmonate             |
| 225.154  | 224.116 | -0.0306 | 225.1234 | 42  | 77.6 | Butalbital                   |
| 225.154  | 448.207 | -0.0432 | 225.1108 | 49  | 19.6 | PyroGlu-Tyr-Arg              |
| 164.0069 | 163.046 | 0.0459  | 164.0528 | 78  | 66.9 | Benzothiazole, 2,5-dimethyl- |
| 164.0069 | 163.046 | 0.0459  | 164.0528 | 152 | 93.2 | Benzothiazole, 2,5-dimethyl- |
| 164.0069 | 163.049 | 0.0498  | 164.0567 | 28  | 61.5 | Pterine                      |
| 164.0069 | 163.038 | 0.0386  | 164.0455 | 30  | 100  | 7-Nitroindazole              |
| 134.1002 | 151.1   | -0.0038 | 134.0964 | 134 | 53.9 | Norephedrine                 |
| 134.1002 | 283.164 | -0.024  | 134.0762 | 187 | 20.9 | Lys-His                      |
| 134.1002 | 0       | -0.04   | 134.06   | 199 | 81.1 | Oxindole                     |
| 134.1002 | 151.1   | -0.0038 | 134.0964 | 1   | 51   | Norephedrine                 |
| 343.2942 | 342.256 | -0.031  | 343.2632 | 158 | 77   | Retinyl propionate           |
| 343.2942 | 342.256 | -0.031  | 343.2632 | 209 | 50.4 | Retinyl propionate           |
| 569.3045 | 1138    | -0.037  | 569.2675 | 9   | 100  | CYFVNCPRG/2                  |
| 150.1003 | 167.095 | -0.009  | 150.0913 | 108 | 48   | Synephrine                   |
| 150.1003 | 149.12  | 0.0274  | 150.1277 | 138 | 71.1 | N,N-Diethylaniline           |
| 150.1003 | 149.12  | 0.0274  | 150.1277 | 117 | 49.2 | Methamphetamine              |
| 150.1003 | 0       | -0.01   | 150.09   | 74  | 11.4 | 2-Aminopropiophenone         |
| 343.2942 | 171.126 | -0.0351 | 343.2591 | 193 | 78.2 | Gabapentin                   |
| 343.2942 | 342.256 | -0.031  | 343.2632 | 71  | 60.8 | Retinyl propionate           |
| 150.1003 | 167.095 | -0.009  | 150.0913 | 108 | 86.6 | Synephrine                   |

|          |         |         |          |     |      |                                                    |
|----------|---------|---------|----------|-----|------|----------------------------------------------------|
| 150.1003 | 167.058 | -0.045  | 150.055  | 183 | 76.5 | 3-Methyl-2-nitrobenzyl alcohol                     |
| 150.1003 | 150.128 | 0.0274  | 150.1277 | 174 | 77.9 | N-Butyl-4-methylpyridinium                         |
| 150.1003 | 149.07  | -0.0229 | 150.0774 | 102 | 71.9 | Adenine, N6-methyl                                 |
| 211.1743 | 210.159 | -0.0077 | 211.1666 | 27  | 100  | Altretamine                                        |
| 211.1743 | 437.264 | -0.0484 | 211.1259 | 17  | 100  | Lys-Tyr-Lys                                        |
| 211.1743 | 0       | 0       | 211.17   | 296 | 80.4 | altretamine                                        |
| 211.1743 | 210.126 | -0.0414 | 211.1329 | 145 | 63.3 | Jasmonic Acid                                      |
| 180.0344 | 362.082 | -0.0008 | 180.0336 | 78  | 100  | Piperazine-N,N'-bis(2-hydroxypropanesulfonic acid) |
| 180.0344 | 362.082 | -0.0008 | 180.0336 | 176 | 81.3 | Piperazine-N,N'-bis(2-hydroxypropanesulfonic acid) |
| 180.0344 | 362.082 | -0.0008 | 180.0336 | 17  | 57.3 | Piperazine-N,N'-bis(2-hydroxypropanesulfonic acid) |
| 149.0908 | 165.115 | 0.0053  | 149.0961 | 204 | 76.6 | (.+/-)-p-Methoxyamphetamine                        |
| 149.0908 | 148.1   | 0.0165  | 149.1073 | 149 | 86.8 | N-Benzylacetamidine                                |
| 149.0908 | 165.115 | 0.0053  | 149.0961 | 80  | 71.4 | (.+/-)-p-Methoxyamphetamine                        |
| 326.1619 | 325.135 | -0.02   | 326.1419 | 118 | 50   | Clemizole                                          |
| 343.2942 | 342.256 | -0.031  | 343.2632 | 74  | 68.4 | Retinyl propionate                                 |
| 343.2942 | 342.256 | -0.031  | 343.2632 | 35  | 100  | Retinyl propionate                                 |
| 150.1003 | 149.07  | -0.0229 | 150.0774 | 184 | 57.2 | Adenine, N6-methyl                                 |
| 150.1003 | 167.095 | -0.009  | 150.0913 | 160 | 79   | Synephrine                                         |
| 150.1003 | 149.12  | 0.0274  | 150.1277 | 142 | 50.7 | Methamphetamine                                    |
| 150.1003 | 167.095 | -0.009  | 150.0913 | 121 | 75   | Synephrine                                         |
| 343.2942 | 342.256 | -0.031  | 343.2632 | 95  | 84.5 | Retinyl propionate                                 |
| 164.0069 | 163.046 | 0.0459  | 164.0528 | 111 | 77.4 | Benzothiazole, 2,5-dimethyl-                       |
| 164.0069 | 163.048 | 0.0484  | 164.0553 | 136 | 52   | 4-Hydroxy-L-glutamic acid                          |
| 164.0069 | 163.046 | 0.0459  | 164.0528 | 47  | 69.5 | Benzothiazole, 2,5-dimethyl-                       |
| 164.0069 | 163.046 | 0.0459  | 164.0528 | 128 | 85.9 | Benzothiazole, 2,5-dimethyl-                       |
| 164.0069 | 163.038 | 0.0386  | 164.0455 | 7   | 100  | 7-Nitroindazole                                    |
| 164.0069 | 163.046 | 0.0459  | 164.0528 | 77  | 59.9 | Benzothiazole, 2,5-dimethyl-                       |
| 164.0069 | 163.046 | 0.0459  | 164.0528 | 106 | 92.5 | Benzothiazole, 2,5-dimethyl-                       |
| 164.0069 | 163     | 0.03    | 164.04   | 50  | 48.3 | N-Acetyl-L-cysteine                                |
| 180.0344 | 181.041 | -0.0008 | 180.0336 | 7   | 100  | Acamprosate                                        |
| 180.0344 | 179.058 | 0.0311  | 180.0655 | 1   | 100  | Hippuric acid                                      |
| 180.0344 | 362.082 | -0.0008 | 180.0336 | 197 | 83   | Piperazine-N,N'-bis(2-hydroxypropanesulfonic acid) |
| 180.0344 | 179.025 | -0.0019 | 180.0325 | 16  | 100  | S-Carboxymethyl-L-cysteine                         |
| 343.2942 | 408.288 | -0.0299 | 343.2643 | 23  | 100  | Cholic acid                                        |
| 211.1113 | 210.126 | 0.0216  | 211.1329 | 13  | 100  | Jasmonic Acid                                      |
| 211.1113 | 210.126 | 0.0216  | 211.1329 | 26  | 56   | Jasmonic Acid                                      |
| 211.1113 | 420.179 | -0.0145 | 211.0968 | 173 | 74.5 | Met-Asp-Arg                                        |
| 211.1113 | 210.1   | -0.0036 | 211.1077 | 25  | 66   | Aprobarbital                                       |
| 257.1488 | 256.117 | -0.0244 | 257.1244 | 40  | 100  | Thr-His                                            |
| 257.1488 | 256.117 | -0.0244 | 257.1244 | 37  | 100  | Thr-His                                            |

|          |         |         |          |     |      |                                     |
|----------|---------|---------|----------|-----|------|-------------------------------------|
| 257.1488 | 256.117 | -0.0244 | 257.1244 | 9   | 39.5 | Thr-His                             |
| 257.1488 | 256.11  | -0.0316 | 257.1172 | 67  | 100  | Pterostilbene                       |
| 176.1195 | 350.195 | -0.015  | 176.105  | 16  | 100  | Phe-Gly-Lys                         |
| 150.1003 | 167.095 | -0.009  | 150.0913 | 131 | 72   | Synephrine                          |
| 150.1003 | 167.095 | -0.009  | 150.0913 | 100 | 54.7 | Synephrine                          |
| 150.1003 | 149.07  | -0.0229 | 150.0774 | 86  | 67.1 | Adenine, N6-methyl                  |
| 150.1003 | 149.07  | -0.0229 | 150.0774 | 135 | 62.5 | Adenine, N6-methyl                  |
| 150.1003 | 167.095 | -0.009  | 150.0913 | 24  | 66   | Synephrine                          |
| 150.1003 | 149.07  | -0.0229 | 150.0774 | 168 | 49.6 | Adenine, N6-methyl                  |
| 150.1003 | 303.147 | -0.009  | 150.0913 | 92  | 56.6 | Cocaine                             |
| 150.1003 | 149     | -0.04   | 150.06   | 265 | 71.9 | L-Methionine                        |
| 150.1003 | 167.058 | -0.045  | 150.055  | 144 | 72.1 | 3-Methyl-2-nitrobenzyl alcohol      |
| 150.1003 | 149.07  | -0.0229 | 150.0774 | 33  | 29.7 | Adenine, N6-methyl                  |
| 150.1003 | 150.128 | 0.0274  | 150.1277 | 191 | 71.3 | N-Butyl-4-methylpyridinium          |
| 150.1003 | 167.095 | -0.009  | 150.0913 | 66  | 59.7 | Synephrine                          |
| 343.3048 | 342.256 | -0.0416 | 343.2632 | 147 | 72.2 | Retinyl propionate                  |
| 343.3048 | 408.288 | -0.0405 | 343.2643 | 5   | 100  | Cholic acid                         |
| 134.0966 | 151.1   | -0.0002 | 134.0964 | 58  | 100  | Norephedrine                        |
| 134.0966 | 133.089 | -0.0002 | 134.0964 | 128 | 28.4 | Cyclopropanamine, 2-phenyl-, trans- |
| 134.0966 | 0       | -0.04   | 134.06   | 190 | 45   | Oxindole                            |
| 134.0966 | 151.1   | -0.0002 | 134.0964 | 90  | 43.4 | Norephedrine                        |
| 285.284  | 302.246 | -0.0416 | 285.2424 | 29  | 100  | Glycerol 1-myristate                |
| 285.284  | 302.246 | -0.0416 | 285.2424 | 210 | 100  | Glycerol 1-myristate                |
| 205.1202 | 204.09  | -0.023  | 205.0972 | 92  | 39.1 | Fenozolone                          |
| 205.1202 | 204.075 | -0.0383 | 205.0819 | 163 | 70.3 | Gly-Glu                             |
| 205.1202 | 408.201 | -0.0125 | 205.1077 | 187 | 20.4 | Phe-Asp-Lys                         |
| 205.1202 | 204.09  | -0.023  | 205.0972 | 212 | 72.8 | Fenozolone                          |
| 287.2379 | 286.193 | -0.0373 | 287.2006 | 84  | 45.9 | 4,6-Androstadien-17.beta.-ol-3-one  |
| 287.2379 | 286.193 | -0.0373 | 287.2006 | 97  | 74.9 | 4,6-Androstadien-17.beta.-ol-3-one  |
| 287.2379 | 286.23  | -0.001  | 287.2369 | 53  | 100  | Retinol                             |
| 257.1488 | 256.11  | -0.0316 | 257.1172 | 105 | 100  | Pterostilbene                       |
| 343.2942 | 408.288 | -0.0299 | 343.2643 | 15  | 100  | Cholic acid                         |
| 343.2942 | 408.288 | -0.0299 | 343.2643 | 59  | 100  | Cholic acid                         |
| 343.2942 | 408.288 | -0.0299 | 343.2643 | 61  | 100  | Cholic acid                         |
| 343.2942 | 342.256 | -0.031  | 343.2632 | 13  | 100  | Retinyl propionate                  |
| 164.0069 | 163.046 | 0.0459  | 164.0528 | 99  | 62.9 | Benzothiazole, 2,5-dimethyl-        |
| 164.0069 | 163.046 | 0.0459  | 164.0528 | 108 | 84.5 | Benzothiazole, 2,5-dimethyl-        |
| 164.0069 | 163.038 | 0.0386  | 164.0455 | 9   | 100  | 7-Nitroindazole                     |
| 164.0069 | 163.046 | 0.0459  | 164.0528 | 86  | 75.5 | Benzothiazole, 2,5-dimethyl-        |
| 164.0069 | 163.046 | 0.0459  | 164.0528 | 94  | 80   | Benzothiazole, 2,5-dimethyl-        |
| 285.284  | 302.246 | -0.0416 | 285.2424 | 93  | 100  | Glycerol 1-myristate                |
| 164.0069 | 163.046 | 0.0459  | 164.0528 | 86  | 69.8 | Benzothiazole, 2,5-dimethyl-        |
| 164.0069 | 163.046 | 0.0459  | 164.0528 | 127 | 89.3 | Benzothiazole, 2,5-dimethyl-        |



|          |         |         |          |     |      |                                                    |
|----------|---------|---------|----------|-----|------|----------------------------------------------------|
| 164.0069 | 163.046 | 0.0459  | 164.0528 | 112 | 78.6 | Benzothiazole, 2,5-dimethyl-                       |
| 164.0069 | 163.049 | 0.0498  | 164.0567 | 33  | 58.6 | Pterine                                            |
| 169.1067 | 168.115 | 0.0156  | 169.1223 | 59  | 100  | Jasmine lactone                                    |
| 169.1067 | 168.09  | -0.0095 | 169.0972 | 28  | 59.9 | Pyridoxamine                                       |
| 169.1067 | 168.069 | -0.031  | 169.076  | 3   | 100  | Norharmane                                         |
| 211.1441 | 210.159 | 0.0225  | 211.1666 | 20  | 100  | Altretamine                                        |
| 211.1441 | 0       | -0.01   | 211.13   | 47  | 44.7 | Jasmonic acid                                      |
| 211.1441 | 210.126 | -0.0112 | 211.1329 | 97  | 41.1 | Jasmonic Acid                                      |
| 211.1441 | 420.249 | -0.0126 | 211.1315 | 97  | 39.7 | Phe-Val-Arg                                        |
| 211.1441 | 210.159 | 0.0225  | 211.1666 | 12  | 100  | Altretamine                                        |
| 211.1441 | 210.126 | -0.0112 | 211.1329 | 61  | 100  | Jasmonic Acid                                      |
| 211.1441 | 420.179 | -0.0473 | 211.0968 | 26  | 100  | Met-Asp-Arg                                        |
| 211.1441 | 420.179 | -0.0473 | 211.0968 | 152 | 34.3 | Met-Asp-Arg                                        |
| 283.1685 | 282.179 | 0.0179  | 283.1864 | 23  | 100  | 1,3-Bis(tris(hydroxymethyl)methylamino)propane     |
| 283.1685 | 260.148 | -0.0308 | 283.1377 | 90  | 69.6 | Lys-Asn                                            |
| 283.1685 | 282.122 | -0.0396 | 283.1289 | 145 | 41.4 | Thr-Tyr                                            |
| 283.1685 | 282.122 | -0.0396 | 283.1289 | 151 | 58.2 | Tyr-Thr                                            |
| 176.1195 | 175.121 | 0.0086  | 176.1281 | 24  | 44   | Threonine, butyl ester                             |
| 211.1441 | 210.126 | -0.0112 | 211.1329 | 126 | 87   | Jasmonic Acid                                      |
| 211.1441 | 0       | -0.01   | 211.13   | 47  | 34.9 | Jasmonic acid                                      |
| 211.1441 | 0       | -0.01   | 211.13   | 34  | 55.4 | Jasmonic acid                                      |
| 211.1441 | 210.1   | -0.0364 | 211.1077 | 182 | 27.7 | Aprobarbital                                       |
| 169.1299 | 168.115 | -0.0076 | 169.1223 | 61  | 100  | Jasmine lactone                                    |
| 169.1299 | 168.115 | -0.0076 | 169.1223 | 95  | 100  | Jasmine lactone                                    |
| 176.1195 | 175     | -0.05   | 176.07   | 7   | 100  | 1-Methoxy-3-carbaldehyde                           |
| 176.1195 | 175.121 | 0.0086  | 176.1281 | 14  | 53.1 | Threonine, butyl ester                             |
| 211.1441 | 228.136 | -0.0112 | 211.1329 | 73  | 62.8 | trans-Traumatic acid                               |
| 211.1441 | 210.126 | -0.0112 | 211.1329 | 100 | 40.7 | Jasmonic Acid                                      |
| 211.1441 | 210.126 | -0.0112 | 211.1329 | 52  | 38.7 | Jasmonic Acid                                      |
| 211.1441 | 0       | -0.04   | 211.1    | 158 | 35.4 | Sinapyl alcohol                                    |
| 211.1441 | 210.116 | -0.021  | 211.123  | 21  | 58.6 | Naphtazoline                                       |
| 211.1441 | 210.126 | -0.0112 | 211.1329 | 138 | 72.3 | Jasmonic Acid                                      |
| 211.1441 | 210.126 | -0.0112 | 211.1329 | 148 | 35.5 | Jasmonic Acid                                      |
| 649.4343 | 2597    | -0.0288 | 649.4055 | 7   | 100  | YGRKKRRQRRRGPKRRLD<br>L/4                          |
| 164.0069 | 163.046 | 0.0459  | 164.0528 | 71  | 56.3 | Benzothiazole, 2,5-dimethyl-                       |
| 164.0069 | 0       | 0.03    | 164.04   | 156 | 74.6 | Acetylcysteine                                     |
| 164.0069 | 163.038 | 0.0386  | 164.0455 | 3   | 100  | 7-Nitroindazole                                    |
| 164.0069 | 163.046 | 0.0459  | 164.0528 | 80  | 74.4 | Benzothiazole, 2,5-dimethyl-                       |
| 164.0069 | 163.046 | 0.0459  | 164.0528 | 110 | 92.7 | Benzothiazole, 2,5-dimethyl-                       |
| 180.0344 | 181.041 | -0.0008 | 180.0336 | 3   | 100  | Acamprosate                                        |
| 180.0344 | 362.082 | -0.0008 | 180.0336 | 58  | 100  | Piperazine-N,N'-bis(2-hydroxypropanesulfonic acid) |
| 180.0344 | 157.074 | 0.0287  | 180.0631 | 1   | 100  | N-Tigloylglycine                                   |
| 225.154  | 0       | 0       | 225.15   | 45  | 100  | Methyl jasmonate                                   |

|          |         |         |          |     |      |                                                    |
|----------|---------|---------|----------|-----|------|----------------------------------------------------|
| 225.154  | 448.207 | -0.0432 | 225.1108 | 54  | 100  | PyroGlu-Tyr-Arg                                    |
| 164.0069 | 163.046 | 0.0459  | 164.0528 | 86  | 69.1 | Benzothiazole, 2,5-dimethyl-                       |
| 164.0069 | 163.046 | 0.0459  | 164.0528 | 70  | 64.9 | Benzothiazole, 2,5-dimethyl-                       |
| 225.1606 | 448.229 | -0.039  | 225.122  | 137 | 33.3 | His-His-Arg                                        |
| 225.1606 | 202.143 | -0.0284 | 225.1322 | 28  | 100  | N(G),N(G')-Dimethyl-L-arginine                     |
| 225.1606 | 224.116 | -0.0372 | 225.1234 | 38  | 29.4 | Butalbital                                         |
| 205.1202 | 204.072 | -0.0408 | 205.0794 | 71  | 38   | Levamisole                                         |
| 205.1202 | 204.075 | -0.0383 | 205.0819 | 146 | 43.6 | Gly-Glu                                            |
| 205.1202 | 204.075 | -0.0383 | 205.0819 | 88  | 20.3 | Gly-Glu                                            |
| 205.1202 | 204.1   | -0.013  | 205.107  | 130 | 36.8 | 1,6-Anhydro-b-D-glucose, permethyl-                |
| 225.1606 | 0       | -0.01   | 225.15   | 7   | 100  | Methyl jasmonate                                   |
| 225.1606 | 224.127 | -0.026  | 225.1346 | 121 | 93.3 | Pirimicarb-desmethyl                               |
| 180.0344 | 181.041 | -0.0008 | 180.0336 | 7   | 100  | Acamprosate                                        |
| 180.0344 | 362.082 | -0.0008 | 180.0336 | 180 | 84.2 | Piperazine-N,N'-bis(2-hydroxypropanesulfonic acid) |
| 180.0344 | 362.082 | -0.0008 | 180.0336 | 110 | 100  | Piperazine-N,N'-bis(2-hydroxypropanesulfonic acid) |
| 180.0344 | 362.082 | -0.0008 | 180.0336 | 76  | 76.9 | Piperazine-N,N'-bis(2-hydroxypropanesulfonic acid) |
| 163.1098 | 162.126 | 0.0231  | 163.1329 | 122 | 69.7 | Ethanol, 2-(2-butoxyethoxy)-                       |
| 163.1098 | 162.126 | 0.0231  | 163.1329 | 207 | 62   | Ethanol, 2-(2-butoxyethoxy)-                       |
| 163.1098 | 179.095 | -0.0344 | 163.0754 | 40  | 25.9 | 3,4-Methylenedioxyamphetamine                      |
| 163.1098 | 162.1   | -0.0021 | 163.1077 | 86  | 25.8 | DL-Lysine, 5-hydroxy-                              |
| 134.0898 | 151.1   | 0.0066  | 134.0964 | 27  | 39.4 | Norephedrine                                       |
| 134.0898 | 135     | -0.04   | 134.05   | 87  | 30.7 | Adenine                                            |
| 320.1349 | 362.139 | 0.0056  | 320.1405 | 7   | 100  | Marbofloxacin                                      |
| 320.1349 | 320.092 | -0.0432 | 320.0917 | 21  | 100  | Coptisine cation                                   |
| 134.0898 | 134.11  | 0.019   | 134.109  | 48  | 77.3 | Benzene, n-butyl-                                  |
| 134.0898 | 0       | -0.03   | 134.06   | 136 | 82.3 | Oxindole                                           |
| 134.0898 | 0       | -0.03   | 134.06   | 288 | 88.4 | Oxindole                                           |
| 149.0908 | 165.115 | 0.0053  | 149.0961 | 9   | 29   | (.+/-)-p-Methoxyamphetamine                        |
| 149.0908 | 150.053 | -0.0453 | 149.0455 | 312 | 37.6 | D-Lyxose                                           |
| 149.0908 | 148.1   | 0.0165  | 149.1073 | 48  | 61.5 | N-Benzylacetamidine                                |
| 211.1441 | 210.126 | -0.0112 | 211.1329 | 81  | 44.9 | Jasmonic Acid                                      |
| 211.1441 | 210.126 | -0.0112 | 211.1329 | 201 | 75   | Jasmonic Acid                                      |
| 211.1441 | 420.179 | -0.0473 | 211.0968 | 225 | 66   | Met-Asp-Arg                                        |
| 211.1441 | 420.223 | -0.025  | 211.119  | 182 | 59.8 | His-His-Lys                                        |
| 211.1441 | 210.159 | 0.0225  | 211.1666 | 12  | 51   | Altretamine                                        |
| 211.1441 | 210.126 | -0.0112 | 211.1329 | 134 | 64.2 | Jasmonic Acid                                      |
| 211.1441 | 420.223 | -0.025  | 211.119  | 216 | 52.9 | His-His-Lys                                        |
| 211.1441 | 210.126 | -0.0112 | 211.1329 | 29  | 55.4 | Jasmonic Acid                                      |
| 211.1441 | 210     | -0.01   | 211.13   | 152 | 78.7 | (+)-Jasmonic acid                                  |
| 211.1441 | 210.126 | -0.0112 | 211.1329 | 131 | 43.7 | Jasmonic Acid                                      |

|          |         |         |          |     |      |                                    |
|----------|---------|---------|----------|-----|------|------------------------------------|
| 211.1441 | 210.126 | -0.0112 | 211.1329 | 96  | 42.9 | Jasmonic Acid                      |
| 211.1441 | 0       | -0.01   | 211.13   | 228 | 59.4 | Jasmonic acid                      |
| 310.1687 | 287.196 | 0.016   | 310.185  | 29  | 63.5 | Ile-Arg                            |
| 310.1687 | 309.194 | 0.0326  | 310.2013 | 136 | 39.3 | Nadolol                            |
| 211.1441 | 210.116 | -0.021  | 211.123  | 58  | 76.9 | Naphtazoline                       |
| 211.1441 | 210.126 | -0.0112 | 211.1329 | 150 | 70   | Jasmonic Acid                      |
| 211.1441 | 210.116 | -0.021  | 211.123  | 1   | 100  | Naphtazoline                       |
| 211.1441 | 210.126 | -0.0112 | 211.1329 | 160 | 32   | Jasmonic Acid                      |
| 169.1265 | 168     | -0.03   | 169.1    | 122 | 100  | Pyridoxamine dihydrochloride       |
| 169.1265 | 0       | -0.05   | 169.08   | 29  | 100  | Norharman                          |
| 257.1488 | 256.117 | -0.0244 | 257.1244 | 47  | 49   | His-Thr                            |
| 257.1488 | 256.117 | -0.0244 | 257.1244 | 34  | 100  | Thr-His                            |
| 257.1488 | 256.117 | -0.0244 | 257.1244 | 40  | 70.2 | His-Thr                            |
| 225.154  | 0       | -0.05   | 225.1    | 131 | 100  | 7-<br>HYDROXYETHYLTHEOPHY<br>LLINE |
| 225.154  | 224.127 | -0.0194 | 225.1346 | 127 | 94.7 | Pirimicarb-desmethyl               |
| 225.154  | 202.143 | -0.0218 | 225.1322 | 71  | 64   | NG,NG-Dimethyl-L-arginine          |
| 225.154  | 448.229 | -0.032  | 225.122  | 152 | 38.1 | His-His-Arg                        |
| 164.0069 | 163.046 | 0.0459  | 164.0528 | 47  | 45.6 | Benzothiazole, 2,5-dimethyl-       |
| 164.0069 | 163.046 | 0.0459  | 164.0528 | 53  | 100  | Benzothiazole, 2,5-dimethyl-       |
| 164.0069 | 163.046 | 0.0459  | 164.0528 | 88  | 100  | Benzothiazole, 2,5-dimethyl-       |
| 164.0069 | 163.046 | 0.0459  | 164.0528 | 86  | 64.5 | Benzothiazole, 2,5-dimethyl-       |
| 164.0069 | 163.046 | 0.0459  | 164.0528 | 51  | 55.9 | Benzothiazole, 2,5-dimethyl-       |
| 164.0069 | 163.038 | 0.0386  | 164.0455 | 31  | 51   | 7-Nitroindazole                    |
| 164.0069 | 163.038 | 0.0386  | 164.0455 | 2   | 100  | 7-Nitroindazole                    |
| 164.0069 | 163.046 | 0.0459  | 164.0528 | 80  | 74.8 | Benzothiazole, 2,5-dimethyl-       |
| 164.0069 | 163.046 | 0.0459  | 164.0528 | 137 | 91.4 | Benzothiazole, 2,5-dimethyl-       |
| 164.0069 | 163.046 | 0.0459  | 164.0528 | 79  | 100  | Benzothiazole, 2,5-dimethyl-       |
| 225.154  | 202.143 | -0.0218 | 225.1322 | 115 | 75.2 | NG,NG-Dimethyl-L-arginine          |
| 225.154  | 448.207 | -0.0432 | 225.1108 | 192 | 76   | PyroGlu-Tyr-Arg                    |
| 225.154  | 0       | 0       | 225.15   | 165 | 49.8 | Methyl jasmonate                   |
| 176.1257 | 350.195 | -0.021  | 176.105  | 44  | 100  | Phe-Gly-Lys                        |
| 225.1677 | 202.143 | -0.0355 | 225.1322 | 71  | 83.3 | N(G),N(G')-Dimethyl-L-<br>arginine |
| 225.1677 | 224.116 | -0.0443 | 225.1234 | 37  | 28.4 | Butalbital                         |
| 225.1677 | 448.229 | -0.046  | 225.122  | 86  | 44.9 | His-His-Arg                        |
| 225.1606 | 0       | -0.01   | 225.15   | 32  | 36.9 | Methyl jasmonate                   |
| 225.1606 | 448.229 | -0.039  | 225.122  | 194 | 49.3 | His-His-Arg                        |
| 225.1606 | 0       | -0.01   | 225.15   | 136 | 51.6 | Methyl jasmonate                   |
| 169.1299 | 168.115 | -0.0076 | 169.1223 | 39  | 100  | Jasmine lactone                    |
| 169.1299 | 168.115 | -0.0076 | 169.1223 | 116 | 75.3 | Jasmine lactone                    |
| 169.1299 | 168.09  | -0.0327 | 169.0972 | 65  | 82.7 | Pyridoxamine                       |
| 211.1441 | 210.126 | -0.0112 | 211.1329 | 262 | 81.6 | Jasmonic Acid                      |
| 211.1441 | 210.126 | -0.0112 | 211.1329 | 190 | 55.9 | Jasmonic Acid                      |
| 211.1441 | 210.126 | -0.0112 | 211.1329 | 115 | 28.3 | Jasmonic Acid                      |

|          |         |         |          |     |      |                                                    |
|----------|---------|---------|----------|-----|------|----------------------------------------------------|
| 211.1441 | 420.223 | -0.025  | 211.119  | 196 | 42.6 | His-His-Lys                                        |
| 205.1202 | 204.072 | -0.0408 | 205.0794 | 69  | 68.3 | Levamisole                                         |
| 205.1202 | 204.1   | -0.013  | 205.107  | 143 | 39.7 | 1,6-Anhydro-b-D-glucose, permethyl-                |
| 205.1202 | 204.09  | -0.023  | 205.0972 | 213 | 62.5 | Ethotoin                                           |
| 205.1202 | 204.075 | -0.0383 | 205.0819 | 174 | 73.3 | Gly-Glu                                            |
| 211.1441 | 228.136 | -0.0112 | 211.1329 | 100 | 66.5 | trans-Traumatic acid                               |
| 211.1441 | 210.126 | -0.0112 | 211.1329 | 72  | 60.9 | Jasmonic Acid                                      |
| 211.1441 | 210.126 | -0.0112 | 211.1329 | 143 | 48.5 | Jasmonic Acid                                      |
| 211.1441 | 420.223 | -0.025  | 211.119  | 176 | 70.1 | His-His-Lys                                        |
| 211.1441 | 228.136 | -0.0112 | 211.1329 | 19  | 27.3 | trans-Traumatic acid                               |
| 211.1441 | 210.126 | -0.0112 | 211.1329 | 173 | 74   | Jasmonic Acid                                      |
| 211.1441 | 210.1   | -0.0364 | 211.1077 | 161 | 81.7 | Aprobarbital                                       |
| 211.1441 | 210.126 | -0.0112 | 211.1329 | 128 | 35.7 | Jasmonic Acid                                      |
| 211.1441 | 210.159 | 0.0225  | 211.1666 | 11  | 100  | Altretamine                                        |
| 211.1441 | 210.126 | -0.0112 | 211.1329 | 104 | 42.2 | Jasmonic Acid                                      |
| 211.1441 | 0       | -0.01   | 211.13   | 129 | 27.7 | Jasmonic acid                                      |
| 211.1441 | 420.179 | -0.0473 | 211.0968 | 160 | 64.1 | Met-Asp-Arg                                        |
| 225.1606 | 448.207 | -0.0498 | 225.1108 | 52  | 28.9 | PyroGlu-Tyr-Arg                                    |
| 225.1606 | 448.207 | -0.0498 | 225.1108 | 75  | 83.8 | PyroGlu-Tyr-Arg                                    |
| 163.1028 | 162.126 | 0.0301  | 163.1329 | 206 | 94.2 | Ethanol, 2-(2-butoxyethoxy)-                       |
| 163.1028 | 180.063 | -0.0427 | 163.0601 | 85  | 33.5 | D-(+)-Galactose                                    |
| 163.1028 | 179.095 | -0.0274 | 163.0754 | 68  | 28.1 | 3-Amino-3-(4-methylphenyl)propionic acid           |
| 163.1028 | 162.1   | 0.0049  | 163.1077 | 3   | 50   | DL-Lysine, 5-hydroxy-                              |
| 164.0069 | 163.049 | 0.0498  | 164.0567 | 43  | 44.6 | Pterine                                            |
| 164.0069 | 163.046 | 0.0459  | 164.0528 | 46  | 40.1 | Benzothiazole, 2,5-dimethyl-                       |
| 164.0069 | 163.046 | 0.0459  | 164.0528 | 41  | 47.4 | Benzothiazole, 2,5-dimethyl-                       |
| 164.0069 | 163.046 | 0.0459  | 164.0528 | 49  | 70.2 | Benzothiazole, 2,5-dimethyl-                       |
| 164.0069 | 163     | 0.03    | 164.04   | 31  | 100  | N-Acetyl-L-cysteine                                |
| 164.0069 | 163.049 | 0.0498  | 164.0567 | 13  | 58.6 | Pterine                                            |
| 164.0069 | 163.046 | 0.0459  | 164.0528 | 75  | 52.9 | Benzothiazole, 2,5-dimethyl-                       |
| 164.0069 | 163.046 | 0.0459  | 164.0528 | 38  | 100  | Benzothiazole, 2,5-dimethyl-                       |
| 164.0069 | 163.038 | 0.0386  | 164.0455 | 4   | 100  | 7-Nitroindazole                                    |
| 164.0069 | 163.049 | 0.0498  | 164.0567 | 76  | 34.9 | Pterine                                            |
| 164.0069 | 163.046 | 0.0459  | 164.0528 | 127 | 89.9 | Benzothiazole, 2,5-dimethyl-                       |
| 164.0069 | 163.038 | 0.0386  | 164.0455 | 25  | 62.3 | 7-Nitroindazole                                    |
| 205.1202 | 204.075 | -0.0383 | 205.0819 | 42  | 57.6 | Gly-Glu                                            |
| 205.1202 | 204.09  | -0.023  | 205.0972 | 13  | 100  | Fenozolone                                         |
| 205.1202 | 204.072 | -0.0408 | 205.0794 | 103 | 68.4 | Tetramisole                                        |
| 205.1202 | 204.072 | -0.0408 | 205.0794 | 56  | 19.9 | Tetramisole                                        |
| 211.1441 | 228.136 | -0.0112 | 211.1329 | 32  | 43.8 | trans-Traumatic acid                               |
| 211.1441 | 0       | -0.01   | 211.13   | 69  | 66   | Jasmonic acid                                      |
| 289.1777 | 266.165 | -0.0238 | 289.1539 | 51  | 65.4 | Tributyl phosphate                                 |
| 180.0344 | 362.082 | -0.0008 | 180.0336 | 73  | 100  | Piperazine-N,N'-bis(2-hydroxypropanesulfonic acid) |
| 150.1003 | 149.084 | -0.009  | 150.0913 | 130 | 14.6 | S(-)-Cathinone                                     |

|          |         |         |          |     |      |                                              |
|----------|---------|---------|----------|-----|------|----------------------------------------------|
| 150.1003 | 167.095 | -0.009  | 150.0913 | 32  | 49.8 | Synephrine                                   |
| 289.1998 | 288.18  | -0.013  | 289.187  | 10  | 100  | Ala-Ala-Lys                                  |
| 164.0069 | 163.046 | 0.0459  | 164.0528 | 65  | 63.1 | Benzothiazole, 2,5-dimethyl-                 |
| 164.0069 | 165.065 | 0.0509  | 164.0578 | 4   | 100  | 1-Methylguanine                              |
| 164.0069 | 163.046 | 0.0459  | 164.0528 | 15  | 60   | Benzothiazole, 2,5-dimethyl-                 |
| 164.0069 | 163.046 | 0.0459  | 164.0528 | 76  | 77.4 | Benzothiazole, 2,5-dimethyl-                 |
| 164.0069 | 163.046 | 0.0459  | 164.0528 | 36  | 57.9 | Benzothiazole, 2,5-dimethyl-                 |
| 268.9982 | 432.106 | 0.0473  | 269.0455 | 1   | 100  | Genistin                                     |
| 164.0069 | 165.065 | 0.0509  | 164.0578 | 55  | 54.2 | 1-Methylguanine                              |
| 164.0069 | 163.046 | 0.0459  | 164.0528 | 26  | 100  | Benzothiazole, 2,5-dimethyl-                 |
| 289.1729 | 266.165 | -0.0189 | 289.1539 | 1   | 100  | Tributyl phosphate                           |
| 289.1729 | 288.209 | 0.0433  | 289.2162 | 34  | 60   | 9(11),(5.alpha.)-Androsten-3.beta.-ol-17-one |
| 289.1729 | 288.18  | 0.014   | 289.187  | 9   | 100  | Ala-Ala-Lys                                  |
| 205.1202 | 204.072 | -0.0408 | 205.0794 | 27  | 40.4 | Levamisole                                   |
| 205.1202 | 204.072 | -0.0408 | 205.0794 | 35  | 51   | Levamisole                                   |
| 205.1202 | 204.072 | -0.0408 | 205.0794 | 34  | 100  | Tetramisole                                  |
| 205.1202 | 204.1   | -0.013  | 205.107  | 73  | 75.3 | 1,6-Anhydro-b-D-glucose, permethyl-          |
| 164.0069 | 163.046 | 0.0459  | 164.0528 | 62  | 69.4 | Benzothiazole, 2,5-dimethyl-                 |
| 164.0069 | 163.046 | 0.0459  | 164.0528 | 120 | 92.5 | Benzothiazole, 2,5-dimethyl-                 |
| 289.1638 | 0       | -0.02   | 289.14   | 97  | 51   | 4-Methylumbelliferyl heptanoate              |
| 164.0069 | 163.046 | 0.0459  | 164.0528 | 34  | 78.2 | Benzothiazole, 2,5-dimethyl-                 |
| 164.0069 | 163.046 | 0.0459  | 164.0528 | 30  | 44   | Benzothiazole, 2,5-dimethyl-                 |
| 164.0069 | 163.046 | 0.0459  | 164.0528 | 57  | 63.7 | Benzothiazole, 2,5-dimethyl-                 |
| 164.0069 | 163.049 | 0.0498  | 164.0567 | 14  | 55.4 | Pterine                                      |
| 211.1441 | 210.126 | -0.0112 | 211.1329 | 84  | 67.4 | Jasmonic Acid                                |
| 211.1441 | 420.179 | -0.0473 | 211.0968 | 135 | 69.4 | Met-Asp-Arg                                  |
| 211.1441 | 0       | -0.04   | 211.1    | 76  | 33.2 | Sinapyl alcohol                              |
| 692.4407 | 1384    | 0.0165  | 692.4572 | 8   | 56   | GFLRRIRPKLK/2                                |
| 205.1375 | 204.09  | -0.0403 | 205.0972 | 1   | 100  | Fenozolone                                   |
| 205.1375 | 204     | -0.04   | 205.1    | 130 | 31.9 | L-Tryptophane                                |
| 205.1375 | 204.1   | -0.03   | 205.107  | 168 | 40.8 | 1,6-Anhydro-b-D-glucose, permethyl-          |
| 205.1375 | 204.1   | -0.03   | 205.107  | 80  | 81.2 | 1,6-Anhydro-b-D-glucose, permethyl-          |
| 164.0069 | 163.046 | 0.0459  | 164.0528 | 53  | 45.2 | Benzothiazole, 2,5-dimethyl-                 |
| 164.0069 | 163.049 | 0.0498  | 164.0567 | 12  | 100  | Pterine                                      |
| 164.0069 | 163.038 | 0.0386  | 164.0455 | 29  | 100  | 7-Nitroindazole                              |
| 150.1003 | 149.07  | -0.0229 | 150.0774 | 44  | 39.7 | Adenine, N6-methyl                           |
| 150.1003 | 149.07  | -0.0229 | 150.0774 | 27  | 100  | Adenine, N6-methyl                           |
| 149.1041 | 165.115 | -0.008  | 149.0961 | 18  | 100  | (.+/-)-p-Methoxyamphetamine                  |
| 149.1041 | 148.1   | 0.0032  | 149.1073 | 3   | 100  | N-Benzylacetamidine                          |
| 149.1041 | 148.1   | 0.0032  | 149.1073 | 9   | 57.9 | N-Benzylacetamidine                          |
| 164.0069 | 163.046 | 0.0459  | 164.0528 | 41  | 80.7 | Benzothiazole, 2,5-dimethyl-                 |

|          |         |         |          |     |      |                                                    |
|----------|---------|---------|----------|-----|------|----------------------------------------------------|
| 164.0069 | 165.065 | 0.0509  | 164.0578 | 101 | 84   | 1-Methylguanine                                    |
| 150.1003 | 149.07  | -0.0229 | 150.0774 | 63  | 32.5 | Adenine, N6-methyl                                 |
| 150.1003 | 167.058 | -0.045  | 150.055  | 17  | 45.9 | 3-Methyl-2-nitrobenzyl alcohol                     |
| 809.4807 | 1619    | 0.0292  | 809.5099 | 66  | 100  | YAGFLRRIRPKLK/2                                    |
| 809.4807 | 1619    | 0.0292  | 809.5099 | 3   | 100  | YAGFLRRIRPKLK/2                                    |
| 180.0344 | 181.041 | -0.0008 | 180.0336 | 3   | 100  | Acamprosate                                        |
| 180.0344 | 362.082 | -0.0008 | 180.0336 | 47  | 100  | Piperazine-N,N'-bis(2-hydroxypropanesulfonic acid) |
| 180.0344 | 362.082 | -0.0008 | 180.0336 | 99  | 80.9 | Piperazine-N,N'-bis(2-hydroxypropanesulfonic acid) |
| 180.0344 | 362.082 | -0.0008 | 180.0336 | 15  | 100  | Piperazine-N,N'-bis(2-hydroxypropanesulfonic acid) |
| 303.1743 | 302.138 | -0.0291 | 303.1452 | 25  | 55.4 | His-Phe                                            |
| 303.1743 | 0       | 0.03    | 303.2    | 49  | 100  | 11beta-hydroxyandrost-4-ene-3,17-dione             |
| 164.0069 | 165.065 | 0.0509  | 164.0578 | 22  | 60   | 1-Methylguanine                                    |
| 164.0069 | 163.046 | 0.0459  | 164.0528 | 30  | 41.9 | Benzothiazole, 2,5-dimethyl-                       |
| 164.0069 | 163.046 | 0.0459  | 164.0528 | 78  | 100  | Benzothiazole, 2,5-dimethyl-                       |
| 164.0069 | 163.046 | 0.0459  | 164.0528 | 58  | 57   | Benzothiazole, 2,5-dimethyl-                       |
| 164.0069 | 163.046 | 0.0459  | 164.0528 | 36  | 100  | Benzothiazole, 2,5-dimethyl-                       |
| 164.0069 | 163.046 | 0.0459  | 164.0528 | 37  | 100  | Benzothiazole, 2,5-dimethyl-                       |
| 164.0069 | 163.046 | 0.0459  | 164.0528 | 21  | 56   | Benzothiazole, 2,5-dimethyl-                       |
| 164.0069 | 163.046 | 0.0459  | 164.0528 | 9   | 52   | Benzothiazole, 2,5-dimethyl-                       |
| 164.0069 | 163.038 | 0.0386  | 164.0455 | 2   | 100  | 7-Nitroindazole                                    |
| 225.154  | 202.143 | -0.0218 | 225.1322 | 96  | 64.7 | N(G),N(G')-Dimethyl-L-arginine                     |
| 225.154  | 224.116 | -0.0306 | 225.1234 | 57  | 70.5 | Butalbital                                         |
| 211.1671 | 210.159 | -0.0005 | 211.1666 | 10  | 100  | Altretamine                                        |
| 211.1671 | 210.126 | -0.0342 | 211.1329 | 67  | 100  | Jasmonic Acid                                      |
| 134.0898 | 0       | -0.03   | 134.06   | 18  | 56   | Oxindole                                           |
| 211.1441 | 210.126 | -0.0112 | 211.1329 | 37  | 55.6 | Jasmonic Acid                                      |
| 211.1441 | 210.1   | -0.0364 | 211.1077 | 178 | 85.9 | Aprobarbital                                       |
| 180.0344 | 181.041 | -0.0008 | 180.0336 | 3   | 100  | Acamprosate                                        |
| 180.0344 | 157.074 | 0.0287  | 180.0631 | 2   | 100  | N-Tigloylglycine                                   |
| 180.0344 | 362.082 | -0.0008 | 180.0336 | 71  | 70.2 | Piperazine-N,N'-bis(2-hydroxypropanesulfonic acid) |
| 180.0344 | 362.082 | -0.0008 | 180.0336 | 97  | 57.9 | Piperazine-N,N'-bis(2-hydroxypropanesulfonic acid) |
| 743.4303 | 2973    | -0.0027 | 743.4276 | 1   | 100  | MLTKFETKSARVKGLSFHP<br>KRPWIL/4                    |
| 150.1003 | 149.12  | 0.0274  | 150.1277 | 111 | 70.6 | Methamphetamine                                    |
| 150.1003 | 167.095 | -0.009  | 150.0913 | 153 | 66.3 | Synephrine                                         |
| 180.0344 | 362.082 | -0.0008 | 180.0336 | 57  | 100  | Piperazine-N,N'-bis(2-hydroxypropanesulfonic acid) |
| 180.0344 | 362.082 | -0.0008 | 180.0336 | 108 | 81.2 | Piperazine-N,N'-bis(2-hydroxypropanesulfonic acid) |

|          |         |         |          |     |      |                                                      |
|----------|---------|---------|----------|-----|------|------------------------------------------------------|
| 205.1202 | 204.075 | -0.0383 | 205.0819 | 30  | 25.6 | Gly-Glu                                              |
| 205.1202 | 204.075 | -0.0383 | 205.0819 | 40  | 79.3 | Gly-Glu                                              |
| 205.1202 | 408.237 | 0.0057  | 205.1259 | 165 | 9.8  | Tyr-Val-Lys                                          |
| 205.1202 | 204.075 | -0.0383 | 205.0819 | 138 | 24.9 | Gly-Glu                                              |
| 150.1003 | 149.105 | 0.0122  | 150.1125 | 200 | 94.5 | Triethanolamine                                      |
| 150.1003 | 149.07  | -0.0229 | 150.0774 | 17  | 100  | Adenine, N6-methyl                                   |
| 787.6188 | 786.661 | 0.05    | 787.6688 | 43  | 100  | N-Docosanoyl-4-sphingeny-1-O-phosphorylcholine       |
| 164.0069 | 163.046 | 0.0459  | 164.0528 | 86  | 80.8 | Benzothiazole, 2,5-dimethyl-                         |
| 164.0069 | 163.049 | 0.0498  | 164.0567 | 67  | 66.7 | Pterine                                              |
| 164.0069 | 163.046 | 0.0459  | 164.0528 | 111 | 77.6 | Benzothiazole, 2,5-dimethyl-                         |
| 164.0069 | 163     | 0.03    | 164.04   | 63  | 42.3 | N-Acetyl-L-cysteine                                  |
| 164.0069 | 163.046 | 0.0459  | 164.0528 | 98  | 80.4 | Benzothiazole, 2,5-dimethyl-                         |
| 164.0069 | 163.046 | 0.0459  | 164.0528 | 42  | 65   | Benzothiazole, 2,5-dimethyl-                         |
| 164.0069 | 163.046 | 0.0459  | 164.0528 | 59  | 70.2 | Benzothiazole, 2,5-dimethyl-                         |
| 134.0931 | 151.1   | 0.0033  | 134.0964 | 3   | 100  | Norephedrine                                         |
| 134.0931 | 0       | -0.03   | 134.06   | 174 | 73.3 | Oxindole                                             |
| 134.0966 | 135     | -0.05   | 134.05   | 146 | 60.4 | Adenine                                              |
| 134.0966 | 0       | -0.04   | 134.06   | 230 | 73.2 | Oxindole                                             |
| 283.1685 | 282.179 | 0.0179  | 283.1864 | 10  | 100  | 1,3-Bis(tris(hydroxymethyl)methylamino)propane       |
| 283.1685 | 282.122 | -0.0396 | 283.1289 | 87  | 66.2 | Tyr-Thr                                              |
| 283.1685 | 282.179 | 0.0179  | 283.1864 | 14  | 58.6 | 1,3-Bis(tris(hydroxymethyl)methylamino)propane       |
| 211.1441 | 210.126 | -0.0112 | 211.1329 | 40  | 100  | Jasmonic Acid                                        |
| 211.1441 | 420.223 | -0.025  | 211.119  | 21  | 36.8 | His-His-Lys                                          |
| 205.1375 | 408.237 | -0.0116 | 205.1259 | 258 | 41.2 | Tyr-Val-Lys                                          |
| 205.1375 | 204.09  | -0.0403 | 205.0972 | 215 | 81.9 | Ethotoin                                             |
| 176.1125 | 175.063 | -0.0419 | 176.0706 | 9   | 100  | 3-Indoleacetic acid                                  |
| 211.1441 | 210.159 | 0.0225  | 211.1666 | 2   | 100  | Altretamine                                          |
| 211.1441 | 210.126 | -0.0112 | 211.1329 | 151 | 70.8 | Jasmonic Acid                                        |
| 211.1441 | 210.126 | -0.0112 | 211.1329 | 35  | 100  | Jasmonic Acid                                        |
| 205.1375 | 408.186 | -0.037  | 205.1005 | 77  | 100  | Met-Met-Lys                                          |
| 205.1375 | 204.09  | -0.0403 | 205.0972 | 63  | 100  | Fenozolone                                           |
| 150.1003 | 167.095 | -0.009  | 150.0913 | 31  | 100  | Synephrine                                           |
| 150.1003 | 149.12  | 0.0274  | 150.1277 | 259 | 74.4 | Methamphetamine                                      |
| 205.1375 | 204     | -0.04   | 205.1    | 74  | 28.7 | L-Tryptophane                                        |
| 205.1375 | 222.1   | -0.0403 | 205.0972 | 105 | 78.7 | Gly-Phe                                              |
| 205.1375 | 188.116 | -0.0181 | 205.1194 | 45  | 61.5 | Glycyl-L-norleucine                                  |
| 205.1375 | 408.237 | -0.0116 | 205.1259 | 110 | 12.5 | Tyr-Val-Lys                                          |
| 180.0344 | 181.041 | -0.0008 | 180.0336 | 18  | 100  | Acamprosate                                          |
| 238.1427 | 237.092 | -0.0434 | 238.0993 | 48  | 100  | Ketamine                                             |
| 238.1427 | 237.103 | -0.0319 | 238.1108 | 8   | 100  | 3-(Cyclohexylamino)-2-hydroxy-1-propanesulfonic acid |

|          |         |         |          |     |      |                                                      |
|----------|---------|---------|----------|-----|------|------------------------------------------------------|
| 238.1427 | 474.234 | -0.0185 | 238.1242 | 103 | 75.8 | Trp-Asn-Arg                                          |
| 163.1064 | 162.126 | 0.0264  | 163.1329 | 187 | 80.9 | Ethanol, 2-(2-butoxyethoxy)-                         |
| 163.1064 | 162.064 | -0.0351 | 163.0713 | 114 | 54   | Gly-Ser                                              |
| 163.1064 | 162.064 | -0.0351 | 163.0713 | 88  | 28.1 | Gly-Ser                                              |
| 257.1052 | 256.117 | 0.0192  | 257.1244 | 34  | 78.6 | Thr-His                                              |
| 164.0069 | 163.046 | 0.0459  | 164.0528 | 84  | 73.9 | Benzothiazole, 2,5-dimethyl-                         |
| 164.0069 | 163.046 | 0.0459  | 164.0528 | 71  | 83.5 | Benzothiazole, 2,5-dimethyl-                         |
| 164.0069 | 163.048 | 0.0484  | 164.0553 | 19  | 100  | 4-Hydroxy-L-glutamic acid                            |
| 164.0069 | 163.046 | 0.0459  | 164.0528 | 84  | 78.4 | Benzothiazole, 2,5-dimethyl-                         |
| 164.0069 | 163.046 | 0.0459  | 164.0528 | 67  | 100  | Benzothiazole, 2,5-dimethyl-                         |
| 164.0069 | 163.046 | 0.0459  | 164.0528 | 19  | 52   | Benzothiazole, 2,5-dimethyl-                         |
| 164.0069 | 163.046 | 0.0459  | 164.0528 | 37  | 51.8 | Benzothiazole, 2,5-dimethyl-                         |
| 164.0069 | 163.046 | 0.0459  | 164.0528 | 62  | 82.6 | Benzothiazole, 2,5-dimethyl-                         |
| 164.0069 | 163.046 | 0.0459  | 164.0528 | 36  | 100  | Benzothiazole, 2,5-dimethyl-                         |
| 164.0069 | 163.038 | 0.0386  | 164.0455 | 54  | 80.4 | 7-Nitroindazole                                      |
| 169.1048 | 168.115 | 0.0175  | 169.1223 | 22  | 33   | Jasmine lactone                                      |
| 169.1048 | 210.1   | -0.044  | 169.0608 | 45  | 25.1 | Aprobarbital                                         |
| 169.1048 | 336.147 | -0.0242 | 169.0806 | 24  | 57.3 | Ser-Cys-Lys                                          |
| 134.1137 | 0       | 0.01    | 134.12   | 41  | 56.7 | Bis (2-hydroxypropyl) amine                          |
| 134.1137 | 0       | -0.03   | 134.08   | 223 | 44.2 | 1,4-Dideoxy-1,4-Imino-D-Arabinitol                   |
| 134.1137 | 0       | -0.03   | 134.08   | 132 | 33.1 | 1,4-Dideoxy-1,4-Imino-D-Arabinitol                   |
| 134.1137 | 0       | -0.05   | 134.06   | 2   | 51   | 4-Hydroxyindole                                      |
| 169.1018 | 146.069 | -0.0434 | 169.0584 | 15  | 20.9 | Gly-Ala                                              |
| 169.1018 | 146.069 | -0.0434 | 169.0584 | 74  | 45.5 | Gly-Ala                                              |
| 169.1018 | 336.147 | -0.0212 | 169.0806 | 28  | 100  | Ser-Cys-Lys                                          |
| 169.1018 | 0       | -0.05   | 169.05   | 15  | 100  | p-Hydroxymandelic acid                               |
| 134.1002 | 151.1   | -0.0038 | 134.0964 | 25  | 21.7 | Norephedrine                                         |
| 134.1002 | 134.11  | 0.009   | 134.109  | 20  | 39.6 | Benzene, n-butyl-                                    |
| 150.1003 | 0       | -0.01   | 150.09   | 114 | 31.2 | 2-Aminopropiophenone                                 |
| 150.1003 | 149.12  | 0.0274  | 150.1277 | 148 | 60.9 | N,N-Diethylaniline                                   |
| 150.1003 | 149.105 | 0.0122  | 150.1125 | 213 | 71.8 | Triethanolamine                                      |
| 150.1003 | 167.095 | -0.009  | 150.0913 | 44  | 100  | Synephrine                                           |
| 134.1137 | 283.164 | -0.0375 | 134.0762 | 55  | 23   | Lys-His                                              |
| 134.1137 | 0       | -0.05   | 134.06   | 77  | 66   | Oxindole                                             |
| 134.1137 | 283.164 | -0.0375 | 134.0762 | 3   | 25.2 | Lys-His                                              |
| 238.1427 | 237.103 | -0.0319 | 238.1108 | 9   | 100  | 3-(Cyclohexylamino)-2-hydroxy-1-propanesulfonic acid |
| 238.1427 | 237.136 | 0.0011  | 238.1438 | 9   | 100  | Viloxazine                                           |
| 238.1427 | 237.092 | -0.0434 | 238.0993 | 13  | 54.2 | Ketamine                                             |
| 211.1548 | 210.126 | -0.0219 | 211.1329 | 56  | 53.6 | Jasmonic Acid                                        |
| 731.5822 | 730.599 | 0.024   | 731.6062 | 54  | 100  | N-Stearoyl-4-sphingeny-1-O-phosphorylcholine         |
| 150.1003 | 149.07  | -0.0229 | 150.0774 | 74  | 47.9 | Adenine, N6-methyl                                   |
| 150.1003 | 149.07  | -0.0229 | 150.0774 | 27  | 100  | Adenine, N6-methyl                                   |



|          |         |         |          |     |      |                                                           |
|----------|---------|---------|----------|-----|------|-----------------------------------------------------------|
| 150.1003 | 149.07  | -0.0229 | 150.0774 | 38  | 63.5 | Adenine, N6-methyl                                        |
| 150.1003 | 303.147 | -0.009  | 150.0913 | 32  | 68.7 | Cocaine                                                   |
| 164.0069 | 165.065 | 0.0509  | 164.0578 | 64  | 43.6 | 1-Methylguanine                                           |
| 164.0069 | 163.049 | 0.0498  | 164.0567 | 2   | 100  | Pterine                                                   |
| 164.0069 | 165.065 | 0.0509  | 164.0578 | 61  | 41   | 1-Methylguanine                                           |
| 164.0069 | 163.046 | 0.0459  | 164.0528 | 53  | 100  | Benzothiazole, 2,5-dimethyl-                              |
| 164.0069 | 163.046 | 0.0459  | 164.0528 | 76  | 100  | Benzothiazole, 2,5-dimethyl-                              |
| 164.0069 | 163.046 | 0.0459  | 164.0528 | 110 | 74.8 | Benzothiazole, 2,5-dimethyl-                              |
| 164.0069 | 163.046 | 0.0459  | 164.0528 | 43  | 100  | Benzothiazole, 2,5-dimethyl-                              |
| 164.0069 | 163     | 0.03    | 164.04   | 19  | 52   | N-Acetyl-L-cysteine                                       |
| 225.1606 | 448.229 | -0.039  | 225.122  | 114 | 36.3 | His-His-Arg                                               |
| 225.1606 | 0       | -0.01   | 225.15   | 102 | 58.6 | Methyl jasmonate                                          |
| 225.1606 | 0       | -0.01   | 225.15   | 96  | 55.4 | Methyl jasmonate                                          |
| 225.1606 | 0       | -0.01   | 225.15   | 58  | 100  | Methyl jasmonate                                          |
| 163.1064 | 162.064 | -0.0351 | 163.0713 | 103 | 68.4 | Gly-Ser                                                   |
| 163.1064 | 162.126 | 0.0264  | 163.1329 | 259 | 87.9 | Ethanol, 2-(2-butoxyethoxy)-                              |
| 163.1064 | 162.116 | 0.017   | 163.123  | 87  | 24.3 | Nicotine                                                  |
| 163.1064 | 162.126 | 0.0264  | 163.1329 | 99  | 42.1 | Ethanol, 2-(2-butoxyethoxy)-                              |
| 163.1028 | 162.064 | -0.0315 | 163.0713 | 70  | 71.5 | Gly-Ser                                                   |
| 163.1028 | 162.064 | -0.0315 | 163.0713 | 80  | 50.6 | Gly-Ser                                                   |
| 163.1028 | 162.126 | 0.0301  | 163.1329 | 123 | 68.7 | Ethanol, 2-(2-butoxyethoxy)-                              |
| 163.1028 | 179.095 | -0.0274 | 163.0754 | 27  | 25.5 | 3-Amino-3-(4-methylphenyl)propionic acid                  |
| 163.1064 | 162.064 | -0.0351 | 163.0713 | 129 | 64.4 | Gly-Ser                                                   |
| 163.1064 | 162.064 | -0.0351 | 163.0713 | 135 | 60.2 | Gly-Ser                                                   |
| 163.1064 | 162.064 | -0.0351 | 163.0713 | 56  | 34.8 | Gly-Ser                                                   |
| 163.1064 | 162.1   | 0.0013  | 163.1077 | 72  | 36.8 | DL-Lysine, 5-hydroxy-                                     |
| 134.1137 | 283.164 | -0.0375 | 134.0762 | 1   | 100  | Lys-His                                                   |
| 134.1137 | 0       | -0.05   | 134.06   | 90  | 54.2 | 4-Hydroxyindole                                           |
| 205.1202 | 204.072 | -0.0408 | 205.0794 | 10  | 56   | Levamisole                                                |
| 205.1202 | 204.09  | -0.023  | 205.0972 | 108 | 34.6 | Fenozolone                                                |
| 205.1202 | 204.09  | -0.023  | 205.0972 | 63  | 84.5 | Ethotoin                                                  |
| 205.1202 | 408.237 | 0.0057  | 205.1259 | 188 | 13.6 | Tyr-Val-Lys                                               |
| 266.1327 | 265.095 | -0.0304 | 266.1023 | 180 | 97.8 | 3,4-Dihydroxycinnamic acid (L-alanine methyl ester) amide |
| 266.1327 | 265.131 | 0.006   | 266.1387 | 16  | 58.6 | L-Phenylalanine, N-[(1,1-dimethylethoxy)carbonyl]-        |
| 266.1327 | 265.088 | -0.0369 | 266.0958 | 33  | 33.8 | Albendazole                                               |
| 266.1327 | 265.131 | 0.006   | 266.1387 | 39  | 32.6 | L-Phenylalanine, N-[(1,1-dimethylethoxy)carbonyl]-        |
| 169.1018 | 336.147 | -0.0212 | 169.0806 | 86  | 75.5 | Ser-Cys-Lys                                               |
| 169.1018 | 186.1   | -0.0046 | 169.0972 | 38  | 48.4 | Ala-Pro                                                   |
| 169.1018 | 186.1   | -0.0046 | 169.0972 | 16  | 26   | Ala-Pro                                                   |
| 169.1018 | 336.147 | -0.0212 | 169.0806 | 14  | 100  | Ser-Cys-Lys                                               |
| 134.1137 | 151.1   | -0.0173 | 134.0964 | 1   | 51   | Norephedrine                                              |
| 134.1137 | 283.164 | -0.0375 | 134.0762 | 15  | 100  | Lys-His                                                   |

|          |         |         |          |     |      |                                                         |
|----------|---------|---------|----------|-----|------|---------------------------------------------------------|
| 134.1137 | 0       | -0.05   | 134.06   | 152 | 35   | 4-Hydroxyindole                                         |
| 134.1137 | 151.1   | -0.0173 | 134.0964 | 52  | 35.1 | Norpseudoephedrine                                      |
| 257.1594 | 256.11  | -0.0422 | 257.1172 | 12  | 100  | Pterostilbene                                           |
| 163.1028 | 162.126 | 0.0301  | 163.1329 | 203 | 84.5 | Ethanol, 2-(2-butoxyethoxy)-                            |
| 163.1028 | 162.126 | 0.0301  | 163.1329 | 214 | 83.8 | Ethanol, 2-(2-butoxyethoxy)-                            |
| 163.1028 | 162.064 | -0.0315 | 163.0713 | 14  | 21.1 | Gly-Ser                                                 |
| 163.1028 | 179.095 | -0.0274 | 163.0754 | 31  | 23.9 | 3,4-Methylenedioxyamphetamine                           |
| 238.1255 | 237.103 | -0.0147 | 238.1108 | 55  | 100  | 3-(Cyclohexylamino)-2-hydroxy<br>1-propanesulfonic acid |
| 238.1255 | 237.092 | -0.0262 | 238.0993 | 72  | 66   | Ketamine                                                |
| 238.1255 | 237.1   | -0.0181 | 238.1074 | 88  | 53.2 | 3-Hydroxy carbofuran                                    |
| 164.0069 | 163.046 | 0.0459  | 164.0528 | 82  | 72.6 | Benzothiazole, 2,5-dimethyl-                            |
| 164.0069 | 163.046 | 0.0459  | 164.0528 | 120 | 75.3 | Benzothiazole, 2,5-dimethyl-                            |
| 164.0069 | 163     | 0.03    | 164.04   | 44  | 53.1 | N-Acetyl-L-cysteine                                     |
| 164.0069 | 163.046 | 0.0459  | 164.0528 | 108 | 87.6 | Benzothiazole, 2,5-dimethyl-                            |
| 164.0069 | 163.046 | 0.0459  | 164.0528 | 11  | 56.6 | Benzothiazole, 2,5-dimethyl-                            |
| 164.0069 | 163.048 | 0.0484  | 164.0553 | 93  | 100  | 4-Hydroxy-L-glutamic acid                               |
| 164.0069 | 163.046 | 0.0459  | 164.0528 | 87  | 53   | Benzothiazole, 2,5-dimethyl-                            |
| 164.0069 | 163.046 | 0.0459  | 164.0528 | 42  | 100  | Benzothiazole, 2,5-dimethyl-                            |
| 257.1488 | 128.059 | -0.0244 | 257.1244 | 28  | 100  | 5-Methyl-5,6-Dihydrouracil                              |
| 257.1488 | 256.117 | -0.0244 | 257.1244 | 113 | 24.4 | Thr-His                                                 |
| 266.1655 | 265.131 | -0.0268 | 266.1387 | 6   | 100  | L-Phenylalanine, N-[(1,1-dimethylethoxy)carbonyl]-      |
| 266.1655 | 265.131 | -0.0268 | 266.1387 | 23  | 100  | L-Phenylalanine, N-[(1,1-dimethylethoxy)carbonyl]-      |
| 134.0898 | 0       | -0.03   | 134.06   | 378 | 38.7 | Oxindole                                                |
| 134.0898 | 133.064 | -0.0185 | 134.0713 | 145 | 90.4 | 1H-Benzimidazol-2-amine                                 |
| 134.0898 | 0       | -0.03   | 134.06   | 293 | 89.1 | Oxindole                                                |
| 134.0898 | 0       | -0.03   | 134.06   | 39  | 35.2 | Oxindole                                                |
| 205.1202 | 204.075 | -0.0383 | 205.0819 | 128 | 100  | Gly-Glu                                                 |
| 205.1202 | 204.075 | -0.0383 | 205.0819 | 102 | 83.6 | Gly-Glu                                                 |
| 205.1202 | 204.09  | -0.023  | 205.0972 | 133 | 54.1 | Ethotoin                                                |
| 205.1202 | 204.075 | -0.0383 | 205.0819 | 163 | 72.5 | Gly-Glu                                                 |
| 205.1375 | 204.09  | -0.0403 | 205.0972 | 28  | 100  | Fenozolone                                              |
| 205.1375 | 188.116 | -0.0181 | 205.1194 | 117 | 91.4 | Glycyl-L-norleucine                                     |
| 205.1375 | 204.09  | -0.0403 | 205.0972 | 198 | 91   | L-Tryptophan                                            |
| 205.1375 | 408.237 | -0.0116 | 205.1259 | 185 | 44.7 | Tyr-Val-Lys                                             |
| 176.1041 | 175     | -0.03   | 176.07   | 15  | 100  | 1-Methoxy-3-carbaldehyde                                |
| 176.1041 | 175.048 | -0.0488 | 176.0553 | 98  | 61.5 | Dimethyloxallylglycine                                  |
| 238.1427 | 237.103 | -0.0319 | 238.1108 | 52  | 77.9 | 3-(Cyclohexylamino)-2-hydroxy<br>1-propanesulfonic acid |
| 238.1427 | 237.136 | 0.0011  | 238.1438 | 17  | 100  | Viloxazine                                              |

|          |         |         |          |     |      |                                                         |
|----------|---------|---------|----------|-----|------|---------------------------------------------------------|
| 283.1685 | 282.179 | 0.0179  | 283.1864 | 26  | 51   | 1,3-Bis(tris(hydroxymethyl)methylamino)propane          |
| 283.1685 | 282.122 | -0.0396 | 283.1289 | 47  | 47.3 | Thr-Tyr                                                 |
| 283.1685 | 282.179 | 0.0179  | 283.1864 | 157 | 100  | 1,3-Bis(tris(hydroxymethyl)methylamino)propane          |
| 283.1685 | 0       | -0.02   | 283.15   | 32  | 100  | Artemisinin                                             |
| 238.1427 | 237.092 | -0.0434 | 238.0993 | 59  | 81.7 | Ketamine                                                |
| 238.1427 | 237.103 | -0.0319 | 238.1108 | 9   | 100  | 3-(Cyclohexylamino)-2-hydroxy 1-propanesulfonic acid    |
| 238.1427 | 237.103 | -0.0319 | 238.1108 | 101 | 77.4 | 3-(Cyclohexylamino)-2-hydroxy 1-propanesulfonic acid    |
| 238.1427 | 237.103 | -0.0319 | 238.1108 | 144 | 100  | 3-(Cyclohexylamino)-2-hydroxy 1-propanesulfonic acid    |
| 205.1202 | 204.09  | -0.023  | 205.0972 | 50  | 100  | Fenozolone                                              |
| 205.1202 | 204.09  | -0.023  | 205.0972 | 72  | 100  | Fenozolone                                              |
| 205.1202 | 204.09  | -0.023  | 205.0972 | 150 | 31.1 | Ethotoin                                                |
| 238.1427 | 237.103 | -0.0319 | 238.1108 | 9   | 100  | 3-(Cyclohexylamino)-2-hydroxy 1-propanesulfonic acid    |
| 238.1427 | 0       | -0.05   | 238.09   | 34  | 77.9 | Biopterin                                               |
| 238.1427 | 0       | -0.04   | 238.1    | 233 | 77.2 | Mebendazole metabolite (2-Amino-5-benzoylbenzimidazole) |
| 238.1427 | 237.136 | 0.0011  | 238.1438 | 8   | 100  | Viloxazine                                              |
| 150.1003 | 169.074 | -0.0442 | 150.0561 | 154 | 85.4 | DL-Norepinephrine                                       |
| 150.1003 | 149.07  | -0.0229 | 150.0774 | 117 | 42.5 | Adenine, N6-methyl                                      |
| 150.1003 | 150.128 | 0.0274  | 150.1277 | 237 | 81.7 | N-Butyl-4-methylpyridinium                              |
| 150.1003 | 167.095 | -0.009  | 150.0913 | 21  | 53.1 | Synephrine                                              |
| 238.1311 | 237.103 | -0.0203 | 238.1108 | 74  | 67.9 | 3-(Cyclohexylamino)-2-hydroxy 1-propanesulfonic acid    |
| 238.1311 | 237.092 | -0.0318 | 238.0993 | 63  | 100  | Ketamine                                                |
| 238.1311 | 237.103 | -0.0203 | 238.1108 | 18  | 100  | 3-(Cyclohexylamino)-2-hydroxy 1-propanesulfonic acid    |
| 238.1311 | 237.103 | -0.0203 | 238.1108 | 102 | 100  | 3-(Cyclohexylamino)-2-hydroxy 1-propanesulfonic acid    |
| 176.1041 | 193.058 | -0.0494 | 176.0547 | 42  | 42.4 | S-(2-Boronoethyl)-L-cysteine                            |
| 211.1215 | 188.116 | -0.0162 | 211.1053 | 229 | 89.3 | L-Lysine, N2-acetyl-                                    |
| 211.1215 | 210.126 | 0.0114  | 211.1329 | 52  | 77.9 | Jasmonic Acid                                           |

|          |         |         |          |     |      |                                                             |
|----------|---------|---------|----------|-----|------|-------------------------------------------------------------|
| 211.1215 | 210.126 | 0.0114  | 211.1329 | 131 | 53.5 | Jasmonic Acid                                               |
| 164.0069 | 163.046 | 0.0459  | 164.0528 | 67  | 73.2 | Benzothiazole, 2,5-dimethyl-                                |
| 164.0069 | 163.049 | 0.0498  | 164.0567 | 76  | 71.2 | Pterine                                                     |
| 164.0069 | 163.038 | 0.0386  | 164.0455 | 27  | 100  | 7-Nitroindazole                                             |
| 164.0069 | 163.046 | 0.0459  | 164.0528 | 52  | 71.4 | Benzothiazole, 2,5-dimethyl-                                |
| 164.0069 | 163.046 | 0.0459  | 164.0528 | 100 | 100  | Benzothiazole, 2,5-dimethyl-                                |
| 164.0069 | 163     | 0.03    | 164.04   | 54  | 100  | N-Acetyl-L-cysteine                                         |
| 164.0069 | 163.038 | 0.0386  | 164.0455 | 34  | 100  | 7-Nitroindazole                                             |
| 164.0069 | 163.046 | 0.0459  | 164.0528 | 75  | 73.7 | Benzothiazole, 2,5-dimethyl-                                |
| 164.0069 | 0       | 0.03    | 164.04   | 107 | 71   | Acetylcysteine                                              |
| 164.0069 | 163.046 | 0.0459  | 164.0528 | 25  | 66   | Benzothiazole, 2,5-dimethyl-                                |
| 134.1096 | 0       | -0.05   | 134.06   | 190 | 74.8 | Oxindole                                                    |
| 134.1096 | 0       | -0.05   | 134.06   | 92  | 46.1 | 4-Hydroxyindole                                             |
| 134.1096 | 133.064 | -0.0383 | 134.0713 | 45  | 20.6 | 1H-Benzimidazol-2-amine                                     |
| 326.182  | 325.131 | -0.0433 | 326.1387 | 137 | 100  | 4-Hydroxycinnamic acid (L-phenylalanine methyl ester) amide |
| 211.1441 | 210.159 | 0.0225  | 211.1666 | 4   | 100  | Altretamine                                                 |
| 211.1441 | 210.116 | -0.021  | 211.123  | 6   | 100  | Naphtazoline                                                |
| 211.1441 | 0       | -0.01   | 211.13   | 200 | 47.2 | Jasmonic acid                                               |
| 211.1441 | 0       | -0.01   | 211.13   | 84  | 49.5 | Jasmonic acid                                               |
| 176.1257 | 175.121 | 0.0024  | 176.1281 | 14  | 100  | Threonine, butyl ester                                      |
| 176.1257 | 175.121 | 0.0024  | 176.1281 | 40  | 100  | Threonine, butyl ester                                      |
| 257.1488 | 256.117 | -0.0244 | 257.1244 | 82  | 71.9 | His-Thr                                                     |
| 257.1488 | 256.117 | -0.0244 | 257.1244 | 76  | 100  | Thr-His                                                     |
| 257.1488 | 256.117 | -0.0244 | 257.1244 | 90  | 50.9 | Thr-His                                                     |
| 211.1441 | 210.116 | -0.021  | 211.123  | 40  | 79.6 | Naphtazoline                                                |
| 211.1441 | 0       | -0.01   | 211.13   | 145 | 41   | Jasmonic acid                                               |
| 211.1441 | 210.126 | -0.0112 | 211.1329 | 174 | 24.6 | Jasmonic Acid                                               |
| 211.1441 | 0       | -0.01   | 211.13   | 19  | 36.1 | Jasmonic acid                                               |
| 176.1257 | 175.121 | 0.0024  | 176.1281 | 51  | 63.5 | Threonine, butyl ester                                      |
| 176.1257 | 175.121 | 0.0024  | 176.1281 | 2   | 100  | Threonine, butyl ester                                      |
| 149.0962 | 165.115 | -0.0001 | 149.0961 | 31  | 100  | (.+/-)-p-Methoxyamphetamine                                 |
| 149.0962 | 148.1   | 0.0111  | 149.1073 | 46  | 100  | N-Benzylacetamide                                           |
| 149.0908 | 148     | -0.05   | 149.04   | 90  | 100  | (S)-(+)-Citramalic acid                                     |
| 149.0908 | 166.063 | -0.0311 | 149.0597 | 173 | 23.8 | Tropic acid                                                 |
| 211.1441 | 210.116 | -0.021  | 211.123  | 49  | 81.9 | Naphtazoline                                                |
| 211.1441 | 210.126 | -0.0112 | 211.1329 | 221 | 71.4 | Jasmonic Acid                                               |
| 211.1441 | 420.223 | -0.025  | 211.119  | 56  | 29   | His-His-Lys                                                 |
| 211.1441 | 188.116 | -0.0388 | 211.1053 | 240 | 93.1 | L-Lysine, N2-acetyl-                                        |
| 211.1671 | 228.147 | -0.023  | 211.1441 | 59  | 33.8 | Ile-Pro                                                     |
| 211.1671 | 210.116 | -0.044  | 211.123  | 7   | 100  | Naphtazoline                                                |
| 211.1671 | 210.159 | -0.0005 | 211.1666 | 140 | 85   | Altretamine                                                 |
| 211.1671 | 210.126 | -0.0342 | 211.1329 | 66  | 45.5 | Jasmonic Acid                                               |

|          |         |         |          |     |      |                                                                 |
|----------|---------|---------|----------|-----|------|-----------------------------------------------------------------|
| 238.1427 | 237.103 | -0.0319 | 238.1108 | 16  | 100  | 3-(Cyclohexylamino)-2-hydroxy<br>1-propanesulfonic acid         |
| 238.1427 | 237.103 | -0.0319 | 238.1108 | 30  | 73.2 | 3-(Cyclohexylamino)-2-hydroxy<br>1-propanesulfonic acid         |
| 238.1427 | 0       | -0.04   | 238.1    | 106 | 78.4 | Mebendazole metabolite (2-<br>Amino-5-<br>benzoylbenzimidazole) |
| 238.1427 | 0       | -0.04   | 238.1    | 216 | 95.8 | Mebendazole metabolite (2-<br>Amino-5-<br>benzoylbenzimidazole) |
| 238.1427 | 237.103 | -0.0319 | 238.1108 | 45  | 100  | 3-(Cyclohexylamino)-2-hydroxy<br>1-propanesulfonic acid         |
| 238.1427 | 237.136 | 0.0011  | 238.1438 | 25  | 68.7 | Viloxazine                                                      |
| 238.1427 | 0       | -0.05   | 238.09   | 92  | 52.9 | Biopterin                                                       |
| 238.1427 | 0       | -0.04   | 238.1    | 259 | 66.2 | Mebendazole metabolite (2-<br>Amino-5-<br>benzoylbenzimidazole) |
| 257.1594 | 256.117 | -0.035  | 257.1244 | 101 | 78.2 | Thr-His                                                         |
| 257.1594 | 256.117 | -0.035  | 257.1244 | 45  | 100  | His-Thr                                                         |
| 164.0069 | 163.046 | 0.0459  | 164.0528 | 54  | 63.4 | Benzothiazole, 2,5-dimethyl-                                    |
| 164.0069 | 163.046 | 0.0459  | 164.0528 | 45  | 64.7 | Benzothiazole, 2,5-dimethyl-                                    |
| 164.0069 | 163.048 | 0.0484  | 164.0553 | 87  | 65.4 | 4-Hydroxy-L-glutamic acid                                       |
| 164.0069 | 163.046 | 0.0459  | 164.0528 | 118 | 71   | Benzothiazole, 2,5-dimethyl-                                    |
| 164.0069 | 163.048 | 0.0484  | 164.0553 | 83  | 100  | 4-Hydroxy-L-glutamic acid                                       |
| 164.0069 | 163.048 | 0.0484  | 164.0553 | 25  | 100  | 4-Hydroxy-L-glutamic acid                                       |
| 164.0069 | 163.049 | 0.0498  | 164.0567 | 13  | 100  | Pterine                                                         |
| 164.0069 | 163.046 | 0.0459  | 164.0528 | 72  | 63.8 | Benzothiazole, 2,5-dimethyl-                                    |
| 164.0069 | 163.049 | 0.0498  | 164.0567 | 108 | 100  | Pterine                                                         |
| 164.0069 | 163.038 | 0.0386  | 164.0455 | 35  | 76.6 | 7-Nitroindazole                                                 |
| 164.0069 | 163.046 | 0.0459  | 164.0528 | 78  | 76.9 | Benzothiazole, 2,5-dimethyl-                                    |
| 164.0069 | 163.046 | 0.0459  | 164.0528 | 37  | 100  | Benzothiazole, 2,5-dimethyl-                                    |
| 164.0069 | 163.049 | 0.0498  | 164.0567 | 39  | 79.9 | Pterine                                                         |
| 150.1003 | 150.053 | -0.0242 | 150.0761 | 99  | 42   | D-(-)-Ribose                                                    |
| 150.1003 | 167.095 | -0.009  | 150.0913 | 10  | 100  | Synephrine                                                      |
| 150.1003 | 149.07  | -0.0229 | 150.0774 | 49  | 51.8 | Adenine, N6-methyl                                              |
| 150.1003 | 149.07  | -0.0229 | 150.0774 | 46  | 100  | Adenine, N6-methyl                                              |
| 164.0069 | 163.046 | 0.0459  | 164.0528 | 61  | 41.8 | Benzothiazole, 2,5-dimethyl-                                    |
| 164.0069 | 163.046 | 0.0459  | 164.0528 | 27  | 73.2 | Benzothiazole, 2,5-dimethyl-                                    |
| 163.1231 | 162.064 | -0.0518 | 163.0713 | 23  | 42.7 | Gly-Ser                                                         |
| 163.1231 | 162.126 | 0.0098  | 163.1329 | 231 | 88.6 | Ethanol, 2-(2-butoxyethoxy)-                                    |
| 163.1231 | 162.126 | 0.0098  | 163.1329 | 103 | 21.3 | Ethanol, 2-(2-butoxyethoxy)-                                    |
| 163.1231 | 179.095 | -0.0477 | 163.0754 | 80  | 35.5 | 3,4-<br>Methylenedioxyamphetamine                               |
| 205.1202 | 204.09  | -0.023  | 205.0972 | 27  | 60   | Fenozolone                                                      |

|          |         |         |          |     |      |                                                         |
|----------|---------|---------|----------|-----|------|---------------------------------------------------------|
| 205.1202 | 408.237 | 0.0057  | 205.1259 | 200 | 15   | Tyr-Val-Lys                                             |
| 205.1202 | 408.201 | -0.0125 | 205.1077 | 132 | 13.6 | Phe-Asp-Lys                                             |
| 137.0611 | 136.039 | -0.0153 | 137.0458 | 24  | 70.2 | Allopurinol                                             |
| 137.0611 | 136.039 | -0.0153 | 137.0458 | 72  | 11.1 | Hypoxanthine                                            |
| 137.0611 | 154.027 | -0.0378 | 137.0233 | 14  | 52   | .beta.-Resorcylic acid                                  |
| 137.0611 | 0       | 0.01    | 137.07   | 115 | 29.6 | PRALIDOXIME                                             |
| 164.0069 | 163.046 | 0.0459  | 164.0528 | 84  | 62.9 | Benzothiazole, 2,5-dimethyl-                            |
| 164.0069 | 163.049 | 0.0498  | 164.0567 | 117 | 77.2 | Pterine                                                 |
| 149.1007 | 148.1   | 0.0066  | 149.1073 | 4   | 100  | N-Benzylacetamide                                       |
| 149.1007 | 148.1   | 0.0066  | 149.1073 | 61  | 73.2 | Normicotine                                             |
| 149.1007 | 150     | -0.05   | 149.05   | 130 | 62.8 | D-(-)-Arabinose                                         |
| 238.1427 | 237.092 | -0.0434 | 238.0993 | 33  | 37.8 | Ketamine                                                |
| 238.1427 | 237.092 | -0.0434 | 238.0993 | 91  | 72.3 | Ketamine                                                |
| 238.1427 | 474.234 | -0.0185 | 238.1242 | 48  | 32.1 | Trp-Asn-Arg                                             |
| 238.1427 | 0       | -0.04   | 238.1    | 260 | 64.3 | Mebendazole metabolite (2-Amino-5-benzoylbenzimidazole) |
| 205.1375 | 408.186 | -0.037  | 205.1005 | 143 | 95.1 | Met-Met-Lys                                             |
| 205.1375 | 204.1   | -0.03   | 205.107  | 4   | 100  | 1,6-Anhydro-b-D-glucose, permethyl-                     |
| 205.1375 | 204.09  | -0.0403 | 205.0972 | 109 | 29.3 | Fenozolone                                              |
| 205.1202 | 204.075 | -0.0383 | 205.0819 | 121 | 63.5 | Gly-Glu                                                 |
| 205.1202 | 204.09  | -0.023  | 205.0972 | 123 | 100  | Fenozolone                                              |
| 205.1202 | 408.201 | -0.0125 | 205.1077 | 88  | 70.5 | Phe-Asp-Lys                                             |
| 205.1202 | 408.186 | -0.0197 | 205.1005 | 88  | 39.2 | Met-Met-Lys                                             |
| 276.1945 | 275.159 | -0.0279 | 276.1666 | 56  | 37.5 | Thr-Arg                                                 |
| 276.1945 | 319.133 | -0.0438 | 276.1507 | 106 | 56   | Norfloxacin                                             |
| 276.1945 | 275.159 | -0.0279 | 276.1666 | 83  | 32.5 | Arg-Thr                                                 |
| 276.1945 | 319.133 | -0.0438 | 276.1507 | 84  | 55.9 | Norfloxacin                                             |
| 276.1945 | 319.133 | -0.0438 | 276.1507 | 86  | 58   | Norfloxacin                                             |
| 276.1945 | 275.152 | -0.0351 | 276.1594 | 102 | 50.3 | Homatropine                                             |
| 150.1003 | 150.128 | 0.0274  | 150.1277 | 187 | 77.6 | N-Butyl-4-methylpyridinium                              |
| 150.1003 | 167.095 | -0.009  | 150.0913 | 30  | 100  | Synephrine                                              |
| 150.1003 | 149.07  | -0.0229 | 150.0774 | 174 | 44   | Adenine, N6-methyl                                      |
| 238.1311 | 237.092 | -0.0318 | 238.0993 | 17  | 36   | Ketamine                                                |
| 238.1311 | 237.092 | -0.0318 | 238.0993 | 76  | 57.7 | Ketamine                                                |
| 238.1311 | 474.234 | -0.0069 | 238.1242 | 99  | 29.1 | His-Tyr-Arg                                             |
| 238.1311 | 474.234 | -0.0069 | 238.1242 | 67  | 100  | Trp-Asn-Arg                                             |
| 286.0528 | 285.067 | 0.0214  | 286.0742 | 80  | 100  | 7-Aminoclonazepam                                       |
| 647.333  | 0       | -0.01   | 647.32   | 65  | 100  | GARCINOLIC ACID                                         |
| 164.0069 | 163.046 | 0.0459  | 164.0528 | 50  | 81.2 | Benzothiazole, 2,5-dimethyl-                            |
| 164.0069 | 163.048 | 0.0484  | 164.0553 | 1   | 100  | 4-Hydroxy-L-glutamic acid                               |
| 164.0069 | 163.048 | 0.0484  | 164.0553 | 6   | 100  | 4-Hydroxy-L-glutamic acid                               |
| 164.0069 | 163.048 | 0.0484  | 164.0553 | 14  | 100  | 4-Hydroxy-L-glutamic acid                               |
| 164.0069 | 163.046 | 0.0459  | 164.0528 | 67  | 84.7 | Benzothiazole, 2,5-dimethyl-                            |
| 164.0069 | 163.048 | 0.0484  | 164.0553 | 4   | 100  | 4-Hydroxy-L-glutamic acid                               |
| 164.0069 | 163.048 | 0.0484  | 164.0553 | 6   | 100  | 4-Hydroxy-L-glutamic acid                               |

|          |         |         |          |     |      |                                          |
|----------|---------|---------|----------|-----|------|------------------------------------------|
| 164.0069 | 163.048 | 0.0484  | 164.0553 | 2   | 100  | 4-Hydroxy-L-glutamic acid                |
| 176.0975 | 175.084 | -0.0058 | 176.0917 | 33  | 30.9 | N-Carboxyethyl-.gamma.-aminobutyric acid |
| 176.0975 | 175.048 | -0.0422 | 176.0553 | 75  | 43.1 | N-Acetyl-L-aspartic acid                 |
| 176.0975 | 193.058 | -0.0428 | 176.0547 | 34  | 100  | S-(2-Boronoethyl)-L-cysteine             |
| 176.0975 | 175.084 | -0.0058 | 176.0917 | 45  | 42.4 | N-Carboxyethyl-.gamma.-aminobutyric acid |
| 164.0069 | 163.046 | 0.0459  | 164.0528 | 47  | 100  | Benzothiazole, 2,5-dimethyl-             |
| 164.0069 | 163.048 | 0.0484  | 164.0553 | 3   | 100  | 4-Hydroxy-L-glutamic acid                |
| 164.0069 | 163.048 | 0.0484  | 164.0553 | 1   | 100  | 4-Hydroxy-L-glutamic acid                |
| 164.0069 | 163.048 | 0.0484  | 164.0553 | 14  | 100  | 4-Hydroxy-L-glutamic acid                |
| 176.1125 | 175     | -0.04   | 176.07   | 61  | 54.2 | 1-Methoxy-3-carbaldehyde                 |
| 176.1125 | 350.195 | -0.007  | 176.105  | 16  | 100  | Gly-Phe-Lys                              |
| 176.1125 | 175.063 | -0.0419 | 176.0706 | 117 | 100  | 3-Indoleacetic acid                      |
| 211.1548 | 210.159 | 0.0118  | 211.1666 | 68  | 100  | Altretamine                              |
| 211.1548 | 188.116 | -0.0495 | 211.1053 | 14  | 100  | L-Lysine, N2-acetyl-                     |
| 211.1548 | 420.223 | -0.036  | 211.119  | 36  | 35.1 | His-His-Lys                              |
| 211.1548 | 0       | 0.02    | 211.17   | 103 | 28.8 | altretamine                              |
| 289.1861 | 288.209 | 0.0301  | 289.2162 | 100 | 63.1 | Epitestosterone                          |
| 289.1861 | 0       | 0.03    | 289.22   | 22  | 60   | trans-Dehydroandrosterone                |
| 150.1003 | 149     | -0.02   | 150.08   | 49  | 55.1 | 3-Methyladenine                          |
| 150.1003 | 303.147 | -0.009  | 150.0913 | 22  | 53.1 | Cocaine                                  |
| 150.1003 | 149     | -0.02   | 150.08   | 163 | 36.6 | 3-Methyladenine                          |
| 276.1945 | 275.159 | -0.0279 | 276.1666 | 41  | 31.8 | Thr-Arg                                  |
| 276.1945 | 275.159 | -0.0279 | 276.1666 | 45  | 35.6 | Thr-Arg                                  |
| 276.1945 | 275.152 | -0.0351 | 276.1594 | 134 | 88.5 | Methylenedioxyprovalerone                |
| 276.1945 | 275.159 | -0.0279 | 276.1666 | 95  | 43.9 | Thr-Arg                                  |
| 276.1945 | 275.163 | -0.0238 | 276.1707 | 165 | 90   | Physostigmine                            |
| 276.1945 | 319.133 | -0.0438 | 276.1507 | 80  | 100  | Norfloxacin                              |
| 276.1945 | 275.152 | -0.0351 | 276.1594 | 79  | 100  | Methylenedioxyprovalerone                |
| 150.1003 | 150.053 | -0.0242 | 150.0761 | 102 | 28.7 | DL-Arabinose                             |
| 150.1003 | 149.07  | -0.0229 | 150.0774 | 38  | 100  | Adenine, N6-methyl                       |
| 150.1003 | 149.07  | -0.0229 | 150.0774 | 61  | 100  | Adenine, N6-methyl                       |
| 150.1003 | 149.051 | -0.042  | 150.0583 | 8   | 100  | L-Methionine                             |
| 276.1945 | 319.133 | -0.0438 | 276.1507 | 87  | 51.7 | Norfloxacin                              |
| 276.1945 | 275.152 | -0.0351 | 276.1594 | 31  | 56.6 | 4-Hydroxypropranolol                     |
| 276.1945 | 275.159 | -0.0279 | 276.1666 | 102 | 91.4 | Arg-Thr                                  |
| 176.1195 | 175.121 | 0.0086  | 176.1281 | 33  | 100  | Threonine, butyl ester                   |
| 176.1195 | 175.084 | -0.0278 | 176.0917 | 10  | 51   | N-(tert-Butoxycarbonyl)glycine           |
| 176.1195 | 0       | -0.05   | 176.07   | 22  | 61.5 | Guanidinosuccinic Acid                   |
| 286.0474 | 285.067 | 0.0268  | 286.0742 | 112 | 100  | 7-Aminoclonazepam                        |
| 286.0474 | 285.067 | 0.0268  | 286.0742 | 63  | 100  | 7-Aminoclonazepam                        |
| 286.0474 | 285.067 | 0.0268  | 286.0742 | 73  | 100  | 7-Aminoclonazepam                        |
| 286.0474 | 285.067 | 0.0268  | 286.0742 | 49  | 100  | 7-Aminoclonazepam                        |
| 164.0069 | 163.046 | 0.0459  | 164.0528 | 49  | 82.6 | Benzothiazole, 2,5-dimethyl-             |

|          |         |         |          |     |      |                                                                                 |
|----------|---------|---------|----------|-----|------|---------------------------------------------------------------------------------|
| 164.0069 | 163.048 | 0.0484  | 164.0553 | 1   | 100  | 4-Hydroxy-L-glutamic acid                                                       |
| 164.0069 | 163.048 | 0.0484  | 164.0553 | 1   | 100  | 4-Hydroxy-L-glutamic acid                                                       |
| 164.0069 | 163.048 | 0.0484  | 164.0553 | 2   | 100  | 4-Hydroxy-L-glutamic acid                                                       |
| 164.0069 | 163.046 | 0.0459  | 164.0528 | 46  | 100  | Benzothiazole, 2,5-dimethyl-                                                    |
| 164.0069 | 163.048 | 0.0484  | 164.0553 | 4   | 100  | 4-Hydroxy-L-glutamic acid                                                       |
| 164.0069 | 163.048 | 0.0484  | 164.0553 | 3   | 100  | 4-Hydroxy-L-glutamic acid                                                       |
| 164.0069 | 163.048 | 0.0484  | 164.0553 | 22  | 100  | 4-Hydroxy-L-glutamic acid                                                       |
| 164.0069 | 163.046 | 0.0459  | 164.0528 | 45  | 81.7 | Benzothiazole, 2,5-dimethyl-                                                    |
| 164.0069 | 163.048 | 0.0484  | 164.0553 | 2   | 100  | 4-Hydroxy-L-glutamic acid                                                       |
| 164.0069 | 163.048 | 0.0484  | 164.0553 | 2   | 100  | 4-Hydroxy-L-glutamic acid                                                       |
| 164.0069 | 163.048 | 0.0484  | 164.0553 | 7   | 100  | 4-Hydroxy-L-glutamic acid                                                       |
| 169.1018 | 146.069 | -0.0434 | 169.0584 | 32  | 13.5 | Gly-Ala                                                                         |
| 169.1018 | 186.1   | -0.0046 | 169.0972 | 11  | 31.4 | Ala-Pro                                                                         |
| 169.1018 | 186.1   | -0.0046 | 169.0972 | 60  | 54.2 | Ala-Pro                                                                         |
| 169.1018 | 186.1   | -0.0046 | 169.0972 | 60  | 100  | Ala-Pro                                                                         |
| 176.0975 | 193.058 | -0.0428 | 176.0547 | 39  | 26.7 | S-(2-Boronoethyl)-L-cysteine                                                    |
| 176.0975 | 175.063 | -0.0269 | 176.0706 | 61  | 50   | 3-Indoleacetic acid                                                             |
| 176.0975 | 193.058 | -0.0428 | 176.0547 | 66  | 80.4 | S-(2-Boronoethyl)-L-cysteine                                                    |
| 287.247  | 286.193 | -0.0464 | 287.2006 | 110 | 35.3 | 4-Androsten-3,17-dione                                                          |
| 287.247  | 286.193 | -0.0464 | 287.2006 | 144 | 58.6 | 4-Androsten-3,17-dione                                                          |
| 591.2992 | 590.289 | -0.0026 | 591.2966 | 40  | 100  | Protoporphyrin IX dimethyl ester                                                |
| 205.1202 | 204.075 | -0.0383 | 205.0819 | 40  | 19.8 | Gly-Glu                                                                         |
| 205.1202 | 204.072 | -0.0408 | 205.0794 | 20  | 7.7  | Levamisole                                                                      |
| 205.1202 | 408.237 | 0.0057  | 205.1259 | 100 | 24.9 | Tyr-Val-Lys                                                                     |
| 276.1945 | 275.159 | -0.0279 | 276.1666 | 76  | 38.2 | Thr-Arg                                                                         |
| 276.1945 | 275.159 | -0.0279 | 276.1666 | 25  | 34.6 | Thr-Arg                                                                         |
| 276.1945 | 0       | -0.02   | 276.17   | 103 | 66.6 | cyclobenzaprine                                                                 |
| 276.1945 | 275.159 | -0.0279 | 276.1666 | 49  | 42.7 | Thr-Arg                                                                         |
| 225.1677 | 224.116 | -0.0443 | 225.1234 | 227 | 86.7 | Butalbital                                                                      |
| 225.1677 | 224.116 | -0.0443 | 225.1234 | 130 | 72.7 | Butalbital                                                                      |
| 225.1677 | 0       | -0.02   | 225.15   | 128 | 78.2 | Methyl jasmonate                                                                |
| 276.1945 | 258.183 | 0.0224  | 276.2169 | 102 | 37.2 | Tetradecanedioic acid                                                           |
| 276.1945 | 275.159 | -0.0279 | 276.1666 | 24  | 27.6 | Thr-Arg                                                                         |
| 276.1945 | 275.152 | -0.0351 | 276.1594 | 25  | 100  | 4-Hydroxypropranolol                                                            |
| 276.1945 | 275.148 | -0.0391 | 276.1554 | 49  | 45.5 | Glu-Lys                                                                         |
| 211.1113 | 210.116 | 0.012   | 211.123  | 14  | 100  | Naphtazoline                                                                    |
| 211.1113 | 0       | 0.02    | 211.13   | 81  | 55.5 | Jasmonic acid                                                                   |
| 211.1113 | 210     | 0.03    | 211.14   | 128 | 36.5 | Pyrrolo[1,2-a]pyrazine-1,4-dione, hexahydro-3-[(1S)-1-methylpropyl]-, (3S,8aS)- |
| 211.1113 | 420.179 | -0.0145 | 211.0968 | 84  | 39.9 | Met-Asp-Arg                                                                     |
| 266.1134 | 243.078 | -0.0465 | 266.0669 | 34  | 100  | 3-[N,N-Bis(2-hydroxyethyl)amino]-2-hydroxypropanesulfonic acid                  |



|          |         |         |          |     |      |                                                                |
|----------|---------|---------|----------|-----|------|----------------------------------------------------------------|
| 266.1134 | 243.078 | -0.0465 | 266.0669 | 35  | 100  | 3-[N,N-Bis(2-hydroxyethyl)amino]-2-hydroxypropanesulfonic acid |
| 176.1195 | 175     | -0.05   | 176.07   | 112 | 56   | 1-Methoxy-3-carbaldehyde                                       |
| 176.1195 | 175.121 | 0.0086  | 176.1281 | 6   | 100  | Threonine, butyl ester                                         |
| 176.1195 | 175.063 | -0.0489 | 176.0706 | 82  | 49.5 | 3-Indoleacetic acid                                            |
| 169.1084 | 73.053  | -0.0136 | 169.0948 | 168 | 90.5 | Formamide, N,N-dimethyl-                                       |
| 169.1084 | 186.1   | -0.0112 | 169.0972 | 59  | 47.4 | Ala-Pro                                                        |
| 169.1084 | 186.1   | -0.0112 | 169.0972 | 38  | 100  | Ala-Pro                                                        |
| 164.0069 | 163.046 | 0.0459  | 164.0528 | 50  | 100  | Benzothiazole, 2,5-dimethyl-                                   |
| 164.0069 | 163.048 | 0.0484  | 164.0553 | 2   | 100  | 4-Hydroxy-L-glutamic acid                                      |
| 164.0069 | 163.048 | 0.0484  | 164.0553 | 2   | 100  | 4-Hydroxy-L-glutamic acid                                      |
| 164.0069 | 163.048 | 0.0484  | 164.0553 | 10  | 100  | 4-Hydroxy-L-glutamic acid                                      |
| 164.0069 | 163.046 | 0.0459  | 164.0528 | 42  | 81.2 | Benzothiazole, 2,5-dimethyl-                                   |
| 164.0069 | 163.048 | 0.0484  | 164.0553 | 5   | 100  | 4-Hydroxy-L-glutamic acid                                      |
| 164.0069 | 163.048 | 0.0484  | 164.0553 | 1   | 100  | 4-Hydroxy-L-glutamic acid                                      |
| 164.0069 | 163.048 | 0.0484  | 164.0553 | 59  | 100  | 4-Hydroxy-L-glutamic acid                                      |
| 164.0069 | 163.046 | 0.0459  | 164.0528 | 48  | 82.2 | Benzothiazole, 2,5-dimethyl-                                   |
| 164.0069 | 163.048 | 0.0484  | 164.0553 | 3   | 100  | 4-Hydroxy-L-glutamic acid                                      |
| 164.0069 | 163.048 | 0.0484  | 164.0553 | 2   | 100  | 4-Hydroxy-L-glutamic acid                                      |
| 164.0069 | 163.048 | 0.0484  | 164.0553 | 8   | 100  | 4-Hydroxy-L-glutamic acid                                      |
| 176.1041 | 175     | -0.03   | 176.07   | 36  | 47   | 3-Indoleacetic acid                                            |
| 176.1041 | 193.058 | -0.0494 | 176.0547 | 12  | 52   | S-(2-Boronoethyl)-L-cysteine                                   |
| 176.1041 | 193.058 | -0.0494 | 176.0547 | 160 | 80.1 | S-(2-Boronoethyl)-L-cysteine                                   |
| 149.0962 | 148.052 | -0.0365 | 149.0597 | 177 | 76   | trans-Cinnamic acid                                            |
| 149.0962 | 148.052 | -0.0365 | 149.0597 | 190 | 57.4 | trans-Cinnamic acid                                            |
| 149.0962 | 165.115 | -0.0001 | 149.0961 | 39  | 100  | (.+/-)-p-Methoxyamphetamine                                    |
| 150.1003 | 167.095 | -0.009  | 150.0913 | 19  | 36.1 | Synephrine                                                     |
| 150.1003 | 167.095 | -0.009  | 150.0913 | 130 | 47.1 | Synephrine                                                     |
| 150.1003 | 303.147 | -0.009  | 150.0913 | 115 | 74.9 | Cocaine                                                        |
| 150.1003 | 149.07  | -0.0229 | 150.0774 | 122 | 61.3 | Adenine, N6-methyl                                             |
| 150.1003 | 167.095 | -0.009  | 150.0913 | 73  | 83.3 | Synephrine                                                     |
| 150.1003 | 149.07  | -0.0229 | 150.0774 | 53  | 78.2 | Adenine, N6-methyl                                             |
| 150.1003 | 167.058 | -0.045  | 150.055  | 50  | 45.9 | 3-Methyl-2-nitrobenzyl alcohol                                 |
| 211.1441 | 210.116 | -0.021  | 211.123  | 28  | 50   | Naphtazoline                                                   |
| 211.1441 | 210     | -0.01   | 211.13   | 90  | 37.1 | (+)-Jasmonic acid                                              |
| 211.1441 | 210.126 | -0.0112 | 211.1329 | 56  | 33.8 | Jasmonic Acid                                                  |
| 211.1441 | 210.126 | -0.0112 | 211.1329 | 10  | 100  | Jasmonic Acid                                                  |
| 276.1945 | 275.159 | -0.0279 | 276.1666 | 74  | 21.8 | Arg-Thr                                                        |
| 276.1945 | 275.152 | -0.0351 | 276.1594 | 51  | 52   | 4-Hydroxypropranolol                                           |
| 276.1945 | 319.133 | -0.0438 | 276.1507 | 20  | 100  | Norfloxacin                                                    |
| 276.1945 | 275.159 | -0.0279 | 276.1666 | 70  | 83   | Thr-Arg                                                        |
| 176.1257 | 175.096 | -0.023  | 176.103  | 5   | 100  | L-Citrulline                                                   |

|          |         |         |          |     |      |                                                         |
|----------|---------|---------|----------|-----|------|---------------------------------------------------------|
| 276.1945 | 275.159 | -0.0279 | 276.1666 | 62  | 23   | Thr-Arg                                                 |
| 276.1945 | 275.159 | -0.0279 | 276.1666 | 158 | 72.9 | Arg-Thr                                                 |
| 276.1945 | 275.152 | -0.0351 | 276.1594 | 53  | 56.6 | Homatropine                                             |
| 276.1945 | 258.183 | 0.0224  | 276.2169 | 71  | 35.5 | Tetradecanedioic acid                                   |
| 276.1945 | 275.159 | -0.0279 | 276.1666 | 20  | 59.3 | Thr-Arg                                                 |
| 276.1945 | 319.133 | -0.0438 | 276.1507 | 44  | 100  | Norfloxacin                                             |
| 276.1945 | 275.148 | -0.0391 | 276.1554 | 38  | 50.7 | .gamma.-L-Glu.-epsilon.-L-Lys                           |
| 238.1427 | 237.103 | -0.0319 | 238.1108 | 18  | 52   | 3-(Cyclohexylamino)-2-hydroxy<br>1-propanesulfonic acid |
| 238.1427 | 237.103 | -0.0319 | 238.1108 | 20  | 100  | 3-(Cyclohexylamino)-2-hydroxy<br>1-propanesulfonic acid |
| 238.1427 | 237.103 | -0.0319 | 238.1108 | 90  | 77.5 | 3-(Cyclohexylamino)-2-hydroxy<br>1-propanesulfonic acid |
| 238.1427 | 237.136 | 0.0011  | 238.1438 | 61  | 81.2 | Viloxazine                                              |
| 176.1041 | 0       | -0.03   | 176.07   | 114 | 21.2 | 3-Indoleacetic Acid                                     |
| 176.1041 | 175.063 | -0.0335 | 176.0706 | 4   | 100  | 3-Indoleacetic acid                                     |
| 176.1041 | 193.058 | -0.0494 | 176.0547 | 78  | 56.6 | S-(2-Boronoethyl)-L-cysteine                            |
| 176.1041 | 193.058 | -0.0494 | 176.0547 | 278 | 99   | S-(2-Boronoethyl)-L-cysteine                            |
| 327.2164 | 326.199 | -0.0097 | 327.2067 | 33  | 55.4 | Hydroquinidine                                          |
| 327.2164 | 326.199 | -0.0097 | 327.2067 | 48  | 60.8 | Hydroquinidine                                          |
| 164.0069 | 163.046 | 0.0459  | 164.0528 | 45  | 100  | Benzothiazole, 2,5-dimethyl-                            |
| 164.0069 | 163.048 | 0.0484  | 164.0553 | 3   | 100  | 4-Hydroxy-L-glutamic acid                               |
| 164.0069 | 163.048 | 0.0484  | 164.0553 | 3   | 100  | 4-Hydroxy-L-glutamic acid                               |
| 164.0069 | 163.048 | 0.0484  | 164.0553 | 5   | 100  | 4-Hydroxy-L-glutamic acid                               |
| 164.0069 | 163.046 | 0.0459  | 164.0528 | 57  | 83   | Benzothiazole, 2,5-dimethyl-                            |
| 164.0069 | 163.049 | 0.0498  | 164.0567 | 9   | 56.6 | Pterine                                                 |
| 164.0069 | 163.048 | 0.0484  | 164.0553 | 3   | 100  | 4-Hydroxy-L-glutamic acid                               |
| 164.0069 | 163.046 | 0.0459  | 164.0528 | 53  | 83   | Benzothiazole, 2,5-dimethyl-                            |
| 164.0069 | 163.048 | 0.0484  | 164.0553 | 5   | 100  | 4-Hydroxy-L-glutamic acid                               |
| 164.0069 | 163.048 | 0.0484  | 164.0553 | 2   | 100  | 4-Hydroxy-L-glutamic acid                               |
| 164.0069 | 163.049 | 0.0498  | 164.0567 | 19  | 100  | Pterine                                                 |
| 289.1638 | 288.114 | -0.0424 | 289.1214 | 137 | 82.5 | Myclobutanil                                            |
| 289.1638 | 288.114 | -0.0423 | 289.1215 | 72  | 100  | Myclobutanil                                            |
| 150.1003 | 167.095 | -0.009  | 150.0913 | 25  | 67.3 | Synephrine                                              |
| 150.1003 | 149.07  | -0.0229 | 150.0774 | 39  | 100  | Adenine, N6-methyl                                      |
| 150.1003 | 149.105 | 0.0122  | 150.1125 | 204 | 69.2 | Triethanolamine                                         |
| 150.1003 | 150.128 | 0.0274  | 150.1277 | 239 | 81.4 | N-Butyl-4-methylpyridinium                              |
| 150.1003 | 149.07  | -0.0229 | 150.0774 | 95  | 74.5 | Adenine, N6-methyl                                      |
| 150.1003 | 149.07  | -0.0229 | 150.0774 | 248 | 54.3 | Adenine, N6-methyl                                      |
| 150.1003 | 167.058 | -0.045  | 150.055  | 84  | 73.2 | 3-Methyl-2-nitrobenzyl alcohol                          |

|          |         |         |          |     |      |                                                      |
|----------|---------|---------|----------|-----|------|------------------------------------------------------|
| 150.1003 | 149.07  | -0.0229 | 150.0774 | 197 | 83.2 | Adenine, N6-methyl                                   |
| 150.1003 | 303.147 | -0.009  | 150.0913 | 141 | 56   | Cocaine                                              |
| 150.1003 | 149.07  | -0.0229 | 150.0774 | 38  | 62.3 | Adenine, N6-methyl                                   |
| 150.1003 | 149.12  | 0.0274  | 150.1277 | 137 | 56.1 | Methamphetamine                                      |
| 569.3045 | 1138    | 0.0342  | 569.3387 | 10  | 100  | YGGFLRRIR/2                                          |
| 150.1003 | 149.084 | -0.009  | 150.0913 | 86  | 16.4 | S(-)-Cathinone                                       |
| 150.1003 | 167.095 | -0.009  | 150.0913 | 127 | 92   | Synephrine                                           |
| 150.1003 | 149.105 | 0.0122  | 150.1125 | 122 | 47.5 | Triethanolamine                                      |
| 150.1003 | 149.07  | -0.0229 | 150.0774 | 2   | 100  | Adenine, N6-methyl                                   |
| 276.1778 | 319.133 | -0.0271 | 276.1507 | 86  | 78.9 | Norfloxacin                                          |
| 276.1778 | 319.133 | -0.0271 | 276.1507 | 30  | 100  | Norfloxacin                                          |
| 276.1778 | 275.148 | -0.0224 | 276.1554 | 75  | 38.4 | Glu-Lys                                              |
| 176.1195 | 175.084 | -0.0278 | 176.0917 | 22  | 100  | N-Carboxyethyl-.gamma.-aminobutyric acid             |
| 176.1195 | 175.121 | 0.0086  | 176.1281 | 63  | 57.3 | Threonine, butyl ester                               |
| 176.1195 | 175.084 | -0.0278 | 176.0917 | 61  | 47.6 | N-Carboxyethyl-.gamma.-aminobutyric acid             |
| 276.1945 | 275.159 | -0.0279 | 276.1666 | 45  | 36.2 | Thr-Arg                                              |
| 276.1945 | 319.133 | -0.0438 | 276.1507 | 56  | 62.3 | Norfloxacin                                          |
| 276.1945 | 275.152 | -0.0351 | 276.1594 | 42  | 100  | 4-Hydroxypropranolol                                 |
| 257.1488 | 274.128 | -0.0244 | 257.1244 | 86  | 71.1 | Gln-Gln                                              |
| 257.1488 | 256.117 | -0.0244 | 257.1244 | 31  | 100  | Thr-His                                              |
| 257.1488 | 256.117 | -0.0244 | 257.1244 | 110 | 65   | His-Thr                                              |
| 176.1298 | 175.096 | -0.027  | 176.103  | 23  | 100  | L-Citrulline                                         |
| 176.1298 | 175.084 | -0.0381 | 176.0917 | 26  | 100  | N-Carboxyethyl-.gamma.-aminobutyric acid             |
| 238.1427 | 237.092 | -0.0434 | 238.0993 | 91  | 89.1 | Ketamine                                             |
| 238.1427 | 474.234 | -0.0185 | 238.1242 | 31  | 31.5 | Trp-Asn-Arg                                          |
| 238.1427 | 237.103 | -0.0319 | 238.1108 | 167 | 100  | 3-(Cyclohexylamino)-2-hydroxy-1-propanesulfonic acid |
| 238.1427 | 474.234 | -0.0185 | 238.1242 | 109 | 20.7 | His-Tyr-Arg                                          |
| 164.0069 | 163.046 | 0.0459  | 164.0528 | 80  | 86.8 | Benzothiazole, 2,5-dimethyl-                         |
| 164.0069 | 163.049 | 0.0498  | 164.0567 | 11  | 55.4 | Pterine                                              |
| 164.0069 | 163.048 | 0.0484  | 164.0553 | 19  | 100  | 4-Hydroxy-L-glutamic acid                            |
| 164.0069 | 163.038 | 0.0386  | 164.0455 | 34  | 100  | 7-Nitroindazole                                      |
| 164.0069 | 163.046 | 0.0459  | 164.0528 | 55  | 82.6 | Benzothiazole, 2,5-dimethyl-                         |
| 164.0069 | 163.046 | 0.0459  | 164.0528 | 28  | 76.9 | Benzothiazole, 2,5-dimethyl-                         |
| 164.0069 | 163.048 | 0.0484  | 164.0553 | 30  | 100  | 4-Hydroxy-L-glutamic acid                            |
| 164.0069 | 163.046 | 0.0459  | 164.0528 | 59  | 83.8 | Benzothiazole, 2,5-dimethyl-                         |
| 164.0069 | 163.049 | 0.0498  | 164.0567 | 28  | 57.3 | Pterine                                              |
| 164.0069 | 163.048 | 0.0484  | 164.0553 | 1   | 100  | 4-Hydroxy-L-glutamic acid                            |
| 164.0069 | 163.038 | 0.0386  | 164.0455 | 28  | 100  | 7-Nitroindazole                                      |
| 205.1202 | 408.201 | -0.0125 | 205.1077 | 20  | 16.5 | Phe-Asp-Lys                                          |
| 205.1202 | 0       | -0.04   | 205.08   | 102 | 33.9 | Levamisole                                           |
| 205.1202 | 204.09  | -0.023  | 205.0972 | 164 | 22.1 | Fenozolone                                           |
| 205.1202 | 204.072 | -0.0408 | 205.0794 | 156 | 21   | Levamisole                                           |

|          |         |         |          |     |      |                                     |
|----------|---------|---------|----------|-----|------|-------------------------------------|
| 205.1202 | 204.075 | -0.0383 | 205.0819 | 25  | 12.4 | Gly-Glu                             |
| 205.1202 | 204.075 | -0.0383 | 205.0819 | 67  | 22.4 | Gly-Glu                             |
| 205.1202 | 204.075 | -0.0383 | 205.0819 | 81  | 14.5 | Gly-Glu                             |
| 205.1202 | 204.075 | -0.0383 | 205.0819 | 113 | 12.4 | Gly-Glu                             |
| 164.0069 | 163.046 | 0.0459  | 164.0528 | 39  | 100  | Benzothiazole, 2,5-dimethyl-        |
| 164.0069 | 163.048 | 0.0484  | 164.0553 | 16  | 57.3 | 4-Hydroxy-L-glutamic acid           |
| 164.0069 | 163.048 | 0.0484  | 164.0553 | 15  | 100  | 4-Hydroxy-L-glutamic acid           |
| 164.0069 | 163.048 | 0.0484  | 164.0553 | 26  | 100  | 4-Hydroxy-L-glutamic acid           |
| 257.1279 | 128.059 | -0.0035 | 257.1244 | 30  | 100  | 5-Methyl-5,6-Dihydrouracil          |
| 257.1279 | 256.117 | -0.0035 | 257.1244 | 114 | 37.5 | His-Thr                             |
| 205.1375 | 204     | -0.04   | 205.1    | 90  | 34   | L-Tryptophane                       |
| 205.1375 | 188.116 | -0.0181 | 205.1194 | 120 | 69   | Glycyl-L-norleucine                 |
| 205.1375 | 204.1   | -0.03   | 205.107  | 175 | 42.6 | 1,6-Anhydro-b-D-glucose, permethyl- |
| 205.1375 | 408.237 | -0.0116 | 205.1259 | 91  | 10.9 | Tyr-Val-Lys                         |
| 169.1265 | 168.115 | -0.0042 | 169.1223 | 45  | 100  | Jasmine lactone                     |
| 169.1265 | 186.1   | -0.0293 | 169.0972 | 63  | 44.7 | Ala-Pro                             |
| 169.1265 | 186.1   | -0.0293 | 169.0972 | 83  | 77.8 | Ala-Pro                             |
| 169.1265 | 186.1   | -0.0293 | 169.0972 | 78  | 71.8 | Ala-Pro                             |
| 134.0898 | 116.011 | -0.045  | 134.0448 | 82  | 29.5 | Maleic acid                         |
| 134.0898 | 134.11  | 0.019   | 134.109  | 228 | 57.3 | Benzene, n-butyl-                   |
| 134.0898 | 283.164 | -0.0136 | 134.0762 | 62  | 53.1 | Lys-His                             |
| 134.0898 | 0       | -0.01   | 134.08   | 36  | 27.4 | 1,4-Dideoxy-1,4-Imino-D-Arabinitol  |
| 169.0986 | 146.069 | -0.0402 | 169.0584 | 77  | 18.1 | Gly-Ala                             |
| 169.0986 | 336.147 | -0.018  | 169.0806 | 185 | 75.7 | Ser-Cys-Lys                         |
| 169.0986 | 186.1   | -0.0014 | 169.0972 | 89  | 73.2 | Ala-Pro                             |
| 169.1018 | 146.069 | -0.0434 | 169.0584 | 81  | 40.5 | Gly-Ala                             |
| 169.1018 | 168.115 | 0.0205  | 169.1223 | 63  | 49.8 | Jasmine lactone                     |
| 169.1018 | 186.1   | -0.0046 | 169.0972 | 108 | 82.2 | Ala-Pro                             |
| 169.1018 | 186.1   | -0.0046 | 169.0972 | 80  | 62.9 | Ala-Pro                             |
| 276.1945 | 319.133 | -0.0438 | 276.1507 | 97  | 59.6 | Norfloxacin                         |
| 276.1945 | 319.133 | -0.0438 | 276.1507 | 23  | 100  | Norfloxacin                         |
| 276.1945 | 275.152 | -0.0351 | 276.1594 | 92  | 85.9 | Homatropine                         |
| 169.1115 | 168.115 | 0.0108  | 169.1223 | 48  | 31.1 | Jasmine lactone                     |
| 169.1115 | 186.1   | -0.0143 | 169.0972 | 86  | 67.9 | Ala-Pro                             |
| 169.1115 | 186.1   | -0.0143 | 169.0972 | 95  | 100  | Ala-Pro                             |
| 169.1115 | 186.1   | -0.0143 | 169.0972 | 35  | 79.6 | Ala-Pro                             |
| 276.1945 | 275.163 | -0.0238 | 276.1707 | 147 | 88.8 | Physostigmine                       |
| 276.1945 | 319.133 | -0.0438 | 276.1507 | 37  | 51   | Norfloxacin                         |
| 276.1945 | 319.133 | -0.0438 | 276.1507 | 47  | 100  | Norfloxacin                         |
| 276.1945 | 319.133 | -0.0438 | 276.1507 | 93  | 39.3 | Norfloxacin                         |
| 276.1945 | 319.133 | -0.0438 | 276.1507 | 59  | 100  | Norfloxacin                         |
| 276.1945 | 275.152 | -0.0351 | 276.1594 | 104 | 78.2 | 4-Hydroxypropranolol                |
| 276.1945 | 319.133 | -0.0438 | 276.1507 | 7   | 100  | Norfloxacin                         |
| 276.1945 | 275.148 | -0.0391 | 276.1554 | 108 | 56.9 | Glu-Lys                             |
| 276.1945 | 275.159 | -0.0279 | 276.1666 | 26  | 73.2 | Thr-Arg                             |

|          |         |         |          |     |      |                                                         |
|----------|---------|---------|----------|-----|------|---------------------------------------------------------|
| 276.1945 | 275.159 | -0.0279 | 276.1666 | 123 | 57.6 | Thr-Arg                                                 |
| 276.1945 | 275.152 | -0.0351 | 276.1594 | 90  | 57.8 | 4-Hydroxypropranolol                                    |
| 164.0069 | 163.046 | 0.0459  | 164.0528 | 51  | 100  | Benzothiazole, 2,5-dimethyl-                            |
| 164.0069 | 163.046 | 0.0459  | 164.0528 | 52  | 100  | Benzothiazole, 2,5-dimethyl-                            |
| 164.0069 | 163.049 | 0.0498  | 164.0567 | 31  | 56.6 | Pterine                                                 |
| 164.0069 | 163.049 | 0.0498  | 164.0567 | 40  | 100  | Pterine                                                 |
| 164.0069 | 163.046 | 0.0459  | 164.0528 | 51  | 70.6 | Benzothiazole, 2,5-dimethyl-                            |
| 164.0069 | 163.046 | 0.0459  | 164.0528 | 6   | 100  | Benzothiazole, 2,5-dimethyl-                            |
| 164.0069 | 163.049 | 0.0498  | 164.0567 | 59  | 100  | Pterine                                                 |
| 276.1945 | 275.159 | -0.0279 | 276.1666 | 55  | 51.2 | Arg-Thr                                                 |
| 276.1945 | 275.159 | -0.0279 | 276.1666 | 85  | 56   | Arg-Thr                                                 |
| 276.1945 | 319.133 | -0.0438 | 276.1507 | 53  | 100  | Norfloxacin                                             |
| 248.1168 | 498.175 | -0.04   | 248.08   | 10  | 100  | Benzenesulfonic acid,<br>dodecyl(sulfophenoxy)-         |
| 238.1427 | 237.092 | -0.0434 | 238.0993 | 42  | 80.4 | Ketamine                                                |
| 238.1427 | 0       | -0.05   | 238.09   | 54  | 41.1 | Biopterin                                               |
| 238.1427 | 474.234 | -0.0185 | 238.1242 | 128 | 37.1 | Tyr-His-Arg                                             |
| 238.1427 | 474.234 | -0.0185 | 238.1242 | 66  | 25.2 | Tyr-His-Arg                                             |
| 163.1209 | 162.116 | 0.002   | 163.123  | 30  | 35.1 | Anabasine                                               |
| 163.1209 | 162.126 | 0.0119  | 163.1329 | 74  | 22.3 | Ethanol, 2-(2-butoxyethoxy)-                            |
| 163.1209 | 162     | -0.01   | 163.11   | 156 | 46.4 | DL-5-Hydroxylysine<br>hydrochloride                     |
| 163.1209 | 162     | -0.01   | 163.11   | 53  | 61.3 | DL-5-Hydroxylysine<br>hydrochloride                     |
| 257.1488 | 256.117 | -0.0244 | 257.1244 | 144 | 67.9 | Thr-His                                                 |
| 257.1488 | 256.117 | -0.0244 | 257.1244 | 218 | 60.1 | His-Thr                                                 |
| 257.1488 | 256.117 | -0.0244 | 257.1244 | 212 | 50.5 | His-Thr                                                 |
| 257.1488 | 256.11  | -0.0316 | 257.1172 | 36  | 100  | Pterostilbene                                           |
| 134.0966 | 134.11  | 0.012   | 134.109  | 92  | 56.4 | Benzene, n-butyl-                                       |
| 134.0966 | 0       | -0.04   | 134.06   | 62  | 29.8 | Oxindole                                                |
| 134.0966 | 283.164 | -0.0204 | 134.0762 | 43  | 100  | Lys-His                                                 |
| 134.0966 | 0       | -0.04   | 134.06   | 202 | 73.5 | Oxindole                                                |
| 257.1488 | 256.11  | -0.0316 | 257.1172 | 40  | 100  | Pterostilbene                                           |
| 257.1488 | 256.117 | -0.0244 | 257.1244 | 92  | 79.6 | Thr-His                                                 |
| 257.1488 | 256.117 | -0.0244 | 257.1244 | 94  | 55.4 | Thr-His                                                 |
| 238.1311 | 237.103 | -0.0203 | 238.1108 | 19  | 38.4 | 3-(Cyclohexylamino)-2-hydroxy<br>1-propanesulfonic acid |
| 238.1311 | 237.136 | 0.0127  | 238.1438 | 18  | 57.9 | Viloxazine                                              |
| 238.1311 | 474.234 | -0.0069 | 238.1242 | 73  | 43.6 | His-Tyr-Arg                                             |
| 211.1113 | 188.116 | -0.006  | 211.1053 | 39  | 39.3 | Ile-Gly                                                 |
| 211.1113 | 188.116 | -0.006  | 211.1053 | 279 | 95.7 | L-Lysine, N2-acetyl-                                    |
| 211.1113 | 420.223 | 0.008   | 211.119  | 64  | 38   | His-His-Lys                                             |
| 211.1113 | 210.1   | -0.0036 | 211.1077 | 232 | 71.5 | Aprobarbital                                            |
| 238.1427 | 215.116 | -0.038  | 238.105  | 9   | 55.4 | L-Proline, N-[(1,1-<br>dimethylethoxy)carbonyl]-        |

|          |         |         |          |     |      |                                                         |
|----------|---------|---------|----------|-----|------|---------------------------------------------------------|
| 238.1427 | 237.103 | -0.0319 | 238.1108 | 125 | 60   | 3-(Cyclohexylamino)-2-hydroxy<br>1-propanesulfonic acid |
| 238.1427 | 237.136 | 0.0011  | 238.1438 | 102 | 64.3 | Tyrosine, butyl ester                                   |
| 238.1427 | 474.234 | -0.0185 | 238.1242 | 38  | 100  | Trp-Asn-Arg                                             |
| 205.1375 | 204.09  | -0.0403 | 205.0972 | 16  | 56.6 | Fenozolone                                              |
| 205.1375 | 408.201 | -0.0298 | 205.1077 | 100 | 55.4 | Phe-Asp-Lys                                             |
| 205.1375 | 408.201 | -0.0298 | 205.1077 | 230 | 27.7 | Phe-Asp-Lys                                             |
| 205.1375 | 408.212 | -0.0242 | 205.1133 | 183 | 18.4 | Phe-Ser-Arg                                             |
| 238.1504 | 237.103 | -0.0396 | 238.1108 | 20  | 100  | 3-(Cyclohexylamino)-2-hydroxy<br>1-propanesulfonic acid |
| 238.1504 | 237.136 | -0.0066 | 238.1438 | 63  | 77.6 | Viloxazine                                              |
| 238.1504 | 237.136 | -0.0066 | 238.1438 | 19  | 37.1 | Viloxazine                                              |
| 238.1504 | 237.103 | -0.0396 | 238.1108 | 112 | 54.4 | Methionine sulphone, butyl<br>ester                     |
| 326.1909 | 325.225 | 0.0417  | 326.2326 | 9   | 100  | Bisoprolol                                              |
| 326.1909 | 325.225 | 0.0417  | 326.2326 | 56  | 76.6 | Bisoprolol                                              |
| 205.1202 | 204.09  | -0.023  | 205.0972 | 82  | 100  | Fenozolone                                              |
| 205.1202 | 408.237 | 0.0057  | 205.1259 | 140 | 18.3 | Tyr-Val-Lys                                             |
| 205.1202 | 408.223 | -0.001  | 205.119  | 198 | 22.3 | Pro-His-Arg                                             |
| 205.1202 | 204.072 | -0.0408 | 205.0794 | 115 | 38.5 | Tetramisole                                             |
| 205.1375 | 188.116 | -0.0181 | 205.1194 | 222 | 100  | Glycyl-L-norleucine                                     |
| 205.1375 | 204.09  | -0.0403 | 205.0972 | 124 | 100  | Fenozolone                                              |
| 205.1375 | 204.09  | -0.0403 | 205.0972 | 257 | 82.2 | Ethotoin                                                |
| 205.1375 | 204.09  | -0.0403 | 205.0972 | 6   | 100  | Fenozolone                                              |
| 211.132  | 188.116 | -0.0267 | 211.1053 | 39  | 47.1 | Ile-Gly                                                 |
| 211.132  | 0       | -0.03   | 211.1    | 132 | 77.2 | Sinapyl alcohol                                         |
| 211.132  | 0       | -0.03   | 211.1    | 112 | 77.5 | Sinapyl alcohol                                         |
| 211.132  | 0       | -0.05   | 211.08   | 154 | 27   | D-Glucoheptose                                          |
| 150.1003 | 150.128 | 0.0274  | 150.1277 | 45  | 68.2 | N-Butyl-4-methylpyridinium                              |
| 150.1003 | 167.058 | -0.045  | 150.055  | 57  | 52.3 | 3-Methyl-2-nitrobenzyl alcohol                          |
| 150.1003 | 149.07  | -0.0229 | 150.0774 | 112 | 92.1 | Adenine, N6-methyl                                      |
| 150.1003 | 149.07  | -0.0229 | 150.0774 | 47  | 33.3 | Adenine, N6-methyl                                      |
| 164.0069 | 163.046 | 0.0459  | 164.0528 | 95  | 73.5 | Benzothiazole, 2,5-dimethyl-                            |
| 164.0069 | 163.046 | 0.0459  | 164.0528 | 34  | 56   | Benzothiazole, 2,5-dimethyl-                            |
| 164.0069 | 163.048 | 0.0484  | 164.0553 | 86  | 100  | 4-Hydroxy-L-glutamic acid                               |
| 164.0069 | 163.038 | 0.0386  | 164.0455 | 47  | 100  | 7-Nitroindazole                                         |
| 205.1202 | 408.201 | -0.0125 | 205.1077 | 77  | 22.5 | Phe-Asp-Lys                                             |
| 205.1202 | 204.09  | -0.023  | 205.0972 | 242 | 78   | Ethotoin                                                |
| 205.1202 | 204.09  | -0.023  | 205.0972 | 219 | 74.1 | Fenozolone                                              |
| 205.1202 | 204.072 | -0.0408 | 205.0794 | 163 | 26.1 | Tetramisole                                             |
| 266.1596 | 265.168 | 0.0155  | 266.1751 | 13  | 100  | Oxprenolol                                              |
| 266.1596 | 265.131 | -0.0209 | 266.1387 | 218 | 97.6 | L-Phenylalanine, N-[(1,1-<br>dimethylethoxy)carbonyl]-  |
| 276.1945 | 275.159 | -0.0279 | 276.1666 | 41  | 20.8 | Thr-Arg                                                 |

|          |         |         |          |     |      |                                                         |
|----------|---------|---------|----------|-----|------|---------------------------------------------------------|
| 276.1945 | 275.159 | -0.0279 | 276.1666 | 126 | 87.1 | Arg-Thr                                                 |
| 276.1945 | 319.133 | -0.0438 | 276.1507 | 52  | 100  | Norfloxacin                                             |
| 276.1945 | 275.148 | -0.0391 | 276.1554 | 86  | 40.1 | Glu-Lys                                                 |
| 164.0069 | 163.046 | 0.0459  | 164.0528 | 71  | 38.7 | Benzothiazole, 2,5-dimethyl-                            |
| 164.0069 | 163.049 | 0.0498  | 164.0567 | 67  | 81.2 | Pterine                                                 |
| 164.0069 | 163.048 | 0.0484  | 164.0553 | 79  | 57.3 | 4-Hydroxy-L-glutamic acid                               |
| 164.0069 | 163.046 | 0.0459  | 164.0528 | 81  | 73.4 | Benzothiazole, 2,5-dimethyl-                            |
| 164.0069 | 163.046 | 0.0459  | 164.0528 | 63  | 100  | Benzothiazole, 2,5-dimethyl-                            |
| 150.1003 | 167.095 | -0.009  | 150.0913 | 7   | 55.4 | Synephrine                                              |
| 150.1003 | 167.058 | -0.045  | 150.055  | 205 | 69   | 3-Methyl-2-nitrobenzyl alcohol                          |
| 150.1003 | 167.095 | -0.009  | 150.0913 | 71  | 100  | Synephrine                                              |
| 149.0962 | 165.115 | -0.0001 | 149.0961 | 224 | 84.8 | (+/-)-p-Methoxyamphetamine                              |
| 149.0962 | 148.1   | 0.0111  | 149.1073 | 253 | 97.1 | N-Benzylacetamidine                                     |
| 149.0962 | 150     | -0.05   | 149.05   | 293 | 82   | D-(-)-Arabinose                                         |
| 149.0962 | 165.115 | -0.0001 | 149.0961 | 7   | 100  | (+/-)-p-Methoxyamphetamine                              |
| 276.1945 | 275.159 | -0.0279 | 276.1666 | 154 | 52.1 | Thr-Arg                                                 |
| 276.1945 | 275.152 | -0.0351 | 276.1594 | 138 | 86.2 | Methylenedioxypropylvalerone                            |
| 276.1945 | 275.159 | -0.0279 | 276.1666 | 51  | 39.1 | Thr-Arg                                                 |
| 276.1945 | 275.152 | -0.0351 | 276.1594 | 128 | 100  | Methylenedioxypropylvalerone                            |
| 134.0898 | 0       | -0.03   | 134.06   | 210 | 74.6 | Oxindole                                                |
| 134.0898 | 135     | -0.04   | 134.05   | 194 | 59.3 | Adenine                                                 |
| 134.0898 | 151.1   | 0.0066  | 134.0964 | 36  | 35.3 | Norephedrine                                            |
| 176.0975 | 175     | -0.03   | 176.07   | 59  | 67   | 1-Methoxy-3-carbaldehyde                                |
| 176.0975 | 175.121 | 0.0306  | 176.1281 | 2   | 100  | Threonine, butyl ester                                  |
| 176.0975 | 193.058 | -0.0428 | 176.0547 | 47  | 69.3 | S-(2-Boronoethyl)-L-cysteine                            |
| 176.0975 | 193.058 | -0.0428 | 176.0547 | 85  | 100  | S-(2-Boronoethyl)-L-cysteine                            |
| 134.0966 | 135     | -0.05   | 134.05   | 71  | 59.2 | Adenine                                                 |
| 134.0966 | 283.164 | -0.0204 | 134.0762 | 144 | 30.4 | Lys-His                                                 |
| 134.0966 | 0       | -0.04   | 134.06   | 68  | 68.7 | Oxindole                                                |
| 134.0966 | 151.1   | -0.0002 | 134.0964 | 99  | 80.2 | Norephedrine                                            |
| 238.1427 | 237.103 | -0.0319 | 238.1108 | 11  | 100  | 3-(Cyclohexylamino)-2-hydroxy<br>1-propanesulfonic acid |
| 238.1427 | 474.234 | -0.0185 | 238.1242 | 61  | 33.5 | Trp-Asn-Arg                                             |
| 238.1427 | 474.234 | -0.0185 | 238.1242 | 35  | 39   | Tyr-His-Arg                                             |
| 276.2063 | 275.159 | -0.0397 | 276.1666 | 25  | 100  | Thr-Arg                                                 |
| 276.2063 | 275.159 | -0.0397 | 276.1666 | 44  | 32.8 | Arg-Thr                                                 |
| 276.2063 | 275.159 | -0.0397 | 276.1666 | 59  | 64.7 | Arg-Thr                                                 |
| 276.2063 | 275.159 | -0.0397 | 276.1666 | 61  | 74.9 | Arg-Thr                                                 |
| 205.1202 | 204.09  | -0.023  | 205.0972 | 36  | 52.4 | Fenozolone                                              |
| 205.1202 | 204.09  | -0.023  | 205.0972 | 143 | 39.4 | L-Tryptophan                                            |
| 205.1202 | 204.09  | -0.023  | 205.0972 | 146 | 68   | Ethotoin                                                |

|          |         |         |          |     |      |                                                      |
|----------|---------|---------|----------|-----|------|------------------------------------------------------|
| 205.1202 | 204.1   | -0.013  | 205.107  | 132 | 53.4 | 1,6-Anhydro-b-D-glucose, permethyl-                  |
| 276.1945 | 275.159 | -0.0279 | 276.1666 | 86  | 60.8 | Thr-Arg                                              |
| 276.1945 | 275.159 | -0.0279 | 276.1666 | 58  | 100  | Thr-Arg                                              |
| 276.1945 | 275.159 | -0.0279 | 276.1666 | 68  | 52.5 | Thr-Arg                                              |
| 276.1945 | 275.152 | -0.0351 | 276.1594 | 51  | 39.5 | 4-Hydroxypropranolol                                 |
| 150.1003 | 167.095 | -0.009  | 150.0913 | 97  | 76.4 | Synephrine                                           |
| 150.1003 | 303.147 | -0.009  | 150.0913 | 59  | 79.6 | Cocaine                                              |
| 150.1003 | 149.12  | 0.0274  | 150.1277 | 145 | 48.5 | Methamphetamine                                      |
| 150.1003 | 150.053 | -0.0242 | 150.0761 | 7   | 52   | D-(+)-Xylose                                         |
| 205.1202 | 204.09  | -0.023  | 205.0972 | 99  | 77.6 | L-Tryptophan                                         |
| 205.1202 | 204.072 | -0.0408 | 205.0794 | 161 | 51.9 | Tetramisole                                          |
| 205.1202 | 204.09  | -0.023  | 205.0972 | 167 | 68.6 | Fenozolone                                           |
| 205.1202 | 204.09  | -0.023  | 205.0972 | 145 | 75.5 | Ethotoin                                             |
| 205.1202 | 204.075 | -0.0383 | 205.0819 | 73  | 73.1 | Gly-Glu                                              |
| 205.1202 | 204.075 | -0.0383 | 205.0819 | 144 | 76.7 | Gly-Glu                                              |
| 205.1202 | 408.223 | -0.001  | 205.119  | 58  | 24.4 | Pro-His-Arg                                          |
| 205.1202 | 204.072 | -0.0408 | 205.0794 | 18  | 32.9 | Tetramisole                                          |
| 176.1041 | 175.059 | -0.0375 | 176.0666 | 61  | 83.6 | Guanidinosuccinic acid                               |
| 176.1041 | 175.121 | 0.024   | 176.1281 | 47  | 70.2 | Threonine, butyl ester                               |
| 176.1041 | 175.063 | -0.0335 | 176.0706 | 75  | 50   | 3-Indoleacetic acid                                  |
| 176.1041 | 175.048 | -0.0488 | 176.0553 | 27  | 50   | Dimethyloxallylglycine                               |
| 276.1945 | 275.159 | -0.0279 | 276.1666 | 44  | 41.9 | Thr-Arg                                              |
| 276.1945 | 275.163 | -0.0238 | 276.1707 | 91  | 66.1 | Physostigmine                                        |
| 276.1945 | 319.133 | -0.0438 | 276.1507 | 71  | 100  | Norfloxacin                                          |
| 205.1375 | 408.212 | -0.0242 | 205.1133 | 66  | 9.3  | Phe-Ser-Arg                                          |
| 205.1375 | 204.09  | -0.0403 | 205.0972 | 170 | 71.3 | L-Tryptophan                                         |
| 205.1202 | 204.072 | -0.0408 | 205.0794 | 21  | 19.9 | Levamisole                                           |
| 205.1202 | 204.075 | -0.0383 | 205.0819 | 109 | 52.6 | Gly-Glu                                              |
| 205.1202 | 204.075 | -0.0383 | 205.0819 | 208 | 89.9 | Gly-Glu                                              |
| 205.1202 | 204.072 | -0.0408 | 205.0794 | 122 | 39.2 | Levamisole                                           |
| 238.1311 | 237.092 | -0.0318 | 238.0993 | 102 | 80.1 | Ketamine                                             |
| 238.1311 | 0       | -0.02   | 238.11   | 57  | 30.5 | COTARNINE                                            |
| 238.1311 | 237.103 | -0.0203 | 238.1108 | 125 | 63   | 3-(Cyclohexylamino)-2-hydroxy 1-propanesulfonic acid |
| 238.1311 | 237.103 | -0.0203 | 238.1108 | 79  | 51.1 | 3-(Cyclohexylamino)-2-hydroxy 1-propanesulfonic acid |
| 150.1003 | 167.095 | -0.009  | 150.0913 | 13  | 100  | Synephrine                                           |
| 150.1003 | 167.095 | -0.009  | 150.0913 | 11  | 37.6 | Synephrine                                           |
| 150.1003 | 150.053 | -0.0242 | 150.0761 | 72  | 46.2 | D-(+)-Xylose                                         |
| 164.0069 | 163.046 | 0.0459  | 164.0528 | 127 | 100  | Benzothiazole, 2,5-dimethyl-                         |
| 164.0069 | 163.048 | 0.0484  | 164.0553 | 69  | 61.5 | 4-Hydroxy-L-glutamic acid                            |
| 164.0069 | 163.048 | 0.0484  | 164.0553 | 85  | 100  | 4-Hydroxy-L-glutamic acid                            |
| 149.0962 | 148.11  | 0.021   | 149.1172 | 46  | 77.3 | 1-(2-Methoxyethoxy)-2-methyl-2-propanol              |



|          |         |         |          |     |      |                                                      |
|----------|---------|---------|----------|-----|------|------------------------------------------------------|
| 149.0962 | 148.11  | 0.021   | 149.1172 | 38  | 61.3 | 1-(2-Methoxyethoxy)-2-methyl-2-propanol              |
| 164.0069 | 163.049 | 0.0498  | 164.0567 | 69  | 45.4 | Pterine                                              |
| 164.0069 | 163.046 | 0.0459  | 164.0528 | 56  | 47.6 | Benzothiazole, 2,5-dimethyl-                         |
| 276.1945 | 275.159 | -0.0279 | 276.1666 | 127 | 74   | Arg-Thr                                              |
| 276.1945 | 0       | -0.02   | 276.17   | 153 | 87   | cyclobenzaprine                                      |
| 276.1945 | 275.159 | -0.0279 | 276.1666 | 89  | 53.1 | Arg-Thr                                              |
| 164.0069 | 163.046 | 0.0459  | 164.0528 | 108 | 92.3 | Benzothiazole, 2,5-dimethyl-                         |
| 164.0069 | 163.046 | 0.0459  | 164.0528 | 75  | 100  | Benzothiazole, 2,5-dimethyl-                         |
| 164.0069 | 163.046 | 0.0459  | 164.0528 | 62  | 66.7 | Benzothiazole, 2,5-dimethyl-                         |
| 163.1064 | 162.116 | 0.017   | 163.123  | 32  | 12.2 | Nicotine                                             |
| 163.1064 | 179.095 | -0.031  | 163.0754 | 148 | 32.6 | 3,4-Methylenedioxyamphetamine                        |
| 163.1064 | 162.116 | 0.017   | 163.123  | 38  | 27.8 | Anabasine                                            |
| 257.1488 | 256.117 | -0.0244 | 257.1244 | 76  | 35.7 | His-Thr                                              |
| 257.1488 | 274.128 | -0.0244 | 257.1244 | 98  | 77.1 | Gln-Gln                                              |
| 205.1202 | 408.201 | -0.0125 | 205.1077 | 65  | 37.1 | Phe-Asp-Lys                                          |
| 205.1202 | 204.09  | -0.023  | 205.0972 | 96  | 45.5 | L-Tryptophan                                         |
| 205.1202 | 408.223 | -0.001  | 205.119  | 80  | 16.5 | Pro-His-Arg                                          |
| 205.1202 | 408.212 | -0.0069 | 205.1133 | 122 | 20   | Phe-Ser-Arg                                          |
| 205.1202 | 204.075 | -0.0383 | 205.0819 | 161 | 79.1 | Gly-Glu                                              |
| 205.1202 | 204.075 | -0.0383 | 205.0819 | 84  | 64.1 | Gly-Glu                                              |
| 205.1202 | 204.09  | -0.023  | 205.0972 | 137 | 17.8 | Fenozolone                                           |
| 205.1202 | 408.212 | -0.0069 | 205.1133 | 190 | 9.8  | Tyr-Ala-Arg                                          |
| 276.1945 | 275.159 | -0.0279 | 276.1666 | 51  | 17.2 | Thr-Arg                                              |
| 276.1945 | 319.133 | -0.0438 | 276.1507 | 72  | 81.4 | Norfloxacin                                          |
| 276.1945 | 275.152 | -0.0351 | 276.1594 | 54  | 32.3 | 4-Hydroxypropranolol                                 |
| 276.1945 | 319.133 | -0.0438 | 276.1507 | 66  | 85.2 | Norfloxacin                                          |
| 150.1003 | 167.095 | -0.009  | 150.0913 | 5   | 100  | Synephrine                                           |
| 150.1003 | 150.053 | -0.0242 | 150.0761 | 118 | 25.5 | D-(-)-Ribose                                         |
| 150.1003 | 149     | -0.02   | 150.08   | 249 | 85.8 | 3-Methyladenine                                      |
| 150.1003 | 167.095 | -0.009  | 150.0913 | 154 | 79.2 | Synephrine                                           |
| 238.1427 | 237.092 | -0.0434 | 238.0993 | 77  | 83.8 | Ketamine                                             |
| 238.1427 | 237.136 | 0.0011  | 238.1438 | 24  | 41.7 | Viloxazine                                           |
| 238.1427 | 0       | -0.05   | 238.09   | 80  | 31.9 | Biopterin                                            |
| 238.1427 | 0       | -0.05   | 238.09   | 73  | 84   | Biopterin                                            |
| 327.1725 | 326.199 | 0.0342  | 327.2067 | 72  | 100  | Ajmaline                                             |
| 327.1725 | 0       | 0.04    | 327.21   | 14  | 59.3 | Ajmaline                                             |
| 327.1725 | 344.199 | 0.023   | 327.1955 | 107 | 77.2 | Tetrahydrocannabinol(nor-delta-9-HOOC)               |
| 326.2095 | 652     | -0.0459 | 326.1636 | 90  | 80.9 | YAFPGP/2                                             |
| 238.1427 | 237.103 | -0.0319 | 238.1108 | 4   | 100  | 3-(Cyclohexylamino)-2-hydroxy-1-propanesulfonic acid |
| 238.1427 | 474.234 | -0.0185 | 238.1242 | 66  | 33   | Trp-Asn-Arg                                          |
| 238.1427 | 0       | -0.03   | 238.11   | 187 | 94.4 | COTARNINE                                            |
| 238.1427 | 237.092 | -0.0434 | 238.0993 | 16  | 55.4 | Ketamine                                             |

|          |         |         |          |     |      |                                     |
|----------|---------|---------|----------|-----|------|-------------------------------------|
| 276.1945 | 275.148 | -0.0391 | 276.1554 | 32  | 100  | Glu-Lys                             |
| 276.1945 | 275.163 | -0.0238 | 276.1707 | 133 | 85.6 | Physostigmine                       |
| 150.1003 | 150.053 | -0.0242 | 150.0761 | 71  | 36.3 | D-(+)-Xylose                        |
| 150.1003 | 149.07  | -0.0229 | 150.0774 | 67  | 38.4 | Adenine, N6-methyl                  |
| 150.1003 | 149.07  | -0.0229 | 150.0774 | 109 | 41.8 | Adenine, N6-methyl                  |
| 150.1003 | 303.147 | -0.009  | 150.0913 | 79  | 83.6 | Cocaine                             |
| 150.1003 | 167.095 | -0.009  | 150.0913 | 90  | 50.2 | Synephrine                          |
| 150.1003 | 149.07  | -0.0229 | 150.0774 | 70  | 100  | Adenine, N6-methyl                  |
| 150.1003 | 149.12  | 0.0274  | 150.1277 | 169 | 73.7 | Methamphetamine                     |
| 149.0962 | 165.115 | -0.0001 | 149.0961 | 64  | 84.9 | (./-.)-p-Methoxyamphetamine         |
| 149.0962 | 165.115 | -0.0001 | 149.0961 | 57  | 100  | (./-.)-p-Methoxyamphetamine         |
| 149.0962 | 166.063 | -0.0365 | 149.0597 | 43  | 57.8 | Tropic acid                         |
| 149.0962 | 166.063 | -0.0365 | 149.0597 | 67  | 81.2 | Tropic acid                         |
| 205.1202 | 204.09  | -0.023  | 205.0972 | 19  | 100  | Fenozolone                          |
| 205.1202 | 204     | -0.02   | 205.1    | 88  | 30.2 | L-Tryptophane                       |
| 205.1202 | 103.063 | -0.0008 | 205.1194 | 185 | 65.8 | Butanoic acid, 2-amino-, (R)-       |
| 205.1202 | 204.1   | -0.013  | 205.107  | 64  | 77.3 | 1,6-Anhydro-b-D-glucose, permethyl- |
| 164.0069 | 163.046 | 0.0459  | 164.0528 | 76  | 86.6 | Benzothiazole, 2,5-dimethyl-        |
| 164.0069 | 163.046 | 0.0459  | 164.0528 | 48  | 100  | Benzothiazole, 2,5-dimethyl-        |
| 164.0069 | 163.049 | 0.0498  | 164.0567 | 80  | 100  | Pterine                             |
| 164.0069 | 163.048 | 0.0484  | 164.0553 | 66  | 100  | 4-Hydroxy-L-glutamic acid           |
| 176.1257 | 175.096 | -0.023  | 176.103  | 45  | 32.2 | L-Citrulline                        |
| 176.1257 | 175.121 | 0.0024  | 176.1281 | 8   | 100  | Threonine, butyl ester              |
| 164.0069 | 163.046 | 0.0459  | 164.0528 | 51  | 61.5 | Benzothiazole, 2,5-dimethyl-        |
| 164.0069 | 163.048 | 0.0484  | 164.0553 | 12  | 38.3 | 4-Hydroxy-L-glutamic acid           |
| 164.0069 | 163.038 | 0.0386  | 164.0455 | 95  | 100  | 7-Nitroindazole                     |
| 176.1041 | 175.096 | -0.001  | 176.103  | 35  | 27.3 | L-Citrulline                        |
| 176.1041 | 193.058 | -0.0494 | 176.0547 | 69  | 62.9 | S-(2-Boronoethyl)-L-cysteine        |
| 176.1041 | 193.058 | -0.0494 | 176.0547 | 25  | 60.8 | S-(2-Boronoethyl)-L-cysteine        |
| 176.1041 | 193.058 | -0.0494 | 176.0547 | 55  | 68.7 | S-(2-Boronoethyl)-L-cysteine        |
| 164.0069 | 163.046 | 0.0459  | 164.0528 | 83  | 61   | Benzothiazole, 2,5-dimethyl-        |
| 164.0069 | 163.046 | 0.0459  | 164.0528 | 128 | 86.8 | Benzothiazole, 2,5-dimethyl-        |
| 164.0069 | 163.048 | 0.0484  | 164.0553 | 6   | 100  | 4-Hydroxy-L-glutamic acid           |
| 211.1775 | 210.126 | -0.0446 | 211.1329 | 119 | 48.5 | Jasmonic Acid                       |
| 211.1775 | 210.126 | -0.0446 | 211.1329 | 36  | 29.4 | Jasmonic Acid                       |
| 211.1775 | 420.249 | -0.046  | 211.1315 | 39  | 34.8 | Phe-Val-Arg                         |
| 205.1202 | 204.075 | -0.0383 | 205.0819 | 24  | 100  | Gly-Glu                             |
| 205.1202 | 204.075 | -0.0383 | 205.0819 | 89  | 35.6 | Gly-Glu                             |
| 205.1202 | 204.072 | -0.0408 | 205.0794 | 92  | 37.9 | Tetramisole                         |
| 205.1202 | 204.072 | -0.0408 | 205.0794 | 96  | 28.3 | Tetramisole                         |
| 205.1375 | 204.09  | -0.0403 | 205.0972 | 20  | 100  | Fenozolone                          |

|          |         |         |          |     |      |                                                      |
|----------|---------|---------|----------|-----|------|------------------------------------------------------|
| 205.1375 | 204.09  | -0.0403 | 205.0972 | 54  | 35   | L-Tryptophan                                         |
| 205.1375 | 103.063 | -0.0181 | 205.1194 | 184 | 89.4 | Butanoic acid, 2-amino-, (S)-                        |
| 205.1375 | 204.09  | -0.0403 | 205.0972 | 157 | 68   | L-Tryptophan                                         |
| 276.1809 | 275.167 | -0.0062 | 276.1747 | 123 | 62.3 | Cyclobenzaprine                                      |
| 276.1809 | 319.133 | -0.0302 | 276.1507 | 49  | 82.2 | Norfloxacin                                          |
| 276.1809 | 275.152 | -0.0215 | 276.1594 | 129 | 74.4 | 4-Hydroxypropranolol                                 |
| 276.1809 | 275.152 | -0.0215 | 276.1594 | 126 | 57.3 | Homatropine                                          |
| 163.1064 | 162.064 | -0.0351 | 163.0713 | 69  | 50.3 | Gly-Ser                                              |
| 163.1064 | 162.126 | 0.0264  | 163.1329 | 80  | 35.5 | Ethanol, 2-(2-butoxyethoxy)-                         |
| 163.1064 | 162.126 | 0.0264  | 163.1329 | 92  | 55.2 | Ethanol, 2-(2-butoxyethoxy)-                         |
| 163.1064 | 486.314 | 0.0055  | 163.1119 | 94  | 26.9 | Arg-Arg-Arg                                          |
| 276.1945 | 275.159 | -0.0279 | 276.1666 | 72  | 50.4 | Thr-Arg                                              |
| 276.1945 | 275.159 | -0.0279 | 276.1666 | 52  | 48.5 | Thr-Arg                                              |
| 276.1945 | 275.148 | -0.0391 | 276.1554 | 28  | 30.1 | Glu-Lys                                              |
| 276.1945 | 275.152 | -0.0351 | 276.1594 | 151 | 82.5 | Methylenedioxypropylvalerone                         |
| 176.1125 | 175.059 | -0.0459 | 176.0666 | 9   | 24.6 | Guanidinosuccinic acid                               |
| 176.1125 | 175.063 | -0.0419 | 176.0706 | 14  | 54.2 | 3-Indoleacetic acid                                  |
| 276.1945 | 275.159 | -0.0279 | 276.1666 | 42  | 46.8 | Thr-Arg                                              |
| 276.1945 | 275.159 | -0.0279 | 276.1666 | 32  | 39.9 | Arg-Thr                                              |
| 276.1945 | 275.159 | -0.0279 | 276.1666 | 59  | 100  | Thr-Arg                                              |
| 205.1202 | 204.075 | -0.0383 | 205.0819 | 133 | 100  | Gly-Glu                                              |
| 205.1202 | 204.075 | -0.0383 | 205.0819 | 113 | 57.3 | Gly-Glu                                              |
| 205.1202 | 204.072 | -0.0408 | 205.0794 | 216 | 38.8 | Tetramisole                                          |
| 205.1202 | 204.09  | -0.023  | 205.0972 | 67  | 35.8 | Ethotoin                                             |
| 238.1427 | 215.116 | -0.038  | 238.105  | 39  | 51   | L-Proline, N-[(1,1-dimethylethoxy)carbonyl]-         |
| 238.1427 | 237.092 | -0.0434 | 238.0993 | 27  | 44   | Ketamine                                             |
| 238.1427 | 0       | -0.03   | 238.11   | 43  | 47.1 | COTARNINE                                            |
| 238.1427 | 237.103 | -0.0319 | 238.1108 | 111 | 56.7 | 3-(Cyclohexylamino)-2-hydroxy-1-propanesulfonic acid |
| 276.1945 | 275.159 | -0.0279 | 276.1666 | 120 | 54.4 | Thr-Arg                                              |
| 276.1945 | 319.133 | -0.0438 | 276.1507 | 59  | 100  | Norfloxacin                                          |
| 276.1945 | 319.133 | -0.0438 | 276.1507 | 56  | 82.2 | Norfloxacin                                          |
| 276.1945 | 275.152 | -0.0351 | 276.1594 | 139 | 63.3 | 4-Hydroxypropranolol                                 |
| 211.1345 | 188.116 | -0.0292 | 211.1053 | 34  | 41.6 | Ile-Gly                                              |
| 211.1345 | 210.1   | -0.0268 | 211.1077 | 46  | 100  | Aprobarbital                                         |
| 211.1345 | 420.179 | -0.0377 | 211.0968 | 27  | 34.1 | Met-Asp-Arg                                          |
| 211.1345 | 210.1   | -0.0268 | 211.1077 | 156 | 78.4 | Aprobarbital                                         |
| 134.1002 | 135     | -0.05   | 134.05   | 238 | 78.8 | Adenine                                              |
| 134.1002 | 0       | -0.04   | 134.06   | 377 | 88.4 | Oxindole                                             |
| 134.1002 | 283.164 | -0.024  | 134.0762 | 52  | 37.5 | Lys-His                                              |
| 134.1002 | 283.164 | -0.024  | 134.0762 | 15  | 58.6 | Lys-His                                              |
| 205.1202 | 188.116 | -0.0008 | 205.1194 | 64  | 42.1 | Glycyl-L-norleucine                                  |
| 205.1202 | 204.075 | -0.0383 | 205.0819 | 217 | 55.2 | Gly-Glu                                              |
| 205.1202 | 408.237 | 0.0057  | 205.1259 | 140 | 13.6 | Tyr-Val-Lys                                          |
| 257.1488 | 256.117 | -0.0244 | 257.1244 | 96  | 47.9 | Thr-His                                              |

|          |         |         |          |     |      |                              |
|----------|---------|---------|----------|-----|------|------------------------------|
| 257.1488 | 256.11  | -0.0316 | 257.1172 | 8   | 100  | Pterostilbene                |
| 257.1488 | 256.11  | -0.0316 | 257.1172 | 50  | 100  | Pterostilbene                |
| 149.0962 | 148.1   | 0.0111  | 149.1073 | 49  | 55.4 | Nornicotine                  |
| 149.0962 | 148.1   | 0.0111  | 149.1073 | 112 | 63.5 | N-Benzylacetamide            |
| 149.0962 | 166.063 | -0.0365 | 149.0597 | 99  | 74.1 | Tropic acid                  |
| 134.0898 | 135     | -0.04   | 134.05   | 195 | 80.9 | Adenine                      |
| 134.0898 | 283.164 | -0.0136 | 134.0762 | 50  | 36.9 | Lys-His                      |
| 134.0898 | 0       | -0.01   | 134.08   | 194 | 50.5 | L-O-Methylthreonine          |
| 149.1007 | 165.115 | -0.0046 | 149.0961 | 38  | 64.3 | (.+/-)-p-Methoxyamphetamine  |
| 149.1007 | 150     | -0.05   | 149.05   | 94  | 59.3 | D-(-)-Arabinose              |
| 149.0962 | 165.115 | -0.0001 | 149.0961 | 8   | 100  | (.+/-)-p-Methoxyamphetamine  |
| 149.0962 | 165.115 | -0.0001 | 149.0961 | 80  | 84.5 | (.+/-)-p-Methoxyamphetamine  |
| 164.0069 | 163.046 | 0.0459  | 164.0528 | 126 | 84.4 | Benzothiazole, 2,5-dimethyl- |
| 164.0069 | 163.046 | 0.0459  | 164.0528 | 61  | 65.2 | Benzothiazole, 2,5-dimethyl- |
| 164.0069 | 163.049 | 0.0498  | 164.0567 | 103 | 100  | Pterine                      |
| 164.0069 | 163.049 | 0.0498  | 164.0567 | 85  | 73   | Pterine                      |
| 164.0069 | 163     | 0.03    | 164.04   | 68  | 78.2 | N-Acetyl-L-cysteine          |
| 164.0069 | 163     | 0.03    | 164.04   | 72  | 49.1 | N-Acetyl-L-cysteine          |
| 164.0069 | 163.048 | 0.0484  | 164.0553 | 4   | 100  | 4-Hydroxy-L-glutamic acid    |
| 164.0069 | 163.046 | 0.0459  | 164.0528 | 75  | 78.9 | Benzothiazole, 2,5-dimethyl- |
| 164.0069 | 163.046 | 0.0459  | 164.0528 | 60  | 48.3 | Benzothiazole, 2,5-dimethyl- |
| 164.0069 | 163.046 | 0.0459  | 164.0528 | 20  | 100  | Benzothiazole, 2,5-dimethyl- |
| 164.0069 | 163.049 | 0.0498  | 164.0567 | 62  | 100  | Pterine                      |
| 211.1441 | 210.159 | 0.0225  | 211.1666 | 16  | 56   | Altretamine                  |
| 211.1441 | 420.223 | -0.025  | 211.119  | 171 | 63   | His-His-Lys                  |
| 211.1441 | 210.126 | -0.0112 | 211.1329 | 28  | 34.2 | Jasmonic Acid                |
| 211.1441 | 0       | -0.04   | 211.1    | 66  | 20.2 | Sinapyl alcohol              |
| 205.1375 | 408.237 | -0.0116 | 205.1259 | 97  | 23.8 | Tyr-Val-Lys                  |
| 205.1375 | 408.223 | -0.018  | 205.119  | 116 | 26.2 | Pro-His-Arg                  |
| 205.1375 | 204.09  | -0.0403 | 205.0972 | 216 | 73   | Ethotoin                     |
| 150.1003 | 167.095 | -0.009  | 150.0913 | 76  | 70.9 | Synephrine                   |
| 150.1003 | 132.042 | -0.0242 | 150.0761 | 65  | 22.5 | Ethyl hydrogen malonate      |
| 150.1003 | 150.053 | -0.0242 | 150.0761 | 81  | 52.2 | D-(+)-Xylose                 |
| 150.1003 | 150.053 | -0.0242 | 150.0761 | 43  | 32.2 | D-(+)-Xylose                 |
| 276.1945 | 275.159 | -0.0279 | 276.1666 | 138 | 62   | Arg-Thr                      |
| 276.1945 | 275.148 | -0.0391 | 276.1554 | 42  | 100  | Glu-Lys                      |
| 276.1945 | 275.152 | -0.0351 | 276.1594 | 108 | 81   | Methylenedioxypropylvalerone |
| 211.1441 | 0       | -0.01   | 211.13   | 49  | 38.1 | Jasmonic acid                |
| 211.1441 | 0       | 0.03    | 211.17   | 129 | 32.6 | altretamine                  |
| 211.1441 | 0       | -0.04   | 211.1    | 65  | 72.2 | Sinapyl alcohol              |
| 296.2263 | 295.178 | -0.0407 | 296.1856 | 31  | 100  | Esmolol                      |
| 238.1427 | 0       | -0.05   | 238.09   | 46  | 27.7 | Biopterin                    |
| 238.1427 | 237.092 | -0.0434 | 238.0993 | 24  | 38.6 | Ketamine                     |
| 238.1427 | 237.092 | -0.0434 | 238.0993 | 32  | 73.2 | Ketamine                     |

|          |         |         |          |     |      |                                                         |
|----------|---------|---------|----------|-----|------|---------------------------------------------------------|
| 238.1427 | 237.103 | -0.0319 | 238.1108 | 152 | 76.5 | 3-(Cyclohexylamino)-2-hydroxy<br>1-propanesulfonic acid |
| 238.1427 | 237.103 | -0.0319 | 238.1108 | 38  | 100  | 3-(Cyclohexylamino)-2-hydroxy<br>1-propanesulfonic acid |
| 238.1427 | 237.136 | 0.0011  | 238.1438 | 44  | 41.9 | Viloxazine                                              |
| 238.1427 | 0       | -0.05   | 238.09   | 91  | 49.4 | Biopterin                                               |
| 238.1427 | 474.234 | -0.0185 | 238.1242 | 77  | 47   | Trp-Asn-Arg                                             |
| 276.1945 | 275.159 | -0.0279 | 276.1666 | 43  | 81.4 | Thr-Arg                                                 |
| 276.1945 | 319.133 | -0.0438 | 276.1507 | 84  | 100  | Norfloxacin                                             |
| 276.1945 | 275.159 | -0.0279 | 276.1666 | 21  | 100  | Arg-Thr                                                 |
| 276.1945 | 275.152 | -0.0351 | 276.1594 | 214 | 81.9 | Homatropine                                             |
| 137.0555 | 136.039 | -0.0097 | 137.0458 | 51  | 16.4 | Allopurinol                                             |
| 137.0555 | 154.063 | 0.0042  | 137.0597 | 158 | 24.1 | 3-Hydroxy-4-methoxybenzyl<br>alcohol                    |
| 137.0555 | 136.039 | -0.0097 | 137.0458 | 98  | 20.6 | Hypoxanthine                                            |
| 137.0555 | 138.045 | -0.0182 | 137.0373 | 121 | 23.9 | Butylphosphonic acid                                    |
| 276.1945 | 275.148 | -0.0391 | 276.1554 | 59  | 34.8 | Glu-Lys                                                 |
| 276.1945 | 275.152 | -0.0351 | 276.1594 | 5   | 100  | Homatropine                                             |
| 276.1945 | 275.148 | -0.0391 | 276.1554 | 74  | 62.3 | Glu-Lys                                                 |
| 276.1945 | 275.159 | -0.0279 | 276.1666 | 91  | 35   | Thr-Arg                                                 |
| 276.1945 | 275.163 | -0.0238 | 276.1707 | 228 | 97   | Physostigmine                                           |
| 276.1945 | 319.133 | -0.0438 | 276.1507 | 69  | 52.2 | Norfloxacin                                             |
| 276.1945 | 275.159 | -0.0279 | 276.1666 | 124 | 30   | Thr-Arg                                                 |
| 393.3061 | 370.308 | -0.0086 | 393.2975 | 83  | 80.2 | Hexanedioic acid, bis(2-<br>ethylhexyl) ester           |
| 393.3061 | 392.293 | -0.0062 | 393.2999 | 43  | 100  | Deoxycholic acid                                        |
| 393.3061 | 392.293 | -0.0062 | 393.2999 | 12  | 57.9 | Deoxycholic acid                                        |
| 115.0519 | 114.025 | -0.0195 | 115.0324 | 37  | 36.4 | Methimazole                                             |
| 115.0519 | 114.025 | -0.0195 | 115.0324 | 72  | 43.9 | Methimazole                                             |
| 115.0519 | 0       | -0.02   | 115.03   | 8   | 27.3 | Methimazole                                             |
| 164.0069 | 163.046 | 0.0459  | 164.0528 | 53  | 83.3 | Benzothiazole, 2,5-dimethyl-                            |
| 164.0069 | 163.046 | 0.0459  | 164.0528 | 78  | 53.3 | Benzothiazole, 2,5-dimethyl-                            |
| 164.0069 | 163     | 0.03    | 164.04   | 74  | 55.4 | N-Acetyl-L-cysteine                                     |
| 164.0069 | 163.049 | 0.0498  | 164.0567 | 61  | 100  | Pterine                                                 |
| 205.1202 | 204.09  | -0.023  | 205.0972 | 145 | 52.1 | Fenozolone                                              |
| 205.1202 | 188.116 | -0.0008 | 205.1194 | 79  | 82.4 | Glycyl-L-norleucine                                     |
| 205.1202 | 204.072 | -0.0408 | 205.0794 | 159 | 40.6 | Levamisole                                              |
| 205.1202 | 408.237 | 0.0057  | 205.1259 | 208 | 65.3 | Tyr-Val-Lys                                             |
| 164.0069 | 163.049 | 0.0498  | 164.0567 | 101 | 71.1 | Pterine                                                 |
| 164.0069 | 163.038 | 0.0386  | 164.0455 | 60  | 44.8 | 7-Nitroindazole                                         |
| 164.0069 | 163.048 | 0.0484  | 164.0553 | 117 | 100  | 4-Hydroxy-L-glutamic acid                               |
| 164.0069 | 163.049 | 0.0498  | 164.0567 | 39  | 100  | Pterine                                                 |
| 205.1202 | 182.087 | -0.0443 | 205.0759 | 181 | 39   | Eflornithine                                            |
| 205.1202 | 204.075 | -0.0383 | 205.0819 | 172 | 84.2 | Gly-Glu                                                 |
| 205.1202 | 204.075 | -0.0383 | 205.0819 | 210 | 34.6 | Gly-Glu                                                 |

|          |         |         |          |     |      |                                             |
|----------|---------|---------|----------|-----|------|---------------------------------------------|
| 205.1202 | 204.072 | -0.0408 | 205.0794 | 152 | 46.3 | Tetramisole                                 |
| 266.1363 | 283.128 | -0.0115 | 266.1248 | 83  | 86.6 | His-Gln                                     |
| 266.1363 | 283.128 | -0.0115 | 266.1248 | 76  | 70.1 | His-Gln                                     |
| 266.1363 | 0       | 0       | 266.14   | 50  | 69.3 | ANISOMYCIN                                  |
| 266.1363 | 265.147 | 0.0176  | 266.1539 | 116 | 94.2 | Desmethyldoxepin                            |
| 150.0831 | 167.095 | 0.0082  | 150.0913 | 18  | 57.3 | Synephrine                                  |
| 150.0831 | 149.12  | 0.0446  | 150.1277 | 260 | 46.2 | Methamphetamine                             |
| 150.0831 | 149.12  | 0.0446  | 150.1277 | 94  | 34.6 | Methamphetamine                             |
| 150.0831 | 149.12  | 0.0446  | 150.1277 | 109 | 67.2 | Methamphetamine                             |
| 211.1441 | 210.116 | -0.021  | 211.123  | 36  | 77.6 | Naphtazoline                                |
| 211.1441 | 420.223 | -0.025  | 211.119  | 92  | 31.8 | His-His-Lys                                 |
| 211.1441 | 0       | -0.01   | 211.13   | 139 | 34.6 | Jasmonic acid                               |
| 211.1441 | 420.179 | -0.0473 | 211.0968 | 123 | 28.9 | Met-Asp-Arg                                 |
| 137.0514 | 137.071 | 0.0195  | 137.0709 | 32  | 6.2  | 1-Methylnicotinamide cation                 |
| 137.0514 | 136.039 | -0.0056 | 137.0458 | 236 | 71.3 | Allopurinol                                 |
| 137.0514 | 138.045 | -0.0141 | 137.0373 | 84  | 19.8 | Butylphosphonic acid                        |
| 137.0514 | 154.027 | -0.0281 | 137.0233 | 108 | 92.3 | Benzoic acid, 2,3-dihydroxy-                |
| 371.3164 | 370.308 | -0.0008 | 371.3156 | 52  | 100  | Hexanedioic acid, bis(2-ethylhexyl) ester   |
| 225.154  | 0       | 0       | 225.15   | 152 | 54.7 | Methyl jasmonate                            |
| 225.154  | 224.189 | 0.0422  | 225.1961 | 272 | 89   | 1,3-Dicyclohexylurea                        |
| 225.154  | 0       | 0       | 225.15   | 147 | 64.9 | Methyl jasmonate                            |
| 225.154  | 0       | 0       | 225.15   | 138 | 100  | Methyl jasmonate                            |
| 419.2933 | 418.236 | -0.0498 | 419.2435 | 171 | 100  | Met-Ile-Arg                                 |
| 419.2933 | 418.236 | -0.0498 | 419.2435 | 131 | 81.7 | Met-Ile-Arg                                 |
| 419.2933 | 418.308 | 0.0223  | 419.3156 | 233 | 88   | 1,2-Benzenedicarboxylic acid, dinonyl ester |
| 419.2933 | 418.308 | 0.0223  | 419.3156 | 129 | 78.2 | 1,2-Benzenedicarboxylic acid, dinonyl ester |
| 257.1363 | 256.11  | -0.0191 | 257.1172 | 96  | 47.6 | Pterostilbene                               |
| 257.1363 | 256.117 | -0.0119 | 257.1244 | 118 | 23   | His-Thr                                     |
| 257.1363 | 256.11  | -0.0191 | 257.1172 | 193 | 100  | Pterostilbene                               |
| 276.1945 | 275.159 | -0.0279 | 276.1666 | 111 | 39.2 | Thr-Arg                                     |
| 276.1945 | 319.133 | -0.0438 | 276.1507 | 69  | 32.9 | Norfloxacin                                 |
| 276.1945 | 319.133 | -0.0438 | 276.1507 | 68  | 64.7 | Norfloxacin                                 |
| 276.1945 | 275.152 | -0.0351 | 276.1594 | 173 | 82.2 | Methylenedioxypropylvalerone                |
| 276.1945 | 275.167 | -0.0198 | 276.1747 | 69  | 39.8 | Cyclobenzaprine                             |
| 276.1945 | 319.133 | -0.0438 | 276.1507 | 70  | 49   | Norfloxacin                                 |
| 276.1945 | 275.152 | -0.0351 | 276.1594 | 169 | 77.8 | Methylenedioxypropylvalerone                |
| 276.1945 | 275.152 | -0.0351 | 276.1594 | 126 | 65.9 | Methylenedioxypropylvalerone                |
| 176.1195 | 175     | -0.05   | 176.07   | 194 | 61.5 | 1-Methoxy-3-carbaldehyde                    |
| 176.1195 | 175.063 | -0.0489 | 176.0706 | 116 | 80.7 | 3-Indoleacetic acid                         |
| 150.1003 | 149.07  | -0.0229 | 150.0774 | 188 | 70.8 | Adenine, N6-methyl                          |
| 150.1003 | 167.095 | -0.009  | 150.0913 | 209 | 68   | Synephrine                                  |
| 150.1003 | 149.07  | -0.0229 | 150.0774 | 92  | 84.7 | Adenine, N6-methyl                          |
| 150.1003 | 149.07  | -0.0229 | 150.0774 | 79  | 34.5 | Adenine, N6-methyl                          |
| 276.1945 | 275.159 | -0.0279 | 276.1666 | 139 | 58.6 | Arg-Thr                                     |

|          |         |         |          |     |      |                                                |
|----------|---------|---------|----------|-----|------|------------------------------------------------|
| 276.1945 | 319.133 | -0.0438 | 276.1507 | 150 | 75.6 | Norfloxacin                                    |
| 276.1945 | 319.133 | -0.0438 | 276.1507 | 149 | 77   | Norfloxacin                                    |
| 276.1945 | 275.152 | -0.0351 | 276.1594 | 150 | 44.3 | Methylenedioxypropylvalerone                   |
| 176.0975 | 175.121 | 0.0306  | 176.1281 | 152 | 100  | Threonine, butyl ester                         |
| 176.0975 | 175.121 | 0.0306  | 176.1281 | 192 | 74.9 | Threonine, butyl ester                         |
| 276.1945 | 275.159 | -0.0279 | 276.1666 | 67  | 53   | Thr-Arg                                        |
| 276.1945 | 275.152 | -0.0351 | 276.1594 | 91  | 79.3 | Methylenedioxypropylvalerone                   |
| 276.1945 | 275.159 | -0.0279 | 276.1666 | 86  | 71.3 | Arg-Thr                                        |
| 276.1945 | 275.152 | -0.0351 | 276.1594 | 136 | 62.7 | Methylenedioxypropylvalerone                   |
| 276.1945 | 275.163 | -0.0238 | 276.1707 | 120 | 40.6 | Physostigmine                                  |
| 276.1945 | 275.163 | -0.0238 | 276.1707 | 121 | 58.6 | Physostigmine                                  |
| 276.1945 | 0       | -0.02   | 276.17   | 140 | 50.6 | cyclobenzaprine                                |
| 276.1945 | 275.152 | -0.0351 | 276.1594 | 109 | 79.6 | Methylenedioxypropylvalerone                   |
| 150.1003 | 149.07  | -0.0229 | 150.0774 | 241 | 91.3 | Adenine, N6-methyl                             |
| 150.1003 | 149.07  | -0.0229 | 150.0774 | 288 | 65   | Adenine, N6-methyl                             |
| 150.1003 | 167.095 | -0.009  | 150.0913 | 94  | 46.5 | Synephrine                                     |
| 150.1003 | 149.07  | -0.0229 | 150.0774 | 60  | 79.9 | Adenine, N6-methyl                             |
| 238.1427 | 237.092 | -0.0434 | 238.0993 | 210 | 87.6 | Ketamine                                       |
| 238.1427 | 0       | -0.05   | 238.09   | 158 | 45   | Biopterin                                      |
| 238.1427 | 237.136 | 0.0011  | 238.1438 | 109 | 42.2 | Viloxazine                                     |
| 238.1427 | 474.234 | -0.0185 | 238.1242 | 167 | 54.3 | Trp-Asn-Arg                                    |
| 150.1003 | 167.095 | -0.009  | 150.0913 | 190 | 79.6 | Synephrine                                     |
| 150.1003 | 149.07  | -0.0229 | 150.0774 | 173 | 83.8 | Adenine, N6-methyl                             |
| 150.1003 | 149.07  | -0.0229 | 150.0774 | 177 | 36.6 | Adenine, N6-methyl                             |
| 150.1003 | 167.095 | -0.009  | 150.0913 | 172 | 56.5 | Synephrine                                     |
| 283.1685 | 282.122 | -0.0396 | 283.1289 | 124 | 30.4 | Thr-Tyr                                        |
| 283.1685 | 282.122 | -0.0396 | 283.1289 | 278 | 63.1 | Tyr-Thr                                        |
| 283.1685 | 282.179 | 0.0179  | 283.1864 | 194 | 75   | 1,3-Bis(tris(hydroxymethyl)methylamino)propane |
| 283.1685 | 282.179 | 0.0179  | 283.1864 | 181 | 84.5 | 1,3-Bis(tris(hydroxymethyl)methylamino)propane |
| 257.1185 | 256.117 | 0.0059  | 257.1244 | 85  | 55.3 | Thr-His                                        |
| 257.1185 | 256.11  | -0.0013 | 257.1172 | 135 | 72.6 | Pterostilbene                                  |
| 257.1185 | 256.117 | 0.0059  | 257.1244 | 70  | 35.6 | Thr-His                                        |
| 257.1185 | 256.11  | -0.0013 | 257.1172 | 62  | 100  | Pterostilbene                                  |
| 283.1685 | 282.179 | 0.0179  | 283.1864 | 169 | 100  | 1,3-Bis(tris(hydroxymethyl)methylamino)propane |
| 283.1685 | 282.122 | -0.0396 | 283.1289 | 206 | 43.8 | Thr-Tyr                                        |
| 283.1685 | 0       | -0.02   | 283.15   | 190 | 44.1 | Artemisinin                                    |
| 283.1685 | 0       | -0.02   | 283.15   | 152 | 29.7 | Artemisinin                                    |
| 371.3164 | 370.308 | -0.0008 | 371.3156 | 26  | 100  | Hexanedioic acid, bis(2-ethylhexyl) ester      |
| 150.0756 | 169.074 | -0.0195 | 150.0561 | 235 | 86.1 | DL-Norepinephrine                              |
| 150.0756 | 149.07  | 0.0018  | 150.0774 | 67  | 55   | Adenine, N6-methyl                             |

|          |         |         |          |     |      |                                                                                              |
|----------|---------|---------|----------|-----|------|----------------------------------------------------------------------------------------------|
| 150.0756 | 169.074 | -0.0195 | 150.0561 | 232 | 41   | DL-Norepinephrine                                                                            |
| 150.0756 | 167.058 | -0.021  | 150.055  | 207 | 61.2 | 3-Methyl-2-nitrobenzyl alcohol                                                               |
| 266.1481 | 265.158 | 0.0171  | 266.1652 | 96  | 56   | Acridine Orange                                                                              |
| 266.1481 | 265.168 | 0.027   | 266.1751 | 103 | 45.1 | Oxprenolol                                                                                   |
| 266.1481 | 265.168 | 0.027   | 266.1751 | 96  | 100  | Oxprenolol                                                                                   |
| 266.1481 | 265.168 | 0.027   | 266.1751 | 93  | 45.5 | Oxprenolol                                                                                   |
| 205.1202 | 204.072 | -0.0408 | 205.0794 | 151 | 38.3 | Levamisole                                                                                   |
| 205.1202 | 408.223 | -0.001  | 205.119  | 147 | 37.3 | Pro-His-Arg                                                                                  |
| 205.1202 | 204.072 | -0.0408 | 205.0794 | 383 | 51.3 | Tetramisole                                                                                  |
| 205.1202 | 204.09  | -0.023  | 205.0972 | 205 | 96.3 | Fenozolone                                                                                   |
| 205.1202 | 222.1   | -0.023  | 205.0972 | 201 | 68.9 | Gly-Phe                                                                                      |
| 205.1202 | 204.09  | -0.023  | 205.0972 | 208 | 66.6 | Fenozolone                                                                                   |
| 205.1202 | 204.09  | -0.023  | 205.0972 | 248 | 47.3 | Fenozolone                                                                                   |
| 428.2804 | 1284    | -0.0503 | 428.2301 | 25  | 60.8 | DRVYVHPFHL/3                                                                                 |
| 310.1687 | 309.169 | 0.0074  | 310.1761 | 73  | 66.9 | Tyr-Lys                                                                                      |
| 310.1687 | 309.134 | -0.0274 | 310.1413 | 162 | 72   | Fluoxetine                                                                                   |
| 310.1687 | 309.119 | -0.043  | 310.126  | 62  | 51.2 | 10H-Benzo[4,5]cyclohepta[1,2-b]thiophen-10-one, 4,9-dihydro-4-(1-methyl-4-piperidinylidene)- |
| 310.1687 | 309.134 | -0.0274 | 310.1413 | 189 | 90.3 | Fluoxetine                                                                                   |
| 310.1846 | 309.169 | -0.0085 | 310.1761 | 82  | 74.3 | Tyr-Lys                                                                                      |
| 310.1846 | 327.22  | 0.0319  | 310.2165 | 107 | 82.5 | Butorphanol                                                                                  |
| 310.1846 | 327.22  | 0.0319  | 310.2165 | 144 | 86.7 | Butorphanol                                                                                  |
| 310.1846 | 309.194 | 0.0167  | 310.2013 | 47  | 76.9 | Metipranolol                                                                                 |
| 266.1425 | 265.158 | 0.0227  | 266.1652 | 93  | 100  | Acridine Orange                                                                              |
| 266.1425 | 0       | 0.03    | 266.17   | 131 | 100  | antazoline                                                                                   |
| 266.1425 | 265     | -0.02   | 266.12   | 188 | 81.2 | Thiamine hydrochloride                                                                       |
| 238.1311 | 237.092 | -0.0318 | 238.0993 | 163 | 37.7 | Ketamine                                                                                     |
| 238.1311 | 215.091 | -0.0513 | 238.0798 | 122 | 24.6 | 4-Ethyl-2E-(hydroxyimino)-5-nitro-3E-hexenamide                                              |
| 238.1311 | 237.103 | -0.0203 | 238.1108 | 126 | 36.5 | 3-(Cyclohexylamino)-2-hydroxy 1-propanesulfonic acid                                         |
| 238.1311 | 237.092 | -0.0318 | 238.0993 | 156 | 56.9 | Ketamine                                                                                     |
| 257.1363 | 256.117 | -0.0119 | 257.1244 | 63  | 54.7 | Thr-His                                                                                      |
| 257.1363 | 256.117 | -0.0119 | 257.1244 | 106 | 22.4 | Thr-His                                                                                      |
| 257.1363 | 256.117 | -0.0119 | 257.1244 | 141 | 25.7 | Thr-His                                                                                      |
| 257.1363 | 256.11  | -0.0191 | 257.1172 | 203 | 68.2 | Pterostilbene                                                                                |
| 276.1945 | 275.148 | -0.0391 | 276.1554 | 72  | 37.2 | Glu-Lys                                                                                      |
| 276.1945 | 275.152 | -0.0351 | 276.1594 | 116 | 46.7 | Methylenedioxypropylvalerone                                                                 |
| 276.1945 | 275.152 | -0.0351 | 276.1594 | 123 | 40.5 | Methylenedioxypropylvalerone                                                                 |
| 276.1945 | 275.152 | -0.0351 | 276.1594 | 132 | 72.7 | Methylenedioxypropylvalerone                                                                 |
| 276.1945 | 319.133 | -0.0438 | 276.1507 | 115 | 39.1 | Norfloxacin                                                                                  |
| 276.1945 | 275.152 | -0.0351 | 276.1594 | 221 | 90.1 | Methylenedioxypropylvalerone                                                                 |



|          |         |         |          |     |      |                                |
|----------|---------|---------|----------|-----|------|--------------------------------|
| 276.1945 | 275.163 | -0.0238 | 276.1707 | 108 | 49.1 | Physostigmine                  |
| 276.1945 | 275.163 | -0.0238 | 276.1707 | 140 | 81.2 | Physostigmine                  |
| 276.1945 | 275.159 | -0.0279 | 276.1666 | 221 | 76.4 | Arg-Thr                        |
| 276.1945 | 275.159 | -0.0279 | 276.1666 | 150 | 70.1 | Arg-Thr                        |
| 276.1945 | 275.152 | -0.0351 | 276.1594 | 101 | 58.2 | Methylenedioxypropylvalerone   |
| 276.1945 | 275.152 | -0.0351 | 276.1594 | 212 | 78.4 | Homatropine                    |
| 310.154  | 309.169 | 0.0221  | 310.1761 | 111 | 100  | Tyr-Lys                        |
| 310.154  | 309.106 | -0.0407 | 310.1133 | 122 | 100  | (-)-N-Acetylneuraminic acid    |
| 310.154  | 309.106 | -0.0407 | 310.1133 | 98  | 34   | (-)-N-Acetylneuraminic acid    |
| 310.154  | 309.106 | -0.0407 | 310.1133 | 59  | 55.4 | (-)-N-Acetylneuraminic acid    |
| 150.1003 | 303.147 | -0.009  | 150.0913 | 116 | 41.1 | Cocaine                        |
| 150.1003 | 149     | -0.02   | 150.08   | 263 | 36.7 | 3-Methyladenine                |
| 150.1003 | 167.058 | -0.045  | 150.055  | 322 | 73.5 | 3-Methyl-2-nitrobenzyl alcohol |
| 150.1003 | 167.095 | -0.009  | 150.0913 | 170 | 66.8 | Synephrine                     |
| 137.0419 | 136.039 | 0.0039  | 137.0458 | 176 | 31.3 | Allopurinol                    |
| 137.0419 | 0       | 0.03    | 137.07   | 100 | 16.6 | PRALIDOXIME                    |
| 137.0419 | 154.027 | -0.0186 | 137.0233 | 195 | 61.9 | Gentisic acid                  |
| 137.0419 | 136.039 | 0.0039  | 137.0458 | 289 | 39.4 | Hypoxanthine                   |
| 131.082  | 0       | 0.05    | 131.13   | 316 | 42.3 | Agmatine                       |
| 131.082  | 130.027 | -0.0481 | 131.0339 | 233 | 25.4 | Butanedioic acid, methylene-   |
| 131.082  | 131.13  | 0.0476  | 131.1296 | 98  | 100  | Chlormequat-d9                 |
| 131.082  | 130.063 | -0.0117 | 131.0703 | 67  | 55.4 | 4-Oxohexanoic acid             |
| 257.123  | 256.117 | 0.0014  | 257.1244 | 84  | 88.5 | Thr-His                        |
| 257.123  | 256.11  | -0.0058 | 257.1172 | 194 | 93.2 | Pterostilbene                  |
| 257.123  | 256.117 | 0.0014  | 257.1244 | 259 | 28.3 | His-Thr                        |
| 257.123  | 256.117 | 0.0014  | 257.1244 | 165 | 48.3 | Thr-His                        |
| 150.0885 | 149.07  | -0.0111 | 150.0774 | 289 | 92.5 | Adenine, N6-methyl             |
| 150.0885 | 167.058 | -0.034  | 150.055  | 307 | 75.3 | 3-Methyl-2-nitrobenzyl alcohol |
| 150.0885 | 149.07  | -0.0111 | 150.0774 | 255 | 50   | Adenine, N6-methyl             |
| 150.0885 | 167.095 | 0.0028  | 150.0913 | 241 | 49.6 | Synephrine                     |
| 238.1427 | 237.136 | 0.0011  | 238.1438 | 124 | 50   | Viloxazine                     |
| 238.1427 | 474.234 | -0.0185 | 238.1242 | 128 | 39.7 | His-Tyr-Arg                    |
| 238.1427 | 474.234 | -0.0185 | 238.1242 | 224 | 41.4 | Trp-Asn-Arg                    |
| 238.1427 | 0       | -0.05   | 238.09   | 291 | 91.2 | Biopterin                      |
| 257.1363 | 256.117 | -0.0119 | 257.1244 | 175 | 62.3 | Thr-His                        |
| 257.1363 | 256.11  | -0.0191 | 257.1172 | 97  | 50.9 | Pterostilbene                  |
| 257.1363 | 256.117 | -0.0119 | 257.1244 | 236 | 65.3 | Thr-His                        |
| 131.0774 | 0       | 0.05    | 131.13   | 207 | 36.8 | Agmatine                       |
| 131.0774 | 130     | 0.05    | 131.13   | 54  | 39.3 | Agmatine sulfate salt          |
| 131.0774 | 148.052 | -0.0283 | 131.0491 | 82  | 100  | trans-Cinnamic acid            |
| 150.0885 | 303.147 | 0.0028  | 150.0913 | 200 | 70.8 | Cocaine                        |
| 150.0885 | 303.147 | 0.0028  | 150.0913 | 242 | 55.4 | Cocaine                        |
| 150.0885 | 167.095 | 0.0028  | 150.0913 | 86  | 57.8 | Synephrine                     |
| 150.0885 | 149.07  | -0.0111 | 150.0774 | 166 | 79.2 | Adenine, N6-methyl             |

|          |         |         |          |     |      |                                                |
|----------|---------|---------|----------|-----|------|------------------------------------------------|
| 419.3108 | 418.308 | 0.0048  | 419.3156 | 205 | 100  | 1,2-Benzenedicarboxylic acid, dinonyl ester    |
| 150.0803 | 149.07  | -0.0029 | 150.0774 | 195 | 70.8 | Adenine, N6-methyl                             |
| 150.0803 | 167.095 | 0.011   | 150.0913 | 279 | 92.3 | Synephrine                                     |
| 150.0803 | 149.12  | 0.0474  | 150.1277 | 299 | 46   | Methamphetamine                                |
| 150.0803 | 149.07  | -0.0029 | 150.0774 | 231 | 95.3 | Adenine, N6-methyl                             |
| 211.116  | 210.126 | 0.0169  | 211.1329 | 112 | 45.3 | Jasmonic Acid                                  |
| 211.116  | 420.201 | -0.0083 | 211.1077 | 89  | 33.7 | PyroGlu-Tyr-Lys                                |
| 211.116  | 420.223 | 0.003   | 211.119  | 225 | 55.5 | His-His-Lys                                    |
| 211.116  | 0       | -0.02   | 211.1    | 65  | 100  | Sinapyl alcohol                                |
| 205.1202 | 204.09  | -0.023  | 205.0972 | 41  | 100  | Fenozolone                                     |
| 205.1202 | 204.075 | -0.0383 | 205.0819 | 207 | 27.5 | Ala-Asp                                        |
| 205.1202 | 408.212 | -0.0069 | 205.1133 | 199 | 22.1 | Phe-Ser-Arg                                    |
| 205.1202 | 204.09  | -0.023  | 205.0972 | 247 | 49.9 | Fenozolone                                     |
| 176.1195 | 175.063 | -0.0489 | 176.0706 | 100 | 43.7 | 3-Indoleacetic acid                            |
| 176.1195 | 175     | -0.05   | 176.07   | 124 | 76.2 | 1-Methoxy-3-carbaldehyde                       |
| 176.1195 | 175.096 | -0.017  | 176.103  | 85  | 44   | L-Citrulline                                   |
| 176.1195 | 175     | -0.05   | 176.07   | 98  | 70.2 | 1-Methoxy-3-carbaldehyde                       |
| 205.1202 | 204.072 | -0.0408 | 205.0794 | 161 | 54.8 | Levamisole                                     |
| 205.1202 | 204.1   | -0.013  | 205.107  | 270 | 53.2 | 1,6-Anhydro-b-D-glucose, permethyl-            |
| 205.1202 | 204.072 | -0.0408 | 205.0794 | 337 | 44.8 | Levamisole                                     |
| 205.1202 | 204.075 | -0.0383 | 205.0819 | 79  | 100  | Gly-Glu                                        |
| 205.1202 | 204.072 | -0.0408 | 205.0794 | 210 | 51   | Levamisole                                     |
| 205.1202 | 408.212 | -0.0069 | 205.1133 | 244 | 49.8 | Tyr-Ala-Arg                                    |
| 205.1202 | 204.072 | -0.0408 | 205.0794 | 169 | 39.9 | Tetramisole                                    |
| 176.0975 | 175     | -0.03   | 176.07   | 125 | 54.6 | 1-Methoxy-3-carbaldehyde                       |
| 176.0975 | 175     | -0.03   | 176.07   | 46  | 79.3 | 1-Methoxy-3-carbaldehyde                       |
| 176.0975 | 175     | -0.03   | 176.07   | 96  | 40.6 | 1-Methoxy-3-carbaldehyde                       |
| 176.0975 | 175.063 | -0.0269 | 176.0706 | 225 | 56.7 | 3-Indoleacetic acid                            |
| 283.1402 | 282.179 | 0.0462  | 283.1864 | 206 | 52.5 | 1,3-Bis(tris(hydroxymethyl)methylamino)propane |
| 283.1402 | 282.179 | 0.0462  | 283.1864 | 208 | 39.3 | 1,3-Bis(tris(hydroxymethyl)methylamino)propane |
| 283.1402 | 282.122 | -0.0113 | 283.1289 | 238 | 42.1 | Thr-Tyr                                        |
| 283.1402 | 0       | 0.01    | 283.15   | 192 | 32.9 | Artemisinin                                    |
| 283.1685 | 282.179 | 0.0179  | 283.1864 | 191 | 52.7 | 1,3-Bis(tris(hydroxymethyl)methylamino)propane |
| 283.1685 | 282.122 | -0.0396 | 283.1289 | 270 | 63.7 | Thr-Tyr                                        |
| 283.1685 | 282.122 | -0.0396 | 283.1289 | 222 | 31.9 | Thr-Tyr                                        |
| 283.1685 | 282.179 | 0.0179  | 283.1864 | 275 | 69   | 1,3-Bis(tris(hydroxymethyl)methylamino)propane |
| 150.0756 | 167.095 | 0.0157  | 150.0913 | 154 | 58   | Synephrine                                     |

|          |         |         |          |     |      |                                     |
|----------|---------|---------|----------|-----|------|-------------------------------------|
| 150.0756 | 149.07  | 0.0018  | 150.0774 | 236 | 61.8 | Adenine, N6-methyl                  |
| 150.0756 | 149.07  | 0.0018  | 150.0774 | 162 | 68.4 | Adenine, N6-methyl                  |
| 150.0756 | 167.095 | 0.0157  | 150.0913 | 311 | 78   | Synephrine                          |
| 205.1202 | 204.075 | -0.0383 | 205.0819 | 76  | 100  | Gly-Glu                             |
| 205.1202 | 204.075 | -0.0383 | 205.0819 | 173 | 82.6 | Gly-Glu                             |
| 205.1202 | 204.1   | -0.013  | 205.107  | 118 | 33.8 | 1,6-Anhydro-b-D-glucose, permethyl- |
| 205.1202 | 408.237 | 0.0057  | 205.1259 | 319 | 51.9 | Tyr-Val-Lys                         |
| 176.0975 | 175     | -0.03   | 176.07   | 148 | 100  | 1-Methoxy-3-carbaldehyde            |
| 176.0975 | 175     | -0.03   | 176.07   | 124 | 48   | 1-Methoxy-3-carbaldehyde            |
| 176.0975 | 175     | -0.03   | 176.07   | 30  | 100  | 1-Methoxy-3-carbaldehyde            |
| 176.0975 | 175.111 | 0.0207  | 176.1182 | 43  | 100  | Debrisoquin                         |
| 276.1945 | 275.159 | -0.0279 | 276.1666 | 135 | 43.3 | Arg-Thr                             |
| 276.1945 | 319.133 | -0.0438 | 276.1507 | 182 | 86.1 | Norfloxacin                         |
| 276.1945 | 275.152 | -0.0351 | 276.1594 | 172 | 94.6 | Methylenedioxyprovalerone           |
| 276.1945 | 275.163 | -0.0238 | 276.1707 | 153 | 80.3 | Physostigmine                       |
| 276.1945 | 319.133 | -0.0438 | 276.1507 | 118 | 27.6 | Norfloxacin                         |
| 276.1945 | 275.159 | -0.0279 | 276.1666 | 98  | 24.7 | Thr-Arg                             |
| 276.1945 | 275.148 | -0.0391 | 276.1554 | 113 | 40.7 | Glu-Lys                             |
| 276.1945 | 275.152 | -0.0351 | 276.1594 | 167 | 80.3 | Methylenedioxyprovalerone           |
| 276.1945 | 275.152 | -0.0351 | 276.1594 | 124 | 31.4 | Methylenedioxyprovalerone           |
| 276.1945 | 275.159 | -0.0279 | 276.1666 | 156 | 47   | Arg-Thr                             |
| 276.1945 | 275.152 | -0.0351 | 276.1594 | 174 | 52.7 | Homatropine                         |
| 276.1945 | 275.152 | -0.0351 | 276.1594 | 213 | 69.9 | Homatropine                         |
| 205.1202 | 204.075 | -0.0383 | 205.0819 | 105 | 100  | Gly-Glu                             |

**Table A13.** List of non-volatile metabolites (LC/MS) for managed population animals with manually identified best tentative match(es) given for each compound. Samples collected in Dec 2011 from multiple animals were pooled. Experiment was conducted using lipids fraction protocol analysis on RP column in positive ion mode (refer to Materials and Methods section in the main text). All matches are tentative.

\* For the compounds marked with an asterisk, the suggested chemical identity is highly tentative due to one or more of the following factors: an unexpected precursor; identified compound is not expected to be present in a marine environment; MS/MS is not available due to the low parent abundance and exact mass match is used for ID. In the latter case, the METLIN score is not available (N/A) and the  $\Delta$ ppm from the expected mass is given instead.

| Name of Chemical                       | Precursor | Structure                                                                           | METLIN Score | Precursor m/z: |
|----------------------------------------|-----------|-------------------------------------------------------------------------------------|--------------|----------------|
| Betaine                                | M+H       | 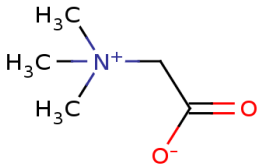   | 17-60        | 118.087        |
| 3-thio-pheneacrylic acid methyl ester* | M+NH4     |  | 39-44        | 186.059        |
| L-Valine*                              | M+Na      |  | 0            | 140.069        |

|                                     |                            |                                                                                      |       |                                          |
|-------------------------------------|----------------------------|--------------------------------------------------------------------------------------|-------|------------------------------------------|
| L-Ornithine                         | M+H-2H <sub>2</sub> O      | 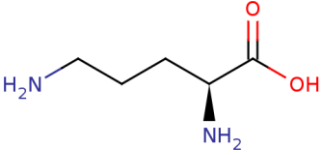   | 20    | 97.0773676 ; m/z of molecule:<br>97.0771 |
| Unidentified Compound 1             |                            |                                                                                      |       | 144.983                                  |
| Bufexamac                           | M+H                        |    | 41-50 | 224.129                                  |
| N-Carboxyethyl-γ-aminobutyric acid* | M+H-2H <sub>2</sub> O      |  | 25    | 140.069                                  |
| Cerulenin                           | M+H                        |  | 52    | 224.129                                  |
| Dimethylformamide                   | M+CH <sub>3</sub> O<br>H+H |   | 20-29 | 106.087                                  |

|                                              |                       |                                                                                      |                       |         |
|----------------------------------------------|-----------------------|--------------------------------------------------------------------------------------|-----------------------|---------|
| Arg His Leu                                  | M+H+Na                | 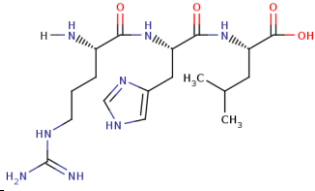   | 52                    | 224.129 |
| Ile His Arg                                  | M+H+Na                |    | 40                    | 224.129 |
| Unidentified Compound 2                      | M+2H                  |                                                                                      | N/A<br>$\Delta$ ppm=3 | 243.186 |
| 1-(2-hydroxyethyl)-1-methylguanidine*        | M+H                   |   | 12                    | 118.096 |
| Unidentified Compound 3                      |                       |                                                                                      |                       | 139.06  |
| Dodeca-2(E),4(E)-dienoic acid isobutylamide* | M+H-2H <sub>2</sub> O |  | 21                    | 216.205 |

|                                                                                       |                                                                                                            |                                                                                                                                                                                                                                                                                                                                                            |                                                                                                                   |         |
|---------------------------------------------------------------------------------------|------------------------------------------------------------------------------------------------------------|------------------------------------------------------------------------------------------------------------------------------------------------------------------------------------------------------------------------------------------------------------------------------------------------------------------------------------------------------------|-------------------------------------------------------------------------------------------------------------------|---------|
| 3,5-Diprenyl-4-hydroxyacetophenone, Lauric acid ethyl ester, or Isobutyryl carnitine* | Lauric acid ethyl ester (M+H); Isobutyryl carnitine (M+ACN+H) 3,5-Diprenyl-4-Hydroxyacetophenone (M+2Na-H) | 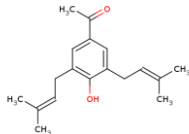 <p>3,5-DIPRENYL-4-HYDROXYACETOPHENONE</p>  <p>Isobutyryl carnitine</p>  <p>Lauric Acid ethyl ester</p> | Lauric acid ethyl ester score: 54; Isobutyryl carnitine score: 49 3,5-Diprenyl-4-Hydroxyacetophenone score: 39-44 | 273.178 |
| 8-methyl Nonanoic acid                                                                | M+Na                                                                                                       |                                                                                                                                                                                                                                                                        | 21-24                                                                                                             | 195.133 |
| Unidentified Compound 4 (Possibly a phosphatidylcholine)                              |                                                                                                            |                                                                                                                                                                                                                                                                                                                                                            |                                                                                                                   | 432.289 |
| Tenovin-1                                                                             | M+NH4                                                                                                      |                                                                                                                                                                                                                                                                         | 47-56                                                                                                             | 387.182 |

|                                                 |                   |                                                                                                                                                                                                           |       |         |
|-------------------------------------------------|-------------------|-----------------------------------------------------------------------------------------------------------------------------------------------------------------------------------------------------------|-------|---------|
| His Asp Lys or Lys<br>His Asp*                  | M+CH3O<br>H+H     | 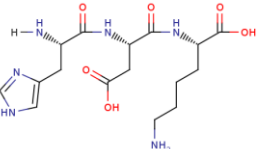 <p>His Asp Lys</p>  <p>Lys His Asp</p> | 36    | 431.219 |
| Gln Lys Glu                                     | M+H               |                                                                                                                         | 56    | 404.208 |
| cis- $\Delta^2$ -11-methyl-<br>dodecenoic acid* | M+NH <sub>4</sub> |                                                                                                                       | 19-24 | 244.228 |
| Cys Arg Met                                     | M+H               |                                                                                                                       | 55    | 409.163 |
| Gln Tyr Ala                                     | M+2Na-H           |                                                                                                                       | 40    | 425.138 |



|                         |                            |                                                                                      |       |         |
|-------------------------|----------------------------|--------------------------------------------------------------------------------------|-------|---------|
| Medica 16               | M+H                        | 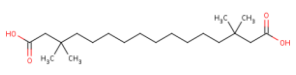   | 36-44 | 343.291 |
| Val Tyr Trp             | M+H-2H <sub>2</sub> O      |    | 54    | 431.214 |
| Pro Ala Arg             | M+2Na-H                    |   | 57    | 387.176 |
| Unidentified Compound 5 |                            |                                                                                      |       | 118.082 |
| Lactacystin*            | M+CH <sub>3</sub> O<br>H+H |  | 44    | 409.158 |
| His Leu Cys             | M+CH <sub>3</sub> O<br>H+H |  | 61    | 404.202 |

|                            |       |                                                                                      |                        |         |
|----------------------------|-------|--------------------------------------------------------------------------------------|------------------------|---------|
|                            |       | 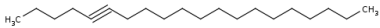   |                        |         |
| 5-Eicosyne*                | M+Na  |                                                                                      | N/A $\Delta$ ppm<br>=2 | 301.286 |
|                            |       |    |                        |         |
| Ile Met Tyr                | M+NH4 |                                                                                      | 39                     | 443.235 |
| Unidentified Molecule<br>6 |       |                                                                                      |                        | 285.291 |
|                            |       |  |                        |         |
| DG(15:0/0:0/15:0)<br>(d5)  | M+Na  |                                                                                      | N/A<br>$\Delta$ ppm=6  | 558.419 |
|                            |       |  |                        |         |
| (-)-Malyngolide            | M+NH4 |                                                                                      | 44                     | 288.26  |
|                            |       |  |                        |         |
| cis-7-hexadecenoic<br>acid | M+NH4 |                                                                                      | 31                     | 272.263 |
|                            |       |  |                        |         |
| 7Z-Tetradecen-1-ol*        | M+NH4 |                                                                                      | N/A<br>$\Delta$ ppm=19 | 230.252 |

|                                               |                                      |                                                                                      |                |         |
|-----------------------------------------------|--------------------------------------|--------------------------------------------------------------------------------------|----------------|---------|
| 9-OxoOTrE                                     | M+NH <sub>4</sub>                    | 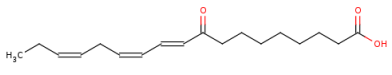   | 35             | 310.24  |
| 2-Benzimidazolylguanidine*                    | [M+H-2H <sub>2</sub> O] <sup>+</sup> |    | N/A<br>Δppm=19 | 140.073 |
| (-)-Malyngolide                               | M+NH <sub>4</sub>                    |    | 41             | 288.255 |
| N-cis-tetradec-9Z-enoyl-L-homoserine lactone  | M+H                                  |  | 22             | 310.236 |
| cis-Δ <sup>2</sup> -11-methyl-dodecenoic acid | M+NH <sub>4</sub>                    |  | 17             | 244.228 |
| AM3102                                        | M+H-2H <sub>2</sub> O                |  | 17             | 304.302 |

|                                          |                            |                                                                                                                                                                                                                                                                                                                                              |                        |         |
|------------------------------------------|----------------------------|----------------------------------------------------------------------------------------------------------------------------------------------------------------------------------------------------------------------------------------------------------------------------------------------------------------------------------------------|------------------------|---------|
| N-HBG*                                   | M+ACN+<br>Na               | 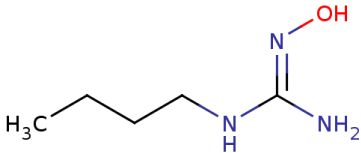                                                                                                                                                                                                                                                           | 29                     | 195.124 |
| Teinimine,<br>Tomatidine, or<br>Isomers* | M+H-<br>2H <sub>2</sub> O  |  <p style="text-align: center; border: 1px solid black; padding: 5px;">Tomatidine</p>  <p style="text-align: center; border: 1px solid black; padding: 5px;">Teinimine</p> | N/a<br>$\Delta$ ppm=15 | 380.338 |
| Arg Pro Arg*                             | M+CH <sub>3</sub> O<br>H+H |                                                                                                                                                                                                                                                           | 41                     | 460.295 |
| Tobramycin                               | M+ACN+<br>H                |                                                                                                                                                                                                                                                          | 55                     | 509.288 |

|                                        |                       |                                                                                      |                |         |
|----------------------------------------|-----------------------|--------------------------------------------------------------------------------------|----------------|---------|
| Gly Lys Val                            | M+H-2H <sub>2</sub> O | 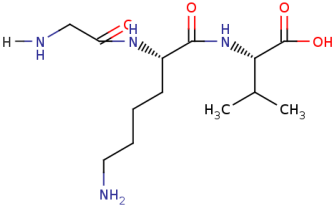   | 38             | 267.174 |
| Gln Trp His                            | M+NH <sub>4</sub>     |    | 43             | 487.233 |
| Phylloquinone*                         | M+NH <sub>4</sub>     |    | 23             | 468.393 |
| 1'H-5alpha-cholest-2-eno[3,2-β]indole* | M+H-2H <sub>2</sub> O |  | N/A<br>Δppm=19 | 424.366 |
| Malyngamide H                          | M+ACN+H               |  | 18             | 473.346 |
| Ambolic acid*                          | M+ACN+H               |  | N/A Δppm=15    | 512.418 |

|                            |               |                                                                                     |    |         |
|----------------------------|---------------|-------------------------------------------------------------------------------------|----|---------|
| 11-Ketorockogenin acetate* | M+2Na-H       | 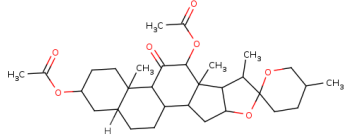  | 15 | 575.285 |
| 2-O-methyl PAF C-18        | M+CH3O<br>H+H |   | 17 | 556.443 |
| $\beta$ -Carotene          | M+ACN+<br>Na  |   | 33 | 600.469 |
| $\alpha$ -CEHC             | M+H           |  | 31 | 279.163 |
| Ile Phe Arg                | M+H-<br>2H2O  |  | 37 | 399.254 |
| C-8 Ceramide-1-phosphate*  | M+H-<br>H2O   |  | 14 | 488.36  |

|                                         |                          |                                                                                                                                                                                                                                                                                                                                                                                                                                                                                                                                                                                                             |                |         |
|-----------------------------------------|--------------------------|-------------------------------------------------------------------------------------------------------------------------------------------------------------------------------------------------------------------------------------------------------------------------------------------------------------------------------------------------------------------------------------------------------------------------------------------------------------------------------------------------------------------------------------------------------------------------------------------------------------|----------------|---------|
| Psychosine*                             | M+H-<br>H <sub>2</sub> O | 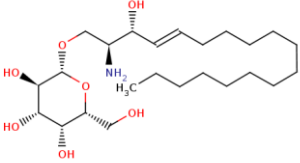                                                                                                                                                                                                                                                                                                                                                                                                                                                                                                                          | 23             | 444.335 |
| Lyso-PAF C-18*                          | M+Na                     |                                                                                                                                                                                                                                                                                                                                                                                                                                                                                                                           | 6              | 532.387 |
| 11β-Misoprostol                         | M+NH <sub>4</sub>        |                                                                                                                                                                                                                                                                                                                                                                                                                                                                                                                           | 35             | 400.31  |
| EPA                                     | M+NH <sub>4</sub>        |                                                                                                                                                                                                                                                                                                                                                                                                                                                                                                                          | 43             | 320.258 |
| Eicosyne, Icosyne, or isomer of either* | M+ACN+<br>Na             | <br><div style="border: 1px solid black; padding: 5px; width: fit-content; margin: 10px auto;">3-Eicosyne</div> <br><div style="border: 1px solid black; padding: 5px; width: fit-content; margin: 10px auto;">5-Eicosyne</div> <br><div style="border: 1px solid black; padding: 5px; width: fit-content; margin: 10px auto;">9-Eicosyne</div> | N/A;<br>Δppm=0 | 342.313 |

|                        |             |                                                                                                                                                                                                                                                                                                                                                                                                                                                                                                                                                                                                                           |                        |         |
|------------------------|-------------|---------------------------------------------------------------------------------------------------------------------------------------------------------------------------------------------------------------------------------------------------------------------------------------------------------------------------------------------------------------------------------------------------------------------------------------------------------------------------------------------------------------------------------------------------------------------------------------------------------------------------|------------------------|---------|
| Possibly a fatty acid* | M+NH4       | 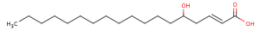 <p data-bbox="683 275 1024 390">2-Octadecenoic acid, 5-hydroxy-</p>  <p data-bbox="675 554 1060 674">18-hydroxy-9Z-octadecenoic acid</p>  <p data-bbox="672 816 1027 932">17-hydroxy-9Z-octadecenoic acid</p>  <p data-bbox="660 1073 1023 1171">9-hydroxy-12-octadecenoic acid</p> | N/A;<br>$\Delta$ ppm=6 | 316.287 |
| 3-ketosphingosine      | M+H         |                                                                                                                                                                                                                                                                                                                                                                                                                                                                                                                                        | 21                     | 298.276 |
| Piperцитine*           | M+H-<br>H2O |                                                                                                                                                                                                                                                                                                                                                                                                                                                                                                                                        | N/a;<br>$\Delta$ ppm=0 | 332.332 |



|                                                                           |                            |                                                                                                                                                                                                                                                                                                                                                                                                                                                                                                                                                                |                        |         |
|---------------------------------------------------------------------------|----------------------------|----------------------------------------------------------------------------------------------------------------------------------------------------------------------------------------------------------------------------------------------------------------------------------------------------------------------------------------------------------------------------------------------------------------------------------------------------------------------------------------------------------------------------------------------------------------|------------------------|---------|
| ICI 164384*                                                               | M+H                        | 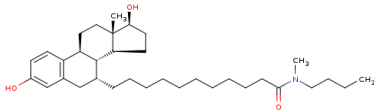                                                                                                                                                                                                                                                                                                                                                                                                                                                                             | N/a;<br>$\Delta$ ppm=7 | 526.43  |
| PC(O-16:0/O-4:0)[U]*                                                      | M+CH <sub>3</sub> O<br>H+H |                                                                                                                                                                                                                                                                                                                                                                                                                                                                              | N/a;<br>$\Delta$ ppm=0 | 570.45  |
| 3-dodecanoyl-NBD cholesterol                                              | M+ACN+<br>Na               |                                                                                                                                                                                                                                                                                                                                                                                                                                                                              | 88                     | 810.554 |
| Cetrimonium                                                               | M+H                        |                                                                                                                                                                                                                                                                                                                                                                                                                                                                            | 54                     | 284.331 |
| (25S)-5alpha-cholestan-3beta,4beta,6alpha,8beta,15alpha,16beta,26-heptol* | M+NH <sub>4</sub>          |  <div data-bbox="657 1476 1088 1606" style="border: 1px solid black; padding: 5px; margin: 10px 0;"> <p>(25S)-5alpha-cholestan-3beta,4beta,6alpha,8beta,15alpha,16beta,26-heptol</p> </div>  <div data-bbox="673 1774 1047 1963" style="border: 1px solid black; padding: 5px; margin: 10px 0;"> <p>(25S)-5alpha-cholestan-3beta,6alpha,7beta,8beta,15alpha,16beta,26-heptol</p> </div> | N/A;<br>$\Delta$ ppm=0 | 502.373 |

|                                 |                            |                                                                                      |                 |         |
|---------------------------------|----------------------------|--------------------------------------------------------------------------------------|-----------------|---------|
| 2-O-methyl PAF C-18             | M+Na                       | 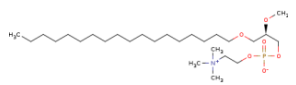   | 16              | 546.4   |
| PC(P-17:0/0:0)*                 | M+H-2H <sub>2</sub> O      |    | N/A;<br>Δppm=14 | 458.347 |
| PC(12:0/11:0)[U]*               | M+H-H <sub>2</sub> O       |    | N/A;<br>Δppm=12 | 590.426 |
| Arachidoyl glycine*             | M+CH <sub>3</sub> O<br>H+H |  | 82              | 402.359 |
| 1-Hexadecyl-2-O-methyl-glycerol | M+ACN+H                    |  | 53              | 372.35  |

|                                  |                          |                                                                                      |                       |         |
|----------------------------------|--------------------------|--------------------------------------------------------------------------------------|-----------------------|---------|
| Cholest-5-ene*                   | M+H-<br>H <sub>2</sub> O | 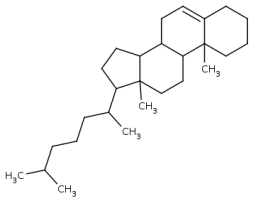    | N/A<br>$\Delta$ ppm=6 | 353.355 |
| Nb-<br>Arachidoyltryptamine<br>* | M+ACN+<br>H              |    | N/A<br>$\Delta$ ppm=8 | 496.422 |
| Unidentified Molecule<br>8       |                          |                                                                                      |                       | 540.452 |
| Unidentified Molecule<br>9       |                          |                                                                                      |                       | 326.38  |
| Hydroxynervonic<br>acid*         | M+ACN+<br>H              |  | N/A<br>$\Delta$ ppm=7 | 424.382 |
| N-acyl capnines*                 | M+H-<br>H <sub>2</sub> O |  | N/A<br>$\Delta$ ppm=3 | 584.473 |

|                                        |                            |                                                                                      |                       |         |
|----------------------------------------|----------------------------|--------------------------------------------------------------------------------------|-----------------------|---------|
| DG(14:1(9Z)/20:4(8Z,11Z,14Z,17Z)/0:0)* | M+ACN+H                    | 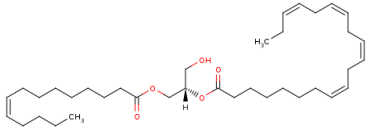   | N/A<br>$\Delta$ ppm=8 | 628.499 |
| 1'H-5alpha-cholest-2-eno[3,2-β]indole* | M+H-2H <sub>2</sub> O      |    | N/A<br>$\Delta$ ppm=8 | 424.37  |
| MG(20:0/0:0/0:0)*                      | M+ACN+H                    |  | N/a<br>$\Delta$ ppm=3 | 428.375 |
| N-stearoyl valine*                     | M+CH <sub>3</sub> O<br>H+H |  | N/a<br>$\Delta$ ppm=4 | 416.375 |
| C-6 Ceramide*                          | M+H                        |  | 17                    | 398.363 |
| Unidentified Molecule 10               |                            |                                                                                      |                       | 424.426 |

|                                                                |               |                                                                                      |                        |         |
|----------------------------------------------------------------|---------------|--------------------------------------------------------------------------------------|------------------------|---------|
| N-Heptanoylsolamine*                                           | M+CH3O<br>H+H | 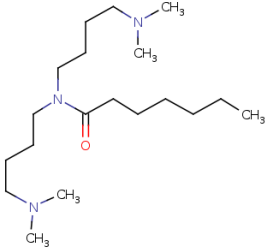   | N/a<br>$\Delta$ ppm=11 | 360.363 |
| Possibly a diglyceride such as DG(16:1(9Z)/0:0/16:1(9Z)) (d5)* | M+H-<br>H2O   |    | N/a<br>$\Delta$ ppm=15 | 542.442 |
| Ergosterol*                                                    | M+ACN+<br>H   |   | 9                      | 438.378 |
| 5-alpha-cholane*                                               | M+ACN+<br>Na  |   | N/A<br>$\Delta$ ppm=22 | 394.353 |
| 26,27-Dihomo-1 $\alpha$ -hydroxyvitamin D2*                    | M+ACN+<br>H   |   | N/A<br>$\Delta$ ppm=11 | 482.405 |
| Leu Lys His                                                    | M+H-<br>H2O   |  | 33                     | 379.239 |

|                                          |                            |                                                                                                             |                |         |
|------------------------------------------|----------------------------|-------------------------------------------------------------------------------------------------------------|----------------|---------|
|                                          |                            | 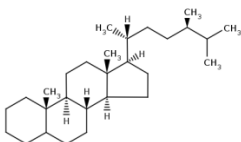 <p>Campestan skeleton</p> |                |         |
| Campestan skeleton or Ergostan skeleton* | M+H-H <sub>2</sub> O       |  <p>Ergostan skeleton</p>  | N/A<br>Δppm=6  | 369.386 |
| Alexidine*                               | M+ACN+H                    |                            | N/A<br>Δppm=13 | 550.495 |
| Unidentified Molecule 11                 |                            |                                                                                                             |                | 452.459 |
| ergostan-3β-ol*                          | M+H-H <sub>2</sub> O       |                         | N/A<br>Δppm=13 | 385.38  |
| Unidentified Molecule 12                 |                            |                                                                                                             |                | 312.363 |
| C-6 Ceramide                             | M+CH <sub>3</sub> O<br>H+H |                         | 18             | 430.39  |

|                          |                       |                                                                                      |                                |         |
|--------------------------|-----------------------|--------------------------------------------------------------------------------------|--------------------------------|---------|
| Hydroxynervonic acid*    | M+NH <sub>4</sub>     | 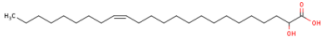   | N/A<br>$\Delta\text{ppm}=2$    | 400.38  |
| Oleamide                 | M+H                   |     | 52                             | 282.28  |
| A 80987*                 | M+H                   |    | N/A $\Delta\text{ppm}$<br>$=5$ | 654.333 |
| Amataine*                | M+H-2H <sub>2</sub> O |   | N/A $\Delta\text{ppm}$<br>$=2$ | 681.343 |
| Dihydro isorescinnamine* | M+H                   |   | N/A $\Delta\text{ppm}$<br>$=7$ | 637.307 |
| O-Arachidonoyl glycidol  | M+H-H <sub>2</sub> O  |  | 35                             | 393.299 |

|                                                |                   |                                                                                      |              |         |
|------------------------------------------------|-------------------|--------------------------------------------------------------------------------------|--------------|---------|
| Doxercalciferol*                               | M+NH <sub>4</sub> | 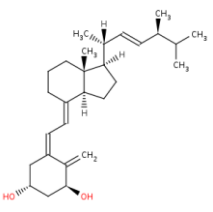    | 54           | 430.365 |
| Undecanoic acid                                | M+ACN+H           |     | 45           | 228.196 |
| Kalkitoxin                                     | M+ACN+H           |    | 44           | 408.309 |
| Unidentified Molecule 14                       |                   |                                                                                      |              | 689.491 |
| Unidentified Molecule 15                       |                   |                                                                                      |              | 623.452 |
| Unidentified Molecule 16                       |                   |                                                                                      |              | 601.441 |
| Docosanedioic acid*                            | M+H               |  | N/A Δppm =2  | 371.316 |
| (3b,24R,25x)-26-Benzoyloxystigmast-5-ene-3-ol* | M+H               |   | N/A Δppm =25 | 535.401 |
| Unidentified Molecule 17                       |                   |                                                                                      |              | 615.456 |



|                                                                                        |                                                                         |                                                                                                                                                                                                                                  |                 |         |
|----------------------------------------------------------------------------------------|-------------------------------------------------------------------------|----------------------------------------------------------------------------------------------------------------------------------------------------------------------------------------------------------------------------------|-----------------|---------|
| Val Leu Lys*                                                                           | M+CH <sub>3</sub> O<br>H+H                                              |                                                                                                                                                                                                                                  | 29              | 391.286 |
| 9-Oxoasimicinone*                                                                      | M+H                                                                     |                                                                                                                                                                                                                                  | N/A Δppm<br>=4  | 637.47  |
| Possibly a glycoside<br>such as Niazinin A or<br>Eruberin B*                           | Niazinin<br>A-<br>M+NH <sub>4</sub> ;<br>Eruberin<br>B-<br>M+ACN+<br>Na | <br><div style="border: 1px solid black; padding: 2px; display: inline-block; margin: 5px;">Niazinin A</div><br><br><br><div style="border: 1px solid black; padding: 2px; display: inline-block; margin: 5px;">Eruberin B</div> | N/A Δppm<br>=0  | 704.252 |
| Unidentified Molecule<br>20                                                            |                                                                         |                                                                                                                                                                                                                                  |                 | 659.482 |
| Parasiloxanthin*                                                                       | M+Na                                                                    |                                                                                                                                                                                                                                  | N/A Δppm<br>=14 | 593.442 |
| Possibly a<br>phosphatidic acid such<br>as PA(O-<br>16:0/20:5(5Z,8Z,11Z,<br>14Z,17Z))* | M+H                                                                     |                                                                                                                                                                                                                                  | N/A Δppm<br>=12 | 681.494 |
| Unidentified Molecule<br>19                                                            |                                                                         |                                                                                                                                                                                                                                  |                 | 725.522 |

|                                                                                                                                         |               |                                                                                      |                               |         |
|-----------------------------------------------------------------------------------------------------------------------------------------|---------------|--------------------------------------------------------------------------------------|-------------------------------|---------|
| Possibly a cardiolipid<br>such as CL(1'-<br>[16:0/18:1(11Z)],3'-<br>[16:0/18:1(11Z)])*                                                  | M+2H          | 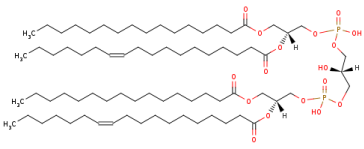   | N/A $\Delta$ ppm<br>=0        | 703.509 |
| Unidentified Molecule<br>20                                                                                                             |               |                                                                                      |                               | 571.432 |
| Unidentified Molecule<br>21                                                                                                             |               |                                                                                      |                               | 549.419 |
| Unidentified Molecule<br>22                                                                                                             |               |                                                                                      |                               | 368.428 |
| *HU-211*                                                                                                                                | M+CH3O<br>H+H |    | 8                             | 419.319 |
| Unidentified Molecule<br>23                                                                                                             |               |                                                                                      |                               | 992.742 |
| Lactosylceramide*                                                                                                                       | M+H           |  | score: N/A<br>$\Delta$ ppm=19 | 948.716 |
| Unidentified Molecule<br>23                                                                                                             |               |                                                                                      |                               | 505.39  |
| Possibly a triglyceride<br>such as<br>TG(22:3(10Z,13Z,16Z<br>)/22:5(7Z,10Z,13Z,16<br>Z,19Z)/22:6(4Z,7Z,10<br>Z,13Z,16Z,19Z))[iso6]<br>* | M+H+Na        |  | score: N/A<br>$\Delta$ ppm=9  | 527.403 |
| 13Z-Docosamide                                                                                                                          | M+H           |  | 37                            | 338.342 |

|                                                                    |                            |                                                                                      |                               |         |
|--------------------------------------------------------------------|----------------------------|--------------------------------------------------------------------------------------|-------------------------------|---------|
| Possibly a phosphatidylethanolamine such as PE(22:1(11Z)/19:0)*    | M+H                        | 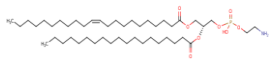   | score: N/A<br>$\Delta$ ppm=6  | 816.642 |
| Cyclopassifloic acid B*                                            | M+CH <sub>3</sub> O<br>H+H |    | score: N/A<br>$\Delta$ ppm=2  | 553.408 |
| Arg Arg Lys                                                        | M+H-<br>H <sub>2</sub> O   |    | 35                            | 441.301 |
| Possibly a phosphatidylinositols such as PI(O-16:0/22:2(13Z,16Z))* | M+H-<br>H <sub>2</sub> O   |  | score: N/A<br>$\Delta$ ppm=0  | 859.606 |
| 1-O-alpha-D-glucopyranosyl-1,2-nonadecandiol*                      | M+H                        |  | score: N/A<br>$\Delta$ ppm=10 | 859.606 |
| Heptane-1-thiol*                                                   | M+H-<br>2H <sub>2</sub> O  |  | score: N/A<br>$\Delta$ ppm=5  | 97.0839 |

|                                                               |               |                                                                                      |                                |         |
|---------------------------------------------------------------|---------------|--------------------------------------------------------------------------------------|--------------------------------|---------|
| Palmitoyl serinol                                             | M+ACN+<br>H   | 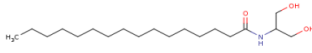   | 27                             | 371.324 |
| Betaine aldehyde                                              | M+H-<br>H2O   |    | 13-31                          | 84.0822 |
| Arachidoyl glycine                                            | M+ACN+<br>Na  |    | 85                             | 433.333 |
| 1,1'-(1,4-Dihydro-4-nonyl-3,5-pyridinediyl)bis[1-dodecanone]* | M+CH3O<br>H+H |    | score: N/A<br>$\Delta$ ppm =17 | 604.577 |
| Unidentified Molecule 25                                      |               |                                                                                      |                                | 560.551 |
| Cer(d18:0/17:0)*                                              | M+CH3O<br>H+H |  | score: N/A<br>$\Delta$ ppm =15 | 586.568 |
| Juliflorine*                                                  | M+H           |  | score: N/A<br>$\Delta$ ppm =0  | 630.593 |

|                                             |             |                                                                                      |                                |         |
|---------------------------------------------|-------------|--------------------------------------------------------------------------------------|--------------------------------|---------|
| Juliflorine*                                | M+H-<br>H2O | 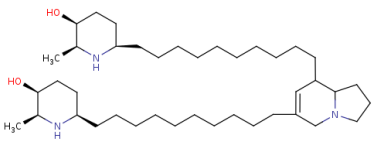   | score: N/A<br>$\Delta$ ppm =0  | 612.583 |
| 8-Methyl-3-hentriacontene*                  | M+NH4       |    | score: N/A<br>$\Delta$ ppm =2  | 466.536 |
| *Vitamin E succinate(Tocopherol succinate)* | M+Na        |  | score: N/A<br>$\Delta$ ppm =11 | 553.393 |
| Oceanin*                                    | M+2Na-H     |  | score: N/A<br>$\Delta$ ppm =3  | 531.409 |
| Unidentified Molecule<br>26                 |             |                                                                                      |                                | 578.563 |

|                                                          |               |                                                                                                                                                                                                                                                                                                                                                                    |                                |         |
|----------------------------------------------------------|---------------|--------------------------------------------------------------------------------------------------------------------------------------------------------------------------------------------------------------------------------------------------------------------------------------------------------------------------------------------------------------------|--------------------------------|---------|
| Possibly a Ceramide<br>such as Ceramide<br>(d18:1/25:0)* | M+2Na-H       | 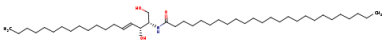 <p style="text-align: center; border: 1px solid black; padding: 5px;">Ceramide<br/>(d18:1/25:0)</p>  <p style="text-align: center; border: 1px solid black; padding: 5px;">Cer(d18:1/25:0)</p> | score: N/A<br>$\Delta$ ppm =1  | 708.623 |
| N-Oleoyl-D-erythro-<br>sphingosine (C18:1<br>Ceramide)*  | M+CH3O<br>H+H |                                                                                                                                                                                                                                                                                  | score: N/A<br>$\Delta$ ppm =5  | 582.549 |
| Heneicosanyl oleate*                                     | M+ACN+<br>Na  |                                                                                                                                                                                                                                                                                | score: N/A<br>$\Delta$ ppm =9  | 612.563 |
| Cer(d18:2/21:0)*                                         | M+H           |                                                                                                                                                                                                                                                                                 | score: N/A<br>$\Delta$ ppm =17 | 606.593 |
| Unidentified Molecule<br>27                              |               |                                                                                                                                                                                                                                                                                                                                                                    |                                | 608.577 |
| Phosphatidic acids<br>similar to<br>PA(12:0/12:0)[U]*    | M+CH3O<br>H+H |                                                                                                                                                                                                                                                                                | score: N/A<br>$\Delta$ ppm =1  | 569.38  |

|                                                |                      |                                                                                      |                                |         |
|------------------------------------------------|----------------------|--------------------------------------------------------------------------------------|--------------------------------|---------|
| Hemsleyin imine A*                             | M+H-H <sub>2</sub> O | 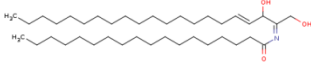   | score: N/A<br>$\Delta$ ppm =19 | 588.583 |
| Unidentified Molecule 28                       |                      |                                                                                      |                                | 632.609 |
| 14:0 Cholesteryl ester*                        | M+NH <sub>4</sub>    |    | score: N/A<br>$\Delta$ ppm =19 | 614.599 |
| Unidentified Molecule 29                       |                      |                                                                                      |                                | 632.609 |
| 2S,3R-didecanoyl-docosane-2,3-diol*            | M+H-H <sub>2</sub> O |    | score: N/A<br>$\Delta$ ppm =11 | 633.611 |
| *Cer(d18:1/23:0)*<br>due to large $\Delta$ ppm | M+Na                 |  | score: N/A<br>$\Delta$ ppm =11 | 658.624 |
| CE(16:0)*                                      | M+NH <sub>4</sub>    |  | score: N/A<br>$\Delta$ ppm =15 | 642.629 |
| Monocyclic botryococcane*                      | M+NH <sub>4</sub>    |  | score: N/A<br>$\Delta$ ppm =1  | 494.566 |

|                                                        |         |                                                                                      |                                |                                     |
|--------------------------------------------------------|---------|--------------------------------------------------------------------------------------|--------------------------------|-------------------------------------|
| Cer(d18:0/22:0)*                                       | M+Na    | 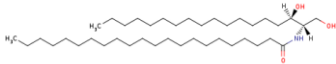   | score: N/A<br>$\Delta$ ppm =18 | 646.623                             |
| Cer(d18:0/25:0)*                                       | M+Na    |    | score: N/A<br>$\Delta$ ppm =16 | 688.669                             |
| Unidentified Molecule 30                               |         |                                                                                      |                                | 610.577                             |
| Diglycerides such as DG(20:0/16:1(9Z)/0:0)*            | M+NH4   |    | score: N/A<br>$\Delta$ ppm =1  | 640.587                             |
| Unidentified Molecule 31                               |         |                                                                                      |                                | 632.609                             |
| Ethylene glycol distearate*                            | M+ACN+H |  | score: N/A<br>$\Delta$ ppm =1  | 636.59347<br>53,<br>636.60247<br>80 |
| Possibly a Diglyceride such as DG(22:1(13Z)/15:0/0:0)* | M+NH4   |  | score: N/A<br>$\Delta$ ppm =21 | 654.589                             |
| Unidentified Molecule 32                               |         |                                                                                      |                                | 632.609                             |
| Possibly a Diglyceride such as DG(18:0/18:0/0:0)*      | M+ACN+H |  | score: N/A<br>$\Delta$ ppm =0  | 666.603                             |



|                                                         |               |                                                                                      |                                |         |
|---------------------------------------------------------|---------------|--------------------------------------------------------------------------------------|--------------------------------|---------|
| Cer(d18:0/23:0)*                                        | M+Na          | 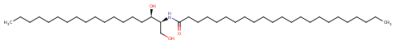   | score: N/A<br>$\Delta$ ppm =22 | 660.641 |
| Cer(d18:2/20:0)*                                        | M+CH3O<br>H+H |    | score: N/A<br>$\Delta$ ppm =0  | 624.593 |
| Cer(d18:2/23:0)*                                        | M+H           |    | score: N/A<br>$\Delta$ ppm =19 | 634.626 |
| Cholesteryl ester such as 13(S)-HODE cholesteryl ester* | M+NH4         |  | score: N/A<br>$\Delta$ ppm =11 | 682.621 |
| Tridodecylamine                                         | M+H           |  | score: N/A<br>$\Delta$ ppm =1  | 522.598 |
| Possibly a Ceramide such as Cer(d18:1/24:1(15Z))*       | M+H           |  | score: N/A<br>$\Delta$ ppm =15 | 648.639 |

|                                                        |               |                                                                                      |                                |         |
|--------------------------------------------------------|---------------|--------------------------------------------------------------------------------------|--------------------------------|---------|
| 3-Hydroxyphenylacetic acid                             | M+NH4         | 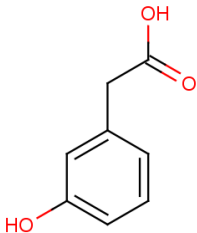    | 72                             | 170.079 |
| Gambieric acid D*                                      | M+NH4         |    | score: N/A<br>$\Delta$ ppm =13 | 1216.75 |
| Cer(d18:2/21:0)*                                       | M+CH3O<br>H+H |    | score: N/A<br>$\Delta$ ppm =0  | 638.609 |
| NeuAc-alpha-2-3-gal-beta-cer(d18:1/26:0)*              | M+ACN+<br>Na  |  | score: N/A<br>$\Delta$ ppm =11 | 1194.82 |
| Possibly a Diglyceride such as DG(20:1(11Z)/18:0/0:0)* | M+NH4         |  | score: N/A<br>$\Delta$ ppm =0  | 668.619 |
| Simonin III*                                           | M+H-<br>2H2O  |   | score: N/A<br>$\Delta$ ppm =18 | 1215.75 |
| Unidentified Molecule 33                               |               |                                                                                      |                                | 664.623 |

|                                                                           |                            |                                                                                      |                                |                 |
|---------------------------------------------------------------------------|----------------------------|--------------------------------------------------------------------------------------|--------------------------------|-----------------|
| alpha-Amyrin<br>palmitate*                                                | M+H                        | 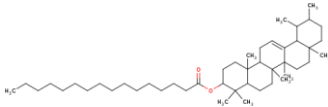   | score: N/A<br>$\Delta$ ppm =5  | 665.627         |
| 22-<br>Angeloylbarringtonen<br>ol C*                                      | M+H-<br>2H <sub>2</sub> O  |    | score: N/A<br>$\Delta$ ppm =0  | 537.395         |
| Possibly a<br>Diglyceride such as<br>DG(16:0/22:0/0:0)[iso<br>2]*         | M+ACN+<br>H                |    | score: N/A<br>$\Delta$ ppm =2  | 694.633         |
| Possibly a Diglyceride<br>such as<br>DG(14:1(9Z)/20:0/0:0<br>)*           | M+H-<br>2H <sub>2</sub> O  |  | score: N/A<br>$\Delta$ ppm =8  | 559.515         |
| N-(2R-<br>Hydroxypentacosanoy<br>l)-2S-amino-1,3S,4R-<br>octadecanetriol* | M+H-<br>2H <sub>2</sub> O  |  | score: N/A<br>$\Delta$ ppm =13 | 662.6542<br>969 |
| Possibly a<br>Phosphatidic acid such<br>as<br>PA(13:0/18:2(9Z,12Z)<br>)*  | M+CH <sub>3</sub> O<br>H+H |  | score: N/A<br>$\Delta$ ppm =5  | 663.456         |

|                                                                                  |          |                                                                                      |                               |         |
|----------------------------------------------------------------------------------|----------|--------------------------------------------------------------------------------------|-------------------------------|---------|
| Possibly a Phosphatidic acid such as PA(O-16:0/18:0)*                            | M+2Na-H  | 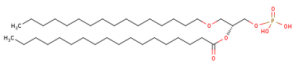   | score: N/A<br>$\Delta$ ppm =3 | 707.494 |
| 3-hexanoyl-NBD Cholesterol                                                       | M+Na     |    | 33                            | 685.437 |
| Possibly a Phosphatidylglycerol such as PG(19:1(9Z)/13:0)*                       |          |  | score: N/A<br>$\Delta$ ppm =8 | 721.508 |
| (3R,2'S)-Myxol 2'-(2,4-di-O-methyl- $\alpha$ -L-fucoside)*                       | M+H      |  | score: N/A<br>$\Delta$ ppm =5 | 759.524 |
| Possibly a Phosphatidylcholine such as PC(20:5(5Z,8Z,11Z,14Z,17Z)/18:2(9Z,12Z))* | M+H-2H2O |  | score: N/A<br>$\Delta$ ppm =0 | 768.533 |

|                                                                                                   |                       |                                                                                      |                        |         |
|---------------------------------------------------------------------------------------------------|-----------------------|--------------------------------------------------------------------------------------|------------------------|---------|
| Gal-alpha1-3-(GalNAc-beta1-4)-Gal-beta1-4-Glc-beta-cer(d18:1/26:1(17Z))*                          | M+H-H <sub>2</sub> O  | 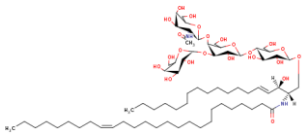   | score: N/A<br>Δppm =6  | 1347.88 |
| *Dimethyl dialkyl ammonium chloride                                                               | M+ACN+H               |    | score: N/A<br>Δppm =23 | 550.629 |
| Possibly a Triglyceride such as TG(19:0/22:4(7Z,10Z,13Z,16Z)/22:6(4Z,7Z,10Z,13Z,16Z,19Z))[is o6]* | M+H-2H <sub>2</sub> O |  | score: N/A<br>Δppm =4  | 961.806 |
| Betaine                                                                                           | M+Na                  |   | 40                     | 140.069 |
| 2-oxo-3-methylvaleric acid                                                                        | M+NH <sub>4</sub>     |  | 26-30                  | 148.097 |

|                                                                |              |                                                                                                                                                                                                                                                                                                                                                                                                                                                                                     |                                |         |
|----------------------------------------------------------------|--------------|-------------------------------------------------------------------------------------------------------------------------------------------------------------------------------------------------------------------------------------------------------------------------------------------------------------------------------------------------------------------------------------------------------------------------------------------------------------------------------------|--------------------------------|---------|
| Possibly a Ceramide<br>such as<br>Cer(d18:1/24:1(15Z))*        | M+H-<br>H2O  | 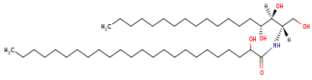                                                                                                                                                                                                                                                                                                                                                                                                  | score: N/A,<br>$\Delta$ ppm=0  | 666.641 |
| Possibly a Diglyceride<br>uch as<br>DG(22:0/18:1(9Z)/0:0<br>)* | M+NH4        |                                                                                                                                                                                                                                                                                                                                                                                                   | score: N/A,<br>$\Delta$ ppm=1  | 696.651 |
| Possibly a Ceramide<br>such as<br>Cer(d18:2/20:1)*             | M+ACN+<br>H  |                                                                                                                                                                                                                                                                                                                                                                                                 | score: N/A,<br>$\Delta$ ppm=2  | 631.576 |
| Vitamin D3 palmitate<br>or 16:1 Cholesteryl<br>ester*          | M+H-<br>2H2O |  <div data-bbox="675 1654 987 1734" style="border: 1px solid black; padding: 5px; margin: 10px auto; width: fit-content;">Vitamin D3 palmitate</div>  <div data-bbox="704 1940 1016 2020" style="border: 1px solid black; padding: 5px; margin: 10px auto; width: fit-content;">16:1 Cholesteryl ester</div> | score: N/A,<br>$\Delta$ ppm=12 | 587.549 |

|                                                       |             |                                                                                      |                                |         |
|-------------------------------------------------------|-------------|--------------------------------------------------------------------------------------|--------------------------------|---------|
| DG(16:0e/18:0/0:0)*                                   | M+H-<br>H2O | 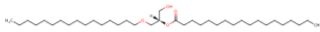   | score: N/A,<br>$\Delta$ ppm=19 | 565.567 |
| Possibly a ceramide<br>similar to<br>Cer(d18:0/18:0)* | M+ACN+<br>H |     | score: N/A,<br>$\Delta$ ppm=17 | 609.603 |
| Unidentified Chemical<br>34                           |             |                                                                                      |                                | 578.66  |
| 2-<br>demethylmenaquinone<br>-8<br>*                  | M+H         |   | score: N/A,<br>$\Delta$ ppm=3  | 703.547 |
| HU210                                                 | M+H-<br>H2O |  | 2 – 21                         | 371.297 |
| HU210                                                 | M+H-<br>H2O |  | 2 – 9                          | 371.293 |

|                                                                                             |               |                                                                                                                                                                                                                                                                                                                    |                       |         |
|---------------------------------------------------------------------------------------------|---------------|--------------------------------------------------------------------------------------------------------------------------------------------------------------------------------------------------------------------------------------------------------------------------------------------------------------------|-----------------------|---------|
| Glucosaminic acid                                                                           | M+CH3O<br>H+H | 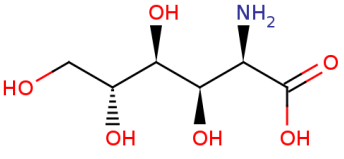 <p>The structure shows a six-carbon chain with a carboxylic acid group at C1, an amino group at C2, and hydroxyl groups at C3, C4, and C5. The C4 hydroxyl group is on a dashed bond, while the others are on wedged bonds.</p> | 5                     | 228.107 |
| Octylamine*                                                                                 | M+H           |  <p>A straight-chain alkane with an amino group at the end, labeled with H<sub>3</sub>C and NH<sub>2</sub>.</p>                                                                                                                  | N/A<br>$\Delta$ ppm=3 | 130.159 |
| 2-Pyrrolidinone                                                                             | M+H           |  <p>A five-membered ring containing one nitrogen atom and one carbonyl group.</p>                                                                                                                                               | 42                    | 86.0616 |
| Possibly a triglyceride such as TG(15:0/18:1(9Z))/16:1(9Z)[iso6]* based on exact mass match | M+Na          |  <p>A glycerol backbone esterified with three fatty acid chains: one saturated (15:0), one monounsaturated (18:1(9Z)), and one saturated (16:1(9Z)).</p>                                                                       | N/A<br>$\Delta$ ppm=1 | 825.694 |



|                   |             |                                                                                      |                       |         |
|-------------------|-------------|--------------------------------------------------------------------------------------|-----------------------|---------|
| HU210*            | M+H-<br>H2O | 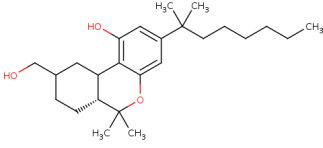   | H<br>U<br>2<br><br>15 | 371.289 |
| Pyroglutamic acid | M+ACN+<br>H |    | 94                    | 171.077 |
| 1-Hexanol         | M+H         |  | 37                    | 121.123 |
| 1-Hexanol         | M+H         |  | 27                    | 103.112 |
| Anacardic acid    | M+Na        |  | 6                     | 371.257 |



|                                                                   |                       |                                                                                      |       |                                                     |
|-------------------------------------------------------------------|-----------------------|--------------------------------------------------------------------------------------|-------|-----------------------------------------------------|
| L-Ornithine                                                       | M+H-2H <sub>2</sub> O | 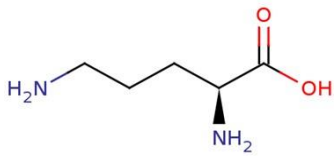   | 20    | 97.07736<br>76 ; m/z<br>of<br>molecule<br>: 97.0771 |
| Unidentified<br>Compound 1                                        |                       |                                                                                      |       | 144.983                                             |
| BUFEXAMAC                                                         | M+H                   |   | 41-50 | 224.129                                             |
| *N-Carboxyethyl- $\gamma$ -aminobutyric acid*<br>highly tentative | M+H-2H <sub>2</sub> O |  | 25    | 140.069                                             |
| Cerulenin (doubtful<br>due to ethylene oxide<br>ring)             | M+H                   |  | 52    | 224.129                                             |

|                                                                                                                |                        |                                                                                      |               |         |
|----------------------------------------------------------------------------------------------------------------|------------------------|--------------------------------------------------------------------------------------|---------------|---------|
| Dimethylformamide                                                                                              | M+CH <sub>3</sub> OH+H | 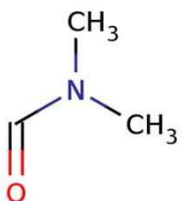    | 20-29         | 106.087 |
| Arg His Leu                                                                                                    | M+H+Na                 |    | 52            | 224.129 |
| Ile His Arg                                                                                                    | M+H+Na                 | Previously Included                                                                  | 40            | 224.129 |
| Unidentified Compound 2<br>(Perhaps 1-Hydroxyvitamin D3 diacetate or a chemical with similar structural motif) | M+2H                   |   | N/A<br>Δppm=3 | 243.186 |
| *1-(2-hydroxyethyl)-1-methylguanidine*<br>highly tentative                                                     | M+H                    |  | 12            | 118.096 |
| Unidentified Compound 3                                                                                        |                        |                                                                                      |               | 139.06  |

|                                                                                                                                                          |                                                                                                                  |                                                                                                                                                                                                                                                                                                                                                               |                                                                                                                          |                |
|----------------------------------------------------------------------------------------------------------------------------------------------------------|------------------------------------------------------------------------------------------------------------------|---------------------------------------------------------------------------------------------------------------------------------------------------------------------------------------------------------------------------------------------------------------------------------------------------------------------------------------------------------------|--------------------------------------------------------------------------------------------------------------------------|----------------|
| <p>*DODECA-2(E),4(E)-DIENOIC ACID ISOBUTYLAMIDE*<br/>Highly unlikely</p>                                                                                 | <p>M+H-2H<sub>2</sub>O</p>                                                                                       | 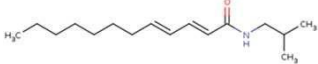                                                                                                                                                                                                                                                                            | <p>21</p>                                                                                                                | <p>216.205</p> |
| <p>All Tentative *3,5-DIPRENYL-4-HYDROXYACETOPHENONE, or Lauric Acid ethyl ester, or Isobutyryl carnitine* (results inconclusive to the most likely)</p> | <p>Lauric Acid ethyl ester (M+H); Isobutyryl carnitine(M+A CN+H)3,5-DIPRENYL-4-HYDROXYACETOPHENONE (M+2Na-H)</p> |  <p>3,5-DIPRENYL-4-HYDROXYACETOPHENONE</p>  <p>Isobutyryl carnitine</p>  <p>Lauric Acid ethyl ester</p> | <p>Lauric Acid ethyl ester score: 54; Isobutyryl carnitine score: 49 3,5-DIPRENYL-4-HYDROXYACETOPHENONE score: 39-44</p> | <p>273.178</p> |
| <p>8-methyl Nonanoic acid</p>                                                                                                                            | <p>M+Na</p>                                                                                                      |                                                                                                                                                                                                                                                                           | <p>21-24</p>                                                                                                             | <p>195.133</p> |

|                                           |                        |                                                                                                                                                                                                                                                                         |       |         |
|-------------------------------------------|------------------------|-------------------------------------------------------------------------------------------------------------------------------------------------------------------------------------------------------------------------------------------------------------------------|-------|---------|
| Unidentified<br>Compound 4                |                        |                                                                                                                                                                                                                                                                         |       | 432.289 |
| Tenovin-1                                 | M+NH <sub>4</sub>      | 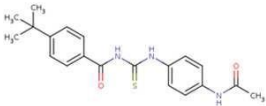                                                                                                                                                                                      | 47-56 | 387.182 |
| *His Asp Lys or Lys<br>His Asp* tentative | M+CH <sub>3</sub> OH+H |  <p data-bbox="675 968 945 1016">His Asp Lys</p>  <p data-bbox="766 1188 1006 1236">Lys His Asp</p> | 36    | 431.219 |
| Gln Lys Glu                               | M+H                    |                                                                                                                                                                                     | 56    | 404.208 |

|                                                                                   |                   |                                                                                      |       |         |
|-----------------------------------------------------------------------------------|-------------------|--------------------------------------------------------------------------------------|-------|---------|
| <p>*cis-<math>\Delta^2</math>-11-methyl-Dodecenoic Acid*<br/>Highly tentative</p> | M+NH <sub>4</sub> | 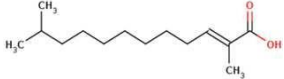   | 19-24 | 244.228 |
| Cys Arg Met                                                                       | M+H               |    | 55    | 409.163 |
| Gln Tyr Ala                                                                       | M+2Na-H           |  | 40    | 425.138 |
| MEDICA 16                                                                         | M+H               |  | 36-44 | 343.291 |

|                            |                        |                                                                                      |    |         |
|----------------------------|------------------------|--------------------------------------------------------------------------------------|----|---------|
| Val Tyr Trp                | M+H-2H <sub>2</sub> )  | 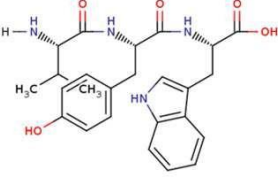   | 54 | 431.214 |
| Pro Ala Arg                | M+2Na-H                |    | 57 | 387.176 |
| Unidentified Compound 5    |                        |                                                                                      |    | 118.082 |
| *Lactacystin*<br>Tentative | M+CH <sub>3</sub> OH+H | Previously Included                                                                  | 44 | 409.158 |
| His Leu Cys                | M+CH <sub>3</sub> OH+H |  | 61 | 404.202 |



|                                                                    |               |                                                                                      |                                                     |                |
|--------------------------------------------------------------------|---------------|--------------------------------------------------------------------------------------|-----------------------------------------------------|----------------|
| <p>*5-Eicosyne*</p> <p>Tentative due to exact match, not MS/MS</p> | <p>*M+Na*</p> |    | <p>N/A</p> <p><math>\Delta\text{ppm} = 2</math></p> | <p>301.286</p> |
| <p>Ile Met Tyr</p>                                                 | <p>M+NH4</p>  |    | <p>39</p>                                           | <p>443.235</p> |
| <p>Unidentified Molecule 6</p>                                     |               |                                                                                      |                                                     | <p>285.291</p> |
| <p>DG(15:0/0:0/15:0) (d5)</p>                                      | <p>M+Na</p>   |  | <p>N/A</p> <p><math>\Delta\text{ppm} = 6</math></p> | <p>558.419</p> |
| <p>(-)-Malyngolide</p>                                             | <p>M+NH4</p>  |  | <p>44</p>                                           | <p>288.26</p>  |

|                                                                       |                                      |                                                                                      |                    |         |
|-----------------------------------------------------------------------|--------------------------------------|--------------------------------------------------------------------------------------|--------------------|---------|
| cis-7-Hexadecenoic Acid                                               | M+NH <sub>4</sub>                    | 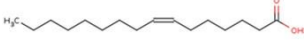   | 31                 | 272.263 |
| *7Z-Tetradecen-1-ol* from exact mass match                            | M+NH <sub>4</sub>                    |    | N/A<br>Δppm=1<br>9 | 230.252 |
| 9-OxoOTrE                                                             | M+NH <sub>4</sub>                    |   | 35                 | 310.24  |
| *2-Benzimidazolylguanine* tentative because based on exact mass match | [M+H-2H <sub>2</sub> O] <sup>+</sup> |  | N/A<br>Δppm=1<br>9 | 140.073 |
| (-)-Malyngolide                                                       | M+NH <sub>4</sub>                    |  | 41                 | 288.255 |

|                                                                       |                       |                                                                                      |    |         |
|-----------------------------------------------------------------------|-----------------------|--------------------------------------------------------------------------------------|----|---------|
| N-cis-tetradec-9Z-enoyl-L-Homoserine lactone(quorum sensing molecule) | M+H                   | 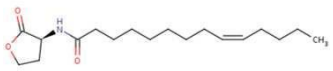   | 22 | 310.236 |
| cis-Δ <sup>2</sup> -11-methyl-Dodecenoic Acid                         | M+NH <sub>4</sub>     |    | 17 | 244.228 |
| AM3102                                                                | M+H-2H <sub>2</sub> O |  | 17 | 304.302 |
| *N-HBG* tentative                                                     | M+ACN+Na              |  | 29 | 195.124 |

|                                                                          |                             |                                                                                                                                                                                                                                                  |                                                          |                |
|--------------------------------------------------------------------------|-----------------------------|--------------------------------------------------------------------------------------------------------------------------------------------------------------------------------------------------------------------------------------------------|----------------------------------------------------------|----------------|
| <p>*Teinimine, tomatidine, or isomers* based on exact mass not MS/MS</p> | <p>M+H-2H<sub>2</sub>O</p>  | <div style="text-align: center;"> 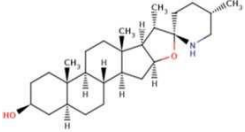 <p>Tomatidine</p>  <p>Teinimine</p> </div> | <p>score:<br/>N/a<br/><math>\Delta</math>ppm=1<br/>5</p> | <p>380.338</p> |
| <p>*Arg Pro Arg* tentative showing methanol but possible</p>             | <p>M+CH<sub>3</sub>OH+H</p> | <div style="text-align: center;">  </div>                                                                                                                     | <p>41</p>                                                | <p>460.295</p> |
| <p>Tobramycin</p>                                                        | <p>M+ACN+H</p>              | <div style="text-align: center;">  </div>                                                                                                                    | <p>55</p>                                                | <p>509.288</p> |

|                                                                                                 |                       |                                                                                      |                    |         |
|-------------------------------------------------------------------------------------------------|-----------------------|--------------------------------------------------------------------------------------|--------------------|---------|
| Gly Lys Val                                                                                     | M+H-2H <sub>2</sub> O | 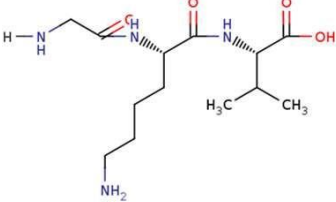   | 38                 | 267.174 |
| Gln Trp His                                                                                     | M+NH <sub>4</sub>     |    | 43                 | 487.233 |
| *Phylloquinone*<br>Highly tentative<br>based on ammonia<br>precursor                            | M+NH <sub>4</sub>     |  | 23                 | 468.393 |
| *1'H-5alpha-Cholest-<br>2-eno[3,2-b]indole*<br>Highly tentative<br>based on exact mass<br>match | M+H-2H <sub>2</sub> O |  | N/A<br>Δppm=1<br>9 | 424.366 |
| Malyngamide H                                                                                   | M+ACN+H               |  | 18                 | 473.346 |

|                                                                                             |                  |                                                                                      |                             |                |
|---------------------------------------------------------------------------------------------|------------------|--------------------------------------------------------------------------------------|-----------------------------|----------------|
| <p>*Ambolic Acid*<br/>HIGHLY tentative<br/>based on exact mass</p>                          | <p>M+ACN+H</p>   | 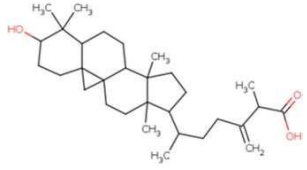   | <p>N/A<br/>Δppm<br/>=15</p> | <p>512.418</p> |
| <p>*11-KETOROCKOGENIN ACETATE*<br/>Highly tentative<br/>based on Precursor requirements</p> | <p>M+2Na-H</p>   |    | <p>15</p>                   | <p>575.285</p> |
| <p>2-O-methyl PAF C-18</p>                                                                  | <p>M+CH3OH+H</p> |   | <p>17</p>                   | <p>556.443</p> |
| <p>β-Carotene</p>                                                                           | <p>M+ACN+Na</p>  |  | <p>33</p>                   | <p>600.469</p> |
| <p>α-CEHC</p>                                                                               | <p>M+H</p>       |  | <p>31</p>                   | <p>279.163</p> |

|                                                                          |                       |                                                                                      |    |         |
|--------------------------------------------------------------------------|-----------------------|--------------------------------------------------------------------------------------|----|---------|
| Ile Phe Arg                                                              | M+H-2H <sub>2</sub> O | 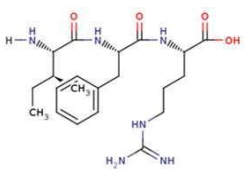    | 37 | 399.254 |
| *C-8 Ceramide-1-phosphate* highly tentative, not a great msms comparison | M+H-H <sub>2</sub> O  |     | 14 | 488.36  |
| *Psychosine* tentative                                                   | M+H-H <sub>2</sub> O  |   | 23 | 444.335 |
| *Lyso-PAFC-18* highly tentative based on low score a                     | M+Na                  |  | 6  | 532.387 |
| 11β-Misoprostol                                                          | M+NH <sub>4</sub>     |  | 35 | 400.31  |

|                                                                                          |          |                                                                                                                                                                                                                                                                                                                                                                                                                                                                                                                                                                                                                 |                              |         |
|------------------------------------------------------------------------------------------|----------|-----------------------------------------------------------------------------------------------------------------------------------------------------------------------------------------------------------------------------------------------------------------------------------------------------------------------------------------------------------------------------------------------------------------------------------------------------------------------------------------------------------------------------------------------------------------------------------------------------------------|------------------------------|---------|
| EPA                                                                                      | M+NH4    | 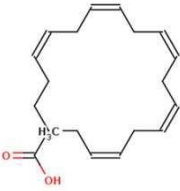                                                                                                                                                                                                                                                                                                                                                                                                                                                                                                                               | 43                           | 320.258 |
| *Eicosyne or Icosyne<br>Isomers* tentative<br>based on exact mass<br>match and precursor | M+ACN+Na |  <div data-bbox="678 764 1037 842" style="border: 1px solid black; padding: 5px; margin: 5px 0;">3-Eicosyne</div>  <div data-bbox="669 968 1024 1045" style="border: 1px solid black; padding: 5px; margin: 5px 0;">5-Eicosyne</div>  <div data-bbox="696 1171 1047 1249" style="border: 1px solid black; padding: 5px; margin: 5px 0;">9-Icosyne</div> | N/A;<br>$\Delta\text{ppm}=0$ | 342.313 |



|                                                                                                 |              |                                                                                                                                                                                                                                                                                                                                                                                                                                                                                                                                                                                                                                                                                                      |                                                                               |                |
|-------------------------------------------------------------------------------------------------|--------------|------------------------------------------------------------------------------------------------------------------------------------------------------------------------------------------------------------------------------------------------------------------------------------------------------------------------------------------------------------------------------------------------------------------------------------------------------------------------------------------------------------------------------------------------------------------------------------------------------------------------------------------------------------------------------------------------------|-------------------------------------------------------------------------------|----------------|
| <p>*Various alkenoic acids with hydroxy substituents* Highly tentative based on exact match</p> | <p>M+NH4</p> | <div style="text-align: center;">  <p><b>2-Octadecenoic acid, 5-hydroxy-</b></p> </div> <div style="text-align: center;">  <p><b>18-hydroxy-9Z-octadecenoic acid</b></p> </div> <div style="text-align: center;">  <p><b>17-hydroxy-9Z-octadecenoic acid</b></p> </div> <div style="text-align: center;">  <p><b>9-hydroxy-12-octadecenoic acid</b></p> </div> | <p>N/A;<br/>Δppm=6</p>                                                        | <p>316.287</p> |
| <p>3-ketosphingosine</p>                                                                        | <p>M+H</p>   | <div style="text-align: center;">  </div>                                                                                                                                                                                                                                                                                                                                                                                                                                                                                                                                                                         | <p>21<br/>(chose because precursor is M+H and MS/MS graphs appear closer)</p> | <p>298.276</p> |

|                                                                                                     |                        |                                                                                                                                                                    |                |         |
|-----------------------------------------------------------------------------------------------------|------------------------|--------------------------------------------------------------------------------------------------------------------------------------------------------------------|----------------|---------|
| <p><b>*Piperidine*</b><br/>Tentative based on source of chemical and exact mass match not MS/MS</p> | M+H-H <sub>2</sub> O   | 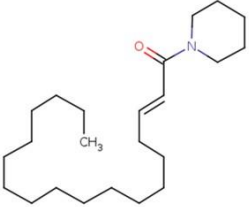                                                                                 | N/a;<br>Δppm=0 | 332.332 |
| <p><b>*ICI 164384*</b><br/>tentative based on exact mass match</p>                                  | M+H                    |                                                                                  | N/a;<br>Δppm=7 | 526.43  |
| <p><b>*PC(O-16:0/O-4:0)[U]*</b> or similar chemicals, highly tentative based on exact match</p>     | M+CH <sub>3</sub> OH+H |  <p>The hydrocarbon chain off of the substituent ether has variable length</p> | N/a;<br>Δppm=0 | 570.45  |
| <p>3-dodecanoyl-NBD<br/>Cholesterol</p>                                                             | M+ACN+Na               |                                                                                | 88             | 810.554 |
| <p>CETRIMONIUM</p>                                                                                  | M+H                    |                                                                                | 54             | 284.331 |

|                                                                                                                                                                                                                    |                       |                                                                                                                                                                                                                                                                                                                                                    |                 |         |
|--------------------------------------------------------------------------------------------------------------------------------------------------------------------------------------------------------------------|-----------------------|----------------------------------------------------------------------------------------------------------------------------------------------------------------------------------------------------------------------------------------------------------------------------------------------------------------------------------------------------|-----------------|---------|
| <p>*<b>(25S)</b>-5alpha-cholestan-3beta,4beta,6alpha,8beta,15alpha,16beta,26heptol*; *<b>(25S)</b>-5alpha-cholestan-3beta,6alpha,7beta,8beta,15alpha,16beta,26heptol* Both tentative based on exact mass match</p> | M+NH <sub>4</sub>     | 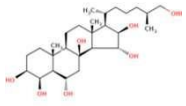 <p><b>(25S)-5alpha-cholestan-3beta,4beta,6alpha,8beta,15alpha,16beta,26-heptol</b></p>  <p><b>(25S)-5alpha-cholestan-3beta,6alpha,7beta,8beta,15alpha,16beta,26-heptol</b></p> | N/A;<br>Δppm=0  | 502.373 |
| 2-O-methyl PAF C-18                                                                                                                                                                                                | M+Na                  |                                                                                                                                                                                                                                                                | 16              | 546.4   |
| *PC(P-17:0/0:0)* highly tentative based on exact match and closer chemicals by mass                                                                                                                                | M+H-2H <sub>2</sub> O |                                                                                                                                                                                                                                                                | N/A;<br>Δppm=14 | 458.347 |
| *PC(12:0/11:0)[U] or a similar compound* tentative based on exact mass match                                                                                                                                       | M+H-H <sub>2</sub> O  |                                                                                                                                                                                                                                                                | N/A;<br>Δppm=12 | 590.426 |

|                                                                           |                             |                                                                                      |                       |                |
|---------------------------------------------------------------------------|-----------------------------|--------------------------------------------------------------------------------------|-----------------------|----------------|
| <p>*Arachidoyl glycine*<br/>tentative based on<br/>methanol precursor</p> | <p>M+CH<sub>3</sub>OH+H</p> | 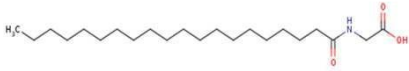   | <p>82</p>             | <p>402.359</p> |
| <p>1-Hexadecyl-2-O-<br/>methyl-glycerol</p>                               | <p>M+ACN+H</p>              |   | <p>53</p>             | <p>372.35</p>  |
| <p>*Cholest-5-ene*<br/>tentative based on<br/>exact match</p>             | <p>M+H-H<sub>2</sub>O</p>   |  | <p>N/A<br/>Δppm=6</p> | <p>353.355</p> |

|                                                                                                                     |                |                                                                                      |                                         |                |
|---------------------------------------------------------------------------------------------------------------------|----------------|--------------------------------------------------------------------------------------|-----------------------------------------|----------------|
| <p>*Nb-<br/>Arachidoyltryptamin<br/>e* tentative based on<br/>exact mass match</p>                                  | <p>M+ACN+H</p> | 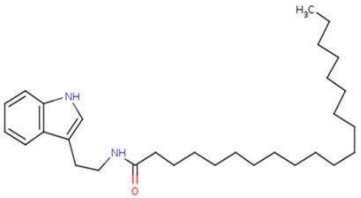   | <p>N/A<br/><math>\Delta</math>ppm=8</p> | <p>496.422</p> |
| <p>Unidentified<br/>Molecule 8</p>                                                                                  |                |                                                                                      |                                         | <p>540.452</p> |
| <p>Unidentified<br/>Molecule 9</p>                                                                                  |                |                                                                                      |                                         | <p>326.38</p>  |
| <p>*Hydroxynervonic<br/>acid* tentative based<br/>on exact mass match</p>                                           | <p>M+ACN+H</p> |   | <p>N/A<br/><math>\Delta</math>ppm=7</p> | <p>424.382</p> |
| <p>*N-acyl capnines*<br/>Highly tentative<br/>because sulfonolipid<br/>and minus water and<br/>exact mass match</p> | <p>M+H-H2O</p> |  | <p>N/A<br/><math>\Delta</math>ppm=3</p> | <p>584.473</p> |

|                                                                                                                                           |                        |                                                                                      |                             |         |
|-------------------------------------------------------------------------------------------------------------------------------------------|------------------------|--------------------------------------------------------------------------------------|-----------------------------|---------|
| <p>*Diglycerides such as DG(14:1(9Z)/20:4(8Z,11Z,14Z,17Z)/0:0)<br/>* tentative based on exact match and precursor requires ACN to fit</p> | M+ACN+H                | 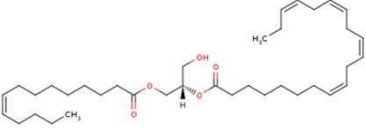   | N/A<br>$\Delta\text{ppm}=8$ | 628.499 |
| <p>*1'H-5alpha-Cholest-2-eno[3,2-b]indole*<br/>tentative based on exact match; this chemical has shown up under a similar</p>             | M+H-2H <sub>2</sub> O  |    | N/A<br>$\Delta\text{ppm}=8$ | 424.37  |
| <p>*Long Monoglycerides such as MG(20:0/0:0/0:0)*tentative based on exact match</p>                                                       | M+ACN+H                |  | N/a<br>$\Delta\text{ppm}=3$ | 428.375 |
| <p>*N-stearoyl valine*<br/>tentative based on exact mass</p>                                                                              | M+CH <sub>3</sub> OH+H |  | N/a<br>$\Delta\text{ppm}=4$ | 416.375 |

|                                                                                                                                    |                        |                                                                                      |                    |         |
|------------------------------------------------------------------------------------------------------------------------------------|------------------------|--------------------------------------------------------------------------------------|--------------------|---------|
| <p>*C-6 Ceramide*<br/>somewhat tentative<br/>due to lots of "noise"<br/>on MS/MS match</p>                                         | M+H                    |    | 17                 | 398.363 |
| Unidentified<br>Molecule 10                                                                                                        |                        |                                                                                      |                    | 424.426 |
| <p>*N-<br/>Heptanoylsolamine*<br/>tentative based on<br/>exact match and<br/>known sources of the<br/>molecule</p>                 | M+CH <sub>3</sub> OH+H |   | N/a<br>Δppm=1<br>1 | 360.363 |
| <p>Diglyceride such as<br/>DG(16:1(9Z)/0:0/16:<br/>1(9Z)) (d5)*<br/>Tentative based on<br/>exact mass match<br/>and water loss</p> | M+H-H <sub>2</sub> O   |  | N/a<br>Δppm=1<br>5 | 542.442 |
| <p>*Ergosterol*<br/>tentative because not<br/>found in mammalian<br/>cells</p>                                                     | M+ACN+H                |  | 9                  | 438.378 |

|                                                                                                                                                |          |                                                                                                                                                                                                                                                                                                                                                                                                                              |                       |         |
|------------------------------------------------------------------------------------------------------------------------------------------------|----------|------------------------------------------------------------------------------------------------------------------------------------------------------------------------------------------------------------------------------------------------------------------------------------------------------------------------------------------------------------------------------------------------------------------------------|-----------------------|---------|
| <p>*5-<math>\alpha</math>-Cholane*<br/>tentative based on exact mass match and high ppm difference and precursor</p>                           | M+ACN+Na | 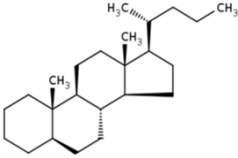                                                                                                                                                                                                                                                                                                                                            | N/A<br>$\Delta$ ppm=2 | 394.353 |
| <p>*26,27-Dihomo-1<math>\alpha</math>-hydroxyvitamin D2*<br/>Tentative based on exact mass match and precursor with acetonitrile</p>           | M+ACN+H  |                                                                                                                                                                                                                                                                                                                                             | N/A<br>$\Delta$ ppm=1 | 482.405 |
| Leu Lys His                                                                                                                                    | M+H-H2O  |                                                                                                                                                                                                                                                                                                                                           | 33                    | 379.239 |
| <p>*Campestane skeleton or Ergostane skeleton* Highly tentative due to the chemicals being "skeletons" and exact mass match and water loss</p> | M+H-H2O  |  <div data-bbox="662 1293 954 1402" style="border: 1px solid black; padding: 5px; margin: 5px 0;">Campestane skeleton</div>  <div data-bbox="662 1577 987 1654" style="border: 1px solid black; padding: 5px; margin: 5px 0;">Ergostane skeleton</div> | N/A<br>$\Delta$ ppm=6 | 369.386 |



|                                                                                    |                        |                                                                                      |                            |         |
|------------------------------------------------------------------------------------|------------------------|--------------------------------------------------------------------------------------|----------------------------|---------|
| *Alexidine* Highly tentative due to exact match, precursor, and nature of chemical | M+ACN+H                | 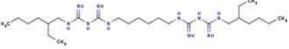   | N/A<br>$\Delta$ ppm=1<br>3 | 550.495 |
| Unidentified Molecule 11                                                           |                        |                                                                                      |                            | 452.459 |
| *ergostan-3 $\beta$ -ol* tentative due to exact mass match                         | M+H-H <sub>2</sub> O   |    | N/A<br>$\Delta$ ppm=1<br>3 | 385.38  |
| Unidentified Molecule 12                                                           |                        |                                                                                      |                            | 312.363 |
| C-6 Ceramide                                                                       | M+CH <sub>3</sub> OH+H |  | 18                         | 430.39  |
| *Hydroxynervonic acid* tentative based on exact mass match and precursor ion       | M+NH <sub>4</sub>      |  | N/A<br>$\Delta$ ppm=2      | 400.38  |

|                                                                                                     |                       |                                                                                      |                               |         |
|-----------------------------------------------------------------------------------------------------|-----------------------|--------------------------------------------------------------------------------------|-------------------------------|---------|
| Oleamide                                                                                            | M+H                   |     | 52                            | 282.28  |
| *A 80987* Highly tentative due to exact mass match, especially with a high molecular mass like this | M+H                   |    | N/A<br>$\Delta\text{ppm} = 5$ | 654.333 |
| *Amataine* tentative based on exact mass search and water loss from precursor                       | M+H-2H <sub>2</sub> O |    | N/A<br>$\Delta\text{ppm} = 2$ | 681.343 |
| *Dihydro Isorescinnamine* tentative based on exact match and known source of chemical               | M+H                   |   | N/A<br>$\Delta\text{ppm} = 7$ | 637.307 |
| O-Arachidonoyl Glycidol                                                                             | M+H-H <sub>2</sub> O  |  | 35                            | 393.299 |

|                                                                                                           |         |                                                                                      |                        |         |
|-----------------------------------------------------------------------------------------------------------|---------|--------------------------------------------------------------------------------------|------------------------|---------|
| *Doxercalciferol*<br>tentative based on<br>ammonium in<br>precursor and a much<br>less busy MSMS<br>graph | M+NH4   | 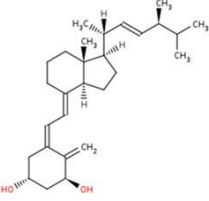    | 54                     | 430.365 |
| Undecanoic acid                                                                                           | M+ACN+H |     | 45                     | 228.196 |
| Kalkitoxin                                                                                                | M+ACN+H |   | 44                     | 408.309 |
| Unidentified<br>Molecule 14                                                                               |         |                                                                                      |                        | 689.491 |
| Unidentified<br>Molecule 15                                                                               |         |                                                                                      |                        | 623.452 |
| Unidentified<br>Molecule 16                                                                               |         |                                                                                      |                        | 601.441 |
| *Docosanedioic<br>acid* Tentative based<br>on exact mass match                                            | M+H     |  | N/A<br>$\Delta$ ppm =2 | 371.316 |

|                                                                                                                                   |                                                               |                                                                                                                                                                                 |                         |         |
|-----------------------------------------------------------------------------------------------------------------------------------|---------------------------------------------------------------|---------------------------------------------------------------------------------------------------------------------------------------------------------------------------------|-------------------------|---------|
| <p>*(3b,24R,25x)-26-Benzoyloxystigmast-5-ene-3-ol* Highly tentative based on exact mass match and high <math>\Delta</math>ppm</p> | M+H                                                           | 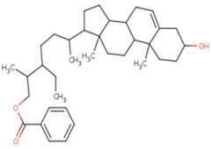                                                                                               | N/A<br>$\Delta$ ppm =25 | 535.401 |
| Unidentified Molecule 17                                                                                                          |                                                               |                                                                                                                                                                                 |                         | 615.456 |
| <p>*Val Leu Lys* tentative</p>                                                                                                    | M+CH <sub>3</sub> OH+H                                        |                                                                                               | 29                      | 391.286 |
| <p>*9-Oxoasimicinone* Highly tentative based on exact mass match and known source of molecule</p>                                 | M+H                                                           |                                                                                              | N/A<br>$\Delta$ ppm =4  | 637.47  |
| <p>*Glycosides such as Niazinin A or Eruberin B* Highly tentative based on exact mass match and the precursors</p>                | Niazinin A-<br>M+NH <sub>4</sub> ;<br>Eruberin B-<br>M+ACN+Na |  <p style="text-align: center;">Niazinin A</p> <p style="text-align: center;">Eruberin B</p> | N/A<br>$\Delta$ ppm =0  | 704.252 |

|                                                                                                                                |      |                                                                                      |                                |         |
|--------------------------------------------------------------------------------------------------------------------------------|------|--------------------------------------------------------------------------------------|--------------------------------|---------|
| Unidentified Molecule 20                                                                                                       |      |                                                                                      |                                | 659.482 |
| *Parasiloxanthin*<br>Tentative due to exact mass match and precursor, chosen because it is a marine lipid and not a carotenoid | M+Na | 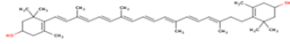   | N/A<br>$\Delta\text{ppm} = 14$ | 593.442 |
| *Phosphatidic Acids similar to PA(O-16:0/20:5(5Z,8Z,11Z,14Z,17Z))* tentative based on exact mass match                         | M+H  |    | N/A<br>$\Delta\text{ppm} = 12$ | 681.494 |
| Unidentified Molecule 19                                                                                                       |      |                                                                                      |                                | 725.522 |
| *Cardiolipins such as CL(1'-[16:0/18:1(11Z)],3'-[16:0/18:1(11Z)])* Tentative based on exact mass match                         | M+2H |  | N/A<br>$\Delta\text{ppm} = 0$  | 703.509 |
| Unidentified Molecule 20                                                                                                       |      |                                                                                      |                                | 571.432 |
| Unidentified Molecule 21                                                                                                       |      |                                                                                      |                                | 549.419 |
| Unidentified Molecule 22                                                                                                       |      |                                                                                      |                                | 368.428 |

|                                                                                                                                                     |                        |                                                                                      |                                      |         |
|-----------------------------------------------------------------------------------------------------------------------------------------------------|------------------------|--------------------------------------------------------------------------------------|--------------------------------------|---------|
| *HU-211* Tentative identification based on low metlin score                                                                                         | M+CH <sub>3</sub> OH+H | 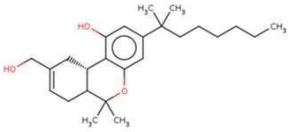   | 8                                    | 419.319 |
| Unidentified Molecule 23                                                                                                                            |                        |                                                                                      |                                      | 992.742 |
| *Lactosylceramide* tentative based on exact mass match                                                                                              | M+H                    |    | score:<br>N/A<br>$\Delta$ ppm=1<br>9 | 948.716 |
| Unidentified Molecule 23<br>*Maslinic Acid possible if precursor                                                                                    |                        |                                                                                      |                                      | 505.39  |
| *Triglycerides similar to TG(22:3(10Z,13Z,16Z)/22:5(7Z,10Z,13Z,16Z,19Z)/22:6(4Z,7Z,10Z,13Z,16Z,19Z))[iso6]* Tentative based off of exact mass match | M+H+Na                 |  | score:<br>N/A<br>$\Delta$ ppm=9      | 527.403 |
| 13Z-Docosenamide                                                                                                                                    | M+H                    |  | 37                                   | 338.342 |

|                                                                                                             |                        |                                                                                      |                                                    |         |
|-------------------------------------------------------------------------------------------------------------|------------------------|--------------------------------------------------------------------------------------|----------------------------------------------------|---------|
| <p>*Phosphatidylethanol amines similar to PE(22:1(11Z)/19:0)*<br/>tentative based on exact mass match</p>   | M+H                    |    | <p>score:<br/>N/A<br/><math>\Delta</math>ppm=6</p> | 816.642 |
| <p>*Cyclopassifloic acid B* tentative based on exact mass match and known sources of chemical</p>           | M+CH <sub>3</sub> OH+H |    | <p>score:<br/>N/A<br/><math>\Delta</math>ppm=2</p> | 553.408 |
| Arg Arg Lys                                                                                                 | M+H-H <sub>2</sub> O   |   | 35                                                 | 441.301 |
| <p>*Phosphatidylinositols similar to PI(O-16:0/22:2(13Z,16Z))<br/>* tentative based on exact mass match</p> | M+H-H <sub>2</sub> O   |  | <p>score:<br/>N/A<br/><math>\Delta</math>ppm=0</p> | 859.606 |

|                                                                                                                                                                                                                  |                       |                                                                                      |                                                          |         |
|------------------------------------------------------------------------------------------------------------------------------------------------------------------------------------------------------------------|-----------------------|--------------------------------------------------------------------------------------|----------------------------------------------------------|---------|
| <p>*1-O-alpha-D-glucopyranosyl-1,2-nonadecandiol*</p> <p>Highly tentative based on exact mass match, chosen over closer compounds due to precursor and known sources of other chemicals, as well as chemical</p> | M+H                   | 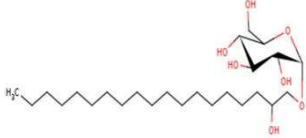   | <p>score:<br/>N/A<br/><math>\Delta</math>ppm=1<br/>0</p> | 859.606 |
| <p>*Heptane-1-thiol*</p> <p>tentative based on exact mass match and known sources of the chemical as well as the precursor</p>                                                                                   | M+H-2H <sub>2</sub> O |    | <p>score:<br/>N/A<br/><math>\Delta</math>ppm=5</p>       | 97.0839 |
| <p>Palmitoyl Serinol</p>                                                                                                                                                                                         | M+ACN+H               |  | 27                                                       | 371.324 |
| <p>Betaine Aldehyde</p>                                                                                                                                                                                          | M+H-H <sub>2</sub> O  |  | 13-31                                                    | 84.0822 |
| <p>Arachidoyl glycine</p>                                                                                                                                                                                        | M+ACN+Na              |  | 85                                                       | 433.333 |



|                                                                                                                                |                             |                                                                                      |                                                          |                |
|--------------------------------------------------------------------------------------------------------------------------------|-----------------------------|--------------------------------------------------------------------------------------|----------------------------------------------------------|----------------|
| <p>*1,1'-(1,4-Dihydro-4-nonyl-3,5-pyridinediyl)bis[1-dodecanone]*<br/>tentative based on exact mass match</p>                  | <p>M+CH<sub>3</sub>OH+H</p> | 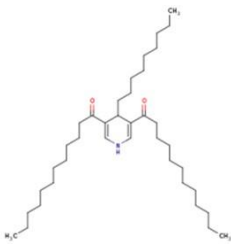    | <p>score:<br/>N/A<br/><math>\Delta</math>ppm<br/>=17</p> | <p>604.577</p> |
| <p>Unidentified<br/>Molecule 25 (none of the exact mass results seemed plausible due to the precursors and high delta ppm)</p> |                             |                                                                                      |                                                          | <p>560.551</p> |
| <p>*Cer(d18:0/17:0)*<br/>tentative based on exact mass match</p>                                                               | <p>M+CH<sub>3</sub>OH+H</p> |   | <p>score:<br/>N/A<br/><math>\Delta</math>ppm<br/>=15</p> | <p>586.568</p> |
| <p>*Juliflorine* tentative based on exact mass match and known sources of chemical</p>                                         | <p>M+H</p>                  |  | <p>score:<br/>N/A<br/><math>\Delta</math>ppm =0</p>      | <p>630.593</p> |
| <p>*Juliflorine(different precursor)* tentative based on exact mass match and known sources of chemical</p>                    | <p>M+H-H<sub>2</sub>O</p>   |  | <p>score:<br/>N/A<br/><math>\Delta</math>ppm =0</p>      | <p>612.583</p> |

|                                                                                                                                                                               |         |                                                                                      |                                                      |         |
|-------------------------------------------------------------------------------------------------------------------------------------------------------------------------------|---------|--------------------------------------------------------------------------------------|------------------------------------------------------|---------|
| <p>*8-Methyl-3-hentriacontene* tentative based on exact mass match and ammonia precursor</p>                                                                                  | M+NH4   | 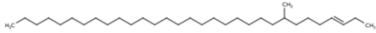   | <p>score:<br/>N/A<br/><math>\Delta</math>ppm =2</p>  | 466.536 |
| <p>*VITAMIN E SUCCINATE(TOCOPHEROL SUCCINATE)* tentative based on exact mass match, chosen over other possibilities due to known sources of the chemicals, and precursors</p> | M+Na    |    | <p>score:<br/>N/A<br/><math>\Delta</math>ppm =11</p> | 553.393 |
| <p>*Oceanin* tentative based on exact mass match and numerous possible chemicals</p>                                                                                          | M+2Na-H |  | <p>score:<br/>N/A<br/><math>\Delta</math>ppm =3</p>  | 531.409 |
| <p>Unidentified Molecule 26</p>                                                                                                                                               |         |                                                                                      |                                                      | 578.563 |

|                                                                                                                            |                  |                                                                                                                                                                                                                                        |                                    |                |
|----------------------------------------------------------------------------------------------------------------------------|------------------|----------------------------------------------------------------------------------------------------------------------------------------------------------------------------------------------------------------------------------------|------------------------------------|----------------|
| <p>*Ceramide similar to Ceramide (d18:1/25:0)* Highly tentative based on exact mass match, could also be a diglyceride</p> | <p>M+2Na-H</p>   | 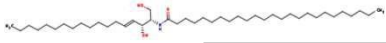 <p><b>Ceramide (d18:1/25:0)</b></p>  <p><b>Cer(d18:1/25:0)</b></p> | <p>score:<br/>N/A<br/>Δppm =1</p>  | <p>708.623</p> |
| <p>*N-Oleoyl-D-erythro-Sphingosine (C18:1 Ceramide)* tentative</p>                                                         | <p>M+CH3OH+H</p> |                                                                                                                                                      | <p>score:<br/>N/A<br/>Δppm =5</p>  | <p>582.549</p> |
| <p>*Heneicosanyl oleate* tentative</p>                                                                                     | <p>M+ACN+Na</p>  |                                                                                                                                                    | <p>score:<br/>N/A<br/>Δppm =9</p>  | <p>612.563</p> |
| <p>*Cer(d18:2/21:0)* tentative</p>                                                                                         | <p>M+H</p>       |                                                                                                                                                     | <p>score:<br/>N/A<br/>Δppm =17</p> | <p>606.593</p> |

|                                                                                      |                        |                                                                                      |                                   |         |
|--------------------------------------------------------------------------------------|------------------------|--------------------------------------------------------------------------------------|-----------------------------------|---------|
| Unidentified Molecule 27                                                             |                        |                                                                                      |                                   | 608.577 |
| *Phosphatidic Acids similar to PA(12:0/12:0)[U]* tentative based on exact mass match | M+CH <sub>3</sub> OH+H | 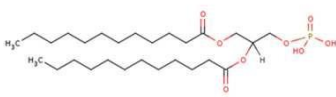   | score:<br>N/A<br>$\Delta$ ppm =1  | 569.38  |
| *Hemsleyin imine A* tentative based on exact mass match and high $\Delta$ ppm        | M+H-H <sub>2</sub> O   |    | score:<br>N/A<br>$\Delta$ ppm =19 | 588.583 |
| Unidentified Molecule 28                                                             |                        |                                                                                      |                                   | 632.609 |
| *14:0 Cholesteryl ester*                                                             | M+NH <sub>4</sub>      |  | score:<br>N/A<br>$\Delta$ ppm =19 | 614.599 |
| Unidentified Molecule 29                                                             |                        |                                                                                      |                                   | 632.609 |
| *2S,3R-didecanoyl-docosane-2,3-diol*                                                 | M+H-H <sub>2</sub> O   |   | score:<br>N/A<br>$\Delta$ ppm =11 | 633.611 |

|                                                                       |       |                                                                                      |                                      |         |
|-----------------------------------------------------------------------|-------|--------------------------------------------------------------------------------------|--------------------------------------|---------|
| *Cer(d18:1/23:0)*<br>tentative due to large<br>$\Delta$ ppm           | M+Na  |    | score:<br>N/A<br>$\Delta$ ppm<br>=11 | 658.624 |
| *CE(16:0)* tentative<br>due to exact mass<br>match                    | M+NH4 |    | score:<br>N/A<br>$\Delta$ ppm<br>=15 | 642.629 |
| *Monocyclic<br>botryococcane*<br>tentative due to exact<br>mass match | M+NH4 |   | score:<br>N/A<br>$\Delta$ ppm =1     | 494.566 |
| *Cer(d18:0/22:0)*<br>exact mass match                                 | M+Na  |  | score:<br>N/A<br>$\Delta$ ppm<br>=18 | 646.623 |
| *Cer(d18:0/25:0)*<br>exact mass match                                 | M+Na  |  | score:<br>N/A<br>$\Delta$ ppm<br>=16 | 688.669 |
| Unidentified<br>Molecule 30                                           |       |                                                                                      |                                      | 610.577 |

|                                                                                                         |         |                                                                                      |                                   |                                     |
|---------------------------------------------------------------------------------------------------------|---------|--------------------------------------------------------------------------------------|-----------------------------------|-------------------------------------|
| *Diglycerides such as DG(20:0/16:1(9Z)/0:0)* tentative based on exact mass match and precursor          | M+NH4   | 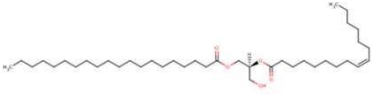   | score:<br>N/A<br>$\Delta$ ppm =1  | 640.587                             |
| Unidentified Molecule 31                                                                                |         |                                                                                      |                                   | 632.609                             |
| *Ethylene glycol distearate* tentative based on exact mass match                                        | M+ACN+H |    | score:<br>N/A<br>$\Delta$ ppm =1  | 636.5934<br>753,<br>636.6024<br>780 |
| *Diglycerides such as DG(22:1(13Z)/15:0/0:0)* tentative based on exact mass match and high $\Delta$ ppm | M+NH4   |  | score:<br>N/A<br>$\Delta$ ppm =21 | 654.589                             |
| Unidentified Molecule 32                                                                                |         |                                                                                      |                                   | 632.609                             |
| *Diglycerides such as DG(18:0/18:0/0:0)* tentative based on exact mass match                            | M+ACN+H |  | score:<br>N/A<br>$\Delta$ ppm =0  | 666.603                             |

|                                                                                                          |                        |                                                                                      |                                      |         |
|----------------------------------------------------------------------------------------------------------|------------------------|--------------------------------------------------------------------------------------|--------------------------------------|---------|
| *Cer(d18:0/23:0)*<br>tentative based on<br>exact mass match                                              | M+Na                   | 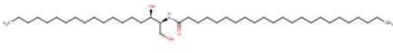   | score:<br>N/A<br>$\Delta$ ppm<br>=22 | 660.641 |
| *Cer(d18:2/20:0)*<br>tentative based on<br>exact mass match                                              | M+CH <sub>3</sub> OH+H |    | score:<br>N/A<br>$\Delta$ ppm =0     | 624.593 |
| *Cer(d18:2/23:0)*<br>tentative based on<br>exact mass match                                              | M+H                    |  | score:<br>N/A<br>$\Delta$ ppm<br>=19 | 634.626 |
| *Cholesteryl ester<br>such as 13(S)-HODE<br>cholesteryl ester*<br>tentative based on<br>exact mass match | M+NH <sub>4</sub>      |  | score:<br>N/A<br>$\Delta$ ppm<br>=11 | 682.621 |
| Tridodecylamine                                                                                          | M+H                    |  | score:<br>N/A<br>$\Delta$ ppm =1     | 522.598 |

|                                                                   |           |                                                                                      |                                                          |         |
|-------------------------------------------------------------------|-----------|--------------------------------------------------------------------------------------|----------------------------------------------------------|---------|
| <p>*Ceramides similar to Cer(d18:1/24:1(15Z))<br/>* tentative</p> | M+H       | 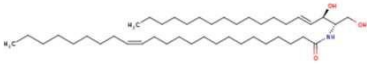   | <p>score:<br/>N/A<br/><math>\Delta</math>ppm<br/>=15</p> | 648.639 |
| <p>3-Hydroxyphenylacetic acid</p>                                 | M+NH4     |     | 72                                                       | 170.079 |
| <p>*Gambieric acid D*<br/>tentative based on exact mass match</p> | M+NH4     |  | <p>score:<br/>N/A<br/><math>\Delta</math>ppm<br/>=13</p> | 1216.75 |
| <p>*Cer(d18:2/21:0)*<br/>tentative</p>                            | M+CH3OH+H |  | <p>score:<br/>N/A<br/><math>\Delta</math>ppm =0</p>      | 638.609 |
| <p>*NeuAalpha2-3Galbeta-Cer(d18:1/26:0)*<br/>tentative</p>        | M+ACN+Na  |  | <p>score:<br/>N/A<br/><math>\Delta</math>ppm<br/>=11</p> | 1194.82 |



|                                                                                         |          |                                                                                      |                                    |         |
|-----------------------------------------------------------------------------------------|----------|--------------------------------------------------------------------------------------|------------------------------------|---------|
| <p>*Diglyceride similar to DG(20:1(11Z)/18:0/0:0)* tentative</p>                        | M+NH4    | 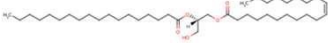   | <p>score:<br/>N/A<br/>Δppm =0</p>  | 668.619 |
| <p>*Simonin III* tentative based on exact mass match</p>                                | M+H-2H2O |     | <p>score:<br/>N/A<br/>Δppm =18</p> | 1215.75 |
| <p>Unidentified Molecule 33</p>                                                         |          |                                                                                      |                                    | 664.623 |
| <p>*alpha-Amyrin palmitate* tentative due to exact mass match</p>                       | M+H      |  | <p>score:<br/>N/A<br/>Δppm =5</p>  | 665.627 |
| <p>*22-Angeloylbarringtonol C* tentative due to exact mass match</p>                    | M+H-2H2O |  | <p>score:<br/>N/A<br/>Δppm =0</p>  | 537.395 |
| <p>*Diglycerides such as DG(16:0/22:0/0:0)[iso2]* tentative due to exact mass match</p> | M+ACN+H  |  | <p>score:<br/>N/A<br/>Δppm =2</p>  | 694.633 |

|                                                                                                           |                             |                                                                                      |                                    |                         |
|-----------------------------------------------------------------------------------------------------------|-----------------------------|--------------------------------------------------------------------------------------|------------------------------------|-------------------------|
| <p>*Diglycerides such as DG(14:1(9Z)/20:0/0:0)* tentative</p>                                             | <p>M+H-2H<sub>2</sub>O</p>  | 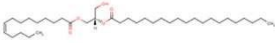   | <p>score:<br/>N/A<br/>Δppm =8</p>  | <p>559.515</p>          |
| <p>*N-(2R-Hydroxypentacosanoyl)-2S-amino-1,3S,4R-octadecanetriol* tentative based on exact mass match</p> | <p>M+H-2H<sub>2</sub>O</p>  |    | <p>score:<br/>N/A<br/>Δppm =13</p> | <p>662.654<br/>2969</p> |
| <p>*Phosphatidic Acids similar to PA(13:0/18:2(9Z,12Z)))* exact mass match</p>                            | <p>M+CH<sub>3</sub>OH+H</p> |   | <p>score:<br/>N/A<br/>Δppm =5</p>  | <p>663.456</p>          |
| <p>*Phosphatidic Acids similar to PA(O-16:0/18:0)* exact mass match</p>                                   | <p>M+2Na-H</p>              |  | <p>score:<br/>N/A<br/>Δppm =3</p>  | <p>707.494</p>          |

|                                                                                                                         |          |                                                                                      |                                  |         |
|-------------------------------------------------------------------------------------------------------------------------|----------|--------------------------------------------------------------------------------------|----------------------------------|---------|
| 3-hexanoyl-NBD<br>Cholesterol                                                                                           | M+Na     | 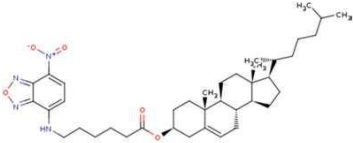   | 33                               | 685.437 |
| Phosphatidylglycerols<br>similar to<br>PG(19:1(9Z)/13:0)                                                                |          |    | score:<br>N/A<br>$\Delta$ ppm =8 | 721.508 |
| *(3R,2'S)-Myxol 2'-<br>(2,4-di-O-methyl- $\alpha$ -L-<br>fucoside)* highly<br>tentative due to exact<br>mass match      | M+H      |  | score:<br>N/A<br>$\Delta$ ppm =5 | 759.524 |
| *Phosphatidylcholine<br>s similar to<br>PC(20:5(5Z,8Z,11Z,14Z,17Z)/18:2(9Z,12Z)))* tentative due to<br>exact mass match | M+H-2H2O |  | score:<br>N/A<br>$\Delta$ ppm =0 | 768.533 |

|                                                                                                                                                           |                       |                                                                                      |                                                      |         |
|-----------------------------------------------------------------------------------------------------------------------------------------------------------|-----------------------|--------------------------------------------------------------------------------------|------------------------------------------------------|---------|
| <p>3(GalNAc<math>\beta</math>1-4)Gal<math>\beta</math>1-4Glc<math>\beta</math>1-Cer(d18:1/26:1(17Z))<br/>* highly tentative based on exact mass match</p> | M+H-H <sub>2</sub> O  | 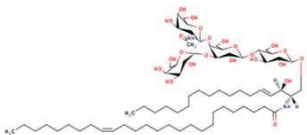   | <p>score:<br/>N/A<br/><math>\Delta</math>ppm =6</p>  | 1347.88 |
| <p>*Dimethyl dialkyl ammonium chloride*<br/>highly tentative based on exact mass match</p>                                                                | M+ACN+H               |    | <p>score:<br/>N/A<br/><math>\Delta</math>ppm =23</p> | 550.629 |
| <p>*Triglycerides similar to TG(19:0/22:4(7Z,10Z,13Z,16Z)/22:6(4Z,7Z,10Z,13Z,16Z,19Z)))[iso6]* tentative based on exact mass match</p>                    | M+H-2H <sub>2</sub> O |  | <p>score:<br/>N/A<br/><math>\Delta</math>ppm =4</p>  | 961.806 |
| <p>Betaine(sodiated not protonated)</p>                                                                                                                   | M+Na                  |   | 40                                                   | 140.069 |

|                                                                            |         |                                                                                                                                                                                                                                                                                                                                                                                  |                          |         |
|----------------------------------------------------------------------------|---------|----------------------------------------------------------------------------------------------------------------------------------------------------------------------------------------------------------------------------------------------------------------------------------------------------------------------------------------------------------------------------------|--------------------------|---------|
| 2-oxo-3-methylvaleric acid                                                 | M+NH4   | 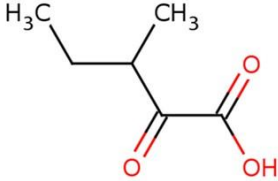 <p>The structure shows a five-carbon chain with a methyl group at the 3-position, a ketone group at the 2-position, and a carboxylic acid group at the 1-position. The methyl group is labeled H<sub>3</sub>C and CH<sub>3</sub>. The ketone and carboxylic acid groups are shown in red.</p> | 26-30                    | 148.097 |
| *Ceramides similar to Cer(d18:1/24:1(15Z))<br>* tentative exact mass match | M+H-H2O |  <p>The structure shows a sphingosine backbone with a long-chain fatty acid (24:1(15Z)) and a sphingosine head group. The sphingosine head group is shown in red.</p>                                                                                                                          | score:<br>N/A,<br>Δppm=0 | 666.641 |
| *Diglycerides similar to DG(22:0/18:1(9Z)/0:0)* tentative exact mass match | M+NH4   |  <p>The structure shows a glycerol backbone with two long-chain fatty acids (22:0 and 18:1(9Z)) and a phosphate group. The phosphate group is shown in red.</p>                                                                                                                              | score:<br>N/A,<br>Δppm=1 | 696.651 |

|                                                                                                             |                 |                                                                                                                                                                                                                                                |                                                           |                |
|-------------------------------------------------------------------------------------------------------------|-----------------|------------------------------------------------------------------------------------------------------------------------------------------------------------------------------------------------------------------------------------------------|-----------------------------------------------------------|----------------|
| <p>*Ceramide similar to Cer(d18:2/20:1)*<br/>tentative</p>                                                  | <p>M+ACN+H</p>  | 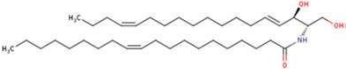                                                                                                                                                             | <p>score:<br/>N/A,<br/><math>\Delta</math>ppm=2</p>       | <p>631.576</p> |
| <p>*Vitamin D3<br/>palmitate or 16:1<br/>Cholesteryl ester*<br/>tentative based on<br/>exact mass match</p> | <p>M+H-2H2O</p> |  <p><b>Vitamin D3 palmitate</b></p>  <p><b>16:1 Cholesteryl ester</b></p> | <p>score:<br/>N/A,<br/><math>\Delta</math>ppm=1<br/>2</p> | <p>587.549</p> |
| <p>*DG(16:0e/18:0/0:0)<br/>*</p>                                                                            | <p>M+H-H2O</p>  |                                                                                                                                                            | <p>score:<br/>N/A,<br/><math>\Delta</math>ppm=1<br/>9</p> | <p>565.567</p> |

|                                                                  |         |                                                                                      |                                       |         |
|------------------------------------------------------------------|---------|--------------------------------------------------------------------------------------|---------------------------------------|---------|
| *ceramides similar to Cer(d18:0/18:0)*                           | M+ACN+H | 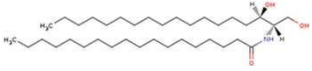   | score:<br>N/A,<br>$\Delta$ ppm=1<br>7 | 609.603 |
| Unidentified Chemical 34                                         |         |                                                                                      |                                       | 578.66  |
| 2-demethylmenaquinone-8<br>* tentative based on exact mass match | M+H     |    | score:<br>N/A,<br>$\Delta$ ppm=3      | 703.547 |
| HU210                                                            | M+H-H2O |  | 2 – 21                                | 371.297 |
| HU210                                                            | M+H-H2O |  | 2 – 9                                 | 371.293 |

|                                                        |                        |                                                                                                                                                                                                                                                                                                                                                                                 |               |         |
|--------------------------------------------------------|------------------------|---------------------------------------------------------------------------------------------------------------------------------------------------------------------------------------------------------------------------------------------------------------------------------------------------------------------------------------------------------------------------------|---------------|---------|
| Glucosaminic acid                                      | M+CH <sub>3</sub> OH+H | 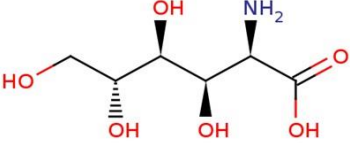 <p>The structure shows a six-carbon chain with a carboxylic acid group at C1, an amino group at C2, and hydroxyl groups at C3, C4, and C6. The hydroxyl groups at C3 and C4 are shown with dashed bonds, while the hydroxyl at C6 and the amino group at C2 are shown with wedged bonds.</p> | 5             | 228.107 |
| *Octylamine*<br>tentative based on<br>exact mass match | M+H                    |  <p>The structure shows a straight-chain alkane with a methyl group (H<sub>3</sub>C) at one end and an amino group (NH<sub>2</sub>) at the other, representing octylamine.</p>                                                                                                                | N/A<br>Δppm=3 | 130.159 |
| 2-Pyrrolidinone                                        | M+H                    |  <p>The structure shows a five-membered ring containing one nitrogen atom and one carbonyl group (C=O) at the 2-position, representing 2-pyrrolidinone.</p>                                                                                                                                  | 42            | 86.0616 |



|                                                                                              |                           |                                                                                      |                       |                |
|----------------------------------------------------------------------------------------------|---------------------------|--------------------------------------------------------------------------------------|-----------------------|----------------|
| <p>*Triglycerides similar to TG(15:0/18:1(9Z)/16:1(9Z))[iso6]* based on exact mass match</p> | <p>M+Na</p>               | 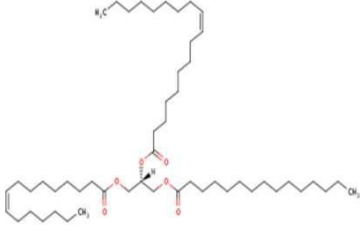   | <p>N/A<br/>Δppm=1</p> | <p>825.694</p> |
| <p>*HU210* tentative based on exact mass match</p>                                           | <p>M+H-H<sub>2</sub>O</p> |   | <p>15</p>             | <p>371.289</p> |
| <p>Pyroglutamic Acid</p>                                                                     | <p>M+ACN+H</p>            |  | <p>94</p>             | <p>171.077</p> |

|                |      |                                                                                      |    |         |
|----------------|------|--------------------------------------------------------------------------------------|----|---------|
| 1-Hexanol      | M+H  | 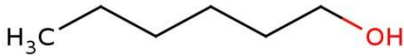   | 37 | 121.123 |
| 1-Hexanol      | M+H  |    | 27 | 103.112 |
| Anacardic Acid | M+Na |  | 6  | 371.257 |
